# Supplementary material for: Co-aggregation and secondary nucleation in the life cycle of human prolactin/galanin functional amyloids
Source: eLife. 2022 Mar 8;11:e73835. doi: 10.7554/eLife.73835 (PMC8993219; doi:10.7554/eLife.73835)
Supplement: Figure 1—source data 1. [file elife-73835-fig1-data1.xlsx]

## Sheet: Figure 1c
	GAL			PRL
	Residue Number	β-Aggregation %		Residue Number	β-Aggregation %
	1	0		1	0
	2	0		2	0
	3	0		3	0
	4	0		4	0
	5	0		5	0
	6	0		6	0
	7	0.642		7	0
	8	0.642		8	0
	9	0.642		9	0
	10	0.642		10	0
	11	0.642		11	0
	12	0		12	0
	13	0		13	0.421
	14	0		14	0.421
	15	0		15	0.421
	16	0		16	0.421
	17	0		17	0.421
	18	0		18	8.497
	19	0		19	8.61
	20	0		20	8.189
	21	0		21	8.189
	22	0		22	22.255
	23	0		23	22.255
	24	0		24	22.166
	25	0		25	21.098
	26	0		26	14.837
	27	0		27	0
	28	0		28	0
	29	0		29	0
	30	0		30	0
				31	0
				32	0
				33	0
				34	0
				35	0
				36	0
				37	0
				38	0
				39	0
				40	0
				41	0
				42	0
				43	0
				44	0
				45	0
				46	0
				47	0
				48	0
				49	0
				50	0
				51	0
				52	0
				53	0
				54	0
				55	0
				56	0
				57	0
				58	0
				59	0
				60	0
				61	0
				62	0
				63	0
				64	0
				65	0
				66	0
				67	0
				68	0
				69	0
				70	0
				71	0
				72	0
				73	0
				74	0
				75	0
				76	0
				77	0.002
				78	0.063
				79	0.141
				80	81.783
				81	96.134
				82	96.404
				83	98.477
				84	98.784
				85	97.226
				86	78.2
				87	75.805
				88	64.636
				89	0.078
				90	0.066
				91	0.064
				92	0.002
				93	0
				94	0
				95	1.009
				96	1.009
				97	1.009
				98	1.009
				99	1.009
				100	1.009
				101	1.009
				102	1.009
				103	0
				104	0
				105	0
				106	0
				107	0
				108	0
				109	0
				110	0
				111	0
				112	0
				113	0
				114	0
				115	0
				116	0
				117	0
				118	0
				119	0
				120	0
				121	0
				122	0
				123	0
				124	0
				125	0
				126	0
				127	0
				128	0
				129	0
				130	0
				131	0
				132	1.113
				133	1.31
				134	1.31
				135	1.31
				136	1.31
				137	1.31
				138	0
				139	0
				140	0
				141	0
				142	0
				143	0
				144	0
				145	0
				146	0
				147	0
				148	0
				149	0
				150	0
				151	0
				152	0
				153	0
				154	0
				155	0
				156	0
				157	0
				158	0
				159	0
				160	0
				161	0
				162	0
				163	0
				164	0
				165	0.452
				166	0.452
				167	1.756
				168	3.068
				169	3.068
				170	2.876
				171	2.876
				172	2.682
				173	0
				174	0
				175	0
				176	0
				177	0
				178	0
				179	0
				180	0
				181	0
				182	0
				183	0
				184	0
				185	0
				186	0
				187	0
				188	0
				189	0
				190	0
				191	0
				192	0
				193	0
				194	0
				195	0
				196	0
				197	0
				198	0
				199	0
