# Supplementary material for: Co-aggregation and secondary nucleation in the life cycle of human prolactin/galanin functional amyloids
Source: eLife. 2022 Mar 8;11:e73835. doi: 10.7554/eLife.73835 (PMC8993219; doi:10.7554/eLife.73835)
Supplement: Figure 2—figure supplement 1—source data 1. [file elife-73835-fig2-figsupp1-data1.xlsx]

## Sheet: Fig 2-fig sup 1b GAL
								GAL
							Wavelength (nm)	0d	3d	5d	7d	9d	12d	15d	20d
							260	0	0	0	0	0	0	0	0
							259	-0.00041185	0.16263	0.1779	0.0063613	0.054712	0.1858	0.093133	0.084792
							258	0.0055343	0.28632	0.39049	0.042702	0.13464	0.38768	0.2148	0.19569
							257	-0.021684	0.3506	0.58821	0.027431	0.2204	0.55176	0.36202	0.27711
							256	-0.029055	0.39216	0.76117	0.038263	0.35099	0.71637	0.52982	0.41823
							255	-0.078796	0.46039	0.89672	0.069878	0.56216	0.84107	0.65969	0.57601
							254	-0.0498	0.59682	0.94767	0.11481	0.81147	0.94382	0.75513	0.69793
							253	0.034519	0.76758	0.9646	0.14296	1.0912	0.96787	0.79095	0.79591
							252	0.084855	0.84379	0.87101	0.16658	1.2689	0.90576	0.72506	0.74503
							251	0.13415	0.89216	0.73939	0.18913	1.3075	0.78029	0.62234	0.64058
							250	0.12292	0.80083	0.61952	0.15681	1.2674	0.60779	0.49223	0.54487
							249	0.12804	0.6108	0.5175	0.089939	1.1175	0.41622	0.34631	0.44306
							248	0.15561	0.36697	0.45902	-0.0039084	0.98294	0.19576	0.20449	0.29238
							247	0.15365	0.25751	0.43488	-0.075442	0.8822	0.087542	0.017186	0.15063
							246	0.18731	0.19088	0.46759	-0.10936	0.80333	0.061265	-0.074309	0.0054013
							245	0.27494	0.15152	0.45952	-0.10851	0.83397	0.069674	-0.17602	-0.10427
							244	0.3219	-0.01454	0.43968	-0.11811	0.8075	0.036916	-0.24639	-0.1998
							243	0.41003	-0.13582	0.45751	-0.062976	0.87944	0.039207	-0.2326	-0.22245
							242	0.44862	-0.25486	0.43505	-0.051014	0.90216	-0.0044289	-0.27132	-0.27947
							241	0.45386	-0.27363	0.4517	-0.033474	0.91556	-0.012631	-0.31587	-0.32697
							240	0.51261	-0.23736	0.3887	-0.097671	0.85831	-0.03661	-0.40071	-0.43384
							239	0.55532	-0.21163	0.32532	-0.20845	0.77178	-0.098688	-0.47269	-0.54399
							238	0.5611	-0.27276	0.19435	-0.29586	0.58514	-0.2894	-0.65597	-0.75583
							237	0.52002	-0.47105	0.068202	-0.4738	0.3718	-0.5529	-0.92544	-0.95391
							236	0.39808	-0.7325	-0.10083	-0.72374	0.20183	-0.85275	-1.1664	-1.1707
							235	0.18227	-0.94633	-0.25831	-0.99527	0.037952	-1.0484	-1.4079	-1.3304
							234	-0.10651	-1.1407	-0.4335	-1.3184	-0.088641	-1.2395	-1.6723	-1.5273
							233	-0.39952	-1.2912	-0.53713	-1.5093	-0.1915	-1.3164	-1.8466	-1.6446
							232	-0.65223	-1.5164	-0.6436	-1.6299	-0.30979	-1.3779	-2.0049	-1.7856
							231	-0.74319	-1.5994	-0.69008	-1.5768	-0.28983	-1.3269	-2.0129	-1.7931
							230	-0.84809	-1.6527	-0.65928	-1.5125	-0.21292	-1.2536	-2.0162	-1.7924
							229	-0.88017	-1.6148	-0.63471	-1.4757	-0.11539	-1.162	-2.0165	-1.7834
							228	-0.96588	-1.659	-0.6561	-1.6106	-0.18191	-1.2384	-2.1477	-1.871
							227	-0.83166	-1.5847	-0.54546	-1.7259	-0.27383	-1.2604	-2.1939	-1.9118
							226	-0.68688	-1.5956	-0.52679	-1.9161	-0.49278	-1.4035	-2.2497	-2.017
							225	-0.58868	-1.6741	-0.56878	-2.1248	-0.66547	-1.6142	-2.2454	-2.1973
							224	-0.62303	-1.8879	-0.70803	-2.3333	-0.86459	-1.9318	-2.3808	-2.4368
							223	-0.74576	-2.1471	-0.91904	-2.5916	-1.0215	-2.1404	-2.5618	-2.6419
							222	-0.80296	-2.2502	-1.063	-2.7436	-1.0678	-2.1842	-2.5883	-2.6244
							221	-0.99925	-2.3108	-1.2693	-2.8548	-1.1845	-2.1414	-2.5999	-2.5533
							220	-1.2338	-2.4909	-1.4417	-2.9431	-1.2662	-2.0663	-2.5744	-2.4845
							219	-1.4621	-2.7182	-1.5125	-2.8516	-1.317	-1.9783	-2.4057	-2.4143
							218	-1.5868	-2.9344	-1.5236	-2.7742	-1.3518	-1.9768	-2.2334	-2.3589
							217	-1.6444	-3.005	-1.3947	-2.5946	-1.3244	-1.9312	-1.9538	-2.2177
							216	-1.9273	-3.2062	-1.456	-2.6595	-1.3988	-2.0732	-1.9261	-2.1778
							215	-2.0765	-3.2304	-1.4699	-2.7259	-1.4306	-2.108	-1.9039	-2.0546
							214	-2.3009	-3.3276	-1.6125	-2.952	-1.5743	-2.3163	-2.0839	-2.1507
							213	-2.3277	-3.3503	-1.6723	-3.214	-1.7652	-2.6262	-2.41	-2.3908
							212	-2.5852	-3.7048	-2.1026	-3.7562	-2.1826	-3.2675	-3.0521	-2.9294
							211	-2.9875	-4.2497	-2.7162	-4.484	-2.6141	-4.1722	-3.9159	-3.7619
							210	-3.5832	-5.0114	-3.634	-5.4586	-3.2267	-5.2597	-5.0606	-4.8038
							209	-4.2297	-5.7423	-4.6086	-6.5734	-3.7674	-6.3872	-6.248	-6.046
							208	-5.0504	-6.7003	-5.6764	-7.9059	-4.4675	-7.7379	-7.6969	-7.5586
							207	-6.1222	-7.7843	-6.9316	-9.3437	-5.2891	-9.2586	-9.4104	-9.4547
							206	-7.4727	-9.1351	-8.4038	-11.024	-6.4359	-11.047	-11.452	-11.743
							205	-8.7643	-10.438	-9.7329	-12.595	-7.5799	-13.001	-13.403	-14.177
							204	-9.6808	-11.337	-10.548	-13.915	-8.3304	-14.715	-15.022	-16.276
							203	-10.308	-11.84	-10.913	-14.879	-8.7489	-16.043	-16.253	-17.99
							202	-10.673	-11.999	-10.952	-15.573	-8.8333	-16.95	-17.138	-19.286
							201	-10.586	-11.62	-10.491	-15.786	-8.4789	-17.237	-17.509	-20.053
							200	-10.293	-11.045	-9.8644	-15.795	-7.9425	-17.292	-17.642	-20.53
							199	-9.6281	-10.229	-8.9485	-15.5	-7.18	-17.085	-17.508	-20.547
							198	-8.898	-9.4539	-8.1248	-15.167	-6.3949	-16.78	-17.192	-20.334

## Sheet: Fig 2-fig sup 1b GAL-Hep
							GAL_Hep
						Wavelength (nm)	0d	3d	5d	7d	9d	12d	15d	20d
						260	0	0	0	0	0	0	0	0
						259	0.022438	0.039414	0.13632	-0.012735	-0.07955	0.0057296	0.058911	0.098081
						258	0.059484	0.17705	0.40933	0.024174	-0.091112	0.020315	0.12782	0.23092
						257	0.17709	0.36453	0.66026	0.034628	-0.058218	0.054701	0.17791	0.3642
						256	0.23527	0.52355	0.84646	0.053293	0.010586	0.10828	0.2204	0.44184
						255	0.2993	0.621	0.893	0.047601	0.092398	0.16843	0.25588	0.51923
						254	0.37066	0.70093	0.9836	0.021731	0.15858	0.2119	0.26309	0.59652
						253	0.46448	0.7849	0.90488	-0.036525	0.18043	0.22913	0.18946	0.62667
						252	0.58772	0.82454	0.70667	-0.15787	0.12855	0.21795	0.087883	0.60944
						251	0.62847	0.78802	0.27749	-0.27914	0.034073	0.17694	-0.030796	0.52434
						250	0.60792	0.71113	-0.12933	-0.41549	-0.072814	0.075415	-0.16038	0.41333
						249	0.52758	0.64109	-0.5293	-0.52489	-0.19827	-0.098381	-0.23187	0.26331
						248	0.40005	0.62046	-0.83729	-0.62469	-0.33823	-0.34366	-0.3097	0.094682
						247	0.23234	0.4735	-1.199	-0.75626	-0.52719	-0.63569	-0.39546	-0.14316
						246	-0.025325	0.25304	-1.5944	-0.80084	-0.66456	-0.94553	-0.56179	-0.41556
						245	-0.27878	-0.071534	-1.9937	-0.83636	-0.81064	-1.2484	-0.75568	-0.67483
						244	-0.39066	-0.3423	-2.2319	-0.89548	-0.98161	-1.5264	-1.0364	-0.91016
						243	-0.36865	-0.51871	-2.4135	-0.97106	-1.1665	-1.7513	-1.3229	-1.1516
						242	-0.21957	-0.57924	-2.5567	-1.1306	-1.4298	-1.9214	-1.6565	-1.4128
						241	-0.050469	-0.57638	-2.7274	-1.3113	-1.7479	-2.0689	-2.0624	-1.7258
						240	0.018125	-0.59503	-3.0528	-1.5447	-2.1514	-2.2646	-2.4888	-2.0969
						239	0.14084	-0.51993	-3.3261	-1.7801	-2.6211	-2.5653	-2.9477	-2.5235
						238	0.25344	-0.3538	-3.6192	-2.0713	-3.1532	-3.0191	-3.4246	-2.9464
						237	0.23117	-0.34494	-4.0239	-2.401	-3.7433	-3.6307	-3.8871	-3.4194
						236	0.13433	-0.45251	-4.4628	-2.7313	-4.3417	-4.3856	-4.4097	-3.94
						235	-0.17526	-0.65608	-5.0888	-3.045	-4.9066	-5.2707	-5.0301	-4.5633
						234	-0.4114	-0.90651	-5.7746	-3.3806	-5.4719	-6.2695	-5.7866	-5.3191
						233	-0.65471	-1.124	-6.4154	-3.7569	-6.099	-7.3426	-6.6845	-6.1359
						232	-0.72224	-1.2484	-6.942	-4.1593	-6.7617	-8.4461	-7.6327	-7.0505
						231	-0.78797	-1.2631	-7.4082	-4.5413	-7.3786	-9.5578	-8.6768	-8.0868
						230	-0.72143	-1.1016	-7.8338	-4.8995	-7.9755	-10.672	-9.7373	-9.1019
						229	-0.59679	-0.84423	-8.2113	-5.2792	-8.5773	-11.761	-10.843	-10.148
						228	-0.4552	-0.5992	-8.7202	-5.6692	-9.2075	-12.785	-11.848	-11.166
						227	-0.54798	-0.61334	-9.2195	-6.04	-9.8368	-13.702	-12.703	-12.17
						226	-0.69941	-0.86934	-9.6877	-6.4101	-10.366	-14.509	-13.439	-13.031
						225	-0.9616	-1.2544	-10.071	-6.7235	-10.796	-15.209	-14.004	-13.799
						224	-1.1135	-1.6194	-10.251	-7.0354	-11.179	-15.794	-14.533	-14.403
						223	-1.3066	-1.9602	-10.299	-7.3628	-11.474	-16.214	-14.971	-14.865
						222	-1.4229	-2.2441	-10.162	-7.6017	-11.628	-16.417	-15.257	-15.184
						221	-1.5096	-2.3771	-9.8108	-7.7656	-11.686	-16.382	-15.305	-15.241
						220	-1.4153	-2.2555	-9.1599	-7.7458	-11.505	-16.114	-15.133	-15.02
						219	-1.3478	-2.1022	-8.4473	-7.6806	-11.109	-15.597	-14.644	-14.56
						218	-1.3161	-1.9465	-7.8254	-7.4726	-10.612	-14.833	-13.828	-13.741
						217	-1.5717	-1.9947	-7.3211	-7.1239	-9.9526	-13.848	-12.678	-12.573
						216	-1.8527	-2.149	-6.8901	-6.6894	-9.0815	-12.665	-11.186	-11.119
						215	-2.1597	-2.4018	-6.4784	-6.2288	-8.0471	-11.236	-9.5024	-9.3586
						214	-2.5052	-2.79	-6.3244	-5.8722	-7.0173	-9.4951	-7.5926	-7.394
						213	-2.9652	-3.5357	-6.4787	-5.3702	-5.9896	-7.3837	-5.5028	-5.2504
						212	-3.336	-4.2961	-6.5886	-4.7583	-4.9403	-4.9273	-3.1995	-2.98
						211	-3.8282	-4.9471	-6.5229	-3.9951	-3.8881	-2.2065	-0.93127	-0.51485
						210	-4.2678	-5.5023	-6.2302	-3.3936	-2.8984	0.68818	1.5083	1.7623
						209	-5.0234	-6.2854	-6.1345	-2.7733	-2.0584	3.6314	3.7566	4.1368
						208	-5.9462	-7.153	-6.1299	-2.1886	-1.3541	6.434	5.8162	6.2508
						207	-7.1389	-8.1158	-6.6361	-1.5975	-0.77799	8.9047	7.6139	7.9748
						206	-8.2584	-8.8652	-7.0908	-1.1014	-0.43347	10.942	9.1877	9.3438
						205	-9.1679	-9.5176	-7.634	-0.72738	-0.33877	12.479	10.455	10.361
						204	-10.505	-10.843	-8.9301	-0.46249	-0.4841	13.449	11.472	11.063
						203	-11.461	-11.852	-9.9126	-0.3109	-0.80854	13.726	12.206	11.372
						202	-12.807	-13.231	-11.527	-0.23164	-1.23	13.237	12.592	11.348
						201	-14.53	-14.818	-13.507	-0.21462	-1.7947	12.24	12.682	11.023
						200	-16.322	-16.557	-15.629	-0.26578	-2.4989	11.02	12.463	10.513
						199	-18.21	-18.408	-17.855	-0.34251	-3.2314	9.8062	12.044	9.8777
						198	-19.835	-20.067	-19.8	-0.36742	-3.9554	8.7666	11.522	9.1735

## Sheet: Fig 2-fig sup 1b PRL
								PRL
						Wavelength (nm)	0d	3d	5d	7d	9d	12d	15d	20d
						260	0	0	0	0	0	0	0	0
						259	-0.014997	0.0065085	0.023738	-0.016241	-0.0028394	-0.011451	-0.0020821	-0.0029552
						258	-0.021768	0.021633	0.052503	-0.026815	0.0023968	-0.012869	-0.00075354	-0.0059644
						257	-0.034282	0.032666	0.060171	-0.047922	0.0021634	-0.026726	-0.015943	-0.011186
						256	-0.054393	0.029155	0.053951	-0.078304	-0.016202	-0.054767	-0.034656	-0.030717
						255	-0.079443	0.012347	0.032752	-0.11721	-0.046243	-0.089807	-0.064796	-0.057484
						254	-0.098427	-0.014498	0.0079358	-0.14431	-0.075013	-0.11742	-0.086666	-0.084716
						253	-0.11092	-0.041552	-0.027429	-0.16725	-0.097275	-0.13748	-0.11267	-0.11783
						252	-0.12177	-0.07642	-0.066691	-0.18277	-0.118	-0.14946	-0.14183	-0.1444
						251	-0.14181	-0.11309	-0.11581	-0.1788	-0.14095	-0.15954	-0.1686	-0.17193
						250	-0.17838	-0.15064	-0.16133	-0.18552	-0.16777	-0.15997	-0.20165	-0.20269
						249	-0.24972	-0.2165	-0.23458	-0.21712	-0.21525	-0.19048	-0.24811	-0.25277
						248	-0.33429	-0.30436	-0.32119	-0.2742	-0.28121	-0.23496	-0.30521	-0.32885
						247	-0.43673	-0.4107	-0.40266	-0.35567	-0.36956	-0.31276	-0.37266	-0.41357
						246	-0.54081	-0.52019	-0.47938	-0.44903	-0.45788	-0.38932	-0.43532	-0.49295
						245	-0.67374	-0.64719	-0.5789	-0.56736	-0.56524	-0.49773	-0.5301	-0.58173
						244	-0.83797	-0.80207	-0.73463	-0.72255	-0.70765	-0.64087	-0.65819	-0.70369
						243	-1.0735	-1.015	-0.96528	-0.94335	-0.91875	-0.85493	-0.84524	-0.87505
						242	-1.3793	-1.3039	-1.2668	-1.243	-1.206	-1.1302	-1.0756	-1.1035
						241	-1.7397	-1.6591	-1.6256	-1.613	-1.545	-1.4584	-1.3529	-1.3743
						240	-2.1642	-2.0901	-2.056	-2.0577	-1.9596	-1.8459	-1.6781	-1.7085
						239	-2.6784	-2.6005	-2.5817	-2.5956	-2.46	-2.3041	-2.0921	-2.1151
						238	-3.277	-3.191	-3.1814	-3.1985	-3.0414	-2.8219	-2.5863	-2.5809
						237	-3.9711	-3.8821	-3.8827	-3.8882	-3.7223	-3.4104	-3.1702	-3.1296
						236	-4.7524	-4.6543	-4.6622	-4.6586	-4.4715	-4.0471	-3.8335	-3.7413
						235	-5.6311	-5.5257	-5.5404	-5.5253	-5.3067	-4.7781	-4.5701	-4.4478
						234	-6.5735	-6.4673	-6.4919	-6.473	-6.2079	-5.5825	-5.3674	-5.2342
						233	-7.5902	-7.4909	-7.5203	-7.4963	-7.1906	-6.461	-6.2202	-6.0849
						232	-8.6384	-8.5486	-8.5725	-8.5617	-8.2157	-7.3636	-7.0939	-6.9606
						231	-9.7234	-9.6453	-9.6572	-9.6623	-9.2752	-8.2971	-7.9979	-7.8658
						230	-10.802	-10.739	-10.746	-10.761	-10.341	-9.2427	-8.8947	-8.7779
						229	-11.855	-11.811	-11.798	-11.836	-11.385	-10.178	-9.7532	-9.6668
						228	-12.83	-12.819	-12.801	-12.853	-12.369	-11.056	-10.541	-10.504
						227	-13.697	-13.727	-13.691	-13.765	-13.261	-11.849	-11.235	-11.258
						226	-14.47	-14.51	-14.479	-14.567	-14.069	-12.547	-11.856	-11.918
						225	-15.12	-15.145	-15.113	-15.219	-14.731	-13.115	-12.382	-12.466
						224	-15.611	-15.618	-15.583	-15.705	-15.221	-13.52	-12.792	-12.891
						223	-15.955	-15.937	-15.916	-16.047	-15.546	-13.779	-13.094	-13.202
						222	-16.152	-16.104	-16.106	-16.219	-15.698	-13.903	-13.272	-13.375
						221	-16.229	-16.161	-16.188	-16.287	-15.739	-13.938	-13.354	-13.46
						220	-16.191	-16.095	-16.153	-16.243	-15.662	-13.858	-13.338	-13.438
						219	-16.091	-15.976	-16.053	-16.137	-15.543	-13.719	-13.266	-13.354
						218	-15.923	-15.788	-15.881	-15.976	-15.387	-13.532	-13.132	-13.213
						217	-15.773	-15.634	-15.734	-15.814	-15.226	-13.376	-13.012	-13.077
						216	-15.651	-15.513	-15.619	-15.71	-15.111	-13.279	-12.923	-12.992
						215	-15.613	-15.481	-15.592	-15.706	-15.099	-13.289	-12.932	-13.002
						214	-15.673	-15.565	-15.682	-15.811	-15.222	-13.401	-13.028	-13.114
						213	-15.855	-15.75	-15.876	-15.99	-15.457	-13.601	-13.203	-13.302
						212	-16.11	-16.005	-16.139	-16.248	-15.739	-13.881	-13.447	-13.524
						211	-16.373	-16.242	-16.388	-16.5	-15.979	-14.128	-13.672	-13.725
						210	-16.504	-16.413	-16.562	-16.708	-16.118	-14.256	-13.864	-13.86
						209	-16.423	-16.384	-16.51	-16.713	-16.025	-14.188	-13.858	-13.819
						208	-15.998	-16.05	-16.139	-16.38	-15.621	-13.807	-13.537	-13.525
						207	-15.196	-15.283	-15.351	-15.625	-14.797	-13.108	-12.847	-12.905
						206	-13.9	-13.976	-14.079	-14.311	-13.533	-11.949	-11.729	-11.861
						205	-11.963	-12.054	-12.27	-12.358	-11.695	-10.277	-10.146	-10.302
						204	-9.0832	-9.1388	-9.4495	-9.4392	-8.9345	-7.795	-7.7754	-7.9246
						203	-5.5901	-5.5792	-5.9477	-5.8839	-5.5517	-4.7884	-4.9	-5.0018
						202	-1.7679	-1.6516	-2.0522	-2.015	-1.8617	-1.5102	-1.7623	-1.8
						201	2.0837	2.3214	1.9122	1.8929	1.8472	1.7778	1.385	1.4417
						200	5.7266	6.0907	5.7024	5.6045	5.3536	4.8906	4.384	4.5422
						199	8.9568	9.4598	9.0953	8.9269	8.4867	7.6554	7.0584	7.3382
						198	11.645	12.265	11.948	11.665	11.113	9.9388	9.276	9.7029

## Sheet: Fig 2-fig sup 1b PRL+CSA
								PRL-CSA
						Wavelength (nm)	0d	3d	5d	7d	9d	12d	15d	20d
						260	0	0	0	0	0	0	0	0
						259	0.019847	-0.0085062	-0.0025869	0.014836	0.023422	0.013361	0.0043696	-0.019076
						258	0.032145	-0.018217	-0.010671	0.019059	0.045096	0.035715	0.0034688	-0.042188
						257	0.042615	-0.023606	-0.018878	0.0091845	0.071182	0.062598	-0.0015949	-0.05548
						256	0.045384	-0.010148	-0.035135	-0.002494	0.094031	0.08094	-0.0074187	-0.053385
						255	0.02777	-0.001514	-0.046049	-0.0117	0.10301	0.079908	-0.035503	-0.057702
						254	-0.013206	-0.00016347	-0.067667	-0.022774	0.10665	0.071202	-0.060781	-0.056181
						253	-0.053097	-0.0014622	-0.090042	-0.033002	0.081563	0.074005	-0.051567	-0.042483
						252	-0.11418	-0.021641	-0.12087	-0.034823	0.042494	0.065214	-0.040322	-0.041455
						251	-0.17202	-0.072333	-0.16713	-0.04513	-0.00076823	0.051494	-0.014204	-0.04479
						250	-0.23029	-0.13128	-0.22448	-0.044535	-0.045769	0.031723	0.010269	-0.05619
						249	-0.28425	-0.2001	-0.26675	-0.065525	-0.095667	0.020325	0.02831	-0.059345
						248	-0.34528	-0.2645	-0.3212	-0.12142	-0.15893	-0.0020502	0.034717	-0.073554
						247	-0.40945	-0.32911	-0.38054	-0.21053	-0.23103	-0.057687	0.0027701	-0.10853
						246	-0.4817	-0.38987	-0.45771	-0.31776	-0.32118	-0.16013	-0.070914	-0.17343
						245	-0.58232	-0.50339	-0.56996	-0.45787	-0.45481	-0.29033	-0.1906	-0.27643
						244	-0.73759	-0.66203	-0.73058	-0.64602	-0.61322	-0.44337	-0.34539	-0.40592
						243	-0.93902	-0.87654	-0.94321	-0.86083	-0.80432	-0.63078	-0.53202	-0.57462
						242	-1.2126	-1.1513	-1.2065	-1.1196	-1.0201	-0.86627	-0.7684	-0.78396
						241	-1.5473	-1.5114	-1.5462	-1.4414	-1.3084	-1.16	-1.0253	-1.0381
						240	-1.9648	-1.9491	-1.9724	-1.8398	-1.6561	-1.5068	-1.3166	-1.3369
						239	-2.4391	-2.4636	-2.4565	-2.3267	-2.078	-1.8916	-1.6268	-1.6595
						238	-3.0121	-3.0764	-3.0492	-2.9243	-2.5782	-2.3353	-2.0103	-2.0422
						237	-3.6654	-3.7709	-3.7397	-3.6172	-3.2052	-2.8819	-2.4849	-2.5106
						236	-4.4035	-4.5328	-4.5166	-4.3982	-3.9109	-3.4807	-3.0049	-3.0223
						235	-5.2379	-5.3799	-5.3955	-5.2697	-4.7182	-4.1356	-3.5831	-3.5773
						234	-6.1835	-6.3192	-6.3491	-6.2202	-5.6044	-4.838	-4.2218	-4.1852
						233	-7.2082	-7.3347	-7.3796	-7.2229	-6.5381	-5.6167	-4.9232	-4.8606
						232	-8.2893	-8.3909	-8.4409	-8.2647	-7.5035	-6.4329	-5.6468	-5.5921
						231	-9.4154	-9.5051	-9.5502	-9.3433	-8.4784	-7.2755	-6.3855	-6.3607
						230	-10.554	-10.65	-10.675	-10.478	-9.4198	-8.0963	-7.1162	-7.1268
						229	-11.644	-11.796	-11.762	-11.601	-10.299	-8.8775	-7.8166	-7.8577
						228	-12.693	-12.907	-12.811	-12.702	-11.133	-9.6271	-8.513	-8.5425
						227	-13.638	-13.879	-13.755	-13.694	-11.918	-10.327	-9.1296	-9.1482
						226	-14.471	-14.672	-14.611	-14.552	-12.579	-10.909	-9.6334	-9.6242
						225	-15.198	-15.304	-15.309	-15.272	-13.114	-11.404	-10.042	-10.006
						224	-15.744	-15.813	-15.861	-15.827	-13.506	-11.768	-10.331	-10.287
						223	-16.146	-16.206	-16.263	-16.232	-13.762	-12.025	-10.534	-10.487
						222	-16.396	-16.498	-16.533	-16.47	-13.922	-12.133	-10.6	-10.591
						221	-16.548	-16.701	-16.711	-16.583	-13.959	-12.133	-10.591	-10.618
						220	-16.619	-16.821	-16.767	-16.622	-13.905	-12.065	-10.547	-10.591
						219	-16.577	-16.849	-16.723	-16.567	-13.734	-11.969	-10.477	-10.519
						218	-16.49	-16.784	-16.602	-16.427	-13.551	-11.882	-10.396	-10.422
						217	-16.354	-16.63	-16.441	-16.29	-13.369	-11.79	-10.297	-10.327
						216	-16.229	-16.454	-16.315	-16.168	-13.206	-11.703	-10.204	-10.232
						215	-16.183	-16.358	-16.214	-16.155	-13.064	-11.648	-10.157	-10.182
						214	-16.196	-16.389	-16.272	-16.252	-13.011	-11.641	-10.141	-10.179
						213	-16.401	-16.624	-16.477	-16.468	-13.091	-11.733	-10.2	-10.252
						212	-16.733	-16.989	-16.821	-16.741	-13.304	-11.85	-10.277	-10.344
						211	-17.188	-17.457	-17.266	-17.064	-13.55	-12.04	-10.413	-10.465
						210	-17.544	-17.802	-17.645	-17.366	-13.722	-12.198	-10.538	-10.563
						209	-17.666	-17.892	-17.81	-17.449	-13.649	-12.245	-10.565	-10.559
						208	-17.392	-17.613	-17.577	-17.157	-13.328	-12.071	-10.374	-10.371
						207	-16.657	-16.841	-16.912	-16.398	-12.571	-11.451	-9.8306	-9.8247
						206	-15.297	-15.495	-15.687	-15.042	-11.371	-10.355	-8.9038	-8.9001
						205	-13.355	-13.539	-13.958	-13.099	-9.6777	-8.8253	-7.5841	-7.5852
						204	-10.867	-10.953	-11.537	-10.671	-7.5831	-6.8838	-5.8754	-5.9191
						203	-7.6157	-7.7106	-8.1128	-7.5145	-4.9627	-4.5689	-3.7851	-3.8084
						202	-3.5314	-3.6827	-3.5722	-3.5152	-1.4236	-1.4251	-0.97476	-1.0265
						201	0.79123	0.51917	1.3866	0.71541	2.507	2.0006	2.0934	1.9772
						200	4.9629	4.5419	6.2446	4.7081	6.3961	5.3693	5.0882	4.8677
						199	8.5495	7.9627	10.547	8.1646	9.8896	8.3342	7.7179	7.3816
						198	11.335	10.548	13.953	10.85	12.677	10.717	9.8287	9.3598

## Sheet: Fig 2-fig sup 1b PRL+GAL
								PRL-GAL
						Wavelength (nm)	0d	3d	5d	7d	9d	12d	15d	20d
						260	0	0	0	0	0	0	0	0
						259	-0.028086	-0.0070757	0.036184	0.013498	-0.011381	-0.02716	-0.0099776	0.0035128
						258	-0.06251	-0.015045	0.067423	0.012378	-0.015241	-0.04947	-0.011925	-0.0030475
						257	-0.095556	-0.0301	0.081781	0.006533	-0.0066811	-0.055563	-0.018344	-0.020218
						256	-0.11367	-0.036066	0.078391	-0.0036005	-0.0050432	-0.053438	-0.0086198	-0.03636
						255	-0.11895	-0.037403	0.051637	-0.010396	-0.013015	-0.058126	-0.0081075	-0.069136
						254	-0.11209	-0.055986	0.0036055	-0.02781	-0.020267	-0.052401	-0.014657	-0.090673
						253	-0.099029	-0.078352	-0.042699	-0.047401	-0.033713	-0.017682	0.0079776	-0.068812
						252	-0.096067	-0.098699	-0.092483	-0.068762	-0.050061	-0.012214	0.014455	-0.04931
						251	-0.1336	-0.14077	-0.1537	-0.096244	-0.061705	-0.026513	0.0046238	-0.027343
						250	-0.18138	-0.18401	-0.2057	-0.1146	-0.094167	-0.045268	-0.015112	-0.011825
						249	-0.24027	-0.25357	-0.24195	-0.14495	-0.12515	-0.047105	-0.039325	-0.0048525
						248	-0.31491	-0.32851	-0.28266	-0.2008	-0.14875	-0.050496	-0.066477	-0.024011
						247	-0.39611	-0.42007	-0.32628	-0.26507	-0.18037	-0.073252	-0.11638	-0.076274
						246	-0.47165	-0.51184	-0.39532	-0.34413	-0.24963	-0.14114	-0.18643	-0.1569
						245	-0.58009	-0.63276	-0.51988	-0.43423	-0.35515	-0.25569	-0.28014	-0.26683
						244	-0.72674	-0.79772	-0.69168	-0.56192	-0.49342	-0.39492	-0.38416	-0.38412
						243	-0.93549	-0.99666	-0.9163	-0.73523	-0.65148	-0.54866	-0.50108	-0.51641
						242	-1.2198	-1.2522	-1.1855	-0.96109	-0.85159	-0.73574	-0.63607	-0.67643
						241	-1.5827	-1.5889	-1.5386	-1.2498	-1.1246	-0.94109	-0.80331	-0.86616
						240	-2.0012	-2.0091	-1.9733	-1.6012	-1.4699	-1.168	-0.99135	-1.0676
						239	-2.4788	-2.4802	-2.473	-2.0036	-1.8746	-1.4087	-1.2055	-1.2914
						238	-3.0687	-3.056	-3.0777	-2.494	-2.3066	-1.7006	-1.481	-1.554
						237	-3.7471	-3.7365	-3.7597	-3.0512	-2.8269	-2.071	-1.8504	-1.8966
						236	-4.4941	-4.5029	-4.5263	-3.6707	-3.3866	-2.4945	-2.2856	-2.2997
						235	-5.351	-5.3705	-5.3766	-4.3489	-4.0112	-2.9543	-2.7666	-2.7602
						234	-6.3011	-6.3201	-6.2966	-5.1004	-4.7074	-3.4616	-3.2819	-3.2727
						233	-7.3661	-7.3482	-7.3065	-5.9236	-5.4354	-4.0107	-3.8442	-3.831
						232	-8.4705	-8.4281	-8.36	-6.7818	-6.2349	-4.5917	-4.423	-4.4107
						231	-9.5953	-9.5669	-9.4882	-7.693	-7.0391	-5.1991	-5.0158	-5.0227
						230	-10.725	-10.726	-10.661	-8.6297	-7.8048	-5.8087	-5.5813	-5.6067
						229	-11.818	-11.838	-11.817	-9.5545	-8.5021	-6.4004	-6.1129	-6.168
						228	-12.904	-12.936	-12.937	-10.473	-9.16	-6.9809	-6.6364	-6.6905
						227	-13.867	-13.918	-13.944	-11.294	-9.7997	-7.5136	-7.121	-7.1791
						226	-14.703	-14.777	-14.825	-12.004	-10.355	-7.9413	-7.5232	-7.5879
						225	-15.389	-15.497	-15.547	-12.612	-10.843	-8.2747	-7.8382	-7.9209
						224	-15.941	-16.078	-16.112	-13.066	-11.235	-8.518	-8.0582	-8.1422
						223	-16.345	-16.503	-16.518	-13.397	-11.511	-8.6713	-8.2177	-8.279
						222	-16.58	-16.736	-16.759	-13.598	-11.692	-8.7309	-8.2838	-8.3129
						221	-16.675	-16.825	-16.887	-13.74	-11.739	-8.7019	-8.2639	-8.293
						220	-16.688	-16.803	-16.895	-13.819	-11.684	-8.6335	-8.1966	-8.2271
						219	-16.614	-16.662	-16.808	-13.83	-11.539	-8.5312	-8.0969	-8.1494
						218	-16.504	-16.453	-16.658	-13.76	-11.392	-8.4482	-8.0208	-8.072
						217	-16.364	-16.23	-16.438	-13.654	-11.255	-8.373	-7.9519	-8.0226
						216	-16.273	-16.101	-16.268	-13.582	-11.142	-8.3014	-7.9023	-7.9717
						215	-16.244	-16.103	-16.213	-13.595	-11.068	-8.28	-7.8619	-7.9682
						214	-16.377	-16.27	-16.316	-13.642	-11.086	-8.3001	-7.8548	-7.9773
						213	-16.636	-16.602	-16.558	-13.829	-11.239	-8.3906	-7.9173	-8.04
						212	-17.01	-17.038	-16.893	-14.085	-11.481	-8.4756	-7.9764	-8.0657
						211	-17.426	-17.585	-17.308	-14.465	-11.736	-8.6019	-8.082	-8.113
						210	-17.753	-17.995	-17.65	-14.775	-11.899	-8.7674	-8.1931	-8.1628
						209	-17.829	-18.137	-17.799	-14.908	-11.865	-8.8445	-8.2317	-8.1385
						208	-17.542	-17.833	-17.564	-14.719	-11.577	-8.7623	-8.126	-7.9793
						207	-16.802	-17.004	-16.811	-14.19	-10.896	-8.3246	-7.7057	-7.545
						206	-15.479	-15.593	-15.553	-13.17	-9.8222	-7.5605	-6.9797	-6.886
						205	-13.616	-13.496	-13.633	-11.608	-8.3318	-6.4772	-5.95	-5.9604
						204	-11.094	-10.877	-11.058	-9.4293	-6.4878	-5.1296	-4.5901	-4.6977
						203	-7.9346	-7.6701	-7.5057	-6.5906	-4.2565	-3.3494	-2.9773	-2.9892
						202	-3.9107	-3.5797	-3.2424	-2.8928	-1.2912	-0.99384	-0.85368	-0.6963
						201	0.399	0.76237	1.1141	1.0603	1.9784	1.5025	1.3995	1.7697
						200	4.5585	4.9802	5.1505	4.8976	5.1833	3.8777	3.5561	4.1443
						199	8.1714	8.6334	8.4952	8.2191	8.017	5.9559	5.4283	6.2336
						198	10.958	11.52	10.94	10.789	10.26	7.6069	6.9179	7.8776

## Sheet: Fig 2-fig sup 1c
						PRL-CSA		PRL-GAL		PRL
					Time (d)	Mean	StdErr	Mean	StdErr	Mean	StdErr
					0	-15.4361	0.97615	-15.5554	0.97157	-16.1422	0.0303
					3	-15.5971	0.91814	-15.682	0.9582	-16.1695	0.05034
					5	-15.5806	0.95586	-15.6235	1.04816	-16.1353	0.02802
					7	-15.5584	0.98838	-12.4759	0.60187	-16.2323	0.00954
					9	-12.3145	0.80623	-10.441	0.62587	-14.8666	0.41592
					10	-11.5167	0.51077	-8.61977	0.49644	-14.4507	0.02508
					12	-10.5797	0.77714	-7.52106	0.60499	-13.443	0.23002
					15	-9.20452	0.70406	-7.43637	0.42424	-13.3382	0.03325
					20	-9.13846	0.72624	-7.29075	0.51122	-13.33	0.02381
						GAL-Hep		GAL
					Time (d)	Mean	StdErr	Mean	StdErr
					0	-0.70133	0.445	-1.97977	0.31171
					3	-1.05468	0.60276	-1.67171	0.29131
					7	-5.70558	0.98774	-2.07413	0.56521
					9	-8.46234	1.07507	-1.96189	0.35217
					10	-12.7388	1.16584	-1.77199	0.15406
					12	-13.615	0.67357	-2.30239	0.19316
					15	-13.8645	0.72353	-2.10112	0.22649
					20	-13.445	0.45643	-2.34147	0.07798

## Sheet: Fig 2-fig sup 1d
						ThT
							PRL+CSA	Set1	Set2	Set3							p value
							Day 0	218.797	242.606	244.702		235.368	14.3894	8.30797		***	0.0001
							Day 15	909.632	995.196	990.082		964.97	47.9923	27.7092
							PRL+GAL
							Day 0	264.122	277.453	286.036		275.87	11.0424	6.37552		***	0.0001
							Day 15	1067.07	1166.62	1222.11		1151.93	78.5565	45.3559
							GAL+Hep
							Day 0	288.995	279.391	261.46		276.615	13.9758	8.06915		***	0.0001
							Day 15	1028.25	1078.59	1093.2		1066.68	34.0736	19.673
							PRL
							Day 0	231.33	231.464	236.192		232.995	2.76921	1.59885		ns	0.556
							Day 15	220.613	301.017	227.035		249.555	44.6829	25.7985
							GAL
							Day 0	246.764	225.253	224.016		232.011	12.7914	7.38535		ns	0.571
							Day 15	223.338	292.727	293.751		269.939	40.3606	23.3029

## Sheet: Fig 2-fig sup 1e
					Lag time (days)
							Set 1	Set 2	Set 3		Mean	Stdev	Stderr				p value
					1	PRL+CSA	9.59	9.2	9.06		9.28333	0.274651	0.158575		1 to 2	ns	0.19
					2	PRL+GAL	9.28	8.75	8.538		8.856	0.382188	0.220663		2 to 3	*	0.011
					3	GAL+Hep	7.63	6.36	6.72		6.90333	0.654548	0.377915		1 to 3	**	0.004

## Sheet: Fig 2-fig sup 1f left panel
							Fibril diameter (nm)
							PRL-CSA	GAL-Hep	PRL-GAL
							8.1617	13.5746	11.6708
							6.6515	10.8136	10.6043
							8.1659	13.3411	10.479
							7.2819	11.0471	8.4675
							6.6237	12.5495	9.7202
							7.6168	10.4484	8.4791
							8.5151	13.1506	10.734
							6.6897	6.5066	9.8975
							6.9419	13.0828	9.0685
							5.8866	10.7674	12.1382
							7.3318	11.8559	9.1192
							9.9023	12.6853	9.7147
							6.115	12.5017	10.373
							5.0535	9.8086	10.526
							5.9185	10.5969	8.4411
							9.0503	12.2894	9.9225
							6.8623	13.5166	10.4863
							6.4271	14.8622	9.4759
							7.2457	9.5307	10.9391
							7.4349	11.1573	9.9998
							6.2949	14.4432	11.8234
							6.1822	10.674	10.6531
							5.9084	13.1528	12.3102
							7.5536	15.6496	10.9587
							6.2441	15.4711	9.8699
							6.3597	11.4915	9.5291
							7.1831	11.8084	9.3079
							6.1834	13.247	9.8233
							7.0703	12.4193	9.799
							7.2652	13.1314	9.803
							6.9269	9.7332	10.4696
							6.5857	10.3224	8.9002
							7.784	10.4414	9.2797
							7.0325	13.1147	8.8915
							6.4143	11.9304	10.3015
							8.2343	10.6042	9.8838
							6.9059	11.1758	10.1559
							6.478	10.0862	10.0482
							7.6098	11.6858	10.4644
							6.4345	13.3627	9.7615
							6.9044	8.9002	11.1737
							7.4689	9.9952	9.804
							6.6966	11.3299	10.9394
							8.5601	6.0122	8.3121
							9.1348	15.2936	8.7062
							7.7372	15.4755	9.3001
							5.3253	9.4937	10.0038
							7.8227	11.7375	11.1659
							7.5725	11.6615	10.3153
							8.8392	12.6666	11.5887

## Sheet: Fig 2-fig sup 1f right panel
						Fibril diameter (nm)
						PRL-CSA	GAL-Hep	PRL-GAL
						8.1617	13.5746	11.6708
						6.6515	10.8136	10.6043			PRL-CSA	GAL-Hep	PRL-GAL
						8.1659	13.3411	10.479		Mean	7.13177	11.8119	10.072
						7.2819	11.0471	8.4675		Std Error	0.140516	0.288555	0.135027
						6.6237	12.5495	9.7202
						7.6168	10.4484	8.4791
						8.5151	13.1506	10.734
						6.6897	6.5066	9.8975			PRL-CSA to GAL-Hep		PRL-CSA to PRL-GAL
						6.9419	13.0828	9.0685		p value	0.0001		0.0001
						5.8866	10.7674	12.1382			***		***
						7.3318	11.8559	9.1192
						9.9023	12.6853	9.7147
						6.115	12.5017	10.373
						5.0535	9.8086	10.526
						5.9185	10.5969	8.4411
						9.0503	12.2894	9.9225
						6.8623	13.5166	10.4863
						6.4271	14.8622	9.4759
						7.2457	9.5307	10.9391
						7.4349	11.1573	9.9998
						6.2949	14.4432	11.8234
						6.1822	10.674	10.6531
						5.9084	13.1528	12.3102
						7.5536	15.6496	10.9587
						6.2441	15.4711	9.8699
						6.3597	11.4915	9.5291
						7.1831	11.8084	9.3079
						6.1834	13.247	9.8233
						7.0703	12.4193	9.799
						7.2652	13.1314	9.803
						6.9269	9.7332	10.4696
						6.5857	10.3224	8.9002
						7.784	10.4414	9.2797
						7.0325	13.1147	8.8915
						6.4143	11.9304	10.3015
						8.2343	10.6042	9.8838
						6.9059	11.1758	10.1559
						6.478	10.0862	10.0482
						7.6098	11.6858	10.4644
						6.4345	13.3627	9.7615
						6.9044	8.9002	11.1737
						7.4689	9.9952	9.804
						6.6966	11.3299	10.9394
						8.5601	6.0122	8.3121
						9.1348	15.2936	8.7062
						7.7372	15.4755	9.3001
						5.3253	9.4937	10.0038
						7.8227	11.7375	11.1659
						7.5725	11.6615	10.3153
						8.8392	12.6666	11.5887
