# Supplementary material for: Co-aggregation and secondary nucleation in the life cycle of human prolactin/galanin functional amyloids
Source: eLife. 2022 Mar 8;11:e73835. doi: 10.7554/eLife.73835 (PMC8993219; doi:10.7554/eLife.73835)
Supplement: Figure 2—figure supplement 2—source data 1. [file elife-73835-fig2-figsupp2-data1.xlsx]

## Sheet: Fig 2-fig sup 2b
	CR		PRL 400 μM		PRL 400 μM+CSA 400 μM		GAL 400 μM		GAL 400 μM+Hep 400 μM		PRL 400 μM+GAL 400 μM		PRL 800 μM		GAL 800 μM
Set 1	0.030502		0.15697		0.26685		0.12661		0.420311		0.310998		0.117712		0.0992252
Set 2	0.0314356		0.144542		0.291869		0.116521		0.38044		0.290536		0.142976		0.0898266
Set 3	0.028744		0.15419		0.281971		0.128		0.401		0.32		0.0837372		0.115611
Mean	0.0302272		0.151901		0.28023		0.12371		0.400584		0.307178		0.114808		0.101554
StdEv	0.00136668		0.00652262		0.0125999		0.00626482		0.0199389		0.0150986		0.0297259		0.013049
StdErr	0.000789076		0.00376595		0.00727476		0.0036171		0.0115121		0.00871744		0.0171628		0.00753408
		CR to PRL			CR to PRL-CSA		CR to GAL		CR to GAL-Hep		CR to PRL-GAL
		***			***		***		***		***
	p value	0.0001			0.0001		0.0001		0.0001		0.0001
				PRL 400 mM to PRL-CSA		GAL 400 mM to GAL-Hep		PRL 400 mM to PRL-GAL		GAL 400 mM to PRL-GAL
				***		***		***		***
				0.0001		0.0001		0.0001		0.0001
				PRL 800 mM to PRL-CSA		GAL 800 mM to GAL-Hep		PRL 800 mM to PRL-GAL		GAL 800 mM to PRL-GAL
				***		***		***		***
				0.0001		0.0001		0.0001		0.0001
