# Supplementary material for: Co-aggregation and secondary nucleation in the life cycle of human prolactin/galanin functional amyloids
Source: eLife. 2022 Mar 8;11:e73835. doi: 10.7554/eLife.73835 (PMC8993219; doi:10.7554/eLife.73835)
Supplement: Figure 2—figure supplement 3—source data 1. [file elife-73835-fig2-figsupp3-data1.xlsx]

## Sheet: Fig 2-fig sup3b  GAL day 0
					GAL day 0
			Wavelength (cm^-1)
			1699.2	0.00015	0	0	8e-05	7e-05
			1697.3	0.00018	0	0	9e-05	9e-05
			1695.3	0.00022	0	0	0.0001	0.00012
			1693.4	0.00027	0	0	0.00011	0.00016
			1691.5	0.00036	0	0	0.00012	0.00024
			1689.6	0.00051	0	0	0.00013	0.00038
			1687.6	0.00084	0	0	0.00014	0.00069
			1685.7	0.0016	0	0	0.00016	0.00144
			1683.8	0.00301	0	0	0.00018	0.00283
			1681.8	0.00254	0	0	0.0002	0.00234
			1679.9	0.00132	0	0	0.00022	0.00109
			1678	0.00081	0	0	0.00025	0.00055
			1676	0.00062	0	0	0.00029	0.00032
			1674.1	0.00055	0	0	0.00034	0.00021
			1672.2	0.00055	0	0	0.0004	0.00014
			1670.3	0.00059	0	0	0.00048	0.0001
			1668.3	0.00066	0	0	0.00058	8e-05
			1666.4	0.00078	0	0	0.00072	6e-05
			1664.5	0.00096	0	0	0.00091	5e-05
			1662.5	0.00122	0	1e-05	0.00118	4e-05
			1660.6	0.00162	0	1e-05	0.00158	4e-05
			1658.7	0.00225	0	1e-05	0.00221	3e-05
			1656.8	0.00327	0	1e-05	0.00324	3e-05
			1654.8	0.00497	0	1e-05	0.00493	2e-05
			1652.9	0.00751	0	1e-05	0.00748	2e-05
			1651	0.00986	0	2e-05	0.00983	2e-05
			1649	0.00939	0	2e-05	0.00936	2e-05
			1647.1	0.00675	0	3e-05	0.00671	1e-05
			1645.2	0.00443	0	4e-05	0.00438	1e-05
			1643.3	0.00296	0	5e-05	0.0029	1e-05
			1641.3	0.0021	0	8e-05	0.00201	1e-05
			1639.4	0.00161	0	0.00015	0.00145	1e-05
			1637.5	0.00144	0	0.00034	0.00109	1e-05
			1635.5	0.00173	0	0.00088	0.00085	1e-05
			1633.6	0.00165	0	0.00097	0.00067	1e-05
			1631.7	0.00093	0	0.00037	0.00055	1e-05
			1629.8	0.00063	0	0.00017	0.00045	1e-05
			1627.8	0.00048	0	9e-05	0.00038	1e-05
			1625.9	0.00039	0	6e-05	0.00033	1e-05
			1624	0.00032	0	4e-05	0.00028	1e-05
			1622	0.00028	0	3e-05	0.00025	0
			1620.1	0.00024	0	2e-05	0.00022	0
			1618.2	0.00021	0	2e-05	0.00019	0
			1616.3	0.00019	0	1e-05	0.00017	0
			1614.3	0.00017	0	1e-05	0.00015	0
			1612.4	0.00015	0	1e-05	0.00014	0
			1610.5	0.00014	0	1e-05	0.00013	0
			1608.5	0.00012	0	1e-05	0.00011	0
			1606.6	0.00011	0	1e-05	0.0001	0
			1604.7	0.0001	0	0	0.0001	0
			1602.8	0.0001	0	0	9e-05	0
			1600.8	9e-05	0	0	8e-05	0

## Sheet: Fig 2-fig sup3b GAL day 15
										GAL day 15
							Wavelength (cm^-1)
							1699.2	0.00035	1e-05	1e-05	8e-05	1e-05	5e-05	0.0002
							1697.3	0.00068	1e-05	1e-05	9e-05	1e-05	6e-05	0.00051
							1695.3	0.00069	1e-05	1e-05	0.0001	1e-05	8e-05	0.00049
							1693.4	0.00043	1e-05	1e-05	0.00011	1e-05	0.00011	0.00019
							1691.5	0.00039	1e-05	1e-05	0.00012	2e-05	0.00016	8e-05
							1689.6	0.00047	1e-05	1e-05	0.00013	2e-05	0.00025	5e-05
							1687.6	0.00066	1e-05	1e-05	0.00014	3e-05	0.00044	3e-05
							1685.7	0.00109	1e-05	1e-05	0.00016	3e-05	0.00085	2e-05
							1683.8	0.00175	1e-05	1e-05	0.00018	4e-05	0.00149	1e-05
							1681.8	0.00158	1e-05	1e-05	0.0002	6e-05	0.00129	1e-05
							1679.9	0.00102	1e-05	2e-05	0.00023	8e-05	0.00067	1e-05
							1678	0.00078	1e-05	2e-05	0.00026	0.00013	0.00036	1e-05
							1676.1	0.00077	1e-05	2e-05	0.0003	0.00022	0.00021	1e-05
							1674.1	0.00091	1e-05	2e-05	0.00035	0.00038	0.00014	0
							1672.2	0.00116	1e-05	2e-05	0.00042	0.00061	0.0001	0
							1670.3	0.00118	2e-05	3e-05	0.0005	0.00057	7e-05	0
							1668.3	0.00106	2e-05	3e-05	0.00061	0.00034	5e-05	0
							1666.4	0.00106	2e-05	3e-05	0.00077	0.00019	4e-05	0
							1664.5	0.00119	2e-05	4e-05	0.00098	0.00012	3e-05	0
							1662.6	0.00147	2e-05	4e-05	0.0013	8e-05	3e-05	0
							1660.6	0.00193	2e-05	5e-05	0.00177	5e-05	2e-05	0
							1658.7	0.00268	3e-05	6e-05	0.00253	4e-05	2e-05	0
							1656.8	0.0039	3e-05	7e-05	0.00375	3e-05	2e-05	0
							1654.8	0.0058	3e-05	8e-05	0.00564	2e-05	2e-05	0
							1652.9	0.00802	4e-05	0.0001	0.00785	2e-05	1e-05	0
							1651	0.00874	4e-05	0.00012	0.00855	2e-05	1e-05	0
							1649.1	0.00707	4e-05	0.00016	0.00684	1e-05	1e-05	0
							1647.1	0.00493	5e-05	0.00021	0.00465	1e-05	1e-05	0
							1645.2	0.00345	6e-05	0.00028	0.0031	1e-05	1e-05	0
							1643.3	0.00261	7e-05	0.0004	0.00212	1e-05	1e-05	0
							1641.3	0.0022	8e-05	0.00059	0.00152	1e-05	1e-05	0
							1639.4	0.00215	9e-05	0.00091	0.00113	1e-05	1e-05	0
							1637.5	0.00235	0.00011	0.00136	0.00087	1e-05	1e-05	0
							1635.5	0.00249	0.00013	0.00166	0.00069	1e-05	1e-05	0
							1633.6	0.00216	0.00017	0.00143	0.00055	0	1e-05	0
							1631.7	0.00165	0.00021	0.00097	0.00046	0	0	0
							1629.8	0.0013	0.00028	0.00063	0.00038	0	0	0
							1627.8	0.00114	0.00038	0.00042	0.00033	0	0	0
							1625.9	0.00113	0.00055	0.00029	0.00028	0	0	0
							1624	0.00129	0.00082	0.00022	0.00024	0	0	0
							1622	0.00168	0.0013	0.00016	0.00021	0	0	0
							1620.1	0.00236	0.00203	0.00013	0.00019	0	0	0
							1618.2	0.00289	0.00262	0.0001	0.00017	0	0	0
							1616.3	0.0025	0.00226	8e-05	0.00015	0	0	0
							1614.3	0.0017	0.00149	7e-05	0.00013	0	0	0
							1612.4	0.00112	0.00094	6e-05	0.00012	0	0	0
							1610.5	0.00078	0.00061	5e-05	0.00011	0	0	0
							1608.5	0.00057	0.00042	4e-05	0.0001	0	0	0
							1606.6	0.00044	0.00031	4e-05	9e-05	0	0	0
							1604.7	0.00035	0.00023	3e-05	9e-05	0	0	0
							1602.8	0.00029	0.00018	3e-05	8e-05	0	0	0
							1600.8	0.00025	0.00014	3e-05	7e-05	0	0	0

## Sheet: Fig 2-fig sup3b GAL-Hep d0
									GAL-Hep day 0
							Wavelength (cm^-1)
							1699.2	0.00024	0	6e-05	0	0.00018
							1697.3	0.00029	0	6e-05	0	0.00022
							1695.3	0.00036	0	7e-05	0	0.00029
							1693.4	0.00047	1e-05	8e-05	0	0.00038
							1691.5	0.00063	1e-05	8e-05	0	0.00054
							1689.6	0.00089	1e-05	9e-05	1e-05	0.00079
							1687.6	0.00136	1e-05	0.0001	1e-05	0.00125
							1685.7	0.00219	1e-05	0.00011	1e-05	0.00207
							1683.8	0.00339	1e-05	0.00012	1e-05	0.00325
							1681.8	0.00381	1e-05	0.00014	2e-05	0.00365
							1679.9	0.0028	1e-05	0.00016	2e-05	0.00261
							1678	0.0018	1e-05	0.00018	4e-05	0.00158
							1676	0.00125	1e-05	0.0002	7e-05	0.00097
							1674.1	0.00103	1e-05	0.00024	0.00015	0.00064
							1672.2	0.00111	1e-05	0.00028	0.00038	0.00045
							1670.3	0.00106	1e-05	0.00033	0.00039	0.00033
							1668.3	0.00081	2e-05	0.0004	0.00015	0.00025
							1666.4	0.00077	2e-05	0.00049	7e-05	0.0002
							1664.5	0.00083	2e-05	0.00061	4e-05	0.00016
							1662.5	0.00096	2e-05	0.00079	2e-05	0.00013
							1660.6	0.00119	3e-05	0.00104	2e-05	0.00011
							1658.7	0.00157	3e-05	0.00144	1e-05	9e-05
							1656.8	0.00217	4e-05	0.00205	1e-05	8e-05
							1654.8	0.00316	4e-05	0.00304	1e-05	7e-05
							1652.9	0.00462	5e-05	0.00451	1e-05	6e-05
							1651	0.00615	7e-05	0.00602	0	5e-05
							1649	0.00634	8e-05	0.0062	0	5e-05
							1647.1	0.00497	0.00011	0.00482	0	4e-05
							1645.2	0.00347	0.00015	0.00328	0	4e-05
							1643.3	0.00246	0.00022	0.0022	0	3e-05
							1641.3	0.0019	0.00034	0.00153	0	3e-05
							1639.4	0.0017	0.00057	0.00111	0	3e-05
							1637.5	0.00186	0.001	0.00083	0	3e-05
							1635.5	0.00217	0.00151	0.00064	0	2e-05
							1633.6	0.00185	0.00132	0.00051	0	2e-05
							1631.7	0.00122	0.00078	0.00041	0	2e-05
							1629.8	0.00081	0.00045	0.00034	0	2e-05
							1627.8	0.00058	0.00028	0.00029	0	2e-05
							1625.9	0.00045	0.00018	0.00024	0	2e-05
							1624	0.00036	0.00013	0.00021	0	2e-05
							1622	0.00029	0.0001	0.00018	0	1e-05
							1620.1	0.00025	7e-05	0.00016	0	1e-05
							1618.2	0.00021	6e-05	0.00014	0	1e-05
							1616.3	0.00019	5e-05	0.00013	0	1e-05
							1614.3	0.00016	4e-05	0.00011	0	1e-05
							1612.4	0.00015	3e-05	0.0001	0	1e-05
							1610.5	0.00013	3e-05	9e-05	0	1e-05
							1608.5	0.00012	2e-05	8e-05	0	1e-05
							1606.6	0.00011	2e-05	8e-05	0	1e-05
							1604.7	0.0001	2e-05	7e-05	0	1e-05
							1602.8	9e-05	2e-05	6e-05	0	1e-05
							1600.8	8e-05	1e-05	6e-05	0	1e-05

## Sheet: Fig 2-fig sup3b GAL-Hep d15
									GAL-Hep day 15
						Wavelength (cm^-1)
						1699.2	0.00751	0.00022	0.00103	0.00096	0.0006	0.00047	0.00422
						1697.3	0.0085	0.00024	0.00109	0.00104	0.00069	0.00059	0.00486
						1695.3	0.00691	0.00025	0.00116	0.00112	0.00079	0.00074	0.00283
						1693.4	0.00609	0.00026	0.00123	0.00123	0.00093	0.00097	0.00148
						1691.5	0.00618	0.00028	0.00132	0.00134	0.00109	0.0013	0.00085
						1689.6	0.00683	0.00029	0.0014	0.00147	0.00131	0.00182	0.00054
						1687.6	0.00801	0.00031	0.0015	0.00163	0.00158	0.00263	0.00037
						1685.7	0.00981	0.00033	0.00161	0.0018	0.00195	0.00385	0.00027
						1683.8	0.0121	0.00035	0.00173	0.00201	0.00246	0.00536	0.0002
						1681.8	0.01398	0.00037	0.00186	0.00225	0.00315	0.00619	0.00016
						1679.9	0.01463	0.0004	0.00201	0.00254	0.00413	0.00543	0.00013
						1678	0.015	0.00042	0.00218	0.00289	0.00549	0.00392	0.0001
						1676.1	0.0162	0.00045	0.00237	0.0033	0.00731	0.00268	9e-05
						1674.1	0.01821	0.00049	0.00258	0.00381	0.0094	0.00185	7e-05
						1672.2	0.0202	0.00053	0.00283	0.00444	0.01101	0.00133	6e-05
						1670.3	0.02105	0.00057	0.00311	0.00523	0.0111	0.00098	5e-05
						1668.3	0.02067	0.00061	0.00343	0.00623	0.0096	0.00075	5e-05
						1666.4	0.02012	0.00067	0.0038	0.00751	0.00751	0.00059	4e-05
						1664.5	0.02029	0.00073	0.00424	0.00915	0.00565	0.00048	4e-05
						1662.6	0.02151	0.0008	0.00475	0.01129	0.00424	0.00039	3e-05
						1660.6	0.02388	0.00088	0.00536	0.01405	0.00323	0.00033	3e-05
						1658.7	0.02739	0.00097	0.0061	0.0175	0.00252	0.00028	3e-05
						1656.8	0.03188	0.00108	0.00698	0.02157	0.002	0.00024	2e-05
						1654.8	0.03681	0.0012	0.00805	0.02571	0.00162	0.00021	2e-05
						1652.9	0.04105	0.00135	0.00938	0.02879	0.00133	0.00018	2e-05
						1651	0.04336	0.00153	0.01103	0.02952	0.00111	0.00016	2e-05
						1649.1	0.04347	0.00174	0.01311	0.02753	0.00094	0.00014	2e-05
						1647.1	0.04246	0.002	0.01574	0.02377	0.00081	0.00013	2e-05
						1645.2	0.04181	0.00232	0.01911	0.01956	0.0007	0.00011	2e-05
						1643.3	0.04259	0.00271	0.0234	0.01575	0.00061	0.0001	1e-05
						1641.3	0.04528	0.00322	0.02878	0.01264	0.00054	9e-05	1e-05
						1639.4	0.04993	0.00388	0.03529	0.01019	0.00048	9e-05	1e-05
						1637.5	0.05607	0.00474	0.04251	0.00831	0.00043	8e-05	1e-05
						1635.5	0.06246	0.00589	0.04925	0.00685	0.00038	7e-05	1e-05
						1633.6	0.06714	0.00746	0.05354	0.00572	0.00035	7e-05	1e-05
						1631.7	0.06849	0.00963	0.05364	0.00483	0.00031	6e-05	1e-05
						1629.8	0.06661	0.01263	0.04951	0.00412	0.00029	6e-05	1e-05
						1627.8	0.06336	0.01665	0.04283	0.00356	0.00026	5e-05	1e-05
						1625.9	0.0605	0.02151	0.0356	0.00309	0.00024	5e-05	1e-05
						1624	0.05804	0.026	0.02905	0.00271	0.00022	5e-05	1e-05
						1622	0.05405	0.02779	0.02361	0.0024	0.0002	4e-05	1e-05
						1620.1	0.04725	0.0256	0.01928	0.00213	0.00019	4e-05	1e-05
						1618.2	0.03898	0.02097	0.01588	0.00191	0.00018	4e-05	1e-05
						1616.3	0.0313	0.01617	0.01321	0.00171	0.00016	4e-05	1e-05
						1614.3	0.02512	0.01226	0.01111	0.00155	0.00015	3e-05	1e-05
						1612.4	0.02039	0.00936	0.00944	0.00141	0.00014	3e-05	1e-05
						1610.5	0.01683	0.00727	0.00811	0.00128	0.00013	3e-05	1e-05
						1608.5	0.0141	0.00575	0.00702	0.00118	0.00013	3e-05	1e-05
						1606.6	0.01199	0.00463	0.00613	0.00108	0.00012	3e-05	1e-05
						1604.7	0.01033	0.0038	0.00539	0.001	0.00011	3e-05	0
						1602.8	0.009	0.00316	0.00478	0.00092	0.00011	2e-05	0
						1600.8	0.00791	0.00267	0.00426	0.00085	0.0001	2e-05	0

## Sheet: Fig 2-fig sup3b PRLd0
								PRL day 0
						Wavelength (cm^-1)
						1699.2	0.00015	0	0	3e-05	0.00011
						1697.3	0.00019	0	0	4e-05	0.00015
						1695.3	0.00024	0	0	4e-05	0.0002
						1693.4	0.00032	0	0	4e-05	0.00028
						1691.5	0.00047	0	0	5e-05	0.00042
						1689.6	0.00074	0	0	5e-05	0.00068
						1687.6	0.00129	0	0	6e-05	0.00123
						1685.7	0.00241	0	0	6e-05	0.00234
						1683.8	0.00332	0	0	7e-05	0.00325
						1681.8	0.00228	0	0	8e-05	0.0022
						1679.9	0.00124	0	0	9e-05	0.00115
						1678	0.00075	0	0	0.00011	0.00064
						1676	0.00053	0	0	0.00012	0.0004
						1674.1	0.00042	0	0	0.00014	0.00027
						1672.2	0.00037	0	0	0.00017	0.00019
						1670.3	0.00036	0	0	0.00021	0.00014
						1668.3	0.00037	0	0	0.00025	0.00011
						1666.4	0.00041	0	1e-05	0.00032	9e-05
						1664.5	0.00049	0	1e-05	0.00041	7e-05
						1662.5	0.00062	0	1e-05	0.00056	6e-05
						1660.6	0.00083	0	1e-05	0.00078	5e-05
						1658.7	0.0012	0	1e-05	0.00114	4e-05
						1656.8	0.00184	0	1e-05	0.00179	4e-05
						1654.8	0.003	0	1e-05	0.00295	3e-05
						1652.9	0.00463	0	2e-05	0.00458	3e-05
						1651	0.00516	0	2e-05	0.00511	3e-05
						1649	0.00374	0	3e-05	0.00369	2e-05
						1647.1	0.0023	0	3e-05	0.00225	2e-05
						1645.2	0.00146	0	5e-05	0.0014	2e-05
						1643.3	0.00101	0	7e-05	0.00092	2e-05
						1641.3	0.00077	0	0.00011	0.00064	2e-05
						1639.4	0.00069	0	0.00021	0.00047	1e-05
						1637.5	0.00085	0	0.00047	0.00036	1e-05
						1635.5	0.0015	0	0.00121	0.00028	1e-05
						1633.6	0.00131	0	0.00107	0.00023	1e-05
						1631.7	0.00061	0	0.00041	0.00019	1e-05
						1629.8	0.00035	0	0.00019	0.00016	1e-05
						1627.8	0.00024	0	0.0001	0.00013	1e-05
						1625.9	0.00019	0	7e-05	0.00011	1e-05
						1624	0.00015	0	4e-05	0.0001	1e-05
						1622	0.00013	0	3e-05	9e-05	1e-05
						1620.1	0.00011	0	2e-05	8e-05	1e-05
						1618.2	9e-05	0	2e-05	7e-05	1e-05
						1616.3	8e-05	0	2e-05	6e-05	1e-05
						1614.3	7e-05	0	1e-05	5e-05	1e-05
						1612.4	7e-05	0	1e-05	5e-05	1e-05
						1610.5	6e-05	0	1e-05	4e-05	1e-05
						1608.5	5e-05	0	1e-05	4e-05	0
						1606.6	5e-05	0	1e-05	4e-05	0
						1604.7	4e-05	0	1e-05	3e-05	0
						1602.8	4e-05	0	1e-05	3e-05	0
						1600.8	4e-05	0	0	3e-05	0

## Sheet: Fig 2-fig sup3b PRL d15
									PRL day 15
						Wavelength (cm^-1)
						1699.2	0.00019	0	0	5e-05	0	1e-05	0.00012
						1697.3	0.00038	0	0	6e-05	0	1e-05	0.00031
						1695.3	0.00041	0	0	6e-05	0	2e-05	0.00032
						1693.4	0.00022	0	0	7e-05	0	3e-05	0.00013
						1691.5	0.00018	0	0	7e-05	0	4e-05	6e-05
						1689.6	0.00018	0	0	8e-05	0	7e-05	3e-05
						1687.6	0.00024	0	0	9e-05	0	0.00012	2e-05
						1685.7	0.00042	0	0	0.0001	1e-05	0.00029	1e-05
						1683.8	0.00084	0	0	0.00011	1e-05	0.00071	1e-05
						1681.8	0.00063	0	0	0.00013	1e-05	0.00049	1e-05
						1679.9	0.00036	0	0	0.00015	1e-05	0.00019	1e-05
						1678	0.00029	0	0	0.00017	2e-05	9e-05	0
						1676.1	0.00029	0	0	0.00019	4e-05	5e-05	0
						1674.1	0.00033	0	0	0.00023	7e-05	3e-05	0
						1672.2	0.00044	0	0	0.00027	0.00014	2e-05	0
						1670.3	0.00059	0	0	0.00032	0.00024	2e-05	0
						1668.3	0.00058	0	0	0.0004	0.00016	1e-05	0
						1666.4	0.00059	0	0	0.0005	7e-05	1e-05	0
						1664.5	0.00069	0	0	0.00064	4e-05	1e-05	0
						1662.6	0.00089	0	0	0.00085	2e-05	1e-05	0
						1660.6	0.00119	1e-05	0	0.00116	2e-05	1e-05	0
						1658.7	0.00169	1e-05	0	0.00166	1e-05	0	0
						1656.8	0.0025	1e-05	1e-05	0.00247	1e-05	0	0
						1654.8	0.00374	1e-05	1e-05	0.00371	1e-05	0	0
						1652.9	0.00511	1e-05	1e-05	0.00509	0	0	0
						1651	0.00541	1e-05	1e-05	0.00539	0	0	0
						1649.1	0.00425	1e-05	1e-05	0.00422	0	0	0
						1647.1	0.00289	1e-05	2e-05	0.00285	0	0	0
						1645.2	0.00194	1e-05	2e-05	0.0019	0	0	0
						1643.3	0.00136	1e-05	3e-05	0.00131	0	0	0
						1641.3	0.00101	2e-05	5e-05	0.00094	0	0	0
						1639.4	0.00082	2e-05	0.0001	0.0007	0	0	0
						1637.5	0.00078	2e-05	0.00021	0.00054	0	0	0
						1635.5	0.00102	3e-05	0.00056	0.00043	0	0	0
						1633.6	0.00099	3e-05	0.00061	0.00035	0	0	0
						1631.7	0.00057	4e-05	0.00024	0.00029	0	0	0
						1629.8	0.0004	5e-05	0.0001	0.00024	0	0	0
						1627.8	0.00034	7e-05	6e-05	0.0002	0	0	0
						1625.9	0.00032	0.00011	4e-05	0.00018	0	0	0
						1624	0.00034	0.00016	2e-05	0.00015	0	0	0
						1622	0.00042	0.00026	2e-05	0.00013	0	0	0
						1620.1	0.00061	0.00047	1e-05	0.00012	0	0	0
						1618.2	0.00096	0.00084	1e-05	0.00011	0	0	0
						1616.3	0.00109	0.00099	1e-05	9e-05	0	0	0
						1614.3	0.00071	0.00062	1e-05	8e-05	0	0	0
						1612.4	0.00042	0.00034	1e-05	8e-05	0	0	0
						1610.5	0.00027	0.0002	0	7e-05	0	0	0
						1608.5	0.00019	0.00013	0	6e-05	0	0	0
						1606.6	0.00015	9e-05	0	6e-05	0	0	0
						1604.7	0.00012	6e-05	0	5e-05	0	0	0
						1602.8	0.0001	5e-05	0	5e-05	0	0	0
						1600.8	9e-05	4e-05	0	5e-05	0	0	0

## Sheet: Fig 2-fig sup3b PRL-CSA d0
								PRL-CSA day 0
						Wavelength (cm^-1)
						1699.2	0.00883	0.00136	0.00244	0.00504
						1697.3	0.01037	0.00148	0.00274	0.00615
						1695.3	0.01235	0.00161	0.00311	0.00763
						1693.4	0.01493	0.00175	0.00355	0.00962
						1691.5	0.0183	0.00192	0.00409	0.0123
						1689.6	0.02268	0.00212	0.00474	0.01583
						1687.6	0.02809	0.00234	0.00556	0.0202
						1685.7	0.03399	0.0026	0.00658	0.02481
						1683.8	0.03889	0.0029	0.00786	0.02813
						1681.8	0.04111	0.00326	0.00948	0.02836
						1679.9	0.04059	0.00369	0.01154	0.02535
						1678	0.03911	0.00421	0.01411	0.0208
						1676	0.03837	0.00483	0.0172	0.01634
						1674.1	0.03894	0.0056	0.02065	0.0127
						1672.2	0.04043	0.00655	0.02396	0.00992
						1670.3	0.04187	0.00775	0.02626	0.00786
						1668.3	0.0423	0.00927	0.02671	0.00632
						1666.4	0.04151	0.01124	0.02511	0.00516
						1664.5	0.04017	0.01378	0.02211	0.00428
						1662.5	0.03933	0.0171	0.01863	0.0036
						1660.6	0.03977	0.02135	0.01535	0.00306
						1658.7	0.04182	0.02663	0.01256	0.00263
						1656.8	0.04519	0.03261	0.0103	0.00228
						1654.8	0.04871	0.03821	0.0085	0.002
						1652.9	0.05041	0.04156	0.00708	0.00176
						1651	0.04861	0.04109	0.00596	0.00157
						1649	0.0435	0.03703	0.00507	0.0014
						1647.1	0.0368	0.03119	0.00435	0.00126
						1645.2	0.03021	0.02531	0.00376	0.00114
						1643.3	0.02459	0.02027	0.00329	0.00103
						1641.3	0.02008	0.01624	0.00289	0.00094
						1639.4	0.01655	0.01313	0.00256	0.00086
						1637.5	0.01381	0.01073	0.00228	0.00079
						1635.5	0.01166	0.00888	0.00204	0.00073
						1633.6	0.00996	0.00744	0.00184	0.00068
						1631.7	0.0086	0.00631	0.00167	0.00063
						1629.8	0.0075	0.0054	0.00152	0.00058
						1627.8	0.0066	0.00467	0.00138	0.00054
						1625.9	0.00585	0.00408	0.00127	0.00051
						1624	0.00523	0.00358	0.00117	0.00048
						1622	0.0047	0.00317	0.00108	0.00045
						1620.1	0.00424	0.00283	0.001	0.00042
						1618.2	0.00385	0.00253	0.00092	0.0004
						1616.3	0.00352	0.00228	0.00086	0.00037
						1614.3	0.00322	0.00207	0.0008	0.00035
						1612.4	0.00296	0.00188	0.00075	0.00033
						1610.5	0.00274	0.00172	0.0007	0.00032
						1608.5	0.00253	0.00158	0.00066	0.0003
						1606.6	0.00235	0.00145	0.00062	0.00029
						1604.7	0.00219	0.00134	0.00058	0.00027
						1602.8	0.00205	0.00124	0.00055	0.00026
						1600.8	0.00192	0.00115	0.00052	0.00025

## Sheet: Fig 2-fig sup3b PRL-CSA d15
								PRL-CSA day 15
						Wavelength (cm^-1)
						1699.2	0.00021	0	2e-05	9e-05	0.0001
						1697.3	0.00027	0	2e-05	0.00011	0.00013
						1695.3	0.00034	0	2e-05	0.00014	0.00018
						1693.4	0.00046	0	2e-05	0.00017	0.00026
						1691.5	0.00067	0	3e-05	0.00023	0.00041
						1689.6	0.00103	1e-05	3e-05	0.00031	0.00069
						1687.6	0.00172	1e-05	3e-05	0.00044	0.00124
						1685.7	0.00263	1e-05	4e-05	0.00065	0.00194
						1683.8	0.00273	1e-05	4e-05	0.00098	0.0017
						1681.8	0.00243	1e-05	5e-05	0.0014	0.00098
						1679.9	0.00222	1e-05	5e-05	0.00161	0.00055
						1678	0.00176	1e-05	6e-05	0.00135	0.00034
						1676	0.00124	1e-05	7e-05	0.00094	0.00022
						1674.1	0.00087	1e-05	8e-05	0.00062	0.00016
						1672.2	0.00065	1e-05	0.0001	0.00042	0.00012
						1670.3	0.00052	1e-05	0.00011	0.0003	9e-05
						1668.3	0.00045	1e-05	0.00014	0.00022	7e-05
						1666.4	0.00042	2e-05	0.00018	0.00017	6e-05
						1664.5	0.00043	2e-05	0.00023	0.00013	5e-05
						1662.5	0.00047	2e-05	0.0003	0.00011	4e-05
						1660.6	0.00056	2e-05	0.00041	9e-05	3e-05
						1658.7	0.00072	3e-05	0.00059	7e-05	3e-05
						1656.8	0.001	3e-05	0.00088	6e-05	3e-05
						1654.8	0.00146	4e-05	0.00135	5e-05	2e-05
						1652.9	0.00203	5e-05	0.00191	5e-05	2e-05
						1651	0.00222	6e-05	0.0021	4e-05	2e-05
						1649	0.0018	8e-05	0.00166	4e-05	2e-05
						1647.1	0.00127	0.00011	0.00111	3e-05	1e-05
						1645.2	0.00092	0.00015	0.00073	3e-05	1e-05
						1643.3	0.00076	0.00022	0.0005	3e-05	1e-05
						1641.3	0.00073	0.00035	0.00035	2e-05	1e-05
						1639.4	0.00086	0.00056	0.00026	2e-05	1e-05
						1637.5	0.0011	0.00087	0.0002	2e-05	1e-05
						1635.5	0.00118	0.001	0.00016	2e-05	1e-05
						1633.6	0.0009	0.00075	0.00013	2e-05	1e-05
						1631.7	0.00059	0.00046	0.00011	1e-05	1e-05
						1629.8	0.0004	0.00029	9e-05	1e-05	1e-05
						1627.8	0.00028	0.00019	7e-05	1e-05	1e-05
						1625.9	0.00021	0.00013	6e-05	1e-05	1e-05
						1624	0.00017	0.0001	6e-05	1e-05	1e-05
						1622	0.00014	7e-05	5e-05	1e-05	1e-05
						1620.1	0.00012	6e-05	4e-05	1e-05	0
						1618.2	0.0001	5e-05	4e-05	1e-05	0
						1616.3	9e-05	4e-05	3e-05	1e-05	0
						1614.3	8e-05	3e-05	3e-05	1e-05	0
						1612.4	7e-05	3e-05	3e-05	1e-05	0
						1610.5	6e-05	2e-05	3e-05	1e-05	0
						1608.5	5e-05	2e-05	2e-05	1e-05	0
						1606.6	5e-05	2e-05	2e-05	1e-05	0
						1604.7	4e-05	2e-05	2e-05	1e-05	0
						1602.8	4e-05	1e-05	2e-05	1e-05	0
						1600.8	4e-05	1e-05	2e-05	1e-05	0

## Sheet: Fig 2-fig sup3b PRL-GAL d0
									PRL-GAL day 0
						Wavelength (cm^-1)
						1699.2	0.00018	0	0	3e-05	0	2e-05	0.00013
						1697.3	0.0004	0	0	3e-05	0	2e-05	0.00035
						1695.3	0.00055	0	0	3e-05	0	3e-05	0.00049
						1693.4	0.00028	0	0	3e-05	0	4e-05	0.0002
						1691.5	0.00019	0	0	4e-05	0	6e-05	8e-05
						1689.6	0.00018	0	0	4e-05	0	9e-05	4e-05
						1687.6	0.00023	0	0	4e-05	0	0.00015	3e-05
						1685.7	0.00036	0	0	5e-05	0	0.00028	2e-05
						1683.8	0.00065	0	0	6e-05	0	0.00057	1e-05
						1681.8	0.00091	0	0	6e-05	0	0.00082	1e-05
						1679.9	0.00061	0	0	7e-05	1e-05	0.00052	1e-05
						1678	0.00036	0	0	8e-05	1e-05	0.00026	1e-05
						1676.1	0.00026	0	0	9e-05	2e-05	0.00014	0
						1674.1	0.00023	0	0	0.00011	3e-05	9e-05	0
						1672.2	0.00026	0	1e-05	0.00013	7e-05	6e-05	0
						1670.3	0.00038	0	1e-05	0.00015	0.00017	4e-05	0
						1668.3	0.00037	0	1e-05	0.00018	0.00015	3e-05	0
						1666.4	0.00032	0	1e-05	0.00023	6e-05	2e-05	0
						1664.5	0.00034	0	1e-05	0.00028	3e-05	2e-05	0
						1662.6	0.00042	0	1e-05	0.00037	1e-05	2e-05	0
						1660.6	0.00054	0	1e-05	0.0005	1e-05	1e-05	0
						1658.7	0.00074	1e-05	1e-05	0.0007	1e-05	1e-05	0
						1656.8	0.00106	1e-05	1e-05	0.00103	0	1e-05	0
						1654.8	0.00162	1e-05	2e-05	0.00158	0	1e-05	0
						1652.9	0.00247	1e-05	2e-05	0.00243	0	1e-05	0
						1651	0.00329	1e-05	2e-05	0.00324	0	1e-05	0
						1649.1	0.00314	1e-05	3e-05	0.00309	0	1e-05	0
						1647.1	0.00225	1e-05	4e-05	0.00219	0	0	0
						1645.2	0.00148	1e-05	5e-05	0.00141	0	0	0
						1643.3	0.00102	1e-05	7e-05	0.00093	0	0	0
						1641.3	0.00077	1e-05	0.00011	0.00064	0	0	0
						1639.4	0.00065	2e-05	0.00017	0.00046	0	0	0
						1637.5	0.00067	2e-05	0.0003	0.00035	0	0	0
						1635.5	0.00087	2e-05	0.00057	0.00027	0	0	0
						1633.6	0.00113	3e-05	0.00088	0.00021	0	0	0
						1631.7	0.00088	4e-05	0.00067	0.00017	0	0	0
						1629.8	0.00055	5e-05	0.00035	0.00014	0	0	0
						1627.8	0.00038	6e-05	0.00019	0.00012	0	0	0
						1625.9	0.00031	8e-05	0.00012	0.0001	0	0	0
						1624	0.00029	0.00012	8e-05	9e-05	0	0	0
						1622	0.00032	0.00019	6e-05	8e-05	0	0	0
						1620.1	0.00042	0.00031	4e-05	7e-05	0	0	0
						1618.2	0.00064	0.00054	3e-05	6e-05	0	0	0
						1616.3	0.00093	0.00085	3e-05	5e-05	0	0	0
						1614.3	0.00087	0.0008	2e-05	5e-05	0	0	0
						1612.4	0.00055	0.00049	2e-05	4e-05	0	0	0
						1610.5	0.00033	0.00028	1e-05	4e-05	0	0	0
						1608.5	0.00022	0.00017	1e-05	4e-05	0	0	0
						1606.6	0.00016	0.00011	1e-05	3e-05	0	0	0
						1604.7	0.00012	8e-05	1e-05	3e-05	0	0	0
						1602.8	0.0001	6e-05	1e-05	3e-05	0	0	0
						1600.8	8e-05	4e-05	1e-05	3e-05	0	0	0

## Sheet: Fig 2-fig sup3b PRL-GAL d15
									PRL-GAL day 15
							Wavelength (cm^-1)
							1699.2	0.0013	6e-05	0.00024	0.00042	0.00015	8e-05	0.00035
							1697.3	0.00176	6e-05	0.00025	0.00046	0.00018	0.0001	0.00072
							1695.3	0.00183	6e-05	0.00027	0.0005	0.0002	0.00013	0.00067
							1693.4	0.00163	7e-05	0.00028	0.00055	0.00024	0.00017	0.00032
							1691.5	0.00167	7e-05	0.0003	0.0006	0.00028	0.00025	0.00016
							1689.6	0.00189	8e-05	0.00032	0.00066	0.00034	0.0004	9e-05
							1687.6	0.00234	8e-05	0.00034	0.00074	0.00042	0.00071	6e-05
							1685.7	0.00327	8e-05	0.00037	0.00082	0.00053	0.00142	4e-05
							1683.8	0.005	9e-05	0.0004	0.00092	0.00068	0.00288	3e-05
							1681.8	0.00534	0.0001	0.00043	0.00104	0.00091	0.00285	2e-05
							1679.9	0.00441	0.0001	0.00046	0.00118	0.00125	0.0014	2e-05
							1678	0.00446	0.00011	0.0005	0.00135	0.00179	0.0007	1e-05
							1676.1	0.00526	0.00012	0.00055	0.00156	0.00263	0.0004	1e-05
							1674.1	0.00664	0.00012	0.0006	0.00182	0.00383	0.00025	1e-05
							1672.2	0.00805	0.00013	0.00066	0.00215	0.00492	0.00017	1e-05
							1670.3	0.00843	0.00015	0.00072	0.00258	0.00485	0.00013	1e-05
							1668.3	0.0079	0.00016	0.0008	0.00314	0.0037	0.0001	1e-05
							1666.4	0.00756	0.00017	0.00089	0.00389	0.00253	8e-05	1e-05
							1664.5	0.00787	0.00019	0.001	0.0049	0.00172	6e-05	0
							1662.6	0.0089	0.0002	0.00112	0.00631	0.00121	5e-05	0
							1660.6	0.01069	0.00022	0.00128	0.00827	0.00088	4e-05	0
							1658.7	0.01338	0.00025	0.00146	0.01097	0.00067	4e-05	0
							1656.8	0.01697	0.00027	0.00168	0.01447	0.00052	3e-05	0
							1654.8	0.02091	0.00031	0.00196	0.0182	0.00041	3e-05	0
							1652.9	0.0236	0.00034	0.0023	0.02059	0.00034	2e-05	0
							1651	0.02343	0.00039	0.00275	0.01999	0.00028	2e-05	0
							1649.1	0.02088	0.00044	0.00332	0.01687	0.00023	2e-05	0
							1647.1	0.01788	0.00051	0.00406	0.01309	0.0002	2e-05	0
							1645.2	0.0157	0.00059	0.00505	0.00987	0.00017	1e-05	0
							1643.3	0.0147	0.00069	0.00638	0.00746	0.00015	1e-05	0
							1641.3	0.01485	0.00082	0.00815	0.00573	0.00013	1e-05	0
							1639.4	0.01604	0.00099	0.01044	0.00449	0.00012	1e-05	0
							1637.5	0.01807	0.00121	0.01315	0.00358	0.0001	1e-05	0
							1635.5	0.02031	0.00152	0.01578	0.00291	9e-05	1e-05	0
							1633.6	0.02173	0.00195	0.01727	0.00241	8e-05	1e-05	0
							1631.7	0.02148	0.00257	0.0168	0.00202	8e-05	1e-05	0
							1629.8	0.01994	0.0035	0.01464	0.00172	7e-05	1e-05	0
							1627.8	0.01833	0.0049	0.01187	0.00148	6e-05	1e-05	0
							1625.9	0.01765	0.00698	0.00932	0.00128	6e-05	1e-05	0
							1624	0.01809	0.00963	0.00728	0.00112	5e-05	1e-05	0
							1622	0.01846	0.0117	0.00572	0.00099	5e-05	1e-05	0
							1620.1	0.01681	0.01132	0.00456	0.00088	5e-05	1e-05	0
							1618.2	0.01343	0.0089	0.00369	0.00079	4e-05	0	0
							1616.3	0.01013	0.00635	0.00303	0.00071	4e-05	0	0
							1614.3	0.00768	0.00447	0.00253	0.00064	4e-05	0	0
							1612.4	0.00597	0.00321	0.00214	0.00058	3e-05	0	0
							1610.5	0.00477	0.00238	0.00182	0.00053	3e-05	0	0
							1608.5	0.00391	0.00182	0.00157	0.00049	3e-05	0	0
							1606.6	0.00328	0.00143	0.00137	0.00045	3e-05	0	0
							1604.7	0.00279	0.00115	0.0012	0.00041	3e-05	0	0
							1602.8	0.00241	0.00094	0.00106	0.00038	3e-05	0	0
							1600.8	0.00211	0.00078	0.00095	0.00035	2e-05	0	0
