# Supplementary material for: Co-aggregation and secondary nucleation in the life cycle of human prolactin/galanin functional amyloids
Source: eLife. 2022 Mar 8;11:e73835. doi: 10.7554/eLife.73835 (PMC8993219; doi:10.7554/eLife.73835)
Supplement: Figure 2—figure supplement 4—source data 1. [file elife-73835-fig2-figsupp4-data1.xlsx]

## Sheet: Fig 2-fig sup4 right panel
				Day 0
																													p value	0.0001	***
		ThT 480 nm		Set 1	Set 2	Mean	Stdev	Set 1	Set 2	Mean	Stdev	Set 1	Set 2	Mean	Stdev	Set 1	Set 2	Mean	Stdev	Set 1	Set 2	Mean	Stdev	Set 1	Set 2	Mean	Stdev
		PRL-GAL		100-100				100-200				100-300				100-400				100-500				100-600
				303.244	318.207	310.726	10.5804	254.945	260.65	257.798	4.03404	298.459	282.503	290.481	11.2826	272.508	267.625	270.067	3.4528	300.663	306.37	303.517	4.03546	232.751	237.634	235.192	3.4528
				200-100				200-200				200-300				200-400				200-500				200-600
				283.059	318.509	300.784	25.0669	248.034	250.266	249.15	1.57826	299.521	268.639	284.08	21.8369	226.171	266.852	246.511	28.7658	281.305	300.544	290.924	13.604	273.743	231.086	252.415	30.1631
				300-100				300-200				300-300				300-400				300-500				300-600
				293.578	284.043	288.81	6.74226	211.836	276.78	244.308	45.9223	211.264	298.472	254.868	61.6654	225.073	242.184	233.629	12.0993	280.242	272.239	276.24	5.65898	250.716	246.586	248.651	2.92035
				400-100				400-200				400-300				400-400				400-500				400-600
				295.33	294.051	294.69	0.90439	275.902	249.207	262.554	18.8762	266.112	210.046	238.079	39.6446	247.468	280.619	264.043	23.4413	216.975	262.741	239.858	32.3614	267.618	302.722	285.17	24.8223
				500-100				500-200				500-300				500-400				500-500				500-600
				264.755	279.908	272.332	10.7148	211.039	283.317	247.178	51.1083	320.794	210.046	265.42	78.3107	302.381	263.385	282.883	27.5743	261.155	265.808	263.481	3.29017	278.746	302.948	290.847	17.1134
				600-100				600-200				600-300				600-400				600-500				600-600
				255.078	252.254	253.666	1.99687	286.343	301.303	293.823	10.5783	327.286	333.782	330.534	4.59337	301.663	218.108	259.885	59.0823	279.488	337.279	308.384	40.8644	272.573	336.291	304.432	45.0554
				Day 15
				Set 1	Set 2	Mean	Stdev	Set 1	Set 2	Mean	Stdev	Set 1	Set 2	Mean	Stdev	Set 1	Set 2	Mean	Stdev	Set 1	Set 2	Mean	Stdev	Set 1	Set 2	Mean	Stdev
				100-100				100-200				100-300				100-400				100-500				100-600
				304.603	255.566	280.084	34.6744	284.973	313.528	299.25	20.1914	280.064	272.624	276.344	5.26087	247.479	343.859	295.669	68.151	272.519	286.087	279.303	9.59402	318.923	302.381	310.652	11.697
				200-100				200-200				200-300				200-400				200-500				200-600
				306.492	296.74	301.616	6.89571	258.675	280.674	269.674	15.5556	278.1	272.803	275.452	3.74554	294.987	296.702	295.845	1.21269	299.662	249.621	274.642	35.3843	309.333	302.989	306.161	4.48589
				300-100				300-200				300-300				300-400				300-500				300-600
				305.624	273.938	289.781	22.4054	277.653	306.281	291.967	20.2431	250.833	285.691	268.262	24.6483	271.055	288.86	279.957	12.59	236.798	326.629	281.714	63.5201	298.02	295.976	296.998	1.44533
				400-100				400-200				400-300				400-400				400-500				400-600
				302.347	279.554	290.95	16.1171	280.054	273.486	276.77	4.64428	270.357	250.859	260.608	13.7872	1177.37	1152.92	1165.14	17.2888	1139.21	1119.57	1129.39	13.8876	1120.99	1150.75	1135.87	21.0435
				500-100				500-200				500-300				500-400				500-500				500-600
				276.508	252.256	264.382	17.1488	278.92	274.501	276.711	3.1247	280.015	248.348	264.182	22.392	1140.6	1126.28	1133.44	10.1258	1130.06	1147.14	1138.6	12.0774	1101.16	1083.29	1092.22	12.636
				600-100				600-200				600-300				600-400				600-500				600-600
				284.363	306.083	295.223	15.3584	310.946	291.808	301.377	13.5326	288.232	253.531	270.882	24.5373	1140.61	1125.24	1132.92	10.8682	1136.11	1148.49	1142.3	8.75398	1096.26	1129.63	1112.95	23.5962
