# Supplementary material for: Co-aggregation and secondary nucleation in the life cycle of human prolactin/galanin functional amyloids
Source: eLife. 2022 Mar 8;11:e73835. doi: 10.7554/eLife.73835 (PMC8993219; doi:10.7554/eLife.73835)
Supplement: Figure 2—source data 1. [file elife-73835-fig2-data1.xlsx]

## Sheet: Figure 2b
		ThT	PRL+CSA					substraction by lowest value	division by highest value		substraction by lowest value	division by highest value		substraction by lowest value	division by highest value
		480 nm
			Time (d)	Set1	Set2	Set3		SET 1			SET 2			SET 3			SET1	SET2	SET3		AVG	STDEV	STDERR
			0	218.797	242.606	244.702		0	0		0	0		0	0		0	0	0		0	0	0
			1	227.897	239.498	246.439		9.1	0.00912781		-3.108	-0.00338583		1.737	0.00181125		0.00912781	-0.00338583	0.00181125		0.00251774	0.00628666	0.00362971
			2	232.64	232.022	230.875		13.843	0.0138853		-10.584	-0.0115301		-13.827	-0.014418		0.0138853	-0.0115301	-0.014418		-0.00402094	0.0155744	0.00899212
			3	207.674	225.505	259.384		-11.123	-0.011157		-17.101	-0.0186297		14.682	0.0153096		-0.011157	-0.0186297	0.0153096		-0.0048257	0.0178335	0.0102965
			4	205.226	247.373	240.191		-13.571	-0.0136125		4.767	0.00519313		-4.511	-0.00470382		-0.0136125	0.00519313	-0.00470382		-0.00437439	0.00940713	0.00543137
			5	252.027	253.933	292.16		33.23	0.0333316		11.327	0.0123395		47.458	0.0494866		0.0333316	0.0123395	0.0494866		0.0317192	0.0186259	0.010754
			6	216.83	269.99	196.864		-1.967	-0.00197301		27.384	0.0298319		-47.838	-0.0498828		-0.00197301	0.0298319	-0.0498828		-0.00734131	0.0401276	0.0231683
			7	253.763	295.986	274.183		34.966	0.0350729		53.38	0.0581517		29.481	0.0307411		0.0350729	0.0581517	0.0307411		0.0413219	0.0147351	0.00850755
			8	259.039	286.13	349.554		40.242	0.040365		43.524	0.0474147		104.852	0.109334		0.040365	0.0474147	0.109334		0.0657045	0.0379482	0.02191
			9	348.388	411.662	447.483		129.591	0.129987		169.056	0.184168		202.781	0.211449		0.129987	0.184168	0.211449		0.175201	0.0414645	0.0239402
			10	458.214	527.154	522.557		239.417	0.240149		284.548	0.309984		277.855	0.289732		0.240149	0.309984	0.289732		0.279955	0.0359296	0.0207445
			11	460.251	637.503	577.317		241.454	0.242192		394.897	0.430197		332.615	0.346832		0.242192	0.430197	0.346832		0.339741	0.0942031	0.0543898
			12	667.057	688.962	706.674		448.26	0.44963		446.356	0.486256		461.972	0.481719		0.44963	0.486256	0.481719		0.472535	0.0199656	0.0115275
			13	797.067	753.307	759.02		578.27	0.580037		510.701	0.556353		514.318	0.536302		0.580037	0.556353	0.536302		0.557564	0.0218928	0.0126402
			14	842.583	820.263	853.682		623.786	0.625692		577.657	0.629294		608.98	0.63501		0.625692	0.629294	0.63501		0.629999	0.00469873	0.00271289
			15	909.632	995.196	990.082		690.835	0.692946		752.59	0.819865		745.38	0.777241		0.692946	0.819865	0.777241		0.763351	0.0645892	0.0372917
			16	1044.43	1111.25	1074.11		825.633	0.828156		868.644	0.946293		829.408	0.86486		0.828156	0.946293	0.86486		0.87977	0.0604631	0.0349094
			17	1121.49	1178.87	1168.23		902.693	0.905452		936.264	1.01996		923.528	0.963003		0.905452	1.01996	0.963003		0.962804	0.0572531	0.0330561
			18	1088.71	1169.33	1051.62		869.913	0.872572		926.724	1.00956		806.918	0.841409		0.872572	1.00956	0.841409		0.907849	0.0894563	0.0516492
			20	1215.75	1160.55	1203.71		996.953	1		917.944	1		959.008	1		1	1	1		1	0	0
			PRL+GAL					substraction by lowest value	division by highest value		substraction by lowest value	division by highest value		substraction by lowest value	division by highest value
			Time (d)	Set1	Set2	Set3		SET 1			SET 2			SET 3			SET1	SET2	SET3		AVG	STDEV	STDERR
			0	264.122	277.453	286.036		0	0		0	0		0	0		0	0	0		0	0	0
			1	253.531	259.846	259.846		-10.591	-0.012218		-17.607	-0.0204933		-26.19	-0.0306651		-0.012218	-0.0204933	-0.0306651		-0.0211255	0.00923982	0.00533477
			2	229.606	228.622	226.886		-34.516	-0.0398183		-48.831	-0.0568359		-59.15	-0.0692571		-0.0398183	-0.0568359	-0.0692571		-0.0553038	0.0147791	0.00853297
			3	266.015	299.001	192.637		1.893	0.0021838		21.548	0.0250804		-93.399	-0.109358		0.0021838	0.0250804	-0.109358		-0.0273647	0.0719255	0.0415274
			4	223.965	254.995	221.123		-40.157	-0.0463258		-22.458	-0.0261396		-64.913	-0.0760048		-0.0463258	-0.0261396	-0.0760048		-0.0494901	0.0250828	0.014482
			5	295.74	198.93	201.875		31.618	0.0364751		-78.523	-0.0913954		-84.161	-0.0985418		0.0364751	-0.0913954	-0.0985418		-0.051154	0.0759731	0.0438644
			6	208.664	260.213	218.136		-55.458	-0.0639774		-17.24	-0.0200662		-67.9	-0.0795022		-0.0639774	-0.0200662	-0.0795022		-0.0545153	0.0308271	0.0177986
			7	293.278	340.785	371.746		29.156	0.0336349		63.332	0.0737141		85.71	0.100355		0.0336349	0.0737141	0.100355		0.0692348	0.0335851	0.0193909
			8	431.864	466.653	537.659		167.742	0.19351		189.2	0.220216		251.623	0.294618		0.19351	0.220216	0.294618		0.236115	0.0523956	0.0302515
			9	527.932	509.16	719.089		263.81	0.304336		231.707	0.269691		433.053	0.50705		0.304336	0.269691	0.50705		0.360359	0.128214	0.0740263
			10	565.142	694.991	664.608		301.02	0.347262		417.538	0.485986		378.572	0.44326		0.347262	0.485986	0.44326		0.425502	0.0710461	0.0410197
			11	674.299	802.344	765.748		410.177	0.473188		524.891	0.610937		479.712	0.561682		0.473188	0.610937	0.561682		0.548602	0.0698	0.0403002
			12	786.105	885.115	889.423		521.983	0.602169		607.662	0.707277		603.387	0.706489		0.602169	0.707277	0.706489		0.671978	0.060458	0.0349065
			13	934.774	951.889	1037.73		670.652	0.773676		674.436	0.784997		751.694	0.880138		0.773676	0.784997	0.880138		0.812937	0.0584721	0.0337599
			14	1022.67	1133.41	1169.95		758.548	0.875075		855.957	0.996275		883.914	1.03495		0.875075	0.996275	1.03495		0.968767	0.0834123	0.0481595
			15	1067.07	1166.62	1222.11		802.948	0.926295		889.167	1.03493		936.074	1.09602		0.926295	1.03493	1.09602		1.01908	0.0859665	0.0496342
			16	1111.97	1237.4	1121.1		847.848	0.978093		959.947	1.11731		835.064	0.977753		0.978093	1.11731	0.977753		1.02439	0.0804768	0.0464647
			17	1075.52	1136.61	1062.79		811.398	0.936043		859.157	1		776.754	0.90948		0.936043	1	0.90948		0.948508	0.0465295	0.0268646
			18	1007.88	1062.92	1074.98		743.758	0.858013		785.467	0.91423		788.944	0.923753		0.858013	0.91423	0.923753		0.898665	0.0355266	0.0205119
			20	1130.96	914.563	1140.1		866.838	1		637.11	0.741552		854.064	1		1	0.741552	1		0.913851	0.149215	0.0861517
																							0
			GAL+Hep					substraction by lowest value	division by highest value		substraction by lowest value	division by highest value		substraction by lowest value	division by highest value
			Time (d)	Set1	Set2	Set3		SET 1			SET 2			SET 3			SET1	SET2	SET3		AVG	STDEV	STDERR
			0	288.995	279.391	261.46		0	0		0	0		0	0		0	0	0		0	0	0
			1	269.486	271.317	271.433		-19.509	-0.0252663		-8.074	-0.0102668		9.973	0.0119835		-0.0252663	-0.0102668	0.0119835		-0.00784988	0.0187421	0.0108211
			2	225.979	224.536	222.417		-63.016	-0.0816127		-54.855	-0.0697529		-39.043	-0.0469137		-0.0816127	-0.0697529	-0.0469137		-0.0660931	0.0176366	0.0101828
			3	210.329	291.177	217.616		-78.666	-0.101881		11.786	0.0149869		-43.844	-0.0526826		-0.101881	0.0149869	-0.0526826		-0.0465256	0.0586768	0.0338781
			4	270.564	275.833	289.383		-18.431	-0.0238702		-3.558	-0.00452431		27.923	0.033552		-0.0238702	-0.00452431	0.033552		0.00171918	0.0292158	0.0168682
			5	195.791	274.263	214.079		-93.204	-0.120709		-5.128	-0.0065207		-47.381	-0.0569326		-0.120709	-0.0065207	-0.0569326		-0.0613876	0.0572246	0.0330396
			6	349.834	464.055	264.575		60.839	0.0787932		184.664	0.234816		3.115	0.00374296		0.0787932	0.234816	0.00374296		0.105784	0.117878	0.0680586
			7	383.854	423.016	552.66		94.859	0.122853		143.625	0.182632		291.2	0.349903		0.122853	0.182632	0.349903		0.218463	0.11769	0.0679502
			8	594.631	660.812	754.699		305.636	0.395832		381.421	0.48501		493.239	0.592671		0.395832	0.48501	0.592671		0.491171	0.0985641	0.0569077
			9	786.118	702.165	874.975		497.123	0.643829		422.774	0.537594		613.515	0.737194		0.643829	0.537594	0.737194		0.639539	0.0998692	0.0576612
			10	793.427	861.315	841.727		504.432	0.653295		581.924	0.739967		580.267	0.697244		0.653295	0.739967	0.697244		0.696835	0.0433373	0.0250216
			11	888.956	878.543	1010.93		599.961	0.777016		599.152	0.761874		749.47	0.900556		0.777016	0.761874	0.900556		0.813149	0.076075	0.0439232
			12	952.942	957.01	1027.13		663.947	0.859885		677.619	0.861651		765.67	0.920022		0.859885	0.861651	0.920022		0.880519	0.0342218	0.0197585
			13	1081.48	911.706	1033.24		792.485	1.02636		632.315	0.804043		771.78	0.927364		1.02636	0.804043	0.927364		0.919254	0.111378	0.0643058
			14	965.836	1052.82	1066.62		676.841	0.876584		773.429	0.983482		805.16	0.967473		0.876584	0.983482	0.967473		0.942513	0.0576547	0.0332879
			15	1028.25	1078.59	1093.2		739.255	0.957417		799.199	1.01625		831.74	0.999411		0.957417	1.01625	0.999411		0.991026	0.0303001	0.0174943
			16	1030.82	1015.92	1025.92		741.825	0.960745		736.529	0.936561		764.46	0.918568		0.960745	0.936561	0.918568		0.938625	0.0211641	0.0122195
			17
			18
			20	1061.13	1065.81	1093.69		772.135	1		786.419	1		832.23	1		1	1	1		1	0	0
			PRL					substraction by lowest value	division by highest value of PRL+CSA		substraction by lowest value	division by highest value of PRL+CSA		substraction by lowest value	division by highest value of PRL+CSA
			Time (d)	Set1	Set2	Set3		SET 1			SET 2			SET 3			SET1	SET2	SET3		AVG	STDEV	STDERR
			0	231.33	231.464	236.192		0	0		0	0		0	0		0	0	0		0	0	0
			1	271.13	270.072	269.949		39.8	0.0399216		38.608	0.0420592		33.757	0.0351999		0.0399216	0.0420592	0.0351999		0.0390603	0.00350984	0.00202647
			2	220.421	218.613	217.239		-10.909	-0.0109423		-12.851	-0.0139998		-18.953	-0.0197631		-0.0109423	-0.0139998	-0.0197631		-0.0149017	0.00447904	0.00258605
			3	211.21	212.473	222.705		-20.12	-0.0201815		-18.991	-0.0206886		-13.487	-0.0140635		-0.0201815	-0.0206886	-0.0140635		-0.0183112	0.00368736	0.00212896
			4	276.135	287.359	279.204		44.805	0.0449419		55.895	0.0608915		43.012	0.0448505		0.0449419	0.0608915	0.0448505		0.050228	0.009235	0.00533198
			5	207.373	202.779	219.526		-23.957	-0.0240302		-28.685	-0.0312492		-16.666	-0.0173784		-0.0240302	-0.0312492	-0.0173784		-0.0242193	0.00693734	0.00400539
			6	271.166	280.542	283.45		39.836	0.0399578		49.078	0.0534651		47.258	0.049278		0.0399578	0.0534651	0.049278		0.047567	0.00691434	0.00399211
			7	255.613	293.494	277.311		24.283	0.0243572		62.03	0.0675749		41.119	0.0428766		0.0243572	0.0675749	0.0428766		0.0449362	0.0216823	0.0125187
			8	287.176	269.172	299.382		55.846	0.0560167		37.708	0.0410788		63.19	0.065891		0.0560167	0.0410788	0.065891		0.0543288	0.0124919	0.00721244
			9
			10	162.686	280.037	302.009		-68.644	-0.0688538		48.573	0.052915		65.817	0.0686303		-0.0688538	0.052915	0.0686303		0.0175638	0.0752512	0.0434476
			11
			12
			13	256.258	259.322	322.243		24.928	0.0250042		27.858	0.0303483		86.051	0.0897292		0.0250042	0.0303483	0.0897292		0.0483605	0.0359258	0.0207424
			14																				0
			15	220.613	301.017	227.035		-10.717	-0.0107498		69.553	0.0757704		-9.157	-0.00954841		-0.0107498	0.0757704	-0.00954841		0.0184908	0.0496093	0.0286428
			16
			17
			18	167.557	228.406	342.853		-63.773	-0.0639679		-3.058	-0.00333136		106.661	0.11122		-0.0639679	-0.00333136	0.11122		0.0146403	0.088966	0.051366
			20	196.633	273.003	240.601		-34.697	-0.034803		41.539	0.0452522		4.409	0.00459746		-0.034803	0.0452522	0.00459746		0.00501554	0.0400293	0.0231116
			GAL					substraction by lowest value	division by highest value of GAL+Hep		substraction by lowest value	division by highest value of GAL+Hep		substraction by lowest value	division by highest value of GAL+Hep
			Time (d)	Set1	Set2	Set3		SET 1			SET 2			SET 3			SET1	SET2	SET3		AVG	STDEV	STDERR
			0	246.764	225.253	224.016		0	0		0	0		0	0		0	0	0		0	0	0
			1	269.204	267.965	264.313		22.44	0.0290623		42.712	0.054312		40.297	0.0484205		0.0290623	0.054312	0.0484205		0.0439316	0.0132098	0.00762693
			2	216.624	216.562	218.048		-30.14	-0.0390346		-8.691	-0.0110514		-5.968	-0.00717109		-0.0390346	-0.0110514	-0.00717109		-0.0190857	0.0173849	0.0100375
			3	223.481	217.701	207.238		-23.283	-0.0301541		-7.552	-0.00960302		-16.778	-0.0201603		-0.0301541	-0.00960302	-0.0201603		-0.0199725	0.0102768	0.00593349
			4	257.571	270.564	254.995		10.807	0.0139963		45.311	0.0576169		30.979	0.0372241		0.0139963	0.0576169	0.0372241		0.0362791	0.0218257	0.0126014
			5	213.161	217.68	261.019		-33.603	-0.0435196		-7.573	-0.00962973		37.003	0.0444625		-0.0435196	-0.00962973	0.0444625		-0.00289562	0.0443759	0.0256212
			6	267.45	276.508	293.552		20.686	0.0267907		51.255	0.0651752		69.536	0.0835538		0.0267907	0.0651752	0.0835538		0.0585066	0.0289632	0.0167224
			7	298.812	276.297	338.156		52.048	0.0674079		51.044	0.0649069		114.14	0.13715		0.0674079	0.0649069	0.13715		0.0898215	0.0410064	0.0236758
			8	279.567	287.767	263.955		32.803	0.0424835		62.514	0.079492		39.939	0.0479903		0.0424835	0.079492	0.0479903		0.0566553	0.0199679	0.0115288
			9
			10	152.05	326.31	307.534		-94.714	-0.122665		101.057	0.128503		83.518	0.100354		-0.122665	0.128503	0.100354		0.0353974	0.137608	0.0794502
			11
			12
			13	273.953	269.883	259.803		27.189	0.0352128		44.63	0.0567509		35.787	0.0430013		0.0352128	0.0567509	0.0430013		0.0449883	0.0109057	0.00629659
			14
			15	223.338	292.727	293.751		-23.426	-0.0303393		67.474	0.085799		69.735	0.0837929		-0.0303393	0.085799	0.0837929		0.0464176	0.0664809	0.0383839
			16
			17
			18	160.645	341.932	154.306		-86.119	-0.111534		116.679	0.148367		-69.71	-0.0837629		-0.111534	0.148367	-0.0837629		-0.015643	0.142714	0.0823986
			20	270.224	201.995	235.301		23.46	0.0303833		-23.258	-0.0295746		11.285	0.01356		0.0303833	-0.0295746	0.01356		0.00478956	0.0309261	0.0178557

## Sheet: Figure 2e right panel
								Frequency
							Fibril Diameter (nm)	PRL+CSA	GAL+HEP	PRL+GAL
							1	0	1	0
							2	3	0	0
							3	4	0	0
							4	9	0	0
							5	35	6	0
							6	56	13	0
							7	107	18	3
							8	92	28	23
							9	80	40	126
							10	61	43	192
							11	30	66	113
							12	15	61	41
							13	8	72	2
							14	0	53	0
							15	0	40	0
							16	0	30	0
							17	0	14	0
							18	0	7	0
							19	0	5	0
							20	0	2	0
							21	0	1	0

## Sheet: Figure 2f left panel
							Fibril Diameter (nm)
						PRL+CSA	GAL+Hep	PRL+GAL
						9.36	13.52	10.73
						8.69	11.79	9.72
						8.58	8.55	8.61
						11.6	12.9	9.61
						7.48	11.26	9.48
						6.98	11.32	9.3
						9.81	13.05	8.93
						5.9	11.62	9.7
						6.19	11.49	12.05
						9.98	13.93	7.24
						7.12	11.86	9.97
						5.74	8.74	9.9
						8.32	10.71	11.98
						7.39	12.92	10.17
						5.15	11.74	9.9
						6.42	15.66	10.17
						7.53	15.94	10.47
						7.09	14.14	10.11
						8.27	10.6	9.25
						9.42	7.37	9.86
						5.32	13.45	9.05
						6.81	10.54	10.99
						8.96	4.98	8.11
						5.02	8.52	9.18
						6.83	10.63	9.02
						5.41	11.41	9.83
						6.68	8.79	9.22
						9.97	16.25	10.66
						4.11	6.05	12.03
						7.59	13.67	7.87
						7.82	8.5	8.96
						6.71	16.87	9.6
						7.35	9.8	11.07
						10.76	11.92	9.34
						9.49	15.42	11.13
						6.1	7.79	9.06
						6.6	14.08	10.37
						11.14	12.7	11.36
						9.78	12.77	9.16
						7.17	14.4	10.25
						6.39	4.77	10.71
						10.42	15.4	8.07
						8.66	10.21	9.65
						8.51	7.48	9.53
						10.62	10.72	9.29
						7.29	18.21	10.32
						9.24	11.36	8.13
						7.51	14.36	8.82
						7.97	8.82	9.03
						5.66	14.49	9.4
						8.13	15.01	8.53
						9.84	11.73	9.72
						5.91	11.58	9.52
						10.12	11.28	8.33
						7.28	17.17	10.72
						5.92	13.34	10.88
						9.25	15.42	10.67
						8.96	14.13	10.71
						7	11.62	10.39
						5.91	14.85	10.29
						8.47	13.64	9.99
						9.23	11.88	10.57
						6.71	9.99	11.01
						5.26	19.57	10.28
						5.36	11.91	10.42
						8.15	10.8	10.96
						9.98	10.14	10.02
						8.88	7.06	10.07
						6.61	12.34	10.38
						7.92	8.65	10.79
						8.75	11.3	9.77
						11.36	14.04	8.55
						6.3	10.9	10.71
						5.72	11.93	12.61
						9.8	7.78	9.38
						9.51	14.22	10.45
						5.44	12.14	9.74
						5.51	10.44	11.16
						7.95	14.44	9.84
						10.55	13.9	9.91
						3.22	12.22	9.69
						9.97	7.16	9.92
						12.44	7.08	10.53
						5.75	11.16	10.03
						6.64	17.01	10.77
						8.25	13.27	9.04
						10.02	16.3	12.3
						7.8	14.03	8.07
						11.46	8.51	10.98
						8.47	12.2	9.87
						9.52	5.72	10.92
						8.21	12.99	9.2
						13.23	10.35	8.98
						8.45	9.07	10.25
						11.86	10.05	9.69
						10.56	12.8	9.5
						6.99	12.03	10.94
						7.38	11.1	10.76
						11.23	12.15	11.03
						6.82	11.79	10.29
						8.03	17.23	11.66
						8.05	15.17	10.28
						5.6	11.85	10.43
						10.09	17.17	11.42
						9.87	14.53	9.07
						6.73	8.64	8.79
						8.64	9.77	9.17
						8.23	10.09	9.55
						7.41	15.9	10.29
						9.76	7.52	11.14
						8.5	10.02	9.9
						7	8.54	10.45
						8.97	13.01	9.52
						7.32	10.44	11.27
						6.98	17.21	9.75
						10.44	9.98	9
						6.59	15.27	10.76
						4.77	9.36	11.7
						6.07	8.82	10.5
						7.76	5.82	10.05
						8.79	15.02	10.6
						7.41	13.42	8.51
						11.7	11.36	9.68
						10.49	13.2	9.38
						8.77	6.24	10.1
						5.74	9.66	9.14
						7.29	12.19	11.09
						7.58	18.02	10.95
						7.25	12.37	10.53
						9.31	8.69	11.59
						7.07	15.19	9.26
						7.62	9.08	9.46
						8.1	16.22	10.83
						5.96	17.29	11.39
						8.37	13.27	10.39
						8.47	14.62	11.02
						8.71	5.49	10.69
						8.39	8.91	8.4
						7.1	14.07	9.91
						7.08	5.27	7.94
						4.15	12.88	11.34
						5.82	11.38	9.23
						5.87	18.75	10.87
						8.22	12.71	10.01
						7.17	4.88	9.61
						6.71	15.62	8.18
						9.63	17	9.88
						5.08	13.42	9.42
						7.87	14.96	10.02
						7.88	14.59	7.61
						4.01	14.51	10.21
						8.55	8.67	10.14
						7.42	13.49	10.1
						4.62	11.51	9.65
						6.18	16.31	10.15
						5.48	11.45	9.36
						6.17	10.69	9.28
						7.53	10.1	8.17
						7.31	9.47	9.7
						8.04	14.33	10.47
						6.9	12.59	8.82
						5.59	11.16	10.02
						8.77	16.67	10.5
						9.89	15.61	9.63
						11.88	12.83	9.5
						7.11	11.95	9.8
						11.56	9.62	12.04
						7.06	13.56	11.27
						11.99	9.47	10.71
						8.76	16.75	9.77
						8.65	7.94	11.09
						7.15	12.9	10.63
						6.46	13.88	9.38
						10.69	16.08	10.61
						7.36	12.8	10.57
						5.49	8.97	11.05
						11.31	8.98	9.48
						9.98	11.38	10.27
						7.72	15.44	9.42
						10.95	16.03	9.82
						12.5	11.35	8.93
						6.87	13.86	9.77
						8.18	7.61	9.97
						8.57	9.02	9.7
						9.23	13.47	11.47
						12.94	11.53	10.01
						12.76	7.19	10.48
						7.29	9.18	9.56
						6.74	14.65	9.07
						3.81	7.71	11.49
						8.59	12.31	10.01
						7.87	15.9	9.36
						4.58	9.12	9.89
						9.41	17.31	9.06
						7.04	4.65	11.25
						8.46	13.39	8.69
						11.04	11.72	9.35
						7.37	11.11	11.87
						8.97	19.97	10.87
						8.47	14.17	9.06
						9.29	18.18	11.01
						7.75	15.66	8.59
						10.18	12.12	11.44
						9.37	6.06	9.05
						6.94	7	10.13
						10.17	11.61	9.21
						7.27	12.26	9.95
						10.07	8.61	11
						11.24	10.28	8.67
						9.7	9.87	10.11
						7.4	8.43	9.43
						8.05	14.25	9.79
						6.64	11.16	10.96
						8.58	9.68	9.83
						6.71	13.63	11.55
						9.4	11.09	9.6
						7.56	12.06	9.99
						7.39	13.84	8.58
						8.17	11.53	8.52
						6.14	11.16	9.68
						8.97	10.26	10.04
						9.95	12.72	9.93
						7.54	11.77	9.5
						8.77	14.93	10.7
						7.57	9.69	9.64
						7.72	6.04	9.94
						8.54	13.35	9.32
						8.17	14.13	10.81
						6.27	10.16	10.32
						7.58	17.85	9.29
						6.72	7.79	8.65
						5.74	18.57	9.41
						7.11	12.51	9.74
						6.07	15.63	10.68
						13.31	14.39	10.38
						6.88	9.59	12.06
						9.56	14.99	9.74
						7.67	11.79	10.7
						7.77	14.93	10.55
						10.42	17.62	9.56
						7.84	16.85	10.77
						8.75	18.38	8.46
						12.24	11.56	10.41
						6.75	15.52	8.98
						7.38	15.93	8.3
						5.85	7.21	9.42
						10.51	6.1	10.03
						8.79	15.92	8.03
						9.55	6.77	10.71
						1.83	14.1	11.8
						8.26	14.12	9.72
						4.61	9.72	9.2
						3.28	8.94	9.71
						7.41	6.06	9.44
						9.19	14.34	8.75
						10.07	6.48	9.18
						7.86	12.27	9.18
						7.74	14.09	9.95
						9.43	15.86	8.65
						5.56	7.19	9.42
						3.92	13.59	9.18
						5.21	11.42	11.13
						9.1	13.2	10.91
						8.08	14.64	10.77
						8.64	14.26	8.57
						9.5	6.96	13.05
						7.46	11.41	10.98
						8.28	12.83	7.1
						8.33	11.02	10.84
						4.66	5.91	8.76
						5.85	11.95	10.47
						5.84	11.8	9.44
						6.92	10.71	9.36
						7.71	14.53	8.67
						7.98	8.09	9.93
						6	13.17	10.12
						10.1	5.5	11.14
						6.88	16.05	10.58
						8.49	12.81	9.35
						9.83	15.59	10.04
						9.05	7.66	9.87
						7.72	13.22	9.56
						7.14	18.25	11.68
						7.32	12.52	10.33
						6.21	11.43	10.63
						7.61	10.02	9.5
						2.18	14.8	10.03
						8.14	11.33	10.06
						9.08	15.74	8.66
						9.36	11.97	9.74
						9.06	19.25	11.38
						11.4	7.43	8.9
						7.71	13.22	9.79
						6.26	11.25	9.73
						10.44	13.93	10.8
						12.54	14.16	9.48
						8.57	12.72	10.99
						5.33	7.86	9.03
						8.97	14.6	10.2
						7.64	10.86	8.9
						6.88	13.48	9.62
						5.93	7.66	9.8
						7.38	11.92	9.35
						8.28	9.73	7.89
						2.26	14.74	9.87
						12.13	16.4	9.43
						11.48	6.75	9.92
						7.7	14.58	9.52
						5.36	15.84	9.87
						6.44	13.73	9.3
						7.37	7.59	9.17
						3.61	15.55	9.59
						4.78	12.42	9.73
						10.53	12.68	11.52
						8.54	12.92	10.77
						10.82	13.07	10.1
						5.57	12.18	9.09
						7.48	14.28	9.74
						4.54	11.41	10.83
						6.2	11.71	11.91
						9.56	11.69	9.33
						9	13.29	11.08
						10.78	15.13	9.96
						12.57	7.71	10.79
						7.75	16.99	10.75
						6.82	12	9.82
						4.92	18.85	10.17
						10.87	9.13	11.58
						9.08	10.63	10.06
						10.15	14.15	11.44
						8.89	9.24	11.82
						8.55	15.31	10.62
						10.24	9.35	10.26
						5.29	14.45	10.35
						7.29	10.35	8.44
						9.86	8.3	8.55
						8.73	10.68	9.22
						9.64	12.66	9.5
						7.73	12.9	9.62
						4.53	12.79	10.39
						6.22	8.77	11.15
						7.93	10.37	9.78
						8.73	9.28	10.21
						4.46	1.45	9.55
						5.77	9.37	10.25
						6.6	9.63	10.72
						9.91	10.92	9.32
						10.34	12.36	11.18
						9.69	14.93	11.78
						5.47	8.27	8.6
						11.67	11.4	11.12
						8.37	13.68	9.07
						7.39	11.28	11.63
						5.25	7.52	9.4
						8.97	12.54	10.25
						7.45	12.21	9.21
						7.69	10.9	9.52
						7.7	12.17	8.07
						9.24	13.26	10.63
						6.1	16.22	11.45
						8.61	11.96	11.09
						7.33	7.73	8.98
						7.94	11.12	10.06
						7.79	8.36	9.46
						7	6.64	11.75
						9.52	9.8	10.87
						5.51	7.5	8.99
						8.09	9.65	12.06
						10.06	11.82	12.18
						7.37	14.43	10.1
						11.01	12.25	10.46
						9.06	14.67	8.53
						8.01	10.89	9.26
						8.75	10.69	10.54
						9.97	9.04	9.81
						7.46	13.7	9.85
						7.71	11.25	10.32
						7.27	15.53	9.44
						6.49	11.64	9.65
						4.93	15.32	10.74
						11.02	9.9	9.1
						6.72	12.98	9.88
						6.03	10.1	9.17
						9.84	14.79	8.54
						12.31	7.54	8.4
						8.62	11.86	9.59
						10.63	6.59	9.51
						7.45	9.79	11.82
						9.09	13.12	8.17
						10.13	12.54	11.64
						6.04	14.77	9.88
						11.67	11.21	9.39
						6.98	7.86	10.28
						7.13	12.92	10.33
						9.48	14.14	9.58
						7.41	7.44	11.55
						5.35	15.2	9.62
						8.42	14.06	11.38
						11.55	10.73	10.48
						8.1	13.39	11.64
						6.82	9.93	12.22
						5.45	12.92	11.5
						4.95	14.58	10.14
						12.57	9.55	10.58
						6.02	12.76	11.06
						9.25	18.98	9.51
						6.96	16.34	10.95
						7.23	11.32	10.01
						10.24	12.52	10.21
						6.93	9.38	11.34
						9.05	13.02	10.34
						9.04	11.09	12.29
						9.67	12.08	11.31
						11.9	13.45	8.8
						11.79	13.98	11.87
						5.16	5.82	9.86
						3.74	10.7	9.39
						8.12	11.11	11.77
						9.08	10.26	11.71
						7.85	14.85	9.65
						8.69	12.95	9.74
						7	9.08	10.32
						6.74	11.55	9.79
						7.82	13.13	10.33
						9.73	12.56	9
						9.97	10.82	8.4
						10.13	9.38	11.53
						4.82	11.33	9.8
						5.65	11.03	7.32
						8.13	12.53	10.11
						6.87	9.07	10.43
						5.23	10.84	9.39
						8.41	10.83	9.56
						9.38	10.35	10.5
						7.49	12.33	10.29
						8.5	7.43	10.67
						8.95	13.3	10.5
						7.2	6.76	9.6
						6.07	8.12	10.67
						6.61	14.54	10.26
						7.55	12.5	8.55
						5.77	13.27	8.8
						7.48	15.66	8.58
						6.94	9.78	10.44
						9.18	14.53	9.46
						9.59	10.86	9.84
						10.46	15.7	11.29
						7.81	12.85	11.5
						9.14	10.85	8.73
						6.57	13.88	9.94
						10.95	10.98	10.09
						5.82	12.54	10.5
						8.01	10.06	9.79
						8.52	13.44	10.52
						5.29	11.34	9.95
						5.56	8.28	8.34
						6.33	16.68	8.13
						5.46	11.54	11.91
						5.9	12.71	10.84
						11.2	11.26	8.81
						7.15	14.43	9.21
						6.93	11.34	10.88
						10.69	13.45	10.66
						3.26	11.23	9.22
						11.23	16.18	9.75
						8.43	12.06	9.37
						10.77	9.76	8.91
						6.81	11.81	9.82
						3.42	13.64	10.73
						7.29	10.57	10.14
						7.13	5.64	10.31
						7.52	13.45	10.44
						8.02	7.89	10.02
						9.72	10.15	8.99
						6.39	7.95	11.06
						9.32	9	8.31
						8.53	10.48	11.5
						9.65	12.06	8.93
						8.98	14.52	9.19
						9.99	14.29	11.71
						6.73	12.56	9.48
						8	13.64	9.43
						6.87	15.48	11
						7.32	12.7	10.69
						8.47	13.75	12.17
						7.6	8.99	9.42
						6.47	7.85	9.95
						3.74	13.51	8.72
						5.42	12.66	9.59
						9.11	13.98	8.91
						9.63	15.21	9.87
						7.07	11.85	11.61
						10.17	9.84	8.93
						7.43	20.63	11.83
						9.69	12.09	9.99
						10.35	13.98	11.07
						7.19	9.29	9.28
						11.35	11.03	11.04
						11.48	8.34	10.68
						9.24	12.94	11.56

## Sheet: Figure 2f right panel
								Fibril Diameter (nm)
							PRL+CSA	GAL+Hep	PRL+GAL				PRL+CSA	GAL+Hep	PRL+GAL
							9.36	13.52	10.73			Mean	7.98406	11.9512	10.0147
							8.69	11.79	9.72			Std Error	0.0888829	0.135053	0.0440445
							8.58	8.55	8.61
							11.6	12.9	9.61
							7.48	11.26	9.48				PRL+CSA to GAL-Hep		PRL-CSA to PRL-GAL
							6.98	11.32	9.3			p values	0.0001		0.0001
							9.81	13.05	8.93				***		***
							5.9	11.62	9.7
							6.19	11.49	12.05
							9.98	13.93	7.24
							7.12	11.86	9.97
							5.74	8.74	9.9
							8.32	10.71	11.98
							7.39	12.92	10.17
							5.15	11.74	9.9
							6.42	15.66	10.17
							7.53	15.94	10.47
							7.09	14.14	10.11
							8.27	10.6	9.25
							9.42	7.37	9.86
							5.32	13.45	9.05
							6.81	10.54	10.99
							8.96	4.98	8.11
							5.02	8.52	9.18
							6.83	10.63	9.02
							5.41	11.41	9.83
							6.68	8.79	9.22
							9.97	16.25	10.66
							4.11	6.05	12.03
							7.59	13.67	7.87
							7.82	8.5	8.96
							6.71	16.87	9.6
							7.35	9.8	11.07
							10.76	11.92	9.34
							9.49	15.42	11.13
							6.1	7.79	9.06
							6.6	14.08	10.37
							11.14	12.7	11.36
							9.78	12.77	9.16
							7.17	14.4	10.25
							6.39	4.77	10.71
							10.42	15.4	8.07
							8.66	10.21	9.65
							8.51	7.48	9.53
							10.62	10.72	9.29
							7.29	18.21	10.32
							9.24	11.36	8.13
							7.51	14.36	8.82
							7.97	8.82	9.03
							5.66	14.49	9.4
							8.13	15.01	8.53
							9.84	11.73	9.72
							5.91	11.58	9.52
							10.12	11.28	8.33
							7.28	17.17	10.72
							5.92	13.34	10.88
							9.25	15.42	10.67
							8.96	14.13	10.71
							7	11.62	10.39
							5.91	14.85	10.29
							8.47	13.64	9.99
							9.23	11.88	10.57
							6.71	9.99	11.01
							5.26	19.57	10.28
							5.36	11.91	10.42
							8.15	10.8	10.96
							9.98	10.14	10.02
							8.88	7.06	10.07
							6.61	12.34	10.38
							7.92	8.65	10.79
							8.75	11.3	9.77
							11.36	14.04	8.55
							6.3	10.9	10.71
							5.72	11.93	12.61
							9.8	7.78	9.38
							9.51	14.22	10.45
							5.44	12.14	9.74
							5.51	10.44	11.16
							7.95	14.44	9.84
							10.55	13.9	9.91
							3.22	12.22	9.69
							9.97	7.16	9.92
							12.44	7.08	10.53
							5.75	11.16	10.03
							6.64	17.01	10.77
							8.25	13.27	9.04
							10.02	16.3	12.3
							7.8	14.03	8.07
							11.46	8.51	10.98
							8.47	12.2	9.87
							9.52	5.72	10.92
							8.21	12.99	9.2
							13.23	10.35	8.98
							8.45	9.07	10.25
							11.86	10.05	9.69
							10.56	12.8	9.5
							6.99	12.03	10.94
							7.38	11.1	10.76
							11.23	12.15	11.03
							6.82	11.79	10.29
							8.03	17.23	11.66
							8.05	15.17	10.28
							5.6	11.85	10.43
							10.09	17.17	11.42
							9.87	14.53	9.07
							6.73	8.64	8.79
							8.64	9.77	9.17
							8.23	10.09	9.55
							7.41	15.9	10.29
							9.76	7.52	11.14
							8.5	10.02	9.9
							7	8.54	10.45
							8.97	13.01	9.52
							7.32	10.44	11.27
							6.98	17.21	9.75
							10.44	9.98	9
							6.59	15.27	10.76
							4.77	9.36	11.7
							6.07	8.82	10.5
							7.76	5.82	10.05
							8.79	15.02	10.6
							7.41	13.42	8.51
							11.7	11.36	9.68
							10.49	13.2	9.38
							8.77	6.24	10.1
							5.74	9.66	9.14
							7.29	12.19	11.09
							7.58	18.02	10.95
							7.25	12.37	10.53
							9.31	8.69	11.59
							7.07	15.19	9.26
							7.62	9.08	9.46
							8.1	16.22	10.83
							5.96	17.29	11.39
							8.37	13.27	10.39
							8.47	14.62	11.02
							8.71	5.49	10.69
							8.39	8.91	8.4
							7.1	14.07	9.91
							7.08	5.27	7.94
							4.15	12.88	11.34
							5.82	11.38	9.23
							5.87	18.75	10.87
							8.22	12.71	10.01
							7.17	4.88	9.61
							6.71	15.62	8.18
							9.63	17	9.88
							5.08	13.42	9.42
							7.87	14.96	10.02
							7.88	14.59	7.61
							4.01	14.51	10.21
							8.55	8.67	10.14
							7.42	13.49	10.1
							4.62	11.51	9.65
							6.18	16.31	10.15
							5.48	11.45	9.36
							6.17	10.69	9.28
							7.53	10.1	8.17
							7.31	9.47	9.7
							8.04	14.33	10.47
							6.9	12.59	8.82
							5.59	11.16	10.02
							8.77	16.67	10.5
							9.89	15.61	9.63
							11.88	12.83	9.5
							7.11	11.95	9.8
							11.56	9.62	12.04
							7.06	13.56	11.27
							11.99	9.47	10.71
							8.76	16.75	9.77
							8.65	7.94	11.09
							7.15	12.9	10.63
							6.46	13.88	9.38
							10.69	16.08	10.61
							7.36	12.8	10.57
							5.49	8.97	11.05
							11.31	8.98	9.48
							9.98	11.38	10.27
							7.72	15.44	9.42
							10.95	16.03	9.82
							12.5	11.35	8.93
							6.87	13.86	9.77
							8.18	7.61	9.97
							8.57	9.02	9.7
							9.23	13.47	11.47
							12.94	11.53	10.01
							12.76	7.19	10.48
							7.29	9.18	9.56
							6.74	14.65	9.07
							3.81	7.71	11.49
							8.59	12.31	10.01
							7.87	15.9	9.36
							4.58	9.12	9.89
							9.41	17.31	9.06
							7.04	4.65	11.25
							8.46	13.39	8.69
							11.04	11.72	9.35
							7.37	11.11	11.87
							8.97	19.97	10.87
							8.47	14.17	9.06
							9.29	18.18	11.01
							7.75	15.66	8.59
							10.18	12.12	11.44
							9.37	6.06	9.05
							6.94	7	10.13
							10.17	11.61	9.21
							7.27	12.26	9.95
							10.07	8.61	11
							11.24	10.28	8.67
							9.7	9.87	10.11
							7.4	8.43	9.43
							8.05	14.25	9.79
							6.64	11.16	10.96
							8.58	9.68	9.83
							6.71	13.63	11.55
							9.4	11.09	9.6
							7.56	12.06	9.99
							7.39	13.84	8.58
							8.17	11.53	8.52
							6.14	11.16	9.68
							8.97	10.26	10.04
							9.95	12.72	9.93
							7.54	11.77	9.5
							8.77	14.93	10.7
							7.57	9.69	9.64
							7.72	6.04	9.94
							8.54	13.35	9.32
							8.17	14.13	10.81
							6.27	10.16	10.32
							7.58	17.85	9.29
							6.72	7.79	8.65
							5.74	18.57	9.41
							7.11	12.51	9.74
							6.07	15.63	10.68
							13.31	14.39	10.38
							6.88	9.59	12.06
							9.56	14.99	9.74
							7.67	11.79	10.7
							7.77	14.93	10.55
							10.42	17.62	9.56
							7.84	16.85	10.77
							8.75	18.38	8.46
							12.24	11.56	10.41
							6.75	15.52	8.98
							7.38	15.93	8.3
							5.85	7.21	9.42
							10.51	6.1	10.03
							8.79	15.92	8.03
							9.55	6.77	10.71
							1.83	14.1	11.8
							8.26	14.12	9.72
							4.61	9.72	9.2
							3.28	8.94	9.71
							7.41	6.06	9.44
							9.19	14.34	8.75
							10.07	6.48	9.18
							7.86	12.27	9.18
							7.74	14.09	9.95
							9.43	15.86	8.65
							5.56	7.19	9.42
							3.92	13.59	9.18
							5.21	11.42	11.13
							9.1	13.2	10.91
							8.08	14.64	10.77
							8.64	14.26	8.57
							9.5	6.96	13.05
							7.46	11.41	10.98
							8.28	12.83	7.1
							8.33	11.02	10.84
							4.66	5.91	8.76
							5.85	11.95	10.47
							5.84	11.8	9.44
							6.92	10.71	9.36
							7.71	14.53	8.67
							7.98	8.09	9.93
							6	13.17	10.12
							10.1	5.5	11.14
							6.88	16.05	10.58
							8.49	12.81	9.35
							9.83	15.59	10.04
							9.05	7.66	9.87
							7.72	13.22	9.56
							7.14	18.25	11.68
							7.32	12.52	10.33
							6.21	11.43	10.63
							7.61	10.02	9.5
							2.18	14.8	10.03
							8.14	11.33	10.06
							9.08	15.74	8.66
							9.36	11.97	9.74
							9.06	19.25	11.38
							11.4	7.43	8.9
							7.71	13.22	9.79
							6.26	11.25	9.73
							10.44	13.93	10.8
							12.54	14.16	9.48
							8.57	12.72	10.99
							5.33	7.86	9.03
							8.97	14.6	10.2
							7.64	10.86	8.9
							6.88	13.48	9.62
							5.93	7.66	9.8
							7.38	11.92	9.35
							8.28	9.73	7.89
							2.26	14.74	9.87
							12.13	16.4	9.43
							11.48	6.75	9.92
							7.7	14.58	9.52
							5.36	15.84	9.87
							6.44	13.73	9.3
							7.37	7.59	9.17
							3.61	15.55	9.59
							4.78	12.42	9.73
							10.53	12.68	11.52
							8.54	12.92	10.77
							10.82	13.07	10.1
							5.57	12.18	9.09
							7.48	14.28	9.74
							4.54	11.41	10.83
							6.2	11.71	11.91
							9.56	11.69	9.33
							9	13.29	11.08
							10.78	15.13	9.96
							12.57	7.71	10.79
							7.75	16.99	10.75
							6.82	12	9.82
							4.92	18.85	10.17
							10.87	9.13	11.58
							9.08	10.63	10.06
							10.15	14.15	11.44
							8.89	9.24	11.82
							8.55	15.31	10.62
							10.24	9.35	10.26
							5.29	14.45	10.35
							7.29	10.35	8.44
							9.86	8.3	8.55
							8.73	10.68	9.22
							9.64	12.66	9.5
							7.73	12.9	9.62
							4.53	12.79	10.39
							6.22	8.77	11.15
							7.93	10.37	9.78
							8.73	9.28	10.21
							4.46	1.45	9.55
							5.77	9.37	10.25
							6.6	9.63	10.72
							9.91	10.92	9.32
							10.34	12.36	11.18
							9.69	14.93	11.78
							5.47	8.27	8.6
							11.67	11.4	11.12
							8.37	13.68	9.07
							7.39	11.28	11.63
							5.25	7.52	9.4
							8.97	12.54	10.25
							7.45	12.21	9.21
							7.69	10.9	9.52
							7.7	12.17	8.07
							9.24	13.26	10.63
							6.1	16.22	11.45
							8.61	11.96	11.09
							7.33	7.73	8.98
							7.94	11.12	10.06
							7.79	8.36	9.46
							7	6.64	11.75
							9.52	9.8	10.87
							5.51	7.5	8.99
							8.09	9.65	12.06
							10.06	11.82	12.18
							7.37	14.43	10.1
							11.01	12.25	10.46
							9.06	14.67	8.53
							8.01	10.89	9.26
							8.75	10.69	10.54
							9.97	9.04	9.81
							7.46	13.7	9.85
							7.71	11.25	10.32
							7.27	15.53	9.44
							6.49	11.64	9.65
							4.93	15.32	10.74
							11.02	9.9	9.1
							6.72	12.98	9.88
							6.03	10.1	9.17
							9.84	14.79	8.54
							12.31	7.54	8.4
							8.62	11.86	9.59
							10.63	6.59	9.51
							7.45	9.79	11.82
							9.09	13.12	8.17
							10.13	12.54	11.64
							6.04	14.77	9.88
							11.67	11.21	9.39
							6.98	7.86	10.28
							7.13	12.92	10.33
							9.48	14.14	9.58
							7.41	7.44	11.55
							5.35	15.2	9.62
							8.42	14.06	11.38
							11.55	10.73	10.48
							8.1	13.39	11.64
							6.82	9.93	12.22
							5.45	12.92	11.5
							4.95	14.58	10.14
							12.57	9.55	10.58
							6.02	12.76	11.06
							9.25	18.98	9.51
							6.96	16.34	10.95
							7.23	11.32	10.01
							10.24	12.52	10.21
							6.93	9.38	11.34
							9.05	13.02	10.34
							9.04	11.09	12.29
							9.67	12.08	11.31
							11.9	13.45	8.8
							11.79	13.98	11.87
							5.16	5.82	9.86
							3.74	10.7	9.39
							8.12	11.11	11.77
							9.08	10.26	11.71
							7.85	14.85	9.65
							8.69	12.95	9.74
							7	9.08	10.32
							6.74	11.55	9.79
							7.82	13.13	10.33
							9.73	12.56	9
							9.97	10.82	8.4
							10.13	9.38	11.53
							4.82	11.33	9.8
							5.65	11.03	7.32
							8.13	12.53	10.11
							6.87	9.07	10.43
							5.23	10.84	9.39
							8.41	10.83	9.56
							9.38	10.35	10.5
							7.49	12.33	10.29
							8.5	7.43	10.67
							8.95	13.3	10.5
							7.2	6.76	9.6
							6.07	8.12	10.67
							6.61	14.54	10.26
							7.55	12.5	8.55
							5.77	13.27	8.8
							7.48	15.66	8.58
							6.94	9.78	10.44
							9.18	14.53	9.46
							9.59	10.86	9.84
							10.46	15.7	11.29
							7.81	12.85	11.5
							9.14	10.85	8.73
							6.57	13.88	9.94
							10.95	10.98	10.09
							5.82	12.54	10.5
							8.01	10.06	9.79
							8.52	13.44	10.52
							5.29	11.34	9.95
							5.56	8.28	8.34
							6.33	16.68	8.13
							5.46	11.54	11.91
							5.9	12.71	10.84
							11.2	11.26	8.81
							7.15	14.43	9.21
							6.93	11.34	10.88
							10.69	13.45	10.66
							3.26	11.23	9.22
							11.23	16.18	9.75
							8.43	12.06	9.37
							10.77	9.76	8.91
							6.81	11.81	9.82
							3.42	13.64	10.73
							7.29	10.57	10.14
							7.13	5.64	10.31
							7.52	13.45	10.44
							8.02	7.89	10.02
							9.72	10.15	8.99
							6.39	7.95	11.06
							9.32	9	8.31
							8.53	10.48	11.5
							9.65	12.06	8.93
							8.98	14.52	9.19
							9.99	14.29	11.71
							6.73	12.56	9.48
							8	13.64	9.43
							6.87	15.48	11
							7.32	12.7	10.69
							8.47	13.75	12.17
							7.6	8.99	9.42
							6.47	7.85	9.95
							3.74	13.51	8.72
							5.42	12.66	9.59
							9.11	13.98	8.91
							9.63	15.21	9.87
							7.07	11.85	11.61
							10.17	9.84	8.93
							7.43	20.63	11.83
							9.69	12.09	9.99
							10.35	13.98	11.07
							7.19	9.29	9.28
							11.35	11.03	11.04
							11.48	8.34	10.68
							9.24	12.94	11.56
