# Supplementary material for: Co-aggregation and secondary nucleation in the life cycle of human prolactin/galanin functional amyloids
Source: eLife. 2022 Mar 8;11:e73835. doi: 10.7554/eLife.73835 (PMC8993219; doi:10.7554/eLife.73835)
Supplement: Figure 3—figure supplement 1—source data 1. [file elife-73835-fig3-figsupp1-data1.xlsx]

## Sheet: Fig 3-fig sup1b
						GAL + 5% GAL			GAL+Hep			GAL+5% PRL
						Fibril Diameter	Frequency		Fibril Diameter	Freq		Fibril Diameter	Freq
						0	0		7.1	1		1.4	1
						2	2		7.2	1		1.5	0
						4	11		7.3	1		1.6	0
						6	19		7.4	0		1.7	0
						8	18		7.5	0		1.8	0
						10	25		7.6	1		1.9	0
						12	25		7.7	0		2	0
						14	25		7.8	0		2.1	0
						16	15		7.9	3		2.2	0
						18	21		8	1		2.3	0
						20	14		8.1	6		2.4	0
						22	2		8.2	3		2.5	0
						24	6		8.3	4		2.6	0
						26	1		8.4	4		2.7	0
						28	1		8.5	6		2.8	0
						30	1		8.6	9		2.9	0
						32	1		8.7	8		3	0
									8.8	8		3.1	0
									8.9	8		3.2	0
									9	12		3.3	0
									9.1	11		3.4	0
									9.2	18		3.5	0
									9.3	13		3.6	0
									9.4	27		3.7	0
									9.5	19		3.8	0
									9.6	20		3.9	0
									9.7	23		4	0
									9.8	21		4.1	0
									9.9	23		4.2	0
									10	23		4.3	0
									10.1	18		4.4	0
									10.2	8		4.5	0
									10.3	23		4.6	0
									10.4	13		4.7	1
									10.5	17		4.8	1
									10.6	11		4.9	1
									10.7	21		5	1
									10.8	15		5.1	0
									10.9	8		5.2	0
									11	15		5.3	1
									11.1	14		5.4	0
									11.2	3		5.5	2
									11.3	7		5.6	1
									11.4	7		5.7	1
									11.5	8		5.8	2
									11.6	9		5.9	1
									11.7	5		6	1
									11.8	7		6.1	4
									11.9	4		6.2	1
									12	3		6.3	0
									12.1	3		6.4	0
									12.2	3		6.5	1
									12.3	2		6.6	2
									12.4	0		6.7	0
									12.5	0		6.8	3
									12.6	1		6.9	0
									12.7	0		7	2
									12.8	0		7.1	2
									12.9	0		7.2	4
									13	0		7.3	0
									13.1	1		7.4	4
												7.5	5
												7.6	2
												7.7	5
												7.8	3
												7.9	5
												8	1
												8.1	2
												8.2	0
												8.3	4
												8.4	2
												8.5	4
												8.6	3
												8.7	4
												8.8	4
												8.9	2
												9	6
												9.1	6
												9.2	2
												9.3	2
												9.4	5
												9.5	2
												9.6	4
												9.7	6
												9.8	7
												9.9	3
												10	4
												10.1	6
												10.2	3
												10.3	3
												10.4	6
												10.5	2
												10.6	4
												10.7	8
												10.8	4
												10.9	7
												11	4
												11.1	6
												11.2	6
												11.3	13
												11.4	11
												11.5	6
												11.6	7
												11.7	5
												11.8	7
												11.9	9
												12	6
												12.1	7
												12.2	7
												12.3	6
												12.4	3
												12.5	8
												12.6	3
												12.7	9
												12.8	8
												12.9	10
												13	5
												13.1	4
												13.2	5
												13.3	7
												13.4	6
												13.5	9
												13.6	6
												13.7	4
												13.8	2
												13.9	6
												14	5
												14.1	10
												14.2	4
												14.3	6
												14.4	6
												14.5	8
												14.6	6
												14.7	3
												14.8	3
												14.9	5
												15	4
												15.1	1
												15.2	4
												15.3	3
												15.4	4
												15.5	3
												15.6	5
												15.7	5
												15.8	1
												15.9	6
												16	1
												16.1	2
												16.2	3
												16.3	4
												16.4	1
												16.5	0
												16.6	0
												16.7	2
												16.8	1
												16.9	2
												17	3
												17.1	0
												17.2	4
												17.3	2
												17.4	0
												17.5	0
												17.6	1
												17.7	0
												17.8	0
												17.9	1
												18	1
												18.1	0
												18.2	2
												18.3	1
												18.4	1
												18.5	0
												18.6	1
												18.7	0
												18.8	1
												18.9	1
												19	1
												19.1	0
												19.2	0
												19.3	1
												19.4	0
												19.5	0
												19.6	1
												19.7	0
												19.8	0
												19.9	0
												20	1
												20.1	0
												20.2	0
												20.3	0
												20.4	0
												20.5	0
												20.6	1

## Sheet: Fig 3-fig sup1c 5% PRL
								5% PRL
						Wavelength (nm)	Day 0	Day 2	Day 4	Day 6	Day 8	Day 10
						260	0	0	0	0	0	0
						259	-0.021457	-0.023257	-0.0136	-0.03186	-0.0095595	-0.011095
						258	-0.040502	-0.051137	-0.042693	-0.069424	-0.020484	-0.026261
						257	-0.066197	-0.07277	-0.083863	-0.10998	-0.029083	-0.051662
						256	-0.078189	-0.077173	-0.11052	-0.14031	-0.026826	-0.063602
						255	-0.093114	-0.074137	-0.13335	-0.159	-0.023286	-0.073672
						254	-0.11146	-0.064769	-0.14946	-0.16244	-0.016398	-0.081566
						253	-0.13753	-0.066219	-0.17169	-0.16022	-0.01832	-0.088021
						252	-0.17704	-0.081654	-0.1993	-0.15373	-0.030811	-0.097984
						251	-0.2256	-0.11408	-0.2355	-0.15276	-0.065974	-0.11719
						250	-0.28698	-0.16374	-0.2877	-0.17471	-0.11531	-0.14663
						249	-0.36908	-0.23862	-0.34817	-0.22875	-0.18464	-0.20334
						248	-0.44031	-0.30398	-0.3912	-0.2922	-0.24844	-0.2515
						247	-0.52057	-0.39778	-0.43233	-0.3627	-0.31932	-0.30119
						246	-0.60801	-0.50473	-0.49024	-0.44813	-0.41124	-0.37878
						245	-0.70633	-0.62961	-0.57767	-0.5613	-0.52325	-0.48507
						244	-0.80922	-0.7713	-0.70383	-0.70927	-0.65681	-0.6318
						243	-0.93226	-0.92432	-0.86827	-0.88474	-0.82571	-0.80854
						242	-1.0837	-1.102	-1.0551	-1.0792	-1.0208	-1.0049
						241	-1.3052	-1.3318	-1.2898	-1.334	-1.2673	-1.2648
						240	-1.5964	-1.6168	-1.5816	-1.6419	-1.5732	-1.5758
						239	-1.9827	-1.9932	-1.9599	-2.0212	-1.9713	-1.9646
						238	-2.4503	-2.4287	-2.4044	-2.4491	-2.4338	-2.4201
						237	-2.9976	-2.9493	-2.9336	-2.9476	-2.9707	-2.957
						236	-3.6409	-3.5413	-3.543	-3.5321	-3.5821	-3.5557
						235	-4.3518	-4.1954	-4.2097	-4.1977	-4.2599	-4.2273
						234	-5.1074	-4.9014	-4.916	-4.8965	-4.9741	-4.9248
						233	-5.9139	-5.6568	-5.6722	-5.6287	-5.7312	-5.6658
						232	-6.7377	-6.4561	-6.4757	-6.3921	-6.523	-6.4556
						231	-7.5712	-7.2927	-7.3216	-7.1882	-7.3266	-7.2671
						230	-8.4157	-8.165	-8.2002	-8.0197	-8.1513	-8.1124
						229	-9.2681	-9.0618	-9.0957	-8.8642	-9.0017	-8.9631
						228	-10.102	-9.9256	-9.9649	-9.6895	-9.8209	-9.7937
						227	-10.883	-10.748	-10.778	-10.476	-10.585	-10.571
						226	-11.568	-11.485	-11.51	-11.194	-11.274	-11.281
						225	-12.139	-12.109	-12.125	-11.797	-11.831	-11.857
						224	-12.588	-12.6	-12.589	-12.285	-12.27	-12.317
						223	-12.931	-12.973	-12.929	-12.668	-12.612	-12.654
						222	-13.199	-13.224	-13.157	-12.95	-12.874	-12.916
						221	-13.335	-13.333	-13.244	-13.105	-13.021	-13.069
						220	-13.366	-13.341	-13.244	-13.17	-13.056	-13.134
						219	-13.336	-13.28	-13.163	-13.18	-13.038	-13.154
						218	-13.26	-13.214	-13.055	-13.135	-13.006	-13.144
						217	-13.191	-13.155	-12.96	-13.068	-12.984	-13.121
						216	-13.163	-13.139	-12.925	-13.045	-13.016	-13.121
						215	-13.231	-13.176	-13.019	-13.134	-13.123	-13.184
						214	-13.364	-13.292	-13.212	-13.324	-13.344	-13.35
						213	-13.574	-13.533	-13.511	-13.562	-13.631	-13.571
						212	-13.808	-13.858	-13.838	-13.84	-13.924	-13.819
						211	-14.042	-14.201	-14.191	-14.087	-14.122	-14.024
						210	-14.173	-14.421	-14.41	-14.266	-14.198	-14.176
						209	-14.191	-14.405	-14.483	-14.319	-14.123	-14.188
						208	-14.039	-14.095	-14.329	-14.19	-13.859	-14.055
						207	-13.574	-13.342	-13.778	-13.816	-13.243	-13.587
						206	-12.53	-12.292	-12.756	-12.881	-12.227	-12.691
						205	-10.902	-10.634	-11.068	-11.228	-10.686	-10.948
						204	-8.7565	-8.4765	-8.7887	-8.8687	-8.571	-8.6953
						203	-6.2985	-5.9947	-6.127	-6.0605	-6.0802	-6.1263
						202	-3.7183	-3.3956	-3.3192	-3.0612	-3.4162	-3.4488
						201	-1.2233	-0.87958	-0.5834	-0.10542	-0.80685	-0.87668
						200	1.0557	1.3532	1.9438	2.6628	1.5666	1.4192
						199	2.9759	3.1847	4.1033	5.123	3.6424	3.3698
						198	4.4828	4.5622	5.8263	7.128	5.3459	4.8734

## Sheet: Fig 3-fig sup1c PRL
									PRL
							Wavelength (nm)	Day 0	Day 2	Day 4	Day 6	Day 8	Day 10
							260	0	0	0	0	0	0
							259	0.013815	0.011907	0.015037	0.007021	-0.010382	0.003844
							258	0.033258	0.021093	0.024358	0.010777	-0.016483	0.0024195
							257	0.040824	0.026273	0.015523	-0.0011675	-0.016327	0.0029355
							256	0.043538	0.034132	0.0073329	-0.01105	-0.005372	0.0071145
							255	0.035259	0.02035	-0.010549	-0.028279	0.009879	0.0084005
							254	0.020672	-0.0087211	-0.043431	-0.049206	0.03732	0.0080475
							253	-0.0004829	-0.050768	-0.088951	-0.073793	0.067588	-0.00231
							252	-0.024902	-0.10407	-0.14566	-0.11132	0.09054	-0.016836
							251	-0.059292	-0.14322	-0.17916	-0.12925	0.11304	-0.026119
							250	-0.097181	-0.17558	-0.19792	-0.14475	0.10179	-0.041921
							249	-0.13834	-0.19525	-0.20405	-0.16113	0.075804	-0.05974
							248	-0.17048	-0.21207	-0.19861	-0.17488	0.013229	-0.11312
							247	-0.22582	-0.24377	-0.21151	-0.2017	-0.066697	-0.17963
							246	-0.30272	-0.30538	-0.24617	-0.25943	-0.16762	-0.27279
							245	-0.4231	-0.4016	-0.33103	-0.36821	-0.28665	-0.37942
							244	-0.58479	-0.54481	-0.46262	-0.53247	-0.44927	-0.54397
							243	-0.80984	-0.7409	-0.65211	-0.75462	-0.66183	-0.73427
							242	-1.091	-0.99692	-0.88627	-1.0223	-0.92125	-0.96806
							241	-1.4372	-1.3305	-1.1941	-1.3443	-1.2167	-1.2482
							240	-1.8737	-1.7655	-1.5899	-1.7394	-1.5776	-1.6033
							239	-2.397	-2.2942	-2.0695	-2.2258	-2.0344	-2.0497
							238	-2.9981	-2.8995	-2.6118	-2.7846	-2.5543	-2.5649
							237	-3.6841	-3.5657	-3.2086	-3.4102	-3.1617	-3.1482
							236	-4.4633	-4.3118	-3.8885	-4.104	-3.8383	-3.8065
							235	-5.3302	-5.1527	-4.6543	-4.8713	-4.6033	-4.5601
							234	-6.2827	-6.0667	-5.4838	-5.7051	-5.4456	-5.4229
							233	-7.3198	-7.0636	-6.3977	-6.6086	-6.324	-6.3495
							232	-8.427	-8.1159	-7.3701	-7.5744	-7.2726	-7.3415
							231	-9.589	-9.2262	-8.3929	-8.5884	-8.2587	-8.3279
							230	-10.762	-10.343	-9.4401	-9.6313	-9.2853	-9.3599
							229	-11.91	-11.442	-10.455	-10.668	-10.274	-10.332
							228	-13.006	-12.486	-11.427	-11.667	-11.189	-11.255
							227	-14.007	-13.453	-12.318	-12.589	-11.998	-12.091
							226	-14.901	-14.318	-13.112	-13.431	-12.728	-12.84
							225	-15.644	-15.027	-13.76	-14.129	-13.347	-13.46
							224	-16.214	-15.568	-14.238	-14.681	-13.821	-13.945
							223	-16.622	-15.946	-14.569	-15.089	-14.18	-14.308
							222	-16.832	-16.18	-14.782	-15.318	-14.406	-14.555
							221	-16.923	-16.309	-14.917	-15.439	-14.529	-14.716
							220	-16.961	-16.373	-14.993	-15.483	-14.547	-14.758
							219	-16.907	-16.351	-15.014	-15.447	-14.507	-14.716
							218	-16.818	-16.282	-14.971	-15.372	-14.46	-14.634
							217	-16.705	-16.193	-14.879	-15.295	-14.418	-14.53
							216	-16.641	-16.134	-14.799	-15.248	-14.407	-14.465
							215	-16.681	-16.175	-14.755	-15.251	-14.439	-14.416
							214	-16.839	-16.309	-14.839	-15.338	-14.575	-14.534
							213	-17.076	-16.503	-15.019	-15.525	-14.811	-14.755
							212	-17.35	-16.735	-15.277	-15.836	-15.086	-15.034
							211	-17.595	-16.917	-15.512	-16.153	-15.332	-15.285
							210	-17.809	-17.07	-15.672	-16.375	-15.478	-15.459
							209	-17.743	-16.983	-15.593	-16.342	-15.416	-15.493
							208	-17.351	-16.76	-15.278	-16.005	-15.085	-15.209
							207	-16.342	-15.987	-14.43	-15.271	-14.466	-14.592
							206	-14.782	-14.576	-13.159	-14.008	-13.461	-13.562
							205	-12.42	-12.496	-11.031	-11.763	-11.955	-11.99
							204	-9.5278	-9.9081	-8.4823	-9.1877	-9.6942	-9.7287
							203	-6.3347	-7.0162	-5.7164	-6.4616	-6.9332	-6.9977
							202	-3.1296	-4.0875	-2.9726	-3.7732	-3.9093	-4.0333
							201	-0.12319	-1.3125	-0.44117	-1.3018	-0.87849	-1.0849
							200	2.5252	1.163	1.6887	0.7635	1.9682	1.6043
							199	4.6864	3.2158	3.3431	2.3037	4.4977	3.9727
							198	6.268	4.7368	4.4692	3.2577	6.6306	5.9177

## Sheet: Fig 3-fig sup1c PRL+1% PRL
								PRL+1% PRL
						Wavelength (nm)	Day 0	Day 2	Day 4	Day 6	Day 8	Day 10
						260	0	0	0	0	0	0
						259	0.023304	0.00793	-0.01122	0.0013845	-0.022989	-0.008936
						258	0.049751	0.01656	-0.024965	-0.007274	-0.053609	-0.033322
						257	0.072863	0.014857	-0.039341	-0.011346	-0.082885	-0.060807
						256	0.092194	0.014248	-0.048572	-0.012455	-0.10008	-0.079326
						255	0.10235	0.0020855	-0.056949	-0.018002	-0.10581	-0.091012
						254	0.092745	-0.016773	-0.058277	-0.027438	-0.10253	-0.091806
						253	0.066561	-0.054998	-0.061137	-0.053129	-0.093319	-0.10503
						252	0.026086	-0.103	-0.062752	-0.08847	-0.091801	-0.13492
						251	-0.009207	-0.13708	-0.089477	-0.12939	-0.10594	-0.17493
						250	-0.050267	-0.1603	-0.13129	-0.17621	-0.14086	-0.23315
						249	-0.087545	-0.17951	-0.20149	-0.23143	-0.19742	-0.30412
						248	-0.11832	-0.19042	-0.24882	-0.27064	-0.23587	-0.35992
						247	-0.17259	-0.22775	-0.29782	-0.31234	-0.28502	-0.41626
						246	-0.23936	-0.27905	-0.37308	-0.38142	-0.3535	-0.48581
						245	-0.33857	-0.36138	-0.47497	-0.47428	-0.45064	-0.57915
						244	-0.46077	-0.48856	-0.60403	-0.60398	-0.58613	-0.71213
						243	-0.63369	-0.66745	-0.76504	-0.77002	-0.75848	-0.86168
						242	-0.86679	-0.88743	-0.96836	-0.97652	-0.95371	-1.0356
						241	-1.1613	-1.1579	-1.23	-1.2534	-1.2107	-1.2621
						240	-1.5296	-1.4964	-1.5468	-1.5933	-1.5196	-1.5467
						239	-1.9765	-1.9201	-1.9404	-2.0285	-1.9109	-1.9253
						238	-2.4824	-2.3857	-2.3882	-2.5107	-2.3474	-2.3643
						237	-3.0492	-2.8863	-2.9292	-3.064	-2.8538	-2.8677
						236	-3.6937	-3.4498	-3.5422	-3.6612	-3.4281	-3.4423
						235	-4.4135	-4.0864	-4.2254	-4.3197	-4.0566	-4.0853
						234	-5.1897	-4.7811	-4.9454	-5.0155	-4.7166	-4.7819
						233	-6.0437	-5.5358	-5.723	-5.7728	-5.4243	-5.5253
						232	-6.9351	-6.3256	-6.5769	-6.5887	-6.1737	-6.3174
						231	-7.8771	-7.1612	-7.4375	-7.4425	-6.9576	-7.1236
						230	-8.8312	-8.0313	-8.3231	-8.3138	-7.7752	-7.9584
						229	-9.8058	-8.8982	-9.2188	-9.1946	-8.6129	-8.8025
						228	-10.736	-9.7347	-10.081	-10.035	-9.4208	-9.6253
						227	-11.57	-10.481	-10.889	-10.822	-10.199	-10.414
						226	-12.293	-11.154	-11.59	-11.545	-10.914	-11.14
						225	-12.898	-11.713	-12.147	-12.161	-11.529	-11.752
						224	-13.388	-12.148	-12.571	-12.637	-12.002	-12.235
						223	-13.757	-12.464	-12.888	-13.007	-12.359	-12.594
						222	-13.991	-12.671	-13.132	-13.26	-12.621	-12.841
						221	-14.138	-12.797	-13.249	-13.385	-12.764	-12.98
						220	-14.216	-12.879	-13.283	-13.398	-12.819	-13.014
						219	-14.247	-12.884	-13.233	-13.369	-12.802	-12.981
						218	-14.224	-12.827	-13.151	-13.323	-12.746	-12.9
						217	-14.189	-12.736	-13.041	-13.298	-12.675	-12.807
						216	-14.196	-12.675	-13.016	-13.277	-12.647	-12.762
						215	-14.281	-12.691	-13.067	-13.319	-12.699	-12.808
						214	-14.402	-12.776	-13.212	-13.458	-12.869	-12.922
						213	-14.568	-12.912	-13.499	-13.731	-13.121	-13.125
						212	-14.744	-13.078	-13.841	-14.035	-13.416	-13.387
						211	-14.866	-13.281	-14.152	-14.309	-13.636	-13.681
						210	-14.981	-13.511	-14.38	-14.445	-13.716	-13.916
						209	-14.924	-13.647	-14.444	-14.42	-13.682	-13.991
						208	-14.594	-13.494	-14.392	-14.17	-13.464	-13.843
						207	-13.885	-12.876	-13.96	-13.398	-12.956	-13.35
						206	-12.681	-11.693	-13.072	-12.217	-12.013	-12.312
						205	-10.756	-10.047	-11.486	-10.492	-10.461	-10.68
						204	-8.2876	-7.8759	-9.1805	-8.2458	-8.3504	-8.4689
						203	-5.5046	-5.377	-6.3979	-5.6858	-5.8886	-5.9045
						202	-2.6547	-2.7947	-3.3942	-2.9875	-3.2927	-3.1874
						201	0.094168	-0.30184	-0.37556	-0.405	-0.76161	-0.51984
						200	2.5827	1.9604	2.434	1.8932	1.5399	1.9437
						199	4.6697	3.8566	4.8714	3.8041	3.5485	4.0443
						198	6.2868	5.3037	6.8838	5.3236	5.1757	5.683

## Sheet: Fig 3-fig sup1c PRL+2% PRL
									PRL+2% PRL
						Wavelength (nm)	Day 0	Day 2	Day 4	Day 6	Day 8	Day 10
						260	0	0	0	0	0	0
						259	0.014913	-0.027879	-0.0062485	0.024431	0.014245	0.0054554
						258	0.025468	-0.060038	-0.013698	0.049121	0.015729	0.0060846
						257	0.022577	-0.09821	-0.023163	0.061978	0.000557	-0.0093961
						256	0.01664	-0.13003	-0.032426	0.078637	-0.018744	-0.025722
						255	-0.002233	-0.1556	-0.043163	0.077415	-0.046017	-0.042958
						254	-0.028134	-0.17328	-0.054102	0.06716	-0.082815	-0.0552
						253	-0.076019	-0.18471	-0.063434	0.039793	-0.1327	-0.072059
						252	-0.13383	-0.19932	-0.07166	0.0010702	-0.18908	-0.089116
						251	-0.17646	-0.23585	-0.076993	-0.029478	-0.22518	-0.091418
						250	-0.21229	-0.2817	-0.076727	-0.057826	-0.24426	-0.08825
						249	-0.23545	-0.35787	-0.078782	-0.083723	-0.25748	-0.083799
						248	-0.24761	-0.41977	-0.092183	-0.096601	-0.26597	-0.079486
						247	-0.28794	-0.48866	-0.12016	-0.12628	-0.28412	-0.095736
						246	-0.3456	-0.5819	-0.18087	-0.16583	-0.31497	-0.11716
						245	-0.4366	-0.68822	-0.27944	-0.2346	-0.36377	-0.17558
						244	-0.567	-0.82295	-0.42135	-0.3325	-0.45238	-0.27189
						243	-0.74791	-0.99279	-0.59622	-0.48193	-0.58919	-0.43223
						242	-0.98445	-1.1887	-0.79977	-0.65721	-0.77213	-0.63273
						241	-1.2923	-1.4395	-1.0451	-0.87322	-0.99714	-0.86896
						240	-1.6809	-1.7296	-1.3361	-1.1487	-1.2882	-1.163
						239	-2.155	-2.094	-1.6781	-1.4865	-1.6373	-1.5182
						238	-2.6782	-2.5433	-2.087	-1.8702	-2.0262	-1.9205
						237	-3.2622	-3.0708	-2.566	-2.3012	-2.4506	-2.359
						236	-3.9163	-3.6805	-3.105	-2.7835	-2.9293	-2.861
						235	-4.6446	-4.3764	-3.6847	-3.3246	-3.4735	-3.4273
						234	-5.4406	-5.1085	-4.3061	-3.9029	-4.0713	-4.0373
						233	-6.2938	-5.8889	-4.9616	-4.5336	-4.7324	-4.6928
						232	-7.169	-6.7047	-5.6504	-5.2003	-5.413	-5.3577
						231	-8.072	-7.5488	-6.3479	-5.9121	-6.1172	-6.0774
						230	-8.9923	-8.4225	-7.0403	-6.64	-6.836	-6.8243
						229	-9.9223	-9.2991	-7.7063	-7.3641	-7.5735	-7.5838
						228	-10.84	-10.142	-8.3353	-8.0401	-8.3008	-8.306
						227	-11.698	-10.93	-8.9069	-8.6364	-8.9698	-8.9538
						226	-12.47	-11.636	-9.408	-9.1706	-9.5643	-9.5336
						225	-13.124	-12.223	-9.8709	-9.6206	-10.049	-10.001
						224	-13.651	-12.691	-10.271	-9.9813	-10.431	-10.379
						223	-14.053	-13.027	-10.594	-10.284	-10.7	-10.631
						222	-14.305	-13.267	-10.842	-10.482	-10.847	-10.775
						221	-14.447	-13.385	-11.025	-10.618	-10.92	-10.853
						220	-14.512	-13.419	-11.18	-10.703	-10.963	-10.885
						219	-14.495	-13.393	-11.323	-10.717	-10.968	-10.855
						218	-14.392	-13.323	-11.459	-10.702	-10.923	-10.775
						217	-14.271	-13.288	-11.582	-10.65	-10.832	-10.706
						216	-14.211	-13.292	-11.729	-10.611	-10.779	-10.674
						215	-14.223	-13.378	-11.933	-10.585	-10.797	-10.699
						214	-14.318	-13.572	-12.08	-10.62	-10.871	-10.784
						213	-14.467	-13.879	-12.197	-10.656	-10.974	-10.873
						212	-14.681	-14.28	-12.244	-10.761	-11.079	-11.035
						211	-14.872	-14.589	-12.177	-10.867	-11.172	-11.168
						210	-15.049	-14.772	-11.953	-10.976	-11.282	-11.322
						209	-15.053	-14.733	-11.458	-10.981	-11.239	-11.308
						208	-14.742	-14.502	-10.723	-10.785	-11.015	-11.055
						207	-13.988	-13.913	-9.766	-10.337	-10.468	-10.52
						206	-12.962	-12.95	-8.6262	-9.5912	-9.5352	-9.6456
						205	-11.312	-11.137	-7.3305	-8.3695	-8.0734	-8.2047
						204	-9.0796	-8.7363	-5.9157	-6.6226	-6.2111	-6.217
						203	-6.5053	-5.9928	-4.412	-4.5024	-4.0983	-3.8929
						202	-3.8207	-3.0977	-2.8619	-2.2301	-1.956	-1.431
						201	-1.1721	-0.29784	-1.3151	0.057606	0.11055	1.0119
						200	1.246	2.2287	0.22369	2.1804	1.9731	3.2796
						199	3.3125	4.3552	1.7031	4.0647	3.5333	5.2613
						198	4.9156	6.0169	3.073	5.5621	4.7144	6.7983

## Sheet: Fig 3-fig sup1c PRL+5% PRL
									PRL+5% PRL
						Wavelength (nm)	Day 0	Day 2	Day 4	Day 6	Day 8	Day 10
						260	0	0	0	0	0	0
						259	0.023724	-0.008495	0.030924	0.011316	0.016869	0.024081
						258	0.046344	-0.023527	0.047718	0.025882	0.031126	0.042225
						257	0.0638	-0.045156	0.049539	0.02402	0.039104	0.044944
						256	0.074318	-0.053801	0.04797	0.024554	0.036778	0.034493
						255	0.071885	-0.066466	0.031505	0.01331	0.024663	0.012203
						254	0.04803	-0.069343	0.0059725	-0.00545	0.0092905	-0.012439
						253	0.0005122	-0.082244	-0.030045	-0.035257	-0.0205	-0.049556
						252	-0.058775	-0.10074	-0.077456	-0.077978	-0.052747	-0.093102
						251	-0.10647	-0.12882	-0.11971	-0.11789	-0.067419	-0.11443
						250	-0.14962	-0.16764	-0.15478	-0.15333	-0.074394	-0.13578
						249	-0.1879	-0.23107	-0.18272	-0.18521	-0.084113	-0.16299
						248	-0.22133	-0.28804	-0.19925	-0.20874	-0.10868	-0.16859
						247	-0.26716	-0.3433	-0.23146	-0.24342	-0.14488	-0.19405
						246	-0.3313	-0.42591	-0.28502	-0.28525	-0.18607	-0.2073
						245	-0.42491	-0.53454	-0.35806	-0.35315	-0.24324	-0.251
						244	-0.56813	-0.68253	-0.4718	-0.45276	-0.34751	-0.35018
						243	-0.76395	-0.86853	-0.6079	-0.60271	-0.50736	-0.51055
						242	-1.0093	-1.0806	-0.77195	-0.78224	-0.70967	-0.70907
						241	-1.3116	-1.3443	-0.98276	-1.0055	-0.95466	-0.95168
						240	-1.6935	-1.6549	-1.2454	-1.2885	-1.2428	-1.2391
						239	-2.147	-2.0491	-1.5693	-1.6278	-1.5881	-1.5921
						238	-2.6662	-2.505	-1.9416	-2.0176	-1.9688	-1.9877
						237	-3.2505	-3.0377	-2.3562	-2.4463	-2.3737	-2.4094
						236	-3.9069	-3.6495	-2.8348	-2.9348	-2.8432	-2.8826
						235	-4.65	-4.3404	-3.3668	-3.4738	-3.382	-3.4219
						234	-5.4572	-5.0884	-3.9585	-4.0487	-3.9698	-3.9973
						233	-6.3108	-5.891	-4.6063	-4.6685	-4.6036	-4.6281
						232	-7.2066	-6.7303	-5.2911	-5.3192	-5.2789	-5.2785
						231	-8.1519	-7.5801	-6.0198	-6.027	-6.0071	-5.9953
						230	-9.1345	-8.4648	-6.7748	-6.7684	-6.7768	-6.7631
						229	-10.116	-9.3556	-7.53	-7.5008	-7.5365	-7.5276
						228	-11.038	-10.218	-8.2511	-8.1984	-8.2566	-8.256
						227	-11.875	-11.016	-8.9066	-8.8209	-8.9009	-8.9193
						226	-12.603	-11.732	-9.4805	-9.3646	-9.4661	-9.5013
						225	-13.225	-12.322	-9.9629	-9.7993	-9.943	-9.9799
						224	-13.731	-12.775	-10.331	-10.152	-10.317	-10.349
						223	-14.098	-13.122	-10.581	-10.41	-10.576	-10.591
						222	-14.322	-13.381	-10.728	-10.563	-10.735	-10.736
						221	-14.45	-13.519	-10.796	-10.645	-10.804	-10.81
						220	-14.51	-13.566	-10.842	-10.704	-10.842	-10.829
						219	-14.482	-13.518	-10.842	-10.721	-10.838	-10.801
						218	-14.423	-13.435	-10.827	-10.692	-10.826	-10.749
						217	-14.327	-13.326	-10.793	-10.637	-10.788	-10.699
						216	-14.289	-13.268	-10.81	-10.602	-10.792	-10.699
						215	-14.32	-13.301	-10.857	-10.599	-10.798	-10.73
						214	-14.453	-13.452	-10.933	-10.637	-10.862	-10.852
						213	-14.612	-13.717	-10.993	-10.694	-10.939	-10.999
						212	-14.82	-14.035	-11.118	-10.812	-11.097	-11.221
						211	-14.98	-14.318	-11.239	-10.94	-11.265	-11.42
						210	-15.155	-14.517	-11.408	-11.112	-11.433	-11.649
						209	-15.056	-14.596	-11.408	-11.087	-11.455	-11.659
						208	-14.8	-14.48	-11.176	-10.877	-11.205	-11.466
						207	-14.071	-13.97	-10.647	-10.351	-10.713	-11.006
						206	-13.077	-12.876	-9.8222	-9.6307	-9.9495	-10.189
						205	-11.08	-11.034	-8.4942	-8.3865	-8.4141	-8.7628
						204	-8.446	-8.7114	-6.689	-6.5459	-6.354	-6.8098
						203	-5.3921	-6.0698	-4.5591	-4.2964	-3.9296	-4.5053
						202	-2.2281	-3.3461	-2.3289	-1.8777	-1.3856	-2.0747
						201	0.86131	-0.75662	-0.098546	0.56248	1.162	0.34059
						200	3.672	1.54	1.9652	2.8611	3.5018	2.5475
						199	6.1159	3.4374	3.7609	4.8786	5.5226	4.4643
						198	8.0198	4.8902	5.121	6.4898	7.0776	5.9461

## Sheet: Fig 3-fig sup1d 5% GAL
									5% GAL
							Wavelength (nm)	Day 0	Day 2	Day 4	Day 6	Day 8	Day 10
							260	0	0	0	0	0	0
							259	0.034808	0.030996	0.022401	0.054632	-0.041662	-0.05613
							258	0.14694	0.096673	0.086966	0.14707	-0.07315	-0.087089
							257	0.23275	0.14113	0.1276	0.2104	-0.11284	-0.14112
							256	0.30393	0.17106	0.14159	0.29748	-0.14256	-0.18901
							255	0.30866	0.16529	0.097857	0.37972	-0.20588	-0.24489
							254	0.32056	0.19161	0.064418	0.48315	-0.22103	-0.27452
							253	0.37609	0.2418	0.05187	0.65715	-0.23655	-0.25508
							252	0.41889	0.30645	0.047357	0.8143	-0.2384	-0.20216
							251	0.44618	0.37666	0.025028	0.92273	-0.27581	-0.15348
							250	0.4778	0.48748	0.011698	0.98253	-0.30595	-0.093926
							249	0.50628	0.60787	-0.019953	0.99561	-0.31464	-0.069527
							248	0.55256	0.70022	-0.012594	0.99333	-0.31264	-0.042974
							247	0.54886	0.70091	-0.022814	0.91659	-0.34309	-0.059191
							246	0.44806	0.62787	-0.08312	0.76215	-0.44245	-0.14328
							245	0.21877	0.45136	-0.26844	0.5158	-0.64438	-0.35982
							244	-0.085548	0.19444	-0.5079	0.22395	-0.90239	-0.5683
							243	-0.46035	-0.16758	-0.83697	-0.10623	-1.1783	-0.89534
							242	-0.78704	-0.45854	-1.1596	-0.37684	-1.4394	-1.1927
							241	-1.0292	-0.74696	-1.4656	-0.63613	-1.6687	-1.5321
							240	-1.3385	-1.0678	-1.8268	-0.92822	-1.9623	-1.8753
							239	-1.6886	-1.4607	-2.2317	-1.3114	-2.3366	-2.2357
							238	-2.2528	-2.0163	-2.8027	-1.8634	-2.9127	-2.7565
							237	-2.974	-2.7061	-3.4953	-2.5507	-3.639	-3.4676
							236	-3.6813	-3.4626	-4.1704	-3.2032	-4.3511	-4.278
							235	-4.3747	-4.1891	-4.8456	-3.8809	-5.0518	-5.0884
							234	-5.0654	-4.9744	-5.5302	-4.5167	-5.7645	-5.918
							233	-5.9372	-5.8508	-6.3326	-5.2579	-6.5576	-6.745
							232	-6.9362	-6.7556	-7.2257	-6.0877	-7.423	-7.6409
							231	-7.9908	-7.7515	-8.24	-6.9896	-8.3691	-8.5932
							230	-8.986	-8.7	-9.2253	-7.991	-9.3733	-9.5524
							229	-10.055	-9.7265	-10.187	-9.0404	-10.452	-10.57
							228	-11.077	-10.707	-11.099	-10.198	-11.468	-11.568
							227	-12.016	-11.655	-11.971	-11.324	-12.427	-12.536
							226	-12.862	-12.475	-12.808	-12.354	-13.259	-13.405
							225	-13.642	-13.257	-13.609	-13.269	-14	-14.233
							224	-14.392	-14.041	-14.313	-14.084	-14.671	-14.929
							223	-14.979	-14.716	-14.87	-14.748	-15.17	-15.45
							222	-15.445	-15.26	-15.299	-15.305	-15.555	-15.887
							221	-15.57	-15.496	-15.403	-15.539	-15.546	-16.047
							220	-15.318	-15.389	-15.13	-15.447	-15.24	-15.783
							219	-14.565	-14.787	-14.455	-14.793	-14.434	-15.13
							218	-13.307	-13.577	-13.267	-13.573	-13.18	-13.937
							217	-11.505	-11.91	-11.494	-11.75	-11.43	-12.226
							216	-9.4563	-9.9573	-9.2308	-9.5217	-9.2815	-9.982
							215	-6.9175	-7.6685	-6.6382	-6.8807	-6.8097	-7.4936
							214	-3.8465	-4.9095	-3.6403	-3.7081	-3.8811	-4.6828
							213	-0.30517	-1.7944	-0.24637	-0.020273	-0.53714	-1.6516
							212	3.3518	1.3782	3.3838	4.0599	3.1092	1.6277
							211	6.9053	5.0434	6.9471	8.0784	6.7223	5.0613
							210	10.156	8.6382	10.363	11.814	10.286	8.4738
							209	13.008	11.95	13.322	14.971	13.352	11.582
							208	15.5	14.934	15.817	17.574	15.922	14.245
							207	17.647	17.511	17.834	19.65	17.975	16.52
							206	19.372	19.721	19.428	21.138	19.497	18.37
							205	20.622	21.465	20.539	22.123	20.56	19.777
							204	21.525	22.836	21.144	22.597	21.173	20.811
							203	21.953	23.746	21.206	22.606	21.282	21.413
							202	21.927	24.243	20.761	22.131	20.91	21.597
							201	21.487	24.274	19.914	21.192	20.097	21.364
							200	20.718	23.911	18.767	19.849	18.936	20.82
							199	19.796	23.294	17.449	18.237	17.555	20.02
							198	18.673	22.447	15.989	16.389	15.969	18.972

## Sheet: Fig 3-fig sup1d GAL
								GAL
						Wavelength (nm)	Day 0	Day 2	Day 4	Day 6	Day 8	Day 10
						260	0	0	0	0	0	0
						259	-0.081635	-0.041312	-0.029547	-0.048828	-0.077066	-0.058418
						258	-0.18529	-0.077056	-0.057712	-0.092427	-0.064139	-0.09314
						257	-0.28257	-0.032464	-0.023513	-0.13049	-0.062284	-0.051299
						256	-0.32859	0.0051149	0.023283	-0.2171	-0.031918	-0.03016
						255	-0.44159	-0.0050183	0.069088	-0.31991	-0.072557	0.082627
						254	-0.64586	-0.08677	0.047269	-0.45538	-0.11536	0.20812
						253	-0.9842	-0.2433	0.0097169	-0.61963	-0.21148	0.29489
						252	-1.3795	-0.41193	-0.090253	-0.86773	-0.3539	0.22383
						251	-1.5901	-0.51299	-0.0093307	-0.92827	-0.43263	0.22518
						250	-1.633	-0.60629	0.025201	-0.93908	-0.44201	0.20354
						249	-1.7239	-0.78537	-0.034259	-0.99698	-0.51472	0.082621
						248	-1.8398	-0.99208	-0.10624	-1.0602	-0.57567	-0.082714
						247	-1.9417	-1.1646	-0.22679	-1.1795	-0.61108	-0.30054
						246	-2.0219	-1.3027	-0.45128	-1.2327	-0.72917	-0.57734
						245	-1.9541	-1.301	-0.51298	-1.149	-0.71128	-0.76918
						244	-1.8546	-1.2524	-0.61743	-0.97611	-0.6282	-0.83825
						243	-1.637	-1.233	-0.64536	-0.87763	-0.60233	-0.81123
						242	-1.3615	-1.271	-0.70033	-0.89979	-0.60245	-0.69927
						241	-1.1743	-1.3806	-0.76476	-0.98123	-0.65058	-0.47555
						240	-1.1548	-1.5299	-0.94996	-1.1263	-0.72825	-0.35139
						239	-1.2594	-1.6517	-1.0762	-1.2923	-0.7496	-0.36696
						238	-1.4844	-1.7247	-1.2361	-1.5034	-0.80702	-0.55596
						237	-1.5743	-1.6501	-1.1217	-1.5482	-0.75256	-0.65723
						236	-1.6013	-1.4292	-0.91739	-1.4403	-0.56542	-0.66885
						235	-1.6964	-1.2762	-0.74632	-1.3369	-0.4466	-0.73699
						234	-1.6737	-1.0744	-0.5885	-1.2662	-0.26437	-0.82874
						233	-1.6773	-0.96031	-0.58161	-1.2368	-0.16861	-1.0244
						232	-1.4125	-0.64504	-0.35481	-1.0426	-0.014116	-1.0931
						231	-1.2796	-0.34354	-0.07685	-0.76633	0.06001	-1.0351
						230	-1.1776	-0.20789	0.055584	-0.65136	-0.077872	-0.7843
						229	-1.0963	-0.26468	0.11847	-0.69796	-0.29294	-0.59256
						228	-1.1188	-0.36395	-0.047959	-0.95205	-0.56426	-0.49812
						227	-1.1348	-0.51318	-0.25444	-1.2255	-0.77543	-0.43193
						226	-1.3538	-0.7025	-0.59542	-1.5551	-1.0061	-0.51328
						225	-1.5657	-1.0965	-0.90277	-1.8679	-1.1814	-0.69536
						224	-1.8829	-1.5276	-1.2921	-2.1234	-1.4034	-1.0067
						223	-2.0095	-1.8474	-1.4733	-2.1898	-1.3798	-1.2353
						222	-2.0976	-2.0242	-1.6257	-2.0294	-1.3395	-1.2704
						221	-2.0668	-2.138	-1.6795	-1.6995	-1.221	-1.1914
						220	-1.7828	-2.0231	-1.5322	-1.3363	-0.97953	-1.0409
						219	-1.5418	-2.0177	-1.3158	-1.0463	-0.63318	-0.86922
						218	-1.371	-2.0457	-1.0272	-1.0667	-0.44526	-0.87325
						217	-1.6521	-2.156	-0.82433	-1.2965	-0.50348	-0.82213
						216	-1.8178	-2.0793	-0.63765	-1.5579	-0.66883	-0.67736
						215	-1.9441	-1.7723	-0.38856	-1.7004	-0.66438	-0.53876
						214	-2.1095	-1.668	-0.5212	-2.1999	-0.89605	-0.56269
						213	-2.3783	-1.7904	-0.76763	-2.7004	-1.1868	-0.62125
						212	-2.7154	-2.2606	-1.3575	-3.3639	-1.6153	-1.0019
						211	-2.695	-2.7765	-1.8585	-3.6767	-1.8633	-1.3309
						210	-2.5513	-3.1506	-2.4177	-3.9519	-2.0364	-1.8558
						209	-2.5424	-3.6371	-2.9165	-4.2894	-2.428	-2.3361
						208	-2.6248	-3.9835	-3.3414	-4.5585	-3.0085	-2.8297
						207	-2.528	-4.2467	-3.4433	-4.5565	-3.2726	-3.0833
						206	-2.4469	-4.0367	-3.2869	-4.1742	-3.0806	-3.2106
						205	-2.0664	-3.6593	-2.8743	-4.0909	-2.7277	-3.1804
						204	-2.83	-3.9543	-2.8094	-4.7208	-2.8927	-4.1076
						203	-4.3883	-4.5008	-2.8334	-5.6571	-3.257	-5.4033
						202	-6.3704	-5.258	-3.0377	-6.7671	-3.7994	-7.1005
						201	-8.7903	-6.3056	-3.4243	-8.1161	-4.4481	-9.0441
						200	-11.569	-7.9229	-4.2803	-9.8605	-5.4453	-11.321
						199	-14.526	-9.7476	-5.2796	-11.563	-6.4422	-13.707
						198	-17.242	-11.612	-6.405	-13.203	-7.4242	-16.103

## Sheet: Fig 3-fig sup1d GAL+1% GAL
									GAL+1% GAL
							Wavelength (nm)	Day 0	Day 2	Day 4	Day 6	Day 8	Day 10
							260	0	0	0	0	0	0
							259	-0.16901	-0.063323	-0.12397	-0.025431	-0.17704	-0.10863
							258	-0.28615	-0.14878	-0.26666	-0.012008	-0.30508	-0.17157
							257	-0.32587	-0.16731	-0.34029	0.07322	-0.38601	-0.17971
							256	-0.35075	-0.17001	-0.45057	0.14213	-0.3774	-0.17211
							255	-0.33652	-0.046117	-0.59068	0.18685	-0.35136	-0.18908
							254	-0.30221	0.023004	-0.80322	0.20203	-0.39697	-0.252
							253	-0.27887	-0.0080753	-1.0977	0.11046	-0.50477	-0.33781
							252	-0.30447	-0.06613	-1.4226	-0.048625	-0.59984	-0.41629
							251	-0.18667	-0.018928	-1.572	-0.10874	-0.49797	-0.45133
							250	-0.11478	0.057026	-1.6873	-0.09013	-0.36392	-0.45166
							249	-0.2332	-0.069923	-1.8317	-0.16076	-0.46715	-0.52838
							248	-0.44655	-0.30614	-1.9922	-0.27456	-0.73526	-0.64214
							247	-0.82022	-0.5978	-2.1414	-0.5128	-1.1682	-0.74984
							246	-1.1377	-0.90315	-2.2795	-0.78782	-1.5885	-0.87033
							245	-1.2987	-1.0469	-2.2663	-0.89559	-1.8505	-0.87532
							244	-1.3828	-1.1284	-2.2262	-0.82159	-2.0074	-0.82159
							243	-1.3655	-1.1524	-2.1037	-0.68488	-2.0497	-0.78389
							242	-1.2693	-1.1433	-2.0135	-0.58479	-2.0174	-0.82738
							241	-1.0982	-1.0445	-1.9013	-0.5295	-1.9717	-0.90654
							240	-0.94261	-1.0788	-1.9332	-0.58068	-2.056	-1.0904
							239	-0.84793	-1.109	-1.9711	-0.67314	-2.0931	-1.2367
							238	-0.81664	-1.1304	-2.0458	-0.79264	-2.0235	-1.3501
							237	-0.6247	-1.1545	-1.9535	-0.69394	-1.7833	-1.3356
							236	-0.43636	-1.0354	-1.7037	-0.45864	-1.4474	-1.1309
							235	-0.34878	-1.1054	-1.4165	-0.35277	-1.326	-0.93577
							234	-0.36341	-1.0795	-1.176	-0.2817	-1.286	-0.72296
							233	-0.66362	-1.17	-1.13	-0.46737	-1.4147	-0.5489
							232	-0.84924	-1.0586	-0.9952	-0.48982	-1.2963	-0.20364
							231	-1.0144	-0.8887	-0.98369	-0.46846	-1.2064	0.1228
							230	-1.1361	-0.76942	-1.0755	-0.50284	-1.0875	0.34901
							229	-1.2185	-0.72304	-1.2307	-0.71244	-1.0286	0.41012
							228	-1.3212	-0.73745	-1.4187	-1.0107	-1.1247	0.22723
							227	-1.4315	-0.71826	-1.4567	-1.2212	-1.1628	-0.051212
							226	-1.6552	-0.77514	-1.6164	-1.4491	-1.3941	-0.46497
							225	-1.9614	-0.84393	-1.7706	-1.6196	-1.5091	-0.92006
							224	-2.2698	-0.99556	-2.06	-1.853	-1.6347	-1.3506
							223	-2.4358	-1.08	-2.1795	-1.8963	-1.6885	-1.698
							222	-2.3544	-1.0226	-2.2414	-1.8802	-1.6233	-1.8234
							221	-2.182	-1.0682	-2.2372	-1.7825	-1.6352	-1.8373
							220	-1.8544	-0.93661	-2.0977	-1.5015	-1.5026	-1.6239
							219	-1.658	-1.0276	-2.0429	-1.2718	-1.3822	-1.2708
							218	-1.5954	-1.2963	-2.0189	-1.1626	-1.3378	-0.77274
							217	-1.6973	-1.7384	-2.1561	-1.2069	-1.4779	-0.40021
							216	-1.5478	-2.0037	-2.1548	-1.1432	-1.5661	-0.022404
							215	-1.2946	-1.9028	-1.9406	-0.93573	-1.5145	0.35194
							214	-1.3722	-1.7888	-1.8393	-1.0138	-1.5349	0.43406
							213	-1.7803	-1.6756	-1.832	-1.1295	-1.6136	0.38487
							212	-2.5861	-1.7902	-2.0811	-1.5343	-1.9183	0.11974
							211	-3.4128	-1.9566	-2.3987	-1.7965	-1.9985	-0.22676
							210	-4.0337	-2.112	-2.847	-2.111	-2.1583	-0.67097
							209	-4.6206	-2.3469	-3.7547	-2.4345	-2.3046	-1.4981
							208	-4.7515	-2.7248	-4.5811	-2.5228	-2.367	-2.2856
							207	-4.6319	-2.9771	-5.2763	-2.5997	-2.4087	-2.9652
							206	-4.1082	-3.1686	-5.3885	-2.5187	-2.3762	-3.3748
							205	-3.3153	-3.3194	-5.2426	-2.7837	-2.1046	-3.2149
							204	-3.3899	-3.8697	-5.8004	-3.3382	-2.3976	-3.4856
							203	-3.927	-4.3999	-6.7503	-3.8181	-2.9152	-4.0425
							202	-4.7384	-4.785	-7.9785	-4.211	-3.5946	-4.7562
							201	-6.0141	-5.0461	-9.4169	-4.7068	-4.3151	-5.5896
							200	-7.9711	-5.5544	-11.3	-5.5936	-5.3563	-6.6894
							199	-10.277	-6.2137	-13.311	-6.4197	-6.5793	-7.8376
							198	-12.675	-6.9925	-15.245	-7.1728	-7.7895	-9.0026

## Sheet: Fig3-fig sup1d GAL+2% GAL
									GAL+2% GAL
						Wavelength (nm)	Day 0	Day 2	Day 4	Day 6	Day 8	Day 10
						260	0	0	0	0	0	0
						259	-0.00081585	0.050336	-0.005973	-0.036334	0.062061	0.040009
						258	-0.016131	0.16037	0.011895	-0.046683	0.1801	0.095046
						257	-0.0021145	0.27215	-0.0019297	-0.092025	0.25532	0.12241
						256	-0.012401	0.37435	-0.021475	-0.13292	0.33633	0.14547
						255	-0.070739	0.40939	-0.083843	-0.19201	0.31905	0.12784
						254	-0.181	0.46533	-0.1285	-0.22353	0.31004	0.11796
						253	-0.38236	0.51766	-0.16856	-0.22556	0.34548	0.1476
						252	-0.69167	0.57751	-0.16817	-0.19082	0.38763	0.14982
						251	-0.76286	0.61944	-0.18205	-0.17685	0.39785	0.08863
						250	-0.71711	0.69604	-0.15107	-0.16146	0.36992	0.044738
						249	-0.79502	0.77372	-0.13888	-0.16667	0.31543	0.011963
						248	-0.93021	0.86333	-0.12603	-0.15402	0.26858	-0.010109
						247	-1.0761	0.92891	-0.12934	-0.11873	0.20082	-0.068095
						246	-1.2262	0.95828	-0.16989	-0.13815	0.035411	-0.21493
						245	-1.2587	0.88518	-0.26377	-0.25513	-0.25332	-0.42205
						244	-1.3064	0.74415	-0.35998	-0.44684	-0.62813	-0.73142
						243	-1.2681	0.56082	-0.5545	-0.67609	-1.006	-1.0834
						242	-1.1973	0.45084	-0.70777	-0.82814	-1.3111	-1.3758
						241	-1.1226	0.34615	-0.84393	-0.92711	-1.5369	-1.6373
						240	-1.1305	0.2375	-0.9871	-1.1139	-1.784	-1.9381
						239	-1.2339	0.1147	-1.1031	-1.3892	-2.0993	-2.3178
						238	-1.4221	-0.10811	-1.3015	-1.8293	-2.5068	-2.8493
						237	-1.3989	-0.44081	-1.5735	-2.388	-3.0255	-3.5216
						236	-1.3142	-0.76868	-1.8857	-2.9312	-3.6103	-4.2613
						235	-1.1977	-1.0233	-2.2345	-3.4586	-4.2061	-4.9663
						234	-1.1062	-1.2447	-2.5781	-4.0115	-4.8677	-5.6897
						233	-1.1733	-1.5269	-2.9547	-4.6542	-5.6542	-6.4696
						232	-1.1098	-1.9127	-3.4314	-5.3238	-6.5665	-7.2933
						231	-1.0394	-2.3882	-3.9652	-6.1118	-7.6157	-8.2073
						230	-0.99603	-2.8564	-4.5423	-6.8367	-8.6433	-9.1613
						229	-0.90584	-3.3818	-5.1354	-7.6727	-9.7214	-10.217
						228	-0.99066	-3.8404	-5.7003	-8.4799	-10.808	-11.264
						227	-1.0877	-4.2657	-6.2407	-9.3207	-11.888	-12.261
						226	-1.2976	-4.6522	-6.7411	-10.103	-12.942	-13.108
						225	-1.488	-5.0148	-7.3136	-10.865	-13.906	-13.937
						224	-1.8177	-5.3926	-7.8648	-11.458	-14.771	-14.657
						223	-2.0672	-5.6457	-8.2852	-11.9	-15.42	-15.211
						222	-2.2988	-5.849	-8.6486	-12.241	-15.896	-15.666
						221	-2.3561	-5.8344	-8.802	-12.434	-16.02	-15.789
						220	-2.443	-5.7418	-8.8033	-12.429	-15.804	-15.578
						219	-2.5562	-5.4196	-8.5326	-12.01	-15.111	-14.843
						218	-2.6791	-4.8693	-7.9126	-11.07	-13.915	-13.542
						217	-2.8943	-4.0781	-6.9387	-9.7257	-12.254	-11.747
						216	-3.0023	-3.2054	-5.8179	-8.0206	-10.239	-9.5223
						215	-2.8703	-2.3	-4.4605	-6.0972	-7.8878	-6.9628
						214	-2.8446	-1.1874	-2.8305	-3.7504	-4.9723	-3.8383
						213	-2.6893	0.0055311	-1.0131	-1.0824	-1.6351	-0.54853
						212	-2.7412	1.2056	1.0204	1.8051	1.764	2.9288
						211	-2.7273	2.5863	3.0985	4.7178	5.3004	6.4376
						210	-3.108	4.0398	4.999	7.5954	8.7269	9.8154
						209	-3.6037	5.2173	6.6497	10.202	11.909	12.817
						208	-4.0227	6.1147	7.9938	12.518	14.747	15.403
						207	-4.148	6.7875	9.1189	14.496	17.269	17.534
						206	-3.9928	7.2456	9.9694	16.195	19.427	19.208
						205	-3.7134	7.5029	10.606	17.459	21.188	20.43
						204	-4.3103	7.6022	10.991	18.436	22.577	21.287
						203	-5.4168	7.4666	11.11	19.009	23.522	21.667
						202	-6.8268	7.1253	10.922	19.237	24.037	21.606
						201	-8.4245	6.645	10.474	19.127	24.196	21.112
						200	-10.395	6.0372	9.8739	18.785	24.046	20.355
						199	-12.524	5.4425	9.1837	18.178	23.708	19.367
						198	-14.783	4.7596	8.3511	17.354	23.137	18.174

[truncated: 1 more sheets: Fig 3-fig sup1d GAL+5% GAL]
