# Supplementary material for: Co-aggregation and secondary nucleation in the life cycle of human prolactin/galanin functional amyloids
Source: eLife. 2022 Mar 8;11:e73835. doi: 10.7554/eLife.73835 (PMC8993219; doi:10.7554/eLife.73835)
Supplement: Figure 3—figure supplement 2—source data 1. [file elife-73835-fig3-figsupp2-data1.xlsx]

## Sheet: Fig 3-fig sup2a PRL
								PRL
						Wavelength (nm)	Day 0	Day 2	Day 4	Day 6	Day 8	Day 10
						260	0	0	0	0	0	0
						259	0.0087045	0.0074589	0.019522	4.2484e-05	0.034859	-0.01884
						258	0.0093105	0.014961	0.029109	-0.0025158	0.062591	-0.03583
						257	0.018922	0.027188	0.036684	-0.016283	0.090552	-0.059203
						256	0.031582	0.031615	0.04764	-0.035722	0.107	-0.083306
						255	0.056678	0.035186	0.056635	-0.059205	0.11716	-0.10804
						254	0.091461	0.03543	0.073816	-0.085285	0.12689	-0.12804
						253	0.12254	0.028649	0.081371	-0.10919	0.11992	-0.13761
						252	0.13769	0.026908	0.077089	-0.1279	0.10764	-0.1515
						251	0.12688	0.021959	0.049483	-0.13836	0.080531	-0.16888
						250	0.089505	0.011898	-0.01515	-0.14787	0.030649	-0.17531
						249	0.029662	-0.020539	-0.082332	-0.16683	-0.022765	-0.19198
						248	-0.034082	-0.075487	-0.14222	-0.20975	-0.073022	-0.23933
						247	-0.11619	-0.1724	-0.20309	-0.28764	-0.13138	-0.33419
						246	-0.2146	-0.30989	-0.28447	-0.4191	-0.20711	-0.47023
						245	-0.32981	-0.48841	-0.39208	-0.57667	-0.29949	-0.64369
						244	-0.49743	-0.69881	-0.54558	-0.76772	-0.43773	-0.84891
						243	-0.69974	-0.94327	-0.74286	-1.0037	-0.62357	-1.0897
						242	-0.9598	-1.2247	-0.98754	-1.2827	-0.88446	-1.3582
						241	-1.2553	-1.5659	-1.2741	-1.6401	-1.1925	-1.6704
						240	-1.6211	-2.0045	-1.6317	-2.0855	-1.5815	-2.0413
						239	-2.0861	-2.5124	-2.1059	-2.6021	-2.068	-2.5065
						238	-2.653	-3.1071	-2.6789	-3.2057	-2.6272	-3.0458
						237	-3.3031	-3.8032	-3.3418	-3.8905	-3.2734	-3.6789
						236	-4.0426	-4.5962	-4.091	-4.6844	-3.9998	-4.4092
						235	-4.8372	-5.4869	-4.8801	-5.5731	-4.7964	-5.2735
						234	-5.6946	-6.4628	-5.7364	-6.5627	-5.6627	-6.2424
						233	-6.6139	-7.504	-6.6478	-7.6211	-6.5836	-7.2948
						232	-7.5918	-8.5737	-7.6342	-8.718	-7.579	-8.3867
						231	-8.6032	-9.6747	-8.6572	-9.8226	-8.5988	-9.4921
						230	-9.6454	-10.758	-9.7071	-10.906	-9.65	-10.576
						229	-10.684	-11.797	-10.747	-11.91	-10.708	-11.585
						228	-11.686	-12.737	-11.724	-12.825	-11.724	-12.489
						227	-12.613	-13.55	-12.616	-13.626	-12.655	-13.263
						226	-13.429	-14.224	-13.431	-14.295	-13.493	-13.905
						225	-14.122	-14.761	-14.121	-14.828	-14.188	-14.433
						224	-14.689	-15.148	-14.672	-15.204	-14.737	-14.794
						223	-15.117	-15.377	-15.061	-15.424	-15.138	-15.037
						222	-15.39	-15.481	-15.312	-15.501	-15.395	-15.155
						221	-15.527	-15.489	-15.443	-15.47	-15.535	-15.179
						220	-15.57	-15.381	-15.503	-15.366	-15.591	-15.093
						219	-15.581	-15.21	-15.483	-15.218	-15.577	-14.943
						218	-15.572	-14.982	-15.442	-15.036	-15.562	-14.759
						217	-15.586	-14.781	-15.349	-14.881	-15.513	-14.555
						216	-15.646	-14.651	-15.315	-14.768	-15.511	-14.413
						215	-15.779	-14.66	-15.377	-14.761	-15.58	-14.329
						214	-15.99	-14.767	-15.556	-14.846	-15.769	-14.345
						213	-16.304	-14.98	-15.862	-15.016	-16.027	-14.434
						212	-16.588	-15.195	-16.195	-15.222	-16.31	-14.61
						211	-16.862	-15.397	-16.497	-15.399	-16.569	-14.795
						210	-17.016	-15.459	-16.716	-15.395	-16.802	-14.874
						209	-16.965	-15.367	-16.679	-15.209	-16.781	-14.718
						208	-16.595	-14.957	-16.353	-14.685	-16.539	-14.315
						207	-15.873	-14.089	-15.735	-13.827	-15.84	-13.613
						206	-14.454	-12.666	-14.376	-12.409	-14.432	-12.524
						205	-12.533	-10.451	-12.425	-10.215	-12.471	-10.759
						204	-10.262	-7.6139	-10.085	-7.427	-10.155	-8.1307
						203	-7.838	-4.391	-7.524	-4.2554	-7.6413	-4.9093
						202	-5.4222	-0.96236	-5.0232	-0.87809	-5.1568	-1.412
						201	-3.1993	2.4294	-2.7299	2.4786	-2.8655	2.1291
						200	-1.3017	5.6305	-0.78298	5.672	-0.93396	5.4736
								8.4848		8.5208		8.4613
								10.9		10.936		10.939

## Sheet: Fig 3-fig sup2a PRL+1% GAL
									PRL+1% GAL
							Wavelength (nm)	Day 0	Day 2	Day 4	Day 6	Day 8	Day 10
							260	0	0	0	0	0	0
							259	0.01852	0.017119	-0.0094395	-0.012606	-0.026687	-0.015531
							258	0.025297	0.037031	-0.032152	-0.033686	-0.062708	-0.034534
							257	0.0087725	0.047244	-0.055054	-0.060361	-0.10414	-0.05502
							256	-0.014571	0.048638	-0.078302	-0.08073	-0.1292	-0.06742
							255	-0.037746	0.046982	-0.10254	-0.10661	-0.13826	-0.075489
							254	-0.068944	0.037359	-0.12823	-0.13223	-0.13326	-0.071083
							253	-0.1064	0.022272	-0.1596	-0.15079	-0.12854	-0.07751
							252	-0.16195	-0.014286	-0.19161	-0.18058	-0.12638	-0.08372
							251	-0.21123	-0.042364	-0.22446	-0.21084	-0.13891	-0.097595
							250	-0.25035	-0.067902	-0.27086	-0.24821	-0.1609	-0.12623
							249	-0.27657	-0.088685	-0.33592	-0.31007	-0.21495	-0.18584
							248	-0.28924	-0.10008	-0.37756	-0.35416	-0.25321	-0.2496
							247	-0.31622	-0.13308	-0.42493	-0.41105	-0.30365	-0.3289
							246	-0.36858	-0.1896	-0.49779	-0.47693	-0.37625	-0.41492
							245	-0.45031	-0.27987	-0.58805	-0.56074	-0.48183	-0.52145
							244	-0.57859	-0.4157	-0.7161	-0.67385	-0.62087	-0.656
							243	-0.76595	-0.60521	-0.86822	-0.825	-0.78162	-0.81004
							242	-0.99896	-0.85278	-1.0647	-1.0062	-0.95789	-0.9881
							241	-1.2794	-1.1404	-1.3229	-1.2546	-1.1813	-1.2159
							240	-1.6288	-1.5128	-1.6454	-1.5607	-1.4522	-1.4982
							239	-2.0617	-1.9556	-2.0466	-1.9512	-1.8106	-1.8771
							238	-2.5665	-2.4768	-2.4993	-2.4272	-2.2393	-2.3037
							237	-3.1441	-3.0484	-3.0246	-2.9813	-2.7411	-2.814
							236	-3.803	-3.7017	-3.6254	-3.613	-3.3263	-3.3945
							235	-4.5388	-4.4499	-4.2999	-4.3123	-3.9801	-4.0434
							234	-5.3376	-5.2475	-5.0128	-5.0578	-4.6623	-4.7309
							233	-6.2073	-6.1215	-5.7821	-5.8588	-5.4127	-5.4715
							232	-7.125	-7.0317	-6.5986	-6.6899	-6.1933	-6.2562
							231	-8.0731	-7.9874	-7.4495	-7.556	-7.0013	-7.0713
							230	-9.0494	-8.9814	-8.3315	-8.4415	-7.831	-7.9194
							229	-10.022	-9.9593	-9.2281	-9.3383	-8.6527	-8.7639
							228	-10.967	-10.894	-10.098	-10.191	-9.4333	-9.5857
							227	-11.837	-11.719	-10.896	-11.014	-10.161	-10.355
							226	-12.606	-12.443	-11.613	-11.746	-10.813	-11.067
							225	-13.259	-13.041	-12.198	-12.353	-11.355	-11.682
							224	-13.768	-13.522	-12.646	-12.818	-11.784	-12.164
							223	-14.151	-13.872	-12.978	-13.155	-12.112	-12.521
							222	-14.39	-14.101	-13.222	-13.388	-12.364	-12.755
							221	-14.528	-14.234	-13.371	-13.5	-12.498	-12.861
							220	-14.582	-14.294	-13.427	-13.522	-12.505	-12.872
							219	-14.578	-14.302	-13.42	-13.48	-12.458	-12.845
							218	-14.508	-14.267	-13.365	-13.408	-12.393	-12.791
							217	-14.409	-14.208	-13.317	-13.355	-12.368	-12.722
							216	-14.327	-14.208	-13.308	-13.334	-12.369	-12.656
							215	-14.322	-14.283	-13.392	-13.391	-12.433	-12.669
							214	-14.394	-14.455	-13.547	-13.562	-12.539	-12.759
							213	-14.519	-14.622	-13.766	-13.828	-12.736	-13.001
							212	-14.714	-14.796	-14.015	-14.175	-12.953	-13.268
							211	-14.896	-14.967	-14.274	-14.435	-13.159	-13.509
							210	-15.011	-15.08	-14.432	-14.548	-13.344	-13.647
							209	-14.922	-15.031	-14.392	-14.468	-13.386	-13.664
							208	-14.573	-14.632	-14.145	-14.223	-13.222	-13.544
							207	-13.938	-13.918	-13.66	-13.596	-12.738	-13.075
							206	-12.772	-12.633	-12.683	-12.541	-11.709	-12.119
							205	-11.003	-10.7	-11.085	-10.948	-10.248	-10.569
							204	-8.666	-8.168	-8.8703	-8.7719	-8.1808	-8.4375
							203	-5.9806	-5.2601	-6.279	-6.2287	-5.6966	-5.9257
							202	-3.1798	-2.2702	-3.5174	-3.5206	-2.9813	-3.2417
							201	-0.47482	0.61638	-0.81242	-0.8766	-0.25887	-0.63661
							200	1.9946	3.2392	1.688	1.5186	2.3072	1.7512
							199	4.0752	5.5114	3.8502	3.5743	4.5446	3.7639
							198	5.6606	7.2737	5.5907	5.1879	6.3868	5.4274

## Sheet: Fig 3-fig sup2a PRL+2% GAL
								PRL+2% GAL
						Wavelength (nm)	Day 0	Day 2	Day 4	Day 6	Day 8	Day 10
						260	0	0	0	0	0	0
						259	-0.0029815	-0.004839	-0.002497	-0.007348	-0.0014445	-0.0012268
						258	-0.000648	-0.011955	-0.015	-0.018081	-0.012878	-0.011159
						257	-0.012508	-0.028286	-0.035428	-0.038637	-0.022497	-0.024829
						256	-0.025195	-0.03841	-0.043324	-0.054082	-0.018468	-0.02893
						255	-0.051635	-0.044183	-0.048429	-0.062705	-0.011207	-0.029215
						254	-0.088643	-0.059047	-0.050579	-0.064994	-0.004238	-0.029772
						253	-0.13667	-0.085203	-0.062535	-0.075581	-0.011015	-0.041169
						252	-0.18485	-0.12689	-0.089065	-0.10239	-0.037356	-0.060259
						251	-0.21855	-0.14444	-0.12833	-0.14474	-0.070322	-0.096775
						250	-0.23451	-0.16192	-0.1782	-0.20361	-0.11903	-0.14651
						249	-0.25754	-0.17912	-0.24401	-0.28195	-0.17824	-0.23402
						248	-0.2882	-0.20497	-0.29519	-0.3443	-0.23081	-0.30864
						247	-0.33521	-0.25554	-0.35375	-0.39869	-0.29368	-0.38187
						246	-0.40669	-0.32856	-0.43066	-0.45663	-0.37484	-0.46318
						245	-0.49832	-0.42988	-0.53492	-0.54507	-0.48346	-0.55459
						244	-0.63774	-0.56905	-0.67751	-0.67299	-0.61986	-0.67584
						243	-0.83105	-0.76594	-0.86006	-0.84595	-0.76427	-0.8251
						242	-1.0633	-1.0052	-1.0722	-1.0496	-0.9333	-0.99842
						241	-1.3586	-1.3049	-1.3435	-1.3025	-1.1641	-1.2277
						240	-1.7278	-1.6909	-1.661	-1.6147	-1.4635	-1.5104
						239	-2.1746	-2.1669	-2.0579	-2.0216	-1.8552	-1.8749
						238	-2.6743	-2.7028	-2.5221	-2.498	-2.304	-2.2968
						237	-3.2447	-3.2903	-3.0603	-3.0468	-2.8347	-2.7986
						236	-3.8945	-3.9451	-3.697	-3.6738	-3.4459	-3.3728
						235	-4.6417	-4.6641	-4.3984	-4.3502	-4.1127	-4.0213
						234	-5.457	-5.4376	-5.1367	-5.0623	-4.8142	-4.7251
						233	-6.3379	-6.2621	-5.9076	-5.8034	-5.5658	-5.4855
						232	-7.2598	-7.1193	-6.7116	-6.5964	-6.3504	-6.2927
						231	-8.2355	-8.0302	-7.5514	-7.4492	-7.1652	-7.1254
						230	-9.2358	-8.9884	-8.4249	-8.3487	-7.997	-7.9913
						229	-10.213	-9.9628	-9.3282	-9.2588	-8.8325	-8.8648
						228	-11.143	-10.904	-10.188	-10.142	-9.6472	-9.6954
						227	-11.986	-11.771	-10.988	-10.963	-10.416	-10.479
						226	-12.726	-12.567	-11.683	-11.717	-11.103	-11.171
						225	-13.338	-13.253	-12.266	-12.355	-11.655	-11.753
						224	-13.818	-13.806	-12.733	-12.855	-12.068	-12.191
						223	-14.199	-14.211	-13.118	-13.226	-12.374	-12.506
						222	-14.421	-14.439	-13.447	-13.481	-12.605	-12.708
						221	-14.55	-14.561	-13.637	-13.59	-12.722	-12.811
						220	-14.596	-14.576	-13.694	-13.586	-12.757	-12.833
						219	-14.571	-14.505	-13.652	-13.486	-12.695	-12.819
						218	-14.488	-14.385	-13.565	-13.351	-12.6	-12.767
						217	-14.39	-14.269	-13.477	-13.234	-12.533	-12.715
						216	-14.328	-14.257	-13.417	-13.173	-12.529	-12.697
						215	-14.307	-14.295	-13.458	-13.215	-12.609	-12.745
						214	-14.387	-14.436	-13.58	-13.359	-12.762	-12.88
						213	-14.467	-14.618	-13.793	-13.652	-12.992	-13.156
						212	-14.666	-14.861	-14.044	-14.022	-13.28	-13.442
						211	-14.853	-15.045	-14.301	-14.343	-13.534	-13.726
						210	-15.038	-15.164	-14.501	-14.548	-13.734	-13.85
						209	-15.016	-15.039	-14.619	-14.463	-13.708	-13.841
						208	-14.786	-14.741	-14.423	-14.219	-13.503	-13.697
						207	-14.155	-14.139	-13.817	-13.634	-12.978	-13.242
						206	-13.114	-13.049	-12.675	-12.634	-12.076	-12.245
						205	-11.332	-11.11	-10.948	-10.988	-10.571	-10.542
						204	-8.9524	-8.5835	-8.6031	-8.7588	-8.3982	-8.3501
						203	-6.197	-5.7028	-5.8619	-6.1871	-5.7783	-5.8799
						202	-3.3205	-2.743	-2.9523	-3.4794	-2.9247	-3.3126
						201	-0.48728	0.17949	-0.12344	-0.85518	-0.054885	-0.85751
						200	2.0837	2.8245	2.4693	1.5314	2.6469	1.3238
						199	4.3087	5.1096	4.6951	3.532	5.0157	3.1217
						198	5.9775	6.9007	6.4641	5.1431	6.9485	4.5404

## Sheet: Fig 3-fig sup 2a PRL+5% GAL
									PRL+5% GAL
							Wavelength (nm)	Day 0	Day 2	Day 4	Day 6	Day 8	Day 10
							260	0	0	0	0	0	0
							259	0.0077479	0.025666	-0.013371	0.015581	0.0081111	-0.013507
							258	0.0099349	0.040432	-0.031206	0.023874	0.010489	-0.028868
							257	0.0056801	0.0442	-0.054403	0.02139	0.019514	-0.05246
							256	0.0055604	0.041698	-0.060757	0.023619	0.035469	-0.065656
							255	-0.0043042	0.030572	-0.053688	0.014797	0.048671	-0.064808
							254	-0.017221	0.011661	-0.038305	0.011168	0.044452	-0.049364
							253	-0.043335	-0.029336	-0.034787	-0.0037237	0.022937	-0.032513
							252	-0.079182	-0.078865	-0.042918	-0.042748	-0.013965	-0.02747
							251	-0.10833	-0.10809	-0.065249	-0.097552	-0.058511	-0.051482
							250	-0.13675	-0.11871	-0.10126	-0.17193	-0.12578	-0.094688
							249	-0.15464	-0.12552	-0.15516	-0.25627	-0.20505	-0.15459
							248	-0.17092	-0.12175	-0.21489	-0.31404	-0.27035	-0.19552
							247	-0.20121	-0.14615	-0.27618	-0.37003	-0.33087	-0.24068
							246	-0.25634	-0.19225	-0.35985	-0.45712	-0.39258	-0.3179
							245	-0.3556	-0.28835	-0.47487	-0.56687	-0.48226	-0.42983
							244	-0.49853	-0.43059	-0.61139	-0.70009	-0.5957	-0.57026
							243	-0.69265	-0.63018	-0.77584	-0.85913	-0.72924	-0.75669
							242	-0.93582	-0.87335	-0.96053	-1.0373	-0.89473	-0.95844
							241	-1.2431	-1.1718	-1.2025	-1.2815	-1.1312	-1.2054
							240	-1.6243	-1.5506	-1.5128	-1.5731	-1.4378	-1.5081
							239	-2.0907	-2.0187	-1.9257	-1.9516	-1.8241	-1.9007
							238	-2.6221	-2.5418	-2.4021	-2.3931	-2.2591	-2.3525
							237	-3.2184	-3.1178	-2.9588	-2.903	-2.7638	-2.8708
							236	-3.8793	-3.767	-3.5988	-3.5102	-3.3616	-3.4346
							235	-4.6161	-4.5004	-4.3064	-4.1927	-4.0211	-4.0525
							234	-5.412	-5.2875	-5.0767	-4.9243	-4.7314	-4.7089
							233	-6.2742	-6.1395	-5.884	-5.7015	-5.4799	-5.4213
							232	-7.1778	-7.0402	-6.7254	-6.5371	-6.2632	-6.1763
							231	-8.1293	-7.9957	-7.5863	-7.4004	-7.0846	-6.9799
							230	-9.1018	-8.9872	-8.4548	-8.2965	-7.9259	-7.8108
							229	-10.066	-9.9768	-9.3346	-9.1917	-8.7849	-8.667
							228	-11	-10.914	-10.175	-10.06	-9.6098	-9.4848
							227	-11.856	-11.776	-10.961	-10.876	-10.387	-10.284
							226	-12.616	-12.53	-11.655	-11.609	-11.071	-11.032
							225	-13.236	-13.155	-12.242	-12.194	-11.633	-11.659
							224	-13.718	-13.652	-12.698	-12.644	-12.056	-12.132
							223	-14.078	-14.002	-13.053	-12.986	-12.373	-12.484
							222	-14.297	-14.229	-13.328	-13.246	-12.608	-12.732
							221	-14.441	-14.342	-13.469	-13.396	-12.737	-12.887
							220	-14.499	-14.357	-13.51	-13.448	-12.782	-12.94
							219	-14.488	-14.288	-13.462	-13.422	-12.773	-12.953
							218	-14.407	-14.205	-13.374	-13.373	-12.719	-12.921
							217	-14.31	-14.139	-13.3	-13.326	-12.652	-12.893
							216	-14.246	-14.173	-13.272	-13.31	-12.615	-12.87
							215	-14.27	-14.265	-13.328	-13.355	-12.65	-12.905
							214	-14.384	-14.417	-13.467	-13.532	-12.782	-13.008
							213	-14.523	-14.581	-13.702	-13.819	-13.025	-13.21
							212	-14.714	-14.792	-14.007	-14.157	-13.34	-13.427
							211	-14.87	-15.035	-14.289	-14.421	-13.61	-13.569
							210	-15.077	-15.308	-14.469	-14.542	-13.736	-13.646
							209	-15.024	-15.33	-14.514	-14.453	-13.709	-13.539
							208	-14.738	-15.092	-14.398	-14.182	-13.482	-13.3
							207	-14.07	-14.392	-13.855	-13.561	-12.961	-12.767
							206	-12.994	-13.175	-12.79	-12.389	-12.016	-11.869
							205	-11.253	-11.263	-11.211	-10.578	-10.567	-10.464
							204	-8.8478	-8.8371	-9.0092	-8.2344	-8.4096	-8.4211
							203	-6.0311	-6.0985	-6.4079	-5.5658	-5.7831	-5.9629
							202	-3.0524	-3.2852	-3.6114	-2.7913	-2.9244	-3.2929
							201	-0.12664	-0.53161	-0.84767	-0.14223	-0.071284	-0.63636
							200	2.59	1.974	1.703	2.1877	2.5685	1.8425
							199	4.9531	4.091	3.9073	4.1302	4.8734	4.0176
							198	6.8079	5.6536	5.6771	5.6438	6.7714	5.8219

## Sheet: Fig 3-fig sup 2a GAL
									GAL
						Wavelength (nm)	0 h	6 h	12 h	18 h	24 h	30 h	36 h	42 h	48 h
						260	0	0	0	0	0	0	0	0	0
						259	0.11716	0.012102	0.041525	-0.0025323	0.054106	0.04132	0.11571	-0.0055225	0.012085
						258	0.20526	0.036804	0.074083	0.0027038	0.11131	0.079855	0.24696	-0.0022625	0.013528
						257	0.29239	0.070596	0.15446	-0.01605	0.17658	0.13245	0.38902	0.00823	0.018597
						256	0.36088	0.090685	0.2241	-0.022719	0.2416	0.23517	0.52861	0.054747	0.025026
						255	0.36212	0.099842	0.21191	-0.010428	0.20946	0.39323	0.59497	0.13121	-0.027264
						254	0.33169	0.12237	0.2171	0.046126	0.17512	0.56278	0.64935	0.25591	-0.069247
						253	0.29057	0.12026	0.19816	0.1042	0.1054	0.69055	0.65517	0.34702	-0.11556
						252	0.29514	0.090254	0.22956	0.10249	0.072504	0.7502	0.68589	0.40542	-0.16104
						251	0.28875	0.049051	0.24432	0.065632	0.015388	0.75093	0.66181	0.4343	-0.2002
						250	0.31032	-0.034173	0.28634	-0.025532	0.03377	0.68652	0.6349	0.40786	-0.20214
						249	0.27013	-0.13283	0.26888	-0.10388	0.02319	0.61551	0.57177	0.36745	-0.23908
						248	0.18763	-0.25086	0.21751	-0.15718	0.0024542	0.52077	0.47377	0.30161	-0.29104
						247	0.069973	-0.32483	0.14924	-0.16398	-0.050549	0.45138	0.37691	0.24979	-0.37814
						246	-0.006287	-0.38462	0.057676	-0.17001	-0.098688	0.40744	0.28851	0.17728	-0.41613
						245	-0.091036	-0.3937	-0.044552	-0.13874	-0.17829	0.39421	0.19983	0.13018	-0.49909
						244	-0.16509	-0.40496	-0.15537	-0.10603	-0.28573	0.39245	0.092374	0.078435	-0.60404
						243	-0.28471	-0.40701	-0.2713	-0.084263	-0.38132	0.35901	-0.072131	0.04324	-0.74298
						242	-0.41747	-0.45275	-0.41913	-0.12613	-0.53564	0.28621	-0.29169	-0.0076225	-0.91653
						241	-0.49598	-0.50844	-0.52806	-0.19763	-0.61229	0.17957	-0.4782	-0.036672	-1.038
						240	-0.52445	-0.6337	-0.64239	-0.31132	-0.66442	0.058063	-0.63421	-0.067097	-1.0944
						239	-0.54512	-0.77021	-0.72908	-0.43462	-0.71104	-0.081535	-0.78671	-0.12833	-1.198
						238	-0.5905	-0.90223	-0.83958	-0.57551	-0.79405	-0.22833	-0.93104	-0.22014	-1.2871
						237	-0.68511	-1.0227	-0.99557	-0.74136	-0.95218	-0.36992	-1.094	-0.33302	-1.4812
						236	-0.80039	-1.1349	-1.14	-0.94051	-1.0983	-0.50184	-1.2285	-0.4498	-1.6641
						235	-0.92992	-1.2756	-1.2905	-1.1398	-1.2093	-0.61834	-1.3147	-0.58388	-1.8007
						234	-1.1145	-1.4567	-1.4844	-1.3478	-1.3815	-0.73162	-1.3906	-0.7329	-1.9998
						233	-1.2907	-1.6666	-1.651	-1.5603	-1.5985	-0.8093	-1.4739	-0.87288	-2.1867
						232	-1.5072	-1.901	-1.8984	-1.742	-1.8697	-0.86688	-1.5789	-0.99107	-2.3812
						231	-1.7697	-2.1321	-2.1266	-1.9158	-2.172	-0.9653	-1.7346	-1.0909	-2.5581
						230	-1.9606	-2.4306	-2.2383	-2.1079	-2.3706	-1.1804	-1.8357	-1.2479	-2.6337
						229	-2.18	-2.7899	-2.3775	-2.3753	-2.6297	-1.5053	-2.0232	-1.4693	-2.7854
						228	-2.333	-3.1354	-2.4721	-2.6582	-2.7988	-1.845	-2.2201	-1.6902	-2.8941
						227	-2.5024	-3.4488	-2.5913	-2.9146	-2.9053	-2.1423	-2.4501	-1.9524	-2.9263
						226	-2.631	-3.71	-2.6621	-3.1283	-2.9491	-2.3873	-2.6488	-2.2439	-2.9175
						225	-2.7964	-3.904	-2.7521	-3.2755	-3.0407	-2.5566	-2.8227	-2.4917	-2.9424
						224	-3.0328	-4.0414	-2.7813	-3.3729	-3.0666	-2.7299	-2.9617	-2.7362	-2.9984
						223	-3.3443	-4.1726	-2.8026	-3.4414	-3.1593	-2.8893	-3.0892	-2.9051	-3.035
						222	-3.5529	-4.3102	-2.7349	-3.514	-3.1279	-3.0034	-3.0795	-3.0805	-2.9722
						221	-3.7436	-4.405	-2.7562	-3.6252	-3.2582	-3.132	-3.1492	-3.215	-2.9625
						220	-3.9295	-4.4551	-2.7772	-3.7932	-3.3691	-3.2825	-3.2053	-3.3343	-2.9089
						219	-4.1679	-4.4809	-2.8658	-3.9699	-3.516	-3.4656	-3.4684	-3.3921	-2.9645
						218	-4.5155	-4.5447	-3.0739	-4.1334	-3.782	-3.6567	-3.7547	-3.46	-3.1449
						217	-4.7202	-4.5852	-3.032	-4.3105	-3.9186	-3.8273	-3.9106	-3.5096	-3.2989
						216	-4.9831	-4.6387	-2.8926	-4.5111	-4.1517	-4.0018	-3.9598	-3.6269	-3.5059
						215	-5.1742	-4.7662	-2.6787	-4.732	-4.367	-4.1966	-4.0937	-3.7843	-3.722
						214	-5.443	-4.9488	-2.6074	-4.9214	-4.686	-4.3824	-4.3074	-3.9512	-4.057
						213	-5.7186	-5.2944	-2.778	-5.2793	-5.0703	-4.6844	-4.4646	-4.264	-4.3873
						212	-5.9684	-5.5943	-3.0574	-5.6429	-5.4639	-4.9392	-4.699	-4.5491	-4.9261
						211	-6.3158	-5.8952	-3.601	-6.078	-5.9875	-5.3043	-5.0146	-4.7836	-5.5288
						210	-6.733	-6.0631	-4.33	-6.4724	-6.6387	-5.669	-5.4445	-4.9436	-6.1945
						209	-7.1734	-6.298	-5.2149	-6.8843	-7.3551	-6.132	-5.9821	-5.1886	-6.8482
						208	-7.6645	-6.598	-6.246	-7.3144	-8.1044	-6.6877	-6.6058	-5.5099	-7.5036
						207	-8.1824	-6.9646	-7.3438	-7.7496	-8.8581	-7.3197	-7.3141	-5.8929	-8.1365
						206	-8.6944	-7.4063	-8.5388	-8.184	-9.6262	-8.0021	-8.0818	-6.3636	-8.7705
						205	-9.247	-7.8247	-9.8246	-8.5914	-10.422	-8.6724	-8.9384	-6.846	-9.4273
						204	-9.7182	-8.2085	-11.103	-8.9428	-11.105	-9.2865	-9.7653	-7.3666	-9.9482
						203	-10.174	-8.5732	-12.347	-9.2772	-11.725	-9.87	-10.532	-7.935	-10.387
						202	-10.601	-8.9142	-13.529	-9.5728	-12.327	-10.44	-11.253	-8.4956	-10.781
						201	-11.034	-9.2711	-14.651	-9.8475	-12.855	-11.002	-11.889	-9.031	-11.119
						200	-11.489	-9.6319	-15.693	-10.07	-13.313	-11.552	-12.463	-9.5526	-11.386
								-10.004		-10.261		-12.041		-10.024
								-10.296		-10.421		-12.428		-10.485

## Sheet: Fig 3-fig sup 2a GAL+1% PRL
										GAL+1% PRL
							Wavelength (nm)	0 h	6 h	12 h	18 h	24 h	30 h	36 h	42 h	48 h
							260	0	0	0	0	0	0	0	0	0
							259	-0.0952182	-0.100132	-0.0270329	-0.14361	-0.0550352	-0.097902	0.0269464	-0.0731867	-0.0942969
							258	-0.204601	-0.234626	-0.079597	-0.299901	-0.116782	-0.183133	-0.00445221	-0.155707	-0.212019
							257	-0.257557	-0.296461	-0.062311	-0.399062	-0.13711	-0.220769	-0.0189377	-0.177853	-0.240791
							256	-0.251757	-0.331273	-0.0257642	-0.47737	-0.155155	-0.222394	-0.0518581	-0.179363	-0.243202
							255	-0.239001	-0.362911	-0.00740592	-0.548225	-0.189801	-0.2001	-0.0724908	-0.214417	-0.240325
							254	-0.2399	-0.408499	-0.0192907	-0.638771	-0.245431	-0.178794	-0.102521	-0.269106	-0.248584
							253	-0.354392	-0.516021	-0.0868997	-0.770456	-0.346923	-0.19656	-0.214269	-0.407477	-0.341332
							252	-0.420421	-0.652771	-0.109127	-0.874492	-0.398095	-0.194389	-0.294971	-0.464541	-0.400847
							251	-0.474744	-0.770473	-0.139837	-0.99912	-0.436217	-0.168411	-0.416973	-0.515257	-0.475554
							250	-0.499276	-0.856137	-0.178858	-1.13396	-0.470982	-0.180769	-0.566413	-0.539355	-0.555585
							249	-0.539887	-0.894582	-0.256989	-1.27151	-0.504279	-0.191375	-0.687049	-0.560961	-0.655866
							248	-0.674228	-0.974652	-0.427609	-1.45777	-0.581994	-0.290465	-0.845397	-0.658954	-0.819463
							247	-0.792647	-1.02291	-0.550649	-1.58729	-0.604432	-0.321328	-0.917424	-0.685663	-0.90209
							246	-0.955796	-1.05075	-0.663915	-1.74087	-0.658121	-0.366442	-1.03906	-0.767358	-0.98877
							245	-1.1112	-1.10601	-0.739646	-1.87013	-0.756469	-0.411841	-1.20928	-0.901851	-1.1066
							244	-1.33044	-1.20382	-0.878238	-2.08441	-0.931577	-0.555537	-1.44448	-1.12993	-1.29006
							243	-1.52028	-1.306	-1.03549	-2.23221	-1.18428	-0.717409	-1.67656	-1.37106	-1.48138
							242	-1.74538	-1.47959	-1.22163	-2.41751	-1.49358	-0.958644	-1.92921	-1.62674	-1.6769
							241	-1.96151	-1.70147	-1.42083	-2.54928	-1.84108	-1.23117	-2.17398	-1.90927	-1.9133
							240	-2.23035	-1.9284	-1.61186	-2.70834	-2.15696	-1.51193	-2.4441	-2.2599	-2.24389
							239	-2.51205	-2.14747	-1.79258	-2.92787	-2.50905	-1.7911	-2.72749	-2.65199	-2.5778
							238	-2.79989	-2.40568	-2.03065	-3.2018	-2.89278	-2.09919	-3.0427	-3.04747	-3.01985
							237	-3.12343	-2.70843	-2.29955	-3.56015	-3.25201	-2.42029	-3.39035	-3.5011	-3.52135
							236	-3.47457	-2.94825	-2.60383	-3.8842	-3.53397	-2.74917	-3.67647	-3.9586	-4.04123
							235	-3.77194	-3.06431	-2.86642	-4.12253	-3.71602	-3.09069	-4.00877	-4.39903	-4.5658
							234	-3.90301	-3.08745	-3.01535	-4.20761	-3.83243	-3.40459	-4.32786	-4.81252	-5.02025
							233	-3.97409	-3.03666	-3.04652	-4.23218	-3.94862	-3.69091	-4.74772	-5.22234	-5.46007
							232	-3.94581	-3.03022	-3.04012	-4.22346	-4.04639	-3.95167	-5.18139	-5.67265	-5.90027
							231	-3.96505	-3.05208	-3.0625	-4.24064	-4.16507	-4.19995	-5.60193	-6.19916	-6.36983
							230	-4.01399	-3.13057	-3.07099	-4.30471	-4.25105	-4.51254	-6.05604	-6.81528	-6.95338
							229	-4.14791	-3.23209	-3.08971	-4.31853	-4.34036	-4.8807	-6.55181	-7.48221	-7.60133
							228	-4.10573	-3.29227	-3.00562	-4.23738	-4.30872	-5.20748	-6.95075	-8.03735	-8.1942
							227	-4.09781	-3.27528	-2.98758	-4.20914	-4.2295	-5.53921	-7.35471	-8.6197	-8.83676
							226	-4.05861	-3.27618	-2.97103	-4.17178	-4.12078	-5.85626	-7.64066	-9.19266	-9.43569
							225	-4.096	-3.24527	-3.06477	-4.20554	-4.08188	-6.09459	-7.84572	-9.87248	-10.1116
							224	-4.12276	-3.30932	-3.15694	-4.19532	-4.01765	-6.30188	-7.97995	-10.5629	-10.701
							223	-4.08474	-3.33645	-3.18941	-4.08516	-3.94655	-6.32473	-7.97033	-11.1366	-11.1612
							222	-4.09883	-3.46856	-3.27542	-3.99046	-3.95331	-6.35629	-8.00872	-11.631	-11.4787
							221	-4.08623	-3.55923	-3.31272	-3.90165	-4.04592	-6.29056	-8.01778	-11.8702	-11.6001
							220	-4.19335	-3.73829	-3.36726	-3.80794	-4.05901	-6.25117	-7.80486	-11.9362	-11.5034
							219	-4.35419	-3.93685	-3.36856	-3.67025	-4.00223	-6.1535	-7.29767	-11.7431	-11.1874
							218	-4.61895	-4.1218	-3.31305	-3.62009	-3.8337	-5.89309	-6.5636	-11.2973	-10.5634
							217	-4.71544	-4.20748	-3.25631	-3.44452	-3.67339	-5.2547	-5.65042	-10.3465	-9.58781
							216	-4.80662	-4.40249	-3.41608	-3.45443	-3.55035	-4.34248	-4.61425	-9.07605	-8.21418
							215	-4.6174	-4.60382	-3.54462	-3.61802	-3.47616	-3.05239	-3.02371	-7.29317	-6.46277
							214	-4.6531	-4.87471	-3.92803	-3.91643	-3.63816	-1.69947	-1.27781	-5.26889	-4.48965
							213	-4.66379	-4.89852	-4.12827	-4.00122	-4.06846	-0.267982	0.476133	-2.85299	-2.21927
							212	-5.07887	-4.92094	-4.42337	-4.23918	-4.92994	1.35407	2.26363	-0.301992	0.239997
							211	-5.61951	-5.1846	-4.78481	-4.62003	-5.78888	2.9729	4.10019	2.30285	2.78605
							210	-6.26222	-5.70129	-5.21138	-5.12579	-6.64292	4.56884	5.99553	4.91135	5.36636
							209	-7.07263	-6.49776	-5.74162	-5.83518	-7.50959	6.09018	7.81144	7.40615	7.84038
							208	-7.93535	-7.48467	-6.35001	-6.64304	-8.29507	7.51762	9.69885	9.76622	10.2437
							207	-8.95832	-8.62396	-7.07468	-7.58656	-9.06237	8.77799	11.5066	11.8802	12.4036
							206	-10.047	-9.89452	-7.84195	-8.58416	-9.74611	9.82391	13.1933	13.7142	14.2768
							205	-11.1775	-11.2271	-8.65933	-9.56917	-10.3657	10.7013	14.7354	15.3042	15.9092
							204	-12.2351	-12.606	-9.46955	-10.5865	-10.8448	11.4332	16.1369	16.6151	17.249
							203	-13.3059	-13.9945	-10.3313	-11.6531	-11.2318	11.9954	17.3498	17.5825	18.266
							202	-14.2993	-15.4052	-11.1796	-12.6814	-11.5617	12.4024	18.3719	18.1746	18.969
							201	-15.2488	-16.7509	-12.048	-13.6676	-11.828	12.6228	19.1409	18.4008	19.3102
							200	-16.0747	-18.0861	-12.8124	-14.4832	-11.9144	12.6529	19.7078	18.4093	19.4657

## Sheet: Fig 3-fig sup 2a GAL+2% PRL
										GAL+2% PRL
							Wavelength (nm)	0 h	6 h	12 h	18 h	24 h	30 h	36 h	42 h	48 h
							260	0	0	0	0	0	0	0	0	0
							259	-0.0467998	-0.00112054	-0.0249267	-0.115704	0.103786	-0.030979	-0.0489543	-0.0747285	-0.128658
							258	-0.131991	0.00289177	-0.0488841	-0.213913	0.182907	-0.0777022	-0.0931234	-0.142248	-0.275734
							257	-0.198275	0.110239	-0.0327835	-0.247529	0.261773	-0.0810289	-0.0843922	-0.112746	-0.360719
							256	-0.236081	0.231735	0.000627705	-0.285654	0.351976	-0.0592507	-0.0887345	-0.0530509	-0.443405
							255	-0.258036	0.31851	0.0381602	-0.308714	0.417413	-0.0336363	-0.134046	-0.00163736	-0.549258
							254	-0.269632	0.346365	0.093151	-0.375378	0.481603	-0.0342923	-0.192558	0.0409936	-0.677248
							253	-0.354802	0.276335	0.0695799	-0.514778	0.458609	-0.137935	-0.316085	-0.0186683	-0.879416
							252	-0.439944	0.205148	0.0796109	-0.628161	0.448729	-0.232526	-0.37973	-0.0493463	-1.03743
							251	-0.534932	0.0650572	0.0489036	-0.761275	0.409794	-0.322655	-0.46118	-0.0836573	-1.1628
							250	-0.616501	-0.0855337	-0.00626606	-0.880479	0.352665	-0.406703	-0.575033	-0.158789	-1.25794
							249	-0.716979	-0.245736	-0.110053	-1.00007	0.28969	-0.533314	-0.722487	-0.227935	-1.35722
							248	-0.871225	-0.446382	-0.289981	-1.19149	0.155635	-0.706557	-0.922979	-0.370434	-1.52696
							247	-0.979293	-0.601356	-0.415156	-1.35428	0.0157369	-0.890189	-1.06283	-0.456517	-1.64638
							246	-1.09216	-0.783704	-0.534669	-1.51028	-0.108487	-1.00784	-1.18536	-0.576989	-1.76286
							245	-1.20274	-1.03253	-0.723311	-1.65246	-0.270141	-1.11004	-1.29295	-0.697454	-1.90611
							244	-1.46441	-1.3348	-0.945009	-1.798	-0.492739	-1.32101	-1.47872	-0.880391	-2.09101
							243	-1.70035	-1.59002	-1.14258	-1.93908	-0.708789	-1.51731	-1.63807	-1.10977	-2.2719
							242	-1.91628	-1.78263	-1.37932	-2.12084	-0.993887	-1.81342	-1.79728	-1.36903	-2.42078
							241	-2.12562	-1.90104	-1.61491	-2.342	-1.29705	-2.10917	-1.97547	-1.68376	-2.56941
							240	-2.36434	-2.01058	-1.89235	-2.59058	-1.62872	-2.39962	-2.20237	-2.02901	-2.75045
							239	-2.56776	-2.15819	-2.17699	-2.86735	-1.97078	-2.68056	-2.47328	-2.42008	-3.0032
							238	-2.73137	-2.30732	-2.50602	-3.19854	-2.3769	-3.01858	-2.84839	-2.89956	-3.351
							237	-2.90286	-2.54776	-2.84061	-3.60322	-2.82633	-3.39468	-3.28487	-3.43961	-3.73406
							236	-3.09101	-2.68498	-3.20586	-4.04718	-3.28366	-3.84399	-3.73784	-3.94454	-4.16217
							235	-3.30885	-2.83092	-3.51035	-4.45183	-3.78305	-4.29066	-4.21873	-4.4133	-4.58804
							234	-3.42747	-2.83621	-3.65917	-4.70999	-4.30276	-4.73691	-4.62202	-4.75536	-4.97899
							233	-3.52439	-2.81569	-3.74185	-4.92828	-4.85791	-5.20241	-5.07707	-5.11587	-5.39793
							232	-3.57434	-2.83309	-3.73053	-5.14144	-5.3649	-5.72469	-5.57174	-5.55696	-5.90792
							231	-3.65235	-2.93422	-3.71914	-5.3742	-5.87785	-6.33468	-6.12156	-6.1202	-6.52637
							230	-3.74529	-3.07043	-3.72783	-5.65612	-6.39583	-7.01539	-6.75053	-6.79445	-7.19733
							229	-3.86351	-3.25471	-3.85184	-5.98306	-7.02863	-7.8126	-7.49655	-7.52715	-7.90889
							228	-3.88648	-3.37955	-3.90379	-6.21613	-7.59753	-8.46188	-8.16994	-8.15719	-8.54252
							227	-3.8646	-3.56883	-3.99047	-6.47347	-8.17822	-9.16568	-8.9075	-8.79575	-9.19863
							226	-3.82058	-3.73047	-3.99293	-6.67307	-8.71674	-9.81473	-9.58822	-9.39419	-9.90978
							225	-3.87902	-3.97689	-4.06662	-6.93474	-9.27648	-10.4722	-10.3407	-9.99748	-10.7042
							224	-3.87906	-4.11971	-4.09906	-7.20374	-9.77305	-11.0807	-11.0237	-10.5767	-11.4799
							223	-3.81492	-4.23643	-4.10588	-7.34193	-10.1514	-11.5988	-11.5295	-11.028	-12.0167
							222	-3.69078	-4.38301	-4.18797	-7.41496	-10.4164	-11.9454	-11.9224	-11.3277	-12.4087
							221	-3.63535	-4.53746	-4.24202	-7.379	-10.6409	-12.136	-12.0586	-11.4964	-12.5514
							220	-3.69524	-4.68445	-4.23306	-7.19292	-10.6818	-12.0971	-12.0667	-11.3872	-12.4928
							219	-3.71945	-4.64838	-4.20658	-6.9785	-10.42	-11.7454	-11.7277	-11.024	-12.1488
							218	-3.73843	-4.56583	-4.17248	-6.68053	-9.87811	-11.0994	-11.1023	-10.3653	-11.5247
							217	-3.67952	-4.26909	-4.21624	-6.20527	-8.82817	-10.0517	-9.95056	-9.29435	-10.5037
							216	-3.91965	-4.0607	-4.33212	-5.47084	-7.65058	-8.62302	-8.56601	-7.99585	-9.2315
							215	-4.0403	-3.84102	-4.39729	-4.54878	-6.04096	-6.66951	-6.73987	-6.29442	-7.49071
							214	-4.26407	-3.96204	-4.71214	-3.54587	-4.24262	-4.44547	-4.70667	-4.40108	-5.41079
							213	-4.56504	-4.14399	-5.05667	-2.33178	-2.25263	-2.11864	-2.49901	-2.16283	-2.84565
							212	-5.07946	-4.4967	-5.627	-1.10931	-0.0285165	0.247419	-0.252671	0.256778	-0.159637
							211	-5.74409	-5.03486	-6.15943	0.212234	2.29324	2.59233	2.09958	2.74874	2.51958
							210	-6.49144	-5.61774	-6.60821	1.61109	4.69417	4.87913	4.54031	5.25222	5.12686
							209	-7.4029	-6.37605	-7.10085	2.93558	7.06173	7.01486	6.88582	7.58472	7.53316
							208	-8.34992	-7.19094	-7.55873	4.20927	9.41474	8.98942	9.16707	9.80193	9.75024
							207	-9.36909	-8.1251	-8.0822	5.34323	11.595	10.7346	11.228	11.798	11.6962
							206	-10.3831	-9.10389	-8.60914	6.35632	13.5458	12.2348	13.0362	13.5905	13.3805
							205	-11.3735	-10.1369	-9.11873	7.21559	15.2252	13.4441	14.6124	15.1894	14.7519
							204	-12.3158	-11.1697	-9.5143	7.96671	16.6934	14.4376	15.9935	16.5386	15.7902
							203	-13.2208	-12.2247	-9.84288	8.53114	17.8807	15.0596	17.0794	17.5884	16.4567
							202	-14.0955	-13.2411	-10.1027	8.93258	18.7741	15.437	17.8795	18.3339	16.7575
							201	-14.9143	-14.203	-10.3868	9.12302	19.3594	15.488	18.3192	18.7386	16.7586
							200	-15.5427	-14.9719	-10.5659	9.20903	19.738	15.2925	18.6036	18.9355	16.5676

## Sheet: Fig 3-fig sup 2a GAL+5% PRL
										GAL+5% PRL
							Wavelength (nm)	0 h	6 h	12 h	18 h	24 h	30 h	36 h	42 h	48 h
							260	0	0	0	0	0	0	0	0	0
							259	-0.0599277	-0.00537029	-0.0795504	-0.0811424	-0.00455211	-0.0678497	-0.0552281	-0.019941	-0.11659
							258	-0.115651	-0.029301	-0.172621	-0.183706	-0.071948	-0.153263	-0.125091	-0.111373	-0.239703
							257	-0.0495954	-0.0330646	-0.149933	-0.235291	-0.080223	-0.174757	-0.158734	-0.132295	-0.279037
							256	0.0437865	-0.00680319	-0.0900965	-0.271651	-0.0724475	-0.153149	-0.168012	-0.104518	-0.285451
							255	0.151947	-0.0314166	-0.0538661	-0.309798	-0.0865966	-0.133259	-0.175454	-0.057914	-0.30011
							254	0.19043	-0.0824302	-0.0473027	-0.370617	-0.116733	-0.141452	-0.204518	-0.00843789	-0.359821
							253	0.118986	-0.229383	-0.135261	-0.510211	-0.244278	-0.229604	-0.335257	-0.0772297	-0.519637
							252	0.0425497	-0.337371	-0.220513	-0.594355	-0.352654	-0.292247	-0.452959	-0.0950179	-0.64099
							251	-0.0302001	-0.423384	-0.324152	-0.657559	-0.478743	-0.339507	-0.569846	-0.153963	-0.784911
							250	-0.0700516	-0.51447	-0.425581	-0.666374	-0.587096	-0.341218	-0.667446	-0.212458	-0.888855
							249	-0.11649	-0.6438	-0.524215	-0.709095	-0.6658	-0.345229	-0.718065	-0.301227	-1.00115
							248	-0.231504	-0.864436	-0.684984	-0.811649	-0.79879	-0.437185	-0.829054	-0.415643	-1.15032
							247	-0.310529	-1.01545	-0.80616	-0.889547	-0.859746	-0.512424	-0.90615	-0.486259	-1.26278
							246	-0.415732	-1.1894	-0.928231	-0.927469	-0.98585	-0.640838	-1.02358	-0.561234	-1.36036
							245	-0.552089	-1.3455	-1.02452	-1.00157	-1.11557	-0.773102	-1.14218	-0.702742	-1.50154
							244	-0.753038	-1.58608	-1.17806	-1.14634	-1.32073	-0.938573	-1.32289	-0.932818	-1.6792
							243	-0.937883	-1.80312	-1.27603	-1.34197	-1.49211	-1.09177	-1.52377	-1.12332	-1.85257
							242	-1.21442	-2.0633	-1.40888	-1.60754	-1.6892	-1.31696	-1.71821	-1.35106	-2.04968
							241	-1.48364	-2.29564	-1.57833	-1.89972	-1.89345	-1.63216	-1.96039	-1.57636	-2.27848
							240	-1.78221	-2.49651	-1.7949	-2.23594	-2.15399	-1.97924	-2.24253	-1.91354	-2.55536
							239	-2.09905	-2.62685	-2.06107	-2.62509	-2.42169	-2.37316	-2.56025	-2.27173	-2.84264
							238	-2.3737	-2.76396	-2.40166	-3.0633	-2.71856	-2.77519	-2.94395	-2.70067	-3.19325
							237	-2.64794	-2.88032	-2.75074	-3.52546	-3.08395	-3.21529	-3.35164	-3.17025	-3.60424
							236	-2.86916	-3.047	-3.14301	-4.0091	-3.49217	-3.68697	-3.74689	-3.70583	-4.02556
							235	-3.07741	-3.17716	-3.47143	-4.47037	-3.96739	-4.15753	-4.15525	-4.24948	-4.46352
							234	-3.18237	-3.18627	-3.79443	-4.91569	-4.38054	-4.60668	-4.55948	-4.75251	-4.86891
							233	-3.24297	-3.15807	-4.0898	-5.39165	-4.79683	-5.01987	-5.02651	-5.20935	-5.32196
							232	-3.26137	-3.09291	-4.48758	-5.88189	-5.23002	-5.45137	-5.56937	-5.6916	-5.81187
							231	-3.2428	-3.15274	-4.95878	-6.46145	-5.76096	-5.97781	-6.22704	-6.21155	-6.40801
							230	-3.23145	-3.22888	-5.45202	-7.07293	-6.40082	-6.58987	-6.95495	-6.80023	-7.08223
							229	-3.27826	-3.33841	-5.95185	-7.73068	-7.15623	-7.24265	-7.77476	-7.48717	-7.84001
							228	-3.3082	-3.26587	-6.33993	-8.2772	-7.82876	-7.80898	-8.45997	-8.08617	-8.48073
							227	-3.42248	-3.19838	-6.75691	-8.84989	-8.54104	-8.40628	-9.11066	-8.72427	-9.13957
							226	-3.53767	-3.12935	-7.13427	-9.4042	-9.17647	-8.94221	-9.66617	-9.27012	-9.72209
							225	-3.67703	-3.18216	-7.54566	-10.0682	-9.8518	-9.59076	-10.2016	-9.81431	-10.3683
							224	-3.76184	-3.30789	-7.85235	-10.6578	-10.467	-10.2554	-10.7662	-10.3498	-10.9445
							223	-3.80217	-3.40037	-8.01082	-11.1082	-10.9268	-10.803	-11.2211	-10.7677	-11.4254
							222	-3.80577	-3.58403	-8.10756	-11.4993	-11.3504	-11.2248	-11.5451	-11.0858	-11.744
							221	-3.84746	-3.71603	-8.01539	-11.7393	-11.6213	-11.3554	-11.6439	-11.2397	-11.8925
							220	-3.84942	-3.91699	-7.83627	-11.7734	-11.7151	-11.3342	-11.642	-11.1813	-11.8562
							219	-3.873	-3.9823	-7.27839	-11.4529	-11.417	-11.0826	-11.3852	-10.8457	-11.5508
							218	-3.97763	-4.01609	-6.55452	-10.8548	-10.8098	-10.6028	-10.8648	-10.2521	-10.9608
							217	-3.94296	-3.88106	-5.4083	-9.81652	-9.75829	-9.67451	-9.92484	-9.21738	-9.99631
							216	-4.06024	-3.88626	-4.00865	-8.43627	-8.45107	-8.35903	-8.64093	-8.0556	-8.74783
							215	-3.99324	-3.95862	-2.34262	-6.72179	-6.79812	-6.62713	-7.01798	-6.48571	-7.14863
							214	-4.14646	-4.23411	-0.637582	-4.80684	-5.09609	-4.74668	-4.9764	-4.8017	-5.3766
							213	-4.19308	-4.59392	1.35551	-2.50973	-3.14553	-2.50583	-2.65322	-2.59393	-3.13566
							212	-4.58728	-5.33218	3.16669	0.0471118	-1.07278	-0.23721	-0.429593	-0.034942	-0.731411
							211	-5.11489	-5.95542	5.02976	2.63519	1.15845	2.16266	1.83933	2.57793	1.70747
							210	-5.68096	-6.47084	6.86705	5.16169	3.52132	4.6624	4.12073	5.20409	4.1416
							209	-6.32801	-6.98332	8.63851	7.51636	5.82175	7.14152	6.28866	7.70825	6.45848
							208	-6.94073	-7.43041	10.336	9.74123	8.10839	9.55248	8.37677	10.118	8.70969
							207	-7.65278	-7.88046	11.9168	11.6927	10.199	11.7838	10.3094	12.3356	10.7306
							206	-8.47249	-8.21582	13.3459	13.4076	12.0943	13.8254	12.0864	14.2964	12.5335
							205	-9.43503	-8.44356	14.5854	14.8088	13.7978	15.6556	13.6488	15.9834	14.076
							204	-10.4303	-8.5346	15.5973	15.9179	15.3107	17.2365	15.0373	17.4039	15.4017
							203	-11.4062	-8.61579	16.3258	16.6681	16.5451	18.5066	16.1425	18.5264	16.4131
							202	-12.2521	-8.66181	16.8391	17.0829	17.5398	19.5025	16.9715	19.3328	17.1245
							201	-12.9852	-8.73727	17.1205	17.1526	18.2318	20.1313	17.47	19.7694	17.5071
							200	-13.5901	-8.72791	17.2897	17.0096	18.7569	20.5472	17.7097	19.9118	17.6837
