# Supplementary material for: Co-aggregation and secondary nucleation in the life cycle of human prolactin/galanin functional amyloids
Source: eLife. 2022 Mar 8;11:e73835. doi: 10.7554/eLife.73835 (PMC8993219; doi:10.7554/eLife.73835)
Supplement: Figure 3—figure supplement 3—source data 1. [file elife-73835-fig3-figsupp3-data1.xlsx]

## Sheet: Fig 3-fig sup3a left pan inset
								Mean	StdErr
							Day 0	265.98	7.0879
							Day 10	1160.4	61.175

## Sheet: Fig 3-fig sup3a left panel
							PRL+1% PRL-GAL		PRL+2% PRL-GAL		PRL+5% PRL-GAL		5% PRL-GAL		PRL
						Time (d)	Mean	StdErr	Mean	StdErr	Mean	StdErr	Mean	StdErr	Mean	StdErr
						0	249.81	16.995	257.06	10.959	288.01	21.499	262.94	9.1565	238.13	9.3741
						1	244.35	5.4934	271.68	23.305	234.38	13.467	285.46	15.416	249.09	6.342
						2	304.88	24.631	284.28	17.812	288.11	11.058	275.28	22.559	305.4	15.215
						3	260.1	7.0926	263.8	22.074	240.72	7.3848	327.9	47.957	278.02	17.097
						4	260	26.697	241.29	20.626	295.13	15.874	300.95	11.084	246.32	20.917
						5	267.51	13.932	263.5	4.6676	292.03	4.2333	284.87	24.316	280.18	12.721
						6	242.62	6.1433	253.14	12.455	238.59	3.9951	226.66	27.88	249.02	11.827
						7	282.04	20.335	276.95	18.563	248.71	25.913	262.94	13.356	284.28	17.545
						8	280.7	30.395	251.34	7.8829	308.17	18.014	277.21	34.275	259.11	19.738
						9	273.73	18.624	266.67	32.439	267.55	5.6182	280.99	9.884	290.98	20.087
						10	289.61	13.687	267.62	20.85	313.48	20.808	298.94	15.065	290.08	37.676

## Sheet: Fig 3-fig sup3a right pan inset
							Mean	StdErr
						Day 0	240.66	9.8845
						Day 10	1153.7	30.148

## Sheet: Fig 3-fig sup3a right panel
							GAL+1% PRL-GAL		GAL+2% PRL-GAL		GAL+5% PRL-GAL		5% PRL-GAL		GAL
						Time (d)	Mean	StdErr	Mean	StdErr	Mean	StdErr	Mean	StdErr	Mean	StdErr
						0	267.55	6.4474	250.18	7.9567	269.68	12.36	224.13	12.349	250.62	13.186
						1	292.85	8.0637	275.63	11.992	252.96	28.352	275.42	10.492	269.37	0.99578
						2	267.19	32.354	278.99	23.695	290.14	11.191	295.44	18.177	239.83	17.325
						3	293.25	15.335	297.35	7.735	285.81	13.699	298.44	10.381	248.07	12.35
						4	311.19	19.433	254.14	21.807	253.55	13.691	273.78	9.5322	225.29	14.92
						5	287.42	19.48	230.46	6.5454	274.92	26.025	257.62	17.235	249.84	17.769
						6	266.01	11.815	231.02	1.3855	274.45	25.217	245.95	18.936	244.8	14.54
						7	245.62	10.61	284.47	7.5578	265.1	19.98	279.72	3.6551	282.74	8.6011
						8	314.3	9.1513	285.4	3.2754	297.21	17.007	306.09	17.169	280.08	7.3207
						9	273.67	28.351	265.6	1.2263	260.3	23.227	288.75	25.967	281.71	34.023
						10	258.43	32.976	284.36	30.237	263.92	25.552	309.3	34.917	239.26	2.4424

## Sheet: Fig 3-fig sup3b 5% PRL-GAL
									5% PRL-GAL
							Wavelength (nm)	Day 0	Day 2	Day 4	Day 6	Day 8	Day 10
							260	0	0	0	0	0	0
							259	0.0015502	0.031879	0.016329	0.024943	0.0013267	0.004894
							258	-0.0024254	0.054841	0.031004	0.046398	0.00012675	0.010273
							257	0.00046375	0.068149	0.049334	0.069475	0.010697	0.024715
							256	0.0031247	0.067178	0.075472	0.089857	0.013851	0.037212
							255	0.013094	0.067101	0.085352	0.11575	0.025543	0.049344
							254	0.025782	0.066781	0.089503	0.13869	0.039601	0.059368
							253	0.035731	0.057937	0.078929	0.16135	0.05806	0.073039
							252	0.037421	0.028498	0.06091	0.16808	0.062364	0.08066
							251	0.030109	0.0089616	0.037447	0.17384	0.062848	0.095152
							250	-0.012335	-0.032539	-0.0053625	0.14722	0.041275	0.095862
							249	-0.056804	-0.071078	-0.047269	0.10457	0.0009884	0.098555
							248	-0.12739	-0.13097	-0.10805	0.036711	-0.07394	0.069736
							247	-0.19316	-0.18607	-0.16045	-0.025904	-0.14862	0.03022
							246	-0.26518	-0.25034	-0.22796	-0.097391	-0.23257	-0.02255
							245	-0.3583	-0.33635	-0.30459	-0.1845	-0.32248	-0.09921
							244	-0.48564	-0.46753	-0.42296	-0.32756	-0.45563	-0.21909
							243	-0.6271	-0.63008	-0.56575	-0.49728	-0.61048	-0.3815
							242	-0.81574	-0.83886	-0.75592	-0.70744	-0.81785	-0.59786
							241	-1.03	-1.0746	-0.99732	-0.94379	-1.0381	-0.85418
							240	-1.316	-1.3757	-1.2995	-1.2338	-1.3228	-1.1767
							239	-1.6778	-1.749	-1.6784	-1.5859	-1.6761	-1.5597
							238	-2.0938	-2.1749	-2.1113	-1.9872	-2.0961	-1.9984
							237	-2.5971	-2.6624	-2.6119	-2.4564	-2.5915	-2.4957
							236	-3.1708	-3.2131	-3.1728	-3.0006	-3.1533	-3.0462
							235	-3.8168	-3.8361	-3.8097	-3.6287	-3.7878	-3.6779
							234	-4.5434	-4.5345	-4.5157	-4.3362	-4.4843	-4.382
							233	-5.2983	-5.2634	-5.2561	-5.0851	-5.2176	-5.127
							232	-6.0908	-6.0467	-6.0556	-5.8819	-6.0038	-5.9036
							231	-6.8658	-6.8295	-6.8459	-6.6939	-6.8001	-6.6811
							230	-7.6511	-7.6502	-7.6705	-7.5439	-7.6477	-7.4935
							229	-8.4029	-8.4269	-8.4593	-8.3635	-8.4657	-8.2894
							228	-9.1159	-9.1675	-9.1865	-9.1337	-9.2573	-9.0573
							227	-9.7582	-9.8221	-9.8406	-9.8167	-9.9713	-9.7553
							226	-10.352	-10.41	-10.439	-10.409	-10.621	-10.378
							225	-10.87	-10.904	-10.957	-10.906	-11.167	-10.879
							224	-11.291	-11.296	-11.358	-11.288	-11.573	-11.274
							223	-11.641	-11.629	-11.664	-11.582	-11.88	-11.607
							222	-11.896	-11.877	-11.876	-11.782	-12.08	-11.834
							221	-12.064	-12.041	-12.018	-11.899	-12.198	-11.994
							220	-12.143	-12.096	-12.059	-11.915	-12.214	-12.031
							219	-12.119	-12.069	-12.034	-11.878	-12.153	-11.981
							218	-12.03	-12.056	-11.996	-11.82	-12.077	-11.884
							217	-11.92	-12.035	-11.963	-11.762	-12.024	-11.813
							216	-11.842	-12.05	-11.951	-11.745	-12.013	-11.773
							215	-11.831	-12.047	-11.978	-11.772	-12.009	-11.773
							214	-11.913	-12.13	-12.074	-11.904	-12.115	-11.847
							213	-12.112	-12.279	-12.292	-12.114	-12.275	-11.986
							212	-12.384	-12.446	-12.582	-12.364	-12.463	-12.159
							211	-12.649	-12.617	-12.856	-12.545	-12.625	-12.353
							210	-12.884	-12.719	-12.991	-12.6	-12.708	-12.531
							209	-12.949	-12.66	-12.969	-12.446	-12.633	-12.581
							208	-12.676	-12.261	-12.703	-12.151	-12.335	-12.327
							207	-12.061	-11.488	-12.08	-11.685	-11.823	-11.864
							206	-11.087	-10.455	-11.014	-10.729	-10.9	-11.042
							205	-9.4202	-8.9679	-9.5861	-9.2139	-9.4707	-9.7943
							204	-7.2075	-6.9768	-7.6394	-7.0953	-7.6008	-7.8068
							203	-4.6754	-4.6326	-5.3592	-4.5796	-5.4519	-5.3131
							202	-2.015	-2.1321	-2.91	-1.8845	-3.1669	-2.489
							201	0.55767	0.33442	-0.52485	0.7775	-0.92956	0.41367
							200	2.8891	2.5662	1.6519	3.221	1.0786	3.2079
							199	4.8534	4.4855	3.494	5.3688	2.8079	5.7236
							198	6.4	6.0427	4.967	7.1515	4.1772	7.8527

## Sheet: Fig 3-fig sup3b GAL+1% PRL-GAL
									GAL+1% PRL-GAL
							Wavelength (nm)	Day 0	Day 2	Day 4	Day 6	Day 8	Day 10
							260	0	0	0	0	0	0
							259	-0.031285	-0.10051	0.10639	-0.014329	-0.082574	-0.060879
							258	0.030946	-0.13882	0.17949	0.00079254	-0.12444	-0.12943
							257	0.09951	-0.116	0.29444	0.080826	-0.15905	-0.06981
							256	0.21997	-0.10881	0.35563	0.20589	-0.18415	-0.036044
							255	0.32762	-0.078029	0.34739	0.33027	-0.25437	0.045631
							254	0.32129	-0.13375	0.27281	0.45138	-0.37935	0.063809
							253	0.22852	-0.1756	0.12244	0.44931	-0.50141	-0.014232
							252	0.052764	-0.30359	-0.12929	0.3796	-0.61812	-0.12715
							251	-0.035568	-0.36728	-0.26632	0.36254	-0.54335	-0.15843
							250	-0.13745	-0.51564	-0.33046	0.409	-0.42973	-0.13965
							249	-0.30526	-0.78197	-0.46739	0.33249	-0.4846	-0.28086
							248	-0.62758	-1.0848	-0.59071	0.1059	-0.52075	-0.4703
							247	-0.96642	-1.4625	-0.70033	-0.10241	-0.68922	-0.64401
							246	-1.3917	-1.801	-0.78367	-0.39941	-0.84215	-0.84646
							245	-1.6584	-1.9937	-0.76559	-0.55873	-0.93147	-0.88193
							244	-1.7349	-2.0505	-0.79675	-0.69265	-0.98957	-0.879
							243	-1.7375	-1.9908	-0.76562	-0.7785	-1.0539	-0.76748
							242	-1.7053	-1.9107	-0.80012	-0.84167	-1.1053	-0.66899
							241	-1.6793	-1.7141	-0.81957	-0.8926	-1.1655	-0.52435
							240	-1.8136	-1.5885	-0.93203	-1.0031	-1.3229	-0.50659
							239	-1.9691	-1.3716	-1.0827	-1.1839	-1.4233	-0.49565
							238	-2.1742	-1.2772	-1.2236	-1.346	-1.5646	-0.5533
							237	-2.1512	-1.0794	-1.1442	-1.3387	-1.5197	-0.54583
							236	-1.9458	-0.8878	-0.89368	-1.1133	-1.3636	-0.44293
							235	-1.7932	-0.73244	-0.76574	-0.9911	-1.2009	-0.45806
							234	-1.8105	-0.61152	-0.66525	-0.91558	-0.97117	-0.4318
							233	-1.9679	-0.79926	-0.71619	-0.99978	-0.88557	-0.53414
							232	-2.0463	-0.89336	-0.64658	-1.0025	-0.66278	-0.38111
							231	-2.0306	-0.98688	-0.54194	-1.0028	-0.46189	-0.21289
							230	-2.1056	-1.1309	-0.52547	-1.0137	-0.33403	-0.096384
							229	-2.2166	-1.2377	-0.55735	-1.0462	-0.20373	-0.057539
							228	-2.4124	-1.3977	-0.70532	-1.1717	-0.24654	-0.069147
							227	-2.5168	-1.4161	-0.77911	-1.2216	-0.27294	-0.082554
							226	-2.6718	-1.479	-0.8511	-1.3684	-0.46408	-0.27315
							225	-2.8932	-1.424	-0.82341	-1.4333	-0.60823	-0.53783
							224	-3.0434	-1.3923	-0.83936	-1.4955	-0.86413	-0.94283
							223	-2.9033	-1.3196	-0.84152	-1.3251	-0.94443	-1.1543
							222	-2.6743	-1.3246	-0.83017	-1.0926	-1.0083	-1.3524
							221	-2.4107	-1.3547	-0.86934	-0.96179	-0.96863	-1.5515
							220	-2.3338	-1.3002	-0.78148	-0.83513	-0.83663	-1.5401
							219	-2.2431	-1.3274	-0.84293	-0.87487	-0.64258	-1.5339
							218	-2.3204	-1.4861	-0.93319	-1.0978	-0.55903	-1.3966
							217	-2.5255	-1.789	-1.1744	-1.6055	-0.61055	-1.4167
							216	-2.6167	-2.0938	-1.3073	-1.9087	-0.64156	-1.2898
							215	-2.7057	-2.2398	-1.3811	-1.8997	-0.48077	-1.1264
							214	-3.0655	-2.5746	-1.6596	-2.0765	-0.47562	-1.0363
							213	-3.5375	-2.877	-1.8825	-2.223	-0.62048	-1.0874
							212	-4.1377	-3.1781	-2.1716	-2.4434	-0.90912	-1.5692
							211	-4.683	-3.0264	-2.2553	-2.5063	-1.2526	-1.9762
							210	-5.0144	-2.8458	-2.6081	-2.5495	-1.698	-2.2362
							209	-5.2146	-2.7773	-3.0912	-2.7231	-2.217	-2.4667
							208	-5.1076	-2.8769	-3.4441	-2.8933	-3.0692	-2.8525
							207	-5.097	-2.7824	-3.6496	-2.7138	-3.3962	-2.9023
							206	-4.9842	-2.2482	-3.5978	-2.5009	-3.4409	-3.0199
							205	-3.9252	-2.0621	-2.5751	-2.2191	-3.0333	-2.945
							204	-3.5632	-2.5415	-2.1999	-2.4745	-3.1294	-3.277
							203	-3.533	-3.3028	-2.3	-2.9424	-3.4057	-3.7998
							202	-3.8645	-4.3356	-2.6917	-3.3538	-3.8058	-4.3991
							201	-4.7676	-5.5521	-3.5073	-3.8398	-4.2987	-5.1738
							200	-6.2377	-7.1232	-4.8649	-4.7697	-5.1337	-6.2016
							199	-7.9393	-8.6572	-6.4112	-5.7829	-6.2597	-7.4144
							198	-9.6983	-9.9678	-8.0699	-6.8137	-7.3944	-8.6895

## Sheet: Fig 3-fig sup3b GAL+2% PRL-GAL
									GAL+2% PRL-GAL
							Wavelength (nm)	Day 0	Day 2	Day 4	Day 6	Day 8	Day 10
							260	0	0	0	0	0	0
							259	0.038352	-0.12215	0.037003	-0.18175	0.0244	-0.086037
							258	0.10256	-0.20631	0.050929	-0.32618	0.064446	-0.095395
							257	0.21991	-0.1787	0.13304	-0.37434	0.14026	-0.052058
							256	0.34722	-0.099873	0.242	-0.3063	0.25932	-0.014672
							255	0.4304	-0.084765	0.28958	-0.22136	0.3501	-0.027139
							254	0.44603	-0.20218	0.30293	-0.18792	0.41372	-0.091532
							253	0.30644	-0.44465	0.17466	-0.26268	0.3836	-0.23149
							252	0.03304	-0.70455	-0.032804	-0.3413	0.25787	-0.4646
							251	-0.1176	-0.83394	-0.084206	-0.32588	0.24437	-0.51044
							250	-0.24647	-0.84596	-0.14814	-0.27391	0.22567	-0.44697
							249	-0.4483	-1.0119	-0.2109	-0.26433	0.048356	-0.43427
							248	-0.66297	-1.1722	-0.27506	-0.34548	-0.11658	-0.49523
							247	-0.87732	-1.4392	-0.3232	-0.51417	-0.29621	-0.6517
							246	-1.0577	-1.7336	-0.44561	-0.84402	-0.43605	-0.83897
							245	-1.0845	-1.7373	-0.47224	-1.1193	-0.50007	-0.85813
							244	-1.0001	-1.6548	-0.54673	-1.2916	-0.6271	-0.84993
							243	-0.84399	-1.4075	-0.45239	-1.3729	-0.69057	-0.78087
							242	-0.61356	-1.1883	-0.37171	-1.3535	-0.60686	-0.72252
							241	-0.36723	-1.0756	-0.30094	-1.348	-0.43159	-0.67238
							240	-0.20616	-1.1308	-0.3497	-1.4516	-0.33527	-0.69324
							239	-0.17834	-1.249	-0.4712	-1.604	-0.32738	-0.72772
							238	-0.30213	-1.3901	-0.59317	-1.6832	-0.43072	-0.82411
							237	-0.35646	-1.408	-0.60647	-1.5521	-0.31857	-0.72883
							236	-0.35053	-1.2516	-0.5781	-1.2457	-0.13901	-0.62392
							235	-0.39819	-1.2768	-0.5192	-0.97434	0.11974	-0.50245
							234	-0.48331	-1.2211	-0.45995	-0.75514	0.4659	-0.41137
							233	-0.68882	-1.3243	-0.45276	-0.71918	0.59577	-0.40723
							232	-0.76367	-1.1985	-0.38943	-0.55101	0.78058	-0.22005
							231	-0.86466	-0.99653	-0.29867	-0.41966	0.77101	-0.041309
							230	-1.0341	-0.91346	-0.27531	-0.40531	0.66839	-0.0036397
							229	-1.1828	-0.83658	-0.23958	-0.52926	0.53799	-0.039371
							228	-1.3372	-0.89644	-0.382	-0.70755	0.36726	-0.19768
							227	-1.4231	-0.87322	-0.51757	-0.81543	0.26594	-0.27184
							226	-1.6508	-1.0394	-0.8627	-0.98507	-0.0072531	-0.53011
							225	-1.9888	-1.2301	-1.113	-1.1441	-0.33849	-0.84145
							224	-2.2917	-1.4571	-1.5273	-1.2496	-0.69702	-1.2373
							223	-2.3616	-1.5631	-1.788	-1.1514	-0.8315	-1.4298
							222	-2.2916	-1.6358	-2.0561	-0.95044	-0.86743	-1.5295
							221	-2.1904	-1.6655	-2.1574	-0.80083	-0.79594	-1.3976
							220	-2.0574	-1.4578	-2.2012	-0.67476	-0.7394	-1.1427
							219	-1.9411	-1.3715	-2.1164	-0.6819	-0.64271	-0.90095
							218	-1.8367	-1.3572	-2.1424	-0.82081	-0.59589	-0.7803
							217	-1.9764	-1.4621	-2.2216	-1.1901	-0.75174	-0.90733
							216	-2.0378	-1.4741	-2.1956	-1.6133	-0.71174	-0.93666
							215	-1.8812	-1.2835	-2.1312	-1.9729	-0.62538	-0.79105
							214	-1.9848	-1.3485	-2.2762	-2.3852	-0.69901	-0.68952
							213	-2.1867	-1.4271	-2.6144	-2.7	-0.86025	-0.66104
							212	-2.6495	-1.8946	-3.0509	-3.0299	-1.2647	-1.0598
							211	-2.7608	-2.1642	-3.4117	-3.1685	-1.5035	-1.5132
							210	-2.5637	-2.3116	-3.8306	-3.2474	-1.741	-2.0713
							209	-2.492	-2.6844	-4.1181	-3.4306	-1.9403	-2.5621
							208	-2.4736	-2.8141	-4.3303	-3.5626	-2.2778	-2.9797
							207	-2.4788	-2.7595	-4.1736	-3.5497	-2.3359	-3.3354
							206	-2.2112	-2.7591	-4.0976	-3.4026	-1.8781	-3.482
							205	-2.3314	-2.7676	-3.8743	-3.2711	-0.89778	-3.1357
							204	-2.7776	-3.4628	-4.2911	-3.5305	-0.82094	-3.1165
							203	-3.3923	-4.5454	-4.9488	-3.8664	-1.341	-3.0976
							202	-4.0303	-5.8911	-5.8677	-4.2896	-2.2587	-2.9587
							201	-4.705	-7.507	-7.056	-4.8081	-3.6817	-2.8233
							200	-5.733	-9.6199	-8.6461	-5.5459	-5.6758	-3.0005
							199	-6.7669	-11.789	-10.417	-6.3083	-7.9929	-3.4314
							198	-7.6645	-13.943	-12.062	-7.0407	-10.362	-4.099

## Sheet: Fig 3-fig sup3b GAL+5% PRL-GAL
									GAL+5% PRL-GAL
							Wavelength (nm)	Day 0	Day 2	Day 4	Day 6	Day 8	Day 10
							260	0	0	0	0	0	0
							259	-0.13752	-0.14329	-0.096447	-0.15977	-0.098258	-0.092121
							258	-0.19952	-0.20508	-0.15099	-0.34864	-0.1579	-0.24885
							257	-0.2309	-0.18173	-0.13244	-0.43348	-0.16735	-0.37273
							256	-0.25352	-0.18137	-0.10745	-0.5211	-0.16936	-0.53627
							255	-0.30107	-0.22902	-0.092248	-0.59327	-0.12046	-0.68432
							254	-0.38861	-0.38716	-0.19801	-0.67717	-0.1787	-0.82954
							253	-0.54365	-0.59282	-0.39308	-0.87637	-0.29116	-1.0313
							252	-0.76854	-0.83683	-0.64524	-1.1045	-0.42981	-1.2198
							251	-0.82731	-0.88774	-0.72525	-1.1619	-0.40196	-1.3124
							250	-0.90778	-0.82143	-0.73821	-1.1785	-0.38053	-1.3269
							249	-1.1248	-0.87225	-0.84416	-1.2824	-0.52413	-1.3673
							248	-1.4264	-0.9801	-1.0308	-1.4965	-0.73029	-1.4782
							247	-1.7857	-1.076	-1.2577	-1.7152	-0.89879	-1.6135
							246	-2.0466	-1.1692	-1.525	-1.9618	-1.0505	-1.7373
							245	-2.1055	-0.99107	-1.6309	-2.0554	-1.0337	-1.7167
							244	-2.0067	-0.74396	-1.6483	-2.0736	-0.98106	-1.6635
							243	-1.9674	-0.49023	-1.5299	-1.9703	-0.9399	-1.5622
							242	-1.9318	-0.30554	-1.3214	-1.8428	-0.90224	-1.494
							241	-1.9332	-0.21298	-1.1108	-1.7145	-0.90749	-1.4012
							240	-1.9679	-0.28751	-1.0712	-1.6493	-1.095	-1.387
							239	-1.9834	-0.37426	-1.0672	-1.6926	-1.2107	-1.3979
							238	-2.0647	-0.52876	-1.0678	-1.7654	-1.2804	-1.3799
							237	-2.0182	-0.54012	-0.94054	-1.713	-1.1458	-1.2377
							236	-1.9422	-0.41892	-0.72676	-1.6166	-0.87728	-1.0086
							235	-1.9579	-0.34303	-0.58059	-1.4987	-0.71208	-0.92827
							234	-1.9257	-0.20051	-0.44184	-1.4124	-0.58394	-0.89084
							233	-2.0052	-0.12633	-0.50292	-1.4203	-0.50951	-0.97721
							232	-1.7948	0.075012	-0.51293	-1.3674	-0.32315	-0.9483
							231	-1.5456	0.21916	-0.52287	-1.3643	-0.11594	-1.0168
							230	-1.3921	0.20687	-0.61374	-1.374	-0.13827	-1.1935
							229	-1.4526	0.078218	-0.73169	-1.4809	-0.2931	-1.3881
							228	-1.7105	-0.072388	-0.9433	-1.5661	-0.52291	-1.6477
							227	-2.0017	-0.26564	-1.2303	-1.7635	-0.7291	-1.7873
							226	-2.2955	-0.52652	-1.6038	-1.9555	-0.94371	-1.9849
							225	-2.4893	-0.80957	-1.9139	-2.1826	-1.1254	-2.1836
							224	-2.7072	-1.1925	-2.0832	-2.4082	-1.2746	-2.3276
							223	-2.8873	-1.5508	-2.0283	-2.4254	-1.3118	-2.3683
							222	-2.9679	-1.7196	-1.7986	-2.3543	-1.2876	-2.2491
							221	-3.0771	-1.7545	-1.4961	-2.2709	-1.2207	-2.1053
							220	-2.9448	-1.6915	-1.1294	-2.0794	-1.0709	-1.9145
							219	-2.7507	-1.6392	-0.86556	-1.8793	-0.99389	-1.8779
							218	-2.5547	-1.7029	-0.76684	-1.6901	-1.0963	-1.9896
							217	-2.6037	-1.9077	-0.89591	-1.7385	-1.3172	-2.1565
							216	-2.5492	-1.9836	-1.0239	-1.7458	-1.4621	-2.1329
							215	-2.4072	-1.9301	-1.1224	-1.7937	-1.3538	-1.9471
							214	-2.5196	-2.0269	-1.4517	-2.1177	-1.5865	-2.0977
							213	-2.7754	-2.2032	-1.8783	-2.6126	-1.8752	-2.2641
							212	-3.2052	-2.6379	-2.4449	-3.1477	-2.4799	-2.6794
							211	-3.552	-2.928	-2.8663	-3.5967	-2.9135	-3.0664
							210	-3.7262	-3.079	-3.1715	-3.9531	-3.2184	-3.4503
							209	-4.0067	-3.1213	-3.5306	-4.4476	-3.3762	-3.962
							208	-4.2375	-3.0448	-3.8799	-4.7962	-3.3918	-3.9576
							207	-4.2725	-2.7853	-3.8016	-5.0739	-3.1923	-3.9032
							206	-3.6717	-2.8785	-3.9126	-4.9426	-2.8672	-3.7741
							205	-3.0664	-2.9148	-3.7883	-4.6893	-1.8696	-3.3837
							204	-3.21	-3.2624	-4.1759	-4.854	-1.7002	-3.4433
							203	-3.7904	-3.6134	-4.742	-5.2911	-1.927	-3.6342
							202	-4.5647	-4.0024	-5.3723	-5.8955	-2.5419	-4.0822
							201	-5.6324	-4.5296	-6.1261	-6.7294	-3.6465	-4.8977
							200	-7.2492	-5.4028	-7.2033	-7.9181	-5.5442	-6.2034
							199	-9.1537	-6.3127	-8.366	-9.1054	-7.6672	-7.6
							198	-11.095	-7.2256	-9.531	-10.248	-9.958	-9.0829

## Sheet: Fig 3-fig sup3b PRL+1% PRL-GAL
									PRL+1% PRL-GAL
							Wavelength (nm)	Day 0	Day 2	Day 4	Day 6	Day 8	Day 10
							260	0	0	0	0	0	0
							259	0.048905	0.027811	0.042486	0.041242	0.025815	0.0057076
							258	0.09811	0.054244	0.079672	0.078412	0.056395	0.012034
							257	0.13073	0.066454	0.10965	0.10746	0.08475	0.024393
							256	0.15019	0.063874	0.12739	0.13227	0.11027	0.033366
							255	0.16011	0.055069	0.14666	0.15148	0.12135	0.042587
							254	0.15588	0.043027	0.15343	0.15981	0.12201	0.044277
							253	0.13912	0.033011	0.15342	0.161	0.12261	0.048401
							252	0.10695	0.019607	0.13592	0.15048	0.11089	0.041933
							251	0.049588	-0.014411	0.09941	0.11621	0.084114	0.028485
							250	0.005652	-0.0497	0.065321	0.091048	0.036433	0.0098618
							249	-0.043307	-0.085627	0.021638	0.051773	-0.01479	-0.02924
							248	-0.096453	-0.12498	-0.023048	0.0063655	-0.058954	-0.071041
							247	-0.15893	-0.18166	-0.091988	-0.065745	-0.11224	-0.12592
							246	-0.23291	-0.25471	-0.18455	-0.15168	-0.19025	-0.21043
							245	-0.33483	-0.36662	-0.30666	-0.26194	-0.27523	-0.31536
							244	-0.48036	-0.5217	-0.47512	-0.41281	-0.38958	-0.4463
							243	-0.69242	-0.7354	-0.67756	-0.60656	-0.54224	-0.60175
							242	-0.95598	-0.99588	-0.92686	-0.85551	-0.74591	-0.80516
							241	-1.2612	-1.3018	-1.2134	-1.1486	-1.0001	-1.065
							240	-1.63	-1.6717	-1.5704	-1.5099	-1.3209	-1.3848
							239	-2.0828	-2.1183	-2.0064	-1.9579	-1.6964	-1.757
							238	-2.6021	-2.6289	-2.5159	-2.4743	-2.1282	-2.1795
							237	-3.2075	-3.214	-3.1086	-3.0864	-2.6167	-2.6549
							236	-3.8743	-3.8679	-3.7797	-3.763	-3.1801	-3.1937
							235	-4.633	-4.609	-4.5381	-4.5446	-3.8173	-3.8098
							234	-5.4556	-5.4401	-5.3519	-5.3926	-4.5024	-4.4679
							233	-6.339	-6.3303	-6.2345	-6.293	-5.2434	-5.1975
							232	-7.2363	-7.2288	-7.1404	-7.2074	-6.014	-5.9668
							231	-8.1353	-8.1492	-8.0704	-8.1326	-6.8185	-6.7655
							230	-9.0396	-9.0689	-8.9962	-9.0426	-7.6253	-7.5787
							229	-9.9386	-9.9771	-9.9066	-9.9279	-8.4154	-8.3725
							228	-10.799	-10.847	-10.79	-10.778	-9.1638	-9.1494
							227	-11.591	-11.641	-11.609	-11.543	-9.8398	-9.8715
							226	-12.292	-12.346	-12.33	-12.236	-10.467	-10.531
							225	-12.889	-12.939	-12.938	-12.833	-11.02	-11.097
							224	-13.355	-13.381	-13.394	-13.289	-11.469	-11.535
							223	-13.7	-13.697	-13.723	-13.627	-11.808	-11.853
							222	-13.918	-13.896	-13.937	-13.836	-12.024	-12.068
							221	-14.014	-13.979	-14.003	-13.938	-12.152	-12.192
							220	-13.96	-13.943	-13.961	-13.919	-12.182	-12.23
							219	-13.842	-13.828	-13.839	-13.84	-12.158	-12.201
							218	-13.655	-13.701	-13.692	-13.706	-12.064	-12.12
							217	-13.509	-13.634	-13.582	-13.607	-11.988	-12.064
							216	-13.422	-13.629	-13.522	-13.557	-11.94	-12.063
							215	-13.47	-13.695	-13.581	-13.617	-11.969	-12.13
							214	-13.672	-13.878	-13.749	-13.796	-12.101	-12.265
							213	-13.98	-14.16	-14.001	-14.05	-12.301	-12.424
							212	-14.352	-14.489	-14.266	-14.355	-12.54	-12.634
							211	-14.686	-14.788	-14.512	-14.682	-12.797	-12.848
							210	-14.972	-14.985	-14.743	-14.879	-13.013	-12.995
							209	-15.099	-15.019	-14.851	-14.911	-13.074	-12.976
							208	-14.96	-14.712	-14.707	-14.693	-12.919	-12.801
							207	-14.497	-13.967	-14.04	-14.071	-12.483	-12.285
							206	-13.255	-12.645	-12.725	-12.714	-11.366	-11.15
							205	-11.453	-10.937	-10.907	-10.818	-9.7345	-9.5402
							204	-9.2438	-8.9982	-8.7791	-8.5527	-7.7298	-7.6271
							203	-6.8518	-6.9536	-6.4981	-6.1309	-5.5673	-5.5924
							202	-4.42	-4.935	-4.2217	-3.7088	-3.3965	-3.563
							201	-2.1628	-3.0949	-2.1244	-1.4605	-1.3698	-1.6666
							200	-0.19731	-1.5802	-0.31051	0.48639	0.39911	0.0089215

## Sheet: Fig 3-fig sup3b PRL+2% PRL-GAL
									PRL+2% PRL-GAL
							Wavelength (nm)	Day 0	Day 2	Day 4	Day 6	Day 8	Day 10
							260	0	0	0	0	0	0
							259	0.04364	0.044103	0.00020555	0.014151	0.025252	0.044801
							258	0.081538	0.084383	0.0010502	0.015339	0.054146	0.079574
							257	0.10633	0.11224	-0.0035596	-0.0029128	0.078252	0.11288
							256	0.12012	0.12769	-0.0053707	-0.0077218	0.099581	0.13485
							255	0.13146	0.12975	-0.013547	-0.026639	0.11455	0.14953
							254	0.13484	0.11668	-0.024025	-0.082297	0.12254	0.15176
							253	0.12988	0.10388	-0.027087	-0.016967	0.12452	0.14134
							252	0.10779	0.07085	-0.026448	-0.079643	0.11425	0.11042
							251	0.069982	0.029638	-0.030298	-0.082113	0.083975	0.059843
							250	0.033309	-0.017485	-0.044514	-0.11492	0.06219	0.0092944
							249	-0.001703	-0.075272	-0.078193	-0.10997	0.027742	-0.053529
							248	-0.040624	-0.13273	-0.10213	-0.14296	-0.016398	-0.11997
							247	-0.098098	-0.19812	-0.13598	-0.1313	-0.076114	-0.18005
							246	-0.16962	-0.27228	-0.19928	-0.28456	-0.14129	-0.23979
							245	-0.26166	-0.36242	-0.28744	-0.37918	-0.2351	-0.30288
							244	-0.40636	-0.49655	-0.4075	-0.53959	-0.35892	-0.40734
							243	-0.60181	-0.67113	-0.58002	-0.62248	-0.52285	-0.53003
							242	-0.84817	-0.90402	-0.79488	-0.74694	-0.72706	-0.7043
							241	-1.1269	-1.1855	-1.0749	-1.0598	-0.96704	-0.91475
							240	-1.4672	-1.5407	-1.4062	-1.4873	-1.267	-1.1844
							239	-1.9075	-1.9808	-1.7929	-1.7994	-1.6385	-1.5367
							238	-2.428	-2.5039	-2.2223	-2.1988	-2.0813	-1.9731
							237	-3.0325	-3.1181	-2.7059	-2.6627	-2.5864	-2.4936
							236	-3.7173	-3.8028	-3.2642	-3.2321	-3.1406	-3.0903
							235	-4.4935	-4.5798	-3.8802	-3.9714	-3.795	-3.7738
							234	-5.3459	-5.4276	-4.5417	-4.5995	-4.5286	-4.5114
							233	-6.265	-6.3211	-5.2572	-5.2079	-5.3064	-5.3067
							232	-7.1972	-7.227	-6.0252	-5.8681	-6.1064	-6.1152
							231	-8.1356	-8.1288	-6.8316	-6.704	-6.9191	-6.9294
							230	-9.0699	-9.0339	-7.6468	-7.5432	-7.7362	-7.7363
							229	-9.9847	-9.9057	-8.4641	-8.5509	-8.5383	-8.5113
							228	-10.851	-10.751	-9.2513	-9.3373	-9.2912	-9.2739
							227	-11.614	-11.52	-9.9752	-10.124	-9.9772	-9.971
							226	-12.268	-12.213	-10.631	-10.705	-10.585	-10.596
							225	-12.827	-12.8	-11.181	-11.246	-11.099	-11.132
							224	-13.249	-13.263	-11.593	-11.606	-11.496	-11.542
							223	-13.565	-13.622	-11.878	-11.826	-11.787	-11.853
							222	-13.774	-13.86	-12.07	-12.075	-11.974	-12.064
							221	-13.88	-13.96	-12.176	-12.168	-12.079	-12.173
							220	-13.875	-13.922	-12.208	-12.395	-12.086	-12.175
							219	-13.808	-13.812	-12.164	-12.385	-12.034	-12.113
							218	-13.675	-13.66	-12.101	-12.218	-11.971	-11.981
							217	-13.56	-13.532	-12.053	-12.241	-11.947	-11.869
							216	-13.536	-13.488	-12.054	-12.182	-11.986	-11.816
							215	-13.667	-13.549	-12.141	-12.103	-12.101	-11.911
							214	-13.915	-13.736	-12.32	-12.1	-12.279	-12.122
							213	-14.223	-14.014	-12.557	-12.246	-12.55	-12.409
							212	-14.554	-14.321	-12.827	-12.444	-12.832	-12.723
							211	-14.889	-14.621	-13.025	-12.868	-13.049	-12.968
							210	-15.119	-14.837	-13.126	-13.041	-13.19	-13.174
							209	-15.23	-14.962	-13.014	-13.343	-13.193	-13.252
							208	-15.123	-14.842	-12.833	-13.167	-12.965	-13.119
							207	-14.583	-14.231	-12.197	-12.711	-12.4	-12.638
							206	-13.223	-13.004	-10.909	-11.65	-11.206	-11.493
							205	-11.249	-11.347	-9.1327	-10.205	-9.5652	-9.8536
							204	-8.8394	-9.3974	-7.0557	-8.2885	-7.6291	-7.8761
							203	-6.2375	-7.3297	-4.8413	-6.0266	-5.5587	-5.7614
							202	-3.6478	-5.2927	-2.6668	-3.5116	-3.4822	-3.6605
							201	-1.2393	-3.4231	-0.66822	-0.96634	-1.5528	-1.7351
							200	0.88553	-1.826	1.0452	1.6545	0.12132	-0.034097

[truncated: 1 more sheets: Fig 3-fig sup3b PRL+5% PRL-GAL]
