# Supplementary material for: Co-aggregation and secondary nucleation in the life cycle of human prolactin/galanin functional amyloids
Source: eLife. 2022 Mar 8;11:e73835. doi: 10.7554/eLife.73835 (PMC8993219; doi:10.7554/eLife.73835)
Supplement: Figure 3—figure supplement 5—source data 1. [file elife-73835-fig3-figsupp5-data1.xlsx]

## Sheet: Fig 3-fig sup 5
		1% PRL	2% PRL	5% PRL
	secondary nucleation	0.00546173	0.00506824	0.00373104		mean residual error OR Mean squared error
	elongation	0.0181676	0.0154773	0.00691655
