# Supplementary material for: Co-aggregation and secondary nucleation in the life cycle of human prolactin/galanin functional amyloids
Source: eLife. 2022 Mar 8;11:e73835. doi: 10.7554/eLife.73835 (PMC8993219; doi:10.7554/eLife.73835)
Supplement: Figure 3—source data 1. [file elife-73835-fig3-data1.xlsx]

## Sheet: Figure 3b
						PRL+5% PRL																PRL+2% PRL																PRL+1% PRL
						Set 1	Set 2	Set 3										AVG	STDEV	STDErr		Set 1	Set 2	Set 3										AVG	STDEV	STDErr		Set 1	Set 2	Set 3
					0	260.788	250.632	249.511		0	0	0		0	0	0		0	0	0		261.816	262.39	262.91		0	0	0		0	0	0		0	0	0		291.812	286.282	258.849		0	0	0		0	0	0
					1	264.413	263.528	263.384		3.625	12.896	13.873		0.00440986	0.0149855	0.0134123		0.0109359	0.00570617	0.00329455		262.937	263.857	263.769		1.121	1.467	0.859		0.00134049	0.00172745	0.00102695		0.00136496	0.000350891	0.000202593		207.84	308.392	273.111		-83.972	22.11	14.262		-0.0811834	0.0213758	0.0137884
					2	416.403	367.51	368.747		155.615	116.878	119.236		0.189308	0.135815	0.115276		0.1468	0.0382185	0.0220661		248.131	246.427	246.038		-13.685	-15.963	-16.872		-0.0163644	-0.018797	-0.0201707		-0.0184441	0.00192753	0.00111289		234.963	216.717	227.105		-56.849	-69.565	-31.744		-0.0549611	-0.0672549	-0.0306898
					3	534.929	546.303	522.735		274.141	295.671	273.224		0.333496	0.343577	0.264151		0.313741	0.0432413	0.0249661		303.684	373.517	365.403		41.868	111.127	102.493		0.0500655	0.130856	0.122532		0.101151	0.0444368	0.0256564		216.408	259.422	213.066		-75.404	-26.86	-45.783		-0.0729	-0.025968	-0.0442626
					4	702.729	681.117	724.917		441.941	430.485	475.406		0.537627	0.500234	0.459619		0.49916	0.0390152	0.0225261		489.93	524.159	493.095		228.114	261.769	230.185		0.272777	0.308243	0.275189		0.285403	0.0198163	0.0114413		294.867	208.943	258.108		3.055	-77.339	-0.741		0.00295355	-0.0747707	-0.000716393
					5	928.158	902.63	975.161		667.37	651.998	725.65		0.811864	0.757637	0.701552		0.757018	0.0551584	0.0318466		656.006	663.668	668.658		394.19	401.278	405.748		0.47137	0.47252	0.485078		0.476323	0.00760383	0.0043902		326.623	267.659	271.919		34.811	-18.623	13.07		0.033655	-0.0180046	0.012636
					6	1008.81	1100.5	992.938		748.022	849.868	743.427		0.909978	0.987566	0.718739		0.872094	0.13836	0.0798844		831.316	861.852	843.823		569.5	599.462	580.913		0.681005	0.705889	0.69449		0.693795	0.0124565	0.00719196		315.494	282.795	211.797		23.682	-3.487	-47.052		0.0228956	-0.0033712	-0.0454895
					7	1034.23	1068.4	1101.99		773.442	817.768	852.479		0.940902	0.950265	0.82417		0.905112	0.0702546	0.0405627		923.977	942.546	990.933		662.161	680.156	728.023		0.791809	0.800909	0.870362		0.821027	0.0429674	0.024808		331.222	258.11	220.559		39.41	-28.172	-38.29		0.0381013	-0.0272365	-0.0370185
					8	1183.8	1208.97	1202.18		923.012	958.338	952.669		1.12286	1.11361	0.921032		1.0525	0.113948	0.0657897		1014.57	1284.79	1130.11		752.754	1022.4	867.2		0.900139	1.20391	1.03675		1.04693	0.152143	0.0878426		268.852	318.776	263.769		-22.96	32.494	4.92		-0.0221975	0.0314149	0.00475662
					9	1191.4	1060.5	1061.51		930.612	809.868	811.999		1.1321	0.941085	0.785034		0.95274	0.173827	0.100362		1159.37	1153.15	1152.59		897.554	890.76	889.68		1.07329	1.0489	1.06363		1.06194	0.0122806	0.00709044		298.095	353.767	298.564		6.283	67.485	39.715		0.00607435	0.0652439	0.0383961
					10	1082.81	1111.2	1283.86		822.022	860.568	1034.35		1	1	1		1	7.85046e-17	4.5326e-17		1098.08	1111.62	1099.37		836.264	849.23	836.46		1	1	1		1	7.85046e-17	4.5326e-17		341.873	289.404	350.947		50.061	3.122	92.098		0.0483986	0.00301832	0.0890396
						PRL																5% PRL
						Set 1	Set 2	Set 3										AVG	STDEV	STDErr		Set 1	Set 2	Set 3										AVG	STDEV	STDErr
					0	230.329	266.757	297.624		0	0	0		0	0	0		0	0	0		285.967	299.548	267.794		0	0	0		0	0	0		0	0	0
					1	255.963	365.529	306.297		25.634	98.772	8.673		0.0247827	0.0954919	0.00838498		0.0428866	0.0462895	0.026726		210.306	314.716	298.488		-75.661	15.168	30.694		-0.0731484	0.0146643	0.0296747		-0.00960314	0.0555412	0.0320677
					2	312.023	280.354	316.833		81.694	13.597	19.209		0.0789811	0.0131455	0.0185711		0.0368992	0.0365448	0.0210998		268.839	284.91	335.559		-17.128	-14.638	67.765		-0.0165592	-0.0141519	0.0655146		0.0116012	0.0467059	0.0269665
					3	327.177	308.241	226.301		96.848	41.484	-71.323		0.0936318	0.0401064	-0.0689545		0.0215946	0.0828589	0.04784		224.926	260.196	307.307		-61.041	-39.352	39.513		-0.0590139	-0.0380452	0.0382008		-0.0196194	0.0511596	0.0295379
					4	283.317	269.68	299.521		52.988	2.923	1.897		0.0512284	0.00282593	0.001834		0.0186294	0.0282359	0.0163025		260.65	275.902	250.266		-25.317	-23.646	-17.528		-0.0244763	-0.0228608	-0.0169459		-0.0214276	0.00396445	0.00228894
					5	237.634	245.927	280.242		7.305	-20.83	-17.382		0.00706241	-0.0201383	-0.0168048		-0.00996021	0.0148359	0.00856579		300.663	223.266	317.1		14.696	-76.282	49.306		0.014208	-0.0737488	0.0476686		-0.0039574	0.0627139	0.036209
					6	234.962	232.751	323.402		4.633	-34.006	25.778		0.00447915	-0.0328767	0.024922		-0.00115854	0.0293089	0.016922		247.468	275.29	292.652		-38.499	-24.258	24.858		-0.0372205	-0.0234524	0.0240325		-0.0122135	0.0321359	0.0185542
					7	280.619	213.541	233.966		50.29	-53.216	-63.658		0.04862	-0.0514488	-0.061544		-0.0214576	0.0608985	0.0351608		271.438	263.385	218.108		-14.529	-36.163	-49.686		-0.0140465	-0.0349621	-0.048036		-0.0323482	0.0171448	0.00989887
					8	235.874	330.927	247.031		5.545	64.17	-50.593		0.00536086	0.062039	-0.0489129		0.00616233	0.0554803	0.0320325		294.718	271.658	212.934		8.751	-27.89	-54.86		0.00846039	-0.0269638	-0.0530382		-0.0238472	0.0308675	0.0178219
					9	280.619	247.468	340.815		50.29	-19.289	43.191		0.04862	-0.0186484	0.0417567		0.0239094	0.0370156	0.0213716		322.623	246.427	294.678		36.656	-53.121	26.884		0.0354387	-0.0513569	0.0259912		0.00335767	0.0476191	0.0274937
					10	287.01	278.115	243.55		56.681	11.358	-54.074		0.0547987	0.0109808	-0.0522783		0.00450042	0.0538319	0.0310807		241.424	238.819	316.469		-44.543	-60.729	48.675		-0.0430638	-0.0587123	0.0470586		-0.0182392	0.0570882	0.0329609
					0
					1
					2
					3
					4
					5
					6
					7
					8
					9
					10
					0
					1
					2
					3
					4
					5
					6
					7
					8
					9
					10
[truncated: 3 more columns]

## Sheet: Figure 3c
					GAL+5% GAL																GAL+2% GAL																GAL+1% GAL
					Set 1	Set 2	Set 3										AVG	STDEV	STDErr		Set 1	Set 2	Set 3										AVG	STDEV	STDErr		Set 1	Set 2	Set 3										AVG
					258.931	260.115	261.282		0	0	0		0	0	0		0	0	0		262.878	263.388	263.696		0	0	0		0	0	0		0	0	0		219.709	221.593	248.073		0	0	0		0	0	0		0
					530.085	450.157	486.725		271.154	190.042	225.443		0.324876	0.204832	0.280794		0.270167	0.0607234	0.0350597		264.101	264.463	264.66		1.223	1.075	0.964		0.00139335	0.0011734	0.00102435		0.00119703	0.00018563	0.000107177		270.583	267.399	208.75		50.874	45.806	-39.323		0.0491846	0.0442849	-0.0380171		0.0184841
					625.812	789.281	735.982		366.881	529.166	474.7		0.439568	0.570348	0.591248		0.533721	0.0822058	0.0474629		433.447	383.458	423.741		170.569	120.07	160.045		0.194327	0.13106	0.170065		0.165151	0.0319182	0.0184285		310.019	292.97	214.797		90.31	71.377	-33.276		0.087311	0.0690067	-0.032171		0.0413822
					819.988	750.835	865.107		561.057	490.72	603.825		0.672215	0.52891	0.752076		0.651067	0.113076	0.0652863		623.004	614.727	500.763		360.126	351.339	237.067		0.410287	0.383498	0.251908		0.348565	0.0847715	0.0489443		296.851	238.014	273.575		77.142	16.421	25.502		0.0745802	0.0158757	0.0246551		0.0383704
					985.43	801.768	937.15		726.499	541.653	675.868		0.870435	0.583807	0.841807		0.765349	0.157871	0.0911495		811.481	779.767	743.561		548.603	516.379	479.865		0.625016	0.563645	0.509907		0.566189	0.0575969	0.0332546		273.08	320.817	232.179		53.371	99.224	-15.894		0.0515986	0.0959289	-0.0153662		0.0440538
					1101.29	1133.81	972.401		842.359	873.695	711.119		1.00925	0.94169	0.885712		0.945551	0.061859	0.0357153		930.601	927.914	940.237		667.723	664.526	676.541		0.760728	0.725353	0.718895		0.734992	0.0225207	0.0130027		220.37	295.924	208.162		0.661	74.331	-39.911		0.000639049	0.0718626	-0.0385856		0.0113053
					1173.96	1188.76	993.717		915.029	928.645	732.435		1.09632	1.00092	0.912262		1.00317	0.0920482	0.0531456		1203.92	999.226	1187.88		941.042	735.838	924.184		1.07212	0.803192	0.982042		0.95245	0.136883	0.0790316		227.904	280.57	190.402		8.195	58.977	-57.671		0.00792286	0.0570185	-0.0557558		0.00306183
					1009.97	1197.04	1186.79		751.039	936.925	925.508		0.899837	1.00984	1.15274		1.02081	0.126807	0.073214		1195.8	1019.76	1022.95		932.922	756.372	759.254		1.06287	0.825606	0.806787		0.898419	0.142725	0.0824049		209.107	299.786	245.151		-10.602	78.193	-2.922		-0.0102499	0.0755963	-0.00282497		0.0208405
					1249.52	994.558	1030.44		990.589	734.443	769.158		1.18685	0.791601	0.958001		0.978816	0.198444	0.114575		935.863	1009.29	1232.68		672.985	745.902	968.984		0.766723	0.814177	1.02965		0.870182	0.140124	0.0809028		246.038	335.955	323.512		26.329	114.362	75.439		0.0254547	0.110564	0.0729338		0.0696509
					1097.08	1076.8	1177.23		838.149	816.685	915.948		1.00421	0.880243	1.14083		1.00843	0.130345	0.0752571		1185.73	1069.67	1084.61		922.852	806.282	820.914		1.05139	0.880084	0.872307		0.934595	0.101225	0.0584441		264.621	292.568	314.732		44.912	70.975	66.659		0.0434205	0.068618	0.0644454		0.058828
					1093.57	1187.91	1064.16		834.639	927.795	802.878		1	1	1		1	2.35514e-16	1.35978e-16		1140.62	1179.53	1204.78		877.742	916.142	941.084		1	1	1		1	0	0		274.657	286.774	265.225		54.948	65.181	17.152		0.0531233	0.0630164	0.0165824		0.0442407
					GAL																5% GAL
					Set 1	Set 2	Set 3										AVG	STDEV	STDErr		Set 1	Set 2	Set 3										AVG	STDEV	STDErr
					263.262	229.735	260.44		0	0	0		0	0	0		0	0	0		224.247	247.11	258.346		0	0	0		0	0	0		0	0	0
					282.33	297.113	270.14		19.068	67.378	9.7		0.0184348	0.0651405	0.00937788		0.0309844	0.0299247	0.0172775		326.046	314.139	246.923		101.799	67.029	-11.423		0.0984184	0.0648031	-0.0110437		0.0507259	0.0560724	0.0323744
					262.067	283.545	242.984		-1.195	53.81	-17.456		-0.00115532	0.0520231	-0.0168763		0.0113305	0.0361068	0.0208469		289.211	279.125	311.131		64.964	32.015	52.785		0.0628067	0.0309518	0.0510321		0.0482635	0.0161069	0.00929958
					262.997	260.55	232.875		-0.265	30.815	-27.565		-0.0002562	0.0297917	-0.0266496		0.000961958	0.0282404	0.0163051		252.187	422.542	303.244		27.94	175.432	44.898		0.0270122	0.169606	0.043407		0.0800085	0.0780257	0.0450495
					211.039	249.207	248.034		-52.223	19.472	-12.406		-0.0504888	0.0188254	-0.011994		-0.0145525	0.0347278	0.0200507		211.836	276.78	264.755		-12.411	29.67	6.409		-0.0119989	0.0286847	0.00619617		0.00762734	0.0203795	0.0117665
					285.733	300.544	281.305		22.471	70.809	20.865		0.0217248	0.0684576	0.0201721		0.0367848	0.0274404	0.0158432		306.37	267.649	242.184		82.123	20.539	-16.162		0.0793958	0.0198569	-0.0156253		0.0278758	0.0480154	0.0277225
					262.741	302.381	216.975		-0.521	72.646	-43.465		-0.000503698	0.0702335	-0.0420216		0.00923608	0.0567578	0.0327701		247.947	241.291	248.572		23.7	-5.819	-9.774		0.022913	-0.00562576	-0.00944942		0.00261259	0.0176843	0.0102103
					214.147	269.928	236.387		-49.115	40.193	-24.053		-0.047484	0.0388583	-0.0232542		-0.0106267	0.0445347	0.0257129		211.061	299.085	237.619		-13.186	51.975	-20.727		-0.0127481	0.050249	-0.0200387		0.00582073	0.0386483	0.0223143
					291.556	283.912	305.228		28.294	54.177	44.788		0.0273544	0.0523779	0.0433007		0.041011	0.0126679	0.00731403		218.207	248.611	272.573		-6.04	1.501	14.227		-0.00583942	0.00145115	0.0137545		0.00312209	0.00990328	0.00571783
					319.448	313.781	323.41		56.186	84.046	62.97		0.0543202	0.081255	0.0608789		0.0654847	0.0140457	0.00810951		263.857	334.454	303.684		39.61	87.344	45.338		0.0382946	0.0844435	0.0438324		0.0555235	0.025198	0.0145485
					237.805	382.416	324.708		-25.457	152.681	64.268		-0.0246116	0.147611	0.0621338		0.061711	0.0861119	0.0497182		296.937	326.527	305.474		72.69	79.417	47.128		0.0702761	0.0767797	0.045563		0.0642062	0.0164698	0.00950911
[truncated: 2 more columns]

## Sheet: Figure 3d right panel
						ThT 480 nm			PRL+1% GAL												PRL+1% GAL					PRL+2% GAL												PRL+2% GAL					PRL+5% GAL
								Time (d)					Normalized to 0				div by highest				Avg	StdDev	StdErr		Time (d)					Normalized to 0				div by highest				Avg	StdDev	StdErr		Time (d)					Normalized to 0
								0	232.572	283.14	224.837		0	0	0		0	0	0		0	0	0		0	219.583	273.862	270.01		0	0	0		0	0	0		0	0	0		0	266.799	283.234	217.781		0	0	0
								1	210.145	228.673	267.947		-22.427	-54.467	43.11		-0.0174558	-0.0423937	0.0335541		-0.00876512	0.0387126	0.0223514		1	283.197	296.333	275.735		63.614	22.471	5.725		0.0495132	0.01749	0.00445598		0.0238197	0.0231859	0.0133868		1	273.1	286.169	384.737		6.301	2.935	166.956
								2	199.421	250.999	301.073		-33.151	-32.141	76.236		-0.0258027	-0.0250165	0.0593373		0.00283937	0.0489302	0.0282507		2	291.51	284.306	292.541		71.927	10.444	22.531		0.0559835	0.00812895	0.0175367		0.0272164	0.0253532	0.0146381		2
								3	282.319	297.454	278.754		49.747	14.314	53.917		0.0387199	0.0111411	0.0419656		0.0306089	0.0169375	0.00977916		3	233.683	145.798	276.986		14.1	-128.064	6.976		0.0109746	-0.099677	0.00542968		-0.0277576	0.0623457	0.0359964		3	294.834	149.897	279.179		28.035	-133.337	61.398
								4	274.937	232.802	144.496		42.365	-50.338	-80.341		0.0329743	-0.0391799	-0.0625324		-0.0229127	0.049788	0.028746		4	280.337	272.418	298.32		60.754	-1.444	28.31		0.0472871	-0.00112392	0.0220347		0.0227326	0.0242131	0.0139798		4	128.499	296.447	275.724		-138.3	13.213	57.943
								5	229.538	122.794	273.519		-3.034	-160.346	48.682		-0.00236148	-0.124803	0.037891		-0.0297579	0.0847365	0.0489241		5	213.452	211.341	232.375		-6.131	-62.521	-37.635		-0.00477199	-0.0486624	-0.0292927		-0.0275757	0.0219955	0.0126995		5	278.775	312.383	291.612		11.976	29.149	73.831
								6	289.614	355.135	379.024		57.042	71.995	154.187		0.0443979	0.0560364	0.120009		0.0734813	0.0407127	0.0235062		6	194.26	227.305	287.897		-25.323	-46.557	17.887		-0.0197098	-0.0362371	0.0139221		-0.0140083	0.025561	0.0147581		6	222.924	199.37	354.491		-43.875	-83.864	136.71
								7	246.994	223.823	262.521		14.422	-59.317	37.684		0.0112252	-0.0461686	0.0293309		-0.00187086	0.0394167	0.0227579		7	275.019	290.186	246.684		55.436	16.324	-23.326		0.0431479	0.0127056	-0.0181555		0.012566	0.0306519	0.0176974		7	287.284	343.943	291.095		20.485	60.709	73.314
								8	209.36	348.116	387.401		-23.212	64.976	162.564		-0.0180668	0.0505732	0.12653		0.053012	0.072329	0.0417604		8	346.285	207.292	336.773		126.702	-66.57	66.763		0.0986169	-0.0518139	0.0519641		0.0329224	0.0770019	0.0444584		8	188.179	185.683	387.401		-78.62	-97.551	169.62
								9	206.309	338.154	364.223		-26.263	55.014	139.386		-0.0204415	0.0428194	0.108489		0.0436224	0.0644691	0.0372224		9	361.628	274.151	261.898		142.045	0.289	-8.112		0.110559	0.000224939	-0.00631387		0.0348233	0.0656704	0.0379159		9	258.561	362.988	395.794		-8.238	79.754	178.013
								10	257.241	212.068	207.47		24.669	-71.072	-17.367		0.0192008	-0.055318	-0.0135174		-0.0165449	0.0373515	0.0215655		10	288.492	394.534	332.075		68.909	120.672	62.065		0.0536344	0.0939235	0.0483075		0.0652885	0.0249413	0.0144003		10	322.211	255.674	214.604		55.412	-27.56	-3.177

## Sheet: Figure 3e
						Lag time (hrs)
						homo seeding
						PRL+5% PRL		Set 1	Set 2	Set 3		Mean	Stdev	StdErr
																		GAL+5% GAL		Set 1	Set 2	Set 3		p value
								61.2	65.76	74.448		67.136	6.73033	3.88587						24.48	27.6	13.44
																								0.02	*
						PRL+2% PRL		Set 1	Set 2	Set 3
												Mean	Stdev	StdErr
								100.872	80.496	95.928		92.432	10.6284	6.13646
																		GAL+5% PRL		Set 1	Set 2	Set 3
						GAL+5% GAL		Set 1	Set 2	Set 3										5.23	6.35	5.82
												Mean	Stdev	StdErr
								24.48	27.6	13.44		21.84	7.44	4.29561
																		GAL+2% GAL		Set 1	Set 2	Set 3
						GAL+2% GAL		Set 1	Set 2	Set 3
												Mean	Stdev	StdErr						60.48	41.76	38.56		0.0067	**
								60.48	41.76	38.56		46.9333	11.8404	6.83624
						hetero seeding														Set 1	Set 2	Set 3
							Set 1	Set 2	Set 3		Mean	Stdev	Stderr					GAL+2% PRL		8.83	13.23	11.28
						GAL+1% PRL	21.58	23.23	16.96		20.59	3.25012	1.87651
						GAL+2% PRL	8.83	13.23	11.28		11.1133	2.20473	1.27294
						GAL+5% PRL	5.23	6.35	5.82		5.8	0.560268	0.32348

## Sheet: Figure 3g
															1			2			3
						GAL + 5% GAL			GAL+Hep			GAL+5% PRL			GAL+5% GAL			GAL+Hep			GAL+5% PRL
						Fibril Diameter	Frequency		Fibril Diameter	Freq		Fibril Diameter	Freq		Mean	SD		Mean	SD		Mean	SD
						0	0		7.1	1		1.4	1		12	3.162		11.2	1.14		12.35	4.806
						2	2		7.2	1		1.5	0
						4	11		7.3	1		1.6	0
						6	19		7.4	0		1.7	0
						8	18		7.5	0		1.8	0
						10	25		7.6	1		1.9	0			1 to 2		2 to 3
						12	25		7.7	0		2	0
						14	25		7.8	0		2.1	0			NS		NS
						16	15		7.9	3		2.2	0
						18	21		8	1		2.3	0		p value	0.254		0.139
						20	14		8.1	6		2.4	0
						22	2		8.2	3		2.5	0
						24	6		8.3	4		2.6	0
						26	1		8.4	4		2.7	0
						28	1		8.5	6		2.8	0
						30	1		8.6	9		2.9	0
						32	1		8.7	8		3	0
									8.8	8		3.1	0
									8.9	8		3.2	0
									9	12		3.3	0
									9.1	11		3.4	0
									9.2	18		3.5	0
									9.3	13		3.6	0
									9.4	27		3.7	0
									9.5	19		3.8	0
									9.6	20		3.9	0
									9.7	23		4	0
									9.8	21		4.1	0
									9.9	23		4.2	0
									10	23		4.3	0
									10.1	18		4.4	0
									10.2	8		4.5	0
									10.3	23		4.6	0
									10.4	13		4.7	1
									10.5	17		4.8	1
									10.6	11		4.9	1
									10.7	21		5	1
									10.8	15		5.1	0
									10.9	8		5.2	0
									11	15		5.3	1
									11.1	14		5.4	0
									11.2	3		5.5	2
									11.3	7		5.6	1
									11.4	7		5.7	1
									11.5	8		5.8	2
									11.6	9		5.9	1
									11.7	5		6	1
									11.8	7		6.1	4
									11.9	4		6.2	1
									12	3		6.3	0
									12.1	3		6.4	0
									12.2	3		6.5	1
									12.3	2		6.6	2
									12.4	0		6.7	0
									12.5	0		6.8	3
									12.6	1		6.9	0
									12.7	0		7	2
									12.8	0		7.1	2
									12.9	0		7.2	4
									13	0		7.3	0
									13.1	1		7.4	4
												7.5	5
												7.6	2
												7.7	5
												7.8	3
												7.9	5
												8	1
												8.1	2
												8.2	0
												8.3	4
												8.4	2
												8.5	4
												8.6	3
												8.7	4
												8.8	4
												8.9	2
												9	6
												9.1	6
												9.2	2
												9.3	2
												9.4	5
												9.5	2
												9.6	4
												9.7	6
												9.8	7
												9.9	3
												10	4
												10.1	6
												10.2	3
												10.3	3
												10.4	6
												10.5	2
												10.6	4
												10.7	8
												10.8	4
												10.9	7
												11	4
												11.1	6
												11.2	6
												11.3	13
												11.4	11
												11.5	6
												11.6	7
												11.7	5
												11.8	7
												11.9	9
												12	6
												12.1	7
												12.2	7
												12.3	6
												12.4	3
												12.5	8
												12.6	3
												12.7	9
												12.8	8
												12.9	10
												13	5
												13.1	4
												13.2	5
												13.3	7
												13.4	6
												13.5	9
												13.6	6
												13.7	4
												13.8	2
												13.9	6
												14	5
												14.1	10
												14.2	4
												14.3	6
												14.4	6
												14.5	8
												14.6	6
												14.7	3
												14.8	3
												14.9	5
												15	4
												15.1	1
												15.2	4
												15.3	3
												15.4	4
												15.5	3
												15.6	5
												15.7	5
												15.8	1
												15.9	6
												16	1
												16.1	2
												16.2	3
												16.3	4
												16.4	1
												16.5	0
												16.6	0
												16.7	2
												16.8	1
												16.9	2
												17	3
												17.1	0
												17.2	4
												17.3	2
												17.4	0
												17.5	0
												17.6	1
												17.7	0
												17.8	0
												17.9	1
												18	1
												18.1	0
												18.2	2
												18.3	1
												18.4	1
												18.5	0
												18.6	1
												18.7	0
												18.8	1
												18.9	1
												19	1
												19.1	0
												19.2	0
												19.3	1
												19.4	0
												19.5	0
												19.6	1
												19.7	0
												19.8	0
												19.9	0
												20	1
												20.1	0
												20.2	0
												20.3	0
												20.4	0
												20.5	0
												20.6	1

## Sheet: Figure 3h left panel
										GAL+5% GAL
								Wavelength (nm)
								1699.2	0.00071	0.00016	0.00014	0.00021	6e-05	0.00013
								1697.3	0.00093	0.00017	0.00015	0.00024	7e-05	0.00029
								1695.3	0.00147	0.00018	0.00017	0.00027	9e-05	0.00077
								1693.4	0.00172	0.00019	0.00018	0.0003	0.00011	0.00093
								1691.5	0.00125	0.0002	0.00019	0.00034	0.00014	0.00037
								1689.6	0.00117	0.00021	0.00021	0.0004	0.00019	0.00016
								1687.6	0.00127	0.00023	0.00023	0.00046	0.00027	9e-05
								1685.7	0.00147	0.00024	0.00025	0.00054	0.00038	5e-05
								1683.8	0.0018	0.00026	0.00028	0.00064	0.00058	4e-05
								1681.8	0.00229	0.00028	0.00031	0.00077	0.0009	3e-05
								1679.9	0.00292	0.0003	0.00034	0.00094	0.00132	2e-05
								1678	0.00336	0.00032	0.00038	0.00117	0.00147	1e-05
								1676	0.00341	0.00035	0.00043	0.00147	0.00114	1e-05
								1674.1	0.0035	0.00038	0.00049	0.00187	0.00075	1e-05
								1672.2	0.00386	0.00041	0.00056	0.0024	0.00048	1e-05
								1670.3	0.00445	0.00045	0.00064	0.00303	0.00033	1e-05
								1668.3	0.00515	0.00049	0.00074	0.00368	0.00023	1e-05
								1666.4	0.00571	0.00054	0.00087	0.00412	0.00017	1e-05
								1664.5	0.00588	0.0006	0.00103	0.00412	0.00013	0
								1662.5	0.00567	0.00066	0.00123	0.00367	0.0001	0
								1660.6	0.00534	0.00074	0.00149	0.00302	8e-05	0
								1658.7	0.00512	0.00083	0.00184	0.00239	7e-05	0
								1656.8	0.00514	0.00093	0.00229	0.00187	6e-05	0
								1654.8	0.00544	0.00105	0.00287	0.00147	5e-05	0
								1652.9	0.00601	0.0012	0.0036	0.00117	4e-05	0
								1651	0.00679	0.00138	0.00444	0.00094	4e-05	0
								1649	0.00763	0.00159	0.00523	0.00077	3e-05	0
								1647.1	0.00824	0.00185	0.00571	0.00064	3e-05	0
								1645.2	0.00838	0.00217	0.00564	0.00054	2e-05	0
								1643.3	0.0081	0.00255	0.00507	0.00046	2e-05	0
								1641.3	0.00765	0.003	0.00424	0.0004	2e-05	0
								1639.4	0.0073	0.00352	0.00342	0.00034	2e-05	0
								1637.5	0.00714	0.00409	0.00272	0.0003	2e-05	0
								1635.5	0.00713	0.00467	0.00217	0.00027	1e-05	0
								1633.6	0.00718	0.00518	0.00175	0.00024	1e-05	0
								1631.7	0.00715	0.00549	0.00143	0.00021	1e-05	0
								1629.8	0.00692	0.00554	0.00118	0.00019	1e-05	0
								1627.8	0.00647	0.0053	0.00099	0.00017	1e-05	0
								1625.9	0.00585	0.00485	0.00084	0.00016	1e-05	0
								1624	0.00515	0.00428	0.00071	0.00014	1e-05	0
								1622	0.00446	0.0037	0.00062	0.00013	1e-05	0
								1620.1	0.00382	0.00316	0.00054	0.00012	1e-05	0
								1618.2	0.00328	0.00268	0.00047	0.00011	1e-05	0
								1616.3	0.00281	0.00228	0.00042	0.0001	1e-05	0
								1614.3	0.00242	0.00195	0.00037	0.0001	1e-05	0
								1612.4	0.0021	0.00167	0.00033	9e-05	1e-05	0
								1610.5	0.00183	0.00144	0.0003	8e-05	1e-05	0
								1608.5	0.00161	0.00126	0.00027	8e-05	1e-05	0
								1606.6	0.00142	0.0011	0.00025	7e-05	1e-05	0
								1604.7	0.00127	0.00097	0.00023	7e-05	1e-05	0
								1602.8	0.00113	0.00086	0.00021	6e-05	0	0
								1600.8	0.00102	0.00076	0.00019	6e-05	0	0

## Sheet: Figure 3h right panel
									GAL+5% PRL
							Wavelength (nm)
							1699.2	0.00073	0.00034	0.00022	0.00011	4e-05
							1697.3	0.00082	0.00036	0.00024	0.00012	5e-05
							1695.3	0.00092	0.00038	0.00026	0.00014	6e-05
							1693.4	0.00096	0.0004	0.00028	0.00016	8e-05
							1691.5	0.00104	0.00042	0.00031	0.00019	0.0001
							1689.6	0.00116	0.00045	0.00034	0.00022	0.00014
							1687.6	0.00132	0.00048	0.00037	0.00026	0.00021
							1685.7	0.00157	0.00051	0.00041	0.00032	0.00033
							1683.8	0.00197	0.00054	0.00045	0.00039	0.00058
							1681.8	0.00269	0.00058	0.0005	0.00049	0.00112
							1679.9	0.00371	0.00062	0.00056	0.00064	0.00189
							1678	0.00375	0.00067	0.00063	0.00085	0.0016
							1676	0.00343	0.00072	0.00071	0.00116	0.00085
							1674.1	0.00367	0.00078	0.00081	0.00163	0.00045
							1672.2	0.00437	0.00084	0.00093	0.00232	0.00027
							1670.3	0.00535	0.00092	0.00108	0.00317	0.00018
							1668.3	0.00613	0.001	0.00127	0.00374	0.00012
							1666.4	0.00618	0.00109	0.00151	0.00348	9e-05
							1664.5	0.00576	0.0012	0.00181	0.00267	7e-05
							1662.5	0.00548	0.00132	0.00221	0.00189	6e-05
							1660.6	0.00558	0.00147	0.00274	0.00133	4e-05
							1658.7	0.00607	0.00163	0.00344	0.00096	4e-05
							1656.8	0.00695	0.00182	0.00438	0.00071	3e-05
							1654.8	0.00823	0.00204	0.00561	0.00055	3e-05
							1652.9	0.00987	0.00231	0.00711	0.00043	2e-05
							1651	0.01167	0.00262	0.00868	0.00035	2e-05
							1649	0.01308	0.00298	0.00979	0.00029	2e-05
							1647.1	0.01354	0.00342	0.00987	0.00024	2e-05
							1645.2	0.01301	0.00394	0.00885	0.0002	1e-05
							1643.3	0.01204	0.00455	0.00731	0.00017	1e-05
							1641.3	0.0112	0.00526	0.00578	0.00015	1e-05
							1639.4	0.01073	0.00608	0.00451	0.00013	1e-05
							1637.5	0.01064	0.00697	0.00354	0.00012	1e-05
							1635.5	0.01082	0.0079	0.00281	0.0001	1e-05
							1633.6	0.01113	0.00877	0.00227	9e-05	1e-05
							1631.7	0.01139	0.00945	0.00186	8e-05	1e-05
							1629.8	0.01143	0.00981	0.00154	7e-05	1e-05
							1627.8	0.01114	0.00977	0.0013	7e-05	1e-05
							1625.9	0.01051	0.00934	0.0011	6e-05	1e-05
							1624	0.00962	0.00861	0.00095	6e-05	1e-05
							1622	0.0086	0.00772	0.00082	5e-05	0
							1620.1	0.00757	0.00679	0.00072	5e-05	0
							1618.2	0.00659	0.00591	0.00064	4e-05	0
							1616.3	0.00572	0.00511	0.00057	4e-05	0
							1614.3	0.00497	0.00442	0.00051	4e-05	0
							1612.4	0.00432	0.00383	0.00046	4e-05	0
							1610.5	0.00378	0.00333	0.00041	3e-05	0
							1608.5	0.00331	0.00291	0.00037	3e-05	0
							1606.6	0.00292	0.00255	0.00034	3e-05	0
							1604.7	0.00259	0.00225	0.00031	3e-05	0
							1602.8	0.00231	0.002	0.00029	3e-05	0
							1600.8	0.00207	0.00178	0.00026	2e-05	0
