# Supplementary material for: Co-aggregation and secondary nucleation in the life cycle of human prolactin/galanin functional amyloids
Source: eLife. 2022 Mar 8;11:e73835. doi: 10.7554/eLife.73835 (PMC8993219; doi:10.7554/eLife.73835)
Supplement: Figure 4—figure supplement 1—source data 1. [file elife-73835-fig4-figsupp1-data1.xlsx]

## Sheet: Fig 4-fig sup 1
		CD	Day 0						Day 15
		Wavelength (nm)	GH	ACTH	GH-GAL	PRL-ACTH		Wavelength (nm)	GH	ACTH	GH-GAL	PRL-ACTH
		260	0	0	0	0		260	0	0	0	0
		259	-0.02266	-0.00360448	-0.0136914	-0.0126059		259	-0.00430377	-0.0350029	0.00821842	-0.0311608
		258	-0.0642104	-0.0429645	-0.0364144	-0.0235057		258	-0.0154641	-0.119757	0.0125965	-0.0543245
		257	-0.1207	-0.0808166	-0.0552413	-0.0373923		257	-0.0290349	-0.193882	0.0277609	-0.0857817
		256	-0.17907	-0.117402	-0.0730008	-0.0538793		256	-0.045672	-0.265946	0.031726	-0.112581
		255	-0.226612	-0.101504	-0.086785	-0.0748958		255	-0.0621999	-0.291727	0.0311697	-0.135677
		254	-0.234252	-0.0802995	-0.102975	-0.0961193		254	-0.0785028	-0.276836	0.0225539	-0.174617
		253	-0.223896	-0.0746624	-0.127435	-0.114634		253	-0.0969527	-0.26167	0.000591513	-0.207364
		252	-0.199272	-0.129339	-0.157881	-0.13585		252	-0.118374	-0.292365	-0.0194953	-0.222898
		251	-0.187245	-0.177016	-0.187681	-0.157028		251	-0.136647	-0.327872	-0.0435706	-0.232476
		250	-0.213109	-0.212759	-0.219664	-0.180307		250	-0.158871	-0.347791	-0.0809845	-0.251007
		249	-0.274661	-0.203743	-0.251625	-0.211692		249	-0.194319	-0.324997	-0.138916	-0.287341
		248	-0.375424	-0.165015	-0.294639	-0.256002		248	-0.245629	-0.287677	-0.206055	-0.343295
		247	-0.479582	-0.0968371	-0.355492	-0.321914		247	-0.319973	-0.247017	-0.278771	-0.408043
		246	-0.575533	-0.0344115	-0.444853	-0.430651		246	-0.419853	-0.254031	-0.368375	-0.476352
		245	-0.668185	0.0422682	-0.575155	-0.578769		245	-0.557025	-0.225859	-0.494286	-0.581431
		244	-0.794364	0.0976563	-0.757415	-0.779119		244	-0.722921	-0.218662	-0.657855	-0.715981
		243	-0.980855	0.150848	-1.00968	-1.04275		243	-0.935986	-0.167882	-0.857123	-0.910536
		242	-1.2594	0.206349	-1.31105	-1.3659		242	-1.21651	-0.109192	-1.08958	-1.16612
		241	-1.63236	0.248763	-1.70116	-1.7613		241	-1.54235	-0.0780646	-1.36657	-1.46717
		240	-2.12024	0.242212	-2.1915	-2.23639		240	-1.93511	-0.102088	-1.73436	-1.80522
		239	-2.70737	0.214541	-2.78135	-2.80443		239	-2.39954	-0.155899	-2.16306	-2.20042
		238	-3.38193	0.170744	-3.46721	-3.45737		238	-2.95969	-0.230894	-2.67834	-2.6807
		237	-4.16679	0.126277	-4.24316	-4.20604		237	-3.60602	-0.356168	-3.27316	-3.22812
		236	-5.07272	0.0288768	-5.11485	-5.03464		236	-4.33196	-0.499809	-3.95077	-3.85123
		235	-6.05588	-0.0537114	-6.06294	-5.93944		235	-5.13003	-0.650665	-4.70616	-4.53524
		234	-7.11391	-0.156851	-7.08765	-6.89944		234	-5.99038	-0.787072	-5.54487	-5.31051
		233	-8.21734	-0.263875	-8.16503	-7.90949		233	-6.90589	-0.903698	-6.43496	-6.14721
		232	-9.37212	-0.395858	-9.26788	-8.93504		232	-7.85273	-1.02432	-7.36109	-7.03251
		231	-10.5674	-0.547425	-10.3692	-9.96334		231	-8.80809	-1.13437	-8.29852	-7.94571
		230	-11.7572	-0.66622	-11.4482	-10.9688		230	-9.75865	-1.19634	-9.23647	-8.83241
		229	-12.9268	-0.783693	-12.4736	-11.9109		229	-10.6789	-1.24636	-10.1495	-9.69146
		228	-14.0321	-0.90773	-13.4236	-12.7797		228	-11.5405	-1.32197	-10.9926	-10.4807
		227	-14.9983	-0.970537	-14.2672	-13.546		227	-12.315	-1.36441	-11.7362	-11.1989
		226	-15.8035	-1.02992	-14.9653	-14.2068		226	-12.9972	-1.37992	-12.3774	-11.8301
		225	-16.44	-1.03181	-15.5325	-14.7454		225	-13.5808	-1.37901	-12.9031	-12.3268
		224	-16.9181	-0.992676	-15.9418	-15.1702		224	-14.0303	-1.33092	-13.3301	-12.7056
		223	-17.2826	-0.950226	-16.2191	-15.4587		223	-14.3731	-1.26744	-13.6176	-12.9682
		222	-17.4856	-0.909007	-16.3453	-15.6343		222	-14.5761	-1.16817	-13.793	-13.1674
		221	-17.5376	-0.924987	-16.349	-15.7094		221	-14.6596	-1.08104	-13.8738	-13.2499
		220	-17.4935	-0.987942	-16.2431	-15.6986		220	-14.6501	-0.991158	-13.8739	-13.2399
		219	-17.3992	-1.07541	-16.0565	-15.6499		219	-14.5916	-0.910871	-13.8059	-13.1543
		218	-17.2902	-1.16734	-15.8329	-15.5751		218	-14.5209	-0.861112	-13.6959	-13.0052
		217	-17.1967	-1.27428	-15.614	-15.5103		217	-14.4631	-0.85236	-13.5755	-12.8609
		216	-17.1027	-1.41778	-15.4164	-15.4424		216	-14.4543	-0.917307	-13.479	-12.7551
		215	-17.065	-1.59717	-15.2873	-15.3578		215	-14.5048	-0.987374	-13.4624	-12.7086
		214	-17.086	-1.84816	-15.2004	-15.2252		214	-14.6134	-1.15411	-13.5339	-12.7361
		213	-17.1812	-2.14842	-15.1363	-15.0053		213	-14.7772	-1.2914	-13.6688	-12.8311
		212	-17.4046	-2.50669	-15.0067	-14.6791		212	-14.9273	-1.43281	-13.8186	-13.0051
		211	-17.7296	-2.91806	-14.7883	-14.202		211	-15.032	-1.63553	-13.9447	-13.2483
		210	-18.0279	-3.41089	-14.368	-13.5132		210	-14.9783	-1.91619	-13.9896	-13.4672
		209	-18.1181	-3.99536	-13.7165	-12.6226		209	-14.7029	-2.32522	-13.8605	-13.519
		208	-17.8191	-4.62187	-12.7698	-11.5465		208	-14.1558	-2.78942	-13.5379	-13.2519
		207	-17.0805	-5.24802	-11.5121	-10.318		207	-13.0263	-3.28417	-12.8654	-12.6721
		206	-15.7276	-5.81685	-9.9392	-8.98259		206	-11.4064	-3.76248	-11.7969	-11.6944
		205	-13.7909	-6.43245	-8.15075	-7.56654		205	-9.36671	-4.29509	-9.9274	-10.2175
		204	-11.1914	-7.06068	-6.23814	-6.11949		204	-6.98638	-4.88824	-7.4193	-8.09741
		203	-7.96562	-7.67316	-4.33011	-4.66763		203	-4.368	-5.48301	-4.46475	-5.21161
		202	-3.90202	-8.25115	-2.5289	-3.25698		202	-1.59097	-6.05161	-1.24246	-1.91264
		201	1.18018	-8.74516	-0.936522	-1.91813		201	1.21237	-6.57377	2.0433	1.47244
		200	6.32321	-9.18205	0.382651	-0.697809		200	3.96089	-7.01865	5.21695	4.64741
		199	10.7646	-9.59057	1.38211	0.358433		199	6.53087	-7.44837	8.10093	7.38444
		198	14.1022	-9.94365	2.07544	1.22124		198	8.84624	-7.82704	10.6016	9.58559
