# Supplementary material for: Co-aggregation and secondary nucleation in the life cycle of human prolactin/galanin functional amyloids
Source: eLife. 2022 Mar 8;11:e73835. doi: 10.7554/eLife.73835 (PMC8993219; doi:10.7554/eLife.73835)
Supplement: Figure 4—figure supplement 2—source data 1. [file elife-73835-fig4-figsupp2-data1.xlsx]

## Sheet: Fig 4-fig sup2 PRL ACTH
X axis time in seconds	Cycle: 5 ACTH 7.8 µM_Y	Fitted Cycle: 5 ACTH 7.8 µM_Y	Cycle: 6 ACTH 15.6 µM_Y	Fitted Cycle: 6 ACTH 15.6 µM_Y	Cycle: 7 ACTH 31.2 µM_Y	Fitted Cycle: 7 ACTH 31.2 µM_Y	Cycle: 8 ACTH 62.4 µM_Y	Fitted Cycle: 8 ACTH 62.4 µM_Y	Cycle: 9 ACTH 124.8 µM_Y	Fitted Cycle: 9 ACTH 124.8 µM_Y	Cycle: 10 ACTH 250 µM_Y	Fitted Cycle: 10 ACTH 250 µM_Y
-59.7	-0.124023	0	0.165039	0	0.0556641	0	-0.112305	0	-0.0341797	0	0.21582	0
-59.6	-0.107422	0	0.142578	0	0.0410156	0	-0.0878906	0	-0.0566406	0	0.232422	0
-59.5	-0.0615234	0	0.106445	0	0.0478516	0	-0.0732422	0	-0.0615234	0	0.258789	0
-59.4	-0.0859375	0	0.113281	0	0.0429688	0	-0.0664063	0	-0.0546875	0	0.285156	0
-59.3	-0.0722656	0	0.115234	0	0.0371094	0	-0.0527344	0	-0.0527344	0	0.287109	0
-59.2	-0.0400391	0	0.116211	0	0.0576172	0	-0.0517578	0	-0.0517578	0	0.288086	0
-59.1	-0.0087893	0	0.108398	0	0.0615232	0	-0.0595706	0	-0.0283206	0	0.291992	0
-59	-0.00976563	0	0.0996094	0	0.0800781	0	-0.0566406	0	-0.0371094	0	0.291016	0
-58.9	-0.0185549	0	0.0791013	0	0.0791013	0	-0.0576174	0	-0.0380862	0	0.27832	0
-58.8	-0.00976563	0	0.0761719	0	0.0800781	0	-0.0605469	0	-0.0410156	0	0.279297	0
-58.7	-0.00585938	0	0.0722656	0	0.0722656	0	-0.0566406	0	-0.0449219	0	0.271484	0
-58.6	-0.0205079	0	0.0771483	0	0.0693358	0	-0.0517579	0	-0.0517579	0	0.268555	0
-58.5	-0.0078125	0	0.0820313	0	0.0742188	0	-0.046875	0	-0.046875	0	0.273438	0
-58.4	0.00683594	0	0.0849609	0	0.0654297	0	-0.0439453	0	-0.0634766	0	0.264648	0
-58.3	0.00878894	0	0.0869139	0	0.0556639	0	-0.0615236	0	-0.0615236	0	0.266601	0
-58.2	0.0195313	0	0.0976563	0	0.078125	0	-0.0507813	0	-0.0625	0	0.269531	0
-58.1	0.0214844	0	0.0996094	0	0.0800781	0	-0.0605469	0	-0.0683594	0	0.271484	0
-58	0.0371094	0	0.107422	0	0.0761719	0	-0.0527344	0	-0.0605469	0	0.279297	0
-57.9	0.0322267	0	0.0986329	0	0.0712892	0	-0.0576171	0	-0.0576171	0	0.270508	0
-57.8	0.0371093	0	0.103516	0	0.0761718	0	-0.0527345	0	-0.0527345	0	0.275391	0
-57.7	0.0273438	0	0.105469	0	0.078125	0	-0.0625	0	-0.0507813	0	0.269531	0
-57.6	0.0332031	0	0.103516	0	0.0839844	0	-0.0566406	0	-0.0449219	0	0.275391	0
-57.5	0.0351563	0	0.105469	0	0.0742188	0	-0.0546875	0	-0.0429688	0	0.265625	0
-57.4	0.0292969	0	0.107422	0	0.0683594	0	-0.0605469	0	-0.0410156	0	0.267578	0
-57.3	0.0341797	0	0.112305	0	0.0732422	0	-0.0673828	0	-0.0478516	0	0.260742	0
-57.2	0.0419922	0	0.112305	0	0.0732422	0	-0.0673828	0	-0.0478516	0	0.25293	0
-57.1	0.0449218	0	0.123047	0	0.0839843	0	-0.0566407	0	-0.0371095	0	0.263672	0
-57	0.0449219	0	0.111328	0	0.0722656	0	-0.0644531	0	-0.0449219	0	0.263672	0
-56.9	0.0498047	0	0.116211	0	0.0771484	0	-0.0595703	0	-0.0400391	0	0.256836	0
-56.8	0.0517578	0	0.110352	0	0.0712891	0	-0.0576172	0	-0.0380859	0	0.258789	0
-56.7	0.0595703	0	0.118164	0	0.0791016	0	-0.0498047	0	-0.0419922	0	0.266602	0
-56.6	0.0537108	0	0.112305	0	0.0732421	0	-0.0439454	0	-0.0361329	0	0.264648	0
-56.5	0.0576172	0	0.108398	0	0.0771484	0	-0.0517578	0	-0.0400391	0	0.268555	0
-56.4	0.0605469	0	0.111328	0	0.0800781	0	-0.0488281	0	-0.0371094	0	0.259766	0
-56.3	0.0595702	0	0.106445	0	0.0791014	0	-0.0419923	0	-0.0419923	0	0.258789	0
-56.2	0.0595703	0	0.106445	0	0.0791016	0	-0.0537109	0	-0.0419922	0	0.24707	0
-56.1	0.0654296	0	0.112305	0	0.0849608	0	-0.0556642	0	-0.0439454	0	0.25293	0
-56	0.0722656	0	0.107422	0	0.0917969	0	-0.0488281	0	-0.0371094	0	0.248047	0
-55.9	0.0634764	0	0.102539	0	0.0947264	0	-0.0576173	0	-0.0458986	0	0.250976	0
-55.8	0.0664063	0	0.105469	0	0.0859375	0	-0.0546875	0	-0.0429688	0	0.253906	0
-55.7	0.0712891	0	0.110352	0	0.0908203	0	-0.0498047	0	-0.0380859	0	0.250977	0
-55.6	0.0761719	0	0.115234	0	0.0957031	0	-0.0449219	0	-0.0449219	0	0.255859	0
-55.5	0.0683594	0	0.115234	0	0.0957031	0	-0.0527344	0	-0.0527344	0	0.244141	0
-55.4	0.0751952	0	0.110351	0	0.102539	0	-0.0458986	0	-0.0458986	0	0.243164	0
-55.3	0.0664063	0	0.113281	0	0.09375	0	-0.0429688	0	-0.0429688	0	0.246094	0
-55.2	0.0712891	0	0.118164	0	0.0986328	0	-0.0498047	0	-0.0380859	0	0.239258	0
-55.1	0.0830078	0	0.118164	0	0.0986328	0	-0.0498047	0	-0.0380859	0	0.250977	0
-55	0.0859375	0	0.121094	0	0.09375	0	-0.046875	0	-0.0351563	0	0.242188	0
-54.9	0.0742188	0	0.121094	0	0.09375	0	-0.0546875	0	-0.0351563	0	0.242188	0
-54.8	0.0888671	0	0.124023	0	0.0966796	0	-0.0517579	0	-0.0322267	0	0.245117	0
-54.7	0.0927734	0	0.120117	0	0.100586	0	-0.0595703	0	-0.0400391	0	0.241211	0
-54.6	0.0810547	0	0.120117	0	0.100586	0	-0.0595703	0	-0.0400391	0	0.241211	0
-54.5	0.0976563	0	0.125	0	0.09375	0	-0.0546875	0	-0.0351563	0	0.234375	0
-54.4	0.0996094	0	0.115234	0	0.0957031	0	-0.0527344	0	-0.0410156	0	0.236328	0
-54.3	0.0937499	0	0.121094	0	0.101562	0	-0.0585939	0	-0.0351564	0	0.242187	0
-54.2	0.0957031	0	0.123047	0	0.103516	0	-0.0644531	0	-0.0332031	0	0.236328	0
-54.1	0.0839844	0	0.123047	0	0.103516	0	-0.0644531	0	-0.0332031	0	0.236328	0
-54	0.0869141	0	0.118164	0	0.106445	0	-0.0615234	0	-0.0302734	0	0.239258	0
-53.9	0.0859374	0	0.113281	0	0.113281	0	-0.0546876	0	-0.0234376	0	0.234375	0
-53.8	0.0888672	0	0.116211	0	0.108398	0	-0.0517578	0	-0.0205078	0	0.237305	0
-53.7	0.0771484	0	0.116211	0	0.108398	0	-0.0517578	0	-0.0205078	0	0.237305	0
-53.6	0.080078	0	0.111328	0	0.0996093	0	-0.0488282	0	-0.029297	0	0.240234	0
-53.5	0.0800781	0	0.111328	0	0.0996094	0	-0.0605469	0	-0.0292969	0	0.228516	0
-53.4	0.078125	0	0.105469	0	0.105469	0	-0.0546875	0	-0.0234375	0	0.234375	0
-53.3	0.0810546	0	0.108398	0	0.100586	0	-0.0517579	0	-0.0205079	0	0.229492	0
-53.2	0.0830078	0	0.110352	0	0.102539	0	-0.0576172	0	-0.0263672	0	0.231445	0
-53.1	0.086914	0	0.102539	0	0.106445	0	-0.053711	0	-0.022461	0	0.235352	0
-53	0.0800781	0	0.0996094	0	0.0996094	0	-0.0488281	0	-0.0292969	0	0.228516	0
-52.9	0.0859374	0	0.105469	0	0.105469	0	-0.0429689	0	-0.0234376	0	0.234375	0
-52.8	0.0927734	0	0.100586	0	0.112305	0	-0.0478516	0	-0.0244141	0	0.233398	0
-52.7	0.0957031	0	0.103516	0	0.103516	0	-0.0449219	0	-0.0214844	0	0.236328	0
-52.6	0.0986327	0	0.106445	0	0.106445	0	-0.0302736	0	-0.0185548	0	0.24707	0
-52.5	0.0908203	0	0.106445	0	0.106445	0	-0.0302734	0	-0.0185547	0	0.24707	0
-52.4	0.0878906	0	0.103516	0	0.115234	0	-0.0332031	0	-0.0214844	0	0.244141	0
-52.3	0.0703126	0	0.0976564	0	0.109375	0	-0.0390624	0	-0.0195311	0	0.238281	0
-52.2	0.0732422	0	0.100586	0	0.112305	0	-0.0361328	0	-0.0244141	0	0.241211	0
-52.1	0.0820313	0	0.0976563	0	0.121094	0	-0.03125	0	-0.0273438	0	0.230469	0
-52	0.0820313	0	0.0976563	0	0.121094	0	-0.0390625	0	-0.0390625	0	0.230469	0
-51.9	0.0898438	0	0.0976563	0	0.121094	0	-0.0390625	0	-0.0390625	0	0.230469	0
-51.8	0.0898438	0	0.0898438	0	0.121094	0	-0.0390625	0	-0.0390625	0	0.230469	0
-51.7	0.0947266	0	0.0947266	0	0.114258	0	-0.0341797	0	-0.0341797	0	0.235352	0
-51.6	0.0976561	0	0.0976561	0	0.117187	0	-0.0234376	0	-0.0429689	0	0.226562	0
-51.5	0.100586	0	0.100586	0	0.120117	0	-0.0283203	0	-0.0400391	0	0.229492	0
-51.4	0.0957031	0	0.103516	0	0.123047	0	-0.0253906	0	-0.0449219	0	0.224609	0
-51.3	0.0957031	0	0.0917969	0	0.123047	0	-0.0253906	0	-0.0449219	0	0.224609	0
-51.2	0.100586	0	0.0966796	0	0.116211	0	-0.0322266	0	-0.0517579	0	0.229492	0
-51.1	0.107422	0	0.095703	0	0.123047	0	-0.0253907	0	-0.044922	0	0.224609	0
-51	0.110352	0	0.0869141	0	0.118164	0	-0.0302734	0	-0.0419922	0	0.227539	0
-50.9	0.113281	0	0.0898438	0	0.121094	0	-0.0273438	0	-0.0390625	0	0.230469	0
-50.8	0.115234	0	0.0917968	0	0.123047	0	-0.0371094	0	-0.0371094	0	0.224609	0
-50.7	0.123047	0	0.0996093	0	0.130859	0	-0.029297	0	-0.0371095	0	0.232422	0
-50.6	0.113281	0	0.101563	0	0.132813	0	-0.0273438	0	-0.0351563	0	0.222656	0
-50.5	0.115234	0	0.103516	0	0.123047	0	-0.0253906	0	-0.0332031	0	0.224609	0
-50.4	0.107422	0	0.103516	0	0.123047	0	-0.0253906	0	-0.0332031	0	0.224609	0
-50.3	0.113281	0	0.0976563	0	0.121094	0	-0.0195313	0	-0.0390625	0	0.230469	0
-50.2	0.113281	0	0.0976563	0	0.121094	0	-0.0273438	0	-0.0390625	0	0.230469	0
-50.1	0.116211	0	0.100586	0	0.124023	0	-0.0166016	0	-0.0361328	0	0.233398	0
-50	0.107422	0	0.103516	0	0.115234	0	-0.0136719	0	-0.0332031	0	0.236328	0
-49.9	0.101563	0	0.101563	0	0.121094	0	-0.015625	0	-0.0351563	0	0.230469	0
-49.8	0.102539	0	0.110352	0	0.12207	0	-0.0185547	0	-0.0380859	0	0.231445	0
-49.7	0.102539	0	0.0986328	0	0.110352	0	-0.0185547	0	-0.0498047	0	0.231445	0
-49.6	0.0947265	0	0.102539	0	0.114258	0	-0.0146485	0	-0.0458985	0	0.223633	0
-49.5	0.100586	0	0.108398	0	0.112305	0	-0.00878906	0	-0.0400391	0	0.229492	0
-49.4	0.0957031	0	0.103516	0	0.115234	0	-0.00585938	0	-0.0449219	0	0.232422	0
-49.3	0.0869141	0	0.106445	0	0.106445	0	-0.00292969	0	-0.0419922	0	0.235352	0
-49.2	0.0986328	0	0.106445	0	0.106445	0	-0.0146484	0	-0.0419922	0	0.235352	0
-49.1	0.104492	0	0.100586	0	0.112305	0	-0.0166016	0	-0.0478516	0	0.241211	0
-49	0.0908203	0	0.0908203	0	0.110352	0	-0.0185547	0	-0.0498047	0	0.231445	0
-48.9	0.0830078	0	0.0908203	0	0.0986328	0	-0.0185547	0	-0.0498047	0	0.231445	0
-48.8	0.0830078	0	0.0908203	0	0.0986328	0	-0.0302734	0	-0.0576172	0	0.219727	0
-48.7	0.0957031	0	0.103516	0	0.103516	0	-0.0253907	0	-0.0449219	0	0.244141	0
-48.6	0.105469	0	0.101562	0	0.113281	0	-0.0156251	0	-0.0468751	0	0.261719	0
-48.5	0.108398	0	0.116211	0	0.116211	0	-0.000976563	0	-0.0322266	0	0.276367	0
-48.4	0.115234	0	0.123047	0	0.123047	0	0.00585938	0	-0.0332031	0	0.302734	0
-48.3	0.129883	0	0.125977	0	0.137695	0	0.00878906	0	-0.0419922	0	0.305664	0
-48.2	0.129883	0	0.125977	0	0.137695	0	0.00878912	0	-0.0419921	0	0.317383	0
-48.1	0.118164	0	0.125977	0	0.125977	0	0.00878918	0	-0.0498046	0	0.336914	0
-48	0.137695	0	0.133789	0	0.114258	0	0.0166016	0	-0.0537109	0	0.336914	0
-47.9	0.140625	0	0.128906	0	0.0820313	0	0.0117188	0	-0.0585938	0	0.339844	0
-47.8	0.140625	0	0.140625	0	0.0703125	0	0.0117188	0	-0.0703125	0	0.339844	0
-47.7	0.138672	0	0.138672	0	0.0683594	0	-0.00195313	0	-0.0722656	0	0.349609	0
-47.6	0.150391	0	0.146484	0	0.0996094	0	0.0175781	0	-0.0605469	0	0.369141	0
-47.5	0.140625	0	0.148438	0	0.109375	0	0.0195313	0	-0.0585938	0	0.378906	0
-47.4	0.148438	0	0.148438	0	0.136719	0	0.0195313	0	-0.0507813	0	0.398438	0
-47.3	-0.0585938	0	-0.0585938	0	-0.046875	0	-0.1875	0	-0.257813	0	0.203125	0
-47.2	-0.0957032	0	-0.107422	0	-0.076172	0	-0.224609	0	-0.302734	0	0.185547	0
-47.1	-0.141601	0	-0.15332	0	-0.102539	0	-0.262695	0	-0.352539	0	0.147461	0
-47	-0.186523	0	-0.209961	0	-0.12793	0	-0.31543	0	-0.405273	0	0.12207	0
-46.9	-0.236328	0	-0.259766	0	-0.158203	0	-0.376953	0	-0.455078	0	0.0839844	0
-46.8	-0.266602	0	-0.317383	0	-0.188477	0	-0.426758	0	-0.516602	0	0.0419922	0
-46.7	-0.291016	0	-0.341797	0	-0.193359	0	-0.451172	0	-0.541016	0	0.0371095	0
-46.6	-0.296875	0	-0.359375	0	-0.199219	0	-0.480469	0	-0.558594	0	0.03125	0
-46.5	-0.332031	0	-0.382813	0	-0.203125	0	-0.503906	0	-0.582031	0	0.0273438	0
-46.4	-0.34375	0	-0.40625	0	-0.203125	0	-0.523438	0	-0.601563	0	0.0234375	0
-46.3	-0.34668	0	-0.40918	0	-0.186523	0	-0.538086	0	-0.604492	0	0.0205079	0
-46.2	-0.351563	0	-0.414063	0	-0.183594	0	-0.542969	0	-0.609375	0	0.0273438	0
-46.1	-0.353516	0	-0.416016	0	-0.166016	0	-0.544922	0	-0.623047	0	0.0566406	0
-46	-0.350586	0	-0.420898	0	-0.139648	0	-0.549805	0	-0.620117	0	0.0869141	0
-45.9	-0.370117	0	-0.44043	0	-0.139648	0	-0.569336	0	-0.62793	0	0.110352	0
-45.8	-0.366211	0	-0.456055	0	-0.116211	0	-0.577148	0	-0.647461	0	0.0830079	0
-45.7	-0.378906	0	-0.46875	0	-0.109375	0	-0.578125	0	-0.660156	0	0.058594	0
-45.6	-0.362305	0	-0.463867	0	-0.0849609	0	-0.584961	0	-0.655273	0	0.0634766	0
-45.5	-0.37793	0	-0.47168	0	-0.0810547	0	-0.600586	0	-0.678711	0	0.0283203	0
-45.4	-0.376953	0	-0.486328	0	-0.0683594	0	-0.607422	0	-0.685547	0	0.00195313	0
-45.3	-0.366211	0	-0.499023	0	-0.0693358	0	-0.616211	0	-0.686523	0	-0.0302733	0
-45.2	-0.351563	0	-0.472656	0	-0.00390625	0	-0.589844	0	-0.671875	0	-0.0234375	0
-45.1	-0.287109	0	-0.427734	0	0.0722655	0	-0.544922	0	-0.626953	0	0.0136718	0
-45	-0.208008	0	-0.360352	0	0.120117	0	-0.477539	0	-0.55957	0	0.0615234	0
-44.9	0.00488281	0	-0.166992	0	0.325195	0	-0.264648	0	-0.362305	0	0.254883	0
-44.8	0.00683564	0	-0.157227	0	0.315429	0	-0.254883	0	-0.364258	0	0.245117	0
-44.7	0.0214843	0	-0.130859	0	0.330078	0	-0.248047	0	-0.349609	0	0.220703	0
-44.6	0.0361326	0	-0.116211	0	0.325195	0	-0.233399	0	-0.311524	0	0.235351	0
-44.5	0.0410156	0	-0.111328	0	0.310547	0	-0.240234	0	-0.306641	0	0.212891	0
-44.4	0.0605469	0	-0.111328	0	0.287109	0	-0.220703	0	-0.291016	0	0.169922	0
-44.3	0.0673825	0	-0.0927737	0	0.297851	0	-0.202149	0	-0.272461	0	0.145508	0
-44.2	0.0732419	0	-0.0791019	0	0.272461	0	-0.196289	0	-0.235352	0	0.131836	0
-44.1	0.0761716	0	-0.0644534	0	0.255859	0	-0.173828	0	-0.212891	0	0.115234	0
-44	0.0898438	0	-0.0429688	0	0.257813	0	-0.160156	0	-0.179688	0	0.128906	0
-43.9	0.112305	0	0.0107422	0	0.25293	0	-0.137695	0	-0.145508	0	0.163086	0
-43.8	0.152343	0	0.039062	0	0.25	0	-0.117188	0	-0.109375	0	0.210937	0
-43.7	0.151367	0	0.0615234	0	0.241211	0	-0.0986328	0	-0.118164	0	0.209961	0
-43.6	0.147461	0	0.0537111	0	0.237305	0	-0.0634764	0	-0.133789	0	0.155274	0
-43.5	0.164063	0	0.0507813	0	0.222656	0	-0.015625	0	-0.136719	0	0.09375	0
-43.4	0.175781	0	0.0234375	0	0.195313	0	0.015625	0	-0.183594	0	0.015625	0
-43.3	0.199218	0	0.027343	0	0.199218	0	0.027343	0	-0.191407	0	-0.050782	0
-43.2	0.243163	0	0.000975907	0	0.211913	0	0.0244134	0	-0.225587	0	-0.12793	0
-43.1	0.243163	0	-0.0185555	0	0.211913	0	-0.057618	0	-0.256837	0	-0.178712	0
-43	0.217773	0	-0.0244141	0	0.194336	0	-0.172852	0	-0.282227	0	-0.223633	0
-42.9	0.123047	0	-0.0410156	0	0.150391	0	-0.298828	0	-0.330078	0	-0.259766	0
-42.8	0.0996088	0	-0.0332037	0	0.126953	0	-0.490235	0	-0.330079	0	-0.283204	0
-42.7	-0.00683641	0	-0.0380864	0	0.0830073	0	-0.608399	0	-0.34668	0	-0.256836	0
-42.6	-0.0927737	0	-0.03418	0	0.043945	0	-0.553711	0	-0.374024	0	-0.213867	0
-42.5	-0.160156	0	-0.0390625	0	0.03125	0	-0.488281	0	-0.417969	0	-0.171875	0
-42.4	-0.224609	0	-0.0371094	0	0.0136719	0	-0.408203	0	-0.404297	0	-0.115234	0
-42.3	-0.208984	0	-0.041015	0	-0.0292962	0	-0.349609	0	-0.388671	0	-0.0996087	0
-42.2	-0.164063	0	-0.015625	0	-0.015625	0	-0.285156	0	-0.351563	0	-0.0429688	0
-42.1	-0.0810547	0	0.00488281	0	-0.00292969	0	-0.22168	0	-0.291992	0	0.0283203	0
-42	-0.0175781	0	0.0292969	0	0.00976563	0	-0.169922	0	-0.236328	0	0.0800781	0
-41.9	0.0341797	0	0.0458984	0	0.00683594	0	-0.114258	0	-0.204102	0	0.135742	0
-41.8	0.0195314	0	0.0468752	0	-0.0234373	0	-0.0703123	0	-0.171875	0	0.15625	0
-41.7	0.0429688	0	0.03125	0	0	0	-0.0664063	0	-0.167969	0	0.171875	0
-41.6	0.0849609	0	0.0419921	0	0.0224609	0	-0.0673829	0	-0.157227	0	0.182617	0
-41.5	0.0771484	0	0.0419922	0	0.0146484	0	-0.0634766	0	-0.15332	0	0.194336	0
-41.4	0.0859375	0	0.0546875	0	0.0351563	0	-0.0742188	0	-0.132813	0	0.175781	0
-41.3	0.0859377	0	0.0546877	0	0.0351564	0	-0.0859373	0	-0.136719	0	0.152344	0
-41.2	0.0634767	0	0.0439454	0	0.0322267	0	-0.0849608	0	-0.135742	0	0.15332	0
-41.1	0.0722656	0	0.0410156	0	0.0136719	0	-0.0957031	0	-0.134766	0	0.142578	0
-41	0.0556641	0	0.0244141	0	0.0166016	0	-0.0849609	0	-0.131836	0	0.145508	0
-40.9	0.0458984	0	0.0224609	0	0.00292969	0	-0.0751953	0	-0.133789	0	0.131836	0
-40.8	0.0410156	0	0.0371093	0	-0.0019532	0	-0.0917969	0	-0.138672	0	0.138672	0
-40.7	0.0410156	0	0.0292969	0	0.00976563	0	-0.0917969	0	-0.150391	0	0.138672	0
-40.6	0.0332031	0	0.0292969	0	0.00195313	0	-0.0996094	0	-0.158203	0	0.130859	0
-40.5	0.03125	0	0.0273438	0	0	0	-0.0898438	0	-0.160156	0	0.128906	0
-40.4	0.0283203	0	0.0166016	0	-0.00292969	0	-0.0927734	0	-0.163086	0	0.114258	0
-40.3	0.0156251	0	0.0156251	0	-0.0156249	0	-0.0937499	0	-0.164062	0	0.113281	0
-40.2	-0.00292961	0	0.00878914	0	-0.0107421	0	-0.100586	0	-0.182617	0	0.106445	0
-40.1	-0.00292969	0	-0.00292969	0	-0.0224609	0	-0.100586	0	-0.182617	0	0.106445	0
-40	-0.0146484	0	-0.00683594	0	-0.0146484	0	-0.0966797	0	-0.194336	0	0.102539	0
-39.9	-0.015625	0	-0.0078125	0	-0.0273438	0	-0.0976563	0	-0.195313	0	0.101563	0
-39.8	-0.0195313	0	-0.0117188	0	-0.03125	0	-0.109375	0	-0.199219	0	0.0976563	0
-39.7	-0.0234375	0	-0.015625	0	-0.0351563	0	-0.113281	0	-0.203125	0	0.0859375	0
-39.6	-0.0234375	0	-0.015625	0	-0.0351563	0	-0.113281	0	-0.214844	0	0.0859375	0
-39.5	-0.0302734	0	-0.0224609	0	-0.0419922	0	-0.120117	0	-0.209961	0	0.0791016	0
-39.4	-0.0361328	0	-0.0283203	0	-0.0556641	0	-0.118164	0	-0.227539	0	0.0732422	0
-39.3	-0.0478516	0	-0.0283203	0	-0.0556641	0	-0.118164	0	-0.21582	0	0.0732422	0
-39.2	-0.0556639	0	-0.0361327	0	-0.0634764	0	-0.133789	0	-0.223633	0	0.0537111	0
-39.1	-0.0673828	0	-0.0400391	0	-0.0791016	0	-0.137695	0	-0.227539	0	0.0498047	0
-39	-0.0683594	0	-0.0410156	0	-0.0800781	0	-0.138672	0	-0.228516	0	0.0488281	0
-38.9	-0.0712891	0	-0.0439453	0	-0.0830078	0	-0.141602	0	-0.231445	0	0.0458984	0
-38.8	-0.0683595	0	-0.0410157	0	-0.0800782	0	-0.138672	0	-0.228516	0	0.048828	0
-38.7	-0.0849609	0	-0.0576172	0	-0.0849609	0	-0.143555	0	-0.233398	0	0.0439453	0
-38.6	-0.0898438	0	-0.0625	0	-0.0898438	0	-0.148438	0	-0.25	0	0.0390625	0
-38.5	-0.0898438	0	-0.0625	0	-0.0898438	0	-0.148438	0	-0.25	0	0.0390625	0
-38.4	-0.0927734	0	-0.0654297	0	-0.104492	0	-0.143555	0	-0.260742	0	0.0361328	0
-38.3	-0.0966797	0	-0.0771484	0	-0.108398	0	-0.147461	0	-0.264648	0	0.0244141	0
-38.2	-0.110351	0	-0.0830077	0	-0.114258	0	-0.15332	0	-0.270508	0	0.0185548	0
-38.1	-0.124023	0	-0.0849609	0	-0.124023	0	-0.155273	0	-0.28418	0	0.00488281	0
-38	-0.119141	0	-0.0800781	0	-0.119141	0	-0.158203	0	-0.279297	0	0.00976563	0
-37.9	-0.121094	0	-0.09375	0	-0.121094	0	-0.160156	0	-0.28125	0	0.0078125	0
-37.8	-0.124023	0	-0.104492	0	-0.135742	0	-0.155273	0	-0.28418	0	-0.00292969	0
-37.7	-0.128906	0	-0.101562	0	-0.132812	0	-0.152344	0	-0.289062	0	7.45058e-08	0
-37.6	-0.131836	0	-0.104492	0	-0.135742	0	-0.155273	0	-0.291992	0	-0.0146484	0
-37.5	-0.131836	0	-0.116211	0	-0.143555	0	-0.143555	0	-0.303711	0	-0.0146484	0
-37.4	-0.128906	0	-0.113281	0	-0.140625	0	-0.140625	0	-0.300781	0	-0.0117188	0
-37.3	-0.133789	0	-0.114258	0	-0.145508	0	-0.133789	0	-0.293945	0	-0.00488289	0
-37.2	-0.135742	0	-0.12793	0	-0.147461	0	-0.135742	0	-0.295898	0	-0.00683586	0
-37.1	-0.130859	0	-0.123047	0	-0.142578	0	-0.130859	0	-0.291016	0	-0.0019532	0
-37	-0.128906	0	-0.121094	0	-0.148438	0	-0.128906	0	-0.289063	0	0	0
-36.9	-0.124023	0	-0.116211	0	-0.143555	0	-0.124023	0	-0.291992	0	0.00488281	0
-36.8	-0.109375	0	-0.113281	0	-0.140625	0	-0.121094	0	-0.289063	0	0.0195313	0
-36.7	-0.107422	0	-0.119141	0	-0.150391	0	-0.111328	0	-0.298828	0	0.0214844	0
-36.6	-0.104492	0	-0.108398	0	-0.147461	0	-0.108398	0	-0.295898	0	0.0126953	0
-36.5	-0.101563	0	-0.105469	0	-0.144531	0	-0.105469	0	-0.304688	0	0.015625	0
-36.4	-0.111328	0	-0.111328	0	-0.142578	0	-0.103516	0	-0.310547	0	0.0175781	0
-36.3	-0.109375	0	-0.109375	0	-0.152344	0	-0.101563	0	-0.308594	0	0.0195313	0
-36.2	-0.106445	0	-0.106445	0	-0.149414	0	-0.0869142	0	-0.305664	0	0.0107421	0
-36.1	-0.100586	0	-0.112305	0	-0.151367	0	-0.0810548	0	-0.299805	0	0.0166014	0
-36	-0.110352	0	-0.110352	0	-0.149414	0	-0.0791016	0	-0.297852	0	0.0107422	0
-35.9	-0.09375	0	-0.105469	0	-0.144531	0	-0.0742188	0	-0.292969	0	0.015625	0
-35.8	-0.0888673	0	-0.112305	0	-0.139649	0	-0.0693361	0	-0.299805	0	0.0205077	0
-35.7	-0.0839844	0	-0.107422	0	-0.134766	0	-0.0761719	0	-0.294922	0	0.0253906	0
-35.6	-0.0781251	0	-0.0898439	0	-0.140625	0	-0.0585939	0	-0.289063	0	0.0195311	0
-35.5	-0.0742188	0	-0.0976563	0	-0.144531	0	-0.0664063	0	-0.285156	0	0.0234375	0
-35.4	-0.0722656	0	-0.0957031	0	-0.142578	0	-0.0527344	0	-0.283203	0	0.0253906	0
-35.3	-0.0664064	0	-0.0976564	0	-0.136719	0	-0.0468751	0	-0.285156	0	0.0234374	0
-35.2	-0.0615235	0	-0.0927735	0	-0.131836	0	-0.053711	0	-0.272461	0	0.0283202	0
-35.1	-0.0585939	0	-0.0898439	0	-0.140625	0	-0.0390626	0	-0.277344	0	0.0312499	0
-35	-0.0654297	0	-0.0849609	0	-0.135742	0	-0.0458984	0	-0.272461	0	0.0361328	0
-34.9	-0.0488281	0	-0.0800781	0	-0.130859	0	-0.0410156	0	-0.267578	0	0.0292969	0
-34.8	-0.0439454	0	-0.0751954	0	-0.125977	0	-0.0439454	0	-0.262695	0	0.0341796	0
-34.7	-0.038086	0	-0.069336	0	-0.120117	0	-0.038086	0	-0.256836	0	0.040039	0
-34.6	-0.0312501	0	-0.0625001	0	-0.121094	0	-0.0312501	0	-0.25	0	0.0468749	0
-34.5	-0.0283203	0	-0.0595703	0	-0.118164	0	-0.0283203	0	-0.258789	0	0.0419922	0
-34.4	-0.0371094	0	-0.0566406	0	-0.115234	0	-0.0253906	0	-0.255859	0	0.0449219	0
-34.3	-0.0332032	0	-0.0644532	0	-0.111328	0	-0.0214844	0	-0.251953	0	0.0488281	0
-34.2	-0.03125	0	-0.0625	0	-0.121094	0	-0.0195313	0	-0.25	0	0.0507813	0
-34.1	-0.0332032	0	-0.0566407	0	-0.115234	0	-0.013672	0	-0.244141	0	0.0449218	0
-34	-0.0332031	0	-0.0644531	0	-0.115234	0	-0.0136719	0	-0.244141	0	0.0449219	0
-33.9	-0.0302734	0	-0.0615234	0	-0.112305	0	-0.0107422	0	-0.249023	0	0.0478516	0
-33.8	-0.022461	0	-0.053711	0	-0.104492	0	-0.0029298	0	-0.241211	0	0.055664	0
-33.7	-0.0146484	0	-0.0654297	0	-0.112305	0	-0.00292969	0	-0.241211	0	0.0478516	0
-33.6	-0.0224609	0	-0.0654297	0	-0.112305	0	-0.0146484	0	-0.25293	0	0.0478516	0
-33.5	-0.0175781	0	-0.0605469	0	-0.107422	0	-0.00976563	0	-0.248047	0	0.0527344	0
-33.4	-0.015625	0	-0.0585938	0	-0.117188	0	-0.0078125	0	-0.246094	0	0.0546875	0
-33.3	-0.0126954	0	-0.0634767	0	-0.114258	0	-0.00488292	0	-0.243164	0	0.0458983	0
-33.2	-0.0126953	0	-0.0634766	0	-0.114258	0	-0.00488281	0	-0.243164	0	0.0458984	0
-33.1	-0.00878914	0	-0.0595704	0	-0.110352	0	-0.000976637	0	-0.239258	0	0.0498046	0
-33	-0.00683594	0	-0.0576172	0	-0.108398	0	0.000976563	0	-0.237305	0	0.0517578	0
-32.9	-0.00390625	0	-0.0664063	0	-0.105469	0	-0.00390625	0	-0.234375	0	0.0546875	0
-32.8	0.00195301	0	-0.060547	0	-0.111328	0	0.00195301	0	-0.228516	0	0.0605468	0
-32.7	0.00195313	0	-0.0605469	0	-0.111328	0	0.00195313	0	-0.228516	0	0.0488281	0
-32.6	0.00683594	0	-0.0556641	0	-0.106445	0	-0.00488281	0	-0.223633	0	0.0537109	0
-32.5	-0.00195313	0	-0.0527344	0	-0.103516	0	0.00976563	0	-0.220703	0	0.0566406	0
-32.4	-0.00488281	0	-0.0556641	0	-0.106445	0	0.00683594	0	-0.223633	0	0.0458984	0
-32.3	0.00292961	0	-0.0478516	0	-0.0986329	0	0.0146484	0	-0.21582	0	0.0537109	0
-32.2	0.00878895	0	-0.0419923	0	-0.0927735	0	0.00878895	0	-0.209961	0	0.0595702	0
-32.1	0.0107422	0	-0.0400391	0	-0.0908203	0	0.0107422	0	-0.208008	0	0.0615234	0
-32	0.0136719	0	-0.0371094	0	-0.0878906	0	0.0136719	0	-0.216797	0	0.0644531	0
-31.9	0.00488278	0	-0.038086	0	-0.0888672	0	0.00488278	0	-0.217773	0	0.0634765	0
-31.8	0.00976563	0	-0.0449219	0	-0.0839844	0	0.00976563	0	-0.212891	0	0.0683594	0
-31.7	0.00976563	0	-0.0449219	0	-0.0917969	0	-0.00195313	0	-0.212891	0	0.0566406	0
-31.6	0.0156249	0	-0.0390626	0	-0.0859376	0	0.00390614	0	-0.207031	0	0.0624999	0
-31.5	0.015625	0	-0.0390625	0	-0.0859375	0	0.00390625	0	-0.207031	0	0.0625	0
-31.4	0.0175781	0	-0.0449219	0	-0.0839844	0	0.00585938	0	-0.212891	0	0.0644531	0
-31.3	0.0126953	0	-0.0380859	0	-0.0771484	0	0.0126953	0	-0.206055	0	0.0712891	0
-31.2	0.0146484	0	-0.0361328	0	-0.0751953	0	0.0146484	0	-0.204102	0	0.0732422	0
-31.1	0.00976551	0	-0.0332032	0	-0.0722657	0	0.017578	0	-0.193359	0	0.0683593	0
-31	0.0146484	0	-0.0283203	0	-0.0673828	0	0.0146484	0	-0.188477	0	0.0615234	0
-30.9	0.0146484	0	-0.0283203	0	-0.0673828	0	0.0224609	0	-0.188477	0	0.0615234	0
-30.8	0.00585932	0	-0.0253907	0	-0.0644532	0	0.0253906	0	-0.185547	0	0.0644531	0
-30.7	0.00878906	0	-0.0224609	0	-0.0615234	0	0.0205078	0	-0.182617	0	0.0595703	0
-30.6	0.0107421	0	-0.0205079	0	-0.0712891	0	0.0224609	0	-0.180664	0	0.0498046	0
-30.5	0.0107422	0	-0.0205078	0	-0.0595703	0	0.0107422	0	-0.180664	0	0.0498047	0
-30.4	0.0126953	0	-0.0302734	0	-0.0693359	0	0.0126953	0	-0.178711	0	0.0517578	0
-30.3	0.0156249	0	-0.0156251	0	-0.0664063	0	0.0156249	0	-0.164063	0	0.0546874	0
-30.2	0.0214844	0	-0.0214844	0	-0.0605469	0	0.00976563	0	-0.169922	0	0.0605469	0
-30.1	0.0214844	0	-0.0214844	0	-0.0605469	0	0.00976563	0	-0.158203	0	0.0605469	0
-30	0.015625	0	-0.0195313	0	-0.0585938	0	0.0117188	0	-0.15625	0	0.0507813	0
-29.9	0.00585934	0	-0.0175782	0	-0.0566407	0	0.00585934	0	-0.166016	0	0.0527343	0
-29.8	0.0107422	0	-0.0205078	0	-0.0595703	0	0.0107422	0	-0.161133	0	0.0576172	0
-29.7	0.0136718	0	-0.0175782	0	-0.0566407	0	0.00195307	0	-0.158203	0	0.0605468	0
-29.6	0.00683594	0	-0.0126953	0	-0.0517578	0	0.00683594	0	-0.15332	0	0.0576172	0
-29.5	0.00195313	0	-0.00976563	0	-0.0488281	0	0.00976563	0	-0.150391	0	0.0605469	0
-29.4	0.00195313	0	-0.00976563	0	-0.0488281	0	0.00976563	0	-0.158203	0	0.0605469	0
-29.3	0.00488278	0	-0.0185547	0	-0.0458985	0	0.0126953	0	-0.155273	0	0.0634765	0
-29.2	-0.00292969	0	-0.0146484	0	-0.0419922	0	0.0166016	0	-0.151367	0	0.0673828	0
-29.1	-0.00195324	0	-0.013672	0	-0.0527345	0	0.00976551	0	-0.150391	0	0.0683593	0
-29	0.000976563	0	-0.0107422	0	-0.0498047	0	0.0126953	0	-0.147461	0	0.0595703	0
-28.9	-0.00292969	0	-0.00683594	0	-0.0458984	0	0.0166016	0	-0.143555	0	0.0634766	0
-28.8	-0.00292969	0	-0.00683594	0	-0.0458984	0	0.00488281	0	-0.143555	0	0.0634766	0
-28.7	-0.0117188	0	-0.00390631	0	-0.0507813	0	0.00781244	0	-0.140625	0	0.0585937	0
-28.6	-0.00390632	0	-0.00390632	0	-0.0429688	0	0.0156249	0	-0.132813	0	0.0664062	0
-28.5	-0.00390625	0	-0.00390625	0	-0.0429688	0	0.0273438	0	-0.144531	0	0.0664063	0
-28.4	-0.0117188	0	-0.00390625	0	-0.0429688	0	0.015625	0	-0.152344	0	0.0664063	0
-28.3	-0.0117188	0	-0.00390625	0	-0.0429688	0	0.015625	0	-0.152344	0	0.0664063	0
-28.2	-0.006836	0	0.000976503	0	-0.0498047	0	0.0205078	0	-0.147461	0	0.0595703	0
-28.1	-0.015625	0	0.00390625	0	-0.046875	0	0.0234375	0	-0.144531	0	0.0625	0
-28	-0.0126953	0	0.00683594	0	-0.0439453	0	0.0263672	0	-0.141602	0	0.0654297	0
-27.9	-0.022461	0	0.00878903	0	-0.0419922	0	0.0283203	0	-0.139648	0	0.0673828	0
-27.8	-0.013672	0	0.017578	0	-0.0332032	0	0.0371093	0	-0.130859	0	0.0761718	0
-27.7	-0.0205078	0	0.0185547	0	-0.0322266	0	0.0380859	0	-0.129883	0	0.0771484	0
-27.6	-0.0175781	0	0.0214844	0	-0.0292969	0	0.0410156	0	-0.126953	0	0.0722656	0
-27.5	-0.0126953	0	0.0146484	0	-0.0322266	0	0.0458984	0	-0.12207	0	0.0771484	0
-27.4	-0.0224609	0	0.0166016	0	-0.0302734	0	0.0478516	0	-0.120117	0	0.0791016	0
-27.3	-0.0195314	0	0.0195311	0	-0.0273439	0	0.0507811	0	-0.117188	0	0.0820311	0
-27.2	-0.0126953	0	0.0263672	0	-0.0205078	0	0.0498047	0	-0.12207	0	0.0771484	0
-27.1	-0.00976574	0	0.0292968	0	-0.0175782	0	0.0527343	0	-0.119141	0	0.080078	0
-27	-0.0136719	0	0.0332031	0	-0.0253906	0	0.0449219	0	-0.115234	0	0.0761719	0
-26.9	-0.0107422	0	0.0361328	0	-0.0224609	0	0.0361328	0	-0.112305	0	0.0791016	0
-26.8	-0.0107422	0	0.0283203	0	-0.0224609	0	0.0361328	0	-0.120117	0	0.0673828	0
-26.7	-0.00488281	0	0.0341797	0	-0.0166016	0	0.0537109	0	-0.114258	0	0.0732422	0
-26.6	-7.45058e-08	0	0.0390624	0	-0.0117188	0	0.0468749	0	-0.109375	0	0.0781249	0
-26.5	0	0	0.0273438	0	-0.0234375	0	0.046875	0	-0.109375	0	0.078125	0
-26.4	-0.0078125	0	0.03125	0	-0.0195313	0	0.0429688	0	-0.105469	0	0.0703125	0
-26.3	-0.00195324	0	0.0371093	0	-0.013672	0	0.048828	0	-0.0996095	0	0.0761718	0
-26.2	-0.00195313	0	0.0371094	0	-0.0214844	0	0.0488281	0	-0.0996094	0	0.0683594	0
-26.1	0.00292961	0	0.0302734	0	-0.0166016	0	0.0537109	0	-0.0947266	0	0.0732421	0
-26	0.00488281	0	0.0322266	0	-0.0146484	0	0.0556641	0	-0.104492	0	0.0751953	0
-25.9	0.00976551	0	0.0371093	0	-0.00976574	0	0.048828	0	-0.0996095	0	0.0683593	0
-25.8	0.00683594	0	0.0341797	0	-0.00488281	0	0.0458984	0	-0.0947266	0	0.0732422	0
-25.7	0.00683594	0	0.0341797	0	-0.0166016	0	0.0458984	0	-0.0947266	0	0.0732422	0
-25.6	0.0126953	0	0.0400391	0	-0.0107422	0	0.0517578	0	-0.0888672	0	0.0712891	0
-25.5	0.00488281	0	0.0439453	0	-0.00683594	0	0.0556641	0	-0.0849609	0	0.0751953	0
-25.4	0.00488281	0	0.0439453	0	-0.00683594	0	0.0556641	0	-0.0849609	0	0.0751953	0
-25.3	-1.19209e-07	0	0.0468749	0	-0.00390637	0	0.0468749	0	-0.0820314	0	0.0781249	0
-25.2	0.00585938	0	0.0527344	0	0.00195313	0	0.0527344	0	-0.0761719	0	0.0839844	0
-25.1	0.00585938	0	0.0410156	0	-0.00585938	0	0.0449219	0	-0.0761719	0	0.0839844	0
-25	0.000976563	0	0.0478516	0	0.00878906	0	0.0517578	0	-0.0693359	0	0.0908203	0
-24.9	0.00390625	0	0.0507813	0	0.00390625	0	0.0546875	0	-0.0546875	0	0.09375	0
-24.8	0.00683594	0	0.0458984	0	0.00683594	0	0.0576172	0	-0.0517578	0	0.0966797	0
-24.7	0.0117188	0	0.0507813	0	0.0117188	0	0.0625	0	-0.046875	0	0.101563	0
-24.6	0.00195313	0	0.0527344	0	0.0136719	0	0.0644531	0	-0.0566406	0	0.103516	0
-24.5	0.00195313	0	0.0410156	0	0.00195313	0	0.0644531	0	-0.0449219	0	0.103516	0
-24.4	0	0	0.046875	0	0.0078125	0	0.0703125	0	-0.0390625	0	0.109375	0
-24.3	0.00195301	0	0.048828	0	0.00976551	0	0.0722655	0	-0.0371095	0	0.0996093	0
-24.2	0.00195313	0	0.0488281	0	0.00976563	0	0.0722656	0	-0.0371094	0	0.0996094	0
-24.1	0.00195313	0	0.0488281	0	0.00195313	0	0.0722656	0	-0.0371094	0	0.0996094	0
-24	0.00683594	0	0.0537109	0	0.00683594	0	0.0771484	0	-0.0322266	0	0.104492	0
-23.9	0.00976563	0	0.0566406	0	0.00976563	0	0.0683594	0	-0.0214844	0	0.107422	0
-23.8	0.00976563	0	0.0566406	0	0.00976563	0	0.0683594	0	-0.0214844	0	0.107422	0
-23.7	0.00976563	0	0.0566406	0	0.00976563	0	0.0683594	0	-0.00976563	0	0.107422	0
-23.6	0.0175781	0	0.0566406	0	0.00976563	0	0.0683594	0	-0.00976563	0	0.107422	0
-23.5	0.0146484	0	0.0615234	0	0.0146484	0	0.0732422	0	0.00292969	0	0.112305	0
-23.4	0.0195314	0	0.0585939	0	0.0117189	0	0.0703126	0	0.0117189	0	0.109375	0
-23.3	0.0224609	0	0.0615234	0	0.0146484	0	0.0732422	0	0.0146484	0	0.112305	0
-23.2	0.0244141	0	0.0634766	0	0.0166016	0	0.0751953	0	0.0244141	0	0.114258	0
-23.1	0.0244141	0	0.0634766	0	0.0166016	0	0.0751953	0	0.0361328	0	0.114258	0
-23	0.0195313	0	0.0664063	0	0.0195313	0	0.078125	0	0.0390625	0	0.128906	0
-22.9	0.0244141	0	0.0634766	0	0.0244141	0	0.0751953	0	0.0361328	0	0.125977	0
-22.8	0.0273436	0	0.0664061	0	0.0273436	0	0.0781249	0	0.0507811	0	0.128906	0
-22.7	0.0253906	0	0.0566406	0	0.0253906	0	0.0761719	0	0.0566406	0	0.126953	0
-22.6	0.0224609	0	0.0537109	0	0.0224609	0	0.0732422	0	0.0654297	0	0.124023	0
-22.5	0.0224609	0	0.0537109	0	0.0224609	0	0.0654297	0	0.0732422	0	0.124023	0
-22.4	0.03125	0	0.0585938	0	0.0195313	0	0.0625	0	0.0703125	0	0.121094	0
-22.3	0.038086	0	0.053711	0	0.00683601	0	0.0458985	0	0.0654298	0	0.116211	0
-22.2	0.0302734	0	0.0458984	0	-0.000976563	0	0.0498047	0	0.0693359	0	0.108398	0
-22.1	0.0351563	0	0.0546875	0	-0.00390625	0	0.046875	0	0.0664063	0	0.105469	0
-22	0.0283203	0	0.0478516	0	-0.0107422	0	0.0400391	0	0.0595703	0	0.0986328	0
-21.9	0.0419923	0	0.0498048	0	-0.00878894	0	0.0341798	0	0.0615236	0	0.0927736	0
-21.8	0.0419922	0	0.0498047	0	-0.00878906	0	0.0224609	0	0.0615234	0	0.100586	0
-21.7	0.0527344	0	0.0488281	0	-0.00976563	0	0.0214844	0	0.0722656	0	0.0996094	0
-21.6	0.0468751	0	0.0429689	0	-0.00390613	0	0.0156251	0	0.0664064	0	0.0937501	0
-21.5	0.0439453	0	0.0400391	0	-0.00683594	0	0.0126953	0	0.0634766	0	0.0908203	0
-21.4	0.0468751	0	0.0468751	0	-0.00390613	0	0.0195314	0	0.0703126	0	0.0976564	0
-21.3	0.0546876	0	0.0429688	0	-0.00781243	0	0.0156251	0	0.0742188	0	0.0937501	0
-21.2	0.0517578	0	0.0400391	0	0.000976563	0	0.0126953	0	0.0712891	0	0.0908203	0
-21.1	0.0546876	0	0.0351564	0	-0.00390613	0	0.0156251	0	0.0664064	0	0.0937501	0
-21	0.0615234	0	0.0302734	0	-0.00878906	0	0.00292969	0	0.0732422	0	0.0888672	0
-20.9	0.0585938	0	0.0351563	0	-0.00390625	0	0.0078125	0	0.078125	0	0.0976563	0
-20.8	0.0585939	0	0.0351564	0	0.00781262	0	0.00781262	0	0.0898439	0	0.0976564	0
-20.7	0.0732422	0	0.0302734	0	0.00292969	0	0.00292969	0	0.0849609	0	0.0927734	0
-20.6	0.0664063	0	0.0234376	0	-0.00390618	0	-0.00390618	0	0.0859376	0	0.0859376	0
-20.5	0.0722656	0	0.0292969	0	-0.00976563	0	-0.00976563	0	0.0917969	0	0.0917969	0
-20.4	0.0722658	0	0.0214846	0	-0.00585919	0	-0.0175779	0	0.0839846	0	0.0839846	0
-20.3	0.0693359	0	0.0185547	0	-0.00878906	0	-0.00878906	0	0.0888672	0	0.0888672	0
-20.2	0.0693359	0	0.0185547	0	-0.0126953	0	-0.0126953	0	0.0771484	0	0.0888672	0
-20.1	0.0625002	0	0.0117189	0	-0.0195311	0	-0.0195311	0	0.0703127	0	0.0820314	0
-20	0.0625	0	0.0117188	0	-0.0273438	0	-0.0273438	0	0.0742188	0	0.0820313	0
-19.9	0.0664063	0	0.015625	0	-0.0234375	0	-0.0351563	0	0.0664063	0	0.0742188	0
-19.8	0.0712892	0	0.0166017	0	-0.0224608	0	-0.0302733	0	0.0595705	0	0.067383	0
-19.7	0.0732422	0	0.0107422	0	-0.0283203	0	-0.0361328	0	0.0654297	0	0.0615234	0
-19.6	0.0800782	0	0.0175782	0	-0.0332031	0	-0.0410156	0	0.0605469	0	0.0683594	0
-19.5	0.0966797	0	0.0146484	0	-0.0244141	0	-0.0439453	0	0.0654297	0	0.0654297	0
-19.4	0.0869142	0	0.004883	0	-0.0341795	0	-0.0458983	0	0.0556642	0	0.0556642	0
-19.3	0.0869142	0	0.00488292	0	-0.0419921	0	-0.0537108	0	0.0478517	0	0.0556642	0
-19.2	0.09375	0	0.0117188	0	-0.0390625	0	-0.0585938	0	0.0429688	0	0.0507813	0
-19.1	0.0976563	0	0.0078125	0	-0.03125	0	-0.0507813	0	0.0507813	0	0.046875	0
-19	0.0986328	0	-0.00292969	0	-0.0341797	0	-0.0615234	0	0.0478516	0	0.0478516	0
-18.9	0.0966798	0	0.0029298	0	-0.024414	0	-0.0634765	0	0.0458985	0	0.0458985	0
-18.8	0.0917969	0	-0.00195305	0	-0.0175781	0	-0.0683593	0	0.0410157	0	0.0410157	0
-18.7	0.100586	0	0.00683594	0	-0.0205078	0	-0.0712891	0	0.0498047	0	0.0380859	0
-18.6	0.0927736	0	-0.000976376	0	-0.0205076	0	-0.0712889	0	0.0419924	0	0.0302736	0
-18.5	0.0986328	0	0.00878906	0	-0.0107422	0	-0.0615234	0	0.0400391	0	0.0283203	0
-18.4	0.0957032	0	0.00585949	0	-0.0136718	0	-0.064453	0	0.044922	0	0.0332032	0
-18.3	0.101563	0	0.00781257	0	-0.0195312	0	-0.0585937	0	0.0390626	0	0.0273438	0
-18.2	0.0986328	0	0.00488281	0	-0.0224609	0	-0.0615234	0	0.0361328	0	0.0244141	0
-18.1	0.0927735	0	0.0107423	0	-0.0283202	0	-0.0673827	0	0.0302735	0	0.0302735	0
-18	0.0976563	0	0.0078125	0	-0.0234375	0	-0.0703125	0	0.0273438	0	0.0273438	0
-17.9	0.0957032	0	0.00585949	0	-0.0253905	0	-0.0722655	0	0.0371095	0	0.0253907	0
-17.8	0.101563	0	0	0	-0.0195313	0	-0.0703125	0	0.03125	0	0.0195313	0
-17.7	0.0996094	0	0.00585938	0	-0.0214844	0	-0.0722656	0	0.0292969	0	0.0175781	0
-17.6	0.0849609	0	0.00292969	0	-0.0244141	0	-0.0751953	0	0.0263672	0	0.0146484	0
-17.5	0.0849609	0	0.00292969	0	-0.0166016	0	-0.0751953	0	0.0263672	0	0.0146484	0
-17.4	0.0917969	0	-0.00195313	0	-0.0214844	0	-0.0800781	0	0.0214844	0	0.00976563	0
-17.3	0.0781251	0	0.00781257	0	-0.0117187	0	-0.0703124	0	0.0195313	0	0.00781257	0
-17.2	0.0722656	0	0.00195313	0	-0.0175781	0	-0.0761719	0	0.0136719	0	0.0136719	0
-17.1	0.0703125	0	0	0	-0.0117188	0	-0.0703125	0	0.0117188	0	0.0117188	0
-17	0.0625	0	0	0	-0.0117188	0	-0.0703125	0	0	0	0.0195313	0
-16.9	0.0595704	0	-0.0146483	0	-0.0146483	0	-0.0732421	0	-0.00292958	0	0.00878917	0
-16.8	0.0556641	0	-0.0185546	0	-0.0185546	0	-0.0654296	0	-0.00683586	0	0.0126954	0
-16.7	0.0527344	0	-0.0214844	0	-0.00976563	0	-0.0683594	0	0.00195313	0	0.00976563	0
-16.6	0.0498048	0	-0.0126952	0	-0.0126952	0	-0.0634765	0	-0.000976451	0	0.00683605	0
-16.5	0.0498047	0	-0.0126953	0	-0.0126953	0	-0.0634766	0	-0.000976563	0	0.00683594	0
-16.4	0.0576172	0	-0.0126953	0	-0.0126953	0	-0.0517578	0	-0.000976563	0	0.00683594	0
-16.3	0.0556641	0	-0.0146484	0	-0.0146484	0	-0.0537109	0	-0.00292969	0	0.00488281	0
-16.2	0.0527344	0	-0.0175781	0	-0.0175781	0	-0.0566406	0	-0.00585938	0	0.0136719	0
-16.1	0.0644531	0	-0.0175781	0	-0.0175781	0	-0.0566406	0	-0.00585938	0	0.0136719	0
-16	0.0625	0	-0.0195313	0	-0.0195313	0	-0.0585938	0	-0.0078125	0	0.0117188	0
-15.9	0.0625	0	-0.0195313	0	-0.0078125	0	-0.0585938	0	-0.0078125	0	0.0117188	0
-15.8	0.0595703	0	-0.0224609	0	-0.0107422	0	-0.0615234	0	-0.0107422	0	0.00878906	0
-15.7	0.0595703	0	-0.0224609	0	-0.00292969	0	-0.0498047	0	-0.0107422	0	0.00878906	0
-15.6	0.0625	0	-0.0195313	0	0	0	-0.046875	0	-0.0078125	0	0.0117188	0
-15.5	0.0595703	0	-0.0146484	0	-0.00292969	0	-0.0419922	0	-0.0107422	0	0.00878906	0
-15.4	0.0644532	0	-0.017578	0	-0.00585926	0	-0.0449218	0	-0.0136718	0	0.013672	0
-15.3	0.0644531	0	-0.00585938	0	0.00585938	0	-0.0449219	0	-0.0136719	0	0.00585938	0
-15.2	0.0664063	0	-0.00390625	0	0.0078125	0	-0.0429688	0	-0.0234375	0	0.0078125	0
-15.1	0.0615234	0	-0.00878906	0	0.0107422	0	-0.0478516	0	-0.0166016	0	0.00292969	0
-15	0.0615234	0	-0.00878906	0	0.00292969	0	-0.0478516	0	-0.0166016	0	0.00292969	0
-14.9	0.064453	0	-0.00585949	0	0.00585926	0	-0.044922	0	-0.0253907	0	0.00585926	0
-14.8	0.0644531	0	-0.00585938	0	0.00585938	0	-0.0449219	0	-0.0253906	0	0.00585938	0
-14.7	0.0566406	0	-0.00585938	0	0.0136719	0	-0.0449219	0	-0.0136719	0	0.0136719	0
-14.6	0.0546875	0	-0.0078125	0	0.0117188	0	-0.046875	0	-0.0273438	0	0.00390625	0
-14.5	0.0517578	0	-0.0107422	0	0.00878906	0	-0.0498047	0	-0.0302734	0	0.000976563	0
-14.4	0.0429688	0	-0.0078125	0	0.00390625	0	-0.0546875	0	-0.0273438	0	-0.0078125	0
-14.3	0.0400391	0	-0.0107422	0	0.000976563	0	-0.0498047	0	-0.0302734	0	-0.0107422	0
-14.2	0.0400391	0	-0.0107422	0	0.000976563	0	-0.0576172	0	-0.0302734	0	-0.0107422	0
-14.1	0.0400391	0	-0.0107422	0	0.00878906	0	-0.0498047	0	-0.0302734	0	-0.0107422	0
-14	0.0400391	0	-0.0107422	0	0.00878906	0	-0.0498047	0	-0.0302734	0	-0.0107422	0
-13.9	0.0351563	0	-0.0078125	0	0.00390625	0	-0.0546875	0	-0.0273438	0	-0.0078125	0
-13.8	0.0380858	0	-0.00488292	0	0.00683583	0	-0.0517579	0	-0.0244142	0	-0.00488292	0
-13.7	0.0380859	0	-0.00488281	0	0.00683594	0	-0.0439453	0	-0.0126953	0	-0.00488281	0
-13.6	0.0371093	0	-0.00585945	0	0.0058593	0	-0.0449219	0	-0.0253907	0	-0.00585945	0
-13.5	0.0283203	0	-0.00292969	0	0.0166016	0	-0.0419922	0	-0.0224609	0	-0.0107422	0
-13.4	0.0283203	0	-0.00292969	0	0.00878906	0	-0.0419922	0	-0.0302734	0	-0.00292969	0
-13.3	0.0283203	0	-0.00292969	0	0.00878906	0	-0.0419922	0	-0.0302734	0	-0.00292969	0
-13.2	0.0205078	0	-0.00292969	0	0.00878906	0	-0.0302734	0	-0.0419922	0	-0.0107422	0
-13.1	0.0234374	0	-1.11759e-07	0	0.0117186	0	-0.0195314	0	-0.0390626	0	-0.00781261	0
-13	0.0117188	0	0	0	0.0117188	0	-0.0273438	0	-0.0390625	0	-0.0078125	0
-12.9	0.0117188	0	0	0	0.0117188	0	-0.0273438	0	-0.0390625	0	-0.0078125	0
-12.8	0.0117188	0	0	0	0.0117188	0	-0.0273438	0	-0.0390625	0	0	0
-12.7	0.0136719	0	0.00195313	0	0.0136719	0	-0.0253906	0	-0.0371094	0	0.00195313	0
-12.6	0.00195313	0	0.00195313	0	0.0136719	0	-0.0253906	0	-0.0371094	0	0.00195313	0
-12.5	-0.00585938	0	-0.00976563	0	0.0136719	0	-0.0253906	0	-0.0371094	0	0.00195313	0
-12.4	-0.00390625	0	-0.0078125	0	0.015625	0	-0.0234375	0	-0.0351563	0	0.00390625	0
-12.3	-0.000976674	0	-0.00488292	0	0.0185546	0	-0.0205079	0	-0.0322267	0	0.00683583	0
-12.2	0.00195313	0	-0.00976563	0	0.00976563	0	-0.0175781	0	-0.0292969	0	0.00976563	0
-12.1	0.00195313	0	-0.00976563	0	0.00976563	0	-0.0175781	0	-0.0292969	0	0.00976563	0
-12	-0.0078125	0	-0.0078125	0	0.0117188	0	-0.015625	0	-0.0273438	0	0.0117188	0
-11.9	-0.00488281	0	-0.00488281	0	0.0146484	0	-0.0126953	0	-0.0244141	0	0.00683594	0
-11.8	-0.00292969	0	-0.00292969	0	0.0166016	0	-0.0107422	0	-0.0224609	0	0.00878906	0
-11.7	-0.00195313	0	-0.00195313	0	0.0175781	0	-0.00976563	0	-0.0214844	0	0.00976563	0
-11.6	-0.00195313	0	-0.00195313	0	0.00976563	0	-0.0214844	0	-0.0214844	0	0.00976563	0
-11.5	-0.00585938	0	-0.00976563	0	0.0136719	0	-0.0175781	0	-0.0175781	0	0.0136719	0
-11.4	-0.0029298	0	-0.00683605	0	0.0048827	0	-0.0146485	0	-0.0146485	0	0.0166015	0
-11.3	-0.000976563	0	-0.00488281	0	0.00683594	0	-0.0126953	0	-0.0126953	0	0.0185547	0
-11.2	0.00488281	0	0.000976563	0	0.0126953	0	-0.00683594	0	-0.00683594	0	0.0126953	0
-11.1	-0.00488289	0	0.00292961	0	0.00292961	0	-0.0126954	0	-0.00488289	0	0.0146484	0
-11	-0.00195313	0	0.00585938	0	0.0175781	0	-0.00976563	0	-0.00195313	0	0.0175781	0
-10.9	0	0	0.0078125	0	0.0078125	0	-0.0078125	0	-0.0078125	0	0.0195313	0
-10.8	0	0	0.0078125	0	0.0078125	0	-0.0195313	0	-0.0078125	0	0.0195313	0
-10.7	0.00292969	0	0.0107422	0	0.00292969	0	-0.00488281	0	-0.00488281	0	0.0224609	0
-10.6	0.00292958	0	0.0107421	0	0.00292958	0	-0.00488292	0	-0.00488292	0	0.0224608	0
-10.5	0	0	0.015625	0	0.0078125	0	-0.0117188	0	0.0078125	0	0.0273438	0
-10.4	0	0	0.015625	0	-0.00390625	0	-0.0117188	0	0	0	0.015625	0
-10.3	0.00195313	0	0.0175781	0	-0.00195313	0	-0.00976563	0	0.00195313	0	0.0175781	0
-10.2	-0.00683594	0	0.0205078	0	0.000976563	0	-0.00683594	0	0.00488281	0	0.0126953	0
-10.1	-0.00683594	0	0.0205078	0	-0.00683594	0	-0.00683594	0	0.00488281	0	0.0126953	0
-10	-0.00390625	0	0.015625	0	-0.00390625	0	-0.00390625	0	0.0078125	0	0.015625	0
-9.9	-0.00683601	0	0.0205077	0	0.000976488	0	0.000976488	0	0.0126952	0	0.0205077	0
-9.8	-0.00683594	0	0.0205078	0	0.000976563	0	0.000976563	0	0.000976563	0	0.00878906	0
-9.7	-0.015625	0	0.0117188	0	-0.0078125	0	0.00390625	0	0.00390625	0	0.0117188	0
-9.6	-0.015625	0	0.0117188	0	-0.0078125	0	0.00390625	0	0.00390625	0	0.0117188	0
-9.5	-0.0107422	0	0.0166016	0	-0.00292969	0	0.00878906	0	0.00878906	0	0.0166016	0
-9.4	-0.0107422	0	0.00878906	0	-0.0107422	0	0.00878906	0	0.00878906	0	0.0166016	0
-9.3	-0.0205078	0	0.0107422	0	-0.00878906	0	0.0107422	0	0.0107422	0	0.0107422	0
-9.2	-0.0283203	0	0.0107422	0	-0.0205078	0	0.0107422	0	0.0107422	0	0.0107422	0
-9.1	-0.0283203	0	0.0107422	0	-0.0205078	0	0.0107422	0	0.0107422	0	0.0107422	0
-9	-0.0224609	0	0.00488281	0	-0.0224609	0	0.0166016	0	0.0166016	0	0.0166016	0
-8.9	-0.0341797	0	0.00488281	0	-0.0224609	0	0.00488281	0	0.0166016	0	0.00488281	0
-8.8	-0.03125	0	0.0078125	0	-0.0195313	0	0.0078125	0	0.0195313	0	0.0078125	0
-8.7	-0.03125	0	0.0078125	0	-0.0195313	0	0.0078125	0	0.0195313	0	0.0078125	0
-8.6	-0.0292969	0	0.00976563	0	-0.0292969	0	0.00976563	0	0.0136719	0	0.00976563	0
-8.5	-0.0263672	0	0.0126953	0	-0.0263672	0	0.0244141	0	0.0166016	0	0.0126953	0
-8.4	-0.0341797	0	0.000976563	0	-0.0263672	0	0.0126953	0	0.0166016	0	0.0126953	0
-8.3	-0.0341797	0	0.000976563	0	-0.0263672	0	0.0126953	0	0.0166016	0	0.0126953	0
-8.2	-0.0419922	0	0.00488281	0	-0.0224609	0	0.0166016	0	0.0205078	0	0.00878906	0
-8.1	-0.0419922	0	-0.00292969	0	-0.0224609	0	0.0166016	0	0.0205078	0	0.00878906	0
-8	-0.0371094	0	0.00195313	0	-0.0175781	0	0.0214844	0	0.0136719	0	0.0136719	0
-7.9	-0.0341797	0	0.00488281	0	-0.0146484	0	0.0244141	0	0.0166016	0	0.00488281	0
-7.8	-0.0341797	0	0.00488281	0	-0.0146484	0	0.0166016	0	0.0166016	0	0.00488281	0
-7.7	-0.0371094	0	-0.00195313	0	-0.00976563	0	0.0214844	0	0.0214844	0	0.00976563	0
-7.6	-0.0371094	0	-0.00195313	0	-0.00976563	0	0.0214844	0	0.0214844	0	0.00195313	0
-7.5	-0.0322266	0	-0.00488281	0	-0.0166016	0	0.0263672	0	0.0263672	0	-0.00488281	0
-7.4	-0.029297	0	-0.00195324	0	-0.013672	0	0.017578	0	0.017578	0	-0.00195324	0
-7.3	-0.0292969	0	-0.00195313	0	-0.0136719	0	0.0175781	0	0.0175781	0	-0.00195313	0
-7.2	-0.0371094	0	0.00195313	0	-0.00976563	0	0.0214844	0	0.0136719	0	-0.00976563	0
-7.1	-0.0341797	0	-0.00683594	0	-0.00683594	0	0.0244141	0	0.0166016	0	-0.0146484	0
-7	-0.0322266	0	-0.00488281	0	-0.00488281	0	0.0263672	0	0.0185547	0	-0.0126953	0
-6.9	-0.0146484	0	0.000976563	0	0.000976563	0	0.0322266	0	0.0244141	0	-0.0185547	0
-6.8	-0.0292969	0	-0.00195313	0	-0.00195313	0	0.0292969	0	0.0214844	0	-0.0214844	0
-6.7	-0.0263672	0	-0.00683594	0	-0.00683594	0	0.0322266	0	0.0244141	0	-0.0185547	0
-6.6	-0.0234376	0	-0.00390636	0	-0.00390636	0	0.0351561	0	0.0273436	0	-0.0156251	0
-6.5	-0.0205078	0	-0.0126953	0	-0.000976563	0	0.0380859	0	0.0302734	0	-0.0205078	0
-6.4	-0.0166016	0	-0.00878906	0	0.00292969	0	0.0419922	0	0.0224609	0	-0.0166016	0
-6.3	-0.0166016	0	-0.00878906	0	0.00292969	0	0.0419922	0	0.0341797	0	-0.0166016	0
-6.2	-0.0146484	0	-0.00683594	0	-0.00683594	0	0.0361328	0	0.0244141	0	-0.0263672	0
-6.1	-0.0126953	0	-0.00488281	0	-0.00488281	0	0.0380859	0	0.0263672	0	-0.0244141	0
-6	-0.0126953	0	-0.00488281	0	-0.00488281	0	0.0380859	0	0.0263672	0	-0.0244141	0
-5.9	0.00195313	0	-0.00195313	0	-0.00195313	0	0.0410156	0	0.0292969	0	-0.0214844	0
-5.8	0.00195313	0	-0.00195313	0	-0.00976563	0	0.0292969	0	0.0214844	0	-0.0214844	0
-5.7	0.00488281	0	0.000976563	0	-0.00683594	0	0.0322266	0	0.0244141	0	-0.0263672	0
-5.6	0.0078125	0	0.00390625	0	-0.00390625	0	0.0351563	0	0.0273438	0	-0.0234375	0
-5.5	-0.00390625	0	0.00390625	0	-0.00390625	0	0.046875	0	0.0273438	0	-0.0234375	0
-5.4	-0.00195313	0	-0.00195313	0	-0.00195313	0	0.0488281	0	0.0292969	0	-0.0214844	0
-5.3	-0.00390625	0	-0.00390625	0	-0.00390625	0	0.046875	0	0.0273438	0	-0.0234375	0
-5.2	-0.00195313	0	-0.00195313	0	-0.00195313	0	0.0488281	0	0.0292969	0	-0.0332031	0
-5.1	-0.00195313	0	-0.00195313	0	-0.0136719	0	0.0488281	0	0.0292969	0	-0.0332031	0
-5	-0.000976563	0	-0.000976563	0	-0.0126953	0	0.0498047	0	0.0302734	0	-0.0322266	0
-4.9	-0.0078125	0	0.0117188	0	0.00390625	0	0.0625	0	0.0351563	0	-0.0273438	0
-4.8	0.0029298	0	0.0107423	0	0.0029298	0	0.0615235	0	0.0341798	0	-0.0361327	0
-4.7	0.00292969	0	0.0107422	0	0.00292969	0	0.0615234	0	0.0419922	0	-0.0283203	0
-4.6	0.000976563	0	0.000976563	0	0.00878906	0	0.0595703	0	0.0400391	0	-0.0185547	0
-4.5	0.00390625	0	0.00390625	0	0.0117188	0	0.0625	0	0.0429688	0	-0.015625	0
-4.4	0.00390625	0	0.00390625	0	0.0117188	0	0.0625	0	0.0429688	0	-0.015625	0
-4.3	0.00585938	0	0.00585938	0	0.0136719	0	0.0566406	0	0.0449219	0	-0.0136719	0
-4.2	0.00585938	0	0.00585938	0	0.0136719	0	0.0566406	0	0.0449219	0	-0.0253906	0
-4.1	0.0117188	0	0.0117188	0	0.0195313	0	0.0625	0	0.0507813	0	-0.0195313	0
-4	0.0117188	0	0.0117188	0	0.0195313	0	0.0703125	0	0.0429688	0	-0.0195313	0
-3.9	0.0146483	0	0.0146483	0	0.0341796	0	0.0732421	0	0.0458983	0	-0.0166017	0
-3.8	0.0253906	0	0.0136719	0	0.0332031	0	0.0722656	0	0.0527344	0	-0.0175781	0
-3.7	0.0253906	0	0.0136719	0	0.0332031	0	0.0722656	0	0.0644531	0	-0.0175781	0
-3.6	0.0341797	0	0.0146484	0	0.0341797	0	0.0732422	0	0.0654297	0	-0.0166016	0
-3.5	0.0263672	0	0.00683594	0	0.0263672	0	0.0654297	0	0.0654297	0	-0.0126953	0
-3.4	0.029297	0	0.00585949	0	0.0175782	0	0.0566407	0	0.0683595	0	-0.0136718	0
-3.3	0.022461	0	-0.00878895	0	0.0107423	0	0.0419923	0	0.053711	0	-0.00878895	0
-3.2	0.0283203	0	-0.0224609	0	0.0166016	0	0.0478516	0	0.0478516	0	-0.0146484	0
-3.1	0.0273438	0	-0.0429688	0	0.0273438	0	0.0585938	0	0.0390625	0	-0.0117188	0
-3	0.0244141	0	-0.0458984	0	0.0126953	0	0.0556641	0	0.0244141	0	-0.0263672	0
-2.9	0.013672	0	-0.0292968	0	0.013672	0	0.044922	0	0.0253907	0	-0.0292968	0
-2.8	0.0214843	0	-0.013672	0	0.00976551	0	0.048828	0	0.0292968	0	-0.0214845	0
-2.7	0.0078125	0	-0.0078125	0	0.00390625	0	0.0351563	0	0.0273438	0	-0.0234375	0
-2.6	0.00585945	0	0.0136719	0	-0.0058593	0	0.0253907	0	0.0253907	0	-0.0332031	0
-2.5	0.0136719	0	0.0292969	0	-0.00976563	0	0.0332031	0	0.0214844	0	-0.0292969	0
-2.4	0.00585949	0	0.0253907	0	-0.0136718	0	0.0253907	0	0.00585949	0	-0.033203	0
-2.3	-0.00976563	0	0.0292969	0	-0.0214844	0	0.0214844	0	0.00195313	0	-0.0488281	0
-2.2	-0.0195313	0	0.0390625	0	-0.0195313	0	0.0195313	0	0	0	-0.0390625	0
-2.1	-0.0253905	0	0.0410157	0	-0.017578	0	0.0332032	0	-0.00585926	0	-0.048828	0
-2	-0.0390625	0	0.0507813	0	-0.0195313	0	0.03125	0	-0.0078125	0	-0.0390625	0
-1.9	-0.0380858	0	0.0595705	0	-0.0302733	0	0.020508	0	-0.026367	0	-0.0498045	0
-1.8	-0.0292967	0	0.0996096	0	-0.00976545	0	0.0214846	0	-0.0292967	0	-0.0488279	0
-1.7	-0.03125	0	0.136719	0	0.0078125	0	0.0273438	0	-0.0507813	0	-0.0429688	0
-1.6	-0.047851	0	0.139649	0	-0.000975996	0	0.0107428	0	-0.047851	0	-0.047851	0
-1.5	-0.0107422	0	0.0673828	0	0.00878906	0	0.00878906	0	-0.0693359	0	-0.0615234	0
-1.4	-0.0253903	0	0.072266	0	0.0527347	0	0.0332035	0	-0.0761715	0	-0.0761715	0
-1.3	-0.0244136	0	0.0849614	0	0.116211	0	0.0458989	0	-0.0634761	0	-0.0244136	0
-1.2	0.015625	0	-0.015625	0	-0.09375	0	0.046875	0	-0.00390625	0	-0.0742188	0
-1.1	0.113282	0	-0.0468744	0	0.0937506	0	0.0742193	0	-0.0546869	0	-0.195312	0
-1	0.3125	0	-0.179688	0	0.132813	0	-0.0273438	0	-0.0976563	0	-0.226563	0
-0.900002	-0.255862	0	-0.486331	0	-0.166018	0	-0.0839869	0	-0.216799	0	-0.248049	0
-0.800003	-0.19239	0	-0.165046	0	-0.0244211	0	0.0263602	0	-0.102546	0	-0.0556711	0
-0.700001	-0.101563	0	-0.125	0	-0.0351563	0	0.0664063	0	-0.101563	0	-0.0117188	0
-0.600002	-0.0908208	0	-0.0634771	0	-0.000977099	0	0.0576167	0	-0.0712896	0	-0.0126958	0
-0.5	-0.0263672	0	-0.0576172	0	0.00488281	0	0.0947266	0	-0.0654297	0	0.0244141	0
-0.400002	0.00585949	0	-0.0253905	0	0.013672	0	0.134766	0	-0.0253905	0	0.013672	0
-0.300003	0.0175787	0	-0.0136713	0	0.0175787	0	0.115235	0	-0.0332026	0	0.0253912	0
-0.200001	0	0	-0.0625	0	-0.0117188	0	0.148438	0	-0.0429688	0	0.0273438	0
-0.100002	-0.0351557	0	0.0820318	0	-0.0585932	0	0.0937506	0	-0.0156244	0	-0.0468744	0
0	-0.305664	0	-0.125977	0	-0.145508	0	-0.0166016	0	-0.21582	0	-0.0166016	0
0.0999985	0.186521	14.91	2.16699	13.94	-0.172854	17.68	0.397459	36.58	12.4287	59.65	0.307615	95.81
0.199997	6.48633	14.9101	10.4043	13.94	4.00586	17.68	15.0059	36.5801	44.3262	59.6501	30.0566	95.8102
0.299999	14.0527	14.9101	14.041	13.9401	14.9121	17.68	31.252	36.5801	56.5645	59.6502	76.4121	95.8102
0.399998	15.9131	14.9101	15.3506	13.9401	18.2725	17.68	36.1318	36.5802	59.9053	59.6502	92.1514	95.8102
0.5	16.4004	14.9101	15.8184	13.9401	19.0996	17.6801	37.4707	36.5802	61.0996	59.6502	95.8691	95.8102
0.599998	16.3613	14.9102	16.0293	13.9401	19.5605	17.6801	38.0723	36.5802	61.3926	59.6502	96.7207	95.8102
0.699997	16.4727	14.9102	16.0586	13.9401	19.8203	17.6801	38.1602	36.5802	61.6406	59.6502	97.0195	95.8102
0.799999	16.4668	14.9102	16.0957	13.9401	19.8262	17.6801	38.1348	36.5802	61.7559	59.6502	97.1543	95.8102
0.899998	16.4707	14.9102	16.127	13.9401	19.8184	17.6801	38.1387	36.5802	61.8809	59.6502	97.1895	95.8102
1	16.4844	14.9102	16.1406	13.9402	19.7813	17.6801	38.1641	36.5802	61.875	59.6502	97.2227	95.8102
1.1	16.4766	14.9102	16.1445	13.9402	19.7578	17.6801	38.1875	36.5802	61.9063	59.6502	97.2148	95.8102
1.2	16.4688	14.9102	16.1445	13.9402	19.7461	17.6801	38.1992	36.5802	61.9102	59.6502	97.2188	95.8102
1.3	16.4648	14.9102	16.1523	13.9402	19.7227	17.6801	38.1914	36.5802	61.9141	59.6502	97.2227	95.8102
1.4	16.4473	14.9102	16.1543	13.9402	19.7051	17.6801	38.1855	36.5802	61.9277	59.6502	97.2363	95.8102
1.5	16.416	14.9102	16.1348	13.9402	19.6738	17.6801	38.1738	36.5802	61.9277	59.6502	97.2246	95.8102
1.6	16.4355	14.9102	16.1543	13.9402	19.6738	17.6801	38.1934	36.5802	61.9238	59.6502	97.2441	95.8102
1.7	16.4092	14.9102	16.1475	13.9402	19.667	17.6801	38.1904	36.5802	61.9209	59.6502	97.2295	95.8102
1.8	16.4082	14.9102	16.127	13.9402	19.6465	17.6801	38.1895	36.5802	61.9199	59.6502	97.2363	95.8102
1.9	16.3975	14.9102	16.1162	13.9402	19.6279	17.6802	38.167	36.5802	61.8975	59.6502	97.2373	95.8102
2	16.3643	14.9102	16.1104	13.9402	19.6221	17.6802	38.1533	36.5802	61.8916	59.6502	97.2314	95.8102
2.1	16.3564	14.9102	16.1143	13.9402	19.6064	17.6802	38.1455	36.5802	61.8955	59.6502	97.2549	95.8102
2.2	16.335	14.9102	16.1006	13.9402	19.5928	17.6802	38.1436	36.5802	61.874	59.6502	97.2529	95.8102
2.3	16.3096	14.9102	16.0908	13.9402	19.5791	17.6802	38.1416	36.5802	61.8721	59.6502	97.251	95.8102
2.4	16.292	14.9102	16.0771	13.9402	19.5615	17.6802	38.1318	36.5802	61.8506	59.6502	97.249	95.8102
2.5	16.2764	14.9102	16.0654	13.9402	19.5459	17.6802	38.1162	36.5802	61.8584	59.6502	97.2451	95.8102
2.6	16.2725	14.9102	16.0615	13.9402	19.542	17.6802	38.1006	36.5802	61.8506	59.6502	97.2412	95.8102
2.7	16.2705	14.9102	16.0479	13.9402	19.5283	17.6802	38.0791	36.5802	61.8486	59.6502	97.2471	95.8102
2.8	16.2598	14.9102	16.0371	13.9402	19.5059	17.6802	38.0879	36.5802	61.8379	59.6502	97.248	95.8102
2.9	16.248	14.9102	16.0176	13.9402	19.5059	17.6802	38.0879	36.5802	61.8262	59.6502	97.2559	95.8102
3	16.2422	14.9102	16.0195	13.9402	19.4922	17.6802	38.082	36.5802	61.8203	59.6502	97.25	95.8102
3.1	16.2451	14.9102	16.0146	13.9402	19.4834	17.6802	38.0771	36.5802	61.8271	59.6502	97.2451	95.8102
3.2	16.2441	14.9102	16.0137	13.9402	19.4746	17.6802	38.084	36.5802	61.8262	59.6502	97.2441	95.8102
3.3	16.2227	14.9102	16.0039	13.9402	19.4648	17.6802	38.0742	36.5802	61.8164	59.6502	97.2422	95.8102
3.4	16.2227	14.9102	15.9805	13.9402	19.4414	17.6802	38.0625	36.5802	61.793	59.6502	97.2422	95.8102
3.5	16.2139	14.9102	15.9717	13.9402	19.4326	17.6802	38.0537	36.5802	61.792	59.6502	97.2412	95.8102
3.6	16.1982	14.9102	15.9561	13.9402	19.4287	17.6802	38.0576	36.5802	61.7881	59.6502	97.249	95.8102
3.7	16.2012	14.9102	15.9473	13.9402	19.4199	17.6802	38.0488	36.5802	61.7793	59.6502	97.248	95.8102
3.8	16.1826	14.9102	15.9404	13.9402	19.4209	17.6802	38.042	36.5802	61.7725	59.6502	97.2412	95.8102
3.9	16.1797	14.9102	15.9297	13.9402	19.3984	17.6802	38.0313	36.5802	61.7695	59.6502	97.2383	95.8102
4	16.1729	14.9102	15.9229	13.9402	19.4033	17.6802	38.0127	36.5802	61.7627	59.6502	97.2432	95.8102
4.1	16.1777	14.9102	15.916	13.9402	19.3965	17.6802	38.0176	36.5802	61.7676	59.6502	97.2441	95.8102
4.2	16.1729	14.9102	15.8916	13.9402	19.3916	17.6802	38.0127	36.5802	61.7549	59.6502	97.2432	95.8102
4.3	16.1738	14.9102	15.8809	13.9402	19.3809	17.6802	38.0098	36.5802	61.7402	59.6502	97.2402	95.8102
4.4	16.1729	14.9102	15.8799	13.9402	19.3721	17.6802	38.0127	36.5802	61.7432	59.6502	97.2432	95.8102
4.5	16.1621	14.9102	15.8691	13.9402	19.3613	17.6802	38.002	36.5802	61.752	59.6502	97.2402	95.8102
4.6	16.1709	14.9102	15.8584	13.9402	19.3506	17.6802	37.9912	36.5802	61.7412	59.6502	97.2373	95.8102
4.7	16.1699	14.9102	15.8496	13.9402	19.3496	17.6802	37.9902	36.5802	61.7402	59.6502	97.2402	95.8102
4.8	16.168	14.9102	15.8359	13.9402	19.3477	17.6802	37.9883	36.5802	61.7383	59.6502	97.2266	95.8102
4.9	16.1631	14.9102	15.8115	13.9402	19.3428	17.6802	37.9834	36.5802	61.7334	59.6502	97.2217	95.8102
5	16.168	14.9102	15.8086	13.9402	19.3281	17.6802	37.9688	36.5802	61.7305	59.6502	97.2266	95.8102
5.1	16.168	14.9102	15.793	13.9402	19.3242	17.6802	37.9648	36.5802	61.7148	59.6502	97.2148	95.8102
5.2	16.1563	14.9102	15.7969	13.9402	19.3164	17.6802	37.957	36.5802	61.7188	59.6502	97.207	95.8102
5.3	16.1543	14.9102	15.7832	13.9402	19.3027	17.6802	37.9434	36.5802	61.7129	59.6502	97.2129	95.8102
5.4	16.1455	14.9102	15.7744	13.9402	19.3018	17.6802	37.9541	36.5802	61.7158	59.6502	97.2041	95.8102
5.5	16.1396	14.9102	15.7686	13.9402	19.2998	17.6802	37.9404	36.5802	61.71	59.6502	97.1982	95.8102
5.6	16.1455	14.9102	15.7549	13.9402	19.2939	17.6802	37.9346	36.5802	61.7158	59.6502	97.1963	95.8102
5.7	16.1338	14.9102	15.7432	13.9402	19.2939	17.6802	37.9229	36.5802	61.7041	59.6502	97.2041	95.8102
5.8	16.1416	14.9102	15.7314	13.9402	19.2822	17.6802	37.9111	36.5802	61.7041	59.6502	97.2002	95.8102
5.9	16.1367	14.9102	15.7227	13.9402	19.2734	17.6802	37.9141	36.5802	61.6953	59.6502	97.1953	95.8102
6	16.125	14.9102	15.7148	13.9402	19.2656	17.6802	37.9063	36.5802	61.6953	59.6502	97.1836	95.8102
6.1	16.1201	14.9102	15.71	13.9402	19.2607	17.6802	37.9014	36.5802	61.6826	59.6502	97.1826	95.8102
6.2	16.1143	14.9102	15.6924	13.9402	19.251	17.6802	37.8838	36.5802	61.6846	59.6502	97.1729	95.8102
6.3	16.1182	14.9102	15.6768	13.9402	19.2471	17.6802	37.8877	36.5802	61.6768	59.6502	97.165	95.8102
6.4	16.1045	14.9102	15.6709	13.9402	19.2334	17.6802	37.874	36.5802	61.6748	59.6502	97.1631	95.8102
6.5	16.1104	14.9102	15.6572	13.9402	19.2275	17.6802	37.8682	36.5802	61.6689	59.6502	97.1572	95.8102
6.6	16.1006	14.9102	15.6592	13.9402	19.2217	17.6802	37.8701	36.5802	61.6631	59.6502	97.1592	95.8102
6.7	16.084	14.9102	15.6426	13.9402	19.2129	17.6802	37.8535	36.5802	61.6543	59.6502	97.1543	95.8102
6.8	16.0781	14.9102	15.6328	13.9402	19.207	17.6802	37.8477	36.5802	61.6445	59.6502	97.1563	95.8102
6.9	16.0713	14.9102	15.6182	13.9402	19.2002	17.6802	37.8408	36.5802	61.6416	59.6502	97.1611	95.8102
7	16.0732	14.9102	15.6123	13.9402	19.1826	17.6802	37.8232	36.5802	61.6436	59.6502	97.1514	95.8102
7.1	16.0645	14.9102	15.6035	13.9402	19.1855	17.6802	37.8145	36.5802	61.627	59.6502	97.1465	95.8102
7.2	16.0596	14.9102	15.5869	13.9402	19.1768	17.6802	37.8174	36.5802	61.6182	59.6502	97.1494	95.8102
7.3	16.0645	14.9102	15.5801	13.9402	19.1738	17.6802	37.8027	36.5802	61.623	59.6502	97.1426	95.8102
7.4	16.0645	14.9102	15.5723	13.9402	19.1621	17.6802	37.8027	36.5802	61.6152	59.6502	97.1426	95.8102
7.5	16.0527	14.9102	15.5605	13.9402	19.1543	17.6802	37.7832	36.5802	61.6035	59.6502	97.1309	95.8102
7.6	16.0508	14.9102	15.5586	13.9402	19.1484	17.6802	37.7891	36.5802	61.5898	59.6502	97.1289	95.8102
7.7	16.0547	14.9102	15.5508	13.9402	19.1406	17.6802	37.7813	36.5802	61.582	59.6502	97.1211	95.8102
7.8	16.0459	14.9102	15.5459	13.9402	19.1357	17.6802	37.7764	36.5802	61.5771	59.6502	97.1162	95.8102
7.9	16.04	14.9102	15.5361	13.9402	19.1377	17.6802	37.7783	36.5802	61.5674	59.6502	97.1182	95.8102
8	16.042	14.9102	15.5303	13.9402	19.1201	17.6802	37.7686	36.5802	61.5615	59.6502	97.1084	95.8102
8.1	16.0303	14.9102	15.5068	13.9402	19.1201	17.6802	37.7607	36.5802	61.5498	59.6502	97.1084	95.8102
8.2	16.0215	14.9102	15.5098	13.9402	19.1113	17.6802	37.752	36.5802	61.5449	59.6502	97.1113	95.8102
8.3	16.0186	14.9102	15.499	13.9402	19.1084	17.6802	37.7295	36.5802	61.5303	59.6502	97.1006	95.8102
8.4	16.0137	14.9102	15.4824	13.9402	19.0918	17.6802	37.7246	36.5802	61.5254	59.6502	97.1035	95.8102
8.5	16.002	14.9102	15.4707	13.9402	19.0918	17.6802	37.7129	36.5802	61.5137	59.6502	97.0918	95.8102
8.6	16.002	14.9102	15.4629	13.9402	19.084	17.6802	37.7012	36.5802	61.502	59.6502	97.0918	95.8102
8.7	16.002	14.9102	15.4512	13.9402	19.084	17.6802	37.6934	36.5802	61.4941	59.6502	97.084	95.8102
8.8	16.0078	14.9102	15.4492	13.9402	19.0781	17.6802	37.6992	36.5802	61.4883	59.6502	97.0898	95.8102
8.9	16	14.9102	15.4375	13.9402	19.0664	17.6802	37.6875	36.5802	61.4805	59.6502	97.0781	95.8102
9	15.9883	14.9102	15.4375	13.9402	19.0664	17.6802	37.6797	36.5802	61.4805	59.6502	97.0781	95.8102
9.1	15.9932	14.9102	15.4307	13.9402	19.0635	17.6802	37.6846	36.5802	61.4736	59.6502	97.0713	95.8102
9.2	15.9854	14.9102	15.4229	13.9402	19.0635	17.6802	37.6729	36.5802	61.4658	59.6502	97.0635	95.8102
9.3	15.9727	14.9102	15.4102	13.9402	19.0508	17.6802	37.6641	36.5802	61.4531	59.6502	97.0625	95.8102
9.4	15.9727	14.9102	15.4023	13.9402	19.043	17.6802	37.6523	36.5802	61.4531	59.6502	97.0508	95.8102
9.5	15.96	14.9102	15.3857	13.9402	19.0381	17.6802	37.6396	36.5802	61.4287	59.6502	97.0381	95.8102
9.6	15.9512	14.9102	15.3887	13.9402	19.0293	17.6802	37.6426	36.5802	61.4316	59.6502	97.0293	95.8102
9.7	15.9531	14.9102	15.3828	13.9402	19.0313	17.6802	37.6328	36.5802	61.4219	59.6502	97.0313	95.8102
9.8	15.9395	14.9102	15.3691	13.9402	19.0215	17.6802	37.6309	36.5802	61.4121	59.6502	97.0293	95.8102
9.9	15.9316	14.9102	15.3691	13.9402	19.0215	17.6802	37.6191	36.5802	61.4004	59.6502	97.0215	95.8102
10	15.9336	14.9102	15.3594	13.9402	19.0117	17.6802	37.6133	36.5802	61.4023	59.6502	97.0234	95.8102
10.1	15.9229	14.9102	15.3525	13.9402	19.0127	17.6802	37.6143	36.5802	61.3955	59.6502	97.0127	95.8102
10.2	15.9375	14.9102	15.3438	13.9402	19.0078	17.6802	37.6055	36.5802	61.3867	59.6502	97.0156	95.8102
10.3	15.9248	14.9102	15.335	13.9402	19.0068	17.6802	37.6045	36.5802	61.3662	59.6502	97.0146	95.8102
10.4	15.9258	14.9102	15.3359	13.9402	18.9961	17.6802	37.5977	36.5802	61.3672	59.6502	97.0078	95.8102
10.5	15.9258	14.9102	15.3242	13.9402	18.9961	17.6802	37.5859	36.5802	61.3555	59.6502	96.9961	95.8102
10.6	15.9199	14.9102	15.3184	13.9402	18.9863	17.6802	37.5879	36.5802	61.3496	59.6502	96.998	95.8102
10.7	15.9053	14.9102	15.3037	13.9402	18.9756	17.6802	37.5654	36.5802	61.3467	59.6502	96.9834	95.8102
10.8	15.9023	14.9102	15.293	13.9402	18.9727	17.6802	37.5625	36.5802	61.332	59.6502	96.9805	95.8102
10.9	15.8945	14.9102	15.2813	13.9402	18.9727	17.6802	37.5625	36.5802	61.3242	59.6502	96.9805	95.8102
11	15.8828	14.9102	15.2695	13.9402	18.9609	17.6802	37.5508	36.5802	61.3242	59.6502	96.9727	95.8102
11.1	15.873	14.9102	15.2598	13.9402	18.959	17.6802	37.5488	36.5802	61.3105	59.6502	96.9707	95.8102
11.2	15.876	14.9102	15.2627	13.9402	18.9619	17.6802	37.5518	36.5802	61.3135	59.6502	96.9736	95.8102
11.3	15.8594	14.9102	15.2461	13.9402	18.9492	17.6802	37.5469	36.5802	61.3086	59.6502	96.957	95.8102
11.4	15.8672	14.9102	15.2461	13.9402	18.957	17.6802	37.5469	36.5802	61.3086	59.6502	96.9648	95.8102
11.5	15.8525	14.9102	15.2432	13.9402	18.9424	17.6802	37.5439	36.5802	61.2939	59.6502	96.9619	95.8102
11.6	15.8447	14.9102	15.2314	13.9402	18.9424	17.6802	37.5439	36.5802	61.2939	59.6502	96.9541	95.8102
11.7	15.8447	14.9102	15.2236	13.9402	18.9346	17.6802	37.5322	36.5802	61.2861	59.6502	96.9424	95.8102
11.8	15.8428	14.9102	15.2217	13.9402	18.9326	17.6802	37.5303	36.5802	61.2725	59.6502	96.9404	95.8102
11.9	15.8428	14.9102	15.21	13.9402	18.9209	17.6802	37.5303	36.5802	61.2725	59.6502	96.9326	95.8102
12	15.8311	14.9102	15.2021	13.9402	18.9209	17.6802	37.5225	36.5802	61.2607	59.6502	96.9209	95.8102
12.1	15.8203	14.9102	15.1992	13.9402	18.918	17.6802	37.5195	36.5802	61.25	59.6502	96.918	95.8102
12.2	15.8027	14.9102	15.1816	13.9402	18.9121	17.6802	37.5137	36.5802	61.2441	59.6502	96.9121	95.8102
12.3	15.8008	14.9102	15.168	13.9402	18.8984	17.6802	37.5117	36.5802	61.2305	59.6502	96.8906	95.8102
12.4	15.793	14.9102	15.1602	13.9402	18.8984	17.6802	37.5	36.5802	61.2305	59.6502	96.8906	95.8102
12.5	15.7803	14.9102	15.1592	13.9402	18.8896	17.6802	37.499	36.5802	61.2295	59.6502	96.8896	95.8102
12.6	15.7744	14.9102	15.1416	13.9402	18.8838	17.6802	37.4932	36.5802	61.2158	59.6502	96.8838	95.8102
12.7	15.7744	14.9102	15.1338	13.9402	18.8721	17.6802	37.4932	36.5802	61.2158	59.6502	96.8838	95.8102
12.8	15.7764	14.9102	15.124	13.9402	18.8662	17.6802	37.4951	36.5802	61.2061	59.6502	96.8857	95.8102
12.9	15.7598	14.9102	15.1191	13.9402	18.8613	17.6802	37.4824	36.5802	61.2012	59.6502	96.8691	95.8102
13	15.7598	14.9102	15.1191	13.9402	18.8496	17.6802	37.4824	36.5802	61.2012	59.6502	96.8809	95.8102
13.1	15.749	14.9102	15.1084	13.9402	18.8467	17.6802	37.4795	36.5802	61.1904	59.6502	96.8662	95.8102
13.2	15.749	14.9102	15.0967	13.9402	18.8389	17.6802	37.4795	36.5802	61.1787	59.6502	96.8662	95.8102
13.3	15.7373	14.9102	15.085	13.9402	18.8389	17.6802	37.4678	36.5802	61.1787	59.6502	96.8662	95.8102
13.4	15.7275	14.9102	15.0752	13.9402	18.8252	17.6802	37.4658	36.5802	61.1768	59.6502	96.8564	95.8102
13.5	15.7256	14.9102	15.0732	13.9402	18.8232	17.6802	37.4756	36.5802	61.1631	59.6502	96.8545	95.8102
13.6	15.7256	14.9102	15.0615	13.9402	18.8154	17.6802	37.4639	36.5802	61.1553	59.6502	96.8545	95.8102
13.7	15.7109	14.9102	15.0508	13.9402	18.8008	17.6802	37.4609	36.5802	61.1406	59.6502	96.8516	95.8102
13.8	15.7109	14.9102	15.0508	13.9402	18.8008	17.6802	37.4727	36.5802	61.1328	59.6502	96.8516	95.8102
13.9	15.6855	14.9102	15.0449	13.9402	18.7949	17.6802	37.4551	36.5802	61.127	59.6502	96.8535	95.8102
14	15.6836	14.9102	15.0313	13.9402	18.7813	17.6802	37.4531	36.5802	61.1133	59.6502	96.8438	95.8102
14.1	15.6758	14.9102	15.0234	13.9402	18.7813	17.6802	37.4531	36.5802	61.1133	59.6502	96.8438	95.8102
14.2	15.6699	14.9102	15.0059	13.9402	18.7676	17.6802	37.4473	36.5802	61.1074	59.6502	96.8379	95.8102
14.3	15.6611	14.9102	15.0088	13.9402	18.7705	17.6802	37.4502	36.5802	61.1025	59.6502	96.8408	95.8102
14.4	15.6563	14.9102	14.9961	13.9402	18.7539	17.6802	37.4453	36.5802	61.0859	59.6502	96.8359	95.8102
14.5	15.6563	14.9102	14.9844	13.9402	18.7461	17.6802	37.4453	36.5802	61.0859	59.6502	96.8359	95.8102
14.6	15.6426	14.9102	14.9824	13.9402	18.7441	17.6802	37.4434	36.5802	61.0762	59.6502	96.834	95.8102
14.7	15.6299	14.9102	14.9658	13.9402	18.7393	17.6802	37.4385	36.5802	61.0596	59.6502	96.8291	95.8102
14.8	15.6279	14.9102	14.9561	13.9402	18.7256	17.6802	37.4287	36.5802	61.0459	59.6502	96.8271	95.8102
14.9	15.6279	14.9102	14.9561	13.9402	18.7256	17.6802	37.4287	36.5802	61.0459	59.6502	96.8271	95.8102
15	15.625	14.9102	14.9414	13.9402	18.7227	17.6802	37.4258	36.5802	61.0352	59.6502	96.832	95.8102
15.1	15.6104	14.9102	14.9307	13.9402	18.7197	17.6802	37.4229	36.5802	61.04	59.6502	96.8213	95.8102
15.2	15.5977	14.9102	14.9258	13.9402	18.707	17.6802	37.418	36.5802	61.0273	59.6502	96.8164	95.8102
15.3	15.5928	14.9102	14.9092	13.9402	18.6904	17.6802	37.4131	36.5802	61.0225	59.6502	96.8115	95.8102
15.4	15.5928	14.9102	14.9014	13.9402	18.6904	17.6802	37.4131	36.5802	61.0225	59.6502	96.8115	95.8102
15.5	15.5781	14.9102	14.8984	13.9402	18.6797	17.6802	37.3984	36.5802	61.0078	59.6502	96.8086	95.8102
15.6	15.5752	14.9102	14.8838	13.9402	18.6768	17.6802	37.3955	36.5802	60.9971	59.6502	96.8057	95.8102
15.7	15.5703	14.9102	14.8789	13.9402	18.6602	17.6802	37.3906	36.5802	60.9922	59.6502	96.8008	95.8102
15.8	15.5576	14.9102	14.874	13.9402	18.6553	17.6802	37.3857	36.5802	60.9756	59.6502	96.7959	95.8102
15.9	15.5537	14.9102	14.8623	13.9402	18.6514	17.6802	37.3936	36.5802	60.9717	59.6502	96.792	95.8102
16	15.5391	14.9102	14.8594	13.9402	18.6367	17.6802	37.3789	36.5802	60.9609	59.6502	96.7891	95.8102
16.1	15.5391	14.9102	14.8477	13.9402	18.6289	17.6802	37.3789	36.5802	60.9609	59.6502	96.7891	95.8102
16.2	15.5361	14.9102	14.8447	13.9402	18.626	17.6802	37.3643	36.5802	60.9463	59.6502	96.7861	95.8102
16.3	15.5283	14.9102	14.8447	13.9402	18.6143	17.6802	37.3643	36.5802	60.9463	59.6502	96.7861	95.8102
16.4	15.5205	14.9102	14.8252	13.9402	18.6064	17.6802	37.3486	36.5802	60.9307	59.6502	96.7783	95.8102
16.5	15.5137	14.9102	14.8105	13.9402	18.5918	17.6802	37.3418	36.5802	60.9238	59.6502	96.7715	95.8102
16.6	15.5088	14.9102	14.8057	13.9402	18.5869	17.6802	37.3369	36.5802	60.9072	59.6502	96.7666	95.8102
16.7	15.5088	14.9102	14.8057	13.9402	18.5752	17.6802	37.3369	36.5802	60.9072	59.6502	96.7666	95.8102
16.8	15.4912	14.9102	14.7881	13.9402	18.5693	17.6802	37.3311	36.5802	60.8896	59.6502	96.7607	95.8102
16.9	15.4912	14.9102	14.7881	13.9402	18.5693	17.6802	37.3193	36.5802	60.8896	59.6502	96.7686	95.8102
17	15.4912	14.9102	14.7803	13.9402	18.5615	17.6802	37.3193	36.5802	60.8818	59.6502	96.7686	95.8102
17.1	15.4834	14.9102	14.7725	13.9402	18.542	17.6802	37.3037	36.5802	60.8623	59.6502	96.7725	95.8102
17.2	15.4697	14.9102	14.7588	13.9402	18.54	17.6802	37.3018	36.5802	60.8604	59.6502	96.7705	95.8102
17.3	15.4697	14.9102	14.7588	13.9402	18.54	17.6802	37.3096	36.5802	60.8525	59.6502	96.7705	95.8102
17.4	15.4619	14.9102	14.7432	13.9402	18.5205	17.6802	37.2939	36.5802	60.8447	59.6502	96.7627	95.8102
17.5	15.4482	14.9102	14.7373	13.9402	18.5146	17.6802	37.2881	36.5802	60.8271	59.6502	96.7568	95.8102
17.6	15.4424	14.9102	14.7197	13.9402	18.5088	17.6802	37.2822	36.5802	60.8213	59.6502	96.751	95.8102
17.7	15.4482	14.9102	14.7178	13.9402	18.499	17.6802	37.2803	36.5802	60.8115	59.6502	96.7568	95.8102
17.8	15.4316	14.9102	14.709	13.9402	18.4902	17.6802	37.2715	36.5802	60.8027	59.6502	96.748	95.8102
17.9	15.4287	14.9102	14.6943	13.9402	18.4756	17.6802	37.2686	36.5802	60.7998	59.6502	96.7451	95.8102
18	15.4219	14.9102	14.6875	13.9402	18.4688	17.6802	37.2617	36.5802	60.7813	59.6502	96.7383	95.8102
18.1	15.416	14.9102	14.6738	13.9402	18.4551	17.6802	37.2559	36.5802	60.7754	59.6502	96.7324	95.8102
18.2	15.4141	14.9102	14.6719	13.9402	18.4531	17.6802	37.2539	36.5802	60.7617	59.6502	96.7305	95.8102
18.3	15.4141	14.9102	14.6602	13.9402	18.4414	17.6802	37.2539	36.5802	60.7539	59.6502	96.7305	95.8102
18.4	15.4082	14.9102	14.6543	13.9402	18.4355	17.6802	37.248	36.5802	60.748	59.6502	96.7246	95.8102
18.5	15.4043	14.9102	14.6426	13.9402	18.4316	17.6802	37.252	36.5802	60.7324	59.6502	96.7207	95.8102
18.6	15.4014	14.9102	14.6396	13.9402	18.4287	17.6802	37.2412	36.5802	60.7217	59.6502	96.71	95.8102
18.7	15.3955	14.9102	14.6338	13.9402	18.415	17.6802	37.2354	36.5802	60.7158	59.6502	96.7119	95.8102
18.8	15.3926	14.9102	14.6191	13.9402	18.4121	17.6802	37.2324	36.5802	60.7129	59.6502	96.709	95.8102
18.9	15.3867	14.9102	14.6133	13.9402	18.4063	17.6802	37.2266	36.5802	60.707	59.6502	96.7031	95.8102
19	15.3779	14.9102	14.6045	13.9402	18.3857	17.6802	37.2061	36.5802	60.6865	59.6502	96.6865	95.8102
19.1	15.3799	14.9102	14.6064	13.9402	18.3877	17.6802	37.208	36.5802	60.6885	59.6502	96.6963	95.8102
19.2	15.3574	14.9102	14.5957	13.9402	18.377	17.6802	37.1973	36.5802	60.6777	59.6502	96.6855	95.8102
19.3	15.3545	14.9102	14.585	13.9402	18.374	17.6802	37.1943	36.5802	60.667	59.6502	96.6826	95.8102
19.4	15.3506	14.9102	14.5811	13.9402	18.3701	17.6802	37.1904	36.5802	60.6631	59.6502	96.6709	95.8102
19.5	15.3457	14.9102	14.5762	13.9402	18.3652	17.6802	37.1855	36.5802	60.6465	59.6502	96.666	95.8102
19.6	15.3379	14.9102	14.5566	13.9402	18.3496	17.6802	37.1777	36.5802	60.6387	59.6502	96.6582	95.8102
19.7	15.335	14.9102	14.5537	13.9402	18.3467	17.6802	37.1748	36.5802	60.6279	59.6502	96.6553	95.8102
19.8	15.3311	14.9102	14.5498	13.9402	18.3311	17.6802	37.1709	36.5802	60.624	59.6502	96.6514	95.8102
19.9	15.3262	14.9102	14.5449	13.9402	18.3262	17.6802	37.1582	36.5802	60.6074	59.6502	96.6465	95.8102
20	15.3174	14.9102	14.5283	13.9402	18.3174	17.6802	37.1494	36.5802	60.5986	59.6502	96.6377	95.8102
20.1	15.3125	14.9102	14.5234	13.9402	18.3008	17.6802	37.1445	36.5802	60.5938	59.6502	96.6328	95.8102
20.2	15.3066	14.9102	14.5059	13.9402	18.2949	17.6802	37.1387	36.5802	60.5879	59.6502	96.627	95.8102
20.3	15.2998	14.9102	14.499	13.9402	18.2881	17.6802	37.1318	36.5802	60.5811	59.6502	96.6084	95.8102
20.4	15.2959	14.9102	14.4951	13.9402	18.2764	17.6802	37.1279	36.5802	60.5654	59.6502	96.6045	95.8102
20.5	15.29	14.9102	14.4893	13.9402	18.2705	17.6802	37.1221	36.5802	60.5518	59.6502	96.5986	95.8102
20.6	15.2871	14.9102	14.4863	13.9402	18.2676	17.6802	37.1074	36.5802	60.5488	59.6502	96.5957	95.8102
20.7	15.2832	14.9102	14.4824	13.9402	18.2637	17.6802	37.1035	36.5802	60.5332	59.6502	96.5918	95.8102
20.8	15.2783	14.9102	14.4658	13.9402	18.2471	17.6802	37.0986	36.5802	60.5283	59.6502	96.5986	95.8102
20.9	15.2813	14.9102	14.457	13.9402	18.25	17.6802	37.0898	36.5802	60.5117	59.6502	96.5898	95.8102
21	15.2793	14.9102	14.4551	13.9402	18.248	17.6802	37.0879	36.5802	60.5098	59.6502	96.5879	95.8102
21.1	15.2744	14.9102	14.4502	13.9402	18.2314	17.6802	37.083	36.5802	60.5049	59.6502	96.583	95.8102
21.2	15.2695	14.9102	14.4453	13.9402	18.2266	17.6802	37.0781	36.5802	60.4883	59.6502	96.5781	95.8102
21.3	15.2695	14.9102	14.4375	13.9402	18.2266	17.6802	37.0781	36.5802	60.4883	59.6502	96.5781	95.8102
21.4	15.2646	14.9102	14.4326	13.9402	18.2139	17.6802	37.0732	36.5802	60.4834	59.6502	96.5811	95.8102
21.5	15.2607	14.9102	14.4287	13.9402	18.21	17.6802	37.0811	36.5802	60.4717	59.6502	96.5771	95.8102
21.6	15.249	14.9102	14.417	13.9402	18.1982	17.6802	37.0693	36.5802	60.46	59.6502	96.5771	95.8102
21.7	15.2441	14.9102	14.4004	13.9402	18.1816	17.6802	37.0645	36.5802	60.4434	59.6502	96.5605	95.8102
21.8	15.2363	14.9102	14.3848	13.9402	18.1738	17.6802	37.0449	36.5802	60.4355	59.6502	96.5645	95.8102
21.9	15.2402	14.9102	14.3809	13.9402	18.1699	17.6802	37.0527	36.5802	60.4238	59.6502	96.5605	95.8102
22	15.2256	14.9102	14.374	13.9402	18.1631	17.6802	37.0342	36.5802	60.4053	59.6502	96.5537	95.8102
22.1	15.2197	14.9102	14.3682	13.9402	18.1572	17.6802	37.0283	36.5802	60.3994	59.6502	96.5479	95.8102
22.2	15.2178	14.9102	14.3662	13.9402	18.1553	17.6802	37.0264	36.5802	60.3857	59.6502	96.5459	95.8102
22.3	15.2129	14.9102	14.3496	13.9402	18.1426	17.6802	37.0215	36.5802	60.3809	59.6502	96.5527	95.8102
22.4	15.2012	14.9102	14.3379	13.9402	18.1309	17.6802	37.0098	36.5802	60.3691	59.6502	96.541	95.8102
22.5	15.2012	14.9102	14.3379	13.9402	18.1309	17.6802	37.0098	36.5802	60.3613	59.6502	96.541	95.8102
22.6	15.2051	14.9102	14.334	13.9402	18.127	17.6802	37.0059	36.5802	60.3574	59.6502	96.5371	95.8102
22.7	15.2002	14.9102	14.3291	13.9402	18.1104	17.6802	37.001	36.5802	60.3525	59.6502	96.5322	95.8102
22.8	15.1943	14.9102	14.3232	13.9402	18.1045	17.6802	36.9873	36.5802	60.335	59.6502	96.5264	95.8102
22.9	15.1895	14.9102	14.3105	13.9402	18.0996	17.6802	36.9824	36.5802	60.3301	59.6502	96.5215	95.8102
23	15.1836	14.9102	14.3047	13.9402	18.0938	17.6802	36.9766	36.5802	60.3164	59.6502	96.5156	95.8102
23.1	15.1787	14.9102	14.2998	13.9402	18.0889	17.6802	36.96	36.5802	60.3115	59.6502	96.5107	95.8102
23.2	15.1865	14.9102	14.2842	13.9402	18.085	17.6802	36.9561	36.5802	60.3076	59.6502	96.4951	95.8102
23.3	15.1807	14.9102	14.2783	13.9402	18.0791	17.6802	36.9502	36.5802	60.29	59.6502	96.501	95.8102
23.4	15.1777	14.9102	14.2754	13.9402	18.0762	17.6802	36.9473	36.5802	60.2871	59.6502	96.498	95.8102
23.5	15.1602	14.9102	14.2617	13.9402	18.0625	17.6802	36.9414	36.5802	60.2813	59.6502	96.5	95.8102
23.6	15.1553	14.9102	14.2568	13.9402	18.0576	17.6802	36.9365	36.5802	60.2764	59.6502	96.4873	95.8102
23.7	15.1494	14.9102	14.2393	13.9402	18.0518	17.6802	36.9307	36.5802	60.2705	59.6502	96.4814	95.8102
23.8	15.1494	14.9102	14.2393	13.9402	18.0518	17.6802	36.9189	36.5802	60.2705	59.6502	96.4814	95.8102
23.9	15.1455	14.9102	14.2354	13.9402	18.0479	17.6802	36.915	36.5802	60.2666	59.6502	96.4854	95.8102
24	15.1406	14.9102	14.2305	13.9402	18.0313	17.6802	36.9023	36.5802	60.2617	59.6502	96.4805	95.8102
24.1	15.1348	14.9102	14.2129	13.9402	18.0254	17.6802	36.8965	36.5802	60.248	59.6502	96.4746	95.8102
24.2	15.1328	14.9102	14.2109	13.9402	18.0234	17.6802	36.8945	36.5802	60.2461	59.6502	96.4727	95.8102
24.3	15.124	14.9102	14.2021	13.9402	18.0146	17.6802	36.8857	36.5802	60.2256	59.6502	96.4639	95.8102
24.4	15.1191	14.9102	14.1895	13.9402	18.0098	17.6802	36.8809	36.5802	60.2207	59.6502	96.459	95.8102
24.5	15.1045	14.9102	14.1826	13.9402	18.0029	17.6802	36.874	36.5802	60.2139	59.6502	96.4639	95.8102
24.6	15.1016	14.9102	14.1797	13.9402	18	17.6802	36.8594	36.5802	60.1992	59.6502	96.4609	95.8102
24.7	15.0967	14.9102	14.1631	13.9402	17.9951	17.6802	36.8545	36.5802	60.1943	59.6502	96.4639	95.8102
24.8	15.0938	14.9102	14.1602	13.9402	17.9922	17.6802	36.8516	36.5802	60.1914	59.6502	96.4609	95.8102
24.9	15.0879	14.9102	14.1543	13.9402	17.9746	17.6802	36.8457	36.5802	60.1855	59.6502	96.4551	95.8102
25	15.085	14.9102	14.1514	13.9402	17.9717	17.6802	36.835	36.5802	60.1748	59.6502	96.4521	95.8102
25.1	15.085	14.9102	14.1436	13.9402	17.9717	17.6802	36.8232	36.5802	60.1748	59.6502	96.4521	95.8102
25.2	15.0771	14.9102	14.1357	13.9402	17.9561	17.6802	36.8154	36.5802	60.1553	59.6502	96.4443	95.8102
25.3	15.0742	14.9102	14.1133	13.9402	17.9453	17.6802	36.8047	36.5802	60.1445	59.6502	96.4336	95.8102
25.4	15.0723	14.9102	14.1113	13.9402	17.9434	17.6802	36.7949	36.5802	60.1348	59.6502	96.4316	95.8102
25.5	15.0645	14.9102	14.1035	13.9402	17.9355	17.6802	36.7871	36.5802	60.127	59.6502	96.4238	95.8102
25.6	15.0615	14.9102	14.0928	13.9402	17.9326	17.6802	36.7725	36.5802	60.124	59.6502	96.4209	95.8102
25.7	15.0664	14.9102	14.0859	13.9402	17.9258	17.6802	36.7656	36.5802	60.1055	59.6502	96.4141	95.8102
25.8	15.0459	14.9102	14.0654	13.9402	17.917	17.6802	36.7568	36.5802	60.0967	59.6502	96.4053	95.8102
25.9	15.0576	14.9102	14.0654	13.9402	17.917	17.6802	36.7451	36.5802	60.0889	59.6502	96.417	95.8102
26	15.0449	14.9102	14.0527	13.9402	17.9043	17.6802	36.7324	36.5802	60.0762	59.6502	96.4043	95.8102
26.1	15.0391	14.9102	14.0352	13.9402	17.8984	17.6802	36.7188	36.5802	60.0586	59.6502	96.3984	95.8102
26.2	15.0342	14.9102	14.0225	13.9402	17.8936	17.6802	36.7217	36.5802	60.0537	59.6502	96.3936	95.8102
26.3	15.0264	14.9102	14.0146	13.9402	17.8857	17.6802	36.7139	36.5802	60.0459	59.6502	96.3857	95.8102
26.4	15.0146	14.9102	14.0146	13.9402	17.8857	17.6802	36.7139	36.5802	60.0381	59.6502	96.3857	95.8102
26.5	15.0068	14.9102	14.0068	13.9402	17.8779	17.6802	36.7061	36.5802	60.0303	59.6502	96.3779	95.8102
26.6	15.002	14.9102	13.9902	13.9402	17.873	17.6802	36.7012	36.5802	60.0137	59.6502	96.373	95.8102
26.7	15.002	14.9102	13.9902	13.9402	17.873	17.6802	36.7012	36.5802	60.0137	59.6502	96.373	95.8102
26.8	14.9951	14.9102	13.9834	13.9402	17.8662	17.6802	36.6943	36.5802	60.0068	59.6502	96.3662	95.8102
26.9	14.9971	14.9102	13.9658	13.9402	17.8564	17.6802	36.6768	36.5802	59.9854	59.6502	96.3643	95.8102
27	14.9834	14.9102	13.9639	13.9402	17.8428	17.6802	36.6748	36.5802	59.9834	59.6502	96.3623	95.8102
27.1	14.9746	14.9102	13.9434	13.9402	17.834	17.6802	36.666	36.5802	59.9668	59.6502	96.3535	95.8102
27.2	14.9795	14.9102	13.9365	13.9402	17.8271	17.6802	36.6592	36.5802	59.96	59.6502	96.3467	95.8102
27.3	14.9648	14.9102	13.9258	13.9402	17.8242	17.6802	36.6563	36.5802	59.957	59.6502	96.3438	95.8102
27.4	14.9668	14.9102	13.916	13.9402	17.8145	17.6802	36.6348	36.5802	59.9355	59.6502	96.334	95.8102
27.5	14.959	14.9102	13.9082	13.9402	17.7988	17.6802	36.627	36.5802	59.9277	59.6502	96.3184	95.8102
27.6	14.9531	14.9102	13.8906	13.9402	17.793	17.6802	36.6211	36.5802	59.9219	59.6502	96.3203	95.8102
27.7	14.9512	14.9102	13.8887	13.9402	17.791	17.6802	36.6191	36.5802	59.9199	59.6502	96.3184	95.8102
27.8	14.9414	14.9102	13.8789	13.9402	17.7813	17.6802	36.6094	36.5802	59.9102	59.6502	96.3086	95.8102
27.9	14.9365	14.9102	13.874	13.9402	17.7764	17.6802	36.6045	36.5802	59.9053	59.6502	96.3154	95.8102
28	14.9287	14.9102	13.8584	13.9402	17.7568	17.6802	36.5967	36.5802	59.8896	59.6502	96.2959	95.8102
28.1	14.9404	14.9102	13.8584	13.9402	17.7568	17.6802	36.5967	36.5802	59.8896	59.6502	96.2959	95.8102
28.2	14.9336	14.9102	13.8516	13.9402	17.75	17.6802	36.582	36.5802	59.8711	59.6502	96.2891	95.8102
28.3	14.9365	14.9102	13.8467	13.9402	17.7451	17.6802	36.585	36.5802	59.8662	59.6502	96.2842	95.8102
28.4	14.9307	14.9102	13.8291	13.9402	17.7393	17.6802	36.5908	36.5802	59.8604	59.6502	96.2705	95.8102
28.5	14.9287	14.9102	13.8271	13.9402	17.7373	17.6802	36.5889	36.5802	59.8506	59.6502	96.2764	95.8102
28.6	14.9209	14.9102	13.8193	13.9402	17.7217	17.6802	36.5693	36.5802	59.8311	59.6502	96.2686	95.8102
28.7	14.9131	14.9102	13.8115	13.9402	17.7021	17.6802	36.5615	36.5802	59.8232	59.6502	96.2607	95.8102
28.8	14.9063	14.9102	13.8047	13.9402	17.6953	17.6802	36.5547	36.5802	59.8086	59.6502	96.2461	95.8102
28.9	14.8984	14.9102	13.7852	13.9402	17.6875	17.6802	36.5469	36.5802	59.8008	59.6502	96.2383	95.8102
29	14.8877	14.9102	13.7822	13.9402	17.6846	17.6802	36.5439	36.5802	59.7861	59.6502	96.2354	95.8102
29.1	14.8887	14.9102	13.7754	13.9402	17.6777	17.6802	36.5371	36.5802	59.7676	59.6502	96.2285	95.8102
29.2	14.8838	14.9102	13.7627	13.9402	17.6611	17.6802	36.5439	36.5802	59.7627	59.6502	96.2236	95.8102
29.3	14.8682	14.9102	13.7549	13.9402	17.665	17.6802	36.5361	36.5802	59.7471	59.6502	96.2158	95.8102
29.4	14.8662	14.9102	13.7529	13.9402	17.6514	17.6802	36.5225	36.5802	59.7451	59.6502	96.2139	95.8102
29.5	14.8633	14.9102	13.75	13.9402	17.6484	17.6802	36.5117	36.5802	59.7422	59.6502	96.2109	95.8102
29.6	14.8584	14.9102	13.7451	13.9402	17.6357	17.6802	36.5146	36.5802	59.7256	59.6502	96.2061	95.8102
29.7	14.8535	14.9102	13.7285	13.9402	17.6309	17.6802	36.502	36.5802	59.7207	59.6502	96.2012	95.8102
29.8	14.8555	14.9102	13.7227	13.9402	17.625	17.6802	36.4961	36.5802	59.707	59.6502	96.1953	95.8102
29.9	14.8516	14.9102	13.7188	13.9402	17.6094	17.6802	36.4922	36.5802	59.7031	59.6502	96.1797	95.8102
30	14.8486	14.9102	13.7158	13.9402	17.6064	17.6802	36.4893	36.5802	59.6885	59.6502	96.1768	95.8102
30.1	14.835	14.9102	13.7021	13.9402	17.6006	17.6802	36.4912	36.5802	59.6826	59.6502	96.1709	95.8102
30.2	14.833	14.9102	13.7002	13.9402	17.5908	17.6802	36.4893	36.5802	59.6729	59.6502	96.1689	95.8102
30.3	14.8262	14.9102	13.6934	13.9402	17.584	17.6802	36.4824	36.5802	59.6543	59.6502	96.1621	95.8102
30.4	14.834	14.9102	13.6934	13.9402	17.584	17.6802	36.4746	36.5802	59.6543	59.6502	96.1543	95.8102
30.5	14.8311	14.9102	13.6904	13.9402	17.5811	17.6802	36.4795	36.5802	59.6396	59.6502	96.1514	95.8102
30.6	14.8174	14.9102	13.6846	13.9402	17.5635	17.6802	36.4736	36.5802	59.6338	59.6502	96.1338	95.8102
30.7	14.8174	14.9102	13.6846	13.9402	17.5635	17.6802	36.4736	36.5802	59.626	59.6502	96.1338	95.8102
30.8	14.8154	14.9102	13.6709	13.9402	17.5615	17.6802	36.4717	36.5802	59.624	59.6502	96.1318	95.8102
30.9	14.8125	14.9102	13.668	13.9402	17.5586	17.6802	36.4688	36.5802	59.6094	59.6502	96.1289	95.8102
31	14.8086	14.9102	13.6641	13.9402	17.5547	17.6802	36.4648	36.5802	59.5977	59.6502	96.125	95.8102
31.1	14.8066	14.9102	13.6621	13.9402	17.5449	17.6802	36.4629	36.5802	59.584	59.6502	96.123	95.8102
31.2	14.7979	14.9102	13.6533	13.9402	17.5361	17.6802	36.4541	36.5802	59.5752	59.6502	96.1143	95.8102
31.3	14.7959	14.9102	13.6514	13.9402	17.5342	17.6802	36.4639	36.5802	59.5654	59.6502	96.1123	95.8102
31.4	14.791	14.9102	13.6465	13.9402	17.5176	17.6802	36.459	36.5802	59.5605	59.6502	96.1074	95.8102
31.5	14.7871	14.9102	13.6426	13.9402	17.5137	17.6802	36.4551	36.5802	59.5449	59.6502	96.0957	95.8102
31.6	14.7813	14.9102	13.6367	13.9402	17.5078	17.6802	36.457	36.5802	59.5391	59.6502	96.0898	95.8102
31.7	14.7793	14.9102	13.6348	13.9402	17.5059	17.6802	36.4551	36.5802	59.5293	59.6502	96.0879	95.8102
31.8	14.7705	14.9102	13.626	13.9402	17.4893	17.6802	36.4385	36.5802	59.5088	59.6502	96.0674	95.8102
31.9	14.7559	14.9102	13.6152	13.9402	17.4863	17.6802	36.4355	36.5802	59.5059	59.6502	96.0762	95.8102
32	14.7656	14.9102	13.6133	13.9402	17.4844	17.6802	36.4336	36.5802	59.4922	59.6502	96.0625	95.8102
32.1	14.749	14.9102	13.5967	13.9402	17.4678	17.6802	36.4287	36.5802	59.4795	59.6502	96.0576	95.8102
32.2	14.7461	14.9102	13.5938	13.9402	17.4648	17.6802	36.4141	36.5802	59.4648	59.6502	96.0547	95.8102
32.3	14.7383	14.9102	13.5859	13.9402	17.4453	17.6802	36.3984	36.5802	59.457	59.6502	96.0469	95.8102
32.4	14.7383	14.9102	13.5859	13.9402	17.4375	17.6802	36.3984	36.5802	59.4492	59.6502	96.0469	95.8102
32.5	14.7383	14.9102	13.5859	13.9402	17.4375	17.6802	36.3984	36.5802	59.4375	59.6502	96.0469	95.8102
32.6	14.7344	14.9102	13.582	13.9402	17.4336	17.6802	36.3945	36.5802	59.4336	59.6502	96.0313	95.8102
32.7	14.7295	14.9102	13.5771	13.9402	17.4287	17.6802	36.3779	36.5802	59.4209	59.6502	96.0264	95.8102
32.8	14.7266	14.9102	13.5742	13.9402	17.4141	17.6802	36.375	36.5802	59.4063	59.6502	96.0234	95.8102
32.9	14.7236	14.9102	13.5713	13.9402	17.4111	17.6802	36.3838	36.5802	59.3955	59.6502	96.0127	95.8102
33	14.7188	14.9102	13.5664	13.9402	17.4063	17.6802	36.3789	36.5802	59.3789	59.6502	96.0078	95.8102
33.1	14.7188	14.9102	13.5664	13.9402	17.3984	17.6802	36.3672	36.5802	59.3672	59.6502	95.9961	95.8102
33.2	14.7217	14.9102	13.5615	13.9402	17.4014	17.6802	36.3701	36.5802	59.3623	59.6502	95.999	95.8102
33.3	14.7168	14.9102	13.5566	13.9402	17.3965	17.6802	36.3652	36.5802	59.3574	59.6502	95.9941	95.8102
33.4	14.7119	14.9102	13.5518	13.9402	17.3799	17.6802	36.3604	36.5802	59.3408	59.6502	95.9893	95.8102
33.5	14.6914	14.9102	13.543	13.9402	17.3711	17.6802	36.3633	36.5802	59.332	59.6502	95.9805	95.8102
33.6	14.6914	14.9102	13.543	13.9402	17.3711	17.6802	36.3633	36.5802	59.3242	59.6502	95.9727	95.8102
33.7	14.6729	14.9102	13.5322	13.9402	17.3525	17.6802	36.3525	36.5802	59.3135	59.6502	95.9619	95.8102
33.8	14.665	14.9102	13.5244	13.9402	17.3447	17.6802	36.333	36.5802	59.2939	59.6502	95.9541	95.8102
33.9	14.6602	14.9102	13.5078	13.9402	17.3398	17.6802	36.3281	36.5802	59.2891	59.6502	95.9375	95.8102
34	14.6543	14.9102	13.502	13.9402	17.334	17.6802	36.3223	36.5802	59.2832	59.6502	95.9316	95.8102
34.1	14.6475	14.9102	13.4951	13.9402	17.3154	17.6802	36.3271	36.5802	59.2686	59.6502	95.9248	95.8102
34.2	14.6465	14.9102	13.4941	13.9402	17.3145	17.6802	36.3262	36.5802	59.2559	59.6502	95.9238	95.8102
34.3	14.6387	14.9102	13.4746	13.9402	17.3066	17.6802	36.3184	36.5802	59.248	59.6502	95.916	95.8102
34.4	14.6318	14.9102	13.4678	13.9402	17.2998	17.6802	36.3115	36.5802	59.2412	59.6502	95.9092	95.8102
34.5	14.6299	14.9102	13.4658	13.9402	17.2979	17.6802	36.3096	36.5802	59.2275	59.6502	95.9072	95.8102
34.6	14.6133	14.9102	13.4531	13.9402	17.293	17.6802	36.293	36.5802	59.2227	59.6502	95.9023	95.8102
34.7	14.6152	14.9102	13.4551	13.9402	17.2949	17.6802	36.2949	36.5802	59.2168	59.6502	95.8965	95.8102
34.8	14.6104	14.9102	13.4502	13.9402	17.29	17.6802	36.29	36.5802	59.2119	59.6502	95.8916	95.8102
34.9	14.6006	14.9102	13.4404	13.9402	17.2803	17.6802	36.2803	36.5802	59.1904	59.6502	95.8818	95.8102
35	14.6006	14.9102	13.4404	13.9402	17.2803	17.6802	36.2803	36.5802	59.1904	59.6502	95.8818	95.8102
35.1	14.5977	14.9102	13.4375	13.9402	17.2773	17.6802	36.2773	36.5802	59.1797	59.6502	95.8672	95.8102
35.2	14.5928	14.9102	13.4326	13.9402	17.2725	17.6802	36.2725	36.5802	59.1748	59.6502	95.8623	95.8102
35.3	14.5957	14.9102	13.4355	13.9402	17.2754	17.6802	36.2676	36.5802	59.166	59.6502	95.8652	95.8102
35.4	14.5879	14.9102	13.4277	13.9402	17.2676	17.6802	36.2598	36.5802	59.1582	59.6502	95.8691	95.8102
35.5	14.5898	14.9102	13.4297	13.9402	17.2695	17.6802	36.2695	36.5802	59.1602	59.6502	95.8711	95.8102
35.6	14.5859	14.9102	13.4141	13.9402	17.2578	17.6802	36.2656	36.5802	59.1484	59.6502	95.8672	95.8102
35.7	14.5771	14.9102	13.4053	13.9402	17.249	17.6802	36.249	36.5802	59.1396	59.6502	95.8584	95.8102
35.8	14.5742	14.9102	13.4023	13.9402	17.2461	17.6802	36.2344	36.5802	59.125	59.6502	95.8555	95.8102
35.9	14.5723	14.9102	13.4004	13.9402	17.2441	17.6802	36.2324	36.5802	59.123	59.6502	95.8535	95.8102
36	14.5723	14.9102	13.4004	13.9402	17.2441	17.6802	36.2324	36.5802	59.1152	59.6502	95.8418	95.8102
36.1	14.5703	14.9102	13.3984	13.9402	17.2305	17.6802	36.2422	36.5802	59.1133	59.6502	95.8398	95.8102
36.2	14.5605	14.9102	13.3887	13.9402	17.2207	17.6802	36.2402	36.5802	59.0918	59.6502	95.8301	95.8102
36.3	14.5498	14.9102	13.3779	13.9402	17.21	17.6802	36.2217	36.5802	59.0811	59.6502	95.8193	95.8102
36.4	14.5479	14.9102	13.376	13.9402	17.208	17.6802	36.2197	36.5802	59.0791	59.6502	95.8174	95.8102
36.5	14.5371	14.9102	13.3652	13.9402	17.1973	17.6802	36.209	36.5802	59.0566	59.6502	95.8066	95.8102
36.6	14.5322	14.9102	13.3604	13.9402	17.1807	17.6802	36.2041	36.5802	59.0518	59.6502	95.8135	95.8102
36.7	14.5225	14.9102	13.3506	13.9402	17.1709	17.6802	36.1943	36.5802	59.042	59.6502	95.792	95.8102
36.8	14.5371	14.9102	13.3535	13.9402	17.166	17.6802	36.1973	36.5802	59.0371	59.6502	95.7949	95.8102
36.9	14.5176	14.9102	13.3457	13.9402	17.1582	17.6802	36.1973	36.5802	59.0293	59.6502	95.7871	95.8102
37	14.5176	14.9102	13.3379	13.9402	17.1582	17.6802	36.1895	36.5802	59.0176	59.6502	95.7871	95.8102
37.1	14.5098	14.9102	13.3301	13.9402	17.1387	17.6802	36.1699	36.5802	59.0098	59.6502	95.7793	95.8102
37.2	14.5049	14.9102	13.3135	13.9402	17.1338	17.6802	36.1572	36.5802	59.0049	59.6502	95.7744	95.8102
37.3	14.5029	14.9102	13.3115	13.9402	17.1318	17.6802	36.1553	36.5802	58.9951	59.6502	95.7725	95.8102
37.4	14.498	14.9102	13.3066	13.9402	17.1191	17.6802	36.1504	36.5802	58.9902	59.6502	95.7676	95.8102
37.5	14.4951	14.9102	13.3037	13.9402	17.1162	17.6802	36.1475	36.5802	58.9873	59.6502	95.7646	95.8102
37.6	14.4971	14.9102	13.3057	13.9402	17.1064	17.6802	36.1572	36.5802	58.9893	59.6502	95.7666	95.8102
37.7	14.4912	14.9102	13.292	13.9402	17.1006	17.6802	36.1514	36.5802	58.9717	59.6502	95.7607	95.8102
37.8	14.4854	14.9102	13.2861	13.9402	17.0947	17.6802	36.1455	36.5802	58.9658	59.6502	95.7549	95.8102
37.9	14.4805	14.9102	13.2891	13.9402	17.0898	17.6802	36.1406	36.5802	58.9609	59.6502	95.75	95.8102
38	14.4805	14.9102	13.2813	13.9402	17.0898	17.6802	36.1406	36.5802	58.9609	59.6502	95.75	95.8102
38.1	14.4775	14.9102	13.2666	13.9402	17.0869	17.6802	36.1377	36.5802	58.958	59.6502	95.7471	95.8102
38.2	14.4727	14.9102	13.2617	13.9402	17.082	17.6802	36.1328	36.5802	58.9453	59.6502	95.7344	95.8102
38.3	14.4678	14.9102	13.2451	13.9402	17.0771	17.6802	36.1279	36.5802	58.9404	59.6502	95.7295	95.8102
38.4	14.457	14.9102	13.2344	13.9402	17.0742	17.6802	36.125	36.5802	58.9258	59.6502	95.7266	95.8102
38.5	14.4473	14.9102	13.2246	13.9402	17.0645	17.6802	36.1152	36.5802	58.916	59.6502	95.7168	95.8102
38.6	14.4453	14.9102	13.2227	13.9402	17.0547	17.6802	36.125	36.5802	58.9141	59.6502	95.7148	95.8102
38.7	14.4395	14.9102	13.2051	13.9402	17.0488	17.6802	36.1191	36.5802	58.9082	59.6502	95.709	95.8102
38.8	14.4395	14.9102	13.2051	13.9402	17.0488	17.6802	36.1191	36.5802	58.9004	59.6502	95.6973	95.8102
38.9	14.4238	14.9102	13.1934	13.9402	17.0449	17.6802	36.1152	36.5802	58.8965	59.6502	95.7051	95.8102
39	14.4238	14.9102	13.1934	13.9402	17.0332	17.6802	36.1152	36.5802	58.8848	59.6502	95.7051	95.8102
39.1	14.4189	14.9102	13.1768	13.9402	17.04	17.6802	36.1104	36.5802	58.8799	59.6502	95.7002	95.8102
39.2	14.416	14.9102	13.1738	13.9402	17.0371	17.6802	36.1074	36.5802	58.8652	59.6502	95.6973	95.8102
39.3	14.415	14.9102	13.1729	13.9402	17.0361	17.6802	36.1064	36.5802	58.8564	59.6502	95.6963	95.8102
39.4	14.4111	14.9102	13.1611	13.9402	17.0322	17.6802	36.0908	36.5802	58.8525	59.6502	95.6924	95.8102
39.5	14.4082	14.9102	13.1582	13.9402	17.0176	17.6802	36.0879	36.5802	58.8496	59.6502	95.6895	95.8102
39.6	14.4033	14.9102	13.1533	13.9402	17.0127	17.6802	36.083	36.5802	58.833	59.6502	95.6924	95.8102
39.7	14.4004	14.9102	13.1387	13.9402	17.0098	17.6802	36.0801	36.5802	58.8301	59.6502	95.6895	95.8102
39.8	14.3984	14.9102	13.1367	13.9402	17.0078	17.6802	36.0781	36.5802	58.8281	59.6502	95.6875	95.8102
39.9	14.3955	14.9102	13.1338	13.9402	17.0049	17.6802	36.0752	36.5802	58.8174	59.6502	95.6846	95.8102
40	14.3877	14.9102	13.126	13.9402	16.9932	17.6802	36.0752	36.5802	58.8174	59.6502	95.6846	95.8102
40.1	14.3779	14.9102	13.1162	13.9402	16.9834	17.6802	36.0654	36.5802	58.7959	59.6502	95.6748	95.8102
40.2	14.3848	14.9102	13.1113	13.9402	16.9824	17.6802	36.0723	36.5802	58.8027	59.6502	95.6738	95.8102
40.3	14.3809	14.9102	13.1074	13.9402	16.9785	17.6802	36.0684	36.5802	58.791	59.6502	95.6699	95.8102
40.4	14.3809	14.9102	13.0957	13.9402	16.9785	17.6802	36.0684	36.5802	58.791	59.6502	95.6582	95.8102
40.5	14.3779	14.9102	13.0928	13.9402	16.9756	17.6802	36.0654	36.5802	58.7764	59.6502	95.6553	95.8102
40.6	14.375	14.9102	13.0898	13.9402	16.9727	17.6802	36.0742	36.5802	58.7734	59.6502	95.6523	95.8102
40.7	14.373	14.9102	13.0879	13.9402	16.9707	17.6802	36.0723	36.5802	58.7598	59.6502	95.6504	95.8102
40.8	14.373	14.9102	13.0801	13.9402	16.959	17.6802	36.0801	36.5802	58.7598	59.6502	95.6504	95.8102
40.9	14.3662	14.9102	13.0732	13.9402	16.9521	17.6802	36.0732	36.5802	58.7451	59.6502	95.6436	95.8102
41	14.3633	14.9102	13.0703	13.9402	16.9414	17.6802	36.0703	36.5802	58.7422	59.6502	95.6406	95.8102
41.1	14.3633	14.9102	13.0703	13.9402	16.9414	17.6802	36.0703	36.5802	58.7305	59.6502	95.6406	95.8102
41.2	14.3584	14.9102	13.0654	13.9402	16.9365	17.6802	36.0654	36.5802	58.7178	59.6502	95.6357	95.8102
41.3	14.3555	14.9102	13.0508	13.9402	16.9219	17.6802	36.0625	36.5802	58.7148	59.6502	95.6211	95.8102
41.4	14.3506	14.9102	13.0459	13.9402	16.917	17.6802	36.0576	36.5802	58.71	59.6502	95.6162	95.8102
41.5	14.3447	14.9102	13.0322	13.9402	16.9033	17.6802	36.0518	36.5802	58.7041	59.6502	95.6104	95.8102
41.6	14.3525	14.9102	13.0322	13.9402	16.9033	17.6802	36.0518	36.5802	58.7041	59.6502	95.6104	95.8102
41.7	14.3447	14.9102	13.0322	13.9402	16.9033	17.6802	36.0439	36.5802	58.6924	59.6502	95.6104	95.8102
41.8	14.3418	14.9102	13.0293	13.9402	16.8887	17.6802	36.0488	36.5802	58.6895	59.6502	95.5996	95.8102
41.9	14.3379	14.9102	13.0137	13.9402	16.8848	17.6802	36.0449	36.5802	58.6855	59.6502	95.5957	95.8102
42	14.3379	14.9102	13.0137	13.9402	16.8848	17.6802	36.0449	36.5802	58.6777	59.6502	95.5957	95.8102
42.1	14.335	14.9102	13.0029	13.9402	16.8818	17.6802	36.042	36.5802	58.6748	59.6502	95.5928	95.8102
42.2	14.3164	14.9102	12.9961	13.9402	16.875	17.6802	36.0352	36.5802	58.6563	59.6502	95.5742	95.8102
42.3	14.3252	14.9102	12.9932	13.9402	16.8721	17.6802	36.0439	36.5802	58.6533	59.6502	95.5635	95.8102
42.4	14.3232	14.9102	12.9795	13.9402	16.8623	17.6802	36.0303	36.5802	58.6514	59.6502	95.5615	95.8102
42.5	14.3232	14.9102	12.9795	13.9402	16.8701	17.6802	36.042	36.5802	58.6514	59.6502	95.5615	95.8102
42.6	14.3232	14.9102	12.9795	13.9402	16.8701	17.6802	36.042	36.5802	58.6436	59.6502	95.5615	95.8102
42.7	14.3115	14.9102	12.9795	13.9402	16.8623	17.6802	36.042	36.5802	58.6436	59.6502	95.5615	95.8102
42.8	14.3115	14.9102	12.9795	13.9402	16.8701	17.6802	36.042	36.5802	58.6318	59.6502	95.5615	95.8102
42.9	14.3096	14.9102	12.9697	13.9402	16.8604	17.6802	36.04	36.5802	58.6299	59.6502	95.5596	95.8102
43	14.2988	14.9102	12.959	13.9402	16.8496	17.6802	36.0293	36.5802	58.6074	59.6502	95.5488	95.8102
43.1	14.2969	14.9102	12.957	13.9402	16.8477	17.6802	36.0273	36.5802	58.6055	59.6502	95.5469	95.8102
43.2	14.2939	14.9102	12.9541	13.9402	16.8447	17.6802	36.0244	36.5802	58.5947	59.6502	95.5439	95.8102
43.3	14.291	14.9102	12.9512	13.9402	16.8418	17.6802	36.0293	36.5802	58.5918	59.6502	95.541	95.8102
43.4	14.291	14.9102	12.9512	13.9402	16.8496	17.6802	36.0293	36.5802	58.5918	59.6502	95.541	95.8102
43.5	14.291	14.9102	12.9512	13.9402	16.8496	17.6802	36.0293	36.5802	58.5801	59.6502	95.541	95.8102
43.6	14.2764	14.9102	12.9561	13.9402	16.8389	17.6802	36.0264	36.5802	58.5693	59.6502	95.5264	95.8102
43.7	14.2842	14.9102	12.9521	13.9402	16.835	17.6802	36.0225	36.5802	58.5654	59.6502	95.5342	95.8102
43.8	14.2842	14.9102	12.9521	13.9402	16.835	17.6802	36.0225	36.5802	58.5654	59.6502	95.5342	95.8102
43.9	14.2813	14.9102	12.9492	13.9402	16.832	17.6802	36.0117	36.5802	58.5508	59.6502	95.5313	95.8102
44	14.2734	14.9102	12.9414	13.9402	16.8125	17.6802	36.0039	36.5802	58.543	59.6502	95.5234	95.8102
44.1	14.2734	14.9102	12.9414	13.9402	16.8125	17.6802	36.0117	36.5802	58.543	59.6502	95.5234	95.8102
44.2	14.2705	14.9102	12.9385	13.9402	16.8096	17.6802	36.0088	36.5802	58.5322	59.6502	95.5205	95.8102
44.3	14.2695	14.9102	12.9375	13.9402	16.8086	17.6802	36.0078	36.5802	58.5313	59.6502	95.5195	95.8102
44.4	14.2686	14.9102	12.9365	13.9402	16.8076	17.6802	36.0068	36.5802	58.5186	59.6502	95.5186	95.8102
44.5	14.2617	14.9102	12.9297	13.9402	16.8008	17.6802	36	36.5802	58.5117	59.6502	95.5117	95.8102
44.6	14.2539	14.9102	12.9219	13.9402	16.7813	17.6802	36.0039	36.5802	58.5039	59.6502	95.5039	95.8102
44.7	14.2637	14.9102	12.9199	13.9402	16.7793	17.6802	36.002	36.5802	58.4941	59.6502	95.502	95.8102
44.8	14.2588	14.9102	12.915	13.9402	16.7744	17.6802	35.9971	36.5802	58.4775	59.6502	95.4971	95.8102
44.9	14.2559	14.9102	12.9121	13.9402	16.7637	17.6802	35.9941	36.5802	58.4746	59.6502	95.4941	95.8102
45	14.249	14.9102	12.9053	13.9402	16.7568	17.6802	35.9756	36.5802	58.4561	59.6502	95.4873	95.8102
45.1	14.249	14.9102	12.9053	13.9402	16.7568	17.6802	35.9756	36.5802	58.4482	59.6502	95.4951	95.8102
45.2	14.2432	14.9102	12.8994	13.9402	16.751	17.6802	35.9697	36.5802	58.4424	59.6502	95.4814	95.8102
45.3	14.2432	14.9102	12.8994	13.9402	16.7393	17.6802	35.9697	36.5802	58.4424	59.6502	95.4814	95.8102
45.4	14.2383	14.9102	12.8945	13.9402	16.7461	17.6802	35.9648	36.5802	58.4258	59.6502	95.4766	95.8102
45.5	14.2432	14.9102	12.8916	13.9402	16.7432	17.6802	35.9736	36.5802	58.4229	59.6502	95.4619	95.8102
45.6	14.2354	14.9102	12.8955	13.9402	16.7236	17.6802	35.9541	36.5802	58.415	59.6502	95.4541	95.8102
45.7	14.2324	14.9102	12.8926	13.9402	16.7207	17.6802	35.9629	36.5802	58.4043	59.6502	95.4512	95.8102
45.8	14.2305	14.9102	12.8906	13.9402	16.7188	17.6802	35.9609	36.5802	58.3906	59.6502	95.4492	95.8102
45.9	14.2256	14.9102	12.8857	13.9402	16.7139	17.6802	35.9561	36.5802	58.3857	59.6502	95.4443	95.8102
46	14.2295	14.9102	12.8662	13.9402	16.6982	17.6802	35.9482	36.5802	58.3779	59.6502	95.4365	95.8102
46.1	14.2246	14.9102	12.8613	13.9402	16.6934	17.6802	35.9434	36.5802	58.373	59.6502	95.4316	95.8102
46.2	14.2178	14.9102	12.8545	13.9402	16.6865	17.6802	35.9248	36.5802	58.3662	59.6502	95.4365	95.8102
46.3	14.21	14.9102	12.8467	13.9402	16.6787	17.6802	35.9287	36.5802	58.3584	59.6502	95.4287	95.8102
46.4	14.1982	14.9102	12.8467	13.9402	16.667	17.6802	35.9287	36.5802	58.3584	59.6502	95.4287	95.8102
46.5	14.1875	14.9102	12.8359	13.9402	16.6563	17.6802	35.918	36.5802	58.3477	59.6502	95.418	95.8102
46.6	14.1826	14.9102	12.8311	13.9402	16.6514	17.6802	35.9131	36.5802	58.3428	59.6502	95.4131	95.8102
46.7	14.166	14.9102	12.8066	13.9402	16.6348	17.6802	35.8965	36.5802	58.3184	59.6502	95.3965	95.8102
46.8	14.1611	14.9102	12.8018	13.9402	16.6299	17.6802	35.8916	36.5802	58.3135	59.6502	95.3994	95.8102
46.9	14.166	14.9102	12.8066	13.9402	16.6348	17.6802	35.8848	36.5802	58.3066	59.6502	95.4043	95.8102
47	14.168	14.9102	12.8086	13.9402	16.6367	17.6802	35.8867	36.5802	58.3086	59.6502	95.4063	95.8102
47.1	14.1934	14.9102	12.834	13.9402	16.6738	17.6802	35.9121	36.5802	58.334	59.6502	95.4316	95.8102
47.2	14.1963	14.9102	12.8369	13.9402	16.6768	17.6802	35.915	36.5802	58.3369	59.6502	95.4346	95.8102
47.3	14.1982	14.9102	12.8389	13.9402	16.6787	17.6802	35.917	36.5802	58.3389	59.6502	95.4365	95.8102
47.4	14.2031	14.9102	12.8438	13.9402	16.6836	17.6802	35.9219	36.5802	58.332	59.6502	95.4414	95.8102
47.5	14.2334	14.9102	12.874	13.9402	16.7139	17.6802	35.9521	36.5802	58.3623	59.6502	95.4717	95.8102
47.6	14.2432	14.9102	12.8721	13.9402	16.7236	17.6802	35.9619	36.5802	58.3643	59.6502	95.4932	95.8102
47.7	14.2402	14.9102	12.8691	13.9402	16.7207	17.6802	35.9512	36.5802	58.3613	59.6502	95.4902	95.8102
47.8	14.2402	14.9102	12.877	13.9402	16.7285	17.6802	35.959	36.5802	58.3691	59.6502	95.498	95.8102
47.9	14.2227	14.9102	12.8594	13.9402	16.7109	17.6802	35.9414	36.5802	58.3516	59.6502	95.4805	95.8102
48	14.2275	14.9102	12.8643	13.9402	16.7158	17.6802	35.9463	36.5802	58.3447	59.6502	95.4854	95.8102
48.1	14.2148	14.9102	12.8516	13.9402	16.7031	17.6802	35.9336	36.5802	58.3438	59.6502	95.4727	95.8102
48.2	14.2129	14.9102	12.8496	13.9402	16.7012	17.6802	35.9316	36.5802	58.3301	59.6502	95.4707	95.8102
48.3	14.208	14.9102	12.8447	13.9402	16.6963	17.6802	35.915	36.5802	58.3252	59.6502	95.4541	95.8102
48.4	14.2051	14.9102	12.8418	13.9402	16.6816	17.6802	35.9121	36.5802	58.3223	59.6502	95.4434	95.8102
48.5	14.1934	14.9102	12.8418	13.9402	16.6816	17.6802	35.9121	36.5802	58.3145	59.6502	95.4434	95.8102
48.6	14.1885	14.9102	12.8252	13.9402	16.6768	17.6802	35.9072	36.5802	58.3096	59.6502	95.4385	95.8102
48.7	14.1885	14.9102	12.8252	13.9402	16.6768	17.6802	35.9072	36.5802	58.3096	59.6502	95.4385	95.8102
48.8	14.1846	14.9102	12.833	13.9402	16.6729	17.6802	35.9033	36.5802	58.3057	59.6502	95.4346	95.8102
48.9	14.1807	14.9102	12.8291	13.9402	16.6689	17.6802	35.8994	36.5802	58.3018	59.6502	95.4307	95.8102
49	14.1758	14.9102	12.8125	13.9402	16.6641	17.6802	35.8945	36.5802	58.2852	59.6502	95.4258	95.8102
49.1	14.1758	14.9102	12.8125	13.9402	16.6563	17.6802	35.8945	36.5802	58.2852	59.6502	95.4141	95.8102
49.2	14.1709	14.9102	12.8076	13.9402	16.6514	17.6802	35.8818	36.5802	58.2803	59.6502	95.4092	95.8102
49.3	14.166	14.9102	12.8027	13.9402	16.6465	17.6802	35.877	36.5802	58.2754	59.6502	95.4043	95.8102
49.4	14.1641	14.9102	12.793	13.9402	16.6445	17.6802	35.875	36.5802	58.2734	59.6502	95.4023	95.8102
49.5	14.1631	14.9102	12.792	13.9402	16.6436	17.6802	35.874	36.5802	58.2725	59.6502	95.3936	95.8102
49.6	14.1582	14.9102	12.7871	13.9402	16.627	17.6802	35.8574	36.5802	58.2676	59.6502	95.377	95.8102
49.7	14.1416	14.9102	12.7822	13.9402	16.6221	17.6802	35.8525	36.5802	58.2549	59.6502	95.3643	95.8102
49.8	14.1396	14.9102	12.7803	13.9402	16.6201	17.6802	35.8506	36.5802	58.2529	59.6502	95.3506	95.8102
49.9	14.1367	14.9102	12.7656	13.9402	16.6172	17.6802	35.8477	36.5802	58.25	59.6502	95.3359	95.8102
50	14.1348	14.9102	12.7637	13.9402	16.6152	17.6802	35.8457	36.5802	58.248	59.6502	95.3262	95.8102
50.1	14.1211	14.9102	12.7578	13.9402	16.6094	17.6802	35.8398	36.5802	58.2305	59.6502	95.3203	95.8102
50.2	14.1211	14.9102	12.7578	13.9402	16.6094	17.6802	35.8398	36.5802	58.2305	59.6502	95.3203	95.8102
50.3	14.1133	14.9102	12.75	13.9402	16.6016	17.6802	35.8242	36.5802	58.2227	59.6502	95.3008	95.8102
50.4	14.1104	14.9102	12.7471	13.9402	16.5986	17.6802	35.8213	36.5802	58.2197	59.6502	95.2979	95.8102
50.5	14.1133	14.9102	12.7422	13.9402	16.5938	17.6802	35.8242	36.5802	58.2227	59.6502	95.3008	95.8102
50.6	14.1104	14.9102	12.7471	13.9402	16.5986	17.6802	35.8096	36.5802	58.2197	59.6502	95.29	95.8102
50.7	14.1084	14.9102	12.7373	13.9402	16.5889	17.6802	35.8076	36.5802	58.2178	59.6502	95.2764	95.8102
50.8	14.1113	14.9102	12.7402	13.9402	16.5918	17.6802	35.8105	36.5802	58.2207	59.6502	95.2793	95.8102
50.9	14.1064	14.9102	12.7354	13.9402	16.5869	17.6802	35.8057	36.5802	58.208	59.6502	95.2666	95.8102
51	14.1064	14.9102	12.7354	13.9402	16.5869	17.6802	35.8057	36.5802	58.208	59.6502	95.2549	95.8102
51.1	14.0928	14.9102	12.7412	13.9402	16.585	17.6802	35.8037	36.5802	58.2061	59.6502	95.2412	95.8102
51.2	14.0918	14.9102	12.7402	13.9402	16.584	17.6802	35.8145	36.5802	58.2051	59.6502	95.2324	95.8102
51.3	14.0869	14.9102	12.7275	13.9402	16.5791	17.6802	35.8096	36.5802	58.1885	59.6502	95.2158	95.8102
51.4	14.0928	14.9102	12.7334	13.9402	16.5732	17.6802	35.8154	36.5802	58.1943	59.6502	95.2139	95.8102
51.5	14.082	14.9102	12.7305	13.9402	16.582	17.6802	35.8008	36.5802	58.1914	59.6502	95.2109	95.8102
51.6	14.085	14.9102	12.7334	13.9402	16.5732	17.6802	35.8037	36.5802	58.1943	59.6502	95.2021	95.8102
51.7	14.085	14.9102	12.7334	13.9402	16.585	17.6802	35.8037	36.5802	58.1826	59.6502	95.1943	95.8102
51.8	14.0791	14.9102	12.7275	13.9402	16.5791	17.6802	35.7979	36.5802	58.1689	59.6502	95.1768	95.8102
51.9	14.0791	14.9102	12.7275	13.9402	16.5674	17.6802	35.7979	36.5802	58.1689	59.6502	95.1689	95.8102
52	14.0801	14.9102	12.7168	13.9402	16.5684	17.6802	35.8105	36.5802	58.1699	59.6502	95.1582	95.8102
52.1	14.0801	14.9102	12.7168	13.9402	16.5684	17.6802	35.8105	36.5802	58.1699	59.6502	95.1465	95.8102
52.2	14.0684	14.9102	12.7168	13.9402	16.5684	17.6802	35.7988	36.5802	58.1699	59.6502	95.1465	95.8102
52.3	14.0703	14.9102	12.7188	13.9402	16.5703	17.6802	35.8008	36.5802	58.1602	59.6502	95.1406	95.8102
52.4	14.0723	14.9102	12.7207	13.9402	16.5723	17.6802	35.8027	36.5802	58.1621	59.6502	95.1309	95.8102
52.5	14.0684	14.9102	12.7168	13.9402	16.5684	17.6802	35.7871	36.5802	58.1582	59.6502	95.1191	95.8102
52.6	14.0684	14.9102	12.709	13.9402	16.5566	17.6802	35.7988	36.5802	58.1504	59.6502	95.1191	95.8102
52.7	14.0732	14.9102	12.7217	13.9402	16.5615	17.6802	35.8037	36.5802	58.1553	59.6502	95.1123	95.8102
52.8	14.0703	14.9102	12.7188	13.9402	16.5508	17.6802	35.8008	36.5802	58.1523	59.6502	95.1094	95.8102
52.9	14.0703	14.9102	12.7188	13.9402	16.5508	17.6802	35.8008	36.5802	58.1523	59.6502	95.1094	95.8102
53	14.0732	14.9102	12.7139	13.9402	16.5537	17.6802	35.8037	36.5802	58.1436	59.6502	95.1123	95.8102
53.1	14.0703	14.9102	12.7109	13.9402	16.5391	17.6802	35.8008	36.5802	58.1406	59.6502	95.1094	95.8102
53.2	14.0703	14.9102	12.7109	13.9402	16.5391	17.6802	35.8125	36.5802	58.1328	59.6502	95.1016	95.8102
53.3	14.0684	14.9102	12.709	13.9402	16.5371	17.6802	35.8184	36.5802	58.1309	59.6502	95.0996	95.8102
53.4	14.0713	14.9102	12.7119	13.9402	16.54	17.6802	35.8213	36.5802	58.1338	59.6502	95.1025	95.8102
53.5	14.0703	14.9102	12.7109	13.9402	16.5313	17.6802	35.8203	36.5802	58.1211	59.6502	95.0898	95.8102
53.6	14.0625	14.9102	12.7109	13.9402	16.5313	17.6802	35.8203	36.5802	58.1211	59.6502	95.0898	95.8102
53.7	14.0605	14.9102	12.709	13.9402	16.5293	17.6802	35.8301	36.5802	58.1191	59.6502	95.0879	95.8102
53.8	14.0605	14.9102	12.709	13.9402	16.5293	17.6802	35.8379	36.5802	58.1113	59.6502	95.0879	95.8102
53.9	14.0625	14.9102	12.7109	13.9402	16.5313	17.6802	35.8398	36.5802	58.1133	59.6502	95.0898	95.8102
54	14.0703	14.9102	12.707	13.9402	16.5273	17.6802	35.8477	36.5802	58.1211	59.6502	95.0898	95.8102
54.1	14.0723	14.9102	12.709	13.9402	16.5293	17.6802	35.8613	36.5802	58.1113	59.6502	95.0996	95.8102
54.2	14.0723	14.9102	12.709	13.9402	16.5293	17.6802	35.8809	36.5802	58.1113	59.6502	95.0918	95.8102
54.3	14.0752	14.9102	12.7119	13.9402	16.5322	17.6802	35.8838	36.5802	58.1143	59.6502	95.0947	95.8102
54.4	14.0771	14.9102	12.7139	13.9402	16.5264	17.6802	35.8936	36.5802	58.1045	59.6502	95.0967	95.8102
54.5	14.0771	14.9102	12.7139	13.9402	16.5264	17.6802	35.9248	36.5802	58.1045	59.6502	95.0967	95.8102
54.6	14.0654	14.9102	12.7139	13.9402	16.5264	17.6802	35.917	36.5802	58.0967	59.6502	95.0967	95.8102
54.7	14.0635	14.9102	12.7119	13.9402	16.5244	17.6802	35.9346	36.5802	58.0947	59.6502	95.0947	95.8102
54.8	14.0684	14.9102	12.7051	13.9402	16.5176	17.6802	35.9199	36.5802	58.0996	59.6502	95.0996	95.8102
54.9	14.0664	14.9102	12.7031	13.9402	16.5156	17.6802	35.918	36.5802	58.0977	59.6502	95.0977	95.8102
55	14.0654	14.9102	12.71	13.9402	16.5225	17.6802	35.9326	36.5802	58.1045	59.6502	95.1045	95.8102
55.1	14.0713	14.9102	12.708	13.9402	16.5205	17.6802	35.9229	36.5802	58.0908	59.6502	95.1025	95.8102
55.2	14.0635	14.9102	12.708	13.9402	16.5205	17.6802	35.9307	36.5802	58.0908	59.6502	95.0908	95.8102
55.3	14.0654	14.9102	12.7021	13.9402	16.5107	17.6802	35.9131	36.5802	58.0928	59.6502	95.0928	95.8102
55.4	14.0674	14.9102	12.7041	13.9402	16.5127	17.6802	35.915	36.5802	58.0947	59.6502	95.0947	95.8102
55.5	14.0557	14.9102	12.6924	13.9402	16.4932	17.6802	35.9033	36.5802	58.083	59.6502	95.0713	95.8102
55.6	14.0391	14.9102	12.6875	13.9402	16.4883	17.6802	35.8984	36.5802	58.0781	59.6502	95.0664	95.8102
55.7	14.041	14.9102	12.6895	13.9402	16.4902	17.6802	35.9004	36.5802	58.0801	59.6502	95.0684	95.8102
55.8	14.0342	14.9102	12.6826	13.9402	16.4834	17.6802	35.9053	36.5802	58.0732	59.6502	95.0537	95.8102
55.9	14.0342	14.9102	12.6826	13.9402	16.4834	17.6802	35.874	36.5802	58.0732	59.6502	95.0537	95.8102
56	14.0313	14.9102	12.6797	13.9402	16.4805	17.6802	35.8711	36.5802	58.0703	59.6502	95.0391	95.8102
56.1	14.0195	14.9102	12.6797	13.9402	16.4688	17.6802	35.8711	36.5802	58.0625	59.6502	95.0391	95.8102
56.2	14.0117	14.9102	12.6719	13.9402	16.4609	17.6802	35.8711	36.5802	58.0547	59.6502	95.0313	95.8102
56.3	14.0127	14.9102	12.6729	13.9402	16.4619	17.6802	35.8721	36.5802	58.0557	59.6502	95.0322	95.8102
56.4	14.0049	14.9102	12.6729	13.9402	16.4619	17.6802	35.8721	36.5802	58.0557	59.6502	95.0322	95.8102
56.5	13.999	14.9102	12.667	13.9402	16.4561	17.6802	35.8584	36.5802	58.0381	59.6502	95.0264	95.8102
56.6	14.002	14.9102	12.6582	13.9402	16.459	17.6802	35.8691	36.5802	58.041	59.6502	95.0293	95.8102
56.7	13.999	14.9102	12.6553	13.9402	16.4561	17.6802	35.8779	36.5802	58.0381	59.6502	95.0264	95.8102
56.8	14.002	14.9102	12.6582	13.9402	16.459	17.6802	35.8691	36.5802	58.041	59.6502	95.0215	95.8102
56.9	13.9971	14.9102	12.6455	13.9402	16.4463	17.6802	35.8564	36.5802	58.0361	59.6502	95.0166	95.8102
57	13.9893	14.9102	12.6494	13.9402	16.4502	17.6802	35.8682	36.5802	58.0322	59.6502	95.0088	95.8102
57.1	13.9814	14.9102	12.6299	13.9402	16.4424	17.6802	35.8408	36.5802	58.0244	59.6502	95.001	95.8102
57.2	13.9746	14.9102	12.6309	13.9402	16.4434	17.6802	35.8223	36.5802	58.0254	59.6502	95.002	95.8102
57.3	13.9766	14.9102	12.6328	13.9402	16.4336	17.6802	35.8164	36.5802	58.0273	59.6502	94.9961	95.8102
57.4	13.9668	14.9102	12.623	13.9402	16.4238	17.6802	35.7949	36.5802	58.0059	59.6502	94.9863	95.8102
57.5	13.9639	14.9102	12.6201	13.9402	16.4209	17.6802	35.7842	36.5802	58.0029	59.6502	94.9717	95.8102
57.6	13.9688	14.9102	12.625	13.9402	16.4258	17.6802	35.7969	36.5802	58.0078	59.6502	94.9766	95.8102
57.7	13.9756	14.9102	12.624	13.9402	16.4326	17.6802	35.8154	36.5802	58.0146	59.6502	94.9834	95.8102
57.8	13.9658	14.9102	12.626	13.9402	16.4346	17.6802	35.7979	36.5802	58.0166	59.6502	94.9854	95.8102
57.9	13.9688	14.9102	12.6289	13.9402	16.4375	17.6802	35.7891	36.5802	58.0195	59.6502	94.9883	95.8102
58	13.9609	14.9102	12.6094	13.9402	16.4297	17.6802	35.8516	36.5802	58.0117	59.6502	94.9805	95.8102
58.1	13.9609	14.9102	12.6172	13.9402	16.4375	17.6802	35.8281	36.5802	58.0195	59.6502	94.9766	95.8102
58.2	13.9443	14.9102	12.6123	13.9402	16.4248	17.6802	35.7959	36.5802	58.0146	59.6502	94.9639	95.8102
58.3	13.9355	14.9102	12.5957	13.9402	16.416	17.6802	35.7949	36.5802	58.0059	59.6502	94.9551	95.8102
58.4	13.9277	14.9102	12.5957	13.9402	16.416	17.6802	35.8145	36.5802	58.0059	59.6502	94.9355	95.8102
58.5	13.9336	14.9102	12.6016	13.9402	16.4219	17.6802	35.8438	36.5802	58.0117	59.6502	94.9414	95.8102
58.6	13.9287	14.9102	12.6084	13.9402	16.4287	17.6802	35.8584	36.5802	58.0186	59.6502	94.9365	95.8102
58.7	13.9365	14.9102	12.6045	13.9402	16.4248	17.6802	35.8662	36.5802	58.0264	59.6502	94.9248	95.8102
58.8	13.9287	14.9102	12.6084	13.9402	16.4287	17.6802	35.8271	36.5802	58.0186	59.6502	94.8975	95.8102
58.9	13.9189	14.9102	12.5986	13.9402	16.4072	17.6802	35.8291	36.5802	58.0088	59.6502	94.8682	95.8102
59	13.9277	14.9102	12.584	13.9402	16.4043	17.6802	35.8262	36.5802	58.0059	59.6502	94.8652	95.8102
59.1	13.8916	14.9102	12.5479	13.9402	16.3799	17.6802	35.7822	36.5802	57.9814	59.6502	94.8408	95.8102
59.2	13.8838	14.9102	12.5518	13.9402	16.3721	17.6802	35.7939	36.5802	57.9619	59.6502	94.8525	95.8102
59.3	13.8984	14.9102	12.5547	13.9402	16.3867	17.6802	35.7461	36.5802	57.957	59.6502	94.875	95.8102
59.4	13.8965	14.9102	12.5254	13.9402	16.3848	17.6802	35.7051	36.5802	57.9277	59.6502	94.8652	95.8102
59.5	13.8965	14.9102	12.5332	13.9402	16.3848	17.6802	35.6777	36.5802	57.916	59.6502	94.8652	95.8102
59.6	13.916	14.9102	12.5254	13.9402	16.3965	17.6802	35.627	36.5802	57.9277	59.6502	94.8457	95.8102
59.7	13.9727	14.9102	12.5391	13.9402	16.4414	17.6802	35.6406	36.5802	57.9609	59.6502	94.8906	95.8102
59.8	13.8916	14.9102	12.4307	13.9402	16.3408	17.6802	35.501	36.5802	57.8721	59.6502	94.8291	95.8102
59.9	14.0186	14.9102	12.4248	13.9402	16.3975	17.6802	35.667	36.5802	57.9795	59.6502	94.9365	95.8102
60	14.1875	14.9102	12.4258	13.9402	16.668	17.6802	36.0078	36.5802	56.668	59.6502	95.2383	95.8102
60.1	13.0537	14.9102	4.52247	0.000211084	11.3115	17.6802	28.7022	36.5802	10.6631	0.000211098	85.2022	95.8102
60.2	-0.197295	0.000211092	-1.93167	0.000211082	-1.1387	0.000211068	0.771455	0.000211096	-1.16604	0.000211096	11.0918	0.000211099
60.3	-1.33204	0.00021109	-1.57423	0.000211079	-1.27345	0.000211066	-1.23048	0.000211094	-1.46095	0.000211094	-0.820325	0.000211097
60.4	-1.83691	0.000211087	-1.77832	0.000211077	-1.46582	0.000211063	-1.64551	0.000211091	-1.82519	0.000211091	-1.35644	0.000211095
60.5	-1.62598	0.000211085	-1.68848	0.000211075	-1.40723	0.000211061	-1.42676	0.000211089	-1.58692	0.000211089	-1.3291	0.000211092
60.6	-1.69629	0.000211083	-1.77832	0.000211073	-1.37598	0.000211059	-1.5166	0.000211087	-1.60644	0.000211087	-1.24707	0.00021109
60.7	-1.72266	0.000211081	-1.75391	0.00021107	-1.34375	0.000211057	-1.61328	0.000211085	-1.62109	0.000211085	-1.37109	0.000211088
60.8	-1.71289	0.000211079	-1.74414	0.000211068	-1.35351	0.000211054	-1.6543	0.000211083	-1.66211	0.000211082	-1.41211	0.000211086
60.9	-1.7334	0.000211076	-1.74512	0.000211066	-1.33496	0.000211052	-1.62402	0.00021108	-1.66309	0.00021108	-1.44434	0.000211083
61	-1.75684	0.000211074	-1.76074	0.000211064	-1.35059	0.00021105	-1.63965	0.000211078	-1.66699	0.000211078	-1.49121	0.000211081
61.1	-1.7666	0.000211072	-1.75879	0.000211062	-1.3252	0.000211048	-1.60645	0.000211076	-1.66504	0.000211076	-1.49707	0.000211079
61.2	-1.75293	0.00021107	-1.75684	0.000211059	-1.30371	0.000211045	-1.60449	0.000211074	-1.66309	0.000211073	-1.53418	0.000211077
61.3	-1.76562	0.000211067	-1.75781	0.000211057	-1.31641	0.000211043	-1.625	0.000211071	-1.66406	0.000211071	-1.55469	0.000211074
61.4	-1.74121	0.000211065	-1.7334	0.000211055	-1.29199	0.000211041	-1.60059	0.000211069	-1.6709	0.000211069	-1.52246	0.000211072
61.5	-1.73828	0.000211063	-1.74219	0.000211053	-1.30859	0.000211039	-1.60937	0.000211067	-1.66016	0.000211067	-1.57031	0.00021107
61.6	-1.70996	0.000211061	-1.72949	0.00021105	-1.28809	0.000211036	-1.57715	0.000211065	-1.64746	0.000211064	-1.53809	0.000211068
61.7	-1.69141	0.000211058	-1.75391	0.000211048	-1.29297	0.000211034	-1.57031	0.000211062	-1.64062	0.000211062	-1.53125	0.000211066
61.8	-1.67969	0.000211056	-1.75	0.000211046	-1.28125	0.000211032	-1.57031	0.00021106	-1.62891	0.00021106	-1.51953	0.000211063
61.9	-1.64746	0.000211054	-1.72949	0.000211044	-1.26856	0.00021103	-1.55762	0.000211058	-1.6084	0.000211058	-1.48731	0.000211061
62	-1.65625	0.000211052	-1.73828	0.000211041	-1.26562	0.000211028	-1.56641	0.000211056	-1.625	0.000211055	-1.50781	0.000211059
62.1	-1.6416	0.000211049	-1.72363	0.000211039	-1.25098	0.000211025	-1.58301	0.000211053	-1.62207	0.000211053	-1.49316	0.000211057
62.2	-1.62988	0.000211047	-1.69238	0.000211037	-1.23145	0.000211023	-1.59082	0.000211051	-1.5791	0.000211051	-1.48145	0.000211054
62.3	-1.60547	0.000211045	-1.66797	0.000211035	-1.22656	0.000211021	-1.59766	0.000211049	-1.56641	0.000211049	-1.49609	0.000211052
62.4	-1.59863	0.000211043	-1.64941	0.000211032	-1.20801	0.000211019	-1.59863	0.000211047	-1.56738	0.000211047	-1.50879	0.00021105
62.5	-1.58594	0.00021104	-1.63672	0.00021103	-1.20703	0.000211016	-1.58594	0.000211045	-1.55469	0.000211044	-1.50781	0.000211048
62.6	-1.58984	0.000211038	-1.64453	0.000211028	-1.19141	0.000211014	-1.58984	0.000211042	-1.55078	0.000211042	-1.51172	0.000211045
62.7	-1.58398	0.000211036	-1.64648	0.000211026	-1.20508	0.000211012	-1.5957	0.00021104	-1.55273	0.00021104	-1.52539	0.000211043
62.8	-1.57812	0.000211034	-1.64062	0.000211023	-1.19922	0.00021101	-1.59766	0.000211038	-1.55859	0.000211038	-1.53906	0.000211041
62.9	-1.56445	0.000211032	-1.63477	0.000211021	-1.19336	0.000211007	-1.5957	0.000211036	-1.54492	0.000211035	-1.52539	0.000211039
63	-1.56152	0.000211029	-1.63574	0.000211019	-1.19434	0.000211005	-1.58496	0.000211033	-1.54199	0.000211033	-1.51465	0.000211036
63.1	-1.55078	0.000211027	-1.625	0.000211017	-1.19141	0.000211003	-1.58203	0.000211031	-1.54297	0.000211031	-1.51172	0.000211034
63.2	-1.56055	0.000211025	-1.61914	0.000211015	-1.18945	0.000211001	-1.58008	0.000211029	-1.54883	0.000211029	-1.50977	0.000211032
63.3	-1.53809	0.000211023	-1.6084	0.000211012	-1.16699	0.000210998	-1.55762	0.000211027	-1.52637	0.000211026	-1.50684	0.00021103
63.4	-1.53125	0.00021102	-1.59375	0.00021101	-1.15234	0.000210996	-1.55078	0.000211024	-1.51172	0.000211024	-1.51172	0.000211027
63.5	-1.52441	0.000211018	-1.59473	0.000211008	-1.15332	0.000210994	-1.55566	0.000211022	-1.5127	0.000211022	-1.50488	0.000211025
63.6	-1.50977	0.000211016	-1.58008	0.000211006	-1.13867	0.000210992	-1.54883	0.00021102	-1.49805	0.00021102	-1.49805	0.000211023
63.7	-1.50586	0.000211014	-1.56836	0.000211003	-1.13867	0.00021099	-1.53711	0.000211018	-1.49805	0.000211017	-1.49805	0.000211021
63.8	-1.50488	0.000211011	-1.56348	0.000211001	-1.12598	0.000210987	-1.52441	0.000211015	-1.48145	0.000211015	-1.49316	0.000211019
63.9	-1.50098	0.000211009	-1.56348	0.000210999	-1.12207	0.000210985	-1.5127	0.000211013	-1.48145	0.000211013	-1.50098	0.000211016
64	-1.48535	0.000211007	-1.54785	0.000210997	-1.10645	0.000210983	-1.50488	0.000211011	-1.47363	0.000211011	-1.49707	0.000211014
64.1	-1.47754	0.000211005	-1.54785	0.000210994	-1.10645	0.000210981	-1.49707	0.000211009	-1.47754	0.000211009	-1.49707	0.000211012
64.2	-1.46777	0.000211002	-1.53027	0.000210992	-1.10059	0.000210978	-1.47949	0.000211006	-1.45996	0.000211006	-1.47949	0.00021101
64.3	-1.46777	0.000211	-1.53027	0.00021099	-1.09668	0.000210976	-1.47559	0.000211004	-1.45605	0.000211004	-1.47949	0.000211007
64.4	-1.4707	0.000210998	-1.52148	0.000210988	-1.0918	0.000210974	-1.48242	0.000211002	-1.45117	0.000211002	-1.48242	0.000211005
64.5	-1.45898	0.000210996	-1.52148	0.000210985	-1.0918	0.000210972	-1.45898	0.000211	-1.44727	0.000211	-1.47852	0.000211003
64.6	-1.46582	0.000210994	-1.50879	0.000210983	-1.08691	0.000210969	-1.45801	0.000210998	-1.44629	0.000210997	-1.47754	0.000211001
64.7	-1.45117	0.000210991	-1.50195	0.000210981	-1.08008	0.000210967	-1.45117	0.000210995	-1.43945	0.000210995	-1.48242	0.000210998
64.8	-1.4375	0.000210989	-1.5	0.000210979	-1.07813	0.000210965	-1.4375	0.000210993	-1.4375	0.000210993	-1.46875	0.000210996
64.9	-1.43066	0.000210987	-1.49316	0.000210977	-1.06348	0.000210963	-1.42285	0.000210991	-1.43066	0.000210991	-1.47363	0.000210994
65	-1.42969	0.000210985	-1.48828	0.000210974	-1.05859	0.00021096	-1.41016	0.000210989	-1.42969	0.000210988	-1.46875	0.000210992
65.1	-1.42383	0.000210982	-1.48633	0.000210972	-1.05664	0.000210958	-1.4043	0.000210986	-1.42383	0.000210986	-1.47461	0.000210989
65.2	-1.41992	0.00021098	-1.47852	0.00021097	-1.06055	0.000210956	-1.40039	0.000210984	-1.41602	0.000210984	-1.4707	0.000210987
65.3	-1.41406	0.000210978	-1.47656	0.000210968	-1.04688	0.000210954	-1.39453	0.000210982	-1.42188	0.000210982	-1.46484	0.000210985
65.4	-1.41016	0.000210976	-1.46484	0.000210965	-1.04297	0.000210951	-1.38281	0.00021098	-1.42188	0.000210979	-1.46094	0.000210983
65.5	-1.40723	0.000210973	-1.45801	0.000210963	-1.04785	0.000210949	-1.39551	0.000210977	-1.40723	0.000210977	-1.44629	0.000210981
65.6	-1.40918	0.000210971	-1.45215	0.000210961	-1.03809	0.000210947	-1.37793	0.000210975	-1.39746	0.000210975	-1.44043	0.000210978
65.7	-1.40039	0.000210969	-1.46289	0.000210959	-1.04102	0.000210945	-1.38086	0.000210973	-1.4082	0.000210973	-1.45117	0.000210976
65.8	-1.39355	0.000210967	-1.45605	0.000210956	-1.03418	0.000210943	-1.37402	0.000210971	-1.39355	0.00021097	-1.43652	0.000210974
65.9	-1.3877	0.000210964	-1.44629	0.000210954	-1.02832	0.00021094	-1.36816	0.000210968	-1.39551	0.000210968	-1.42676	0.000210972
66	-1.38281	0.000210962	-1.44531	0.000210952	-1.03516	0.000210938	-1.35156	0.000210966	-1.39453	0.000210966	-1.42578	0.000210969
66.1	-1.37402	0.00021096	-1.42871	0.00021095	-1.02637	0.000210936	-1.34668	0.000210964	-1.38574	0.000210964	-1.40527	0.000210967
66.2	-1.37598	0.000210958	-1.42676	0.000210947	-1.03613	0.000210934	-1.35645	0.000210962	-1.37598	0.000210962	-1.41504	0.000210965
66.3	-1.38184	0.000210955	-1.4248	0.000210945	-1.03418	0.000210931	-1.35059	0.00021096	-1.38184	0.000210959	-1.41309	0.000210963
66.4	-1.37207	0.000210953	-1.42676	0.000210943	-1.02441	0.000210929	-1.34473	0.000210957	-1.37207	0.000210957	-1.40332	0.00021096
66.5	-1.36914	0.000210951	-1.41992	0.000210941	-1.01758	0.000210927	-1.33789	0.000210955	-1.36914	0.000210955	-1.38867	0.000210958
66.6	-1.36035	0.000210949	-1.41504	0.000210939	-1.0127	0.000210925	-1.34082	0.000210953	-1.36035	0.000210953	-1.3916	0.000210956
66.7	-1.35547	0.000210947	-1.40625	0.000210936	-1.00391	0.000210922	-1.33594	0.000210951	-1.36328	0.00021095	-1.375	0.000210954
66.8	-1.34863	0.000210944	-1.41113	0.000210934	-1.00879	0.00021092	-1.34082	0.000210948	-1.36035	0.000210948	-1.37207	0.000210951
66.9	-1.34375	0.000210942	-1.41406	0.000210932	-1.00391	0.000210918	-1.33203	0.000210946	-1.35156	0.000210946	-1.36328	0.000210949
67	-1.33691	0.00021094	-1.40723	0.00021093	-1.00879	0.000210916	-1.3291	0.000210944	-1.35645	0.000210944	-1.37988	0.000210947
67.1	-1.32715	0.000210938	-1.40137	0.000210927	-0.999023	0.000210913	-1.31934	0.000210942	-1.35059	0.000210941	-1.37012	0.000210945
67.2	-1.32422	0.000210935	-1.40625	0.000210925	-0.996094	0.000210911	-1.3125	0.000210939	-1.34375	0.000210939	-1.36328	0.000210943
67.3	-1.31445	0.000210933	-1.4082	0.000210923	-0.998047	0.000210909	-1.30664	0.000210937	-1.33398	0.000210937	-1.35742	0.00021094
67.4	-1.31641	0.000210931	-1.39844	0.000210921	-0.988281	0.000210907	-1.29688	0.000210935	-1.32813	0.000210935	-1.35938	0.000210938
67.5	-1.31152	0.000210929	-1.39355	0.000210918	-0.991211	0.000210905	-1.2998	0.000210933	-1.33105	0.000210932	-1.35059	0.000210936
67.6	-1.30273	0.000210926	-1.39648	0.000210916	-0.99414	0.000210902	-1.29492	0.00021093	-1.32227	0.00021093	-1.3457	0.000210934
67.7	-1.29785	0.000210924	-1.3877	0.000210914	-0.989258	0.0002109	-1.29785	0.000210928	-1.3252	0.000210928	-1.34863	0.000210931
67.8	-1.2998	0.000210922	-1.38184	0.000210912	-0.979492	0.000210898	-1.28809	0.000210926	-1.31934	0.000210926	-1.33887	0.000210929
67.9	-1.29395	0.00021092	-1.3877	0.000210909	-0.985352	0.000210896	-1.29395	0.000210924	-1.3252	0.000210924	-1.34473	0.000210927
68	-1.29297	0.000210917	-1.38281	0.000210907	-0.992188	0.000210893	-1.29297	0.000210922	-1.32031	0.000210921	-1.34375	0.000210925
68.1	-1.28418	0.000210915	-1.38574	0.000210905	-0.983398	0.000210891	-1.2959	0.000210919	-1.32324	0.000210919	-1.33496	0.000210922
68.2	-1.29395	0.000210913	-1.38379	0.000210903	-0.985352	0.000210889	-1.30566	0.000210917	-1.3252	0.000210917	-1.33301	0.00021092
68.3	-1.29687	0.000210911	-1.38672	0.000210901	-0.988281	0.000210887	-1.31641	0.000210915	-1.32812	0.000210915	-1.32812	0.000210918
68.4	-1.28516	0.000210909	-1.37891	0.000210898	-0.988282	0.000210884	-1.31641	0.000210913	-1.31641	0.000210912	-1.31641	0.000210916
68.5	-1.28223	0.000210906	-1.37207	0.000210896	-0.981445	0.000210882	-1.32129	0.00021091	-1.32129	0.00021091	-1.31348	0.000210913
68.6	-1.27734	0.000210904	-1.37891	0.000210894	-0.988281	0.00021088	-1.30859	0.000210908	-1.31641	0.000210908	-1.32031	0.000210911
68.7	-1.26953	0.000210902	-1.37109	0.000210892	-0.980469	0.000210878	-1.30859	0.000210906	-1.31641	0.000210906	-1.32031	0.000210909
68.8	-1.27539	0.0002109	-1.37695	0.000210889	-0.986328	0.000210875	-1.31445	0.000210904	-1.31445	0.000210903	-1.32617	0.000210907
68.9	-1.27539	0.000210897	-1.36523	0.000210887	-0.986328	0.000210873	-1.31445	0.000210901	-1.31445	0.000210901	-1.31445	0.000210904
69	-1.26758	0.000210895	-1.36914	0.000210885	-0.978516	0.000210871	-1.31836	0.000210899	-1.30664	0.000210899	-1.31836	0.000210902
69.1	-1.26953	0.000210893	-1.37109	0.000210883	-0.980469	0.000210869	-1.3125	0.000210897	-1.30078	0.000210897	-1.3125	0.0002109
69.2	-1.25293	0.000210891	-1.36621	0.00021088	-0.975586	0.000210867	-1.30371	0.000210895	-1.30371	0.000210894	-1.31543	0.000210898
69.3	-1.25488	0.000210888	-1.35645	0.000210878	-0.977539	0.000210864	-1.30566	0.000210892	-1.30566	0.000210892	-1.30566	0.000210896
69.4	-1.26074	0.000210886	-1.3623	0.000210876	-0.983398	0.000210862	-1.2998	0.00021089	-1.2998	0.00021089	-1.31152	0.000210893
69.5	-1.24902	0.000210884	-1.3623	0.000210874	-0.97168	0.00021086	-1.29199	0.000210888	-1.2998	0.000210888	-1.31152	0.000210891
69.6	-1.25195	0.000210882	-1.35742	0.000210871	-0.974609	0.000210858	-1.2832	0.000210886	-1.29492	0.000210886	-1.31445	0.000210889
69.7	-1.24414	0.000210879	-1.35742	0.000210869	-0.974609	0.000210855	-1.2832	0.000210884	-1.29492	0.000210883	-1.30664	0.000210887
69.8	-1.24805	0.000210877	-1.36133	0.000210867	-0.978516	0.000210853	-1.28711	0.000210881	-1.29883	0.000210881	-1.29883	0.000210884
69.9	-1.24219	0.000210875	-1.35547	0.000210865	-0.984375	0.000210851	-1.29297	0.000210879	-1.29297	0.000210879	-1.30469	0.000210882
70	-1.23438	0.000210873	-1.34375	0.000210863	-0.984375	0.000210849	-1.29297	0.000210877	-1.29297	0.000210877	-1.29297	0.00021088
70.1	-1.23926	0.000210871	-1.36035	0.00021086	-0.989258	0.000210846	-1.30957	0.000210875	-1.29785	0.000210874	-1.29004	0.000210878
70.2	-1.22754	0.000210868	-1.34863	0.000210858	-0.989258	0.000210844	-1.29785	0.000210872	-1.29004	0.000210872	-1.29004	0.000210875
70.3	-1.22559	0.000210866	-1.34668	0.000210856	-0.979492	0.000210842	-1.2959	0.00021087	-1.28809	0.00021087	-1.28809	0.000210873
70.4	-1.21973	0.000210864	-1.34863	0.000210854	-0.981446	0.00021084	-1.29004	0.000210868	-1.27832	0.000210868	-1.27832	0.000210871
70.5	-1.21973	0.000210862	-1.34863	0.000210851	-0.969726	0.000210837	-1.29004	0.000210866	-1.27832	0.000210865	-1.27832	0.000210869
70.6	-1.22168	0.000210859	-1.34277	0.000210849	-0.97168	0.000210835	-1.29199	0.000210863	-1.26855	0.000210863	-1.29199	0.000210866
70.7	-1.20996	0.000210857	-1.34277	0.000210847	-0.97168	0.000210833	-1.28027	0.000210861	-1.26855	0.000210861	-1.28027	0.000210864
70.8	-1.20996	0.000210855	-1.34277	0.000210845	-0.97168	0.000210831	-1.28027	0.000210859	-1.26855	0.000210859	-1.29199	0.000210862
70.9	-1.20996	0.000210853	-1.34277	0.000210842	-0.959961	0.000210829	-1.28027	0.000210857	-1.26855	0.000210856	-1.29199	0.00021086
71	-1.20703	0.00021085	-1.33594	0.00021084	-0.964844	0.000210826	-1.28516	0.000210854	-1.26562	0.000210854	-1.29687	0.000210858
71.1	-1.20996	0.000210848	-1.33887	0.000210838	-0.959961	0.000210824	-1.28027	0.000210852	-1.26855	0.000210852	-1.28809	0.000210855
71.2	-1.20703	0.000210846	-1.32813	0.000210836	-0.957031	0.000210822	-1.27734	0.00021085	-1.25391	0.00021085	-1.29688	0.000210853
71.3	-1.2002	0.000210844	-1.34082	0.000210833	-0.950195	0.00021082	-1.28223	0.000210848	-1.25879	0.000210848	-1.29004	0.000210851
71.4	-1.19727	0.000210841	-1.33008	0.000210831	-0.947266	0.000210817	-1.2793	0.000210846	-1.25586	0.000210845	-1.2793	0.000210849
71.5	-1.18652	0.000210839	-1.31934	0.000210829	-0.948242	0.000210815	-1.28809	0.000210843	-1.24902	0.000210843	-1.28027	0.000210846
71.6	-1.18652	0.000210837	-1.31934	0.000210827	-0.94043	0.000210813	-1.28027	0.000210841	-1.24902	0.000210841	-1.26855	0.000210844
71.7	-1.17871	0.000210835	-1.31152	0.000210825	-0.94043	0.000210811	-1.28809	0.000210839	-1.24902	0.000210839	-1.26074	0.000210842
71.8	-1.17871	0.000210833	-1.2998	0.000210822	-0.94043	0.000210808	-1.28809	0.000210837	-1.24902	0.000210836	-1.24902	0.00021084
71.9	-1.17676	0.00021083	-1.29785	0.00021082	-0.938477	0.000210806	-1.27832	0.000210834	-1.24707	0.000210834	-1.24707	0.000210837
72	-1.18359	0.000210828	-1.29687	0.000210818	-0.945312	0.000210804	-1.29297	0.000210832	-1.24219	0.000210832	-1.24609	0.000210835
72.1	-1.18164	0.000210826	-1.2832	0.000210816	-0.943359	0.000210802	-1.29102	0.00021083	-1.24023	0.00021083	-1.24414	0.000210833
72.2	-1.17188	0.000210824	-1.28516	0.000210813	-0.945313	0.000210799	-1.29297	0.000210828	-1.24219	0.000210827	-1.23438	0.000210831
72.3	-1.17188	0.000210821	-1.28516	0.000210811	-0.945313	0.000210797	-1.28516	0.000210825	-1.23438	0.000210825	-1.23438	0.000210828
72.4	-1.16211	0.000210819	-1.27148	0.000210809	-0.931641	0.000210795	-1.2832	0.000210823	-1.23242	0.000210823	-1.23242	0.000210826
72.5	-1.16211	0.000210817	-1.26367	0.000210807	-0.931641	0.000210793	-1.2832	0.000210821	-1.2207	0.000210821	-1.2207	0.000210824
72.6	-1.16504	0.000210815	-1.2666	0.000210804	-0.93457	0.000210791	-1.28613	0.000210819	-1.22363	0.000210818	-1.21582	0.000210822
72.7	-1.16699	0.000210812	-1.26855	0.000210802	-0.936523	0.000210788	-1.27637	0.000210816	-1.22559	0.000210816	-1.21777	0.00021082
72.8	-1.15234	0.00021081	-1.25391	0.0002108	-0.933594	0.000210786	-1.26172	0.000210814	-1.22266	0.000210814	-1.21484	0.000210817
72.9	-1.15234	0.000210808	-1.25391	0.000210798	-0.933594	0.000210784	-1.25391	0.000210812	-1.22266	0.000210812	-1.21484	0.000210815
73	-1.15527	0.000210806	-1.25684	0.000210795	-0.936523	0.000210782	-1.25684	0.00021081	-1.21777	0.00021081	-1.21777	0.000210813
73.1	-1.14746	0.000210803	-1.24902	0.000210793	-0.936524	0.000210779	-1.26465	0.000210808	-1.21777	0.000210807	-1.20605	0.000210811
73.2	-1.14648	0.000210801	-1.24805	0.000210791	-0.935547	0.000210777	-1.26367	0.000210805	-1.2168	0.000210805	-1.20508	0.000210808
73.3	-1.14746	0.000210799	-1.2373	0.000210789	-0.928711	0.000210775	-1.27637	0.000210803	-1.20605	0.000210803	-1.20605	0.000210806
73.4	-1.14941	0.000210797	-1.23926	0.000210787	-0.930664	0.000210773	-1.2666	0.000210801	-1.20801	0.000210801	-1.20801	0.000210804
73.5	-1.14941	0.000210795	-1.23926	0.000210784	-0.930664	0.00021077	-1.2666	0.000210799	-1.20801	0.000210798	-1.2002	0.000210802
73.6	-1.13574	0.000210792	-1.2373	0.000210782	-0.916992	0.000210768	-1.25684	0.000210796	-1.19434	0.000210796	-1.19824	0.000210799
73.7	-1.1377	0.00021079	-1.23145	0.00021078	-0.918945	0.000210766	-1.2666	0.000210794	-1.20801	0.000210794	-1.2002	0.000210797
73.8	-1.1377	0.000210788	-1.23145	0.000210778	-0.918945	0.000210764	-1.2666	0.000210792	-1.19629	0.000210792	-1.2002	0.000210795
73.9	-1.13281	0.000210786	-1.23438	0.000210775	-0.921875	0.000210762	-1.26172	0.00021079	-1.19922	0.000210789	-1.20313	0.000210793
74	-1.11914	0.000210783	-1.2207	0.000210773	-0.919922	0.000210759	-1.24023	0.000210787	-1.18945	0.000210787	-1.18945	0.000210791
74.1	-1.12109	0.000210781	-1.22266	0.000210771	-0.921875	0.000210757	-1.23047	0.000210785	-1.19141	0.000210785	-1.19141	0.000210788
74.2	-1.11914	0.000210779	-1.2207	0.000210769	-0.919922	0.000210755	-1.24023	0.000210783	-1.18945	0.000210783	-1.18945	0.000210786
74.3	-1.12012	0.000210777	-1.22168	0.000210766	-0.920899	0.000210753	-1.22949	0.000210781	-1.19043	0.00021078	-1.18262	0.000210784
74.4	-1.10645	0.000210774	-1.20801	0.000210764	-0.918946	0.00021075	-1.22754	0.000210778	-1.18848	0.000210778	-1.18066	0.000210782
74.5	-1.10352	0.000210772	-1.21289	0.000210762	-0.923828	0.000210748	-1.23242	0.000210776	-1.19336	0.000210776	-1.17383	0.000210779
74.6	-1.10352	0.00021077	-1.21289	0.00021076	-0.912109	0.000210746	-1.21289	0.000210774	-1.18164	0.000210774	-1.17383	0.000210777
74.7	-1.10352	0.000210768	-1.21289	0.000210757	-0.912109	0.000210744	-1.19336	0.000210772	-1.18164	0.000210772	-1.17383	0.000210775
74.8	-1.10352	0.000210766	-1.20508	0.000210755	-0.912109	0.000210741	-1.19336	0.00021077	-1.17383	0.000210769	-1.16211	0.000210773
74.9	-1.0918	0.000210763	-1.20508	0.000210753	-0.91211	0.000210739	-1.19336	0.000210767	-1.17383	0.000210767	-1.16211	0.00021077
75	-1.09473	0.000210761	-1.20801	0.000210751	-0.915039	0.000210737	-1.19629	0.000210765	-1.17676	0.000210765	-1.15723	0.000210768
75.1	-1.08594	0.000210759	-1.20703	0.000210749	-0.914063	0.000210735	-1.18359	0.000210763	-1.17578	0.000210763	-1.15625	0.000210766
75.2	-1.08691	0.000210757	-1.19629	0.000210746	-0.915039	0.000210732	-1.18457	0.000210761	-1.17676	0.00021076	-1.14551	0.000210764
75.3	-1.08887	0.000210754	-1.19824	0.000210744	-0.90918	0.00021073	-1.18652	0.000210758	-1.17871	0.000210758	-1.14746	0.000210761
75.4	-1.08691	0.000210752	-1.18848	0.000210742	-0.907227	0.000210728	-1.17676	0.000210756	-1.16504	0.000210756	-1.1377	0.000210759
75.5	-1.08691	0.00021075	-1.18848	0.00021074	-0.907227	0.000210726	-1.16504	0.000210754	-1.16504	0.000210754	-1.1377	0.000210757
75.6	-1.0918	0.000210748	-1.19336	0.000210737	-0.912109	0.000210724	-1.16992	0.000210752	-1.16992	0.000210751	-1.13086	0.000210755
75.7	-1.0918	0.000210745	-1.19336	0.000210735	-0.912109	0.000210721	-1.16211	0.000210749	-1.16211	0.000210749	-1.13086	0.000210753
75.8	-1.0918	0.000210743	-1.19336	0.000210733	-0.912109	0.000210719	-1.16211	0.000210747	-1.15039	0.000210747	-1.12305	0.00021075
75.9	-1.08984	0.000210741	-1.19141	0.000210731	-0.910156	0.000210717	-1.14844	0.000210745	-1.14844	0.000210745	-1.12891	0.000210748
76	-1.0918	0.000210739	-1.18164	0.000210728	-0.900391	0.000210715	-1.15039	0.000210743	-1.15039	0.000210743	-1.13086	0.000210746
76.1	-1.08301	0.000210736	-1.18457	0.000210726	-0.90332	0.000210712	-1.14551	0.00021074	-1.15332	0.00021074	-1.13379	0.000210744
76.2	-1.08301	0.000210734	-1.18457	0.000210724	-0.90332	0.00021071	-1.12598	0.000210738	-1.15332	0.000210738	-1.12598	0.000210741
76.3	-1.08301	0.000210732	-1.18457	0.000210722	-0.895508	0.000210708	-1.10254	0.000210736	-1.15332	0.000210736	-1.12598	0.000210739
76.4	-1.0752	0.00021073	-1.17676	0.00021072	-0.895508	0.000210706	-1.0752	0.000210734	-1.15332	0.000210734	-1.12598	0.000210737
76.5	-1.08301	0.000210728	-1.17676	0.000210717	-0.895508	0.000210703	-1.0752	0.000210732	-1.15332	0.000210731	-1.12598	0.000210735
76.6	-1.08008	0.000210725	-1.16211	0.000210715	-0.892578	0.000210701	-1.07227	0.000210729	-1.15039	0.000210729	-1.12305	0.000210732
76.7	-1.07227	0.000210723	-1.16211	0.000210713	-0.892578	0.000210699	-1.13086	0.000210727	-1.13867	0.000210727	-1.12305	0.00021073
76.8	-1.0752	0.000210721	-1.16504	0.000210711	-0.895508	0.000210697	-1.13379	0.000210725	-1.1416	0.000210725	-1.11426	0.000210728
76.9	-1.0752	0.000210719	-1.16504	0.000210708	-0.895508	0.000210694	-1.06348	0.000210723	-1.1416	0.000210722	-1.11426	0.000210726
77	-1.07813	0.000210716	-1.16797	0.000210706	-0.898438	0.000210692	-1.13672	0.00021072	-1.14453	0.00021072	-1.11719	0.000210723
77.1	-1.0752	0.000210714	-1.16504	0.000210704	-0.895508	0.00021069	-1.06348	0.000210718	-1.1416	0.000210718	-1.12598	0.000210721
77.2	-1.07227	0.000210712	-1.16211	0.000210702	-0.892578	0.000210688	-0.990234	0.000210716	-1.13867	0.000210716	-1.12305	0.000210719
77.3	-1.07227	0.00021071	-1.16211	0.000210699	-0.880859	0.000210686	-1.00977	0.000210714	-1.13086	0.000210713	-1.12305	0.000210717
77.4	-1.07227	0.000210707	-1.16211	0.000210697	-0.892578	0.000210683	-1.20117	0.000210711	-1.13086	0.000210711	-1.12305	0.000210715
77.5	-1.0752	0.000210705	-1.16504	0.000210695	-0.883789	0.000210681	-1.29395	0.000210709	-1.13379	0.000210709	-1.12598	0.000210712
77.6	-1.0752	0.000210703	-1.16504	0.000210693	-0.883789	0.000210679	-1.41504	0.000210707	-1.13379	0.000210707	-1.12598	0.00021071
77.7	-1.07227	0.000210701	-1.1543	0.00021069	-0.880859	0.000210677	-1.7207	0.000210705	-1.11914	0.000210705	-1.13086	0.000210708
77.8	-1.07227	0.000210699	-1.1543	0.000210688	-0.880859	0.000210674	-1.57227	0.000210703	-1.11914	0.000210702	-1.13086	0.000210706
77.9	-1.07617	0.000210696	-1.1582	0.000210686	-0.884766	0.000210672	-0.775391	0.0002107	-1.12305	0.0002107	-1.12695	0.000210703
78	-1.06445	0.000210694	-1.16602	0.000210684	-0.884766	0.00021067	-0.755859	0.000210698	-1.12305	0.000210698	-1.12695	0.000210701
78.1	-1.06152	0.000210692	-1.16309	0.000210682	-0.874024	0.000210668	-1.2334	0.000210696	-1.12012	0.000210696	-1.1123	0.000210699
78.2	-1.06445	0.00021069	-1.16602	0.000210679	-0.876953	0.000210665	-0.814453	0.000210694	-1.12305	0.000210693	-1.11523	0.000210697
78.3	-1.07324	0.000210687	-1.16309	0.000210677	-0.874024	0.000210663	-1.01074	0.000210691	-1.12012	0.000210691	-1.1123	0.000210694
78.4	-1.0752	0.000210685	-1.16504	0.000210675	-0.875977	0.000210661	-1.17285	0.000210689	-1.12207	0.000210689	-1.11426	0.000210692
78.5	-1.0752	0.000210683	-1.15723	0.000210673	-0.875977	0.000210659	-1.13379	0.000210687	-1.12207	0.000210687	-1.11426	0.00021069
78.6	-1.07324	0.000210681	-1.16309	0.00021067	-0.874023	0.000210657	-1.1123	0.000210685	-1.12012	0.000210684	-1.1123	0.000210688
78.7	-1.07324	0.000210678	-1.16309	0.000210668	-0.874024	0.000210654	-1.21387	0.000210682	-1.12012	0.000210682	-1.1123	0.000210686
78.8	-1.06348	0.000210676	-1.15723	0.000210666	-0.875976	0.000210652	-1.3252	0.00021068	-1.12207	0.00021068	-1.11426	0.000210683
78.9	-1.0752	0.000210674	-1.15723	0.000210664	-0.875977	0.00021065	-1.38379	0.000210678	-1.12207	0.000210678	-1.11426	0.000210681
79	-1.0752	0.000210672	-1.15723	0.000210661	-0.875977	0.000210648	-1.37598	0.000210676	-1.12207	0.000210675	-1.11426	0.000210679
79.1	-1.0752	0.000210669	-1.15723	0.000210659	-0.875977	0.000210645	-1.34473	0.000210673	-1.11426	0.000210673	-1.11426	0.000210677
79.2	-1.0752	0.000210667	-1.15723	0.000210657	-0.875976	0.000210643	-1.3252	0.000210671	-1.11426	0.000210671	-1.10645	0.000210674
79.3	-1.07031	0.000210665	-1.15234	0.000210655	-0.871094	0.000210641	-1.30859	0.000210669	-1.10938	0.000210669	-1.10938	0.000210672
79.4	-1.07031	0.000210663	-1.15234	0.000210653	-0.871094	0.000210639	-1.32031	0.000210667	-1.11719	0.000210667	-1.10156	0.00021067
79.5	-1.07227	0.000210661	-1.1543	0.00021065	-0.873047	0.000210636	-1.30273	0.000210665	-1.11914	0.000210664	-1.11133	0.000210668
79.6	-1.07031	0.000210658	-1.15234	0.000210648	-0.878906	0.000210634	-1.30078	0.000210662	-1.11719	0.000210662	-1.10156	0.000210665
79.7	-1.05664	0.000210656	-1.15039	0.000210646	-0.876953	0.000210632	-1.27539	0.00021066	-1.11523	0.00021066	-1.09961	0.000210663
79.8	-1.05664	0.000210654	-1.1582	0.000210644	-0.876953	0.00021063	-1.25586	0.000210658	-1.11523	0.000210658	-1.09961	0.000210661
79.9	-1.07031	0.000210652	-1.16016	0.000210641	-0.878906	0.000210628	-1.23828	0.000210656	-1.11719	0.000210655	-1.10156	0.000210659
80	-1.0625	0.000210649	-1.15234	0.000210639	-0.871094	0.000210625	-1.23047	0.000210653	-1.10938	0.000210653	-1.09375	0.000210656
80.1	-1.05566	0.000210647	-1.15723	0.000210637	-0.868164	0.000210623	-1.24707	0.000210651	-1.11426	0.000210651	-1.08691	0.000210654
80.2	-1.06445	0.000210645	-1.1543	0.000210635	-0.873047	0.000210621	-1.23242	0.000210649	-1.10352	0.000210649	-1.08398	0.000210652
80.3	-1.05273	0.000210643	-1.1543	0.000210632	-0.865234	0.000210619	-1.21289	0.000210647	-1.11133	0.000210646	-1.0957	0.00021065
80.4	-1.0498	0.00021064	-1.15137	0.00021063	-0.862305	0.000210616	-1.22168	0.000210644	-1.1084	0.000210644	-1.09277	0.000210648
80.5	-1.0498	0.000210638	-1.15137	0.000210628	-0.850586	0.000210614	-1.22168	0.000210642	-1.1084	0.000210642	-1.09277	0.000210645
80.6	-1.0625	0.000210636	-1.15234	0.000210626	-0.851562	0.000210612	-1.21094	0.00021064	-1.10937	0.00021064	-1.09375	0.000210643
80.7	-1.05957	0.000210634	-1.14941	0.000210623	-0.848633	0.00021061	-1.18848	0.000210638	-1.10645	0.000210638	-1.09863	0.000210641
80.8	-1.05957	0.000210632	-1.14941	0.000210621	-0.848633	0.000210607	-1.18848	0.000210636	-1.09863	0.000210635	-1.09863	0.000210639
80.9	-1.04785	0.000210629	-1.16113	0.000210619	-0.848633	0.000210605	-1.16895	0.000210633	-1.10645	0.000210633	-1.09863	0.000210636
81	-1.06055	0.000210627	-1.16211	0.000210617	-0.849609	0.000210603	-1.17773	0.000210631	-1.10742	0.000210631	-1.0918	0.000210634
81.1	-1.06055	0.000210625	-1.16211	0.000210615	-0.849609	0.000210601	-1.17773	0.000210629	-1.10742	0.000210629	-1.09961	0.000210632
81.2	-1.06055	0.000210623	-1.16992	0.000210612	-0.849609	0.000210598	-1.17773	0.000210627	-1.10742	0.000210626	-1.09961	0.00021063
81.3	-1.06055	0.00021062	-1.16211	0.00021061	-0.841797	0.000210596	-1.16992	0.000210624	-1.10742	0.000210624	-1.09961	0.000210627
81.4	-1.04883	0.000210618	-1.16211	0.000210608	-0.841797	0.000210594	-1.1582	0.000210622	-1.10742	0.000210622	-1.09961	0.000210625
81.5	-1.04883	0.000210616	-1.16211	0.000210606	-0.841797	0.000210592	-1.16992	0.00021062	-1.10742	0.00021062	-1.09961	0.000210623
81.6	-1.0459	0.000210614	-1.15918	0.000210603	-0.838867	0.00021059	-1.16699	0.000210618	-1.10449	0.000210617	-1.09668	0.000210621
81.7	-1.0459	0.000210611	-1.15918	0.000210601	-0.827148	0.000210587	-1.1748	0.000210615	-1.10449	0.000210615	-1.09668	0.000210619
81.8	-1.03906	0.000210609	-1.15234	0.000210599	-0.832031	0.000210585	-1.17188	0.000210613	-1.12109	0.000210613	-1.10156	0.000210616
81.9	-1.03906	0.000210607	-1.16406	0.000210597	-0.832031	0.000210583	-1.17188	0.000210611	-1.12109	0.000210611	-1.09375	0.000210614
82	-1.05078	0.000210605	-1.16406	0.000210594	-0.832031	0.000210581	-1.19141	0.000210609	-1.12109	0.000210609	-1.09375	0.000210612
82.1	-1.03906	0.000210602	-1.16406	0.000210592	-0.832031	0.000210578	-1.19141	0.000210607	-1.12109	0.000210606	-1.09375	0.00021061
82.2	-1.04004	0.0002106	-1.15332	0.00021059	-0.821289	0.000210576	-1.19238	0.000210604	-1.12207	0.000210604	-1.10254	0.000210607
82.3	-1.03711	0.000210598	-1.16211	0.000210588	-0.818359	0.000210574	-1.16992	0.000210602	-1.11914	0.000210602	-1.09961	0.000210605
82.4	-1.04199	0.000210596	-1.16699	0.000210586	-0.823242	0.000210572	-1.18262	0.0002106	-1.12402	0.0002106	-1.10449	0.000210603
82.5	-1.04199	0.000210594	-1.16699	0.000210583	-0.823242	0.000210569	-1.1748	0.000210598	-1.12402	0.000210597	-1.10449	0.000210601
82.6	-1.04199	0.000210591	-1.15527	0.000210581	-0.834961	0.000210567	-1.18262	0.000210595	-1.12402	0.000210595	-1.10449	0.000210598
82.7	-1.03906	0.000210589	-1.15234	0.000210579	-0.832031	0.000210565	-1.19141	0.000210593	-1.12109	0.000210593	-1.09375	0.000210596
82.8	-1.04199	0.000210587	-1.15527	0.000210577	-0.823242	0.000210563	-1.21387	0.000210591	-1.12402	0.000210591	-1.09668	0.000210594
82.9	-1.04395	0.000210585	-1.15723	0.000210574	-0.825195	0.000210561	-1.20801	0.000210589	-1.12598	0.000210588	-1.08691	0.000210592
83	-1.03613	0.000210582	-1.15723	0.000210572	-0.825195	0.000210558	-1.19629	0.000210586	-1.12598	0.000210586	-1.08691	0.00021059
83.1	-1.03613	0.00021058	-1.15723	0.00021057	-0.825195	0.000210556	-1.20801	0.000210584	-1.12598	0.000210584	-1.08691	0.000210587
83.2	-1.03613	0.000210578	-1.15723	0.000210568	-0.836914	0.000210554	-1.21582	0.000210582	-1.12598	0.000210582	-1.08691	0.000210585
83.3	-1.03613	0.000210576	-1.15723	0.000210565	-0.836914	0.000210552	-1.22754	0.00021058	-1.11426	0.000210579	-1.0752	0.000210583
83.4	-1.03613	0.000210573	-1.15723	0.000210563	-0.825195	0.000210549	-1.21582	0.000210577	-1.11426	0.000210577	-1.0752	0.000210581
83.5	-1.03613	0.000210571	-1.14941	0.000210561	-0.825195	0.000210547	-1.19629	0.000210575	-1.11426	0.000210575	-1.06738	0.000210578
83.6	-1.03613	0.000210569	-1.14941	0.000210559	-0.817383	0.000210545	-1.16504	0.000210573	-1.11426	0.000210573	-1.06738	0.000210576
83.7	-1.0332	0.000210567	-1.13477	0.000210557	-0.814453	0.000210543	-1.1543	0.000210571	-1.11133	0.000210571	-1.06445	0.000210574
83.8	-1.0332	0.000210565	-1.13477	0.000210554	-0.814453	0.00021054	-1.1543	0.000210569	-1.12305	0.000210568	-1.06445	0.000210572
83.9	-1.0332	0.000210562	-1.13477	0.000210552	-0.814453	0.000210538	-1.17383	0.000210566	-1.11133	0.000210566	-1.06445	0.000210569
84	-1.0332	0.00021056	-1.13477	0.00021055	-0.814453	0.000210536	-1.17383	0.000210564	-1.11133	0.000210564	-1.06445	0.000210567
84.1	-1.02148	0.000210558	-1.13477	0.000210548	-0.814453	0.000210534	-1.17383	0.000210562	-1.11133	0.000210562	-1.05273	0.000210565
84.2	-1.0166	0.000210556	-1.1377	0.000210545	-0.817383	0.000210532	-1.18457	0.00021056	-1.11426	0.000210559	-1.05566	0.000210563
84.3	-1.0166	0.000210553	-1.12598	0.000210543	-0.805664	0.000210529	-1.17676	0.000210557	-1.11426	0.000210557	-1.05566	0.00021056
84.4	-1.01367	0.000210551	-1.12305	0.000210541	-0.802735	0.000210527	-1.16211	0.000210555	-1.11133	0.000210555	-1.05273	0.000210558
84.5	-1.02246	0.000210549	-1.13184	0.000210539	-0.803711	0.000210525	-1.16309	0.000210553	-1.12012	0.000210553	-1.06152	0.000210556
84.6	-1.02246	0.000210547	-1.13184	0.000210536	-0.803711	0.000210523	-1.15137	0.000210551	-1.1123	0.00021055	-1.06152	0.000210554
84.7	-1.01074	0.000210544	-1.13184	0.000210534	-0.803711	0.00021052	-1.15137	0.000210548	-1.1123	0.000210548	-1.06152	0.000210552
84.8	-1.01074	0.000210542	-1.13184	0.000210532	-0.803711	0.000210518	-1.12402	0.000210546	-1.1123	0.000210546	-1.05371	0.000210549
84.9	-1.01074	0.00021054	-1.13184	0.00021053	-0.791992	0.000210516	-1.12402	0.000210544	-1.1123	0.000210544	-1.05371	0.000210547
85	-1.01074	0.000210538	-1.12402	0.000210527	-0.791992	0.000210514	-1.09277	0.000210542	-1.12012	0.000210542	-1.05371	0.000210545
85.1	-1.00488	0.000210536	-1.12598	0.000210525	-0.793945	0.000210511	-1.06348	0.00021054	-1.11426	0.000210539	-1.04395	0.000210543
85.2	-1.00684	0.000210533	-1.12793	0.000210523	-0.795898	0.000210509	-1.05762	0.000210537	-1.11621	0.000210537	-1.0459	0.00021054
85.3	-1.00977	0.000210531	-1.13086	0.000210521	-0.798828	0.000210507	-1.03711	0.000210535	-1.11914	0.000210535	-1.04883	0.000210538
85.4	-1.01563	0.000210529	-1.13672	0.000210519	-0.804688	0.000210505	-1.02344	0.000210533	-1.125	0.000210533	-1.05469	0.000210536
85.5	-1.0127	0.000210527	-1.12207	0.000210516	-0.793945	0.000210503	-1.03223	0.000210531	-1.12207	0.00021053	-1.05176	0.000210534
85.6	-1.00586	0.000210524	-1.12695	0.000210514	-0.798828	0.0002105	-1.03711	0.000210528	-1.12695	0.000210528	-1.05664	0.000210531
85.7	-1.00586	0.000210522	-1.12695	0.000210512	-0.787109	0.000210498	-1.07617	0.000210526	-1.12695	0.000210526	-1.05664	0.000210529
85.8	-1.00586	0.00021052	-1.11914	0.00021051	-0.787109	0.000210496	-1.10742	0.000210524	-1.12695	0.000210524	-1.05664	0.000210527
85.9	-1.00879	0.000210518	-1.12207	0.000210507	-0.790039	0.000210494	-1.11816	0.000210522	-1.12988	0.000210521	-1.05957	0.000210525
86	-1.00098	0.000210515	-1.12207	0.000210505	-0.790039	0.000210491	-1.12988	0.000210519	-1.11816	0.000210519	-1.05176	0.000210523
86.1	-1.00098	0.000210513	-1.12207	0.000210503	-0.790039	0.000210489	-1.14941	0.000210517	-1.11816	0.000210517	-1.04004	0.00021052
86.2	-0.998047	0.000210511	-1.11914	0.000210501	-0.787109	0.000210487	-1.13867	0.000210515	-1.11523	0.000210515	-1.03711	0.000210518
86.3	-0.995117	0.000210509	-1.11621	0.000210498	-0.78418	0.000210485	-1.12402	0.000210513	-1.12402	0.000210513	-1.03418	0.000210516
86.4	-0.995117	0.000210507	-1.10449	0.000210496	-0.78418	0.000210482	-1.12402	0.000210511	-1.1123	0.00021051	-1.03418	0.000210514
86.5	-0.998047	0.000210504	-1.10742	0.000210494	-0.787109	0.00021048	-1.11523	0.000210508	-1.11523	0.000210508	-1.03711	0.000210511
86.6	-1.00098	0.000210502	-1.11035	0.000210492	-0.790039	0.000210478	-1.09082	0.000210506	-1.11816	0.000210506	-1.04004	0.000210509
86.7	-0.989258	0.0002105	-1.11035	0.00021049	-0.790039	0.000210476	-1.11035	0.000210504	-1.11816	0.000210504	-1.04004	0.000210507
86.8	-0.986328	0.000210498	-1.10742	0.000210487	-0.787109	0.000210474	-1.0957	0.000210502	-1.11523	0.000210501	-1.03711	0.000210505
86.9	-0.986328	0.000210495	-1.10742	0.000210485	-0.787109	0.000210471	-1.11523	0.000210499	-1.11523	0.000210499	-1.03711	0.000210502
87	-0.986328	0.000210493	-1.10742	0.000210483	-0.798828	0.000210469	-1.12695	0.000210497	-1.11523	0.000210497	-1.0293	0.0002105
87.1	-0.986328	0.000210491	-1.09961	0.000210481	-0.798828	0.000210467	-1.10742	0.000210495	-1.11523	0.000210495	-1.0293	0.000210498
87.2	-0.989258	0.000210489	-1.10254	0.000210478	-0.801758	0.000210465	-1.11816	0.000210493	-1.11816	0.000210492	-1.03223	0.000210496
87.3	-0.988281	0.000210486	-1.10156	0.000210476	-0.800781	0.000210462	-1.14063	0.00021049	-1.11719	0.00021049	-1.03125	0.000210494
87.4	-0.986328	0.000210484	-1.09961	0.000210474	-0.798828	0.00021046	-1.14648	0.000210488	-1.11523	0.000210488	-1.01758	0.000210491
87.5	-0.984375	0.000210482	-1.10547	0.000210472	-0.804688	0.000210458	-1.15625	0.000210486	-1.125	0.000210486	-1.01563	0.000210489
87.6	-0.972656	0.00021048	-1.10547	0.000210469	-0.804687	0.000210456	-1.15625	0.000210484	-1.125	0.000210484	-1.01562	0.000210487
87.7	-0.981446	0.000210478	-1.10254	0.000210467	-0.801758	0.000210453	-1.1416	0.000210482	-1.12207	0.000210481	-1.0127	0.000210485
87.8	-0.981445	0.000210475	-1.10254	0.000210465	-0.801758	0.000210451	-1.1416	0.000210479	-1.12207	0.000210479	-1.0127	0.000210482
87.9	-0.966797	0.000210473	-1.0918	0.000210463	-0.798828	0.000210449	-1.13086	0.000210477	-1.11914	0.000210477	-1.00977	0.00021048
88	-0.961914	0.000210471	-1.08691	0.000210461	-0.786133	0.000210447	-1.12598	0.000210475	-1.11426	0.000210475	-1.00488	0.000210478
88.1	-0.963867	0.000210469	-1.08887	0.000210458	-0.795899	0.000210445	-1.05762	0.000210473	-1.11621	0.000210472	-0.995117	0.000210476
88.2	-0.966797	0.000210466	-1.0918	0.000210456	-0.798828	0.000210442	-1.04883	0.00021047	-1.11914	0.00021047	-0.998047	0.000210473
88.3	-0.966797	0.000210464	-1.09961	0.000210454	-0.798828	0.00021044	-1.0293	0.000210468	-1.11914	0.000210468	-0.998047	0.000210471
88.4	-0.958984	0.000210462	-1.09961	0.000210452	-0.798828	0.000210438	-1.01758	0.000210466	-1.11914	0.000210466	-0.998047	0.000210469
88.5	-0.957031	0.00021046	-1.09766	0.000210449	-0.796875	0.000210436	-1.04688	0.000210464	-1.11719	0.000210463	-0.996094	0.000210467
88.6	-0.957031	0.000210457	-1.09766	0.000210447	-0.796875	0.000210433	-1.04688	0.000210461	-1.11719	0.000210461	-0.996094	0.000210465
88.7	-0.957031	0.000210455	-1.09766	0.000210445	-0.796875	0.000210431	-1.04687	0.000210459	-1.11719	0.000210459	-1.00781	0.000210462
88.8	-0.954102	0.000210453	-1.10645	0.000210443	-0.793946	0.000210429	-1.0127	0.000210457	-1.11426	0.000210457	-1.00488	0.00021046
88.9	-0.94043	0.000210451	-1.10449	0.00021044	-0.791992	0.000210427	-0.97168	0.000210455	-1.12012	0.000210455	-1.00293	0.000210458
89	-0.94043	0.000210449	-1.10449	0.000210438	-0.791992	0.000210424	-0.913086	0.000210453	-1.12012	0.000210452	-1.00293	0.000210456
89.1	-0.943359	0.000210446	-1.10742	0.000210436	-0.794922	0.000210422	-0.923828	0.00021045	-1.12305	0.00021045	-1.00586	0.000210453
89.2	-0.94043	0.000210444	-1.10449	0.000210434	-0.791992	0.00021042	-0.874023	0.000210448	-1.12012	0.000210448	-1.00293	0.000210451
89.3	-0.94043	0.000210442	-1.10449	0.000210432	-0.791992	0.000210418	-0.862305	0.000210446	-1.13184	0.000210446	-1.00293	0.000210449
89.4	-0.932617	0.00021044	-1.10449	0.000210429	-0.803711	0.000210416	-0.842773	0.000210444	-1.13184	0.000210443	-1.01465	0.000210447
89.5	-0.932617	0.000210437	-1.10449	0.000210427	-0.803711	0.000210413	-0.842773	0.000210441	-1.13184	0.000210441	-1.01465	0.000210444
89.6	-0.932617	0.000210435	-1.1123	0.000210425	-0.803711	0.000210411	-0.842773	0.000210439	-1.13184	0.000210439	-1.01465	0.000210442
89.7	-0.932617	0.000210433	-1.12402	0.000210423	-0.803711	0.000210409	-0.823242	0.000210437	-1.13965	0.000210437	-1.01465	0.00021044
89.8	-0.926758	0.000210431	-1.10645	0.00021042	-0.797852	0.000210407	-0.825195	0.000210435	-1.13379	0.000210434	-1.00879	0.000210438
89.9	-0.929688	0.000210428	-1.12109	0.000210418	-0.800781	0.000210404	-0.777344	0.000210432	-1.13672	0.000210432	-1.01953	0.000210436
90	-0.917969	0.000210426	-1.12109	0.000210416	-0.800781	0.000210402	-0.769531	0.00021043	-1.14844	0.00021043	-1.01172	0.000210433
90.1	-0.917969	0.000210424	-1.12109	0.000210414	-0.800781	0.0002104	-0.777344	0.000210428	-1.14844	0.000210428	-1.01172	0.000210431
90.2	-0.926758	0.000210422	-1.11816	0.000210411	-0.797852	0.000210398	-0.766602	0.000210426	-1.14551	0.000210426	-1.00879	0.000210429
90.3	-0.915039	0.00021042	-1.11816	0.000210409	-0.797852	0.000210395	-0.774414	0.000210424	-1.14551	0.000210423	-1.00879	0.000210427
90.4	-0.915039	0.000210417	-1.11816	0.000210407	-0.805664	0.000210393	-0.774414	0.000210421	-1.14551	0.000210421	-1.0166	0.000210424
90.5	-0.913086	0.000210415	-1.11621	0.000210405	-0.803711	0.000210391	-0.81543	0.000210419	-1.14355	0.000210419	-1.01465	0.000210422
90.6	-0.913086	0.000210413	-1.12402	0.000210403	-0.803711	0.000210389	-0.764648	0.000210417	-1.15527	0.000210417	-1.01465	0.00021042
90.7	-0.908203	0.000210411	-1.11914	0.0002104	-0.798828	0.000210387	-0.759766	0.000210415	-1.15039	0.000210414	-1.00195	0.000210418
90.8	-0.908203	0.000210408	-1.11914	0.000210398	-0.798828	0.000210384	-0.791016	0.000210412	-1.15039	0.000210412	-1.00977	0.000210415
90.9	-0.916992	0.000210406	-1.11621	0.000210396	-0.795898	0.000210382	-0.788086	0.00021041	-1.14746	0.00021041	-0.999023	0.000210413
91	-0.916992	0.000210404	-1.11621	0.000210394	-0.788086	0.00021038	-0.795898	0.000210408	-1.14746	0.000210408	-0.999023	0.000210411
91.1	-0.915039	0.000210402	-1.11426	0.000210391	-0.786133	0.000210378	-0.805664	0.000210406	-1.14551	0.000210405	-0.99707	0.000210409
91.2	-0.915039	0.000210399	-1.11426	0.000210389	-0.793945	0.000210375	-0.813476	0.000210403	-1.14551	0.000210403	-1.00488	0.000210407
91.3	-0.903321	0.000210397	-1.12598	0.000210387	-0.793946	0.000210373	-0.844727	0.000210401	-1.14551	0.000210401	-1.00488	0.000210404
91.4	-0.901367	0.000210395	-1.1123	0.000210385	-0.791992	0.000210371	-0.831055	0.000210399	-1.14355	0.000210399	-1.00293	0.000210402
91.5	-0.901367	0.000210393	-1.12402	0.000210382	-0.791992	0.000210369	-0.862305	0.000210397	-1.15137	0.000210397	-1.01465	0.0002104
91.6	-0.898437	0.000210391	-1.12109	0.00021038	-0.789062	0.000210366	-0.890625	0.000210395	-1.14844	0.000210394	-1.01172	0.000210398
91.7	-0.899414	0.000210388	-1.12207	0.000210378	-0.790039	0.000210364	-0.942383	0.000210392	-1.14941	0.000210392	-1.02051	0.000210395
91.8	-0.910156	0.000210386	-1.12109	0.000210376	-0.789062	0.000210362	-0.898437	0.00021039	-1.14062	0.00021039	-1.01953	0.000210393
91.9	-0.910156	0.000210384	-1.12109	0.000210374	-0.789062	0.00021036	-0.917969	0.000210388	-1.14062	0.000210388	-1.01953	0.000210391
92	-0.911133	0.000210382	-1.12207	0.000210371	-0.790039	0.000210358	-0.961914	0.000210386	-1.14941	0.000210385	-1.02051	0.000210389
92.1	-0.893555	0.000210379	-1.11621	0.000210369	-0.78418	0.000210355	-0.975586	0.000210383	-1.14355	0.000210383	-1.01465	0.000210386
92.2	-0.896484	0.000210377	-1.13086	0.000210367	-0.787109	0.000210353	-1.00586	0.000210381	-1.14648	0.000210381	-1.01758	0.000210384
92.3	-0.896484	0.000210375	-1.13086	0.000210365	-0.779297	0.000210351	-1.00586	0.000210379	-1.14648	0.000210379	-1.01758	0.000210382
92.4	-0.910156	0.000210373	-1.13281	0.000210362	-0.78125	0.000210349	-1.03906	0.000210377	-1.14844	0.000210376	-1.01953	0.00021038
92.5	-0.910156	0.00021037	-1.13281	0.00021036	-0.789063	0.000210346	-1.12109	0.000210374	-1.14844	0.000210374	-1.01953	0.000210378
92.6	-0.892578	0.000210368	-1.12695	0.000210358	-0.783203	0.000210344	-1.17383	0.000210372	-1.14258	0.000210372	-1.01367	0.000210375
92.7	-0.894531	0.000210366	-1.12891	0.000210356	-0.785156	0.000210342	-1.15625	0.00021037	-1.14453	0.00021037	-1.01563	0.000210373
92.8	-0.909179	0.000210364	-1.13184	0.000210354	-0.788086	0.00021034	-1.1084	0.000210368	-1.14746	0.000210368	-1.01855	0.000210371
92.9	-0.892578	0.000210362	-1.12695	0.000210351	-0.783203	0.000210337	-1.10352	0.000210366	-1.14258	0.000210365	-1.01367	0.000210369
93	-0.892578	0.000210359	-1.12695	0.000210349	-0.783203	0.000210335	-1.10352	0.000210363	-1.14258	0.000210363	-1.01367	0.000210366
93.1	-0.904297	0.000210357	-1.11523	0.000210347	-0.783203	0.000210333	-1.12305	0.000210361	-1.14258	0.000210361	-1.01367	0.000210364
93.2	-0.895508	0.000210355	-1.12988	0.000210345	-0.77832	0.000210331	-1.08691	0.000210359	-1.14551	0.000210359	-1.0166	0.000210362
93.3	-0.890625	0.000210353	-1.11328	0.000210342	-0.773438	0.000210329	-1.03125	0.000210357	-1.14063	0.000210356	-1.02344	0.00021036
93.4	-0.890625	0.00021035	-1.125	0.00021034	-0.761719	0.000210326	-1	0.000210354	-1.14063	0.000210354	-1.01172	0.000210357
93.5	-0.890625	0.000210348	-1.11328	0.000210338	-0.761719	0.000210324	-1.05078	0.000210352	-1.14063	0.000210352	-1.01172	0.000210355
93.6	-0.890625	0.000210346	-1.11328	0.000210336	-0.761719	0.000210322	-1.03125	0.00021035	-1.14063	0.00021035	-1.02344	0.000210353
93.7	-0.890625	0.000210344	-1.11328	0.000210333	-0.761719	0.00021032	-1.02344	0.000210348	-1.13281	0.000210347	-1.02344	0.000210351
93.8	-0.895507	0.000210341	-1.11816	0.000210331	-0.766601	0.000210317	-1.03613	0.000210345	-1.14551	0.000210345	-1.02832	0.000210349
93.9	-0.900391	0.000210339	-1.12305	0.000210329	-0.771484	0.000210315	-1.00977	0.000210343	-1.15039	0.000210343	-1.0332	0.000210346
94	-0.900391	0.000210337	-1.12305	0.000210327	-0.771484	0.000210313	-1.04102	0.000210341	-1.14258	0.000210341	-1.0332	0.000210344
94.1	-0.90625	0.000210335	-1.12891	0.000210325	-0.777344	0.000210311	-1.01562	0.000210339	-1.14844	0.000210339	-1.03906	0.000210342
94.2	-0.897461	0.000210333	-1.12012	0.000210322	-0.768555	0.000210308	-1.00684	0.000210337	-1.13965	0.000210336	-1.03027	0.00021034
94.3	-0.90039	0.00021033	-1.12305	0.00021032	-0.771484	0.000210306	-1.02148	0.000210334	-1.14258	0.000210334	-1.0332	0.000210337
94.4	-0.902344	0.000210328	-1.125	0.000210318	-0.773438	0.000210304	-0.992188	0.000210332	-1.14453	0.000210332	-1.02344	0.000210335
94.5	-0.902344	0.000210326	-1.125	0.000210316	-0.773438	0.000210302	-1.00391	0.00021033	-1.14453	0.00021033	-1.02344	0.000210333
94.6	-0.907227	0.000210324	-1.12988	0.000210313	-0.770508	0.0002103	-1.0166	0.000210328	-1.1377	0.000210327	-1.02832	0.000210331
94.7	-0.910156	0.000210321	-1.13281	0.000210311	-0.773438	0.000210297	-1.03125	0.000210325	-1.14063	0.000210325	-1.02344	0.000210328
94.8	-0.910156	0.000210319	-1.13281	0.000210309	-0.773438	0.000210295	-1.01953	0.000210323	-1.14063	0.000210323	-1.02344	0.000210326
94.9	-0.908203	0.000210317	-1.13086	0.000210307	-0.771484	0.000210293	-1.04883	0.000210321	-1.13867	0.000210321	-1.02148	0.000210324
95	-0.910156	0.000210315	-1.13281	0.000210304	-0.773438	0.000210291	-1.04297	0.000210319	-1.14063	0.000210318	-1.01172	0.000210322
95.1	-0.913086	0.000210312	-1.13574	0.000210302	-0.764648	0.000210288	-1.0459	0.000210316	-1.14355	0.000210316	-1.01465	0.00021032
95.2	-0.911133	0.00021031	-1.13379	0.0002103	-0.762695	0.000210286	-1.04395	0.000210314	-1.1416	0.000210314	-1.0127	0.000210317
95.3	-0.915039	0.000210308	-1.12598	0.000210298	-0.766601	0.000210284	-1.05566	0.000210312	-1.14551	0.000210312	-1.0166	0.000210315
95.4	-0.919922	0.000210306	-1.12305	0.000210296	-0.771484	0.000210282	-1.05273	0.00021031	-1.15039	0.00021031	-1.02148	0.000210313
95.5	-0.919922	0.000210304	-1.12305	0.000210293	-0.771484	0.000210279	-1.05273	0.000210308	-1.15039	0.000210307	-1.02148	0.000210311
95.6	-0.919922	0.000210301	-1.12305	0.000210291	-0.771485	0.000210277	-1.04102	0.000210305	-1.15039	0.000210305	-1.02148	0.000210308
95.7	-0.922852	0.000210299	-1.12598	0.000210289	-0.774414	0.000210275	-1.04395	0.000210303	-1.15332	0.000210303	-1.02441	0.000210306
95.8	-0.922851	0.000210297	-1.12598	0.000210287	-0.774414	0.000210273	-1.05566	0.000210301	-1.1416	0.000210301	-1.0166	0.000210304
95.9	-0.922852	0.000210295	-1.12598	0.000210284	-0.774414	0.000210271	-1.04395	0.000210299	-1.1416	0.000210298	-1.0166	0.000210302
96	-0.927734	0.000210292	-1.13086	0.000210282	-0.779297	0.000210268	-1.03711	0.000210296	-1.14648	0.000210296	-1.02148	0.0002103
96.1	-0.936523	0.00021029	-1.11621	0.00021028	-0.768555	0.000210266	-1.03418	0.000210294	-1.14355	0.000210294	-1.01855	0.000210297
96.2	-0.93457	0.000210288	-1.11426	0.000210278	-0.774414	0.000210264	-1.04395	0.000210292	-1.1416	0.000210292	-1.0166	0.000210295
96.3	-0.933594	0.000210286	-1.11328	0.000210275	-0.773438	0.000210262	-1.04297	0.00021029	-1.14063	0.00021029	-1.01563	0.000210293
96.4	-0.936524	0.000210283	-1.11621	0.000210273	-0.776368	0.000210259	-1.06543	0.000210288	-1.14356	0.000210287	-1.01856	0.000210291
96.5	-0.944336	0.000210281	-1.12402	0.000210271	-0.784179	0.000210257	-1.08496	0.000210285	-1.14355	0.000210285	-1.02637	0.000210288
96.6	-0.944336	0.000210279	-1.12402	0.000210269	-0.784179	0.000210255	-1.07324	0.000210283	-1.15137	0.000210283	-1.02637	0.000210286
96.7	-0.941406	0.000210277	-1.12109	0.000210267	-0.781249	0.000210253	-1.07031	0.000210281	-1.14844	0.000210281	-1.02344	0.000210284
96.8	-0.934571	0.000210275	-1.10645	0.000210264	-0.774415	0.000210251	-1.03223	0.000210279	-1.1416	0.000210278	-1.0166	0.000210282
96.9	-0.932617	0.000210272	-1.10449	0.000210262	-0.772461	0.000210248	-1.06152	0.000210276	-1.13965	0.000210276	-1.02246	0.000210279
97	-0.916016	0.00021027	-1.09961	0.00021026	-0.767578	0.000210246	-1.01758	0.000210274	-1.13477	0.000210274	-1.00977	0.000210277
97.1	-0.925781	0.000210268	-1.09766	0.000210258	-0.765625	0.000210244	-1.03516	0.000210272	-1.13281	0.000210272	-1.00781	0.000210275
97.2	-0.924805	0.000210266	-1.09668	0.000210255	-0.764648	0.000210242	-1.02246	0.00021027	-1.13184	0.000210269	-1.00684	0.000210273
97.3	-0.922852	0.000210263	-1.09473	0.000210253	-0.762695	0.000210239	-1.0127	0.000210267	-1.1416	0.000210267	-1.00488	0.000210271
97.4	-0.922852	0.000210261	-1.09473	0.000210251	-0.762695	0.000210237	-1.0127	0.000210265	-1.1416	0.000210265	-0.993164	0.000210268
97.5	-0.922852	0.000210259	-1.09473	0.000210249	-0.774414	0.000210235	-1.0127	0.000210263	-1.1416	0.000210263	-0.993164	0.000210266
97.6	-0.919921	0.000210257	-1.0918	0.000210247	-0.771484	0.000210233	-0.998046	0.000210261	-1.13867	0.000210261	-0.990234	0.000210264
97.7	-0.912109	0.000210255	-1.08398	0.000210244	-0.763672	0.00021023	-1.00977	0.000210259	-1.13086	0.000210258	-0.982422	0.000210262
97.8	-0.912109	0.000210252	-1.08398	0.000210242	-0.763672	0.000210228	-1.02148	0.000210256	-1.13086	0.000210256	-0.982422	0.000210259
97.9	-0.918944	0.00021025	-1.07129	0.00021024	-0.770507	0.000210226	-1.03223	0.000210254	-1.1416	0.000210254	-0.981444	0.000210257
98	-0.904298	0.000210248	-1.05664	0.000210238	-0.755861	0.000210224	-1.00586	0.000210252	-1.12695	0.000210252	-0.966798	0.000210255
98.1	-0.909181	0.000210246	-1.05371	0.000210235	-0.760743	0.000210222	-0.991212	0.00021025	-1.12012	0.000210249	-0.971681	0.000210253
98.2	-0.93457	0.000210243	-1.06738	0.000210233	-0.774414	0.000210219	-1.00488	0.000210247	-1.13379	0.000210247	-0.985351	0.00021025
98.3	-0.928711	0.000210241	-1.0498	0.000210231	-0.768555	0.000210217	-0.999024	0.000210245	-1.13965	0.000210245	-0.979492	0.000210248
98.4	-0.925781	0.000210239	-1.04688	0.000210229	-0.765625	0.000210215	-0.984375	0.000210243	-1.13672	0.000210243	-0.976563	0.000210246
98.5	-0.914063	0.000210237	-1.05859	0.000210226	-0.765625	0.000210213	-0.984375	0.000210241	-1.125	0.00021024	-0.976563	0.000210244
98.6	-0.916992	0.000210234	-1.0498	0.000210224	-0.768554	0.00021021	-0.987304	0.000210238	-1.13965	0.000210238	-0.979492	0.000210242
98.7	-0.923828	0.000210232	-1.05664	0.000210222	-0.763672	0.000210208	-0.974609	0.000210236	-1.13477	0.000210236	-0.962891	0.000210239
98.8	-0.917969	0.00021023	-1.05078	0.00021022	-0.757813	0.000210206	-0.957031	0.000210234	-1.12891	0.000210234	-0.957031	0.000210237
98.9	-0.925782	0.000210228	-1.06641	0.000210218	-0.765626	0.000210204	-0.976563	0.000210232	-1.125	0.000210232	-0.964844	0.000210235
99	-0.938476	0.000210226	-1.07129	0.000210215	-0.790038	0.000210201	-0.989257	0.00021023	-1.13769	0.000210229	-0.977538	0.000210233
99.1	-0.946288	0.000210223	-1.0791	0.000210213	-0.797851	0.000210199	-0.99707	0.000210227	-1.14551	0.000210227	-0.977538	0.00021023
99.2	-0.938477	0.000210221	-1.07129	0.000210211	-0.79004	0.000210197	-0.989258	0.000210225	-1.1377	0.000210225	-0.969727	0.000210228
99.3	-0.951171	0.000210219	-1.08398	0.000210209	-0.802734	0.000210195	-0.99414	0.000210223	-1.14258	0.000210223	-0.974609	0.000210226
99.4	-0.952149	0.000210217	-1.08496	0.000210206	-0.803711	0.000210193	-0.995118	0.000210221	-1.14356	0.00021022	-0.975586	0.000210224
99.5	-0.957031	0.000210214	-1.08984	0.000210204	-0.808593	0.00021019	-0.988281	0.000210218	-1.14844	0.000210218	-0.980468	0.000210222
99.6	-0.952148	0.000210212	-1.09668	0.000210202	-0.815429	0.000210188	-0.995117	0.000210216	-1.14355	0.000210216	-0.975586	0.000210219
99.7	-0.946289	0.00021021	-1.09082	0.0002102	-0.80957	0.000210186	-0.989258	0.000210214	-1.1377	0.000210214	-0.969727	0.000210217
99.8	-0.944336	0.000210208	-1.07715	0.000210197	-0.807617	0.000210184	-0.987305	0.000210212	-1.14746	0.000210212	-0.967773	0.000210215
99.9	-0.958985	0.000210205	-1.08008	0.000210195	-0.81836	0.000210181	-1.00977	0.00021021	-1.15039	0.000210209	-0.970703	0.000210213
100	-0.959961	0.000210203	-1.08105	0.000210193	-0.819336	0.000210179	-1.01074	0.000210207	-1.15137	0.000210207	-0.971679	0.00021021
100.1	-0.957031	0.000210201	-1.07812	0.000210191	-0.816406	0.000210177	-1.01562	0.000210205	-1.14844	0.000210205	-0.96875	0.000210208
100.2	-0.951172	0.000210199	-1.07227	0.000210189	-0.810547	0.000210175	-1.00195	0.000210203	-1.14258	0.000210203	-0.962891	0.000210206
100.3	-0.948242	0.000210197	-1.06934	0.000210186	-0.807617	0.000210173	-0.979492	0.000210201	-1.13965	0.0002102	-0.959961	0.000210204
100.4	-0.946289	0.000210194	-1.06738	0.000210184	-0.817383	0.00021017	-0.977539	0.000210198	-1.14551	0.000210198	-0.958008	0.000210201
100.5	-0.945312	0.000210192	-1.06641	0.000210182	-0.816406	0.000210168	-0.996094	0.000210196	-1.14453	0.000210196	-0.957031	0.000210199
100.6	-0.945312	0.00021019	-1.06641	0.00021018	-0.816406	0.000210166	-0.996094	0.000210194	-1.14453	0.000210194	-0.957031	0.000210197
100.7	-0.94043	0.000210188	-1.06152	0.000210177	-0.811523	0.000210164	-0.999023	0.000210192	-1.13184	0.000210191	-0.959961	0.000210195
100.8	-0.943359	0.000210185	-1.05664	0.000210175	-0.814453	0.000210161	-0.994141	0.000210189	-1.13477	0.000210189	-0.962891	0.000210193
100.9	-0.94043	0.000210183	-1.06152	0.000210173	-0.811523	0.000210159	-1.02246	0.000210187	-1.13184	0.000210187	-0.959961	0.00021019
101	-0.935547	0.000210181	-1.04883	0.000210171	-0.818359	0.000210157	-0.966797	0.000210185	-1.13477	0.000210185	-0.966797	0.000210188
101.1	-0.938476	0.000210179	-1.05176	0.000210169	-0.821289	0.000210155	-0.958008	0.000210183	-1.1377	0.000210183	-0.958008	0.000210186
101.2	-0.932617	0.000210177	-1.03418	0.000210166	-0.81543	0.000210152	-0.97168	0.000210181	-1.12402	0.00021018	-0.952148	0.000210184
101.3	-0.930664	0.000210174	-1.03223	0.000210164	-0.801758	0.00021015	-0.981445	0.000210178	-1.12207	0.000210178	-0.942383	0.000210181
101.4	-0.925781	0.000210172	-1.03906	0.000210162	-0.808594	0.000210148	-1.02734	0.000210176	-1.125	0.000210176	-0.9375	0.000210179
101.5	-0.923828	0.00021017	-1.03711	0.00021016	-0.806641	0.000210146	-1.04492	0.000210174	-1.11523	0.000210174	-0.935547	0.000210177
101.6	-0.925781	0.000210168	-1.03906	0.000210157	-0.808594	0.000210144	-0.996094	0.000210172	-1.11719	0.000210171	-0.945313	0.000210175
101.7	-0.925781	0.000210165	-1.03906	0.000210155	-0.808594	0.000210141	-1.05469	0.000210169	-1.11719	0.000210169	-0.945313	0.000210172
101.8	-0.920898	0.000210163	-1.03418	0.000210153	-0.811523	0.000210139	-1.16309	0.000210167	-1.1123	0.000210167	-0.94043	0.00021017
101.9	-0.923828	0.000210161	-1.03711	0.000210151	-0.814453	0.000210137	-1.10352	0.000210165	-1.10352	0.000210165	-0.955078	0.000210168
102	-0.918945	0.000210159	-1.03223	0.000210148	-0.80957	0.000210135	-0.969727	0.000210163	-1.11035	0.000210162	-0.950195	0.000210166
102.1	-0.920898	0.000210156	-1.03418	0.000210146	-0.803711	0.000210132	-0.889648	0.00021016	-1.1123	0.00021016	-0.952148	0.000210164
102.2	-0.918945	0.000210154	-1.03223	0.000210144	-0.801758	0.00021013	-0.950195	0.000210158	-1.11035	0.000210158	-0.950195	0.000210161
102.3	-0.916016	0.000210152	-1.0293	0.000210142	-0.798828	0.000210128	-1.01758	0.000210156	-1.0957	0.000210156	-0.947266	0.000210159
102.4	-0.929687	0.00021015	-1.03906	0.00021014	-0.800781	0.000210126	-0.847656	0.000210154	-1.09766	0.000210154	-0.949219	0.000210157
102.5	-0.914063	0.000210148	-1.03516	0.000210137	-0.796875	0.000210124	-0.773438	0.000210152	-1.09375	0.000210151	-0.945313	0.000210155
102.6	-0.90918	0.000210145	-1.02246	0.000210135	-0.791992	0.000210121	-0.850586	0.000210149	-1.08887	0.000210149	-0.94043	0.000210152
102.7	-0.912109	0.000210143	-1.02539	0.000210133	-0.794922	0.000210119	-0.962891	0.000210147	-1.0918	0.000210147	-0.943359	0.00021015
102.8	-0.912109	0.000210141	-1.02539	0.000210131	-0.794922	0.000210117	-0.931641	0.000210145	-1.0918	0.000210145	-0.943359	0.000210148
102.9	-0.907227	0.000210139	-1.02832	0.000210128	-0.790039	0.000210115	-0.899414	0.000210143	-1.08691	0.000210142	-0.938477	0.000210146
103	-0.904297	0.000210136	-1.01758	0.000210126	-0.787109	0.000210112	-0.884766	0.00021014	-1.08398	0.00021014	-0.935547	0.000210144
103.1	-0.916016	0.000210134	-1.01758	0.000210124	-0.787109	0.00021011	-0.904297	0.000210138	-1.08398	0.000210138	-0.935547	0.000210141
103.2	-0.904297	0.000210132	-1.00586	0.000210122	-0.787109	0.000210108	-0.955078	0.000210136	-1.08398	0.000210136	-0.935547	0.000210139
103.3	-0.90332	0.00021013	-1.00488	0.00021012	-0.786133	0.000210106	-0.93457	0.000210134	-1.08301	0.000210134	-0.93457	0.000210137
103.4	-0.90625	0.000210128	-1.00781	0.000210117	-0.796875	0.000210103	-0.9375	0.000210132	-1.08594	0.000210131	-0.9375	0.000210135
103.5	-0.903321	0.000210125	-1.00488	0.000210115	-0.786133	0.000210101	-0.934571	0.000210129	-1.08301	0.000210129	-0.934571	0.000210132
103.6	-0.90625	0.000210123	-1.02734	0.000210113	-0.789063	0.000210099	-0.90625	0.000210127	-1.08594	0.000210127	-0.9375	0.00021013
103.7	-0.90332	0.000210121	-1.02441	0.000210111	-0.793945	0.000210097	-0.922851	0.000210125	-1.08301	0.000210125	-0.93457	0.000210128
103.8	-0.900391	0.000210119	-1.0332	0.000210108	-0.791016	0.000210095	-0.990235	0.000210123	-1.08008	0.000210122	-0.931641	0.000210126
103.9	-0.900391	0.000210116	-1.0332	0.000210106	-0.791016	0.000210092	-0.982422	0.00021012	-1.06836	0.00021012	-0.931641	0.000210123
104	-0.900391	0.000210114	-1.0332	0.000210104	-0.791016	0.00021009	-0.970703	0.000210118	-1.06836	0.000210118	-0.931641	0.000210121
104.1	-0.898438	0.000210112	-1.01953	0.000210102	-0.789063	0.000210088	-0.96875	0.000210116	-1.06641	0.000210116	-0.929688	0.000210119
104.2	-0.898438	0.00021011	-1.03125	0.000210099	-0.789063	0.000210086	-0.917969	0.000210114	-1.06641	0.000210113	-0.929688	0.000210117
104.3	-0.898438	0.000210107	-1.01953	0.000210097	-0.789063	0.000210083	-0.917969	0.000210111	-1.07813	0.000210111	-0.929688	0.000210115
104.4	-0.896484	0.000210105	-1.00977	0.000210095	-0.787109	0.000210081	-0.935547	0.000210109	-1.07617	0.000210109	-0.927734	0.000210112
104.5	-0.890625	0.000210103	-1.00391	0.000210093	-0.78125	0.000210079	-0.949219	0.000210107	-1.07031	0.000210107	-0.921875	0.00021011
104.6	-0.893555	0.000210101	-1.01465	0.000210091	-0.78418	0.000210077	-0.932617	0.000210105	-1.07324	0.000210105	-0.924805	0.000210108
104.7	-0.881836	0.000210099	-1.01465	0.000210088	-0.78418	0.000210075	-0.944336	0.000210103	-1.07324	0.000210102	-0.913086	0.000210106
104.8	-0.881836	0.000210096	-1.01465	0.000210086	-0.776367	0.000210072	-0.944336	0.0002101	-1.07324	0.0002101	-0.924805	0.000210103
104.9	-0.881836	0.000210094	-1.01465	0.000210084	-0.776367	0.00021007	-0.932617	0.000210098	-1.07324	0.000210098	-0.913086	0.000210101
105	-0.879883	0.000210092	-1.0127	0.000210082	-0.762696	0.000210068	-0.950196	0.000210096	-1.08301	0.000210096	-0.911133	0.000210099
105.1	-0.87207	0.00021009	-1.00488	0.000210079	-0.754883	0.000210066	-0.915039	0.000210094	-1.0752	0.000210093	-0.915039	0.000210097
105.2	-0.870117	0.000210087	-0.995117	0.000210077	-0.75293	0.000210063	-0.920898	0.000210091	-1.07324	0.000210091	-0.913086	0.000210095
105.3	-0.870117	0.000210085	-0.995117	0.000210075	-0.75293	0.000210061	-0.94043	0.000210089	-1.07324	0.000210089	-0.913086	0.000210092
105.4	-0.870117	0.000210083	-0.995117	0.000210073	-0.75293	0.000210059	-0.932617	0.000210087	-1.07324	0.000210087	-0.913086	0.00021009
105.5	-0.873047	0.000210081	-0.998047	0.000210071	-0.755859	0.000210057	-0.916015	0.000210085	-1.07617	0.000210085	-0.916015	0.000210088
105.6	-0.87207	0.000210079	-0.99707	0.000210068	-0.754883	0.000210054	-0.915039	0.000210083	-1.0752	0.000210082	-0.90332	0.000210086
105.7	-0.87207	0.000210076	-0.99707	0.000210066	-0.754883	0.000210052	-0.915039	0.00021008	-1.06348	0.00021008	-0.90332	0.000210083
105.8	-0.875	0.000210074	-0.988281	0.000210064	-0.746094	0.00021005	-0.925781	0.000210078	-1.06641	0.000210078	-0.90625	0.000210081
105.9	-0.872071	0.000210072	-0.985352	0.000210062	-0.743164	0.000210048	-0.934571	0.000210076	-1.06348	0.000210076	-0.903321	0.000210079
106	-0.87207	0.00021007	-0.993164	0.000210059	-0.750976	0.000210046	-0.942383	0.000210074	-1.07129	0.000210073	-0.911133	0.000210077
106.1	-0.869141	0.000210067	-0.982422	0.000210057	-0.748047	0.000210043	-0.927734	0.000210071	-1.06836	0.000210071	-0.908203	0.000210074
106.2	-0.874024	0.000210065	-0.995117	0.000210055	-0.75293	0.000210041	-0.952149	0.000210069	-1.07324	0.000210069	-0.913086	0.000210072
106.3	-0.876953	0.000210063	-1.00977	0.000210053	-0.755859	0.000210039	-0.947265	0.000210067	-1.07617	0.000210067	-0.916015	0.00021007
106.4	-0.876953	0.000210061	-1.01758	0.00021005	-0.755859	0.000210037	-0.955078	0.000210065	-1.07617	0.000210064	-0.916016	0.000210068
106.5	-0.874023	0.000210058	-1.01465	0.000210048	-0.75293	0.000210034	-0.944336	0.000210062	-1.07324	0.000210062	-0.913086	0.000210066
106.6	-0.874023	0.000210056	-1.02637	0.000210046	-0.75293	0.000210032	-0.983398	0.00021006	-1.08496	0.00021006	-0.905273	0.000210063
106.7	-0.874023	0.000210054	-1.02637	0.000210044	-0.75293	0.00021003	-0.952148	0.000210058	-1.08496	0.000210058	-0.905273	0.000210061
106.8	-0.874023	0.000210052	-1.02637	0.000210042	-0.75293	0.000210028	-0.963867	0.000210056	-1.09277	0.000210056	-0.905273	0.000210059
106.9	-0.876953	0.00021005	-1.0293	0.000210039	-0.755859	0.000210026	-0.947266	0.000210054	-1.0957	0.000210053	-0.908203	0.000210057
107	-0.87207	0.000210047	-1.03223	0.000210037	-0.750977	0.000210023	-0.993164	0.000210051	-1.09082	0.000210051	-0.90332	0.000210054
107.1	-0.87207	0.000210045	-1.02441	0.000210035	-0.762695	0.000210021	-0.993164	0.000210049	-1.09082	0.000210049	-0.90332	0.000210052
107.2	-0.87207	0.000210043	-1.02441	0.000210033	-0.762695	0.000210019	-0.993164	0.000210047	-1.09082	0.000210047	-0.90332	0.00021005
107.3	-0.87207	0.000210041	-1.03223	0.00021003	-0.750977	0.000210017	-0.973633	0.000210045	-1.09082	0.000210044	-0.90332	0.000210048
107.4	-0.869141	0.000210038	-1.0293	0.000210028	-0.748047	0.000210014	-0.998047	0.000210042	-1.09961	0.000210042	-0.900391	0.000210046
107.5	-0.871094	0.000210036	-1.03125	0.000210026	-0.75	0.000210012	-1.01953	0.00021004	-1.08984	0.00021004	-0.910156	0.000210043
107.6	-0.869141	0.000210034	-1.0293	0.000210024	-0.748047	0.00021001	-1.0293	0.000210038	-1.09961	0.000210038	-0.908203	0.000210041
107.7	-0.869141	0.000210032	-1.0293	0.000210022	-0.740234	0.000210008	-1.01758	0.000210036	-1.09961	0.000210036	-0.908203	0.000210039
107.8	-0.871094	0.00021003	-1.02344	0.000210019	-0.742187	0.000210006	-0.992187	0.000210034	-1.10156	0.000210033	-0.902344	0.000210037
107.9	-0.862304	0.000210027	-1.03418	0.000210017	-0.745117	0.000210003	-1.00293	0.000210031	-1.1123	0.000210031	-0.905273	0.000210034
108	-0.857422	0.000210025	-1.04102	0.000210015	-0.748047	0.000210001	-1.0293	0.000210029	-1.10742	0.000210029	-0.900391	0.000210032
108.1	-0.857422	0.000210023	-1.04102	0.000210013	-0.748047	0.000209999	-1.06055	0.000210027	-1.10742	0.000210027	-0.900391	0.00021003
108.2	-0.854492	0.000210021	-1.03809	0.00021001	-0.745117	0.000209997	-1.05762	0.000210025	-1.10449	0.000210024	-0.897461	0.000210028
108.3	-0.856445	0.000210018	-1.04004	0.000210008	-0.74707	0.000209994	-1.05957	0.000210022	-1.11816	0.000210022	-0.899414	0.000210026
108.4	-0.855469	0.000210016	-1.03906	0.000210006	-0.746094	0.000209992	-1.03906	0.00021002	-1.11719	0.00021002	-0.898438	0.000210023
108.5	-0.855469	0.000210014	-1.03906	0.000210004	-0.746094	0.00020999	-1.04688	0.000210018	-1.11719	0.000210018	-0.886719	0.000210021
108.6	-0.852539	0.000210012	-1.03613	0.000210001	-0.743164	0.000209988	-1.05566	0.000210016	-1.11426	0.000210016	-0.883789	0.000210019
108.7	-0.867188	0.00021001	-1.01953	0.000209999	-0.746094	0.000209985	-1.05859	0.000210014	-1.125	0.000210013	-0.878906	0.000210017
108.8	-0.852539	0.000210007	-1.0166	0.000209997	-0.754883	0.000209983	-1.04395	0.000210011	-1.12207	0.000210011	-0.875977	0.000210014
108.9	-0.855469	0.000210005	-1.01953	0.000209995	-0.746094	0.000209981	-1.04687	0.000210009	-1.13672	0.000210009	-0.878906	0.000210012
109	-0.84961	0.000210003	-1.01367	0.000209993	-0.740235	0.000209979	-1.02148	0.000210007	-1.13086	0.000210007	-0.88086	0.00021001
109.1	-0.852539	0.000210001	-1.0166	0.00020999	-0.743164	0.000209977	-1.03613	0.000210005	-1.13379	0.000210004	-0.883789	0.000210008
109.2	-0.852539	0.000209998	-1.0166	0.000209988	-0.743164	0.000209974	-1.02441	0.000210002	-1.13379	0.000210002	-0.883789	0.000210005
109.3	-0.842773	0.000209996	-1.01465	0.000209986	-0.733398	0.000209972	-1.02246	0.00021	-1.13184	0.00021	-0.874023	0.000210003
109.4	-0.847656	0.000209994	-1.01953	0.000209984	-0.738281	0.00020997	-1.02734	0.000209998	-1.125	0.000209998	-0.878906	0.000210001
109.5	-0.844727	0.000209992	-1.02441	0.000209981	-0.743164	0.000209968	-0.985352	0.000209996	-1.12207	0.000209995	-0.875977	0.000209999
109.6	-0.845703	0.000209989	-1.01758	0.000209979	-0.74414	0.000209965	-1.01367	0.000209993	-1.12305	0.000209993	-0.865234	0.000209997
109.7	-0.845703	0.000209987	-1.01758	0.000209977	-0.736328	0.000209963	-1.07617	0.000209991	-1.12305	0.000209991	-0.865234	0.000209994
109.8	-0.842773	0.000209985	-1.01465	0.000209975	-0.733398	0.000209961	-1.08105	0.000209989	-1.12012	0.000209989	-0.862305	0.000209992
109.9	-0.845703	0.000209983	-1.01758	0.000209973	-0.736328	0.000209959	-1.01367	0.000209987	-1.12305	0.000209987	-0.865234	0.00020999
110	-0.847656	0.000209981	-1.01953	0.00020997	-0.738281	0.000209957	-0.976563	0.000209985	-1.13672	0.000209984	-0.867188	0.000209988
110.1	-0.847656	0.000209978	-1.01953	0.000209968	-0.738281	0.000209954	-0.996094	0.000209982	-1.13672	0.000209982	-0.867187	0.000209985
110.2	-0.845703	0.000209976	-1.01758	0.000209966	-0.736328	0.000209952	-0.986328	0.00020998	-1.13477	0.00020998	-0.865234	0.000209983
110.3	-0.847656	0.000209974	-1.01953	0.000209964	-0.738281	0.00020995	-1.01562	0.000209978	-1.13672	0.000209978	-0.867187	0.000209981
110.4	-0.833008	0.000209972	-1.0166	0.000209961	-0.735352	0.000209948	-1.03613	0.000209976	-1.13379	0.000209975	-0.864258	0.000209979
110.5	-0.844727	0.000209969	-1.00488	0.000209959	-0.723633	0.000209945	-1.03613	0.000209973	-1.13379	0.000209973	-0.856445	0.000209977
110.6	-0.844727	0.000209967	-1.0166	0.000209957	-0.735352	0.000209943	-0.973633	0.000209971	-1.13379	0.000209971	-0.856446	0.000209974
110.7	-0.847656	0.000209965	-1.00781	0.000209955	-0.726563	0.000209941	-1.00781	0.000209969	-1.13672	0.000209969	-0.859375	0.000209972
110.8	-0.847656	0.000209963	-1.00781	0.000209953	-0.726563	0.000209939	-0.9375	0.000209967	-1.13672	0.000209967	-0.859375	0.00020997
110.9	-0.847656	0.000209961	-1.00781	0.00020995	-0.738281	0.000209937	-0.886719	0.000209965	-1.13672	0.000209964	-0.867188	0.000209968
111	-0.847656	0.000209958	-1.00781	0.000209948	-0.738281	0.000209934	-0.855469	0.000209962	-1.13672	0.000209962	-0.867188	0.000209965
111.1	-0.847656	0.000209956	-1.00781	0.000209946	-0.738281	0.000209932	-0.917969	0.00020996	-1.13672	0.00020996	-0.867187	0.000209963
111.2	-0.847656	0.000209954	-1.01953	0.000209944	-0.726563	0.00020993	-0.898438	0.000209958	-1.13672	0.000209958	-0.867188	0.000209961
111.3	-0.847656	0.000209952	-1.00781	0.000209941	-0.738281	0.000209928	-0.847656	0.000209956	-1.13672	0.000209955	-0.867188	0.000209959
111.4	-0.847656	0.000209949	-1.00781	0.000209939	-0.726562	0.000209925	-0.867187	0.000209953	-1.13672	0.000209953	-0.867187	0.000209957
111.5	-0.845703	0.000209947	-1.00586	0.000209937	-0.724609	0.000209923	-0.806641	0.000209951	-1.13477	0.000209951	-0.857422	0.000209954
111.6	-0.847656	0.000209945	-1	0.000209935	-0.726562	0.000209921	-0.816406	0.000209949	-1.13672	0.000209949	-0.859375	0.000209952
111.7	-0.844727	0.000209943	-0.985352	0.000209933	-0.723633	0.000209919	-0.813477	0.000209947	-1.13379	0.000209947	-0.864258	0.00020995
111.8	-0.852539	0.000209941	-0.985352	0.00020993	-0.735352	0.000209916	-0.762695	0.000209945	-1.13379	0.000209944	-0.864258	0.000209948
111.9	-0.850586	0.000209938	-0.983398	0.000209928	-0.72168	0.000209914	-0.75293	0.000209942	-1.13184	0.000209942	-0.862305	0.000209945
112	-0.850586	0.000209936	-0.983398	0.000209926	-0.72168	0.000209912	-0.733398	0.00020994	-1.13184	0.00020994	-0.862305	0.000209943
112.1	-0.849609	0.000209934	-0.982422	0.000209924	-0.720703	0.00020991	-0.751953	0.000209938	-1.13086	0.000209938	-0.861328	0.000209941
112.2	-0.849609	0.000209932	-0.982422	0.000209921	-0.720703	0.000209908	-0.810547	0.000209936	-1.13086	0.000209935	-0.861328	0.000209939
112.3	-0.859375	0.000209929	-0.972656	0.000209919	-0.71875	0.000209905	-0.839844	0.000209933	-1.12891	0.000209933	-0.859375	0.000209936
112.4	-0.863281	0.000209927	-0.984375	0.000209917	-0.722656	0.000209903	-0.875	0.000209931	-1.13281	0.000209931	-0.863281	0.000209934
112.5	-0.861328	0.000209925	-0.974609	0.000209915	-0.732422	0.000209901	-0.892578	0.000209929	-1.13086	0.000209929	-0.861328	0.000209932
112.6	-0.861328	0.000209923	-0.974609	0.000209912	-0.732422	0.000209899	-0.919922	0.000209927	-1.11914	0.000209926	-0.861328	0.00020993
112.7	-0.863281	0.00020992	-0.976563	0.00020991	-0.734375	0.000209896	-0.894531	0.000209924	-1.12109	0.000209924	-0.863281	0.000209928
112.8	-0.863281	0.000209918	-0.976563	0.000209908	-0.734375	0.000209894	-0.882813	0.000209922	-1.12109	0.000209922	-0.863281	0.000209925
112.9	-0.861328	0.000209916	-0.974609	0.000209906	-0.732422	0.000209892	-0.900391	0.00020992	-1.11133	0.00020992	-0.873047	0.000209923
113	-0.863281	0.000209914	-0.976562	0.000209904	-0.734375	0.00020989	-0.902344	0.000209918	-1.11328	0.000209918	-0.875	0.000209921
113.1	-0.863281	0.000209912	-0.976563	0.000209901	-0.734375	0.000209888	-0.902344	0.000209916	-1.11328	0.000209915	-0.875	0.000209919
113.2	-0.863281	0.000209909	-0.976563	0.000209899	-0.734375	0.000209885	-0.894531	0.000209913	-1.11328	0.000209913	-0.875	0.000209916
113.3	-0.863281	0.000209907	-0.976563	0.000209897	-0.734375	0.000209883	-0.882813	0.000209911	-1.12109	0.000209911	-0.875	0.000209914
113.4	-0.863281	0.000209905	-0.976563	0.000209895	-0.722656	0.000209881	-0.914063	0.000209909	-1.11328	0.000209909	-0.875	0.000209912
113.5	-0.871094	0.000209903	-0.984375	0.000209892	-0.734375	0.000209879	-0.941406	0.000209907	-1.11328	0.000209906	-0.863281	0.00020991
113.6	-0.874023	0.0002099	-0.979492	0.00020989	-0.737304	0.000209876	-0.944336	0.000209904	-1.11621	0.000209904	-0.877929	0.000209908
113.7	-0.880859	0.000209898	-0.974609	0.000209888	-0.732422	0.000209874	-0.951172	0.000209902	-1.11133	0.000209902	-0.873047	0.000209905
113.8	-0.882813	0.000209896	-0.976563	0.000209886	-0.742188	0.000209872	-0.972656	0.0002099	-1.11328	0.0002099	-0.875	0.000209903
113.9	-0.882812	0.000209894	-0.976562	0.000209884	-0.742187	0.00020987	-0.972656	0.000209898	-1.11328	0.000209898	-0.863281	0.000209901
114	-0.880859	0.000209892	-0.974609	0.000209881	-0.732422	0.000209868	-0.962891	0.000209896	-1.11133	0.000209895	-0.861328	0.000209899
114.1	-0.881836	0.000209889	-0.975586	0.000209879	-0.733398	0.000209865	-0.952148	0.000209893	-1.10059	0.000209893	-0.862305	0.000209896
114.2	-0.893555	0.000209887	-0.983398	0.000209877	-0.733398	0.000209863	-0.932617	0.000209891	-1.10059	0.000209891	-0.874023	0.000209894
114.3	-0.893555	0.000209885	-0.983398	0.000209875	-0.741211	0.000209861	-0.932617	0.000209889	-1.10059	0.000209889	-0.874023	0.000209892
114.4	-0.883789	0.000209883	-0.985352	0.000209872	-0.743164	0.000209859	-0.90332	0.000209887	-1.10254	0.000209886	-0.875977	0.00020989
114.5	-0.883789	0.00020988	-0.985352	0.00020987	-0.743164	0.000209856	-0.895508	0.000209884	-1.10254	0.000209884	-0.875977	0.000209888
114.6	-0.898438	0.000209878	-0.988281	0.000209868	-0.746094	0.000209854	-0.945313	0.000209882	-1.10547	0.000209882	-0.878906	0.000209885
114.7	-0.898438	0.000209876	-0.988281	0.000209866	-0.746094	0.000209852	-0.945313	0.00020988	-1.10547	0.00020988	-0.878906	0.000209883
114.8	-0.90625	0.000209874	-0.980469	0.000209864	-0.738281	0.00020985	-0.957031	0.000209878	-1.10547	0.000209878	-0.878906	0.000209881
114.9	-0.90625	0.000209872	-0.980469	0.000209861	-0.746094	0.000209848	-0.945313	0.000209876	-1.10547	0.000209875	-0.878906	0.000209879
115	-0.90625	0.000209869	-0.980469	0.000209859	-0.746094	0.000209845	-0.90625	0.000209873	-1.09766	0.000209873	-0.878906	0.000209876
115.1	-0.90625	0.000209867	-0.980469	0.000209857	-0.746094	0.000209843	-0.90625	0.000209871	-1.09766	0.000209871	-0.878906	0.000209874
115.2	-0.917969	0.000209865	-0.980469	0.000209855	-0.746094	0.000209841	-0.917969	0.000209869	-1.10547	0.000209869	-0.878906	0.000209872
115.3	-0.930664	0.000209863	-0.985351	0.000209852	-0.750976	0.000209839	-0.821289	0.000209867	-1.11035	0.000209866	-0.891601	0.00020987
115.4	-0.927734	0.00020986	-0.990234	0.00020985	-0.759766	0.000209836	-0.720703	0.000209864	-1.10742	0.000209864	-0.888672	0.000209868
115.5	-0.927734	0.000209858	-0.990234	0.000209848	-0.759766	0.000209834	-0.728516	0.000209862	-1.10742	0.000209862	-0.888672	0.000209865
115.6	-0.925781	0.000209856	-0.988281	0.000209846	-0.757813	0.000209832	-0.675781	0.00020986	-1.10547	0.00020986	-0.898438	0.000209863
115.7	-0.925781	0.000209854	-0.988281	0.000209844	-0.757813	0.00020983	-0.636719	0.000209858	-1.10547	0.000209858	-0.898438	0.000209861
115.8	-0.940429	0.000209852	-0.991211	0.000209841	-0.760742	0.000209828	-0.620117	0.000209856	-1.12012	0.000209855	-0.901367	0.000209859
115.9	-0.922852	0.000209849	-0.985352	0.000209839	-0.754883	0.000209825	-0.633789	0.000209853	-1.11426	0.000209853	-0.895508	0.000209856
116	-0.925781	0.000209847	-0.988281	0.000209837	-0.746094	0.000209823	-0.636719	0.000209851	-1.10547	0.000209851	-0.90625	0.000209854
116.1	-0.9375	0.000209845	-0.988281	0.000209835	-0.757813	0.000209821	-0.675781	0.000209849	-1.10547	0.000209849	-0.90625	0.000209852
116.2	-0.93457	0.000209843	-0.985352	0.000209832	-0.754883	0.000209819	-0.68457	0.000209847	-1.09473	0.000209846	-0.90332	0.00020985
116.3	-0.93457	0.00020984	-0.985352	0.00020983	-0.754883	0.000209816	-0.754883	0.000209844	-1.09473	0.000209844	-0.915039	0.000209847
116.4	-0.93457	0.000209838	-0.985352	0.000209828	-0.754883	0.000209814	-0.844727	0.000209842	-1.09473	0.000209842	-0.915039	0.000209845
116.5	-0.93457	0.000209836	-0.985352	0.000209826	-0.754883	0.000209812	-0.844727	0.00020984	-1.09473	0.00020984	-0.915039	0.000209843
116.6	-0.934571	0.000209834	-0.985352	0.000209823	-0.754883	0.00020981	-0.875977	0.000209838	-1.09473	0.000209837	-0.915039	0.000209841
116.7	-0.9375	0.000209831	-0.988281	0.000209821	-0.757813	0.000209807	-0.9375	0.000209835	-1.09766	0.000209835	-0.917969	0.000209839
116.8	-0.939453	0.000209829	-1.00195	0.000209819	-0.759766	0.000209805	-0.927734	0.000209833	-1.09961	0.000209833	-0.919922	0.000209836
116.9	-0.939453	0.000209827	-1.00195	0.000209817	-0.759766	0.000209803	-0.919922	0.000209831	-1.09961	0.000209831	-0.919922	0.000209834
117	-0.939453	0.000209825	-1.00195	0.000209815	-0.771484	0.000209801	-0.908203	0.000209829	-1.09961	0.000209829	-0.931641	0.000209832
117.1	-0.9375	0.000209823	-1.00781	0.000209812	-0.769531	0.000209799	-0.90625	0.000209827	-1.09766	0.000209826	-0.929688	0.00020983
117.2	-0.93457	0.00020982	-1.00488	0.00020981	-0.766602	0.000209796	-0.90332	0.000209824	-1.09473	0.000209824	-0.93457	0.000209827
117.3	-0.9375	0.000209818	-1	0.000209808	-0.769531	0.000209794	-0.898438	0.000209822	-1.09766	0.000209822	-0.9375	0.000209825
117.4	-0.9375	0.000209816	-1	0.000209806	-0.769531	0.000209792	-0.886719	0.00020982	-1.09766	0.00020982	-0.9375	0.000209823
117.5	-0.93457	0.000209814	-0.99707	0.000209803	-0.766602	0.00020979	-0.895508	0.000209818	-1.09473	0.000209817	-0.93457	0.000209821
117.6	-0.9375	0.000209811	-1	0.000209801	-0.777344	0.000209787	-0.898438	0.000209815	-1.09766	0.000209815	-0.9375	0.000209819
117.7	-0.9375	0.000209809	-1	0.000209799	-0.769531	0.000209785	-0.898438	0.000209813	-1.09766	0.000209813	-0.949219	0.000209816
117.8	-0.939453	0.000209807	-1.00195	0.000209797	-0.771484	0.000209783	-0.900391	0.000209811	-1.09961	0.000209811	-0.939453	0.000209814
117.9	-0.927734	0.000209805	-1.00195	0.000209795	-0.771484	0.000209781	-0.908203	0.000209809	-1.09961	0.000209809	-0.939453	0.000209812
118	-0.942383	0.000209803	-1.00488	0.000209792	-0.774414	0.000209779	-0.911133	0.000209807	-1.10254	0.000209806	-0.954102	0.00020981
118.1	-0.942383	0.0002098	-1.0127	0.00020979	-0.782227	0.000209776	-0.90332	0.000209804	-1.10254	0.000209804	-0.954102	0.000209807
118.2	-0.945313	0.000209798	-1.01563	0.000209788	-0.785156	0.000209774	-0.894531	0.000209802	-1.10547	0.000209802	-0.957031	0.000209805
118.3	-0.933594	0.000209796	-1.01563	0.000209786	-0.785156	0.000209772	-0.894531	0.0002098	-1.10547	0.0002098	-0.945313	0.000209803
118.4	-0.933594	0.000209794	-1.01563	0.000209783	-0.785156	0.00020977	-0.894531	0.000209798	-1.10547	0.000209797	-0.945313	0.000209801
118.5	-0.930664	0.000209791	-1.0127	0.000209781	-0.782227	0.000209767	-0.90332	0.000209795	-1.10254	0.000209795	-0.942383	0.000209799
118.6	-0.928711	0.000209789	-1.01074	0.000209779	-0.772461	0.000209765	-0.889649	0.000209793	-1.08887	0.000209793	-0.94043	0.000209796
118.7	-0.930664	0.000209787	-1.0127	0.000209777	-0.774414	0.000209763	-0.90332	0.000209791	-1.09082	0.000209791	-0.942383	0.000209794
118.8	-0.930664	0.000209785	-1.0127	0.000209775	-0.774414	0.000209761	-0.90332	0.000209789	-1.09082	0.000209789	-0.942383	0.000209792
118.9	-0.942383	0.000209783	-1.0127	0.000209772	-0.774414	0.000209759	-0.891601	0.000209787	-1.09082	0.000209786	-0.954101	0.00020979
119	-0.928711	0.00020978	-1.01074	0.00020977	-0.772461	0.000209756	-0.889649	0.000209784	-1.08887	0.000209784	-0.952149	0.000209787
119.1	-0.930664	0.000209778	-1.0127	0.000209768	-0.774414	0.000209754	-0.891602	0.000209782	-1.09082	0.000209782	-0.954102	0.000209785
119.2	-0.933594	0.000209776	-1.01563	0.000209766	-0.785156	0.000209752	-0.894531	0.00020978	-1.09375	0.00020978	-0.957031	0.000209783
119.3	-0.933594	0.000209774	-1.02734	0.000209763	-0.785156	0.00020975	-0.894531	0.000209778	-1.09375	0.000209777	-0.957031	0.000209781
119.4	-0.935547	0.000209771	-1.01758	0.000209761	-0.787109	0.000209747	-0.908203	0.000209775	-1.08789	0.000209775	-0.958984	0.000209779
119.5	-0.930664	0.000209769	-1.0127	0.000209759	-0.782227	0.000209745	-0.903321	0.000209773	-1.08301	0.000209773	-0.961914	0.000209776
119.6	-0.932617	0.000209767	-1.01465	0.000209757	-0.78418	0.000209743	-0.905273	0.000209771	-1.08496	0.000209771	-0.963867	0.000209774
119.7	-0.935547	0.000209765	-1.01758	0.000209755	-0.787109	0.000209741	-0.916016	0.000209769	-1.08789	0.000209769	-0.966797	0.000209772
119.8	-0.932617	0.000209763	-1.01465	0.000209752	-0.78418	0.000209739	-0.905273	0.000209767	-1.08496	0.000209766	-0.963867	0.00020977
119.9	-0.938477	0.00020976	-1.02051	0.00020975	-0.790039	0.000209736	-0.918945	0.000209764	-1.0791	0.000209764	-0.969727	0.000209767
120	-0.938477	0.000209758	-1.02051	0.000209748	-0.790039	0.000209734	-0.899414	0.000209762	-1.0791	0.000209762	-0.969727	0.000209765
120.1	-0.938477	0.000209756	-1.02051	0.000209746	-0.801758	0.000209732	-0.891602	0.00020976	-1.0791	0.00020976	-0.969727	0.000209763
120.2	-0.938476	0.000209754	-1.02051	0.000209743	-0.801758	0.00020973	-0.879883	0.000209758	-1.0791	0.000209757	-0.969726	0.000209761
120.3	-0.932617	0.000209751	-1.01465	0.000209741	-0.795899	0.000209727	-0.874024	0.000209755	-1.07324	0.000209755	-0.963867	0.000209759
120.4	-0.935547	0.000209749	-1.01758	0.000209739	-0.798828	0.000209725	-0.888672	0.000209753	-1.07617	0.000209753	-0.966797	0.000209756
120.5	-0.932617	0.000209747	-1.01465	0.000209737	-0.803711	0.000209723	-0.874023	0.000209751	-1.07324	0.000209751	-0.963867	0.000209754
120.6	-0.935547	0.000209745	-1.01758	0.000209735	-0.806641	0.000209721	-0.876953	0.000209749	-1.07617	0.000209749	-0.966797	0.000209752
120.7	-0.938476	0.000209743	-1.03223	0.000209732	-0.80957	0.000209719	-0.879883	0.000209747	-1.06738	0.000209746	-0.969726	0.00020975
120.8	-0.932617	0.00020974	-1.01465	0.00020973	-0.803711	0.000209716	-0.885742	0.000209744	-1.06152	0.000209744	-0.963867	0.000209747
120.9	-0.935547	0.000209738	-1.0293	0.000209728	-0.806641	0.000209714	-0.888672	0.000209742	-1.06445	0.000209742	-0.966797	0.000209745
121	-0.935547	0.000209736	-1.01758	0.000209726	-0.806641	0.000209712	-0.876953	0.00020974	-1.05664	0.00020974	-0.966797	0.000209743
121.1	-0.935547	0.000209734	-1.01758	0.000209723	-0.806641	0.00020971	-0.876953	0.000209738	-1.05664	0.000209737	-0.966797	0.000209741
121.2	-0.927734	0.000209731	-1.01758	0.000209721	-0.806641	0.000209707	-0.876953	0.000209735	-1.05664	0.000209735	-0.958984	0.000209739
121.3	-0.924805	0.000209729	-1.02637	0.000209719	-0.803711	0.000209705	-0.874023	0.000209733	-1.05371	0.000209733	-0.956055	0.000209736
121.4	-0.924805	0.000209727	-1.01465	0.000209717	-0.803711	0.000209703	-0.874023	0.000209731	-1.05371	0.000209731	-0.956055	0.000209734
121.5	-0.921875	0.000209725	-1.00391	0.000209715	-0.800781	0.000209701	-0.859375	0.000209729	-1.05078	0.000209729	-0.953125	0.000209732
121.6	-0.921875	0.000209723	-1.00391	0.000209712	-0.800781	0.000209699	-0.859375	0.000209727	-1.05078	0.000209726	-0.953125	0.00020973
121.7	-0.919922	0.00020972	-1.00195	0.00020971	-0.798828	0.000209696	-0.869141	0.000209724	-1.04883	0.000209724	-0.951172	0.000209727
121.8	-0.923828	0.000209718	-1.00586	0.000209708	-0.802734	0.000209694	-0.873047	0.000209722	-1.05273	0.000209722	-0.955078	0.000209725
121.9	-0.924804	0.000209716	-1.00684	0.000209706	-0.795898	0.000209692	-0.885742	0.00020972	-1.04199	0.00020972	-0.956054	0.000209723
122	-0.923828	0.000209714	-1.00586	0.000209703	-0.794922	0.00020969	-0.892578	0.000209718	-1.04102	0.000209717	-0.955078	0.000209721
122.1	-0.923828	0.000209711	-1.01367	0.000209701	-0.794922	0.000209687	-0.873047	0.000209715	-1.04102	0.000209715	-0.943359	0.000209719
122.2	-0.927734	0.000209709	-1.00977	0.000209699	-0.798828	0.000209685	-0.857422	0.000209713	-1.03711	0.000209713	-0.951172	0.000209716
122.3	-0.927734	0.000209707	-1.00977	0.000209697	-0.798828	0.000209683	-0.869141	0.000209711	-1.03711	0.000209711	-0.951172	0.000209714
122.4	-0.930664	0.000209705	-1.0127	0.000209695	-0.801758	0.000209681	-0.833008	0.000209709	-1.04004	0.000209709	-0.942383	0.000209712
122.5	-0.930664	0.000209703	-1.0127	0.000209692	-0.793945	0.000209679	-0.833008	0.000209707	-1.04004	0.000209706	-0.942383	0.00020971
122.6	-0.927734	0.0002097	-1.00977	0.00020969	-0.779297	0.000209676	-0.837891	0.000209704	-1.03711	0.000209704	-0.939453	0.000209707
122.7	-0.924805	0.000209698	-0.999023	0.000209688	-0.776367	0.000209674	-0.84668	0.000209702	-1.03418	0.000209702	-0.936523	0.000209705
122.8	-0.927734	0.000209696	-1.00195	0.000209686	-0.779297	0.000209672	-0.857422	0.0002097	-1.03711	0.0002097	-0.939453	0.000209703
122.9	-0.927734	0.000209694	-1.00977	0.000209683	-0.779297	0.00020967	-0.837891	0.000209698	-1.04883	0.000209697	-0.939453	0.000209701
123	-0.924805	0.000209691	-1.00684	0.000209681	-0.776367	0.000209667	-0.834961	0.000209695	-1.03418	0.000209695	-0.936523	0.000209699
123.1	-0.93457	0.000209689	-1.00488	0.000209679	-0.774414	0.000209665	-0.844727	0.000209693	-1.04395	0.000209693	-0.926758	0.000209696
123.2	-0.936523	0.000209687	-1.00684	0.000209677	-0.776367	0.000209663	-0.866211	0.000209691	-1.0459	0.000209691	-0.928711	0.000209694
123.3	-0.93457	0.000209685	-1.00488	0.000209675	-0.774414	0.000209661	-0.875977	0.000209689	-1.04395	0.000209689	-0.926758	0.000209692
123.4	-0.93457	0.000209683	-1.00488	0.000209672	-0.774414	0.000209659	-0.875977	0.000209687	-1.04395	0.000209686	-0.926758	0.00020969
123.5	-0.931641	0.00020968	-1.00195	0.00020967	-0.771484	0.000209656	-0.873047	0.000209684	-1.04102	0.000209684	-0.923828	0.000209687
123.6	-0.931641	0.000209678	-1.00195	0.000209668	-0.771484	0.000209654	-0.880859	0.000209682	-1.04102	0.000209682	-0.923828	0.000209685
123.7	-0.929688	0.000209676	-0.992188	0.000209666	-0.769531	0.000209652	-0.847656	0.00020968	-1.03906	0.00020968	-0.921875	0.000209683
123.8	-0.927734	0.000209674	-0.990234	0.000209663	-0.767578	0.00020965	-0.845703	0.000209678	-1.03711	0.000209677	-0.919922	0.000209681
123.9	-0.927734	0.000209671	-0.990234	0.000209661	-0.767578	0.000209647	-0.80664	0.000209675	-1.03711	0.000209675	-0.919922	0.000209678
124	-0.918946	0.000209669	-0.989258	0.000209659	-0.758789	0.000209645	-0.797852	0.000209673	-1.02832	0.000209673	-0.911133	0.000209676
124.1	-0.921875	0.000209667	-0.992187	0.000209657	-0.761719	0.000209643	-0.832031	0.000209671	-1.03906	0.000209671	-0.914062	0.000209674
124.2	-0.926758	0.000209665	-0.989258	0.000209655	-0.758789	0.000209641	-0.829102	0.000209669	-1.03613	0.000209669	-0.911133	0.000209672
124.3	-0.918945	0.000209663	-0.989258	0.000209652	-0.758789	0.000209639	-0.836914	0.000209667	-1.03613	0.000209666	-0.911133	0.00020967
124.4	-0.924805	0.00020966	-0.987305	0.00020965	-0.756836	0.000209636	-0.84668	0.000209664	-1.0459	0.000209664	-0.90918	0.000209667
124.5	-0.924805	0.000209658	-0.987305	0.000209648	-0.756836	0.000209634	-0.866211	0.000209662	-1.0459	0.000209662	-0.897461	0.000209665
124.6	-0.914063	0.000209656	-0.984375	0.000209646	-0.753906	0.000209632	-0.855469	0.00020966	-1.04297	0.00020966	-0.894531	0.000209663
124.7	-0.911133	0.000209654	-0.981445	0.000209643	-0.750977	0.00020963	-0.860352	0.000209658	-1.05176	0.000209657	-0.891602	0.000209661
124.8	-0.911133	0.000209651	-0.993164	0.000209641	-0.743164	0.000209627	-0.879883	0.000209655	-1.05176	0.000209655	-0.891602	0.000209658
124.9	-0.911133	0.000209649	-0.981445	0.000209639	-0.750977	0.000209625	-0.891602	0.000209653	-1.05176	0.000209653	-0.891602	0.000209656
125	-0.911133	0.000209647	-0.981445	0.000209637	-0.743164	0.000209623	-0.879883	0.000209651	-1.05176	0.000209651	-0.891602	0.000209654
125.1	-0.911133	0.000209645	-0.981445	0.000209635	-0.743164	0.000209621	-0.899414	0.000209649	-1.05957	0.000209649	-0.891602	0.000209652
125.2	-0.911133	0.000209643	-0.981445	0.000209632	-0.743164	0.000209619	-0.911133	0.000209647	-1.05957	0.000209646	-0.879883	0.00020965
125.3	-0.90918	0.00020964	-0.979492	0.00020963	-0.729492	0.000209616	-0.897461	0.000209644	-1.05762	0.000209644	-0.87793	0.000209647
125.4	-0.90918	0.000209638	-0.97168	0.000209628	-0.729492	0.000209614	-0.90918	0.000209642	-1.05762	0.000209642	-0.87793	0.000209645
125.5	-0.911133	0.000209636	-0.981445	0.000209626	-0.731445	0.000209612	-0.930664	0.00020964	-1.05957	0.00020964	-0.87207	0.000209643
125.6	-0.90918	0.000209634	-0.97168	0.000209623	-0.729492	0.00020961	-0.94043	0.000209638	-1.05762	0.000209637	-0.870117	0.000209641
125.7	-0.911133	0.000209631	-0.973633	0.000209621	-0.719726	0.000209607	-0.930664	0.000209635	-1.05957	0.000209635	-0.87207	0.000209638
125.8	-0.907227	0.000209629	-0.977539	0.000209619	-0.71582	0.000209605	-0.915039	0.000209633	-1.05566	0.000209633	-0.875977	0.000209636
125.9	-0.907226	0.000209627	-0.969726	0.000209617	-0.71582	0.000209603	-0.907226	0.000209631	-1.05566	0.000209631	-0.875976	0.000209634
126	-0.904297	0.000209625	-0.966797	0.000209615	-0.705078	0.000209601	-0.892578	0.000209629	-1.05273	0.000209629	-0.865235	0.000209632
126.1	-0.904297	0.000209623	-0.966797	0.000209612	-0.705078	0.000209599	-0.884766	0.000209627	-1.05273	0.000209626	-0.865234	0.00020963
126.2	-0.902344	0.00020962	-0.953125	0.00020961	-0.703125	0.000209596	-0.882813	0.000209624	-1.05078	0.000209624	-0.863281	0.000209627
126.3	-0.899414	0.000209618	-0.961914	0.000209608	-0.700195	0.000209594	-0.879883	0.000209622	-1.04785	0.000209622	-0.868164	0.000209625
126.4	-0.900391	0.000209616	-0.970703	0.000209606	-0.701172	0.000209592	-0.880859	0.00020962	-1.04883	0.00020962	-0.869141	0.000209623
126.5	-0.885742	0.000209614	-0.959961	0.000209603	-0.686523	0.00020959	-0.885742	0.000209618	-1.0459	0.000209617	-0.866211	0.000209621
126.6	-0.880859	0.000209611	-0.955078	0.000209601	-0.681641	0.000209587	-0.873047	0.000209615	-1.04102	0.000209615	-0.861328	0.000209618
126.7	-0.880859	0.000209609	-0.962891	0.000209599	-0.681641	0.000209585	-0.880859	0.000209613	-1.04102	0.000209613	-0.861328	0.000209616
126.8	-0.880859	0.000209607	-0.955078	0.000209597	-0.681641	0.000209583	-0.880859	0.000209611	-1.05273	0.000209611	-0.861328	0.000209614
126.9	-0.87793	0.000209605	-0.959961	0.000209595	-0.670898	0.000209581	-0.87793	0.000209609	-1.0498	0.000209609	-0.870117	0.000209612
127	-0.875	0.000209603	-0.9375	0.000209592	-0.667969	0.000209579	-0.875	0.000209607	-1.04688	0.000209606	-0.867188	0.00020961
127.1	-0.875	0.0002096	-0.9375	0.00020959	-0.667969	0.000209576	-0.875	0.000209604	-1.04687	0.000209604	-0.867187	0.000209607
127.2	-0.886719	0.000209598	-0.957031	0.000209588	-0.667969	0.000209574	-0.875	0.000209602	-1.04688	0.000209602	-0.867188	0.000209605
127.3	-0.886719	0.000209596	-0.949219	0.000209586	-0.667969	0.000209572	-0.875	0.0002096	-1.04688	0.0002096	-0.867188	0.000209603
127.4	-0.887695	0.000209594	-0.950195	0.000209583	-0.668945	0.00020957	-0.868164	0.000209598	-1.04785	0.000209597	-0.868164	0.000209601
127.5	-0.891601	0.000209591	-0.961914	0.000209581	-0.672851	0.000209567	-0.87207	0.000209595	-1.05176	0.000209595	-0.860351	0.000209598
127.6	-0.887695	0.000209589	-0.950195	0.000209579	-0.668945	0.000209565	-0.868164	0.000209593	-1.04785	0.000209593	-0.856445	0.000209596
127.7	-0.886719	0.000209587	-0.9375	0.000209577	-0.667969	0.000209563	-0.855469	0.000209591	-1.05469	0.000209591	-0.855469	0.000209594
127.8	-0.882813	0.000209585	-0.933594	0.000209575	-0.664063	0.000209561	-0.851563	0.000209589	-1.04297	0.000209589	-0.84375	0.000209592
127.9	-0.886719	0.000209583	-0.9375	0.000209572	-0.667969	0.000209559	-0.867187	0.000209587	-1.04687	0.000209586	-0.847656	0.00020959
128	-0.887695	0.00020958	-0.938477	0.00020957	-0.668945	0.000209556	-0.868164	0.000209584	-1.04785	0.000209584	-0.856445	0.000209587
128.1	-0.873047	0.000209578	-0.935547	0.000209568	-0.666016	0.000209554	-0.873047	0.000209582	-1.04492	0.000209582	-0.853516	0.000209585
128.2	-0.873047	0.000209576	-0.935547	0.000209566	-0.666016	0.000209552	-0.873047	0.00020958	-1.04492	0.00020958	-0.845703	0.000209583
128.3	-0.873047	0.000209574	-0.947266	0.000209563	-0.673828	0.00020955	-0.884766	0.000209578	-1.05273	0.000209577	-0.845703	0.000209581
128.4	-0.875977	0.000209571	-0.958008	0.000209561	-0.676758	0.000209547	-0.887695	0.000209575	-1.05566	0.000209575	-0.856445	0.000209579
128.5	-0.870117	0.000209569	-0.97168	0.000209559	-0.670898	0.000209545	-0.881836	0.000209573	-1.0498	0.000209573	-0.850586	0.000209576
128.6	-0.873047	0.000209567	-0.966797	0.000209557	-0.673828	0.000209543	-0.884766	0.000209571	-1.05273	0.000209571	-0.853516	0.000209574
128.7	-0.871094	0.000209565	-0.964844	0.000209555	-0.671875	0.000209541	-0.871094	0.000209569	-1.05078	0.000209569	-0.851563	0.000209572
128.8	-0.871094	0.000209563	-0.972656	0.000209552	-0.671875	0.000209539	-0.871094	0.000209567	-1.04297	0.000209566	-0.851563	0.00020957
128.9	-0.871094	0.00020956	-0.972656	0.00020955	-0.671875	0.000209536	-0.863281	0.000209564	-1.04297	0.000209564	-0.863281	0.000209567
129	-0.868164	0.000209558	-0.969727	0.000209548	-0.668945	0.000209534	-0.860352	0.000209562	-1.04004	0.000209562	-0.860352	0.000209565
129.1	-0.865234	0.000209556	-0.966797	0.000209546	-0.666015	0.000209532	-0.857422	0.00020956	-1.03711	0.00020956	-0.857422	0.000209563
129.2	-0.863281	0.000209554	-0.957031	0.000209543	-0.664063	0.00020953	-0.855469	0.000209558	-1.03516	0.000209557	-0.855469	0.000209561
129.3	-0.865234	0.000209551	-0.978516	0.000209541	-0.666016	0.000209527	-0.857422	0.000209555	-1.03711	0.000209555	-0.857422	0.000209559
129.4	-0.863281	0.000209549	-0.976563	0.000209539	-0.664063	0.000209525	-0.855469	0.000209553	-1.03516	0.000209553	-0.855469	0.000209556
129.5	-0.860352	0.000209547	-0.973633	0.000209537	-0.65332	0.000209523	-0.852539	0.000209551	-1.03223	0.000209551	-0.852539	0.000209554
129.6	-0.860352	0.000209545	-1.00488	0.000209535	-0.65332	0.000209521	-0.84082	0.000209549	-1.02051	0.000209549	-0.852539	0.000209552
129.7	-0.863281	0.000209543	-1.02734	0.000209532	-0.65625	0.000209519	-0.835938	0.000209547	-1.03516	0.000209546	-0.855469	0.00020955
129.8	-0.863281	0.00020954	-1.01563	0.00020953	-0.65625	0.000209516	-0.835938	0.000209544	-1.03516	0.000209544	-0.855469	0.000209547
129.9	-0.860352	0.000209538	-1.0127	0.000209528	-0.65332	0.000209514	-0.833008	0.000209542	-1.02051	0.000209542	-0.852539	0.000209545
130	-0.864258	0.000209536	-1.0166	0.000209526	-0.657227	0.000209512	-0.836914	0.00020954	-1.02441	0.00020954	-0.856445	0.000209543
130.1	-0.864258	0.000209534	-1.04785	0.000209523	-0.657227	0.00020951	-0.836914	0.000209538	-1.02441	0.000209537	-0.856445	0.000209541
130.2	-0.862305	0.000209531	-1.0459	0.000209521	-0.655273	0.000209507	-0.834961	0.000209535	-1.02246	0.000209535	-0.854492	0.000209539
130.3	-0.862305	0.000209529	-1.07324	0.000209519	-0.655273	0.000209505	-0.834961	0.000209533	-1.02246	0.000209533	-0.854492	0.000209536
130.4	-0.859375	0.000209527	-1.07031	0.000209517	-0.660156	0.000209503	-0.832031	0.000209531	-1.01953	0.000209531	-0.851563	0.000209534
130.5	-0.854492	0.000209525	-1.03809	0.000209515	-0.655273	0.000209501	-0.81543	0.000209529	-1.00684	0.000209529	-0.84668	0.000209532
130.6	-0.854492	0.000209523	-1.09668	0.000209512	-0.655273	0.000209499	-0.81543	0.000209527	-1.00684	0.000209526	-0.84668	0.00020953
130.7	-0.854492	0.00020952	-1.07715	0.00020951	-0.655273	0.000209496	-0.81543	0.000209524	-1.00684	0.000209524	-0.84668	0.000209527
130.8	-0.854492	0.000209518	-1.11621	0.000209508	-0.666992	0.000209494	-0.81543	0.000209522	-1.00684	0.000209522	-0.84668	0.000209525
130.9	-0.852539	0.000209516	-1.10645	0.000209506	-0.65332	0.000209492	-0.813477	0.00020952	-0.993164	0.00020952	-0.844727	0.000209523
131	-0.850586	0.000209514	-1.10449	0.000209503	-0.663086	0.00020949	-0.811523	0.000209518	-1.00293	0.000209517	-0.842773	0.000209521
131.1	-0.849609	0.000209511	-1.13086	0.000209501	-0.662109	0.000209487	-0.810547	0.000209515	-1.00195	0.000209515	-0.853516	0.000209519
131.2	-0.847656	0.000209509	-1.16016	0.000209499	-0.660156	0.000209485	-0.808593	0.000209513	-1	0.000209513	-0.851562	0.000209516
131.3	-0.844727	0.000209507	-1.1377	0.000209497	-0.657227	0.000209483	-0.805665	0.000209511	-0.997071	0.000209511	-0.856446	0.000209514
131.4	-0.847656	0.000209505	-1.08203	0.000209495	-0.660156	0.000209481	-0.808594	0.000209509	-1	0.000209509	-0.859375	0.000209512
131.5	-0.84668	0.000209503	-1.0498	0.000209492	-0.65918	0.000209479	-0.799805	0.000209507	-0.999023	0.000209506	-0.858398	0.00020951
131.6	-0.852539	0.0002095	-1.12598	0.00020949	-0.665039	0.000209476	-0.805664	0.000209504	-1.00488	0.000209504	-0.856445	0.000209507
131.7	-0.844727	0.000209498	-1.1377	0.000209488	-0.665039	0.000209474	-0.797852	0.000209502	-1.00488	0.000209502	-0.848633	0.000209505
131.8	-0.849609	0.000209496	-1.21289	0.000209486	-0.669922	0.000209472	-0.791016	0.0002095	-1.00977	0.0002095	-0.853516	0.000209503
131.9	-0.833984	0.000209494	-1.11523	0.000209483	-0.662109	0.00020947	-0.794922	0.000209498	-0.994141	0.000209497	-0.833984	0.000209501
132	-0.833984	0.000209491	-1.08398	0.000209481	-0.673828	0.000209467	-0.783203	0.000209495	-0.994141	0.000209495	-0.845703	0.000209499
132.1	-0.844727	0.000209489	-1.03613	0.000209479	-0.665039	0.000209465	-0.786133	0.000209493	-0.99707	0.000209493	-0.848633	0.000209496
132.2	-0.836914	0.000209487	-0.958008	0.000209477	-0.665039	0.000209463	-0.786133	0.000209491	-1.00488	0.000209491	-0.848633	0.000209494
132.3	-0.834961	0.000209485	-0.866211	0.000209475	-0.674805	0.000209461	-0.78418	0.000209489	-0.995117	0.000209489	-0.84668	0.000209492
132.4	-0.837891	0.000209483	-0.927734	0.000209472	-0.677734	0.000209459	-0.787109	0.000209487	-0.998047	0.000209486	-0.849609	0.00020949
132.5	-0.834961	0.00020948	-0.924805	0.00020947	-0.674805	0.000209456	-0.78418	0.000209484	-0.995117	0.000209484	-0.84668	0.000209487
132.6	-0.839844	0.000209478	-0.808594	0.000209468	-0.679688	0.000209454	-0.789063	0.000209482	-1	0.000209482	-0.851563	0.000209485
132.7	-0.836914	0.000209476	-0.805664	0.000209466	-0.676758	0.000209452	-0.786133	0.00020948	-0.99707	0.00020948	-0.836914	0.000209483
132.8	-0.836914	0.000209474	-0.817383	0.000209463	-0.676758	0.00020945	-0.797852	0.000209478	-0.99707	0.000209477	-0.825195	0.000209481
132.9	-0.841797	0.000209471	-0.935547	0.000209461	-0.685547	0.000209448	-0.783203	0.000209475	-0.994141	0.000209475	-0.833984	0.000209479
133	-0.845703	0.000209469	-0.876953	0.000209459	-0.689453	0.000209445	-0.787109	0.000209473	-0.998047	0.000209473	-0.837891	0.000209476
133.1	-0.845703	0.000209467	-0.806641	0.000209457	-0.697266	0.000209443	-0.787109	0.000209471	-0.998047	0.000209471	-0.826172	0.000209474
133.2	-0.845703	0.000209465	-0.767578	0.000209455	-0.697266	0.000209441	-0.787109	0.000209469	-0.998047	0.000209469	-0.837891	0.000209472
133.3	-0.839844	0.000209463	-0.96875	0.000209452	-0.699219	0.000209439	-0.789063	0.000209467	-1	0.000209466	-0.828125	0.00020947
133.4	-0.847656	0.00020946	-0.949219	0.00020945	-0.699219	0.000209436	-0.789063	0.000209464	-1	0.000209464	-0.828125	0.000209467
133.5	-0.837891	0.000209458	-0.966797	0.000209448	-0.697266	0.000209434	-0.798828	0.000209462	-0.998047	0.000209462	-0.826172	0.000209465
133.6	-0.845703	0.000209456	-0.978516	0.000209446	-0.697266	0.000209432	-0.798828	0.00020946	-0.998047	0.00020946	-0.826172	0.000209463
133.7	-0.84082	0.000209454	-0.969727	0.000209444	-0.700195	0.00020943	-0.801758	0.000209458	-1.00879	0.000209457	-0.829102	0.000209461
133.8	-0.848633	0.000209452	-0.961914	0.000209441	-0.700195	0.000209428	-0.80957	0.000209455	-1.00879	0.000209455	-0.829102	0.000209459
133.9	-0.84082	0.000209449	-0.961914	0.000209439	-0.700195	0.000209425	-0.80957	0.000209453	-1.00098	0.000209453	-0.829102	0.000209456
134	-0.848633	0.000209447	-1.02051	0.000209437	-0.700195	0.000209423	-0.80957	0.000209451	-1.00098	0.000209451	-0.829102	0.000209454
134.1	-0.837891	0.000209445	-1.05664	0.000209435	-0.697266	0.000209421	-0.806641	0.000209449	-0.998047	0.000209449	-0.818359	0.000209452
134.2	-0.83789	0.000209443	-1.06836	0.000209432	-0.697265	0.000209419	-0.80664	0.000209447	-0.998046	0.000209446	-0.826171	0.00020945
134.3	-0.834961	0.00020944	-1.00684	0.00020943	-0.694336	0.000209416	-0.803711	0.000209444	-0.995118	0.000209444	-0.823243	0.000209447
134.4	-0.842773	0.000209438	-0.995117	0.000209428	-0.694336	0.000209414	-0.795898	0.000209442	-0.995117	0.000209442	-0.81543	0.000209445
134.5	-0.842773	0.000209436	-0.995117	0.000209426	-0.694336	0.000209412	-0.795898	0.00020944	-0.995117	0.00020944	-0.81543	0.000209443
134.6	-0.842773	0.000209434	-0.956054	0.000209424	-0.694335	0.00020941	-0.795898	0.000209438	-0.995117	0.000209438	-0.815429	0.000209441
134.7	-0.839844	0.000209432	-0.941406	0.000209421	-0.691406	0.000209408	-0.792969	0.000209436	-0.992188	0.000209435	-0.8125	0.000209439
134.8	-0.839844	0.000209429	-0.921875	0.000209419	-0.691406	0.000209405	-0.792969	0.000209433	-0.992188	0.000209433	-0.8125	0.000209436
134.9	-0.839844	0.000209427	-0.914063	0.000209417	-0.691406	0.000209403	-0.792969	0.000209431	-1	0.000209431	-0.8125	0.000209434
135	-0.839844	0.000209425	-0.914063	0.000209415	-0.691406	0.000209401	-0.800781	0.000209429	-1	0.000209429	-0.8125	0.000209432
135.1	-0.837891	0.000209423	-0.919922	0.000209412	-0.681641	0.000209399	-0.798828	0.000209427	-0.998047	0.000209426	-0.798828	0.00020943
135.2	-0.834961	0.00020942	-0.916992	0.00020941	-0.678711	0.000209396	-0.795898	0.000209424	-0.995117	0.000209424	-0.795898	0.000209427
135.3	-0.84668	0.000209418	-0.916992	0.000209408	-0.678711	0.000209394	-0.795898	0.000209422	-0.995117	0.000209422	-0.795898	0.000209425
135.4	-0.849609	0.000209416	-0.919922	0.000209406	-0.681641	0.000209392	-0.791016	0.00020942	-0.998047	0.00020942	-0.798828	0.000209423
135.5	-0.849609	0.000209414	-0.912109	0.000209404	-0.689453	0.00020939	-0.798828	0.000209418	-0.990234	0.000209418	-0.798828	0.000209421
135.6	-0.84668	0.000209412	-0.90918	0.000209401	-0.678711	0.000209388	-0.795899	0.000209416	-0.987305	0.000209415	-0.795899	0.000209419
135.7	-0.851562	0.000209409	-0.914062	0.000209399	-0.683593	0.000209385	-0.800781	0.000209413	-0.992187	0.000209413	-0.800781	0.000209416
135.8	-0.848633	0.000209407	-0.911133	0.000209397	-0.680665	0.000209383	-0.797852	0.000209411	-0.989258	0.000209411	-0.797852	0.000209414
135.9	-0.84668	0.000209405	-0.916992	0.000209395	-0.678711	0.000209381	-0.795898	0.000209409	-0.975586	0.000209409	-0.795898	0.000209412
136	-0.84668	0.000209403	-0.916992	0.000209392	-0.666992	0.000209379	-0.795898	0.000209407	-0.975586	0.000209406	-0.788086	0.00020941
136.1	-0.844726	0.0002094	-0.915039	0.00020939	-0.665039	0.000209376	-0.793945	0.000209404	-0.973633	0.000209404	-0.786133	0.000209408
136.2	-0.839844	0.000209398	-0.910156	0.000209388	-0.660156	0.000209374	-0.789063	0.000209402	-0.96875	0.000209402	-0.78125	0.000209405
136.3	-0.852539	0.000209396	-0.915039	0.000209386	-0.665039	0.000209372	-0.793945	0.0002094	-0.973633	0.0002094	-0.786133	0.000209403
136.4	-0.850586	0.000209394	-0.905273	0.000209384	-0.651367	0.00020937	-0.791992	0.000209398	-0.97168	0.000209398	-0.78418	0.000209401
136.5	-0.859375	0.000209392	-0.902344	0.000209381	-0.660156	0.000209368	-0.789063	0.000209396	-0.96875	0.000209395	-0.78125	0.000209399
136.6	-0.859375	0.000209389	-0.890625	0.000209379	-0.648438	0.000209365	-0.789063	0.000209393	-0.96875	0.000209393	-0.78125	0.000209396
136.7	-0.859375	0.000209387	-0.902344	0.000209377	-0.648438	0.000209363	-0.789063	0.000209391	-0.96875	0.000209391	-0.78125	0.000209394
136.8	-0.862305	0.000209385	-0.905273	0.000209375	-0.651367	0.000209361	-0.791992	0.000209389	-0.97168	0.000209389	-0.78418	0.000209392
136.9	-0.87207	0.000209383	-0.907227	0.000209372	-0.645508	0.000209359	-0.793945	0.000209387	-0.973633	0.000209386	-0.774414	0.00020939
137	-0.866211	0.00020938	-0.90918	0.00020937	-0.639648	0.000209357	-0.780273	0.000209384	-0.967773	0.000209384	-0.780273	0.000209388
137.1	-0.880859	0.000209378	-0.912109	0.000209368	-0.642578	0.000209354	-0.791016	0.000209382	-0.958984	0.000209382	-0.783203	0.000209385
137.2	-0.880859	0.000209376	-0.912109	0.000209366	-0.630859	0.000209352	-0.783203	0.00020938	-0.958984	0.00020938	-0.783203	0.000209383
137.3	-0.880859	0.000209374	-0.912109	0.000209364	-0.630859	0.00020935	-0.783203	0.000209378	-0.958984	0.000209378	-0.783203	0.000209381
137.4	-0.87793	0.000209372	-0.920898	0.000209361	-0.62793	0.000209348	-0.780273	0.000209376	-0.956055	0.000209375	-0.780273	0.000209379
137.5	-0.883789	0.000209369	-0.926758	0.000209359	-0.633789	0.000209345	-0.786133	0.000209373	-0.961914	0.000209373	-0.786133	0.000209376
137.6	-0.880859	0.000209367	-0.923828	0.000209357	-0.630859	0.000209343	-0.783203	0.000209371	-0.958984	0.000209371	-0.783203	0.000209374
137.7	-0.877929	0.000209365	-0.920898	0.000209355	-0.620117	0.000209341	-0.780273	0.000209369	-0.948242	0.000209369	-0.780273	0.000209372
137.8	-0.873047	0.000209363	-0.916016	0.000209353	-0.615235	0.000209339	-0.783203	0.000209367	-0.94336	0.000209366	-0.775391	0.00020937
137.9	-0.875	0.00020936	-0.917969	0.00020935	-0.617188	0.000209337	-0.785156	0.000209364	-0.945313	0.000209364	-0.777344	0.000209368
138	-0.882813	0.000209358	-0.914063	0.000209348	-0.613281	0.000209334	-0.78125	0.000209362	-0.949219	0.000209362	-0.773438	0.000209365
138.1	-0.868164	0.000209356	-0.911133	0.000209346	-0.610352	0.000209332	-0.770508	0.00020936	-0.946289	0.00020936	-0.770508	0.000209363
138.2	-0.87793	0.000209354	-0.916992	0.000209344	-0.608398	0.00020933	-0.768555	0.000209358	-0.944336	0.000209358	-0.768555	0.000209361
138.3	-0.87793	0.000209352	-0.928711	0.000209341	-0.608398	0.000209328	-0.768555	0.000209356	-0.944336	0.000209355	-0.768555	0.000209359
138.4	-0.87793	0.000209349	-0.928711	0.000209339	-0.608398	0.000209325	-0.756836	0.000209353	-0.944336	0.000209353	-0.768555	0.000209356
138.5	-0.87793	0.000209347	-0.928711	0.000209337	-0.608398	0.000209323	-0.756836	0.000209351	-0.956055	0.000209351	-0.768555	0.000209354
138.6	-0.885742	0.000209345	-0.928711	0.000209335	-0.59668	0.000209321	-0.756836	0.000209349	-0.956055	0.000209349	-0.768555	0.000209352
138.7	-0.875	0.000209343	-0.925781	0.000209333	-0.59375	0.000209319	-0.753906	0.000209347	-0.953125	0.000209347	-0.753906	0.00020935
138.8	-0.87207	0.000209341	-0.930664	0.00020933	-0.59082	0.000209317	-0.750977	0.000209345	-0.950195	0.000209344	-0.750977	0.000209348
138.9	-0.879883	0.000209338	-0.930664	0.000209328	-0.59082	0.000209314	-0.762695	0.000209342	-0.950195	0.000209342	-0.750977	0.000209345
139	-0.879883	0.000209336	-0.942383	0.000209326	-0.59082	0.000209312	-0.762695	0.00020934	-0.950195	0.00020934	-0.750977	0.000209343
139.1	-0.879883	0.000209334	-0.930664	0.000209324	-0.59082	0.00020931	-0.762695	0.000209338	-0.950195	0.000209338	-0.750976	0.000209341
139.2	-0.867188	0.000209332	-0.9375	0.000209321	-0.578125	0.000209308	-0.757813	0.000209336	-0.945313	0.000209335	-0.746094	0.000209339
139.3	-0.867188	0.000209329	-0.9375	0.000209319	-0.585938	0.000209305	-0.757813	0.000209333	-0.945313	0.000209333	-0.757813	0.000209336
139.4	-0.875977	0.000209327	-0.938477	0.000209317	-0.586914	0.000209303	-0.74707	0.000209331	-0.946289	0.000209331	-0.758789	0.000209334
139.5	-0.873047	0.000209325	-0.935547	0.000209315	-0.583984	0.000209301	-0.744141	0.000209329	-0.943359	0.000209329	-0.755859	0.000209332
139.6	-0.871094	0.000209323	-0.933594	0.000209313	-0.582031	0.000209299	-0.742188	0.000209327	-0.941406	0.000209327	-0.753906	0.00020933
139.7	-0.871094	0.000209321	-0.921875	0.00020931	-0.582031	0.000209297	-0.742188	0.000209325	-0.941406	0.000209324	-0.753906	0.000209328
139.8	-0.871094	0.000209318	-0.933594	0.000209308	-0.582031	0.000209294	-0.730469	0.000209322	-0.941406	0.000209322	-0.753906	0.000209325
139.9	-0.865234	0.000209316	-0.927734	0.000209306	-0.576172	0.000209292	-0.724609	0.00020932	-0.935547	0.00020932	-0.748047	0.000209323
140	-0.865234	0.000209314	-0.927734	0.000209304	-0.576172	0.00020929	-0.736328	0.000209318	-0.935547	0.000209318	-0.748047	0.000209321
140.1	-0.865234	0.000209312	-0.927734	0.000209301	-0.576172	0.000209288	-0.736328	0.000209316	-0.935547	0.000209315	-0.748047	0.000209319
[truncated: 2,205 more rows]

## Sheet: Fig 4-fig sup2 PRL GAL
X axis time in seconds	Cycle: 32 GAL 7.8 µM_Y	Fitted Cycle: 32 GAL 7.8 µM_Y	Cycle: 33 GAL 15.6 µM_Y	Fitted Cycle: 33 GAL 15.6 µM_Y	Cycle: 34 GAL 31.2 µM_Y	Fitted Cycle: 34 GAL 31.2 µM_Y	Cycle: 35 GAL 62.4 µM_Y	Fitted Cycle: 35 GAL 62.4 µM_Y	Cycle: 36 GAL 124.8 µM_Y	Fitted Cycle: 36 GAL 124.8 µM_Y	Cycle: 37 GAL 250 µM_Y	Fitted Cycle: 37 GAL 250 µM_Y
-59.7	-1.7609	0	-0.109375	0	-0.167969	0	0.132813	0	0.0976563	0	0.21875	0
-59.6	0.0410147	0	-0.0839853	0	-0.111329	0	0.119141	0	0.130858	0	0.224608	0
-59.5	0.0449219	0	-0.0410156	0	-0.0761719	0	0.142578	0	0.146484	0	0.267578	0
-59.4	0.0566401	0	-0.0292974	0	-0.0644536	0	0.173828	0	0.158203	0	0.291015	0
-59.3	0.0566406	0	-0.0371094	0	-0.0644531	0	0.197266	0	0.158203	0	0.298828	0
-59.2	0.0664063	0	-0.0195313	0	-0.0742188	0	0.195313	0	0.148438	0	0.289063	0
-59.1	0.0761715	0	-0.00976598	0	-0.0839847	0	0.205078	0	0.158203	0	0.298828	0
-59	0.0683594	0	-0.00976563	0	-0.0839844	0	0.205078	0	0.146484	0	0.279297	0
-58.9	0.0781246	0	-3.57628e-07	0	-0.0664066	0	0.195312	0	0.148437	0	0.289062	0
-58.8	0.078125	0	-0.0078125	0	-0.0742188	0	0.195313	0	0.148438	0	0.28125	0
-58.7	0.0605469	0	-0.0136719	0	-0.0917969	0	0.189453	0	0.130859	0	0.263672	0
-58.6	0.066406	0	-0.0195315	0	-0.0859377	0	0.195313	0	0.117187	0	0.269531	0
-58.5	0.0664063	0	-0.0195313	0	-0.09375	0	0.183594	0	0.117188	0	0.269531	0
-58.4	0.0664063	0	-0.0195313	0	-0.105469	0	0.183594	0	0.109375	0	0.257813	0
-58.3	0.0507811	0	-0.0156251	0	-0.109375	0	0.167969	0	0.101562	0	0.253906	0
-58.2	0.0566406	0	-0.0214844	0	-0.115234	0	0.166016	0	0.107422	0	0.259766	0
-58.1	0.0488282	0	-0.0292968	0	-0.126953	0	0.154297	0	0.107422	0	0.248047	0
-58	0.046875	0	-0.0195313	0	-0.125	0	0.152344	0	0.105469	0	0.257813	0
-57.9	0.046875	0	-0.0195313	0	-0.136719	0	0.144531	0	0.105469	0	0.257813	0
-57.8	0.0410154	0	-0.0253909	0	-0.13086	0	0.138672	0	0.103515	0	0.255859	0
-57.7	0.0332031	0	-0.0253906	0	-0.138672	0	0.130859	0	0.103516	0	0.244141	0
-57.6	0.0390623	0	-0.0195315	0	-0.132813	0	0.136719	0	0.109375	0	0.25	0
-57.5	0.0273438	0	-0.0273438	0	-0.132813	0	0.136719	0	0.0976563	0	0.242188	0
-57.4	0.035156	0	-0.0195315	0	-0.125	0	0.132812	0	0.105469	0	0.238281	0
-57.3	0.027344	0	-0.0312498	0	-0.125	0	0.132813	0	0.0976565	0	0.238281	0
-57.2	0.0332031	0	-0.0253906	0	-0.130859	0	0.130859	0	0.103516	0	0.232422	0
-57.1	0.0429684	0	-0.0156254	0	-0.121094	0	0.140625	0	0.113281	0	0.234375	0
-57	0.03125	0	-0.0234375	0	-0.128906	0	0.128906	0	0.101563	0	0.234375	0
-56.9	0.0312502	0	-0.0234373	0	-0.140625	0	0.128906	0	0.101563	0	0.222656	0
-56.8	0.0292966	0	-0.0175784	0	-0.142578	0	0.126953	0	0.0996091	0	0.228515	0
-56.7	0.0332031	0	-0.0253906	0	-0.138672	0	0.130859	0	0.0917969	0	0.224609	0
-56.6	0.0390623	0	-0.0195315	0	-0.144531	0	0.136719	0	0.097656	0	0.21875	0
-56.5	0.0390625	0	-0.0195313	0	-0.15625	0	0.125	0	0.0976563	0	0.21875	0
-56.4	0.027344	0	-0.019531	0	-0.15625	0	0.113281	0	0.0859377	0	0.21875	0
-56.3	0.035156	0	-0.0234377	0	-0.15625	0	0.113281	0	0.0937498	0	0.21875	0
-56.2	0.0273438	0	-0.0234375	0	-0.167969	0	0.101563	0	0.0859375	0	0.207031	0
-56.1	0.039062	0	-0.0195317	0	-0.164063	0	0.105469	0	0.0976558	0	0.210937	0
-56	0.0273438	0	-0.0195313	0	-0.164063	0	0.105469	0	0.0859375	0	0.199219	0
-55.9	0.0332031	0	-0.0136719	0	-0.158203	0	0.0996094	0	0.0917969	0	0.193359	0
-55.8	0.0253905	0	-0.0214845	0	-0.154297	0	0.0957031	0	0.095703	0	0.197266	0
-55.7	0.0292969	0	-0.0175781	0	-0.162109	0	0.0878906	0	0.0917969	0	0.193359	0
-55.6	0.0292971	0	-0.0175779	0	-0.169922	0	0.0800784	0	0.0917971	0	0.19336	0
-55.5	0.0351563	0	-0.0195313	0	-0.175781	0	0.0742188	0	0.0976563	0	0.199219	0
-55.4	0.0332031	0	-0.0136719	0	-0.177734	0	0.0800781	0	0.0917969	0	0.205078	0
-55.3	0.0390623	0	-0.00781274	0	-0.171875	0	0.0859375	0	0.097656	0	0.199219	0
-55.2	0.03125	0	-0.015625	0	-0.167969	0	0.078125	0	0.101563	0	0.195313	0
-55.1	0.0351561	0	-0.0117189	0	-0.175781	0	0.0820313	0	0.105469	0	0.199219	0
-55	0.0351563	0	-0.0117188	0	-0.175781	0	0.0742188	0	0.0976563	0	0.1875	0
-54.9	0.0332026	0	-0.0136724	0	-0.169922	0	0.0800776	0	0.103515	0	0.193359	0
-54.8	0.0332034	0	-0.0136716	0	-0.18164	0	0.0683596	0	0.0917971	0	0.19336	0
-54.7	0.0273438	0	-0.0078125	0	-0.164063	0	0.0742188	0	0.0976563	0	0.191406	0
-54.6	0.0273438	0	-0.0195313	0	-0.164063	0	0.0742188	0	0.0898438	0	0.191406	0
-54.5	0.03125	0	-0.015625	0	-0.171875	0	0.0703125	0	0.09375	0	0.183594	0
-54.4	0.0273436	0	-0.0117189	0	-0.167969	0	0.0624999	0	0.0859374	0	0.1875	0
-54.3	0.0214844	0	-0.00585938	0	-0.169922	0	0.0683596	0	0.103516	0	0.193359	0
-54.2	0.015625	0	-0.0078125	0	-0.164063	0	0.0742188	0	0.0976563	0	0.179688	0
-54.1	0.0156251	0	-0.00781238	0	-0.164062	0	0.0664064	0	0.0976564	0	0.179688	0
-54	0.0195313	0	-0.015625	0	-0.160156	0	0.0703125	0	0.101563	0	0.183594	0
-53.9	0.0234376	0	-0.0117186	0	-0.15625	0	0.0625001	0	0.0937501	0	0.175781	0
-53.8	0.0292966	0	-0.00585961	0	-0.150391	0	0.0683594	0	0.0917966	0	0.18164	0
-53.7	0.0214844	0	-0.00585938	0	-0.162109	0	0.0683594	0	0.0917969	0	0.173828	0
-53.6	0.0332028	0	-0.00585973	0	-0.150391	0	0.0800782	0	0.103515	0	0.185547	0
-53.5	0.0371094	0	-0.00195313	0	-0.146484	0	0.0722656	0	0.0957031	0	0.189453	0
-53.4	0.0214847	0	-0.0136715	0	-0.15039	0	0.0683597	0	0.0917972	0	0.185547	0
-53.3	0.0312496	0	-0.00390661	0	-0.140625	0	0.0703125	0	0.101562	0	0.183593	0
-53.2	0.0234375	0	-0.00390625	0	-0.140625	0	0.0703125	0	0.09375	0	0.183594	0
-53.1	0.0332028	0	-0.00585973	0	-0.13086	0	0.0800781	0	0.103515	0	0.185547	0
-53	0.0332031	0	-0.00585938	0	-0.138672	0	0.0683594	0	0.0917969	0	0.185547	0
-52.9	0.0312496	0	-0.00390661	0	-0.140625	0	0.0781246	0	0.101562	0	0.183593	0
-52.8	0.0351563	0	5.96046e-08	0	-0.136719	0	0.074219	0	0.105469	0	0.1875	0
-52.7	0.0410156	0	-0.00585938	0	-0.138672	0	0.0683594	0	0.103516	0	0.193359	0
-52.6	0.0468748	0	-2.38419e-07	0	-0.144531	0	0.0664063	0	0.109375	0	0.199219	0
-52.5	0.046875	0	0	0	-0.144531	0	0.0546875	0	0.117188	0	0.199219	0
-52.4	0.046875	0	0	0	-0.15625	0	0.0546875	0	0.117188	0	0.191406	0
-52.3	0.0410159	0	0.00585961	0	-0.169922	0	0.0605469	0	0.111328	0	0.185547	0
-52.2	0.0410156	0	0.00585938	0	-0.169922	0	0.0605469	0	0.111328	0	0.173828	0
-52.1	0.0410154	0	0.00585914	0	-0.169922	0	0.0605466	0	0.111328	0	0.173828	0
-52	0.0351563	0	0.0078125	0	-0.175781	0	0.0546875	0	0.105469	0	0.167969	0
-51.9	0.0351565	0	0.00781274	0	-0.175781	0	0.0625002	0	0.105469	0	0.167969	0
-51.8	0.0332029	0	0.00585914	0	-0.169922	0	0.0605469	0	0.111328	0	0.173828	0
-51.7	0.0332031	0	0.00585938	0	-0.169922	0	0.0605469	0	0.103516	0	0.173828	0
-51.6	0.0273435	0	0.0117185	0	-0.164063	0	0.0546875	0	0.109375	0	0.167969	0
-51.5	0.0273438	0	0.0117188	0	-0.164063	0	0.0546875	0	0.109375	0	0.167969	0
-51.4	0.0273438	0	0.0117188	0	-0.164063	0	0.0546875	0	0.109375	0	0.179688	0
-51.3	0.0234376	0	0.0156251	0	-0.140625	0	0.0507815	0	0.113281	0	0.183594	0
-51.2	0.021484	0	0.0253903	0	-0.111328	0	0.0605465	0	0.123047	0	0.18164	0
-51.1	0.0273436	0	0.0195311	0	-0.105469	0	0.0664064	0	0.117187	0	0.1875	0
-51	0.0195313	0	0.0234375	0	-0.0820313	0	0.0585938	0	0.121094	0	0.191406	0
-50.9	0.0253906	0	0.0214844	0	-0.0761719	0	0.0644531	0	0.126953	0	0.189453	0
-50.8	0.0214843	0	0.0253905	0	-0.0722657	0	0.0683594	0	0.130859	0	0.201172	0
-50.7	0.0273438	0	0.03125	0	-0.0664063	0	0.0742188	0	0.136719	0	0.230469	0
-50.6	0.0332029	0	0.0253904	0	-0.0800784	0	0.0683594	0	0.142578	0	0.24414	0
-50.5	0.0332031	0	0.0253906	0	-0.0800781	0	0.0683594	0	0.142578	0	0.255859	0
-50.4	0.0253906	0	0.0292969	0	-0.0761719	0	0.0722656	0	0.146484	0	0.248047	0
-50.3	0.0175781	0	0.0292969	0	-0.0839844	0	0.0722656	0	0.146484	0	0.248047	0
-50.2	0.0175781	0	0.0214844	0	-0.0839844	0	0.0644531	0	0.138672	0	0.259766	0
-50.1	0.0175781	0	0.0214844	0	-0.0957031	0	0.0644531	0	0.138672	0	0.259766	0
-50	0.0117188	0	0.0273438	0	-0.0898438	0	0.0703125	0	0.144531	0	0.253906	0
-49.9	0.0214844	0	0.0253906	0	-0.0917969	0	0.0683594	0	0.142578	0	0.263672	0
-49.8	0.0214846	0	0.0253909	0	-0.0996091	0	0.0683596	0	0.142578	0	0.263672	0
-49.7	0.019531	0	0.0312498	0	-0.0937502	0	0.066406	0	0.148437	0	0.269531	0
-49.6	0.0234374	0	0.0351562	0	-0.0898438	0	0.0585939	0	0.152344	0	0.253906	0
-49.5	0.0273438	0	0.0390625	0	-0.0976563	0	0.0625	0	0.144531	0	0.246094	0
-49.4	0.0214844	0	0.0332031	0	-0.0996094	0	0.0683594	0	0.150391	0	0.244141	0
-49.3	0.0273435	0	0.0390623	0	-0.0937502	0	0.0742188	0	0.15625	0	0.25	0
-49.2	0.0273438	0	0.0390625	0	-0.105469	0	0.0664063	0	0.15625	0	0.238281	0
-49.1	0.0312498	0	0.0351561	0	-0.101563	0	0.0585938	0	0.160156	0	0.234375	0
-49	0.0234375	0	0.0351563	0	-0.101563	0	0.0585938	0	0.152344	0	0.222656	0
-48.9	0.0332031	0	0.0449219	0	-0.0917969	0	0.0683594	0	0.162109	0	0.232422	0
-48.8	0.033203	0	0.0449218	0	-0.091797	0	0.0605468	0	0.162109	0	0.244141	0
-48.7	0.0214841	0	0.0332029	0	-0.0917971	0	0.0488279	0	0.162109	0	0.251953	0
-48.6	0.0214847	0	0.0332035	0	-0.0917965	0	0.0488285	0	0.16211	0	0.244141	0
-48.5	0.0195313	0	0.0429688	0	-0.0820313	0	0.0585938	0	0.160156	0	0.242188	0
-48.4	0.0273438	0	0.0585938	0	-0.0664063	0	0.0742188	0	0.175781	0	0.257813	0
-48.3	0.0468745	0	0.0781245	0	-0.0468755	0	0.0937502	0	0.1875	0	0.269531	0
-48.2	0.0488282	0	0.0800782	0	-0.0644531	0	0.0957032	0	0.189453	0	0.271484	0
-48.1	0.0468753	0	0.0781253	0	-0.0742185	0	0.0937502	0	0.1875	0	0.269532	0
-48	0.0371094	0	0.0800781	0	-0.0839844	0	0.0957031	0	0.177734	0	0.259766	0
-47.9	0.0410156	0	0.0839844	0	-0.0917969	0	0.111328	0	0.181641	0	0.263672	0
-47.8	0.0371093	0	0.0800781	0	-0.0957032	0	0.0957029	0	0.177734	0	0.259766	0
-47.7	0.0312502	0	0.0859377	0	-0.101562	0	0.0703127	0	0.171875	0	0.253906	0
-47.6	0.0234374	0	0.0859374	0	-0.101563	0	0.0507811	0	0.171875	0	0.246094	0
-47.5	0.0117188	0	0.0859375	0	-0.109375	0	0.0585938	0	0.171875	0	0.246094	0
-47.4	0.00585938	0	0.0996094	0	-0.0957031	0	0.0722656	0	0.177734	0	0.248047	0
-47.3	-0.00390661	0	0.0976559	0	-0.0976566	0	0.0820313	0	0.1875	0	0.257812	0
-47.2	0.00195217	0	0.103515	0	-0.0917978	0	0.107421	0	0.18164	0	0.24414	0
-47.1	-0.0234367	0	0.0703133	0	-0.105468	0	0.0937499	0	0.13672	0	0.207032	0
-47	-0.03125	0	0.0625	0	-0.113281	0	0.0976563	0	0.117188	0	0.191406	0
-46.9	-0.0976563	0	0.00390625	0	-0.179688	0	0.0390625	0	0.0429688	0	0.125	0
-46.8	-0.228516	0	-0.126954	0	-0.302735	0	-0.0800836	0	-0.0996099	0	-0.0175786	0
-46.7	-0.376952	0	-0.275389	0	-0.439452	0	-0.220702	0	-0.248046	0	-0.166014	0
-46.6	-0.472653	0	-0.378903	0	-0.554685	0	-0.32422	0	-0.363278	0	-0.281247	0
-46.5	-0.505859	0	-0.423828	0	-0.599609	0	-0.349609	0	-0.416016	0	-0.326172	0
-46.4	-0.554688	0	-0.480469	0	-0.65625	0	-0.398438	0	-0.484375	0	-0.382813	0
-46.3	-0.583983	0	-0.529296	0	-0.705077	0	-0.435548	0	-0.533202	0	-0.43164	0
-46.2	-0.589844	0	-0.554688	0	-0.730469	0	-0.460938	0	-0.558594	0	-0.464844	0
-46.1	-0.605467	0	-0.585936	0	-0.76953	0	-0.480469	0	-0.605467	0	-0.503905	0
-46	-0.574219	0	-0.570313	0	-0.746094	0	-0.476563	0	-0.601563	0	-0.5	0
-45.9	-0.568359	0	-0.583984	0	-0.759766	0	-0.470703	0	-0.626953	0	-0.525391	0
-45.8	-0.552734	0	-0.599609	0	-0.755859	0	-0.47461	0	-0.654297	0	-0.541015	0
-45.7	-0.55664	0	-0.603515	0	-0.771483	0	-0.482421	0	-0.669921	0	-0.55664	0
-45.6	-0.527344	0	-0.585938	0	-0.75	0	-0.453125	0	-0.667969	0	-0.546875	0
-45.5	-0.517578	0	-0.595703	0	-0.759766	0	-0.451172	0	-0.677734	0	-0.556641	0
-45.4	-0.498047	0	-0.595703	0	-0.751953	0	-0.431641	0	-0.689453	0	-0.556641	0
-45.3	-0.474609	0	-0.591796	0	-0.748046	0	-0.408202	0	-0.685546	0	-0.552734	0
-45.2	-0.433595	0	-0.570313	0	-0.714845	0	-0.367188	0	-0.671876	0	-0.539063	0
-45.1	-0.408203	0	-0.552734	0	-0.720703	0	-0.330078	0	-0.677734	0	-0.52539	0
-45	-0.365234	0	-0.529297	0	-0.697266	0	-0.287109	0	-0.654297	0	-0.501953	0
-44.9	-0.318359	0	-0.505859	0	-0.681641	0	-0.259766	0	-0.646484	0	-0.494141	0
-44.8	-0.267576	0	-0.486326	0	-0.66992	0	-0.212888	0	-0.63867	0	-0.474607	0
-44.7	-0.154298	0	-0.419923	0	-0.587892	0	-0.107423	0	-0.564454	0	-0.400392	0
-44.6	-0.0605438	0	-0.349606	0	-0.505856	0	-0.0527289	0	-0.509763	0	-0.337888	0
-44.5	0.140625	0	-0.183594	0	-0.339844	0	0.109375	0	-0.355469	0	-0.195313	0
-44.4	0.302734	0	-0.0449219	0	-0.189453	0	0.240234	0	-0.228516	0	-0.0566406	0
-44.3	0.476557	0	0.128901	0	-0.0156302	0	0.406251	0	-0.074224	0	0.10937	0
-44.2	0.541014	0	0.185545	0	0.0410139	0	0.41992	0	-0.0292986	0	0.142576	0
-44.1	0.566406	0	0.218749	0	0.0546868	0	0.421875	0	-0.00390691	0	0.148437	0
-44	0.566406	0	0.230469	0	0.0664063	0	0.433594	0	-0.00390625	0	0.160156	0
-43.9	0.552734	0	0.232422	0	0.0488281	0	0.419922	0	0.00195313	0	0.173828	0
-43.8	0.58203	0	0.273437	0	0.0898428	0	0.460938	0	0.031249	0	0.203124	0
-43.7	0.597655	0	0.281249	0	0.0742177	0	0.445311	0	0.0468739	0	0.210936	0
-43.6	0.580079	0	0.244142	0	0.048829	0	0.376953	0	0.0214853	0	0.19336	0
-43.5	0.605469	0	0.238281	0	0.0429688	0	0.332031	0	0.0351563	0	0.207031	0
-43.4	0.613281	0	0.246094	0	0.03125	0	0.308594	0	0.0625	0	0.222656	0
-43.3	0.5625	0	0.265625	0	0.0624995	0	0.281251	0	0.0820308	0	0.253906	0
-43.2	0.537109	0	0.298828	0	0.103515	0	0.263672	0	0.126953	0	0.298828	0
-43.1	0.537108	0	0.38867	0	0.173827	0	0.302736	0	0.205077	0	0.369139	0
-43	0.503906	0	0.476563	0	0.261719	0	0.359375	0	0.3125	0	0.464844	0
-42.9	0.478516	0	0.541016	0	0.306641	0	0.423828	0	0.396484	0	0.560547	0
-42.8	0.499999	0	0.64453	0	0.410155	0	0.527348	0	0.492186	0	0.714842	0
-42.7	0.535152	0	0.749996	0	0.484371	0	0.632809	0	0.55859	0	0.820309	0
-42.6	0.537107	0	0.759763	0	0.486326	0	0.654296	0	0.556638	0	0.830076	0
-42.5	0.533203	0	0.705078	0	0.451172	0	0.580078	0	0.482422	0	0.775391	0
-42.4	0.472656	0	0.625	0	0.402344	0	0.480469	0	0.382813	0	0.65625	0
-42.3	0.417971	0	0.550783	0	0.335939	0	0.343749	0	0.246096	0	0.429689	0
-42.2	0.386719	0	0.492188	0	0.316406	0	0.234375	0	0.167969	0	0.1875	0
-42.1	0.316407	0	0.410157	0	0.253907	0	0.136719	0	0.0898445	0	-0.0195305	0
-42	0.267578	0	0.341797	0	0.154297	0	0.0644531	0	0.0292969	0	-0.220703	0
-41.9	0.222656	0	0.273438	0	0.0195313	0	-0.0195313	0	-0.0273438	0	-0.386719	0
-41.8	0.144532	0	0.187501	0	-0.0898432	0	-0.0703126	0	-0.0781244	0	-0.335937	0
-41.7	0.0781253	0	0.121094	0	-0.203125	0	-0.125	0	-0.132812	0	-0.289062	0
-41.6	0.0273437	0	0.0703124	0	-0.34375	0	-0.144531	0	-0.183594	0	-0.242188	0
-41.5	-0.0117188	0	0.03125	0	-0.433594	0	-0.164063	0	-0.191406	0	-0.21875	0
-41.4	-0.046875	0	0.00390625	0	-0.460938	0	-0.199219	0	-0.175781	0	-0.214844	0
-41.3	-0.0683588	0	-0.0449213	0	-0.451171	0	-0.220703	0	-0.197265	0	-0.205078	0
-41.2	-0.0878903	0	-0.083984	0	-0.380859	0	-0.228515	0	-0.208984	0	-0.185547	0
-41.1	-0.117188	0	-0.113281	0	-0.359375	0	-0.199219	0	-0.1875	0	-0.15625	0
-41	-0.144531	0	-0.160156	0	-0.335938	0	-0.1875	0	-0.164063	0	-0.132813	0
-40.9	-0.171875	0	-0.160156	0	-0.3125	0	-0.144531	0	-0.152344	0	-0.128906	0
-40.8	-0.160157	0	-0.136719	0	-0.308594	0	-0.140625	0	-0.148438	0	-0.117188	0
-40.7	-0.154297	0	-0.142578	0	-0.306641	0	-0.126953	0	-0.154297	0	-0.103516	0
-40.6	-0.138672	0	-0.134765	0	-0.298828	0	-0.130859	0	-0.146484	0	-0.107422	0
-40.5	-0.130859	0	-0.130859	0	-0.283203	0	-0.123047	0	-0.142578	0	-0.119141	0
-40.4	-0.126953	0	-0.134766	0	-0.291016	0	-0.130859	0	-0.166016	0	-0.126953	0
-40.3	-0.138671	0	-0.134765	0	-0.291015	0	-0.123047	0	-0.177734	0	-0.146484	0
-40.2	-0.142578	0	-0.15039	0	-0.287109	0	-0.134765	0	-0.18164	0	-0.15039	0
-40.1	-0.154297	0	-0.138672	0	-0.28711	0	-0.134766	0	-0.181641	0	-0.16211	0
-40	-0.158203	0	-0.142578	0	-0.291016	0	-0.138672	0	-0.185547	0	-0.166016	0
-39.9	-0.154297	0	-0.130859	0	-0.287109	0	-0.134766	0	-0.173828	0	-0.162109	0
-39.8	-0.154297	0	-0.138672	0	-0.287109	0	-0.126953	0	-0.173828	0	-0.162109	0
-39.7	-0.173828	0	-0.130859	0	-0.287109	0	-0.134765	0	-0.173828	0	-0.15039	0
-39.6	-0.15625	0	-0.132813	0	-0.28125	0	-0.128906	0	-0.167969	0	-0.144531	0
-39.5	-0.15625	0	-0.132813	0	-0.289063	0	-0.128906	0	-0.167969	0	-0.144531	0
-39.4	-0.152344	0	-0.128906	0	-0.277344	0	-0.125	0	-0.171875	0	-0.140625	0
-39.3	-0.138672	0	-0.115235	0	-0.279297	0	-0.119141	0	-0.166016	0	-0.146485	0
-39.2	-0.144531	0	-0.128906	0	-0.277344	0	-0.125	0	-0.171875	0	-0.152344	0
-39.1	-0.144531	0	-0.128906	0	-0.285156	0	-0.125	0	-0.171875	0	-0.152344	0
-39	-0.132813	0	-0.128906	0	-0.285156	0	-0.125	0	-0.171875	0	-0.152344	0
-38.9	-0.128906	0	-0.136719	0	-0.273438	0	-0.113281	0	-0.179688	0	-0.15625	0
-38.8	-0.123047	0	-0.13086	0	-0.267578	0	-0.107422	0	-0.173828	0	-0.150391	0
-38.7	-0.115234	0	-0.130859	0	-0.267578	0	-0.0957029	0	-0.173828	0	-0.15039	0
-38.6	-0.109375	0	-0.136719	0	-0.261719	0	-0.101563	0	-0.175781	0	-0.15625	0
-38.5	-0.0976563	0	-0.136719	0	-0.269531	0	-0.101563	0	-0.175781	0	-0.15625	0
-38.4	-0.0859375	0	-0.136719	0	-0.269531	0	-0.109375	0	-0.175781	0	-0.15625	0
-38.3	-0.0683597	0	-0.126953	0	-0.259766	0	-0.0996094	0	-0.177735	0	-0.154297	0
-38.2	-0.0742185	0	-0.132812	0	-0.265625	0	-0.105469	0	-0.183594	0	-0.160156	0
-38.1	-0.0742188	0	-0.140625	0	-0.265625	0	-0.105469	0	-0.183594	0	-0.160156	0
-38	-0.0742188	0	-0.140625	0	-0.277344	0	-0.105469	0	-0.195313	0	-0.160156	0
-37.9	-0.0820313	0	-0.140625	0	-0.277344	0	-0.105469	0	-0.195313	0	-0.160156	0
-37.8	-0.0742188	0	-0.140625	0	-0.277344	0	-0.105469	0	-0.183594	0	-0.160156	0
-37.7	-0.0781249	0	-0.15625	0	-0.28125	0	-0.109375	0	-0.1875	0	-0.164062	0
-37.6	-0.078125	0	-0.15625	0	-0.289063	0	-0.109375	0	-0.199219	0	-0.175781	0
-37.5	-0.078125	0	-0.15625	0	-0.28125	0	-0.109375	0	-0.199219	0	-0.175781	0
-37.4	-0.078125	0	-0.164063	0	-0.28125	0	-0.109375	0	-0.207031	0	-0.1875	0
-37.3	-0.0742189	0	-0.160156	0	-0.277344	0	-0.117188	0	-0.203125	0	-0.183594	0
-37.2	-0.078125	0	-0.164063	0	-0.28125	0	-0.109375	0	-0.21875	0	-0.195313	0
-37.1	-0.078125	0	-0.164063	0	-0.289063	0	-0.121094	0	-0.21875	0	-0.195313	0
-37	-0.078125	0	-0.164063	0	-0.289063	0	-0.121094	0	-0.21875	0	-0.195313	0
-36.9	-0.0722656	0	-0.169922	0	-0.283203	0	-0.123047	0	-0.220703	0	-0.189453	0
-36.8	-0.0722656	0	-0.169922	0	-0.283203	0	-0.115234	0	-0.220703	0	-0.189453	0
-36.7	-0.0722655	0	-0.169922	0	-0.294922	0	-0.123047	0	-0.220703	0	-0.189453	0
-36.6	-0.0683595	0	-0.166016	0	-0.279297	0	-0.119141	0	-0.216797	0	-0.185547	0
-36.5	-0.0683594	0	-0.166016	0	-0.291016	0	-0.119141	0	-0.216797	0	-0.197266	0
-36.4	-0.0527344	0	-0.162109	0	-0.287109	0	-0.115234	0	-0.224609	0	-0.193359	0
-36.3	-0.0468751	0	-0.164063	0	-0.28125	0	-0.109375	0	-0.21875	0	-0.1875	0
-36.2	-0.0292972	0	-0.154297	0	-0.271485	0	-0.0996097	0	-0.208985	0	-0.177735	0
-36.1	-0.0234375	0	-0.148438	0	-0.265625	0	-0.105469	0	-0.203125	0	-0.171875	0
-36	-0.0175781	0	-0.142578	0	-0.259766	0	-0.0996094	0	-0.197266	0	-0.166016	0
-35.9	0.00195313	0	-0.134766	0	-0.251953	0	-0.0917969	0	-0.197266	0	-0.158203	0
-35.8	0.0136714	0	-0.123047	0	-0.240235	0	-0.0800781	0	-0.185547	0	-0.154297	0
-35.7	0.017578	0	-0.119141	0	-0.236328	0	-0.076172	0	-0.19336	0	-0.150391	0
-35.6	0.0234374	0	-0.113281	0	-0.230469	0	-0.0703124	0	-0.1875	0	-0.144531	0
-35.5	0.03125	0	-0.105469	0	-0.222656	0	-0.0625	0	-0.179688	0	-0.136719	0
-35.4	0.0371094	0	-0.0996094	0	-0.216797	0	-0.0683594	0	-0.185547	0	-0.142578	0
-35.3	0.0429688	0	-0.09375	0	-0.210938	0	-0.0624998	0	-0.1875	0	-0.136719	0
-35.2	0.0605467	0	-0.0839846	0	-0.208985	0	-0.0527346	0	-0.177735	0	-0.126953	0
-35.1	0.0703121	0	-0.0742191	0	-0.199219	0	-0.0507813	0	-0.179688	0	-0.125	0
-35	0.0625	0	-0.0742188	0	-0.210938	0	-0.0507813	0	-0.1875	0	-0.125	0
-34.9	0.0761719	0	-0.0800781	0	-0.205078	0	-0.0449219	0	-0.181641	0	-0.119141	0
-34.8	0.0859371	0	-0.0703129	0	-0.195313	0	-0.0351563	0	-0.171875	0	-0.121094	0
-34.7	0.0917967	0	-0.0644533	0	-0.189453	0	-0.0410158	0	-0.177735	0	-0.115235	0
-34.6	0.095703	0	-0.060547	0	-0.185547	0	-0.0371094	0	-0.173828	0	-0.111328	0
-34.5	0.107422	0	-0.0605469	0	-0.185547	0	-0.0449219	0	-0.173828	0	-0.119141	0
-34.4	0.101563	0	-0.0625	0	-0.1875	0	-0.0390625	0	-0.175781	0	-0.113281	0
-34.3	0.109375	0	-0.0546876	0	-0.179688	0	-0.0312498	0	-0.179688	0	-0.117188	0
-34.2	0.115234	0	-0.0605469	0	-0.173828	0	-0.0253907	0	-0.173828	0	-0.111328	0
-34.1	0.125	0	-0.0507816	0	-0.175782	0	-0.015625	0	-0.164063	0	-0.101563	0
-34	0.125	0	-0.0507813	0	-0.164063	0	-0.015625	0	-0.171875	0	-0.101563	0
-33.9	0.123047	0	-0.0449219	0	-0.158203	0	-0.00976563	0	-0.177734	0	-0.0957031	0
-33.8	0.128906	0	-0.0390627	0	-0.164063	0	-0.015625	0	-0.171875	0	-0.089844	0
-33.7	0.117188	0	-0.0390623	0	-0.152344	0	-0.0156248	0	-0.171875	0	-0.0898435	0
-33.6	0.123047	0	-0.0332032	0	-0.158203	0	-0.00976548	0	-0.166016	0	-0.0839844	0
-33.5	0.123047	0	-0.0253906	0	-0.150391	0	-0.00976563	0	-0.158203	0	-0.0761719	0
-33.4	0.123047	0	-0.0253906	0	-0.150391	0	-0.0214844	0	-0.169922	0	-0.0761719	0
-33.3	0.117187	0	-0.0195315	0	-0.144531	0	-0.015625	0	-0.164063	0	-0.0703127	0
-33.2	0.117188	0	-0.0312498	0	-0.15625	0	-0.0156248	0	-0.164062	0	-0.0703123	0
-33.1	0.126953	0	-0.0214847	0	-0.146485	0	-0.00585938	0	-0.154297	0	-0.0605472	0
-33	0.119141	0	-0.0214844	0	-0.146484	0	-0.00585938	0	-0.154297	0	-0.0722656	0
-32.9	0.111328	0	-0.0175781	0	-0.142578	0	-0.00195313	0	-0.150391	0	-0.0683594	0
-32.8	0.117187	0	-0.011719	0	-0.144531	0	-0.00390625	0	-0.152344	0	-0.0625002	0
-32.7	0.117188	0	-0.0117185	0	-0.144531	0	-0.00390603	0	-0.152344	0	-0.0624998	0
-32.6	0.123047	0	-0.0058596	0	-0.138672	0	-0.00976563	0	-0.146485	0	-0.0566408	0
-32.5	0.123047	0	-0.0136719	0	-0.138672	0	-0.00976563	0	-0.158203	0	-0.0566406	0
-32.4	0.111328	0	-0.0136719	0	-0.138672	0	-0.00976563	0	-0.158203	0	-0.0566406	0
-32.3	0.124999	0	-5.21541e-07	0	-0.125001	0	-0.0078125	0	-0.144532	0	-0.0429693	0
-32.2	0.123047	0	0.0058593	0	-0.119141	0	-0.0019532	0	-0.146484	0	-0.0449219	0
-32.1	0.126953	0	0.0175782	0	-0.126953	0	-0.00585915	0	-0.142578	0	-0.0410156	0
-32	0.132813	0	0.015625	0	-0.121094	0	0	0	-0.136719	0	-0.0351563	0
-31.9	0.125	0	0.0273437	0	-0.117188	0	-0.0078125	0	-0.132813	0	-0.0312501	0
-31.8	0.125	0	0.0273438	0	-0.117188	0	-0.0078125	0	-0.132813	0	-0.03125	0
-31.7	0.117188	0	0.0273439	0	-0.125	0	-0.0156249	0	-0.132812	0	-0.0312499	0
-31.6	0.117187	0	0.0390622	0	-0.105469	0	0.00390618	0	-0.132813	0	-0.0195315	0
-31.5	0.132812	0	0.0429687	0	-0.101563	0	0	0	-0.128906	0	-0.0156251	0
-31.4	0.121094	0	0.0429688	0	-0.109375	0	0	0	-0.128906	0	-0.015625	0
-31.3	0.121094	0	0.0429688	0	-0.109375	0	0	0	-0.136719	0	-0.015625	0
-31.2	0.121094	0	0.0429689	0	-0.109375	0	1.11759e-07	0	-0.136719	0	-0.0273436	0
-31.1	0.132812	0	0.0546871	0	-0.109375	0	-2.23517e-07	0	-0.125	0	-0.0156254	0
-31	0.136719	0	0.0585937	0	-0.105469	0	0.00390625	0	-0.121094	0	-0.0117188	0
-30.9	0.128906	0	0.0507813	0	-0.113281	0	0.00390632	0	-0.121094	0	-0.0117187	0
-30.8	0.138672	0	0.0605467	0	-0.103516	0	0.00585938	0	-0.111328	0	-0.00195331	0
-30.7	0.126953	0	0.060547	0	-0.115234	0	0.00585949	0	-0.123047	0	-0.00976551	0
-30.6	0.136718	0	0.0585934	0	-0.105469	0	0.00390606	0	-0.113282	0	-3.72529e-07	0
-30.5	0.136719	0	0.0585938	0	-0.105469	0	0.00390625	0	-0.113281	0	0	0
-30.4	0.125	0	0.0585938	0	-0.117187	0	0.00390632	0	-0.113281	0	7.45058e-08	0
-30.3	0.134766	0	0.0683593	0	-0.107422	0	0.00585949	0	-0.103516	0	0.00976555	0
-30.2	0.132812	0	0.0664061	0	-0.101563	0	0.0117186	0	-0.105469	0	0.00390614	0
-30.1	0.132813	0	0.0664063	0	-0.109375	0	0	0	-0.105469	0	0.00390625	0
-30	0.132813	0	0.0664063	0	-0.109375	0	7.45058e-08	0	-0.105469	0	0.00390632	0
-29.9	0.140625	0	0.0742187	0	-0.101563	0	0.00781261	0	-0.0976563	0	0.0117187	0
-29.8	0.146484	0	0.0683593	0	-0.115234	0	0.0136719	0	-0.091797	0	0.017578	0
-29.7	0.140625	0	0.0742188	0	-0.109375	0	0.0195313	0	-0.0859375	0	0.0234375	0
-29.6	0.138672	0	0.0800781	0	-0.103516	0	0.0253907	0	-0.0800782	0	0.0292968	0
-29.5	0.142578	0	0.0839843	0	-0.0996094	0	0.0292969	0	-0.0878907	0	0.0332031	0
-29.4	0.142578	0	0.0839845	0	-0.0996093	0	0.029297	0	-0.0878905	0	0.0332032	0
-29.3	0.140625	0	0.0937498	0	-0.101563	0	0.0390625	0	-0.0781252	0	0.0429686	0
-29.2	0.140625	0	0.0859375	0	-0.101563	0	0.0390625	0	-0.078125	0	0.0429688	0
-29.1	0.146484	0	0.0917968	0	-0.0957032	0	0.0449219	0	-0.0722657	0	0.0488281	0
-29	0.150391	0	0.0957031	0	-0.0917969	0	0.0488281	0	-0.0683594	0	0.0527343	0
-28.9	0.142578	0	0.0957032	0	-0.0917968	0	0.0488282	0	-0.0683593	0	0.0527345	0
-28.8	0.148437	0	0.0898436	0	-0.0859376	0	0.0546875	0	-0.0625001	0	0.0507811	0
-28.7	0.154297	0	0.0957031	0	-0.0800782	0	0.0605468	0	-0.0566407	0	0.0566406	0
-28.6	0.162109	0	0.103516	0	-0.0722657	0	0.0683594	0	-0.0488282	0	0.0527343	0
-28.5	0.15625	0	0.109375	0	-0.0664064	0	0.0742188	0	-0.0429689	0	0.0585936	0
-28.4	0.15625	0	0.109375	0	-0.0742186	0	0.0742189	0	-0.0429686	0	0.0585939	0
-28.3	0.173828	0	0.115234	0	-0.0683594	0	0.0800782	0	-0.0371094	0	0.0644531	0
-28.2	0.183594	0	0.125	0	-0.0585939	0	0.0898436	0	-0.0390627	0	0.0742186	0
-28.1	0.183594	0	0.117188	0	-0.0585935	0	0.089844	0	-0.0390623	0	0.074219	0
-28	0.189453	0	0.123047	0	-0.0527345	0	0.0839844	0	-0.0410157	0	0.0683593	0
-27.9	0.181641	0	0.126953	0	-0.0488281	0	0.0878906	0	-0.0371094	0	0.0722656	0
-27.8	0.191406	0	0.136718	0	-0.0390629	0	0.0976563	0	-0.0273441	0	0.0820309	0
-27.7	0.191406	0	0.125	0	-0.0390625	0	0.0976563	0	-0.0273438	0	0.0742188	0
-27.6	0.197265	0	0.130859	0	-0.0332033	0	0.0957031	0	-0.0214846	0	0.0800779	0
-27.5	0.201172	0	0.134766	0	-0.0292969	0	0.0996094	0	-0.0175781	0	0.0839844	0
-27.4	0.205078	0	0.126953	0	-0.0371093	0	0.103516	0	-0.0253906	0	0.0878907	0
-27.3	0.208984	0	0.138671	0	-0.0136723	0	0.115234	0	-0.0136723	0	0.0996089	0
-27.2	0.208984	0	0.130859	0	-0.0136719	0	0.115234	0	-0.0136719	0	0.0996094	0
-27.1	0.21875	0	0.140625	0	-0.00390662	0	0.125	0	-0.00390662	0	0.0976559	0
-27	0.222656	0	0.144531	0	0	0	0.117188	0	0	0	0.101563	0
-26.9	0.216797	0	0.15039	0	-0.0058596	0	0.134765	0	0.00585915	0	0.107422	0
-26.8	0.216797	0	0.150391	0	-0.00585915	0	0.134766	0	0.0058596	0	0.0996096	0
-26.7	0.228516	0	0.162109	0	0.00585938	0	0.134766	0	0.0175781	0	0.111328	0
-26.6	0.224609	0	0.158203	0	0.0136716	0	0.142578	0	0.0175778	0	0.11914	0
-26.5	0.224609	0	0.158203	0	0.0136719	0	0.142578	0	0.0175781	0	0.119141	0
-26.4	0.230469	0	0.164062	0	0.0117187	0	0.148437	0	0.0234374	0	0.125	0
-26.3	0.232422	0	0.166015	0	0.0214842	0	0.158203	0	0.033203	0	0.123047	0
-26.2	0.238281	0	0.160156	0	0.0273438	0	0.15625	0	0.0390625	0	0.128906	0
-26.1	0.242188	0	0.164063	0	0.03125	0	0.160156	0	0.03125	0	0.132813	0
-26	0.234375	0	0.167969	0	0.0351563	0	0.164063	0	0.0351563	0	0.136719	0
-25.9	0.238281	0	0.171875	0	0.0468746	0	0.175781	0	0.0468746	0	0.148437	0
-25.8	0.238281	0	0.171875	0	0.0351564	0	0.175781	0	0.0468751	0	0.140625	0
-25.7	0.242188	0	0.175781	0	0.0390625	0	0.179688	0	0.0507813	0	0.144531	0
-25.6	0.248047	0	0.18164	0	0.0449217	0	0.185547	0	0.0566404	0	0.138672	0
-25.5	0.251953	0	0.185547	0	0.0488281	0	0.177734	0	0.0527344	0	0.142578	0
-25.4	0.246094	0	0.179687	0	0.0546874	0	0.183594	0	0.0585937	0	0.148437	0
-25.3	0.255859	0	0.189453	0	0.0644528	0	0.193359	0	0.0566403	0	0.158203	0
-25.2	0.255859	0	0.189453	0	0.0644531	0	0.193359	0	0.0566406	0	0.158203	0
-25.1	0.248047	0	0.189453	0	0.0644531	0	0.185547	0	0.0566406	0	0.150391	0
-25	0.253906	0	0.195313	0	0.0703125	0	0.191406	0	0.0625	0	0.15625	0
-24.9	0.248047	0	0.189453	0	0.0761717	0	0.197265	0	0.0683592	0	0.162109	0
-24.8	0.248047	0	0.189453	0	0.0644531	0	0.185547	0	0.0683594	0	0.150391	0
-24.7	0.251953	0	0.193359	0	0.0683594	0	0.189453	0	0.0722656	0	0.154297	0
-24.6	0.251953	0	0.185547	0	0.0683595	0	0.189453	0	0.0722658	0	0.154297	0
-24.5	0.248047	0	0.189453	0	0.0722656	0	0.181641	0	0.0761719	0	0.158203	0
-24.4	0.248047	0	0.177734	0	0.0644531	0	0.181641	0	0.0761719	0	0.146484	0
-24.3	0.242188	0	0.183594	0	0.078125	0	0.179688	0	0.0820313	0	0.152344	0
-24.2	0.248047	0	0.189453	0	0.0839844	0	0.185547	0	0.0878906	0	0.158203	0
-24.1	0.248047	0	0.189453	0	0.0839844	0	0.173828	0	0.0878906	0	0.150391	0
-24	0.251953	0	0.193359	0	0.0996094	0	0.177734	0	0.0917969	0	0.154297	0
-23.9	0.251953	0	0.193359	0	0.0996094	0	0.169922	0	0.0917969	0	0.154297	0
-23.8	0.251953	0	0.193359	0	0.0996094	0	0.169922	0	0.0917969	0	0.154297	0
-23.7	0.251953	0	0.193359	0	0.0996094	0	0.169922	0	0.0917969	0	0.142578	0
-23.6	0.240234	0	0.193359	0	0.0996094	0	0.169922	0	0.0800781	0	0.134766	0
-23.5	0.246094	0	0.199219	0	0.105469	0	0.175781	0	0.0859375	0	0.140625	0
-23.4	0.240235	0	0.185547	0	0.0996097	0	0.158203	0	0.0800785	0	0.134766	0
-23.3	0.24414	0	0.189453	0	0.115234	0	0.162109	0	0.0839842	0	0.138672	0
-23.2	0.244141	0	0.189453	0	0.115234	0	0.154297	0	0.0839844	0	0.138672	0
-23.1	0.236328	0	0.189453	0	0.115235	0	0.154297	0	0.0839846	0	0.126953	0
-23	0.242188	0	0.195313	0	0.109375	0	0.160156	0	0.101563	0	0.132813	0
-22.9	0.242188	0	0.195313	0	0.109375	0	0.160156	0	0.101563	0	0.132813	0
-22.8	0.248047	0	0.201172	0	0.115234	0	0.166016	0	0.107422	0	0.138672	0
-22.7	0.248047	0	0.201172	0	0.115234	0	0.166016	0	0.107422	0	0.150391	0
-22.6	0.248047	0	0.201172	0	0.115234	0	0.166015	0	0.107422	0	0.15039	0
-22.5	0.246094	0	0.199219	0	0.113281	0	0.164063	0	0.105469	0	0.148438	0
-22.4	0.251953	0	0.205078	0	0.11914	0	0.158203	0	0.123046	0	0.154296	0
-22.3	0.242188	0	0.195313	0	0.109375	0	0.148437	0	0.113281	0	0.132813	0
-22.2	0.226563	0	0.179688	0	0.105469	0	0.132813	0	0.0976563	0	0.117188	0
-22.1	0.222656	0	0.175781	0	0.101563	0	0.128906	0	0.0937501	0	0.113281	0
-22	0.21875	0	0.171875	0	0.0976563	0	0.125	0	0.0976563	0	0.109375	0
-21.9	0.207031	0	0.167969	0	0.0859376	0	0.113281	0	0.0859376	0	0.109375	0
-21.8	0.197266	0	0.158203	0	0.0839847	0	0.103516	0	0.0761722	0	0.0996097	0
-21.7	0.193359	0	0.154297	0	0.0722656	0	0.0996094	0	0.0722656	0	0.0957031	0
-21.6	0.177735	0	0.138672	0	0.0644535	0	0.0839841	0	0.056641	0	0.0800785	0
-21.5	0.171875	0	0.144531	0	0.0507813	0	0.0898438	0	0.0625	0	0.0742188	0
-21.4	0.16211	0	0.134766	0	0.0488283	0	0.0800783	0	0.060547	0	0.0644533	0
-21.3	0.160156	0	0.125	0	0.0390627	0	0.0703124	0	0.0507815	0	0.0546877	0
-21.2	0.15625	0	0.121094	0	0.0273438	0	0.0664063	0	0.046875	0	0.0507813	0
-21.1	0.144532	0	0.109375	0	0.0234378	0	0.0624999	0	0.0468753	0	0.0390628	0
-21	0.136719	0	0.101563	0	0.015625	0	0.0546875	0	0.0390625	0	0.03125	0
-20.9	0.142578	0	0.0957033	0	0.00976585	0	0.0488283	0	0.0410158	0	0.0332033	0
-20.8	0.136719	0	0.0976565	0	0.0156252	0	0.0546875	0	0.0468752	0	0.027344	0
-20.7	0.136719	0	0.0976563	0	0.015625	0	0.0546875	0	0.046875	0	0.0273438	0
-20.6	0.134766	0	0.0957036	0	0.00195365	0	0.0410156	0	0.0332036	0	0.0136724	0
-20.5	0.128906	0	0.0898438	0	-0.00390625	0	0.0351563	0	0.0390625	0	0.0195313	0
-20.4	0.113282	0	0.0859379	0	-0.0117183	0	0.0195317	0	0.0312504	0	0.0039067	0
-20.3	0.117188	0	0.0820314	0	-0.0156249	0	0.015625	0	0.0390626	0	1.49012e-07	0
-20.2	0.107422	0	0.0722656	0	-0.0253906	0	0.00585938	0	0.0371094	0	-0.00976563	0
-20.1	0.0917975	0	0.0566412	0	-0.0292963	0	-0.00195313	0	0.021485	0	-0.02539	0
-20	0.0859375	0	0.0507813	0	-0.0351563	0	-0.0078125	0	0.0273438	0	-0.03125	0
-19.9	0.0820312	0	0.0546874	0	-0.0390626	0	-7.45058e-08	0	0.0234374	0	-0.0273438	0
-19.8	0.0781252	0	0.0390627	0	-0.0546873	0	-0.0156254	0	0.0156252	0	-0.0312498	0
-19.7	0.0625	0	0.0351563	0	-0.0625	0	-0.0234375	0	0.0117188	0	-0.046875	0
-19.6	0.0527346	0	0.0332033	0	-0.0722654	0	-0.0332033	0	0.00195335	0	-0.0449217	0
-19.5	0.0566406	0	0.0292969	0	-0.0761719	0	-0.0371094	0	0.00585938	0	-0.0410156	0
-19.4	0.0410161	0	0.0253911	0	-0.0800777	0	-0.0410152	0	0.00195357	0	-0.0566402	0
-19.3	0.0312501	0	0.0156251	0	-0.0898436	0	-0.0390627	0	0.0039064	0	-0.0546874	0
-19.2	0.0273438	0	0	0	-0.0976563	0	-0.0546875	0	-0.00390625	0	-0.0625	0
-19.1	0.0273436	0	0.00781235	0	-0.0859376	0	-0.0468751	0	-0.0039064	0	-0.0507814	0
-19	0.0214844	0	0.00585938	0	-0.0996094	0	-0.0605469	0	-0.00585938	0	-0.0566406	0
-18.9	0.00976585	0	-0.00585915	0	-0.0996092	0	-0.0605467	0	-0.0097654	0	-0.0566404	0
-18.8	0.0117191	0	-0.00390588	0	-0.101562	0	-0.0703125	0	-0.00781213	0	-0.0585934	0
-18.7	0.0136719	0	-0.00976563	0	-0.0957031	0	-0.0683594	0	-0.0136719	0	-0.0527344	0
-18.6	5.21541e-07	0	-0.0156245	0	-0.109374	0	-0.0703125	0	-0.0195307	0	-0.054687	0
-18.5	-0.00390625	0	-0.0195313	0	-0.105469	0	-0.0742188	0	-0.0234375	0	-0.0507813	0
-18.4	-0.0097654	0	-0.0136717	0	-0.111328	0	-0.0722654	0	-0.0175779	0	-0.0449217	0
-18.3	-0.0136717	0	-0.017578	0	-0.115234	0	-0.0761719	0	-0.0136717	0	-0.0410155	0
-18.2	-0.00195313	0	-0.0175781	0	-0.115234	0	-0.0644531	0	-0.00195313	0	-0.0292969	0
-18.1	0.00390625	0	-0.015625	0	-0.109375	0	-0.058594	0	0.00390625	0	-0.0351563	0
-18	-0.00195313	0	-0.0214844	0	-0.115234	0	-0.0566406	0	0.00585938	0	-0.0332031	0
-17.9	-0.0117184	0	-0.0312496	0	-0.125	0	-0.0664059	0	0.00781287	0	-0.0312496	0
-17.8	-0.0117188	0	-0.0195313	0	-0.117188	0	-0.0546875	0	0.015625	0	-0.03125	0
-17.7	-0.0078125	0	-0.0234375	0	-0.109375	0	-0.0585938	0	0.0117188	0	-0.015625	0
-17.6	-0.0078125	0	-0.015625	0	-0.0976563	0	-0.0507813	0	0.0234375	0	-0.015625	0
-17.5	-0.0136719	0	-0.0214844	0	-0.0957031	0	-0.0566406	0	0.0175781	0	-0.0214844	0
-17.4	-0.0136719	0	-0.00976563	0	-0.0839844	0	-0.0449219	0	0.0175781	0	-0.00976563	0
-17.3	-0.017578	0	-0.0136717	0	-0.080078	0	-0.0488281	0	0.013672	0	-0.0136717	0
-17.2	-0.0253906	0	-0.00585938	0	-0.0800781	0	-0.0410156	0	0.0214844	0	-0.0136719	0
-17.1	-0.0175783	0	0.00585915	0	-0.0800783	0	-0.0292971	0	0.0214842	0	-0.0058596	0
-17	-0.0234375	0	0	0	-0.0742188	0	-0.0351563	0	0.0273438	0	-0.0117188	0
-16.9	-0.0234375	0	0	0	-0.0742188	0	-0.0351563	0	0.0273438	0	-0.0117188	0
-16.8	-0.0273438	0	-0.00390632	0	-0.0703126	0	-0.0312502	0	0.0234374	0	-0.00390632	0
-16.7	-0.0332031	0	0.00195313	0	-0.0761719	0	-0.0371094	0	0.0175781	0	-0.00976563	0
-16.6	-0.0390623	0	-0.00390603	0	-0.0703123	0	-0.03125	0	0.011719	0	-0.00781228	0
-16.5	-0.0390625	0	0.00390625	0	-0.0703125	0	-0.03125	0	0.0117188	0	0.00390625	0
-16.4	-0.0390625	0	0.00390625	0	-0.0703125	0	-0.03125	0	0.0234375	0	0.00390625	0
-16.3	-0.0390625	0	0.00390625	0	-0.0507813	0	-0.03125	0	0.0234375	0	0.00390625	0
-16.2	-0.0449219	0	-0.00195313	0	-0.0566406	0	-0.0371094	0	0.0175781	0	-0.00195313	0
-16.1	-0.0449219	0	0.00976563	0	-0.0449219	0	-0.0371094	0	0.0175781	0	0.00585938	0
-16	-0.0332031	0	0.00976563	0	-0.0371094	0	-0.0371094	0	0.0175781	0	0.00585938	0
-15.9	-0.0371092	0	0.00585952	0	-0.0410155	0	-0.0410155	0	0.0214845	0	0.00195327	0
-15.8	-0.0371094	0	0.00585938	0	-0.0292969	0	-0.0292969	0	0.0214844	0	0.00195313	0
-15.7	-0.0371094	0	0.0136719	0	-0.0410156	0	-0.0292969	0	0.0214844	0	0.00195313	0
-15.6	-0.0371094	0	0.0136719	0	-0.0292969	0	-0.0214844	0	0.0214844	0	0.00195313	0
-15.5	-0.03125	0	0.0195313	0	-0.0234375	0	-0.015625	0	0.0273438	0	0.0078125	0
-15.4	-0.0371094	0	0.0136719	0	-0.0292969	0	-0.0214844	0	0.0332031	0	0.00195313	0
-15.3	-0.0429685	0	0.00781272	0	-0.035156	0	-0.0273438	0	0.0351565	0	-0.00390603	0
-15.2	-0.0429688	0	0.0078125	0	-0.0273438	0	-0.0273438	0	0.0351563	0	0.0078125	0
-15.1	-0.0429688	0	0.0078125	0	-0.0273438	0	-0.0273438	0	0.0351563	0	0.0078125	0
-15	-0.0546875	0	0.0078125	0	-0.0273438	0	-0.015625	0	0.0351563	0	0.0078125	0
-14.9	-0.0527343	0	0.0097657	0	-0.0253906	0	-0.0136718	0	0.0371094	0	0.0097657	0
-14.8	-0.0488283	0	0.0136717	0	-0.0214845	0	-0.00976563	0	0.0410155	0	0.0136717	0
-14.7	-0.0488281	0	0.0136719	0	-0.0214844	0	-0.00976563	0	0.0410156	0	0.0136719	0
-14.6	-0.0488283	0	0.0136717	0	-0.00976577	0	-0.00195327	0	0.0410155	0	0.0136717	0
-14.5	-0.0527344	0	0.00976563	0	-0.0136719	0	-0.00585938	0	0.0371094	0	0.0214844	0
-14.4	-0.0527344	0	0.00976563	0	-0.0136719	0	-0.00585938	0	0.0371094	0	0.0214844	0
-14.3	-0.0527344	0	0.00976563	0	-0.0136719	0	-0.00585938	0	0.0371094	0	0.0214844	0
-14.2	-0.0527344	0	0.00976563	0	-0.0136719	0	-0.00585938	0	0.0371094	0	0.0214844	0
-14.1	-0.0527346	0	0.0097654	0	-0.0058596	0	-0.0058596	0	0.0371092	0	0.0097654	0
-14	-0.0585938	0	0.00390625	0	-0.0195313	0	-0.0117188	0	0.03125	0	0.00390625	0
-13.9	-0.0585938	0	-0.00390625	0	-0.0195313	0	-0.0117188	0	0.03125	0	0.00390625	0
-13.8	-0.0527346	0	0.0019529	0	-0.0136721	0	-0.00585938	0	0.0292967	0	0.0097654	0
-13.7	-0.0527344	0	0.00195313	0	-0.00585938	0	-0.00585938	0	0.0292969	0	0.00976563	0
-13.6	-0.0429691	0	0.0117184	0	0.00390588	0	0.00390625	0	0.0390621	0	0.0195309	0
-13.5	-0.0429688	0	0	0	0.00390625	0	-0.00390625	0	0.0390625	0	0.0195313	0
-13.4	-0.0429688	0	0.0117188	0	-0.00390625	0	-0.00390625	0	0.046875	0	0.0195313	0
-13.3	-0.0429688	0	0.0117188	0	-0.00390625	0	0.00390625	0	0.0390625	0	0.0195313	0
-13.2	-0.0429688	0	0	0	-0.00390625	0	0.00390625	0	0.0390625	0	0.0195313	0
-13.1	-0.0371096	0	0.00585915	0	0.0019529	0	0.00976563	0	0.0332029	0	0.0136717	0
-13	-0.0371094	0	0.00585938	0	0.00195313	0	0.00976563	0	0.0332031	0	0.0136719	0
-12.9	-0.0371096	0	0.00585915	0	0.0019529	0	0.0019529	0	0.0332029	0	0.0136717	0
-12.8	-0.0429685	0	2.23517e-07	0	-0.00390603	0	-0.00390625	0	0.0195315	0	0.00781272	0
-12.7	-0.046875	0	-0.00390625	0	0	0	-0.0117188	0	0.0234375	0	0.0117188	0
-12.6	-0.046875	0	-0.00390625	0	0	0	-0.0117188	0	0.0117188	0	0.0117188	0
-12.5	-0.046875	0	-0.015625	0	0	0	-0.0117188	0	0.0117188	0	0.00390625	0
-12.4	-0.046875	0	-0.015625	0	-0.0117188	0	-0.0117188	0	0.0117188	0	0.00390625	0
-12.3	-0.0410158	0	-0.00976585	0	-0.0058596	0	-0.00585938	0	0.0175779	0	0.0097654	0
-12.2	-0.0527344	0	-0.00976563	0	-0.00585938	0	-0.00585938	0	0.00585938	0	0.00976563	0
-12.1	-0.0410158	0	-0.00976585	0	-0.0058596	0	-0.0058596	0	0.00585915	0	0.0097654	0
-12	-0.0429688	0	-0.0117188	0	-0.0078125	0	-0.0078125	0	-0.00390625	0	-0.00390625	0
-11.9	-0.0371096	0	-0.0058596	0	-0.00976585	0	-0.00976585	0	0.0097654	0	0.0019529	0
-11.8	-0.0371094	0	-0.00585938	0	-0.00976563	0	-0.00976563	0	0.00976563	0	-0.00585938	0
-11.7	-0.03125	0	-0.0117188	0	-0.00390625	0	-0.00390625	0	0.0078125	0	0	0
-11.6	-0.03125	0	-0.0117188	0	0.00390625	0	-0.015625	0	0.0078125	0	0	0
-11.5	-0.03125	0	-0.0195313	0	-0.00390625	0	-0.015625	0	-0.00390625	0	0	0
-11.4	-0.0371096	0	-0.0136721	0	0.0019529	0	-0.00976585	0	0.0019529	0	0.00585915	0
-11.3	-0.0253906	0	-0.0136719	0	0.00195313	0	-0.0214844	0	0.00195313	0	0.00585938	0
-11.2	-0.0253906	0	-0.0136719	0	-0.00976563	0	-0.0292969	0	-0.00585938	0	0.00585938	0
-11.1	-0.0273437	0	-0.0273437	0	-0.0117187	0	-0.03125	0	-0.00781243	0	0.00390632	0
-11	-0.0273438	0	-0.0273438	0	-0.0117188	0	-0.03125	0	-0.0195313	0	-0.0078125	0
-10.9	-0.0273435	0	-0.0273435	0	-0.0117185	0	-0.0312498	0	-0.019531	0	-0.00781228	0
-10.8	-0.0214846	0	-0.0214846	0	-0.0058596	0	-0.0253906	0	-0.0136721	0	-0.00195335	0
-10.7	-0.0214844	0	-0.0214844	0	-0.0136719	0	-0.0253906	0	-0.0136719	0	-0.00195313	0
-10.6	-0.0156252	0	-0.0156252	0	-0.00781272	0	-0.0195313	0	-0.00781272	0	0.00390603	0
-10.5	-0.0117188	0	-0.0195313	0	-0.015625	0	-0.015625	0	-0.0117188	0	0.0078125	0
-10.4	-0.0117188	0	-0.0195313	0	-0.015625	0	-0.015625	0	-0.0117188	0	0.0078125	0
-10.3	-0.00390625	0	-0.0195313	0	-0.015625	0	-0.015625	0	-0.0117188	0	0	0
-10.2	0.00195313	0	-0.0253906	0	0.00195313	0	-0.00976563	0	-0.0175781	0	0.00585938	0
-10.1	0.00195313	0	-0.0253906	0	-0.00976563	0	-0.00976563	0	-0.0175781	0	0.00585938	0
-10	0.00195313	0	-0.0253906	0	-0.00976563	0	-0.00976563	0	-0.0175781	0	-0.00585938	0
-9.9	2.98023e-07	0	-0.0273435	0	2.98023e-07	0	-0.0117185	0	-0.019531	0	-0.0078122	0
-9.8	0.00585915	0	-0.0292971	0	-0.0058596	0	-0.00585938	0	-0.0253908	0	-0.00195335	0
-9.7	0.0117188	0	-0.0234375	0	0	0	-0.0117188	0	-0.0195313	0	-0.00390625	0
-9.6	0.0117188	0	-0.0234375	0	0	0	-0.0117188	0	-0.0195313	0	-0.00390625	0
-9.5	0.015625	0	-0.0195313	0	0.00390625	0	-0.0078125	0	-0.0234375	0	0	0
-9.4	0.0078125	0	-0.03125	0	0.00390625	0	-0.015625	0	-0.0234375	0	-0.0117188	0
-9.3	0.015625	0	-0.0195313	0	0.00390625	0	-0.015625	0	-0.0234375	0	-0.0117188	0
-9.2	0.0078125	0	-0.0195313	0	-0.0078125	0	-0.015625	0	-0.0234375	0	-0.0234375	0
-9.1	0.00781272	0	-0.019531	0	-0.00781228	0	-0.0156248	0	-0.035156	0	-0.0234373	0
-9	0.0273438	0	-0.0078125	0	0.00390625	0	-0.00390625	0	-0.0234375	0	-0.0117188	0
-8.9	0.0273438	0	-0.0078125	0	0.00390625	0	-0.00390625	0	-0.0234375	0	-0.0195313	0
-8.8	0.0195314	0	-0.0195311	0	-0.0039061	0	-0.0156249	0	-0.0234374	0	-0.0195311	0
-8.7	0.0234375	0	-0.015625	0	0	0	-0.0117188	0	-0.0195313	0	-0.015625	0
-8.6	0.0195315	0	-0.019531	0	-0.00390595	0	-0.0156249	0	-0.0312497	0	-0.019531	0
-8.5	0.0292969	0	-0.00976563	0	0.00585938	0	-0.00585938	0	-0.0214844	0	-0.0214844	0
-8.4	0.0292971	0	-0.0097654	0	-0.00585915	0	-0.00585915	0	-0.0332029	0	-0.0214842	0
-8.3	0.0234374	0	-0.00390632	0	-7.45058e-08	0	1.49012e-07	0	-0.0273438	0	-0.0156251	0
-8.2	0.03125	0	0.00390625	0	0	0	0.0078125	0	-0.0195313	0	-0.0078125	0
-8.1	0.03125	0	-0.00390625	0	0	0	0.0078125	0	-0.0195313	0	-0.0078125	0
-8	0.0371094	0	0.00195313	0	0.00585938	0	0.0136719	0	-0.0214844	0	-0.00195313	0
-7.9	0.0429683	0	0.00781205	0	0.0117183	0	0.0195308	0	-0.0156254	0	-0.0039067	0
-7.8	0.0371098	0	0.00976607	0	0.00585982	0	0.0058596	0	-0.0214839	0	-0.00976518	0
-7.7	0.0351563	0	0.0117188	0	0.015625	0	0.015625	0	-0.0117188	0	0	0
-7.6	0.0351563	0	0.0117188	0	0.00390625	0	0.015625	0	-0.0234375	0	-0.0117188	0
-7.5	0.0351563	0	0.0117188	0	0.00390625	0	0.015625	0	-0.0234375	0	-0.0117188	0
-7.4	0.0410154	0	0.0175779	0	0.0097654	0	0.0097654	0	-0.0175783	0	-0.0058596	0
-7.3	0.0332031	0	0.00585938	0	0.00976563	0	0.00976563	0	-0.0175781	0	-0.00585938	0
-7.2	0.0332031	0	0.0175781	0	0.00976563	0	0.00976563	0	-0.0175781	0	-0.00585938	0
-7.1	0.0332033	0	0.00585952	0	0.00195327	0	0.00976577	0	-0.017578	0	-0.0136717	0
-7	0.0410156	0	0.0136719	0	-0.00195313	0	0.0175781	0	-0.00976563	0	-0.00585938	0
-6.9	0.0488283	0	0.0136721	0	-0.0019529	0	0.0175783	0	-0.0097654	0	-0.00585915	0
-6.8	0.0468748	0	0.019531	0	0.00390603	0	0.0234375	0	-0.00390647	0	-2.23517e-07	0
-6.7	0.046875	0	0.0195313	0	0.00390625	0	0.0234375	0	-0.0117188	0	0	0
-6.6	0.0527342	0	0.0253904	0	0.0097654	0	0.0292969	0	-0.0058596	0	0.00585915	0
-6.5	0.0527344	0	0.0253906	0	0.00976563	0	0.0292969	0	-0.0175781	0	-0.00585938	0
-6.4	0.0566405	0	0.0292967	0	0.0136717	0	0.033203	0	-0.013672	0	-0.00195327	0
-6.3	0.0449221	0	0.0292971	0	0.0136721	0	0.0332033	0	-0.0019529	0	-0.0019529	0
-6.2	0.0546875	0	0.0390625	0	0.0234375	0	0.0429688	0	-0.00390625	0	0.0078125	0
-6.1	0.0546875	0	0.0390625	0	0.0234375	0	0.0351563	0	-0.015625	0	-0.00390625	0
-6	0.0546875	0	0.0390625	0	0.0234375	0	0.0351563	0	-0.015625	0	-0.00390625	0
-5.9	0.0546875	0	0.0390625	0	0.015625	0	0.0351563	0	-0.00390625	0	-0.00390625	0
-5.8	0.0468752	0	0.0390627	0	0.0156252	0	0.0351565	0	-0.00390603	0	-0.00390603	0
-5.7	0.0585938	0	0.0507813	0	0.015625	0	0.0351563	0	0.0078125	0	0.0078125	0
-5.6	0.0664063	0	0.0390625	0	0.015625	0	0.0351563	0	0.0078125	0	0	0
-5.5	0.0585938	0	0.0390625	0	0.015625	0	0.046875	0	0.0078125	0	0	0
-5.4	0.0624999	0	0.0429686	0	0.00781235	0	0.0507811	0	0.0117186	0	0.0039061	0
-5.3	0.0625002	0	0.0351565	0	0.00781272	0	0.0507815	0	0.011719	0	0.00390647	0
-5.2	0.0566406	0	0.0488281	0	0.0136719	0	0.0566406	0	0.0175781	0	0.00976563	0
-5.1	0.0566406	0	0.0488281	0	0.0136719	0	0.0449219	0	0.0175781	0	0.00976563	0
-5	0.0625	0	0.0664063	0	0.0195313	0	0.0625	0	0.0234375	0	0.015625	0
-4.9	0.0624998	0	0.066406	0	0.019531	0	0.0624998	0	0.0234373	0	0.0156248	0
-4.8	0.0429692	0	0.0546879	0	4.47035e-07	0	0.0585938	0	0.0117192	0	0.0039067	0
-4.7	0.0429688	0	0.0546875	0	0	0	0.0585938	0	0	0	0.00390625	0
-4.6	0.0429688	0	0.0546875	0	-0.0117188	0	0.0507813	0	0	0	0.00390625	0
-4.5	0.0507813	0	0.0546875	0	-0.0117188	0	0.0585938	0	0	0	0.00390625	0
-4.4	0.0507813	0	0.0546875	0	-0.0117188	0	0.0507813	0	-0.0078125	0	0.0117188	0
-4.3	0.0429688	0	0.0546875	0	-0.0117188	0	0.0507813	0	-0.0078125	0	0.0117188	0
-4.2	0.0429688	0	0.0546875	0	-0.0195313	0	0.0585938	0	-0.0078125	0	0.0117188	0
-4.1	0.0488279	0	0.0605467	0	-0.0136721	0	0.0644531	0	-0.00195335	0	0.0292967	0
-4	0.0371094	0	0.0488281	0	-0.00585938	0	0.0644531	0	-0.00195313	0	0.0292969	0
-3.9	0.0429685	0	0.0546873	0	-2.23517e-07	0	0.0703123	0	-0.00781272	0	0.035156	0
-3.8	0.035156	0	0.0546873	0	-0.00781272	0	0.0703123	0	-0.00781272	0	0.035156	0
-3.7	0.0292969	0	0.0605469	0	-0.0136719	0	0.0644531	0	-0.0136719	0	0.0175781	0
-3.6	0.0429683	0	0.0781246	0	-4.47035e-07	0	0.0703123	0	-0.00781295	0	0.0351558	0
-3.5	0.0371094	0	0.0800781	0	0.00585938	0	0.0644531	0	-0.0136719	0	0.0175781	0
-3.4	0.0429686	0	0.0742186	0	0.0195311	0	0.0585936	0	-0.00781265	0	0.0234374	0
-3.3	0.0351566	0	0.0781254	0	0.0156254	0	0.0624998	0	-0.00390588	0	0.00781287	0
-3.2	0.0253906	0	0.0800781	0	0.0253906	0	0.0722656	0	-0.00195313	0	0.00976563	0
-3.1	0.0332033	0	0.0839845	0	0.0410158	0	0.0605469	0	0.00195327	0	0.013672	0
-3	0.0234375	0	0.0742188	0	0.0507813	0	0.0585938	0	0.0117188	0	0.015625	0
-2.9	0.0117192	0	0.0742192	0	0.0585942	0	0.0585942	0	0.0195317	0	0.0117192	0
-2.8	0.0175779	0	0.0800779	0	0.0839842	0	0.0644531	0	0.0371092	0	0.0292967	0
-2.7	0.0117188	0	0.0820313	0	0.0898438	0	0.0664063	0	0.03125	0	0.0234375	0
-2.6	0.011719	0	0.0859378	0	0.089844	0	0.0507813	0	0.0312503	0	0.0156253	0
-2.5	0.0117188	0	0.0976563	0	0.109375	0	0.0585938	0	0.0429688	0	0.015625	0
-2.4	0.0117192	0	0.0859379	0	0.109375	0	0.0703129	0	0.0507817	0	0.0117192	0
-2.3	0.0195307	0	0.105468	0	0.117187	0	0.070312	0	0.0624995	0	0.023437	0
-2.2	-0.00390625	0	0.101563	0	0.125	0	0.0664063	0	0.0585938	0	0.0195313	0
-2.1	0.00195342	0	0.0839847	0	0.126953	0	0.0566403	0	0.0605472	0	0.0214847	0
-2	-0.00390625	0	0.109375	0	0.164063	0	0.0625	0	0.0859375	0	0.0390625	0
-1.9	0.00781228	0	0.128906	0	0.214844	0	0.0859373	0	0.0859373	0	0.0585935	0
-1.8	-0.00781205	0	0.144532	0	0.238282	0	0.0898429	0	0.0820317	0	0.0937504	0
-1.7	0.0117188	0	0.164063	0	0.261719	0	0.109375	0	0.09375	0	0.105469	0
-1.6	-0.0117176	0	0.152345	0	0.257814	0	0.105468	0	0.117189	0	0.140626	0
-1.5	0.00195313	0	0.115234	0	0.220703	0	0.0488281	0	0.142578	0	0.154297	0
-1.4	-0.0195313	0	0.113281	0	0.199219	0	0.078125	0	0.140625	0	0.125	0
-1.3	-0.0429679	0	0.160157	0	0.144532	0	0.195311	0	0.175782	0	0.148438	0
-1.2	-0.0527344	0	0.0410156	0	0.0839844	0	0.115234	0	0.0683594	0	0.0683594	0
-1.1	-0.0742149	0	-0.140621	0	0.175785	0	-0.117185	0	0.0351601	0	0.148441	0
-1	-0.103516	0	-0.408203	0	0.00585938	0	-0.123047	0	-0.103516	0	0.0996094	0
-0.900002	-0.353533	0	-0.189471	0	-0.255877	0	-0.294939	0	-0.302752	0	0.150373	0
-0.800003	-0.0234508	0	-0.0312633	0	-0.074232	0	-0.0468727	0	-0.22267	0	-0.0820445	0
-0.700001	-0.0371094	0	0.00585938	0	0.0527344	0	-0.00976563	0	-0.126953	0	-0.0253906	0
-0.600002	-0.0644541	0	0.0996084	0	0.00585836	0	0.033203	0	-0.0839854	0	-0.0410166	0
-0.5	-0.0253906	0	0.0878906	0	0.00976563	0	-0.0214844	0	-0.0253906	0	0.00585938	0
-0.400002	-0.0292966	0	0.115235	0	-0.00976539	0	-0.0214841	0	0.00195336	0	-0.0371091	0
-0.300003	-0.0332024	0	0.13086	0	0.0253914	0	-0.0371107	0	0.0175789	0	-0.0292961	0
-0.200001	-0.0410156	0	0.00195313	0	0.0878906	0	-0.0722656	0	-0.0292969	0	-0.0878906	0
-0.100002	-0.107418	0	0.326176	0	0.158207	0	-0.0214847	0	-0.0488243	0	-0.115231	0
0	-0.142578	0	0.0292969	0	-0.0957031	0	-0.0253906	0	-0.103516	0	-0.0917969	0
0.0999985	15.078	15.62	33.3715	30.56	53.631	44.51	93.1413	78.94	147.191	135	318.613	284.4
0.199997	15.0802	15.6223	33.3764	30.5645	53.641	44.5191	93.1628	78.9582	147.23	135.036	318.695	284.473
0.299999	15.0823	15.6245	33.3815	30.5691	53.651	44.5282	93.1843	78.9764	147.27	135.073	318.776	284.545
0.399998	15.0846	15.6268	33.3864	30.5736	53.661	44.5373	93.2056	78.9945	147.309	135.109	318.858	284.618
0.5	15.0868	15.6291	33.3914	30.5782	53.671	44.5464	93.2271	79.0127	147.349	135.145	318.938	284.69
0.599998	15.089	15.6314	33.3963	30.5827	53.6809	44.5554	93.2484	79.0308	147.388	135.181	319.019	284.762
0.699997	15.0911	15.6336	33.4013	30.5873	53.691	44.5645	93.2698	79.0489	147.428	135.218	319.1	284.834
0.799999	15.0933	15.6359	33.4062	30.5918	53.701	44.5736	93.2913	79.0671	147.467	135.254	319.18	284.906
0.899998	15.0956	15.6382	33.4113	30.5964	53.711	44.5827	93.3126	79.0852	147.507	135.29	319.261	284.978
1	15.0978	15.6405	33.4162	30.6009	53.7209	44.5917	93.334	79.1033	147.546	135.326	319.34	285.049
1.1	15.0999	15.6427	33.4211	30.6054	53.7309	44.6008	93.3553	79.1214	147.585	135.362	319.421	285.121
1.2	15.1021	15.645	33.4261	30.61	53.7409	44.6099	93.3767	79.1395	147.624	135.398	319.501	285.192
1.3	15.1043	15.6473	33.431	30.6145	53.7508	44.6189	80.5815	79.1575	147.664	135.434	319.58	285.263
1.4	15.1065	15.6495	33.4361	30.6191	53.7608	44.628	80.6	79.1756	147.703	135.47	319.66	285.334
1.5	15.1087	15.6518	33.441	30.6236	53.7708	44.6371	80.6183	79.1936	147.741	135.505	319.739	285.405
1.6	15.1109	15.6541	33.4459	30.6281	53.7807	44.6461	80.6367	79.2117	147.78	135.541	319.819	285.476
1.7	15.1131	15.6564	33.4509	30.6327	53.7907	44.6552	80.655	79.2297	147.82	135.577	319.897	285.546
1.8	15.1152	15.6586	33.4558	30.6372	53.8006	44.6642	80.6735	79.2478	147.859	135.613	319.976	285.616
1.9	15.1175	15.6609	33.4607	30.6417	53.8106	44.6733	80.6918	79.2658	147.897	135.648	320.055	285.687
2	15.1197	15.6632	33.4658	30.6463	53.8205	44.6823	80.7101	79.2838	147.936	135.684	320.134	285.757
2.1	15.1218	15.6654	33.4707	30.6508	53.8305	44.6914	80.7284	79.3018	147.976	135.72	320.211	285.826
2.2	15.124	15.6677	33.4756	30.6553	53.8404	44.7004	80.7468	79.3198	148.014	135.755	320.289	285.896
2.3	15.1263	15.67	33.4806	30.6599	53.8503	44.7094	80.765	79.3377	148.053	135.791	320.368	285.966
2.4	15.1284	15.6722	33.4855	30.6644	53.8604	44.7185	80.7833	79.3557	148.091	135.826	320.445	286.035
2.5	15.1306	15.6745	33.4904	30.6689	53.8703	44.7275	80.8016	79.3737	148.13	135.862	320.522	286.104
2.6	15.1328	15.6768	33.4955	30.6735	53.8803	44.7366	80.8199	79.3916	148.168	135.897	320.601	286.174
2.7	15.1349	15.679	33.5004	30.678	53.8902	44.7456	80.8381	79.4095	148.208	135.933	320.678	286.243
2.8	15.1372	15.6813	33.5053	30.6825	53.9001	44.7546	80.8564	79.4275	148.246	135.968	320.754	286.311
2.9	15.1394	15.6836	33.5103	30.6871	53.91	44.7636	80.8746	79.4454	148.284	136.003	320.832	286.38
3	15.1416	15.6859	33.5152	30.6916	53.92	44.7727	80.8928	79.4633	148.323	136.039	320.909	286.449
3.1	15.1437	15.6881	33.5201	30.6961	53.9299	44.7817	80.9111	79.4812	148.361	136.074	320.985	286.517
3.2	15.1459	15.6904	33.5251	30.7006	53.9398	44.7907	80.9293	79.4991	148.4	136.109	292.403	286.585
3.3	15.1482	15.6927	33.5301	30.7052	53.9497	44.7997	80.9475	79.517	148.438	136.144	292.472	286.653
3.4	15.1503	15.6949	33.535	30.7097	53.9596	44.8087	80.9656	79.5348	148.476	136.179	292.541	286.721
3.5	15.1525	15.6972	33.5399	30.7142	53.9695	44.8177	80.9839	79.5527	148.514	136.214	292.611	286.789
3.6	15.1547	15.6995	33.5448	30.7187	53.9795	44.8268	81.0021	79.5706	148.552	136.249	292.68	286.857
3.7	15.1569	15.7017	33.5498	30.7233	53.9894	44.8358	81.0202	79.5884	148.59	136.284	292.749	286.924
3.8	15.1591	15.704	33.5548	30.7278	53.9993	44.8448	81.0383	79.6062	148.629	136.319	292.818	286.992
3.9	15.1613	15.7063	33.5597	30.7323	54.0092	44.8538	81.0565	79.6241	148.667	136.354	292.886	287.059
4	15.1634	15.7085	33.5646	30.7368	54.0191	44.8628	81.0747	79.6419	148.705	136.389	292.955	287.126
4.1	15.1656	15.7108	33.5696	30.7414	54.029	44.8718	81.0928	79.6597	148.743	136.424	293.023	287.193
4.2	15.1679	15.7131	33.5745	30.7459	54.0389	44.8808	81.1109	79.6775	148.781	136.459	293.091	287.26
4.3	15.17	15.7153	33.5794	30.7504	54.0487	44.8897	81.129	79.6953	148.819	136.494	293.16	287.327
4.4	15.1722	15.7176	33.5844	30.7549	54.0586	44.8987	81.147	79.713	148.858	136.529	293.227	287.393
4.5	15.1744	15.7199	33.5893	30.7594	54.0685	44.9077	81.1652	79.7308	148.895	136.563	293.295	287.46
4.6	15.1765	15.7221	33.5943	30.764	54.0784	44.9167	81.1833	79.7486	148.933	136.598	293.363	287.526
4.7	15.1788	15.7244	33.5992	30.7685	54.0883	44.9257	81.2013	79.7663	148.971	136.633	293.43	287.592
4.8	15.181	15.7267	33.6041	30.773	54.0982	44.9347	81.2193	79.784	149.008	136.667	293.497	287.658
4.9	15.1831	15.7289	33.609	30.7775	54.108	44.9436	81.2374	79.8018	149.046	136.702	293.565	287.724
5	15.1853	15.7312	33.6139	30.782	54.1179	44.9526	81.2555	79.8195	149.083	136.736	293.631	287.789
5.1	15.1875	15.7335	33.6189	30.7865	54.1278	44.9616	81.2735	79.8372	149.121	136.771	293.698	287.855
5.2	15.1897	15.7357	33.6239	30.7911	54.1377	44.9706	81.2915	79.8549	149.158	136.805	293.765	287.92
5.3	15.1919	15.738	33.6288	30.7956	54.1475	44.9795	81.3095	79.8726	149.197	136.84	293.832	287.986
5.4	15.1941	15.7403	33.6337	30.8001	54.1574	44.9885	81.3275	79.8903	149.234	136.874	293.898	288.051
5.5	15.1962	15.7425	33.6386	30.8046	54.1673	44.9975	81.3454	79.9079	149.271	136.908	293.965	288.116
5.6	15.1985	15.7448	33.6435	30.8091	54.177	45.0064	81.3635	79.9256	149.309	136.943	294.03	288.18
5.7	15.2007	15.7471	33.6485	30.8136	54.1869	45.0154	81.3815	79.9433	149.346	136.977	294.096	288.245
5.8	15.2028	15.7493	33.6534	30.8181	54.1967	45.0243	81.3994	79.9609	149.383	137.011	294.163	288.31
5.9	15.205	15.7516	33.6584	30.8227	54.2066	45.0333	81.4173	79.9785	149.42	137.045	294.228	288.374
6	15.2071	15.7538	33.6633	30.8272	54.2164	45.0422	81.4353	79.9962	149.458	137.08	294.293	288.438
6.1	15.2094	15.7561	33.6682	30.8317	54.2263	45.0512	81.4532	80.0138	149.495	137.114	294.36	288.503
6.2	15.2116	15.7584	33.6731	30.8362	54.2361	45.0601	81.4712	80.0314	149.532	137.148	294.425	288.567
6.3	15.2137	15.7606	33.678	30.8407	54.246	45.0691	81.4891	80.049	149.57	137.182	294.49	288.631
6.4	15.2159	15.7629	33.683	30.8452	54.2558	45.078	81.507	80.0666	149.607	137.216	294.554	288.694
6.5	15.2181	15.7652	33.6879	30.8497	49.1898	45.0869	81.5248	80.0841	149.644	137.25	294.62	288.758
6.6	15.2203	15.7674	33.6928	30.8542	49.1996	45.0959	81.5427	80.1017	149.681	137.284	294.684	288.821
6.7	15.2225	15.7697	33.6977	30.8587	49.2093	45.1048	81.5606	80.1193	149.718	137.318	294.749	288.885
6.8	15.2246	15.7719	33.7026	30.8632	49.219	45.1137	81.5785	80.1368	149.755	137.352	294.814	288.948
6.9	15.2268	15.7742	33.7075	30.8677	49.2289	45.1227	81.5963	80.1543	149.791	137.385	294.878	289.011
7	15.2291	15.7765	33.7124	30.8722	49.2386	45.1316	81.6142	80.1719	149.828	137.419	294.942	289.074
7.1	15.2312	15.7787	33.7174	30.8767	49.2483	45.1405	81.632	80.1894	149.865	137.453	295.006	289.137
7.2	15.2334	15.781	33.7223	30.8812	49.258	45.1494	81.6498	80.2069	149.902	137.487	295.07	289.199
7.3	15.2356	15.7833	33.7272	30.8857	49.2678	45.1584	81.6676	80.2244	149.938	137.52	295.134	289.262
7.4	15.2377	15.7855	33.7321	30.8902	49.2775	45.1673	81.6855	80.2419	149.975	137.554	295.197	289.324
7.5	15.24	15.7878	33.737	30.8947	49.2872	45.1762	81.7033	80.2594	150.012	137.588	295.261	289.386
7.6	15.2421	15.79	33.7419	30.8992	49.2969	45.1851	81.721	80.2768	150.048	137.621	295.325	289.449
7.7	15.2443	15.7923	33.7468	30.9037	49.3067	45.194	81.7388	80.2943	150.085	137.655	295.388	289.511
7.8	15.2465	15.7946	33.7518	30.9082	49.3164	45.2029	81.7566	80.3118	150.121	137.688	295.45	289.572
7.9	15.2487	15.7968	33.7567	30.9127	49.3261	45.2118	81.7743	80.3292	150.158	137.722	295.514	289.634
8	15.2509	15.7991	33.7616	30.9172	49.3358	45.2207	81.792	80.3466	150.194	137.755	295.577	289.696
8.1	15.253	15.8013	33.7665	30.9217	49.3455	45.2296	81.8099	80.3641	150.231	137.789	295.639	289.757
8.2	15.2552	15.8036	33.7714	30.9262	49.3552	45.2385	81.8276	80.3815	150.267	137.822	295.702	289.819
8.3	15.2574	15.8059	33.7763	30.9307	49.3649	45.2474	81.8453	80.3989	150.303	137.855	295.765	289.88
8.4	15.2596	15.8081	33.7812	30.9352	49.3746	45.2563	81.863	80.4163	150.34	137.889	295.827	289.941
8.5	15.2618	15.8104	33.7862	30.9397	49.3843	45.2652	81.8807	80.4337	150.376	137.922	295.889	290.002
8.6	15.2639	15.8126	33.7911	30.9442	49.394	45.2741	81.8984	80.4511	150.412	137.955	295.951	290.063
8.7	15.2661	15.8149	33.796	30.9487	49.4038	45.283	81.916	80.4684	150.448	137.988	296.012	290.123
8.8	15.2683	15.8172	33.8009	30.9532	49.4135	45.2919	81.9337	80.4858	150.485	138.022	296.075	290.184
8.9	15.2705	15.8194	33.8058	30.9577	49.4231	45.3007	81.9515	80.5032	150.521	138.055	296.136	290.244
9	15.2727	15.8217	33.8107	30.9622	49.4328	45.3096	81.9691	80.5205	150.557	138.088	296.198	290.305
9.1	15.2748	15.8239	33.8156	30.9667	49.4425	45.3185	81.9867	80.5378	150.593	138.121	296.259	290.365
9.2	15.277	15.8262	33.8206	30.9712	49.4522	45.3274	82.0044	80.5552	150.629	138.154	296.321	290.425
9.3	15.2793	15.8285	33.8255	30.9757	49.4618	45.3362	82.022	80.5725	150.665	138.187	296.382	290.485
9.4	15.2814	15.8307	33.8303	30.9801	49.4715	45.3451	82.0396	80.5898	150.701	138.22	296.442	290.544
9.5	15.2836	15.833	33.8352	30.9846	49.4812	45.354	82.0572	80.6071	150.737	138.253	296.503	290.604
9.6	15.2857	15.8352	33.8401	30.9891	49.4908	45.3628	82.0748	80.6244	150.773	138.286	296.564	290.664
9.7	15.2879	15.8375	33.845	30.9936	49.5005	45.3717	82.0923	80.6416	150.808	138.318	296.625	290.723
9.8	15.2902	15.8398	33.8499	30.9981	49.5102	45.3806	82.11	80.6589	150.844	138.351	296.685	290.782
9.9	15.2923	15.842	33.8548	31.0026	49.5198	45.3894	82.1276	80.6762	150.88	138.384	296.745	290.841
10	15.2945	15.8443	33.8598	31.0071	49.5295	45.3983	82.1451	80.6934	150.916	138.417	296.805	290.9
10.1	15.2966	15.8465	33.8647	31.0116	49.5391	45.4071	82.1626	80.7106	150.951	138.449	296.865	290.959
10.2	15.2988	15.8488	33.8695	31.016	49.5489	45.416	82.1802	80.7279	150.987	138.482	296.926	291.018
10.3	15.301	15.851	33.8744	31.0205	49.5585	45.4248	82.1977	80.7451	151.023	138.515	296.986	291.077
10.4	15.3032	15.8533	33.8793	31.025	49.5682	45.4337	82.2152	80.7623	151.058	138.547	297.045	291.135
10.5	15.3054	15.8556	33.8842	31.0295	49.5778	45.4425	82.2327	80.7795	151.094	138.58	297.105	291.194
10.6	15.3075	15.8578	33.8891	31.034	49.5874	45.4513	82.2502	80.7967	151.129	138.612	297.164	291.252
10.7	15.3098	15.8601	33.8939	31.0384	49.5971	45.4602	82.2677	80.8139	151.165	138.645	297.224	291.31
10.8	15.3119	15.8623	33.8988	31.0429	49.6067	45.469	82.2853	80.8311	151.2	138.677	297.283	291.368
10.9	15.3141	15.8646	33.9038	31.0474	49.6164	45.4779	82.3027	80.8482	151.236	138.71	297.342	291.426
11	15.3162	15.8668	33.9087	31.0519	49.626	45.4867	82.3202	80.8654	151.27	138.742	297.401	291.484
11.1	15.3184	15.8691	33.9136	31.0564	49.6356	45.4955	82.3376	80.8825	151.305	138.774	297.459	291.541
11.2	15.3206	15.8713	33.9184	31.0608	49.6452	45.5043	82.3551	80.8997	151.341	138.807	297.518	291.599
11.3	15.3228	15.8736	33.9233	31.0653	49.6549	45.5132	82.3725	80.9168	151.376	138.839	297.577	291.656
11.4	15.325	15.8759	33.9282	31.0698	49.6645	45.522	82.3899	80.9339	151.411	138.871	297.636	291.714
11.5	15.3271	15.8781	33.9331	31.0743	49.6741	45.5308	82.4073	80.951	151.447	138.904	297.694	291.771
11.6	15.3294	15.8804	33.938	31.0788	49.6837	45.5396	82.4247	80.9681	151.482	138.936	297.752	291.828
11.7	15.3315	15.8826	33.9429	31.0832	49.6933	45.5484	82.4421	80.9852	151.517	138.968	297.81	291.885
11.8	15.3337	15.8849	33.9478	31.0877	49.7029	45.5572	82.4595	81.0023	151.552	139	297.867	291.941
11.9	15.3358	15.8871	33.9527	31.0922	49.7126	45.5661	82.4769	81.0194	151.587	139.032	297.926	291.998
12	15.338	15.8894	33.9576	31.0967	49.7222	45.5749	82.4943	81.0365	151.621	139.064	297.984	292.055
12.1	15.3402	15.8916	33.9624	31.1011	49.7318	45.5837	82.5117	81.0535	151.656	139.096	298.041	292.111
12.2	15.3424	15.8939	33.9673	31.1056	49.7414	45.5925	82.5291	81.0706	151.691	139.128	298.098	292.167
12.3	15.3446	15.8962	33.9722	31.1101	49.751	45.6013	82.5464	81.0876	151.726	139.16	298.156	292.224
12.4	15.3467	15.8984	33.977	31.1145	49.7606	45.6101	82.5637	81.1046	151.761	139.192	298.213	292.28
12.5	15.3489	15.9007	33.9819	31.119	49.7702	45.6189	82.5811	81.1217	151.796	139.224	298.27	292.336
12.6	15.3511	15.9029	33.9869	31.1235	49.7797	45.6276	82.5984	81.1387	151.831	139.256	298.327	292.391
12.7	15.3533	15.9052	33.9917	31.1279	49.7893	45.6364	82.6157	81.1557	151.865	139.287	298.384	292.447
12.8	15.3554	15.9074	33.9966	31.1324	49.7989	45.6452	82.633	81.1727	151.9	139.319	298.441	292.503
12.9	15.3576	15.9097	34.0015	31.1369	49.8085	45.654	82.6502	81.1896	151.934	139.351	298.497	292.558
13	15.3598	15.9119	34.0064	31.1414	49.8181	45.6628	82.6675	81.2066	151.969	139.383	298.553	292.613
13.1	15.362	15.9142	34.0112	31.1458	49.8277	45.6716	82.6848	81.2236	152.003	139.414	298.61	292.669
13.2	15.3641	15.9164	34.0161	31.1503	49.8373	45.6804	82.702	81.2405	152.038	139.446	298.666	292.724
13.3	15.3663	15.9187	34.0209	31.1547	49.8468	45.6891	82.7193	81.2575	152.073	139.478	298.722	292.779
13.4	15.3684	15.9209	34.0258	31.1592	49.8564	45.6979	82.7365	81.2744	152.107	139.509	298.779	292.834
13.5	15.3707	15.9232	34.0308	31.1637	49.866	45.7067	82.7538	81.2914	152.142	139.541	298.834	292.888
13.6	15.3728	15.9254	34.0356	31.1681	49.8755	45.7154	82.771	81.3083	152.175	139.572	298.89	292.943
13.7	15.375	15.9277	34.0405	31.1726	49.8851	45.7242	82.7882	81.3252	152.21	139.604	298.946	292.998
13.8	15.3771	15.9299	34.0454	31.1771	49.8947	45.733	82.8054	81.3421	152.244	139.635	299.001	293.052
13.9	15.3794	15.9322	34.0502	31.1815	49.9042	45.7417	82.8226	81.359	152.278	139.666	299.056	293.106
14	15.3815	15.9344	34.0551	31.186	49.9138	45.7505	82.8399	81.3759	152.313	139.698	299.111	293.16
14.1	15.3837	15.9367	34.06	31.1905	49.9233	45.7592	82.857	81.3927	152.347	139.729	299.167	293.215
14.2	15.3858	15.9389	34.0648	31.1949	49.9329	45.768	82.8742	81.4096	152.38	139.76	299.221	293.268
14.3	15.388	15.9412	34.0697	31.1994	49.9425	45.7768	82.8914	81.4265	152.415	139.792	299.276	293.322
14.4	15.3902	15.9434	34.0745	31.2038	49.952	45.7855	82.9085	81.4433	152.449	139.823	299.332	293.376
14.5	15.3924	15.9457	34.0795	31.2083	49.9616	45.7943	82.9256	81.4601	152.483	139.854	299.387	293.43
14.6	15.3945	15.9479	34.0843	31.2127	49.9711	45.803	82.9428	81.477	152.517	139.885	299.441	293.483
14.7	15.3967	15.9502	34.0892	31.2172	49.9806	45.8117	82.9599	81.4938	152.55	139.916	299.495	293.536
14.8	15.3989	15.9525	34.0941	31.2217	49.9902	45.8205	82.977	81.5106	152.584	139.947	299.55	293.59
14.9	15.4011	15.9547	34.0989	31.2261	49.9997	45.8292	82.9941	81.5274	152.619	139.979	299.604	293.643
15	15.4032	15.9569	34.1038	31.2306	50.0093	45.838	83.0112	81.5442	152.653	140.01	299.658	293.696
15.1	15.4054	15.9592	34.1086	31.235	50.0187	45.8467	83.0283	81.561	152.687	140.041	299.712	293.749
15.2	15.4075	15.9614	34.1135	31.2395	50.0282	45.8554	83.0454	81.5778	152.721	140.072	299.766	293.802
15.3	15.4098	15.9637	34.1183	31.2439	50.0377	45.8641	83.0624	81.5945	152.753	140.102	299.819	293.854
15.4	15.4119	15.9659	34.1233	31.2484	50.0473	45.8729	83.0795	81.6113	152.787	140.133	299.873	293.907
15.5	15.4141	15.9682	34.1281	31.2528	50.0568	45.8816	83.0965	81.628	152.821	140.164	299.926	293.959
15.6	15.4162	15.9704	34.133	31.2573	50.0663	45.8903	83.1136	81.6448	152.855	140.195	299.98	294.012
15.7	15.4184	15.9727	34.1378	31.2617	50.0758	45.899	83.1306	81.6615	152.888	140.226	300.033	294.064
15.8	15.4206	15.9749	34.1427	31.2662	50.0854	45.9078	83.1476	81.6782	152.922	140.257	300.087	294.116
15.9	15.4228	15.9772	34.1475	31.2706	50.0949	45.9165	83.1646	81.6949	152.955	140.287	300.14	294.168
16	15.4249	15.9794	34.1524	31.2751	50.1044	45.9252	83.1816	81.7116	152.989	140.318	300.193	294.22
16.1	15.4271	15.9817	34.1572	31.2795	50.1139	45.9339	83.1986	81.7283	153.023	140.349	300.246	294.272
16.2	15.4293	15.9839	34.1621	31.284	50.1234	45.9426	83.2156	81.745	153.055	140.379	300.298	294.323
16.3	15.4315	15.9862	34.1669	31.2884	50.1329	45.9513	83.2326	81.7617	153.089	140.41	300.351	294.375
16.4	15.4336	15.9884	34.1718	31.2929	50.1424	45.96	83.2496	81.7784	153.123	140.441	300.404	294.427
16.5	15.4358	15.9907	34.1767	31.2973	50.1519	45.9687	83.2665	81.795	153.156	140.471	300.456	294.478
16.6	15.4379	15.9929	34.1816	31.3018	50.1613	45.9774	83.2835	81.8117	153.189	140.502	300.508	294.529
16.7	15.4402	15.9952	34.1864	31.3062	50.1708	45.9861	83.3004	81.8283	153.222	140.532	300.56	294.58
16.8	15.4423	15.9974	34.1913	31.3107	50.1803	45.9948	83.3173	81.8449	153.255	140.562	300.612	294.631
16.9	15.4445	15.9997	34.1961	31.3151	50.1898	46.0035	83.3343	81.8616	153.289	140.593	300.664	294.682
17	15.4466	16.0019	34.2009	31.3195	50.1993	46.0122	83.3512	81.8782	153.321	140.623	300.716	294.733
17.1	15.4489	16.0042	34.2058	31.324	50.2088	46.0209	83.3681	81.8948	153.355	140.654	300.768	294.784
17.2	15.451	16.0064	34.2106	31.3284	50.2182	46.0295	83.385	81.9114	153.388	140.684	300.819	294.834
17.3	15.4532	16.0087	34.2155	31.3329	50.2277	46.0382	83.4019	81.928	153.42	140.714	300.871	294.885
17.4	15.4553	16.0109	34.2203	31.3373	50.2372	46.0469	83.4188	81.9446	153.453	140.744	300.922	294.935
17.5	15.4574	16.0131	34.2252	31.3418	50.2467	46.0556	83.4356	81.9611	153.487	140.775	300.973	294.985
17.6	15.4597	16.0154	34.2301	31.3462	50.2562	46.0643	83.4525	81.9777	153.52	140.805	301.025	295.036
17.7	15.4618	16.0176	34.2349	31.3506	50.2655	46.0729	83.4693	81.9942	153.552	140.835	301.076	295.086
17.8	15.464	16.0199	34.2398	31.3551	50.275	46.0816	83.4862	82.0108	153.585	140.865	301.127	295.136
17.9	15.4661	16.0221	34.2446	31.3595	50.2845	46.0903	83.503	82.0273	153.618	140.895	301.177	295.185
18	15.4684	16.0244	34.2494	31.3639	50.2939	46.0989	83.5198	82.0438	153.651	140.925	301.228	295.235
18.1	15.4705	16.0266	34.2543	31.3684	50.3034	46.1076	83.5367	82.0604	153.683	140.955	301.279	295.285
18.2	15.4727	16.0289	34.2591	31.3728	50.3129	46.1163	83.5535	82.0769	153.716	140.985	301.329	295.334
18.3	15.4748	16.0311	34.2639	31.3772	50.3223	46.1249	83.5703	82.0934	153.749	141.015	301.38	295.384
18.4	15.4769	16.0333	34.2688	31.3817	50.3318	46.1336	83.587	82.1098	153.781	141.045	301.43	295.433
18.5	15.4792	16.0356	34.2736	31.3861	50.3411	46.1422	83.6038	82.1263	153.814	141.075	301.48	295.482
18.6	15.4813	16.0378	34.2785	31.3906	50.3506	46.1509	83.6205	82.1428	153.847	141.105	301.53	295.531
18.7	15.4835	16.0401	34.2833	31.395	50.36	46.1595	83.6373	82.1593	153.879	141.135	301.58	295.58
18.8	15.4856	16.0423	34.2881	31.3994	50.3695	46.1682	83.654	82.1757	153.911	141.164	301.63	295.629
18.9	15.4879	16.0446	34.2929	31.4038	50.3789	46.1768	83.6708	82.1922	153.944	141.194	301.68	295.678
19	15.49	16.0468	34.2979	31.4083	50.3884	46.1855	83.6875	82.2086	153.977	141.224	301.73	295.727
19.1	15.4922	16.0491	34.3027	31.4127	50.3978	46.1941	83.7042	82.225	154.009	141.254	301.779	295.775
19.2	15.4943	16.0513	34.3075	31.4171	50.4071	46.2027	83.7209	82.2414	154.041	141.283	301.829	295.824
19.3	15.4964	16.0535	34.3124	31.4216	50.4166	46.2114	83.7377	82.2579	154.074	141.313	301.878	295.872
19.4	15.4987	16.0558	34.3172	31.426	50.426	46.22	83.7544	82.2743	154.106	141.343	301.927	295.92
19.5	15.5008	16.058	34.322	31.4304	50.4354	46.2286	83.7711	82.2907	154.138	141.372	301.977	295.969
19.6	15.503	16.0603	34.3269	31.4349	50.4449	46.2373	83.7877	82.307	154.171	141.402	302.026	296.017
19.7	15.5051	16.0625	34.3317	31.4393	50.4543	46.2459	83.8044	82.3234	154.202	141.431	302.075	296.065
19.8	15.5074	16.0648	34.3365	31.4437	50.4637	46.2545	83.8211	82.3398	154.235	141.461	302.123	296.112
19.9	15.5095	16.067	34.3413	31.4481	50.473	46.2631	83.8377	82.3561	154.267	141.49	302.172	296.16
20	15.5116	16.0692	34.3462	31.4526	50.4824	46.2717	83.8544	82.3725	154.298	141.519	302.221	296.208
20.1	15.5138	16.0715	34.351	31.457	50.4919	46.2804	83.871	82.3888	154.331	141.549	302.269	296.255
20.2	15.5159	16.0737	34.3558	31.4614	50.5013	46.289	83.8877	82.4052	154.362	141.578	302.318	296.303
20.3	15.5182	16.076	34.3607	31.4658	50.5107	46.2976	83.9043	82.4215	154.395	141.608	302.366	296.35
20.4	15.5203	16.0782	34.3655	31.4702	50.5201	46.3062	83.9209	82.4378	154.427	141.637	302.414	296.397
20.5	15.5224	16.0804	34.3704	31.4747	50.5294	46.3148	83.9374	82.4541	154.458	141.666	302.463	296.445
20.6	15.5246	16.0827	34.3752	31.4791	50.5388	46.3234	83.954	82.4704	154.49	141.695	302.511	296.492
20.7	15.5268	16.0849	34.38	31.4835	50.5482	46.332	83.9706	82.4867	154.523	141.725	302.559	296.539
20.8	15.529	16.0872	34.3848	31.4879	50.5576	46.3406	83.9872	82.503	154.554	141.754	302.606	296.585
20.9	15.5311	16.0894	34.3897	31.4924	50.567	46.3492	84.0037	82.5192	154.586	141.783	302.654	296.632
21	15.5332	16.0916	34.3945	31.4968	50.5764	46.3578	84.0203	82.5355	154.618	141.812	302.702	296.679
21.1	15.5354	16.0939	34.3993	31.5012	50.5857	46.3664	84.0368	82.5517	154.649	141.841	302.749	296.725
21.2	15.5376	16.0961	34.4041	31.5056	50.5951	46.375	84.0534	82.568	154.681	141.87	302.796	296.772
21.3	15.5398	16.0984	34.4089	31.51	50.6045	46.3836	84.0699	82.5842	154.712	141.899	302.843	296.818
21.4	15.5419	16.1006	34.4137	31.5144	50.6139	46.3922	84.0865	82.6005	154.744	141.928	302.89	296.864
21.5	15.544	16.1028	34.4186	31.5189	50.6233	46.4008	84.103	82.6167	154.776	141.957	302.937	296.91
21.6	15.5463	16.1051	34.4234	31.5233	50.6325	46.4093	84.1195	82.6329	154.807	141.986	302.985	296.957
21.7	15.5484	16.1073	34.4282	31.5277	50.6419	46.4179	84.136	82.6491	154.839	142.015	303.031	297.002
21.8	15.5506	16.1096	34.4331	31.5321	50.6513	46.4265	84.1524	82.6653	154.871	142.044	303.078	297.048
21.9	15.5527	16.1118	34.4379	31.5365	50.6607	46.4351	84.1689	82.6815	154.901	142.072	303.125	297.094
22	15.5548	16.114	34.4427	31.5409	50.67	46.4436	84.1853	82.6976	154.933	142.101	303.172	297.14
22.1	15.5571	16.1163	34.4475	31.5453	50.6794	46.4522	84.2018	82.7138	154.964	142.13	303.218	297.185
22.2	15.5592	16.1185	34.4523	31.5497	50.6887	46.4608	84.2183	82.73	154.996	142.159	303.265	297.231
22.3	15.5614	16.1208	34.4572	31.5542	50.698	46.4693	84.2347	82.7461	155.026	142.187	303.311	297.276
22.4	15.5635	16.123	34.462	31.5586	50.7074	46.4779	84.2511	82.7622	155.058	142.216	303.357	297.321
22.5	15.5657	16.1252	34.4668	31.563	50.7168	46.4865	84.2676	82.7784	155.09	142.245	303.404	297.367
22.6	15.5679	16.1275	34.4716	31.5674	50.726	46.495	84.284	82.7945	155.12	142.273	303.449	297.412
22.7	15.57	16.1297	34.4764	31.5718	50.7354	46.5036	84.3004	82.8106	155.152	142.302	303.495	297.457
22.8	15.5721	16.1319	34.4812	31.5762	50.7447	46.5121	84.3168	82.8267	155.182	142.33	303.54	297.501
22.9	15.5743	16.1342	34.486	31.5806	50.7541	46.5207	84.3331	82.8428	155.214	142.359	303.586	297.546
23	15.5765	16.1364	34.4908	31.585	50.7634	46.5292	84.3495	82.8589	155.245	142.387	303.632	297.591
23.1	15.5787	16.1387	34.4956	31.5894	50.7727	46.5378	84.3659	82.875	155.276	142.416	303.678	297.636
23.2	15.5808	16.1409	34.5004	31.5938	50.782	46.5463	84.3822	82.891	155.307	142.444	303.723	297.68
23.3	15.5829	16.1431	34.5052	31.5982	50.7914	46.5549	84.3986	82.9071	155.338	142.473	303.768	297.724
23.4	15.5852	16.1454	34.51	31.6026	50.8007	46.5634	84.415	82.9232	155.369	142.501	303.814	297.769
23.5	15.5873	16.1476	34.5148	31.607	50.8099	46.5719	84.4313	82.9392	155.399	142.529	303.859	297.813
23.6	15.5894	16.1498	34.5196	31.6114	50.8193	46.5805	84.4476	82.9552	155.431	142.558	303.903	297.857
23.7	15.5916	16.1521	34.5246	31.6159	50.8286	46.589	84.464	82.9713	155.462	142.586	303.948	297.901
23.8	15.5937	16.1543	34.5294	31.6203	50.8379	46.5975	84.4802	82.9873	155.492	142.614	303.993	297.945
23.9	15.5959	16.1565	34.5342	31.6247	50.8473	46.6061	84.4965	83.0033	155.523	142.642	304.038	297.989
24	15.5981	16.1588	34.539	31.6291	50.8565	46.6146	84.5128	83.0193	155.554	142.671	304.083	298.033
24.1	15.6002	16.161	34.5438	31.6335	50.8658	46.6231	84.5291	83.0353	155.585	142.699	304.127	298.076
24.2	15.6024	16.1633	34.5486	31.6379	50.8751	46.6316	84.5454	83.0513	155.615	142.727	304.172	298.12
24.3	15.6046	16.1655	34.5534	31.6423	50.8845	46.6402	84.5617	83.0673	155.646	142.755	304.216	298.163
24.4	15.6067	16.1677	34.5582	31.6467	50.8937	46.6487	84.5779	83.0832	155.676	142.783	304.261	298.207
24.5	15.6089	16.17	34.5629	31.651	50.903	46.6572	84.5942	83.0992	155.707	142.811	304.304	298.25
24.6	15.611	16.1722	34.5677	31.6554	50.9123	46.6657	84.6103	83.1151	155.737	142.839	304.348	298.293
24.7	15.6131	16.1744	34.5725	31.6598	50.9216	46.6742	84.6266	83.1311	155.768	142.867	304.392	298.336
24.8	15.6154	16.1767	34.5773	31.6642	50.9308	46.6827	84.6428	83.147	155.798	142.895	304.436	298.379
24.9	15.6175	16.1789	34.5821	31.6686	50.9401	46.6912	84.659	83.1629	155.829	142.923	304.48	298.422
25	15.6196	16.1811	34.5869	31.673	50.9494	46.6997	84.6753	83.1789	155.859	142.951	304.524	298.465
25.1	15.6218	16.1834	34.5917	31.6774	50.9586	46.7082	84.6915	83.1948	155.89	142.979	304.568	298.508
25.2	15.624	16.1856	34.5965	31.6818	50.9679	46.7167	84.7077	83.2107	155.919	143.006	304.611	298.55
25.3	15.6261	16.1878	34.6013	31.6862	50.9772	46.7252	84.7237	83.2265	155.95	143.034	304.654	298.593
25.4	15.6283	16.1901	34.6061	31.6906	50.9865	46.7337	84.7399	83.2424	155.98	143.062	304.697	298.635
25.5	15.6304	16.1923	34.6109	31.695	50.9957	46.7422	84.7561	83.2583	156.011	143.09	304.741	298.678
25.6	15.6326	16.1945	34.6157	31.6994	51.005	46.7507	84.7723	83.2742	156.04	143.117	304.784	298.72
25.7	15.6348	16.1968	34.6205	31.7038	51.0143	46.7592	84.7884	83.29	156.071	143.145	304.827	298.762
25.8	15.6369	16.199	34.6254	31.7082	51.0236	46.7677	84.8046	83.3059	156.102	143.173	304.87	298.804
25.9	15.639	16.2012	34.6302	31.7126	51.0328	46.7762	84.8207	83.3217	156.131	143.2	304.913	298.846
26	15.6412	16.2035	34.6349	31.7169	51.042	46.7846	84.8367	83.3375	156.161	143.228	304.955	298.888
26.1	15.6434	16.2057	34.6397	31.7213	51.0513	46.7931	84.8529	83.3534	156.192	143.256	304.998	298.93
26.2	15.6455	16.2079	34.6445	31.7257	51.0605	46.8016	84.869	83.3692	156.221	143.283	305.041	298.972
26.3	15.6477	16.2102	34.6493	31.7301	51.0698	46.8101	84.8851	83.385	156.252	143.311	305.083	299.013
26.4	15.6498	16.2124	34.6541	31.7345	51.079	46.8185	84.9012	83.4008	156.281	143.338	305.126	299.055
26.5	15.652	16.2146	34.6589	31.7389	51.0883	46.827	84.9173	83.4166	156.311	143.365	305.168	299.096
26.6	15.6542	16.2169	34.6637	31.7433	51.0975	46.8355	84.9333	83.4324	156.341	143.393	305.211	299.138
26.7	15.6563	16.2191	34.6684	31.7476	51.1067	46.8439	84.9493	83.4481	156.371	143.42	305.252	299.179
26.8	15.6584	16.2213	34.6732	31.752	51.116	46.8524	84.9654	83.4639	156.401	143.448	305.294	299.22
26.9	15.6605	16.2235	34.678	31.7564	51.1252	46.8609	84.9814	83.4796	156.431	143.475	305.336	299.261
27	15.6628	16.2258	34.6828	31.7608	51.1344	46.8693	84.9975	83.4954	156.46	143.502	305.378	299.302
27.1	15.6649	16.228	34.6876	31.7652	51.1437	46.8778	85.0135	83.5111	156.49	143.529	305.42	299.343
27.2	15.667	16.2302	34.6924	31.7696	51.1528	46.8862	85.0295	83.5269	156.52	143.557	305.461	299.384
27.3	15.6692	16.2325	34.6971	31.7739	51.1621	46.8947	85.0455	83.5426	156.55	143.584	305.503	299.425
27.4	15.6714	16.2347	34.7019	31.7783	51.1713	46.9031	85.0615	83.5583	156.579	143.611	305.545	299.466
27.5	15.6735	16.2369	34.7067	31.7827	51.1806	46.9116	85.0775	83.574	156.609	143.638	305.586	299.506
27.6	15.6757	16.2392	34.7115	31.7871	51.1897	46.92	85.0935	83.5897	156.638	143.665	305.628	299.547
27.7	15.6778	16.2414	34.7163	31.7915	51.1989	46.9284	85.1095	83.6054	156.667	143.692	305.669	299.587
27.8	15.6799	16.2436	34.721	31.7958	51.2082	46.9369	85.1254	83.6211	156.698	143.72	305.709	299.627
27.9	15.6822	16.2459	34.7258	31.8002	51.2173	46.9453	85.1413	83.6367	156.727	143.747	305.751	299.668
28	15.6843	16.2481	34.7306	31.8046	51.2266	46.9538	85.1573	83.6524	156.757	143.774	305.792	299.708
28.1	15.6864	16.2503	34.7354	31.809	51.2358	46.9622	85.1732	83.668	156.786	143.801	305.833	299.748
28.2	15.6885	16.2525	34.7401	31.8133	51.2449	46.9706	85.1892	83.6837	156.815	143.827	305.874	299.788
28.3	15.6908	16.2548	34.7449	31.8177	51.2542	46.9791	85.2051	83.6993	156.844	143.854	305.915	299.828
28.4	15.6929	16.257	34.7497	31.8221	51.2634	46.9875	85.221	83.715	156.873	143.881	305.955	299.868
28.5	15.695	16.2592	34.7545	31.8265	51.2725	46.9959	85.2369	83.7306	156.903	143.908	305.995	299.907
28.6	15.6972	16.2615	34.7592	31.8308	51.2817	47.0043	85.2528	83.7462	156.932	143.935	306.036	299.947
28.7	15.6993	16.2637	34.764	31.8352	51.2909	47.0127	85.2687	83.7618	156.962	143.962	306.076	299.986
28.8	15.7015	16.2659	34.7688	31.8396	51.3001	47.0212	85.2846	83.7774	156.991	143.989	306.117	300.026
28.9	15.7036	16.2681	34.7736	31.844	51.3093	47.0296	85.3004	83.793	157.02	144.015	306.156	300.065
29	15.7058	16.2704	34.7783	31.8483	51.3185	47.038	85.3163	83.8086	157.049	144.042	306.197	300.105
29.1	15.7079	16.2726	34.7831	31.8527	51.3276	47.0464	85.3321	83.8241	157.078	144.069	306.237	300.144
29.2	15.7101	16.2748	34.788	31.8571	51.3368	47.0548	85.348	83.8397	157.107	144.095	306.277	300.183
29.3	15.7122	16.277	34.7926	31.8614	51.346	47.0632	85.3638	83.8552	157.136	144.122	306.317	300.222
29.4	15.7144	16.2793	34.7975	31.8658	51.3551	47.0716	85.3796	83.8708	157.166	144.149	306.356	300.261
29.5	15.7165	16.2815	34.8023	31.8702	51.3643	47.08	85.3954	83.8863	157.194	144.175	306.396	300.3
29.6	15.7187	16.2837	34.807	31.8745	51.3734	47.0884	85.4112	83.9018	157.223	144.202	306.436	300.339
29.7	15.7209	16.286	34.8118	31.8789	51.3826	47.0968	85.4271	83.9174	157.252	144.228	306.475	300.377
29.8	15.723	16.2882	34.8166	31.8833	51.3918	47.1052	85.4429	83.9329	157.281	144.255	306.514	300.416
29.9	15.7251	16.2904	34.8213	31.8876	51.4009	47.1136	85.4586	83.9484	157.31	144.281	306.554	300.455
30	15.7272	16.2926	34.8261	31.892	51.4101	47.122	85.4744	83.9639	157.339	144.308	306.593	300.493
30.1	15.7295	16.2949	34.8309	31.8964	51.4193	47.1304	85.4902	83.9794	157.367	144.334	306.632	300.531
30.2	15.7316	16.2971	34.8356	31.9007	51.4283	47.1387	85.5059	83.9948	157.396	144.36	306.672	300.57
30.3	15.7337	16.2993	34.8404	31.9051	51.4375	47.1471	85.5216	84.0103	157.425	144.387	306.71	300.608
30.4	15.7358	16.3015	34.8452	31.9095	51.4467	47.1555	85.5374	84.0258	157.453	144.413	306.749	300.646
30.5	15.7381	16.3038	34.8499	31.9138	51.4558	47.1639	85.5531	84.0412	157.482	144.439	306.788	300.684
30.6	15.7402	16.306	34.8547	31.9182	51.465	47.1723	85.5689	84.0567	157.511	144.466	306.827	300.722
30.7	15.7423	16.3082	34.8594	31.9225	51.474	47.1806	85.5846	84.0721	157.54	144.492	306.865	300.76
30.8	15.7444	16.3104	34.8642	31.9269	51.4832	47.189	85.6002	84.0875	157.568	144.518	306.904	300.798
30.9	15.7466	16.3127	34.869	31.9313	51.4924	47.1974	85.616	84.103	157.596	144.544	306.943	300.836
31	15.7488	16.3149	34.8737	31.9356	51.5014	47.2057	85.6317	84.1184	157.625	144.57	306.981	300.873
31.1	15.7509	16.3171	34.8785	31.94	51.5106	47.2141	85.6474	84.1338	157.653	144.596	307.019	300.911
31.2	15.753	16.3193	34.8832	31.9443	51.5197	47.2225	85.663	84.1492	157.682	144.623	307.057	300.948
31.3	15.7552	16.3216	34.888	31.9487	51.5288	47.2308	85.6787	84.1646	157.711	144.649	307.096	300.986
31.4	15.7574	16.3238	34.8927	31.953	51.538	47.2392	85.6943	84.1799	157.739	144.675	307.134	301.023
31.5	15.7595	16.326	34.8975	31.9574	51.547	47.2475	85.71	84.1953	157.768	144.701	307.172	301.06
31.6	15.7616	16.3282	34.9023	31.9618	51.5562	47.2559	85.7257	84.2107	157.796	144.727	307.21	301.098
31.7	15.7638	16.3305	34.907	31.9661	51.5652	47.2642	85.7412	84.226	157.824	144.753	307.248	301.135
31.8	15.766	16.3327	34.9118	31.9705	51.5744	47.2726	85.7569	84.2414	157.853	144.779	307.286	301.172
31.9	15.7681	16.3349	34.9165	31.9748	51.5835	47.2809	85.7725	84.2567	157.88	144.804	307.324	301.209
32	15.7702	16.3371	34.9213	31.9792	51.5926	47.2893	85.7881	84.272	157.908	144.83	307.36	301.245
32.1	15.7724	16.3394	34.926	31.9835	51.6017	47.2976	85.8037	84.2874	157.936	144.856	307.398	301.282
32.2	15.7745	16.3416	34.9308	31.9879	51.6108	47.306	85.8193	84.3027	157.965	144.882	307.436	301.319
32.3	15.7767	16.3438	34.9355	31.9922	51.6199	47.3143	85.8349	84.318	157.993	144.908	307.474	301.356
32.4	15.7788	16.346	34.9403	31.9966	51.629	47.3226	85.8505	84.3333	158.022	144.934	307.51	301.392
32.5	15.7809	16.3482	34.945	32.0009	51.6381	47.331	85.866	84.3486	158.049	144.959	307.548	301.429
32.6	15.7831	16.3505	34.9498	32.0053	51.6472	47.3393	85.8815	84.3638	158.077	144.985	307.585	301.465
32.7	15.7853	16.3527	34.9545	32.0096	51.6562	47.3476	85.8971	84.3791	158.105	145.011	307.621	301.501
32.8	15.7874	16.3549	34.9593	32.014	51.6654	47.356	85.9127	84.3944	158.133	145.036	307.659	301.538
32.9	15.7895	16.3571	34.964	32.0183	51.6745	47.3643	85.9281	84.4096	158.161	145.062	307.696	301.574
33	15.7917	16.3594	34.9688	32.0227	51.6835	47.3726	85.9437	84.4249	158.189	145.088	307.733	301.61
33.1	15.7939	16.3616	34.9735	32.027	51.6926	47.3809	85.9592	84.4401	158.217	145.113	307.769	301.646
33.2	15.796	16.3638	34.9783	32.0314	51.7016	47.3892	85.9748	84.4554	158.245	145.139	307.806	301.682
33.3	15.7981	16.366	34.983	32.0357	51.7108	47.3976	85.9902	84.4706	158.272	145.164	307.843	301.718
33.4	15.8002	16.3682	34.9878	32.0401	51.7198	47.4059	86.0057	84.4858	158.301	145.19	307.879	301.753
33.5	15.8024	16.3705	34.9925	32.0444	51.7289	47.4142	86.0212	84.501	158.328	145.215	307.915	301.789
33.6	15.8046	16.3727	34.9972	32.0487	51.7379	47.4225	86.0366	84.5162	158.356	145.241	307.952	301.825
33.7	15.8067	16.3749	35.002	32.0531	51.747	47.4308	86.0521	84.5314	158.384	145.266	307.988	301.86
33.8	15.8088	16.3771	35.0067	32.0574	51.7561	47.4391	86.0676	84.5466	158.411	145.291	308.024	301.896
33.9	15.8109	16.3793	35.0115	32.0618	51.7651	47.4474	86.083	84.5617	158.439	145.317	308.06	301.931
34	15.8132	16.3816	35.0162	32.0661	51.7742	47.4557	86.0984	84.5769	158.466	145.342	308.096	301.966
34.1	15.8153	16.3838	35.021	32.0705	51.7832	47.464	86.1139	84.5921	158.494	145.367	308.133	302.002
34.2	15.8174	16.386	35.0257	32.0748	51.7923	47.4723	86.1293	84.6072	158.522	145.393	308.168	302.037
34.3	15.8195	16.3882	35.0304	32.0791	51.8013	47.4806	86.1448	84.6224	158.549	145.418	308.204	302.072
34.4	15.8217	16.3904	35.0352	32.0835	51.8104	47.4889	86.1601	84.6375	158.577	145.443	308.24	302.107
34.5	15.8239	16.3927	35.0399	32.0878	51.8194	47.4972	86.1755	84.6526	158.604	145.468	308.275	302.142
34.6	15.826	16.3949	35.0446	32.0921	51.8284	47.5054	86.1909	84.6677	158.631	145.493	308.311	302.177
34.7	15.8281	16.3971	35.0494	32.0965	51.8374	47.5137	86.2062	84.6828	158.658	145.518	308.347	302.212
34.8	15.8302	16.3993	35.0541	32.1008	51.8465	47.522	86.2216	84.6979	158.687	145.544	308.382	302.246
34.9	15.8324	16.4015	35.0589	32.1052	51.8556	47.5303	86.237	84.713	158.714	145.569	308.417	302.281
35	15.8346	16.4038	35.0636	32.1095	51.8646	47.5386	86.2524	84.7281	158.741	145.594	308.452	302.315
35.1	15.8367	16.406	35.0683	32.1138	51.8736	47.5468	86.2677	84.7432	158.768	145.619	308.488	302.35
35.2	15.8388	16.4082	35.0731	32.1182	51.8826	47.5551	86.2831	84.7583	158.796	145.644	308.522	302.384
35.3	15.841	16.4104	35.0778	32.1225	51.8917	47.5634	86.2984	84.7733	158.823	145.669	308.558	302.419
35.4	15.8431	16.4126	35.0825	32.1268	51.9006	47.5716	86.3137	84.7884	158.85	145.694	308.593	302.453
35.5	15.8452	16.4148	35.0873	32.1312	51.9097	47.5799	86.329	84.8034	158.877	145.719	308.627	302.487
35.6	15.8474	16.4171	35.092	32.1355	51.9187	47.5882	86.3444	84.8185	158.904	145.743	308.662	302.521
35.7	15.8496	16.4193	35.0967	32.1398	51.9277	47.5964	86.3597	84.8335	158.931	145.768	308.697	302.555
35.8	15.8517	16.4215	35.1014	32.1441	51.9367	47.6047	86.3749	84.8485	158.958	145.793	308.732	302.589
35.9	15.8538	16.4237	35.1062	32.1485	51.9458	47.613	86.3902	84.8635	158.985	145.818	308.766	302.623
36	15.8559	16.4259	35.1109	32.1528	51.9547	47.6212	86.4055	84.8785	159.013	145.843	308.801	302.657
36.1	15.858	16.4281	35.1156	32.1571	51.9638	47.6295	86.4207	84.8935	159.04	145.868	308.836	302.691
36.2	15.8603	16.4304	35.1204	32.1615	51.9727	47.6377	86.436	84.9085	159.066	145.892	308.87	302.725
36.3	15.8624	16.4326	35.1251	32.1658	51.9818	47.646	86.4513	84.9235	159.093	145.917	308.904	302.758
36.4	15.8645	16.4348	35.1297	32.1701	51.9907	47.6542	86.4665	84.9385	159.121	145.942	308.939	302.792
36.5	15.8666	16.437	35.1344	32.1744	51.9997	47.6624	86.4817	84.9534	159.147	145.966	308.972	302.825
36.6	15.8688	16.4392	35.1392	32.1788	52.0087	47.6707	86.497	84.9684	159.174	145.991	309.007	302.859
36.7	15.8709	16.4414	35.1439	32.1831	52.0177	47.6789	86.5121	84.9833	159.201	146.016	309.041	302.892
36.8	15.8731	16.4437	35.1486	32.1874	52.0267	47.6872	86.5274	84.9983	159.227	146.04	309.074	302.925
36.9	15.8752	16.4459	35.1533	32.1917	52.0357	47.6954	86.5426	85.0132	159.255	146.065	309.108	302.958
37	15.8774	16.4481	35.1581	32.1961	52.0446	47.7036	86.5578	85.0281	159.281	146.089	309.143	302.992
37.1	15.8795	16.4503	35.1628	32.2004	52.0537	47.7119	86.573	85.0431	159.308	146.114	309.176	303.025
37.2	15.8816	16.4525	35.1675	32.2047	52.0626	47.7201	86.5882	85.058	159.334	146.138	309.21	303.058
37.3	15.8837	16.4547	35.1722	32.209	52.0716	47.7283	86.6034	85.0729	159.362	146.163	309.244	303.091
37.4	15.8858	16.4569	35.177	32.2134	52.0805	47.7365	86.6185	85.0878	159.388	146.187	309.276	303.123
37.5	15.8881	16.4592	35.1817	32.2177	52.0896	47.7448	86.6336	85.1026	159.414	146.211	309.31	303.156
37.6	15.8902	16.4614	35.1864	32.222	52.0985	47.753	86.6488	85.1175	159.441	146.236	309.344	303.189
37.7	15.8923	16.4636	35.1911	32.2263	52.1075	47.7612	86.6639	85.1324	159.467	146.26	309.376	303.221
37.8	15.8944	16.4658	35.1958	32.2306	52.1164	47.7694	86.679	85.1472	159.493	146.284	309.41	303.254
37.9	15.8966	16.468	35.2006	32.235	52.1254	47.7776	86.6942	85.1621	159.521	146.309	309.444	303.287
38	15.8987	16.4702	35.2053	32.2393	52.1343	47.7858	86.7092	85.1769	159.547	146.333	309.476	303.319
38.1	15.9008	16.4724	35.21	32.2436	52.1433	47.794	86.7244	85.1918	159.573	146.357	309.509	303.351
38.2	15.903	16.4747	35.2147	32.2479	52.1522	47.8022	86.7395	85.2066	159.599	146.381	309.543	303.384
38.3	15.9052	16.4769	35.2194	32.2522	52.1611	47.8104	86.7545	85.2214	159.626	146.406	309.575	303.416
38.4	15.9073	16.4791	35.2241	32.2565	52.1702	47.8187	86.7696	85.2362	159.653	146.43	309.608	303.448
38.5	15.9094	16.4813	35.2288	32.2608	52.179	47.8268	86.7847	85.251	159.679	146.454	309.641	303.48
38.6	15.9115	16.4835	35.2336	32.2652	52.188	47.835	86.7997	85.2658	159.705	146.478	309.673	303.512
38.7	15.9136	16.4857	35.2383	32.2695	52.1969	47.8432	86.8148	85.2806	159.731	146.502	309.706	303.544
38.8	15.9158	16.4879	35.243	32.2738	52.2059	47.8514	86.8299	85.2954	159.757	146.526	309.739	303.576
38.9	15.918	16.4902	35.2477	32.2781	52.2148	47.8596	86.8449	85.3102	159.783	146.55	309.771	303.608
39	15.9201	16.4924	35.2524	32.2824	52.2238	47.8678	86.8599	85.3249	159.81	146.574	309.803	303.639
39.1	15.9222	16.4946	35.2571	32.2867	52.2327	47.876	86.875	85.3397	159.836	146.598	309.836	303.671
39.2	15.9244	16.4968	35.2618	32.291	52.2417	47.8842	86.8899	85.3544	159.862	146.622	309.868	303.703
39.3	15.9265	16.499	35.2665	32.2953	52.2506	47.8924	86.905	85.3692	159.888	146.646	309.9	303.734
39.4	15.9286	16.5012	35.2713	32.2997	52.2594	47.9005	86.92	85.3839	159.914	146.67	309.932	303.766
39.5	15.9307	16.5034	35.276	32.304	52.2684	47.9087	86.9349	85.3986	159.94	146.694	309.964	303.797
39.6	15.9329	16.5056	35.2807	32.3083	52.2773	47.9169	86.95	85.4134	159.967	146.718	309.996	303.828
39.7	15.935	16.5078	35.2854	32.3126	52.2863	47.9251	86.965	85.4281	159.993	146.742	310.028	303.86
39.8	15.9372	16.5101	35.2901	32.3169	52.2951	47.9332	86.9799	85.4428	160.018	146.765	310.06	303.891
39.9	15.9393	16.5123	35.2948	32.3212	52.3041	47.9414	86.9949	85.4575	160.044	146.789	310.092	303.922
40	15.9414	16.5145	35.2994	32.3255	52.313	47.9496	87.0098	85.4722	160.07	146.813	310.123	303.953
40.1	15.9436	16.5167	35.3041	32.3298	52.3219	47.9577	87.0247	85.4868	160.096	146.837	310.155	303.984
40.2	15.9457	16.5189	35.3088	32.3341	52.3308	47.9659	87.0397	85.5015	160.121	146.86	310.187	304.015
40.3	15.9478	16.5211	35.3135	32.3384	52.3397	47.9741	87.0546	85.5162	160.148	146.884	310.218	304.046
40.4	15.9499	16.5233	35.3182	32.3427	52.3486	47.9822	87.0695	85.5308	160.174	146.908	310.25	304.077
40.5	15.9521	16.5255	35.3229	32.347	52.3575	47.9904	87.0845	85.5455	160.199	146.931	310.28	304.107
40.6	15.9542	16.5277	35.3276	32.3513	52.3664	47.9985	87.0993	85.5601	160.225	146.955	310.312	304.138
40.7	15.9564	16.53	35.3323	32.3556	52.3753	48.0067	87.1142	85.5747	160.25	146.978	310.344	304.169
40.8	15.9585	16.5322	35.337	32.3599	52.3841	48.0148	87.1292	85.5894	160.276	147.002	310.374	304.199
40.9	15.9607	16.5344	35.3417	32.3642	52.3931	48.023	87.144	85.604	160.301	147.025	310.406	304.23
41	15.9628	16.5366	35.3464	32.3685	52.4019	48.0311	87.1589	85.6186	160.328	147.049	310.436	304.26
41.1	15.9649	16.5388	35.3511	32.3728	52.4108	48.0392	87.1737	85.6332	160.353	147.072	310.467	304.29
41.2	15.967	16.541	35.3558	32.3771	52.4197	48.0474	87.1886	85.6478	160.379	147.096	310.499	304.321
41.3	15.9692	16.5432	35.3605	32.3814	52.4286	48.0555	87.2035	85.6624	160.404	147.119	310.529	304.351
41.4	15.9713	16.5454	35.3652	32.3857	52.4375	48.0637	87.2182	85.6769	160.43	147.143	310.56	304.381
41.5	15.9734	16.5476	35.3699	32.39	52.4463	48.0718	87.2331	85.6915	160.455	147.166	310.591	304.411
41.6	15.9755	16.5498	35.3746	32.3943	52.4552	48.0799	87.248	85.7061	160.48	147.189	310.621	304.441
41.7	15.9776	16.552	35.3793	32.3986	52.4641	48.0881	87.2627	85.7206	160.506	147.213	310.652	304.471
41.8	15.9798	16.5542	35.384	32.4029	52.473	48.0962	87.2776	85.7352	160.531	147.236	310.682	304.501
41.9	15.982	16.5565	35.3887	32.4072	52.4818	48.1043	87.2923	85.7497	160.556	147.259	310.713	304.531
42	15.9841	16.5587	35.3934	32.4115	52.4906	48.1124	87.3071	85.7642	160.583	147.283	310.744	304.561
42.1	15.9862	16.5609	35.3981	32.4158	52.4995	48.1205	87.3219	85.7787	160.608	147.306	310.773	304.59
42.2	15.9884	16.5631	35.4027	32.4201	52.5084	48.1287	87.3367	85.7933	160.633	147.329	310.804	304.62
42.3	15.9905	16.5653	35.4074	32.4244	52.5172	48.1368	87.3515	85.8078	160.658	147.352	310.833	304.649
42.4	15.9926	16.5675	35.4121	32.4287	52.5261	48.1449	87.3662	85.8223	160.683	147.375	310.864	304.679
42.5	15.9947	16.5697	35.4167	32.4329	52.5349	48.153	87.381	85.8368	160.708	147.398	310.894	304.708
42.6	15.9969	16.5719	35.4214	32.4372	52.5438	48.1611	87.3957	85.8512	160.734	147.422	310.924	304.738
42.7	15.999	16.5741	35.4261	32.4415	52.5526	48.1692	87.4104	85.8657	160.759	147.445	310.954	304.767
42.8	16.0011	16.5763	35.4308	32.4458	52.5614	48.1773	87.4252	85.8802	160.784	147.468	310.983	304.796
42.9	16.0032	16.5785	35.4355	32.4501	52.5703	48.1854	87.4398	85.8946	160.809	147.491	311.014	304.826
43	16.0053	16.5807	35.4402	32.4544	52.5791	48.1935	87.4546	85.9091	160.835	147.514	311.044	304.855
43.1	16.0075	16.5829	35.4449	32.4587	52.5879	48.2016	87.4693	85.9235	160.86	147.537	311.073	304.884
43.2	16.0096	16.5851	35.4496	32.463	52.5968	48.2097	87.484	85.938	160.885	147.56	311.103	304.913
43.3	16.0117	16.5873	35.4543	32.4673	52.6056	48.2178	87.4987	85.9524	160.91	147.583	311.132	304.942
43.4	16.0139	16.5896	35.4589	32.4715	52.6145	48.2259	87.5133	85.9668	160.934	147.605	311.162	304.971
43.5	16.0161	16.5918	35.4636	32.4758	52.6233	48.234	87.528	85.9812	160.959	147.628	311.19	304.999
43.6	16.0182	16.594	35.4683	32.4801	52.6321	48.2421	87.5427	85.9956	160.984	147.651	311.22	305.028
43.7	16.0203	16.5962	35.473	32.4844	52.641	48.2502	87.5573	86.01	161.009	147.674	311.25	305.057
43.8	16.0224	16.5984	35.4777	32.4887	52.6497	48.2582	87.572	86.0244	161.034	147.697	311.279	305.086
43.9	16.0246	16.6006	35.4824	32.493	52.6585	48.2663	87.5866	86.0388	161.059	147.72	311.308	305.114
44	16.0267	16.6028	35.4869	32.4972	52.6674	48.2744	87.6013	86.0532	161.083	147.742	311.337	305.143
44.1	16.0288	16.605	35.4916	32.5015	52.6762	48.2825	87.6159	86.0675	161.108	147.765	311.366	305.171
44.2	16.0309	16.6072	35.4963	32.5058	52.685	48.2906	87.6305	86.0819	161.133	147.788	311.395	305.199
44.3	16.0331	16.6094	35.501	32.5101	52.6938	48.2986	87.6452	86.0963	161.157	147.81	311.424	305.228
44.4	16.0352	16.6116	35.5057	32.5144	52.7026	48.3067	87.6597	86.1106	161.182	147.833	311.453	305.256
44.5	16.0373	16.6138	35.5103	32.5186	52.7114	48.3148	87.6743	86.1249	161.207	147.856	311.481	305.284
44.6	16.0394	16.616	35.515	32.5229	52.7202	48.3228	87.6889	86.1393	161.231	147.878	311.51	305.312
44.7	16.0415	16.6182	35.5197	32.5272	52.729	48.3309	87.7035	86.1536	161.256	147.901	311.539	305.341
44.8	16.0437	16.6204	35.5244	32.5315	52.7378	48.339	87.7181	86.1679	161.282	147.924	311.568	305.369
44.9	16.0458	16.6226	35.5291	32.5358	52.7466	48.347	87.7326	86.1822	161.306	147.946	311.597	305.397
45	16.0479	16.6248	35.5337	32.54	52.7554	48.3551	87.7472	86.1965	161.331	147.969	311.624	305.424
45.1	16.05	16.627	35.5384	32.5443	52.7641	48.3631	87.7617	86.2108	161.355	147.991	311.653	305.452
45.2	16.0522	16.6292	35.5431	32.5486	52.773	48.3712	87.7763	86.2251	161.38	148.014	311.681	305.48
45.3	16.0543	16.6314	35.5478	32.5529	52.7817	48.3792	87.7907	86.2393	161.404	148.036	311.71	305.508
45.4	16.0564	16.6336	35.5524	32.5571	52.7905	48.3873	87.8053	86.2536	161.428	148.058	311.738	305.536
45.5	16.0585	16.6358	35.557	32.5614	52.7993	48.3953	87.8199	86.2679	161.453	148.081	311.766	305.563
45.6	16.0607	16.638	35.5617	32.5657	52.8081	48.4034	87.8343	86.2821	161.477	148.103	311.794	305.591
45.7	16.0628	16.6402	35.5663	32.5699	52.8168	48.4114	87.8489	86.2964	161.501	148.125	311.822	305.618
45.8	16.0649	16.6424	35.571	32.5742	52.8256	48.4194	87.8633	86.3106	161.526	148.148	311.851	305.646
45.9	16.067	16.6446	35.5757	32.5785	52.8344	48.4275	87.8778	86.3248	161.55	148.17	311.878	305.673
46	16.0692	16.6468	35.5804	32.5828	52.8431	48.4355	87.8922	86.339	161.574	148.192	311.906	305.7
46.1	16.0713	16.649	35.585	32.587	52.8519	48.4435	87.9068	86.3533	161.599	148.215	311.934	305.728
46.2	16.0734	16.6512	35.5897	32.5913	52.8607	48.4516	87.9213	86.3675	161.623	148.237	311.962	305.755
46.3	16.0755	16.6534	35.5944	32.5956	52.8694	48.4596	87.9357	86.3817	161.647	148.259	311.989	305.782
46.4	16.0777	16.6556	35.599	32.5998	52.8782	48.4676	87.9502	86.3959	161.671	148.281	312.017	305.809
46.5	16.0798	16.6578	35.6037	32.6041	52.887	48.4757	87.9645	86.41	161.695	148.303	312.044	305.836
46.6	16.082	16.6601	35.6084	32.6084	52.8957	48.4837	87.979	86.4242	161.72	148.326	312.072	305.863
46.7	16.0841	16.6623	35.613	32.6126	52.9044	48.4917	87.9934	86.4384	161.744	148.348	312.1	305.89
46.8	16.0862	16.6645	35.6177	32.6169	52.9132	48.4997	88.0078	86.4525	161.768	148.37	312.127	305.917
46.9	16.0884	16.6667	35.6224	32.6212	52.9219	48.5077	88.0222	86.4667	161.792	148.392	312.155	305.944
47	16.0905	16.6689	35.6269	32.6254	52.9306	48.5157	88.0366	86.4808	161.816	148.414	312.181	305.97
47.1	16.0926	16.6711	35.6316	32.6297	52.9395	48.5238	88.051	86.495	161.84	148.436	312.209	305.997
47.2	16.0947	16.6733	35.6363	32.634	52.9482	48.5318	88.0654	86.5091	161.864	148.458	312.236	306.024
47.3	16.0969	16.6755	35.6409	32.6382	52.9569	48.5398	88.0798	86.5232	161.888	148.48	312.263	306.05
47.4	16.0989	16.6776	35.6456	32.6425	52.9656	48.5478	88.0941	86.5373	161.912	148.502	312.29	306.077
47.5	16.101	16.6798	35.6503	32.6468	52.9744	48.5558	88.1085	86.5514	161.936	148.524	312.317	306.103
47.6	16.1031	16.682	35.6549	32.651	52.9831	48.5638	88.1228	86.5655	161.96	148.546	312.344	306.13
47.7	16.1053	16.6842	35.6596	32.6553	52.9918	48.5718	88.1372	86.5796	161.983	148.567	312.371	306.156
47.8	16.1074	16.6864	35.6642	32.6595	53.0006	48.5798	88.1515	86.5937	162.007	148.589	312.397	306.182
47.9	16.1095	16.6886	35.6689	32.6638	53.0093	48.5878	88.1659	86.6078	162.031	148.611	312.424	306.208
48	16.1116	16.6908	35.6736	32.6681	53.018	48.5958	88.1802	86.6219	162.055	148.633	312.452	306.235
48.1	16.1138	16.693	35.6782	32.6723	53.0266	48.6037	88.1945	86.6359	162.079	148.655	312.478	306.261
48.2	16.1159	16.6952	35.6828	32.6766	53.0354	48.6117	88.2088	86.65	162.101	148.676	312.505	306.287
48.3	16.118	16.6974	35.6874	32.6808	53.0441	48.6197	88.2231	86.664	162.125	148.698	312.531	306.313
48.4	16.1201	16.6996	35.6921	32.6851	53.0528	48.6277	88.2374	86.6781	162.149	148.72	312.558	306.339
48.5	16.1222	16.7018	35.6967	32.6893	53.0615	48.6357	88.2517	86.6921	162.173	148.742	312.584	306.365
48.6	16.1244	16.704	35.7014	32.6936	53.0703	48.6437	88.2659	86.7061	162.196	148.763	312.611	306.391
48.7	16.1265	16.7062	35.706	32.6978	53.0789	48.6516	88.2802	86.7201	162.22	148.785	312.636	306.416
48.8	16.1286	16.7084	35.7107	32.7021	53.0876	48.6596	88.2944	86.7341	162.243	148.806	312.663	306.442
48.9	16.1307	16.7106	35.7154	32.7064	53.0964	48.6676	88.3087	86.7481	162.267	148.828	312.689	306.468
49	16.1329	16.7128	35.72	32.7106	53.1051	48.6756	88.323	86.7621	162.291	148.85	312.715	306.493
49.1	16.135	16.715	35.7247	32.7149	53.1137	48.6835	88.3372	86.7761	162.314	148.871	312.741	306.519
49.2	16.1371	16.7172	35.7293	32.7191	53.1224	48.6915	88.3515	86.7901	162.338	148.893	312.767	306.544
49.3	16.1392	16.7194	35.734	32.7234	53.131	48.6994	88.3657	86.8041	162.361	148.914	312.793	306.57
49.4	16.1414	16.7216	35.7385	32.7276	53.1398	48.7074	88.3799	86.818	162.385	148.936	312.819	306.595
49.5	16.1435	16.7238	35.7432	32.7319	53.1485	48.7154	88.3941	86.832	162.408	148.957	312.845	306.621
49.6	16.1456	16.726	35.7478	32.7361	53.1571	48.7233	88.4083	86.8459	162.432	148.979	312.871	306.646
49.7	16.1477	16.7282	35.7525	32.7404	53.1658	48.7313	88.4225	86.8599	162.455	149	312.896	306.671
49.8	16.1499	16.7304	35.7571	32.7446	53.1745	48.7392	88.4367	86.8738	162.478	149.021	312.922	306.696
49.9	16.152	16.7326	35.7618	32.7489	53.1832	48.7472	88.4508	86.8877	162.502	149.043	312.948	306.722
50	16.1541	16.7348	35.7664	32.7531	53.1918	48.7551	88.4651	86.9017	162.524	149.064	312.974	306.747
50.1	16.1562	16.737	35.7711	32.7574	53.2005	48.7631	88.4792	86.9156	162.547	149.085	312.999	306.772
50.2	16.1583	16.7392	35.7757	32.7616	53.2092	48.771	88.4934	86.9295	162.571	149.107	313.025	306.797
50.3	16.1605	16.7414	35.7803	32.7658	53.2179	48.779	88.5075	86.9434	162.594	149.128	313.05	306.822
50.4	16.1626	16.7436	35.7849	32.7701	53.2265	48.7869	88.5217	86.9573	162.617	149.149	313.075	306.846
50.5	16.1647	16.7458	35.7895	32.7743	53.2351	48.7948	88.5357	86.9711	162.64	149.17	313.1	306.871
50.6	16.1667	16.7479	35.7942	32.7786	53.2439	48.8028	88.5499	86.985	162.664	149.192	313.126	306.896
50.7	16.1689	16.7501	35.7988	32.7828	53.2525	48.8107	88.564	86.9989	162.687	149.213	313.151	306.921
50.8	16.171	16.7523	35.8035	32.7871	53.2611	48.8186	88.5781	87.0127	162.71	149.234	313.176	306.945
50.9	16.1731	16.7545	35.8081	32.7913	53.2698	48.8266	88.5922	87.0266	162.733	149.255	313.201	306.97
51	16.1752	16.7567	35.8127	32.7955	53.2784	48.8345	88.6063	87.0404	162.756	149.276	313.227	306.995
51.1	16.1774	16.7589	35.8174	32.7998	53.2871	48.8424	88.6204	87.0543	162.779	149.297	313.251	307.019
51.2	16.1795	16.7611	35.822	32.804	53.2957	48.8503	88.6345	87.0681	162.801	149.318	313.276	307.043
51.3	16.1816	16.7633	35.8267	32.8083	53.3044	48.8583	88.6485	87.0819	162.824	149.339	313.301	307.068
51.4	16.1837	16.7655	35.8313	32.8125	53.313	48.8662	88.6626	87.0957	162.847	149.36	313.326	307.092
51.5	16.1859	16.7677	35.8358	32.8167	53.3216	48.8741	88.6767	87.1096	162.87	149.381	313.35	307.116
51.6	16.188	16.7699	35.8405	32.821	53.3303	48.882	88.6907	87.1234	162.893	149.402	313.376	307.141
51.7	16.1901	16.7721	35.8451	32.8252	53.3389	48.8899	88.7047	87.1371	162.916	149.423	313.4	307.165
51.8	16.1922	16.7743	35.8498	32.8295	53.3475	48.8978	88.7187	87.1509	162.939	149.444	313.425	307.189
51.9	16.1944	16.7765	35.8544	32.8337	53.3561	48.9057	88.7328	87.1647	162.962	149.465	313.449	307.213
52	16.1965	16.7787	35.859	32.8379	53.3648	48.9137	88.7468	87.1785	162.985	149.486	313.474	307.237
52.1	16.1985	16.7808	35.8637	32.8422	53.3735	48.9216	88.7608	87.1922	163.007	149.507	313.498	307.261
52.2	16.2006	16.783	35.8683	32.8464	53.3821	48.9295	88.7748	87.206	163.03	149.528	313.523	307.285
52.3	16.2028	16.7852	35.8729	32.8506	53.3907	48.9374	88.7888	87.2197	163.053	149.549	313.547	307.309
52.4	16.2049	16.7874	35.8776	32.8549	53.3993	48.9453	88.8028	87.2335	163.075	149.569	313.572	307.333
52.5	16.207	16.7896	35.8821	32.8591	53.4079	48.9532	88.8168	87.2472	163.098	149.59	313.596	307.357
52.6	16.2091	16.7918	35.8867	32.8633	53.4165	48.961	88.8307	87.2609	163.121	149.611	313.62	307.38
52.7	16.2112	16.794	35.8914	32.8676	53.4251	48.9689	88.8448	87.2747	163.144	149.632	313.644	307.404
52.8	16.2134	16.7962	35.896	32.8718	53.4337	48.9768	88.8587	87.2884	163.166	149.652	313.669	307.428
52.9	16.2155	16.7984	35.9006	32.876	53.4423	48.9847	88.8727	87.3021	163.188	149.673	313.692	307.451
53	16.2176	16.8006	35.9053	32.8803	53.4509	48.9926	88.8866	87.3158	163.211	149.694	313.717	307.475
53.1	16.2197	16.8028	35.9099	32.8845	53.4595	49.0005	88.9006	87.3295	163.233	149.714	313.74	307.498
53.2	16.2219	16.805	35.9145	32.8887	53.4682	49.0084	88.9145	87.3432	163.256	149.735	313.765	307.522
53.3	16.2239	16.8071	35.919	32.8929	53.4767	49.0162	88.9283	87.3568	163.279	149.756	313.788	307.545
53.4	16.226	16.8093	35.9237	32.8972	53.4853	49.0241	88.9423	87.3705	163.301	149.776	313.812	307.568
53.5	16.2281	16.8115	35.9283	32.9014	53.4939	49.032	88.9562	87.3842	163.324	149.797	313.836	307.592
53.6	16.2303	16.8137	35.9329	32.9056	53.5025	49.0399	88.9701	87.3978	163.345	149.817	313.86	307.615
53.7	16.2324	16.8159	35.9375	32.9098	53.511	49.0477	88.984	87.4115	163.368	149.838	313.883	307.638
53.8	16.2345	16.8181	35.9422	32.9141	53.5197	49.0556	88.9979	87.4251	163.39	149.858	313.907	307.661
53.9	16.2366	16.8203	35.9468	32.9183	53.5283	49.0635	89.0117	87.4387	163.413	149.879	313.93	307.684
54	16.2388	16.8225	35.9514	32.9225	53.5368	49.0713	89.0256	87.4523	163.435	149.899	313.953	307.707
54.1	16.2409	16.8247	35.956	32.9267	53.5454	49.0792	89.0395	87.466	163.458	149.92	313.977	307.73
54.2	16.2429	16.8268	35.9607	32.931	53.5539	49.087	89.0534	87.4796	163.48	149.94	314	307.753
54.3	16.245	16.829	35.9652	32.9352	53.5625	49.0949	89.0672	87.4932	163.501	149.96	314.024	307.776
54.4	16.2472	16.8312	35.9698	32.9394	53.5712	49.1028	89.081	87.5068	163.524	149.981	314.047	307.799
54.5	16.2493	16.8334	35.9744	32.9436	53.5797	49.1106	89.0949	87.5204	163.546	150.001	314.071	307.822
54.6	16.2514	16.8356	35.9791	32.9479	53.5883	49.1185	89.1086	87.5339	163.568	150.021	314.093	307.844
54.7	16.2535	16.8378	35.9837	32.9521	53.5968	49.1263	89.1225	87.5475	163.591	150.042	314.117	307.867
54.8	16.2557	16.84	35.9883	32.9563	53.6054	49.1342	89.1363	87.5611	163.613	150.062	314.14	307.89
54.9	16.2578	16.8422	35.9929	32.9605	53.6139	49.142	89.1501	87.5746	163.634	150.082	314.163	307.912
55	16.2599	16.8444	35.9975	32.9647	53.6224	49.1498	89.1639	87.5882	163.657	150.103	314.186	307.935
55.1	16.2619	16.8465	36.0021	32.969	53.6311	49.1577	89.1777	87.6017	163.679	150.123	314.209	307.957
55.2	16.2641	16.8487	36.0067	32.9732	53.6396	49.1655	89.1915	87.6153	163.701	150.143	314.232	307.98
55.3	16.2662	16.8509	36.0113	32.9774	53.6482	49.1734	89.2052	87.6288	163.723	150.163	314.254	308.002
55.4	16.2683	16.8531	36.0159	32.9816	53.6567	49.1812	89.219	87.6423	163.745	150.183	314.277	308.024
55.5	16.2704	16.8553	36.0205	32.9858	53.6652	49.189	89.2327	87.6558	163.766	150.203	314.3	308.047
55.6	16.2725	16.8575	36.0251	32.99	53.6737	49.1968	89.2465	87.6693	163.788	150.223	314.323	308.069
55.7	16.2747	16.8597	36.0297	32.9942	53.6823	49.2047	89.2602	87.6828	163.811	150.244	314.345	308.091
55.8	16.2767	16.8618	36.0344	32.9985	53.6908	49.2125	89.274	87.6963	163.833	150.264	314.368	308.113
55.9	16.2788	16.864	36.0389	33.0027	53.6993	49.2203	89.2877	87.7098	163.855	150.284	314.39	308.135
56	16.2809	16.8662	36.0435	33.0069	53.7079	49.2281	89.3014	87.7233	163.876	150.304	314.413	308.157
56.1	16.2831	16.8684	36.0481	33.0111	53.7165	49.236	89.3152	87.7368	163.898	150.324	314.435	308.179
56.2	16.2852	16.8706	36.0527	33.0153	53.725	49.2438	89.3288	87.7502	163.92	150.344	314.457	308.201
56.3	16.2873	16.8728	36.0573	33.0195	53.7335	49.2516	89.3426	87.7637	163.942	150.364	314.48	308.223
56.4	16.2894	16.875	36.0619	33.0237	53.742	49.2594	89.3562	87.7771	163.963	150.383	314.502	308.245
56.5	16.2916	16.8772	36.0665	33.0279	53.7505	49.2672	89.37	87.7906	163.984	150.403	314.525	308.267
56.6	16.2936	16.8793	36.0712	33.0322	53.759	49.275	89.3836	87.804	164.006	150.423	314.547	308.289
56.7	16.2957	16.8815	36.0757	33.0364	53.7675	49.2828	89.3972	87.8174	164.028	150.443	314.57	308.311
56.8	16.2978	16.8837	36.0803	33.0406	53.776	49.2906	89.4109	87.8308	164.05	150.463	314.591	308.332
56.9	16.3	16.8859	36.0849	33.0448	53.7846	49.2984	89.4246	87.8443	164.072	150.483	314.614	308.354
57	16.3021	16.8881	36.0895	33.049	53.7931	49.3062	89.4383	87.8577	164.093	150.503	314.635	308.375
57.1	16.3042	16.8903	36.0941	33.0532	53.8016	49.314	89.4519	87.8711	164.114	150.522	314.657	308.397
57.2	16.3062	16.8924	36.0987	33.0574	53.8101	49.3218	89.4655	87.8845	164.136	150.542	314.679	308.418
57.3	16.3084	16.8946	36.1033	33.0616	53.8186	49.3296	89.4791	87.8978	164.158	150.562	314.701	308.44
57.4	16.3105	16.8968	36.1079	33.0658	53.8271	49.3374	89.4927	87.9112	164.18	150.582	314.723	308.461
57.5	16.3126	16.899	36.1124	33.07	53.8356	49.3452	89.5064	87.9246	164.2	150.601	314.745	308.483
57.6	16.3147	16.9012	36.117	33.0742	53.8441	49.353	89.52	87.938	164.222	150.621	314.767	308.504
57.7	16.3169	16.9034	36.1216	33.0784	53.8526	49.3608	89.5335	87.9513	164.244	150.641	314.788	308.525
57.8	16.3189	16.9055	36.1262	33.0826	53.8611	49.3686	89.5472	87.9647	164.265	150.66	314.811	308.547
57.9	16.321	16.9077	36.1308	33.0868	53.8695	49.3763	89.5607	87.978	164.286	150.68	314.832	308.568
58	16.3231	16.9099	36.1354	33.091	53.8781	49.3841	89.5743	87.9913	164.307	150.699	314.853	308.589
58.1	16.3253	16.9121	36.14	33.0952	53.8866	49.3919	89.5879	88.0047	164.329	150.719	314.875	308.61
58.2	16.3274	16.9143	36.1445	33.0994	53.8951	49.3997	89.6014	88.018	164.351	150.739	314.896	308.631
58.3	16.3295	16.9165	36.1491	33.1036	53.9035	49.4074	89.615	88.0313	164.371	150.758	314.918	308.652
58.4	16.3315	16.9186	36.1537	33.1078	53.912	49.4152	89.6285	88.0446	164.393	150.778	314.939	308.673
58.5	16.3336	16.9208	36.1583	33.112	53.9205	49.423	89.6421	88.0579	164.414	150.797	314.96	308.694
58.6	16.3358	16.923	36.1629	33.1162	53.9289	49.4307	89.6556	88.0712	164.436	150.817	314.982	308.715
58.7	16.3379	16.9252	36.1675	33.1204	53.9374	49.4385	89.6691	88.0845	164.456	150.836	315.003	308.736
58.8	16.34	16.9274	36.1721	33.1246	53.9459	49.4463	89.6827	88.0978	164.477	150.855	315.024	308.756
58.9	16.3421	16.9296	36.1766	33.1288	53.9543	49.454	89.6961	88.111	164.499	150.875	315.045	308.777
59	16.3442	16.9317	36.1812	33.133	53.9628	49.4618	89.7097	88.1243	164.52	150.894	315.067	308.798
59.1	16.3463	16.9339	36.1858	33.1372	53.9712	49.4695	89.7231	88.1375	164.542	150.914	315.087	308.818
59.2	16.3484	16.9361	36.1904	33.1414	53.9797	49.4773	89.7366	88.1508	164.562	150.933	315.108	308.839
59.3	16.3505	16.9383	36.195	33.1456	53.9881	49.485	89.7501	88.164	164.583	150.952	315.13	308.86
59.4	16.3527	16.9405	36.1996	33.1498	53.9966	49.4928	89.7636	88.1773	164.605	150.972	315.15	308.88
59.5	16.3547	16.9426	36.2042	33.154	54.005	49.5005	89.777	88.1905	164.625	150.991	315.172	308.901
59.6	16.3568	16.9448	36.2088	33.1582	54.0136	49.5083	89.7905	88.2037	164.646	151.01	315.192	308.921
59.7	16.3589	16.947	36.2133	33.1624	54.022	49.516	89.8039	88.2169	164.667	151.029	315.213	308.941
59.8	16.3611	16.9492	36.2178	33.1665	54.0305	49.5238	89.8174	88.2301	164.689	151.049	315.234	308.962
59.9	16.3632	16.9514	36.2224	33.1707	54.0389	49.5315	89.8308	88.2433	164.709	151.068	315.254	308.982
60	16.3652	16.9535	36.227	33.1749	54.0474	49.5393	89.8442	88.2565	164.73	151.087	315.275	309.002
60.1	16.3673	16.9557	2.85549	2.61492	5.48691	5.02925	9.48412	9.31652	17.5395	16.0869	315.295	309.022
60.2	1.28938	1.33573	2.85548	2.61491	5.4869	5.02924	9.48409	9.31649	17.5394	16.0868	25.1222	24.6224
60.3	1.28937	1.33572	2.85547	2.6149	5.48688	5.02922	9.48406	9.31646	17.5394	16.0868	25.1221	24.6223
60.4	1.28937	1.33572	2.85547	2.6149	5.48686	5.0292	9.48403	9.31643	17.5393	16.0867	25.1221	24.6223
60.5	1.28936	1.33571	2.85546	2.61489	5.48685	5.02919	9.484	9.3164	17.5393	16.0867	25.122	24.6222
60.6	1.28936	1.33571	2.85545	2.61488	5.48682	5.02917	9.48397	9.31637	17.5392	16.0866	25.1219	24.6221
60.7	1.28935	1.3357	2.85544	2.61487	5.48681	5.02916	9.48394	9.31634	17.5392	16.0866	25.1218	24.622
60.8	1.28935	1.3357	2.85543	2.61486	5.48679	5.02914	9.48391	9.31631	17.5391	16.0865	25.1217	24.6219
60.9	1.28934	1.33569	2.85542	2.61485	5.48677	5.02912	9.48388	9.31628	17.5391	16.0865	25.1217	24.6219
61	1.28934	1.33569	2.85542	2.61485	5.48676	5.02911	9.48385	9.31625	17.539	16.0864	25.1216	24.6218
61.1	1.28934	1.33569	2.85541	2.61484	5.48674	5.02909	9.48382	9.31622	17.539	16.0864	25.1215	24.6217
61.2	1.28933	1.33568	2.85539	2.61483	5.48672	5.02907	9.48379	9.31619	17.5389	16.0863	25.1214	24.6216
61.3	1.28933	1.33568	2.85538	2.61482	5.4867	5.02906	9.48376	9.31616	17.5389	16.0863	25.1213	24.6215
61.4	1.28932	1.33567	2.85537	2.61481	5.48668	5.02904	9.48373	9.31613	17.5388	16.0862	25.1213	24.6215
61.5	1.28932	1.33567	2.85536	2.6148	5.48667	5.02903	9.4837	9.3161	17.5388	16.0862	25.1212	24.6214
61.6	1.28931	1.33566	2.85535	2.61479	5.48665	5.02901	9.48367	9.31607	17.5387	16.0861	25.1211	24.6213
61.7	1.28931	1.33566	2.85535	2.61479	5.48663	5.02899	9.48364	9.31604	17.5387	16.0861	25.121	24.6212
61.8	1.28931	1.33566	2.85534	2.61478	5.48662	5.02898	9.48361	9.31601	17.5386	16.086	25.1209	24.6211
61.9	1.2893	1.33565	2.85533	2.61477	5.4866	5.02896	9.48357	9.31598	17.5386	16.086	25.1209	24.6211
62	1.2893	1.33565	2.85532	2.61476	5.48657	5.02894	9.48354	9.31595	17.5385	16.0859	25.1208	24.621
62.1	1.28929	1.33564	2.85531	2.61475	5.48656	5.02893	9.48351	9.31592	17.5385	16.0859	25.1207	24.6209
62.2	1.28929	1.33564	2.8553	2.61474	5.48654	5.02891	9.48348	9.31589	17.5383	16.0858	25.1206	24.6208
62.3	1.28928	1.33563	2.8553	2.61474	5.48653	5.0289	9.48345	9.31586	17.5383	16.0858	25.1205	24.6207
62.4	1.28928	1.33563	2.85529	2.61473	5.48651	5.02888	9.48342	9.31583	17.5382	16.0857	25.1205	24.6207
62.5	1.28928	1.33563	2.85527	2.61472	5.48649	5.02886	9.48339	9.3158	17.5381	16.0856	25.1204	24.6206
62.6	1.28927	1.33562	2.85526	2.61471	5.48648	5.02885	9.48336	9.31577	17.5381	16.0856	25.1203	24.6205
62.7	1.28927	1.33562	2.85525	2.6147	5.48645	5.02883	9.48333	9.31574	17.538	16.0855	25.1202	24.6204
62.8	1.28926	1.33561	2.85524	2.61469	5.48643	5.02881	9.4833	9.31571	17.538	16.0855	25.1201	24.6203
62.9	1.28926	1.33561	2.85524	2.61469	5.48642	5.0288	9.48327	9.31568	17.5379	16.0854	25.1201	24.6203
63	1.28925	1.3356	2.85523	2.61468	5.4864	5.02878	9.48324	9.31565	17.5379	16.0854	25.12	24.6202
63.1	1.28925	1.3356	2.85522	2.61467	5.48639	5.02877	9.48321	9.31562	17.5378	16.0853	25.1199	24.6201
63.2	1.28925	1.3356	2.85521	2.61466	5.48637	5.02875	9.48318	9.31559	17.5378	16.0853	25.1198	24.62
63.3	1.28925	1.33559	2.8552	2.61465	5.48634	5.02873	9.48315	9.31556	17.5377	16.0852	25.1198	24.62
63.4	1.28925	1.33559	2.85519	2.61464	5.48633	5.02872	9.48312	9.31553	17.5377	16.0852	25.1197	24.6199
63.5	1.28924	1.33558	2.85518	2.61463	5.48631	5.0287	9.48309	9.3155	17.5376	16.0851	25.1196	24.6198
63.6	1.28924	1.33558	2.85518	2.61463	5.48629	5.02868	9.48306	9.31547	17.5376	16.0851	25.1195	24.6197
63.7	1.28923	1.33557	2.85517	2.61462	5.48628	5.02867	9.48302	9.31544	17.5375	16.085	25.1194	24.6196
63.8	1.28923	1.33557	2.85515	2.61461	5.48626	5.02865	9.48299	9.31541	17.5375	16.085	25.1194	24.6196
63.9	1.28923	1.33557	2.85514	2.6146	5.48625	5.02864	9.48296	9.31538	17.5374	16.0849	25.1193	24.6195
64	1.28922	1.33556	2.85513	2.61459	5.48622	5.02862	9.48293	9.31535	17.5374	16.0849	25.1192	24.6194
64.1	1.28922	1.33556	2.85512	2.61458	5.4862	5.0286	9.4829	9.31532	17.5373	16.0848	25.1191	24.6193
64.2	1.28921	1.33555	2.85512	2.61458	5.48619	5.02859	9.48287	9.31529	17.5373	16.0848	25.119	24.6192
64.3	1.28921	1.33555	2.85511	2.61457	5.48617	5.02857	9.48284	9.31526	17.5371	16.0847	25.119	24.6192
64.4	1.2892	1.33554	2.8551	2.61456	5.48615	5.02855	9.48281	9.31523	17.5371	16.0847	25.1189	24.6191
64.5	1.2892	1.33554	2.85509	2.61455	5.48614	5.02854	9.48278	9.3152	17.537	16.0846	25.1188	24.619
64.6	1.2892	1.33554	2.85508	2.61454	5.48612	5.02852	9.48275	9.31517	17.537	16.0846	25.1187	24.6189
64.7	1.28919	1.33553	2.85507	2.61453	5.4861	5.02851	9.48272	9.31514	17.5369	16.0845	25.1186	24.6188
64.8	1.28919	1.33553	2.85506	2.61452	5.48608	5.02849	9.48269	9.31511	17.5369	16.0845	25.1186	24.6188
64.9	1.28918	1.33552	2.85506	2.61452	5.48606	5.02847	9.48266	9.31508	17.5368	16.0844	25.1185	24.6187
65	1.28918	1.33552	2.85504	2.61451	5.48605	5.02846	9.48263	9.31505	17.5367	16.0843	25.1184	24.6186
65.1	1.28917	1.33551	2.85503	2.6145	5.48603	5.02844	9.4826	9.31502	17.5367	16.0843	25.1183	24.6185
65.2	1.28917	1.33551	2.85502	2.61449	5.48601	5.02842	9.48257	9.31499	17.5366	16.0842	25.1182	24.6184
65.3	1.28917	1.33551	2.85501	2.61448	5.486	5.02841	9.48254	9.31496	17.5366	16.0842	25.1182	24.6184
65.4	1.28916	1.3355	2.855	2.61447	5.48597	5.02839	9.48251	9.31493	17.5365	16.0841	25.1181	24.6183
65.5	1.28916	1.3355	2.855	2.61447	5.48596	5.02838	9.48248	9.3149	17.5365	16.0841	25.1179	24.6182
65.6	1.28915	1.33549	2.85499	2.61446	5.48594	5.02836	9.48244	9.31487	17.5364	16.084	25.1178	24.6181
65.7	1.28915	1.33549	2.85498	2.61445	5.48592	5.02834	9.48241	9.31484	17.5364	16.084	25.1177	24.618
65.8	1.28914	1.33548	2.85497	2.61444	5.48591	5.02833	9.48238	9.31481	17.5363	16.0839	25.1177	24.618
65.9	1.28914	1.33548	2.85496	2.61443	5.48589	5.02831	9.48235	9.31478	17.5363	16.0839	25.1176	24.6179
66	1.28913	1.33547	2.85495	2.61442	5.48586	5.02829	9.48232	9.31475	17.5362	16.0838	25.1175	24.6178
66.1	1.28913	1.33547	2.85494	2.61441	5.48585	5.02828	9.48229	9.31472	17.5362	16.0838	25.1174	24.6177
66.2	1.28913	1.33547	2.85494	2.61441	5.48583	5.02826	9.48226	9.31469	17.5361	16.0837	25.1173	24.6176
66.3	1.28912	1.33546	2.85492	2.6144	5.48582	5.02825	9.48223	9.31466	17.5361	16.0837	25.1173	24.6176
66.4	1.28912	1.33546	2.85491	2.61439	5.4858	5.02823	9.4822	9.31463	17.5359	16.0836	25.1172	24.6175
66.5	1.28911	1.33545	2.8549	2.61438	5.48578	5.02821	9.48217	9.3146	17.5359	16.0836	25.1171	24.6174
66.6	1.28911	1.33545	2.85489	2.61437	5.48577	5.0282	9.48214	9.31457	17.5358	16.0835	25.117	24.6173
66.7	1.2891	1.33544	2.85488	2.61436	5.48574	5.02818	9.48211	9.31454	17.5358	16.0835	25.1169	24.6172
66.8	1.2891	1.33544	2.85488	2.61436	5.48572	5.02816	9.48208	9.31451	17.5357	16.0834	25.1169	24.6172
66.9	1.2891	1.33544	2.85487	2.61435	5.48571	5.02815	9.48205	9.31448	17.5357	16.0834	25.1168	24.6171
67	1.28909	1.33543	2.85486	2.61434	5.48569	5.02813	9.48202	9.31445	17.5356	16.0833	25.1167	24.617
67.1	1.28909	1.33543	2.85485	2.61433	5.48568	5.02812	9.48199	9.31442	17.5356	16.0833	25.1166	24.6169
67.2	1.28908	1.33542	2.85484	2.61432	5.48566	5.0281	9.48196	9.31439	17.5355	16.0832	25.1166	24.6169
67.3	1.28908	1.33542	2.85483	2.61431	5.48564	5.02808	9.48193	9.31436	17.5355	16.0832	25.1165	24.6168
67.4	1.28907	1.33541	2.85483	2.61431	5.48562	5.02807	9.48189	9.31433	17.5354	16.0831	25.1164	24.6167
67.5	1.28907	1.33541	2.85482	2.6143	5.4856	5.02805	9.48186	9.3143	17.5354	16.0831	25.1163	24.6166
67.6	1.28907	1.33541	2.8548	2.61429	5.48558	5.02803	9.48183	9.31427	17.5353	16.083	25.1162	24.6165
67.7	1.28906	1.3354	2.85479	2.61428	5.48557	5.02802	9.4818	9.31424	17.5352	16.0829	25.1162	24.6165
67.8	1.28906	1.3354	2.85478	2.61427	5.48555	5.028	9.48177	9.31421	17.5352	16.0829	25.1161	24.6164
67.9	1.28905	1.33539	2.85477	2.61426	5.48554	5.02799	9.48174	9.31418	17.5351	16.0828	25.116	24.6163
68	1.28905	1.33539	2.85476	2.61425	5.48552	5.02797	9.48171	9.31415	17.5351	16.0828	25.1159	24.6162
68.1	1.28904	1.33538	2.85476	2.61425	5.48549	5.02795	9.48168	9.31412	17.535	16.0827	25.1158	24.6161
68.2	1.28904	1.33538	2.85475	2.61424	5.48548	5.02794	9.48165	9.31409	17.535	16.0827	25.1158	24.6161
68.3	1.28904	1.33538	2.85474	2.61423	5.48546	5.02792	9.48162	9.31406	17.5349	16.0826	25.1157	24.616
68.4	1.28903	1.33537	2.85473	2.61422	5.48545	5.02791	9.48159	9.31403	17.5349	16.0826	25.1156	24.6159
68.5	1.28903	1.33537	2.85472	2.61421	5.48543	5.02789	9.48156	9.314	17.5347	16.0825	25.1155	24.6158
68.6	1.28902	1.33536	2.85471	2.6142	5.48541	5.02787	9.48153	9.31397	17.5347	16.0825	25.1154	24.6157
68.7	1.28902	1.33536	2.85471	2.6142	5.4854	5.02786	9.4815	9.31394	17.5346	16.0824	25.1154	24.6157
68.8	1.28901	1.33535	2.8547	2.61419	5.48537	5.02784	9.48147	9.31391	17.5346	16.0824	25.1153	24.6156
68.9	1.28901	1.33535	2.85468	2.61418	5.48535	5.02782	9.48144	9.31388	17.5345	16.0823	25.1152	24.6155
69	1.28901	1.33535	2.85467	2.61417	5.48534	5.02781	9.48141	9.31385	17.5345	16.0823	25.1151	24.6154
69.1	1.289	1.33534	2.85466	2.61416	5.48532	5.02779	9.48138	9.31382	17.5344	16.0822	25.115	24.6153
69.2	1.289	1.33534	2.85465	2.61415	5.48531	5.02778	9.48135	9.31379	17.5344	16.0822	25.115	24.6153
69.3	1.28899	1.33533	2.85464	2.61414	5.48529	5.02776	9.48131	9.31376	17.5343	16.0821	25.1149	24.6152
69.4	1.28899	1.33533	2.85464	2.61414	5.48526	5.02774	9.48128	9.31373	17.5343	16.0821	25.1148	24.6151
69.5	1.28898	1.33532	2.85463	2.61413	5.48525	5.02773	9.48124	9.31369	17.5342	16.082	25.1147	24.615
69.6	1.28898	1.33532	2.85462	2.61412	5.48523	5.02771	9.48121	9.31366	17.5342	16.082	25.1146	24.6149
69.7	1.28898	1.33532	2.85461	2.61411	5.48521	5.02769	9.48118	9.31363	17.5341	16.0819	25.1146	24.6149
69.8	1.28897	1.33531	2.8546	2.6141	5.4852	5.02768	9.48115	9.3136	17.5341	16.0819	25.1145	24.6148
69.9	1.28897	1.33531	2.85459	2.61409	5.48518	5.02766	9.48112	9.31357	17.534	16.0818	25.1144	24.6147
70	1.28897	1.3353	2.85459	2.61409	5.48517	5.02765	9.48109	9.31354	17.534	16.0818	25.1143	24.6146
70.1	1.28897	1.3353	2.85458	2.61408	5.48514	5.02763	9.48106	9.31351	17.5339	16.0817	25.1142	24.6145
70.2	1.28896	1.33529	2.85456	2.61407	5.48512	5.02761	9.48103	9.31348	17.5338	16.0816	25.1142	24.6145
70.3	1.28896	1.33529	2.85455	2.61406	5.48511	5.0276	9.481	9.31345	17.5338	16.0816	25.1141	24.6144
70.4	1.28896	1.33529	2.85454	2.61405	5.48509	5.02758	9.48097	9.31342	17.5337	16.0815	25.114	24.6143
70.5	1.28895	1.33528	2.85453	2.61404	5.48507	5.02756	9.48094	9.31339	17.5337	16.0815	25.1139	24.6142
70.6	1.28895	1.33528	2.85453	2.61404	5.48506	5.02755	9.48091	9.31336	17.5336	16.0814	25.1138	24.6141
70.7	1.28894	1.33527	2.85452	2.61403	5.48504	5.02753	9.48088	9.31333	17.5336	16.0814	25.1138	24.6141
70.8	1.28894	1.33527	2.85451	2.61402	5.48502	5.02752	9.48085	9.3133	17.5334	16.0813	25.1137	24.614
70.9	1.28893	1.33526	2.8545	2.61401	5.485	5.0275	9.48082	9.31327	17.5334	16.0813	25.1136	24.6139
71	1.28893	1.33526	2.85449	2.614	5.48498	5.02748	9.48079	9.31324	17.5333	16.0812	25.1135	24.6138
71.1	1.28893	1.33526	2.85448	2.61399	5.48497	5.02747	9.48075	9.31321	17.5333	16.0812	25.1135	24.6138
71.2	1.28892	1.33525	2.85447	2.61398	5.48495	5.02745	9.48072	9.31318	17.5332	16.0811	25.1134	24.6137
71.3	1.28892	1.33525	2.85447	2.61398	5.48493	5.02743	9.48069	9.31315	17.5332	16.0811	25.1133	24.6136
71.4	1.28891	1.33524	2.85446	2.61397	5.48492	5.02742	9.48066	9.31312	17.5331	16.081	25.1132	24.6135
71.5	1.28891	1.33524	2.85444	2.61396	5.48489	5.0274	9.48063	9.31309	17.5331	16.081	25.1131	24.6134
71.6	1.2889	1.33523	2.85443	2.61395	5.48488	5.02739	9.4806	9.31306	17.533	16.0809	25.1131	24.6134
71.7	1.2889	1.33523	2.85442	2.61394	5.48486	5.02737	9.48057	9.31303	17.533	16.0809	25.1129	24.6133
71.8	1.28889	1.33522	2.85441	2.61393	5.48484	5.02735	9.48054	9.313	17.5329	16.0808	25.1128	24.6132
71.9	1.28889	1.33522	2.85441	2.61393	5.48483	5.02734	9.48051	9.31297	17.5329	16.0808	25.1127	24.6131
72	1.28889	1.33522	2.8544	2.61392	5.48481	5.02732	9.48048	9.31294	17.5328	16.0807	25.1126	24.613
72.1	1.28888	1.33521	2.85439	2.61391	5.48478	5.0273	9.48045	9.31291	17.5328	16.0807	25.1126	24.613
72.2	1.28888	1.33521	2.85438	2.6139	5.48477	5.02729	9.48042	9.31288	17.5327	16.0806	25.1125	24.6129
72.3	1.28887	1.3352	2.85437	2.61389	5.48475	5.02727	9.48039	9.31285	17.5327	16.0806	25.1124	24.6128
72.4	1.28887	1.3352	2.85436	2.61388	5.48474	5.02726	9.48036	9.31282	17.5326	16.0805	25.1123	24.6127
72.5	1.28886	1.33519	2.85435	2.61387	5.48472	5.02724	9.48033	9.31279	17.5326	16.0805	25.1122	24.6126
72.6	1.28886	1.33519	2.85435	2.61387	5.4847	5.02722	9.4803	9.31276	17.5325	16.0804	25.1122	24.6126
72.7	1.28886	1.33519	2.85434	2.61386	5.48469	5.02721	9.48027	9.31273	17.5325	16.0804	25.1121	24.6125
72.8	1.28885	1.33518	2.85432	2.61385	5.48466	5.02719	9.48024	9.3127	17.5324	16.0803	25.112	24.6124
72.9	1.28885	1.33518	2.85431	2.61384	5.48464	5.02717	9.4802	9.31267	17.5322	16.0802	25.1119	24.6123
73	1.28884	1.33517	2.8543	2.61383	5.48463	5.02716	9.48017	9.31264	17.5322	16.0802	25.1118	24.6122
73.1	1.28884	1.33517	2.85429	2.61382	5.48461	5.02714	9.48014	9.31261	17.5321	16.0801	25.1118	24.6122
73.2	1.28883	1.33516	2.85429	2.61382	5.4846	5.02713	9.48011	9.31258	17.5321	16.0801	25.1117	24.6121
73.3	1.28883	1.33516	2.85428	2.61381	5.48458	5.02711	9.48008	9.31255	17.532	16.08	25.1116	24.612
73.4	1.28883	1.33516	2.85427	2.6138	5.48456	5.02709	9.48005	9.31252	17.532	16.08	25.1115	24.6119
73.5	1.28882	1.33515	2.85426	2.61379	5.48454	5.02708	9.48002	9.31249	17.5319	16.0799	25.1114	24.6118
73.6	1.28882	1.33515	2.85425	2.61378	5.48452	5.02706	9.47999	9.31246	17.5319	16.0799	25.1114	24.6118
73.7	1.28881	1.33514	2.85424	2.61377	5.4845	5.02704	9.47996	9.31243	17.5318	16.0798	25.1113	24.6117
73.8	1.28881	1.33514	2.85424	2.61377	5.48449	5.02703	9.47993	9.3124	17.5318	16.0798	25.1112	24.6116
73.9	1.2888	1.33513	2.85423	2.61376	5.48447	5.02701	9.4799	9.31237	17.5317	16.0797	25.1111	24.6115
74	1.2888	1.33513	2.85422	2.61375	5.48446	5.027	9.47987	9.31234	17.5317	16.0797	25.111	24.6114
74.1	1.2888	1.33513	2.8542	2.61374	5.48444	5.02698	9.47984	9.31231	17.5316	16.0796	25.111	24.6114
74.2	1.28879	1.33512	2.85419	2.61373	5.48441	5.02696	9.47981	9.31228	17.5316	16.0796	25.1109	24.6113
74.3	1.28879	1.33512	2.85418	2.61372	5.4844	5.02695	9.47978	9.31225	17.5315	16.0795	25.1108	24.6112
74.4	1.28878	1.33511	2.85417	2.61371	5.48438	5.02693	9.47975	9.31222	17.5315	16.0795	25.1107	24.6111
74.5	1.28878	1.33511	2.85417	2.61371	5.48436	5.02691	9.47972	9.31219	17.5314	16.0794	25.1106	24.611
74.6	1.28877	1.3351	2.85416	2.6137	5.48435	5.0269	9.47969	9.31216	17.5314	16.0794	25.1106	24.611
74.7	1.28877	1.3351	2.85415	2.61369	5.48433	5.02688	9.47966	9.31213	17.5313	16.0793	25.1105	24.6109
74.8	1.28877	1.3351	2.85414	2.61368	5.48432	5.02687	9.47962	9.3121	17.5313	16.0793	25.1104	24.6108
74.9	1.28876	1.33509	2.85413	2.61367	5.48429	5.02685	9.47959	9.31207	17.5312	16.0792	25.1103	24.6107
75	1.28876	1.33509	2.85412	2.61366	5.48427	5.02683	9.47956	9.31204	17.5312	16.0792	25.1103	24.6107
75.1	1.28875	1.33508	2.85412	2.61366	5.48426	5.02682	9.47953	9.31201	17.531	16.0791	25.1102	24.6106
75.2	1.28875	1.33508	2.85411	2.61365	5.48424	5.0268	9.4795	9.31198	17.531	16.0791	25.1101	24.6105
75.3	1.28874	1.33507	2.85409	2.61364	5.48422	5.02678	9.47947	9.31195	17.5309	16.079	25.11	24.6104
75.4	1.28874	1.33507	2.85408	2.61363	5.48421	5.02677	9.47944	9.31192	17.5308	16.0789	25.1099	24.6103
75.5	1.28874	1.33507	2.85407	2.61362	5.48418	5.02675	9.47941	9.31189	17.5308	16.0789	25.1099	24.6103
75.6	1.28873	1.33506	2.85406	2.61361	5.48417	5.02674	9.47938	9.31186	17.5307	16.0788	25.1098	24.6102
75.7	1.28873	1.33506	2.85405	2.6136	5.48415	5.02672	9.47935	9.31183	17.5307	16.0788	25.1097	24.6101
75.8	1.28872	1.33505	2.85405	2.6136	5.48413	5.0267	9.47932	9.3118	17.5306	16.0787	25.1096	24.61
75.9	1.28872	1.33505	2.85404	2.61359	5.48412	5.02669	9.47929	9.31177	17.5306	16.0787	25.1095	24.6099
76	1.28871	1.33504	2.85403	2.61358	5.4841	5.02667	9.47926	9.31174	17.5305	16.0786	25.1095	24.6099
76.1	1.28871	1.33504	2.85402	2.61357	5.48409	5.02666	9.47923	9.31171	17.5305	16.0786	25.1094	24.6098
76.2	1.28871	1.33504	2.85401	2.61356	5.48406	5.02664	9.4792	9.31168	17.5304	16.0785	25.1093	24.6097
76.3	1.2887	1.33503	2.854	2.61355	5.48404	5.02662	9.47917	9.31165	17.5304	16.0785	25.1092	24.6096
76.4	1.2887	1.33503	2.854	2.61355	5.48403	5.02661	9.47914	9.31162	17.5303	16.0784	25.1091	24.6095
76.5	1.28869	1.33502	2.85399	2.61354	5.48401	5.02659	9.47911	9.31159	17.5303	16.0784	25.1091	24.6095
76.6	1.28869	1.33502	2.85397	2.61353	5.48399	5.02657	9.47907	9.31156	17.5302	16.0783	25.109	24.6094
76.7	1.28869	1.33501	2.85396	2.61352	5.48398	5.02656	9.47904	9.31153	17.5302	16.0783	25.1089	24.6093
76.8	1.28869	1.33501	2.85395	2.61351	5.48396	5.02654	9.47901	9.3115	17.5301	16.0782	25.1088	24.6092
76.9	1.28869	1.33501	2.85394	2.6135	5.48394	5.02653	9.47898	9.31147	17.5301	16.0782	25.1087	24.6091
77	1.28868	1.335	2.85393	2.61349	5.48392	5.02651	9.47895	9.31144	17.53	16.0781	25.1087	24.6091
77.1	1.28868	1.335	2.85393	2.61349	5.4839	5.02649	9.47892	9.31141	17.53	16.0781	25.1086	24.609
77.2	1.28867	1.33499	2.85392	2.61348	5.48389	5.02648	9.47889	9.31138	17.5298	16.078	25.1085	24.6089
77.3	1.28867	1.33499	2.85391	2.61347	5.48387	5.02646	9.47886	9.31135	17.5298	16.078	25.1084	24.6088
77.4	1.28866	1.33498	2.8539	2.61346	5.48385	5.02644	9.47883	9.31132	17.5297	16.0779	25.1083	24.6087
77.5	1.28866	1.33498	2.85389	2.61345	5.48384	5.02643	9.4788	9.31129	17.5297	16.0779	25.1083	24.6087
77.6	1.28865	1.33497	2.85388	2.61344	5.48381	5.02641	9.47877	9.31126	17.5296	16.0778	25.1082	24.6086
77.7	1.28865	1.33497	2.85388	2.61344	5.4838	5.0264	9.47874	9.31123	17.5296	16.0778	25.1081	24.6085
77.8	1.28865	1.33497	2.85387	2.61343	5.48378	5.02638	9.47871	9.3112	17.5295	16.0777	25.108	24.6084
77.9	1.28864	1.33496	2.85385	2.61342	5.48376	5.02636	9.47868	9.31117	17.5295	16.0777	25.1078	24.6083
78	1.28864	1.33496	2.85384	2.61341	5.48375	5.02635	9.47865	9.31114	17.5294	16.0776	25.1078	24.6083
78.1	1.28863	1.33495	2.85383	2.6134	5.48373	5.02633	9.47862	9.31111	17.5293	16.0775	25.1077	24.6082
78.2	1.28863	1.33495	2.85382	2.61339	5.4837	5.02631	9.47859	9.31108	17.5293	16.0775	25.1076	24.6081
78.3	1.28862	1.33494	2.85382	2.61339	5.48369	5.0263	9.47856	9.31105	17.5292	16.0774	25.1075	24.608
78.4	1.28862	1.33494	2.85381	2.61338	5.48367	5.02628	9.47853	9.31102	17.5292	16.0774	25.1074	24.6079
78.5	1.28862	1.33494	2.8538	2.61337	5.48366	5.02627	9.47849	9.31099	17.5291	16.0773	25.1074	24.6079
78.6	1.28861	1.33493	2.85379	2.61336	5.48364	5.02625	9.47846	9.31096	17.5291	16.0773	25.1073	24.6078
78.7	1.28861	1.33493	2.85378	2.61335	5.48362	5.02623	9.47843	9.31093	17.529	16.0772	25.1072	24.6077
78.8	1.2886	1.33492	2.85377	2.61334	5.48361	5.02622	9.4784	9.3109	17.529	16.0772	25.1071	24.6076
78.9	1.2886	1.33492	2.85376	2.61333	5.48358	5.0262	9.47837	9.31087	17.5289	16.0771	25.1071	24.6076
79	1.28859	1.33491	2.85376	2.61333	5.48356	5.02618	9.47834	9.31084	17.5289	16.0771	25.107	24.6075
79.1	1.28859	1.33491	2.85375	2.61332	5.48355	5.02617	9.47831	9.31081	17.5288	16.077	25.1069	24.6074
79.2	1.28859	1.33491	2.85373	2.61331	5.48353	5.02615	9.47828	9.31078	17.5288	16.077	25.1068	24.6073
79.3	1.28858	1.3349	2.85372	2.6133	5.48352	5.02614	9.47825	9.31075	17.5286	16.0769	25.1067	24.6072
79.4	1.28858	1.3349	2.85371	2.61329	5.4835	5.02612	9.47822	9.31072	17.5286	16.0769	25.1067	24.6072
79.5	1.28857	1.33489	2.8537	2.61328	5.48348	5.0261	9.47819	9.31069	17.5285	16.0768	25.1066	24.6071
79.6	1.28857	1.33489	2.8537	2.61328	5.48346	5.02609	9.47816	9.31066	17.5285	16.0768	25.1065	24.607
79.7	1.28856	1.33488	2.85369	2.61327	5.48344	5.02607	9.47813	9.31063	17.5284	16.0767	25.1064	24.6069
79.8	1.28856	1.33488	2.85368	2.61326	5.48342	5.02605	9.4781	9.3106	17.5284	16.0767	25.1063	24.6068
79.9	1.28856	1.33488	2.85367	2.61325	5.48341	5.02604	9.47807	9.31057	17.5283	16.0766	25.1063	24.6068
80	1.28855	1.33487	2.85366	2.61324	5.48339	5.02602	9.47804	9.31054	17.5283	16.0766	25.1062	24.6067
80.1	1.28855	1.33487	2.85365	2.61323	5.48338	5.02601	9.47801	9.31051	17.5282	16.0765	25.1061	24.6066
80.2	1.28854	1.33486	2.85364	2.61322	5.48336	5.02599	9.47798	9.31048	17.5282	16.0765	25.106	24.6065
80.3	1.28854	1.33486	2.85364	2.61322	5.48333	5.02597	9.47794	9.31045	17.5281	16.0764	25.1059	24.6064
80.4	1.28853	1.33485	2.85363	2.61321	5.48332	5.02596	9.47791	9.31042	17.5281	16.0764	25.1059	24.6064
80.5	1.28853	1.33485	2.85361	2.6132	5.4833	5.02594	9.47788	9.31039	17.528	16.0763	25.1058	24.6063
80.6	1.28853	1.33485	2.8536	2.61319	5.48328	5.02592	9.47785	9.31036	17.5279	16.0762	25.1057	24.6062
80.7	1.28852	1.33484	2.85359	2.61318	5.48327	5.02591	9.47782	9.31033	17.5279	16.0762	25.1056	24.6061
80.8	1.28852	1.33484	2.85358	2.61317	5.48325	5.02589	9.47779	9.3103	17.5278	16.0761	25.1055	24.606
80.9	1.28851	1.33483	2.85358	2.61317	5.48324	5.02588	9.47776	9.31027	17.5278	16.0761	25.1055	24.606
81	1.28851	1.33483	2.85357	2.61316	5.48321	5.02586	9.47773	9.31024	17.5277	16.076	25.1054	24.6059
81.1	1.2885	1.33482	2.85356	2.61315	5.48319	5.02584	9.4777	9.31021	17.5277	16.076	25.1053	24.6058
81.2	1.2885	1.33482	2.85355	2.61314	5.48318	5.02583	9.47767	9.31018	17.5276	16.0759	25.1052	24.6057
81.3	1.2885	1.33482	2.85354	2.61313	5.48316	5.02581	9.47764	9.31015	17.5276	16.0759	25.1051	24.6056
81.4	1.28849	1.33481	2.85353	2.61312	5.48314	5.02579	9.47761	9.31012	17.5274	16.0758	25.1051	24.6056
81.5	1.28849	1.33481	2.85353	2.61312	5.48313	5.02578	9.47758	9.31009	17.5274	16.0758	25.105	24.6055
81.6	1.28848	1.3348	2.85352	2.61311	5.4831	5.02576	9.47755	9.31006	17.5273	16.0757	25.1049	24.6054
81.7	1.28848	1.3348	2.85351	2.6131	5.48309	5.02575	9.47752	9.31003	17.5273	16.0757	25.1048	24.6053
81.8	1.28847	1.33479	2.85349	2.61309	5.48307	5.02573	9.47749	9.31	17.5272	16.0756	25.1047	24.6052
81.9	1.28847	1.33479	2.85348	2.61308	5.48305	5.02571	9.47746	9.30997	17.5272	16.0756	25.1047	24.6052
82	1.28847	1.33479	2.85347	2.61307	5.48304	5.0257	9.47743	9.30994	17.5271	16.0755	25.1046	24.6051
82.1	1.28846	1.33478	2.85346	2.61306	5.48302	5.02568	9.4774	9.30991	17.5271	16.0755	25.1045	24.605
82.2	1.28846	1.33478	2.85346	2.61306	5.48301	5.02567	9.47736	9.30988	17.527	16.0754	25.1044	24.6049
82.3	1.28845	1.33477	2.85345	2.61305	5.48298	5.02565	9.47733	9.30985	17.527	16.0754	25.1044	24.6049
82.4	1.28845	1.33477	2.85344	2.61304	5.48296	5.02563	9.4773	9.30982	17.5269	16.0753	25.1043	24.6048
82.5	1.28844	1.33476	2.85343	2.61303	5.48295	5.02562	9.47727	9.30979	17.5269	16.0753	25.1042	24.6047
82.6	1.28844	1.33476	2.85342	2.61302	5.48293	5.0256	9.47724	9.30976	17.5268	16.0752	25.1041	24.6046
82.7	1.28844	1.33476	2.85341	2.61301	5.48291	5.02558	9.47721	9.30973	17.5268	16.0752	25.104	24.6045
82.8	1.28843	1.33475	2.85341	2.61301	5.4829	5.02557	9.47718	9.3097	17.5267	16.0751	25.104	24.6045
82.9	1.28843	1.33475	2.8534	2.613	5.48288	5.02555	9.47715	9.30967	17.5267	16.0751	25.1039	24.6044
83	1.28842	1.33474	2.85339	2.61299	5.48286	5.02554	9.47712	9.30964	17.5266	16.075	25.1038	24.6043
83.1	1.28842	1.33474	2.85337	2.61298	5.48284	5.02552	9.47709	9.30961	17.5266	16.075	25.1037	24.6042
83.2	1.28841	1.33473	2.85336	2.61297	5.48282	5.0255	9.47706	9.30958	17.5265	16.0749	25.1036	24.6041
83.3	1.28841	1.33473	2.85335	2.61296	5.48281	5.02549	9.47703	9.30955	17.5264	16.0748	25.1036	24.6041
83.4	1.28841	1.33472	2.85334	2.61295	5.48279	5.02547	9.477	9.30952	17.5264	16.0748	25.1035	24.604
83.5	1.28841	1.33472	2.85334	2.61295	5.48277	5.02545	9.47697	9.30949	17.5262	16.0747	25.1034	24.6039
83.6	1.28841	1.33472	2.85333	2.61294	5.48276	5.02544	9.47694	9.30946	17.5262	16.0747	25.1033	24.6038
83.7	1.2884	1.33471	2.85332	2.61293	5.48273	5.02542	9.47691	9.30943	17.5261	16.0746	25.1032	24.6037
83.8	1.2884	1.33471	2.85331	2.61292	5.48272	5.02541	9.47688	9.3094	17.5261	16.0746	25.1032	24.6037
83.9	1.28839	1.3347	2.8533	2.61291	5.4827	5.02539	9.47685	9.30937	17.526	16.0745	25.1031	24.6036
84	1.28839	1.3347	2.85329	2.6129	5.48268	5.02537	9.47682	9.30934	17.526	16.0745	25.103	24.6035
84.1	1.28838	1.33469	2.85329	2.6129	5.48267	5.02536	9.47678	9.30931	17.5259	16.0744	25.1028	24.6034
84.2	1.28838	1.33469	2.85328	2.61289	5.48265	5.02534	9.47675	9.30928	17.5259	16.0744	25.1027	24.6033
84.3	1.28838	1.33469	2.85326	2.61288	5.48262	5.02532	9.47672	9.30925	17.5258	16.0743	25.1027	24.6033
84.4	1.28837	1.33468	2.85325	2.61287	5.48261	5.02531	9.47669	9.30922	17.5258	16.0743	25.1026	24.6032
84.5	1.28837	1.33468	2.85324	2.61286	5.48259	5.02529	9.47665	9.30918	17.5257	16.0742	25.1025	24.6031
84.6	1.28836	1.33467	2.85323	2.61285	5.48258	5.02528	9.47662	9.30915	17.5257	16.0742	25.1024	24.603
84.7	1.28836	1.33467	2.85323	2.61285	5.48256	5.02526	9.47659	9.30912	17.5256	16.0741	25.1023	24.6029
84.8	1.28835	1.33466	2.85322	2.61284	5.48254	5.02524	9.47656	9.30909	17.5256	16.0741	25.1023	24.6029
84.9	1.28835	1.33466	2.85321	2.61283	5.48253	5.02523	9.47653	9.30906	17.5255	16.074	25.1022	24.6028
85	1.28835	1.33466	2.8532	2.61282	5.4825	5.02521	9.4765	9.30903	17.5255	16.074	25.1021	24.6027
85.1	1.28834	1.33465	2.85319	2.61281	5.48248	5.02519	9.47647	9.309	17.5254	16.0739	25.102	24.6026
85.2	1.28834	1.33465	2.85318	2.6128	5.48247	5.02518	9.47644	9.30897	17.5254	16.0739	25.1019	24.6025
85.3	1.28833	1.33464	2.85317	2.61279	5.48245	5.02516	9.47641	9.30894	17.5253	16.0738	25.1019	24.6025
85.4	1.28833	1.33464	2.85317	2.61279	5.48244	5.02515	9.47638	9.30891	17.5253	16.0738	25.1018	24.6024
85.5	1.28832	1.33463	2.85316	2.61278	5.48242	5.02513	9.47635	9.30888	17.5252	16.0737	25.1017	24.6023
85.6	1.28832	1.33463	2.85314	2.61277	5.4824	5.02511	9.47632	9.30885	17.5252	16.0737	25.1016	24.6022
85.7	1.28832	1.33463	2.85313	2.61276	5.48238	5.0251	9.47629	9.30882	17.525	16.0736	25.1015	24.6021
85.8	1.28831	1.33462	2.85312	2.61275	5.48236	5.02508	9.47626	9.30879	17.525	16.0736	25.1015	24.6021
85.9	1.28831	1.33462	2.85311	2.61274	5.48234	5.02506	9.47622	9.30876	17.5249	16.0735	25.1014	24.602
86	1.2883	1.33461	2.85311	2.61274	5.48233	5.02505	9.47619	9.30873	17.5248	16.0734	25.1013	24.6019
86.1	1.2883	1.33461	2.8531	2.61273	5.48231	5.02503	9.47616	9.3087	17.5248	16.0734	25.1012	24.6018
86.2	1.28829	1.3346	2.85309	2.61272	5.4823	5.02502	9.47613	9.30867	17.5247	16.0733	25.1012	24.6018
86.3	1.28829	1.3346	2.85308	2.61271	5.48228	5.025	9.4761	9.30864	17.5247	16.0733	25.1011	24.6017
86.4	1.28829	1.3346	2.85307	2.6127	5.48225	5.02498	9.47607	9.30861	17.5246	16.0732	25.101	24.6016
86.5	1.28828	1.33459	2.85306	2.61269	5.48224	5.02497	9.47604	9.30858	17.5246	16.0732	25.1009	24.6015
86.6	1.28828	1.33459	2.85305	2.61268	5.48222	5.02495	9.47601	9.30855	17.5245	16.0731	25.1008	24.6014
86.7	1.28827	1.33458	2.85305	2.61268	5.4822	5.02493	9.47598	9.30852	17.5245	16.0731	25.1008	24.6014
86.8	1.28827	1.33458	2.85304	2.61267	5.48219	5.02492	9.47595	9.30849	17.5244	16.073	25.1007	24.6013
86.9	1.28826	1.33457	2.85302	2.61266	5.48217	5.0249	9.47592	9.30846	17.5244	16.073	25.1006	24.6012
87	1.28826	1.33457	2.85301	2.61265	5.48215	5.02489	9.47589	9.30843	17.5243	16.0729	25.1005	24.6011
87.1	1.28826	1.33457	2.853	2.61264	5.48213	5.02487	9.47586	9.3084	17.5243	16.0729	25.1004	24.601
87.2	1.28825	1.33456	2.85299	2.61263	5.48211	5.02485	9.47583	9.30837	17.5242	16.0728	25.1004	24.601
87.3	1.28825	1.33456	2.85299	2.61263	5.4821	5.02484	9.4758	9.30834	17.5242	16.0728	25.1003	24.6009
87.4	1.28824	1.33455	2.85298	2.61262	5.48208	5.02482	9.47577	9.30831	17.5241	16.0727	25.1002	24.6008
87.5	1.28824	1.33455	2.85297	2.61261	5.48207	5.02481	9.47574	9.30828	17.5241	16.0727	25.1001	24.6007
87.6	1.28823	1.33454	2.85296	2.6126	5.48205	5.02479	9.47571	9.30825	17.524	16.0726	25.1	24.6006
87.7	1.28823	1.33454	2.85295	2.61259	5.48202	5.02477	9.47567	9.30822	17.524	16.0726	25.1	24.6006
87.8	1.28823	1.33454	2.85294	2.61258	5.48201	5.02476	9.47564	9.30819	17.5238	16.0725	25.0999	24.6005
87.9	1.28822	1.33453	2.85294	2.61258	5.48199	5.02474	9.47561	9.30816	17.5238	16.0725	25.0998	24.6004
88	1.28822	1.33453	2.85293	2.61257	5.48197	5.02472	9.47558	9.30813	17.5237	16.0724	25.0997	24.6003
88.1	1.28821	1.33452	2.85292	2.61256	5.48196	5.02471	9.47555	9.3081	17.5237	16.0724	25.0996	24.6002
88.2	1.28821	1.33452	2.8529	2.61255	5.48194	5.02469	9.47552	9.30807	17.5236	16.0723	25.0996	24.6002
88.3	1.2882	1.33451	2.85289	2.61254	5.48193	5.02468	9.47549	9.30804	17.5236	16.0723	25.0995	24.6001
88.4	1.2882	1.33451	2.85288	2.61253	5.4819	5.02466	9.47546	9.30801	17.5235	16.0722	25.0994	24.6
88.5	1.2882	1.33451	2.85287	2.61252	5.48188	5.02464	9.47543	9.30798	17.5234	16.0721	25.0993	24.5999
88.6	1.28819	1.3345	2.85287	2.61252	5.48187	5.02463	9.4754	9.30795	17.5234	16.0721	25.0992	24.5998
88.7	1.28819	1.3345	2.85286	2.61251	5.48185	5.02461	9.47537	9.30792	17.5233	16.072	25.0992	24.5998
88.8	1.28818	1.33449	2.85285	2.6125	5.48183	5.02459	9.47534	9.30789	17.5233	16.072	25.0991	24.5997
88.9	1.28818	1.33449	2.85284	2.61249	5.48182	5.02458	9.47531	9.30786	17.5232	16.0719	25.099	24.5996
89	1.28817	1.33448	2.85283	2.61248	5.48179	5.02456	9.47528	9.30783	17.5232	16.0719	25.0989	24.5995
89.1	1.28817	1.33448	2.85282	2.61247	5.48178	5.02455	9.47525	9.3078	17.5231	16.0718	25.0988	24.5994
89.2	1.28816	1.33447	2.85282	2.61247	5.48176	5.02453	9.47522	9.30777	17.5231	16.0718	25.0988	24.5994
89.3	1.28816	1.33447	2.85281	2.61246	5.48174	5.02451	9.47519	9.30774	17.523	16.0717	25.0987	24.5993
89.4	1.28816	1.33447	2.8528	2.61245	5.48173	5.0245	9.47516	9.30771	17.523	16.0717	25.0986	24.5992
89.5	1.28815	1.33446	2.85278	2.61244	5.48171	5.02448	9.47513	9.30768	17.5229	16.0716	25.0985	24.5991
89.6	1.28815	1.33446	2.85277	2.61243	5.48169	5.02446	9.47509	9.30765	17.5229	16.0716	25.0985	24.5991
89.7	1.28814	1.33445	2.85276	2.61242	5.48167	5.02445	9.47506	9.30762	17.5228	16.0715	25.0984	24.599
89.8	1.28814	1.33445	2.85276	2.61242	5.48165	5.02443	9.47503	9.30759	17.5228	16.0715	25.0983	24.5989
89.9	1.28813	1.33444	2.85275	2.61241	5.48164	5.02442	9.475	9.30756	17.5226	16.0714	25.0982	24.5988
90	1.28813	1.33444	2.85274	2.6124	5.48162	5.0244	9.47497	9.30753	17.5226	16.0714	25.0981	24.5987
90.1	1.28813	1.33444	2.85273	2.61239	5.4816	5.02438	9.47494	9.3075	17.5225	16.0713	25.0981	24.5987
90.2	1.28813	1.33443	2.85272	2.61238	5.48159	5.02437	9.47491	9.30747	17.5225	16.0713	25.098	24.5986
90.3	1.28813	1.33443	2.85271	2.61237	5.48157	5.02435	9.47488	9.30744	17.5224	16.0712	25.0978	24.5985
90.4	1.28812	1.33442	2.8527	2.61236	5.48154	5.02433	9.47485	9.30741	17.5224	16.0712	25.0977	24.5984
90.5	1.28812	1.33442	2.8527	2.61236	5.48153	5.02432	9.47482	9.30738	17.5223	16.0711	25.0976	24.5983
90.6	1.28811	1.33441	2.85269	2.61235	5.48151	5.0243	9.47479	9.30735	17.5223	16.0711	25.0976	24.5983
90.7	1.28811	1.33441	2.85268	2.61234	5.4815	5.02429	9.47476	9.30732	17.5222	16.071	25.0975	24.5982
90.8	1.28811	1.33441	2.85266	2.61233	5.48148	5.02427	9.47473	9.30729	17.5222	16.071	25.0974	24.5981
90.9	1.2881	1.3344	2.85265	2.61232	5.48146	5.02425	9.4747	9.30726	17.5221	16.0709	25.0973	24.598
91	1.2881	1.3344	2.85264	2.61231	5.48145	5.02424	9.47467	9.30723	17.5221	16.0709	25.0972	24.5979
91.1	1.28809	1.33439	2.85264	2.61231	5.48142	5.02422	9.47464	9.3072	17.522	16.0708	25.0972	24.5979
91.2	1.28809	1.33439	2.85263	2.6123	5.4814	5.0242	9.47461	9.30717	17.5219	16.0707	25.0971	24.5978
91.3	1.28808	1.33438	2.85262	2.61229	5.48139	5.02419	9.47458	9.30714	17.5219	16.0707	25.097	24.5977
91.4	1.28808	1.33438	2.85261	2.61228	5.48137	5.02417	9.47454	9.30711	17.5218	16.0706	25.0969	24.5976
91.5	1.28808	1.33438	2.8526	2.61227	5.48136	5.02416	9.47451	9.30708	17.5218	16.0706	25.0968	24.5975
91.6	1.28807	1.33437	2.85259	2.61226	5.48134	5.02414	9.47448	9.30705	17.5217	16.0705	25.0968	24.5975
91.7	1.28807	1.33437	2.85258	2.61225	5.48131	5.02412	9.47445	9.30702	17.5217	16.0705	25.0967	24.5974
91.8	1.28806	1.33436	2.85258	2.61225	5.4813	5.02411	9.47442	9.30699	17.5216	16.0704	25.0966	24.5973
91.9	1.28806	1.33436	2.85257	2.61224	5.48128	5.02409	9.47439	9.30696	17.5216	16.0704	25.0965	24.5972
92	1.28805	1.33435	2.85256	2.61223	5.48127	5.02408	9.47436	9.30693	17.5214	16.0703	25.0964	24.5971
92.1	1.28805	1.33435	2.85254	2.61222	5.48125	5.02406	9.47433	9.3069	17.5214	16.0703	25.0964	24.5971
92.2	1.28805	1.33435	2.85253	2.61221	5.48123	5.02404	9.4743	9.30687	17.5213	16.0702	25.0963	24.597
92.3	1.28804	1.33434	2.85252	2.6122	5.48122	5.02403	9.47427	9.30684	17.5213	16.0702	25.0962	24.5969
92.4	1.28804	1.33434	2.85252	2.6122	5.48119	5.02401	9.47424	9.30681	17.5212	16.0701	25.0961	24.5968
92.5	1.28803	1.33433	2.85251	2.61219	5.48117	5.02399	9.47421	9.30678	17.5212	16.0701	25.096	24.5967
92.6	1.28803	1.33433	2.8525	2.61218	5.48116	5.02398	9.47418	9.30675	17.5211	16.07	25.096	24.5967
92.7	1.28802	1.33432	2.85249	2.61217	5.48114	5.02396	9.47415	9.30672	17.5211	16.07	25.0959	24.5966
92.8	1.28802	1.33432	2.85248	2.61216	5.48113	5.02395	9.47412	9.30669	17.521	16.0699	25.0958	24.5965
92.9	1.28802	1.33432	2.85247	2.61215	5.48111	5.02393	9.47409	9.30666	17.521	16.0699	25.0957	24.5964
93	1.28801	1.33431	2.85247	2.61215	5.48109	5.02391	9.47406	9.30663	17.5209	16.0698	25.0957	24.5964
93.1	1.28801	1.33431	2.85246	2.61214	5.48107	5.0239	9.47403	9.3066	17.5209	16.0698	25.0956	24.5963
93.2	1.288	1.3343	2.85245	2.61213	5.48105	5.02388	9.474	9.30657	17.5208	16.0697	25.0955	24.5962
93.3	1.288	1.3343	2.85244	2.61212	5.48103	5.02386	9.47396	9.30654	17.5208	16.0697	25.0954	24.5961
93.4	1.28799	1.33429	2.85242	2.61211	5.48102	5.02385	9.47393	9.30651	17.5207	16.0696	25.0953	24.596
93.5	1.28799	1.33429	2.85241	2.6121	5.481	5.02383	9.4739	9.30648	17.5207	16.0696	25.0953	24.596
93.6	1.28799	1.33429	2.8524	2.61209	5.48099	5.02382	9.47387	9.30645	17.5206	16.0695	25.0952	24.5959
93.7	1.28798	1.33428	2.8524	2.61209	5.48097	5.0238	9.47384	9.30642	17.5206	16.0695	25.0951	24.5958
93.8	1.28798	1.33428	2.85239	2.61208	5.48094	5.02378	9.47381	9.30639	17.5205	16.0694	25.095	24.5957
93.9	1.28797	1.33427	2.85238	2.61207	5.48093	5.02377	9.47378	9.30636	17.5204	16.0693	25.0949	24.5956
94	1.28797	1.33427	2.85237	2.61206	5.48091	5.02375	9.47375	9.30633	17.5204	16.0693	25.0949	24.5956
94.1	1.28796	1.33426	2.85236	2.61205	5.48089	5.02373	9.47372	9.3063	17.5202	16.0692	25.0948	24.5955
94.2	1.28796	1.33426	2.85235	2.61204	5.48088	5.02372	9.47369	9.30627	17.5202	16.0692	25.0947	24.5954
94.3	1.28796	1.33426	2.85235	2.61204	5.48086	5.0237	9.47366	9.30624	17.5201	16.0691	25.0946	24.5953
94.4	1.28795	1.33425	2.85234	2.61203	5.48085	5.02369	9.47363	9.30621	17.5201	16.0691	25.0945	24.5952
94.5	1.28795	1.33425	2.85233	2.61202	5.48082	5.02367	9.4736	9.30618	17.52	16.069	25.0945	24.5952
94.6	1.28794	1.33424	2.85231	2.61201	5.4808	5.02365	9.47357	9.30615	17.52	16.069	25.0944	24.5951
94.7	1.28794	1.33424	2.8523	2.612	5.48079	5.02364	9.47354	9.30612	17.5199	16.0689	25.0943	24.595
94.8	1.28793	1.33423	2.85229	2.61199	5.48077	5.02362	9.47351	9.30609	17.5199	16.0689	25.0942	24.5949
94.9	1.28793	1.33423	2.85228	2.61198	5.48075	5.0236	9.47348	9.30606	17.5198	16.0688	25.0941	24.5948
95	1.28792	1.33422	2.85228	2.61198	5.48074	5.02359	9.47345	9.30603	17.5198	16.0688	25.0941	24.5948
95.1	1.28792	1.33422	2.85227	2.61197	5.48071	5.02357	9.47341	9.306	17.5197	16.0687	25.094	24.5947
95.2	1.28792	1.33422	2.85226	2.61196	5.4807	5.02356	9.47338	9.30597	17.5197	16.0687	25.0939	24.5946
95.3	1.28791	1.33421	2.85225	2.61195	5.48068	5.02354	9.47335	9.30594	17.5196	16.0686	25.0938	24.5945
95.4	1.28791	1.33421	2.85224	2.61194	5.48066	5.02352	9.47332	9.30591	17.5196	16.0686	25.0937	24.5944
95.5	1.2879	1.3342	2.85223	2.61193	5.48065	5.02351	9.47329	9.30588	17.5195	16.0685	25.0937	24.5944
95.6	1.2879	1.3342	2.85223	2.61193	5.48063	5.02349	9.47326	9.30585	17.5195	16.0685	25.0936	24.5943
95.7	1.28789	1.33419	2.85222	2.61192	5.48061	5.02347	9.47323	9.30582	17.5194	16.0684	25.0935	24.5942
95.8	1.28789	1.33419	2.85221	2.61191	5.48059	5.02346	9.4732	9.30579	17.5194	16.0684	25.0934	24.5941
95.9	1.28789	1.33419	2.85219	2.6119	5.48057	5.02344	9.47317	9.30576	17.5193	16.0683	25.0933	24.594
96	1.28788	1.33418	2.85218	2.61189	5.48056	5.02343	9.47314	9.30573	17.5193	16.0683	25.0933	24.594
96.1	1.28788	1.33418	2.85217	2.61188	5.48054	5.02341	9.47311	9.3057	17.5192	16.0682	25.0932	24.5939
96.2	1.28787	1.33417	2.85217	2.61188	5.48052	5.02339	9.47308	9.30567	17.5192	16.0682	25.0931	24.5938
96.3	1.28787	1.33417	2.85216	2.61187	5.48051	5.02338	9.47305	9.30564	17.519	16.0681	25.093	24.5937
96.4	1.28786	1.33416	2.85215	2.61186	5.48049	5.02336	9.47302	9.30561	17.5189	16.068	25.093	24.5937
96.5	1.28786	1.33416	2.85214	2.61185	5.48047	5.02335	9.47299	9.30558	17.5189	16.068	25.0929	24.5936
96.6	1.28786	1.33416	2.85213	2.61184	5.48045	5.02333	9.47296	9.30555	17.5188	16.0679	25.0927	24.5935
96.7	1.28785	1.33415	2.85212	2.61183	5.48043	5.02331	9.47293	9.30552	17.5188	16.0679	25.0926	24.5934
96.8	1.28785	1.33415	2.85211	2.61182	5.48042	5.0233	9.4729	9.30549	17.5187	16.0678	25.0925	24.5933
96.9	1.28785	1.33414	2.85211	2.61182	5.4804	5.02328	9.47287	9.30546	17.5187	16.0678	25.0925	24.5933
97	1.28785	1.33414	2.8521	2.61181	5.48038	5.02326	9.47283	9.30543	17.5186	16.0677	25.0924	24.5932
97.1	1.28784	1.33413	2.85209	2.6118	5.48037	5.02325	9.4728	9.3054	17.5186	16.0677	25.0923	24.5931
97.2	1.28784	1.33413	2.85207	2.61179	5.48034	5.02323	9.47277	9.30537	17.5185	16.0676	25.0922	24.593
97.3	1.28784	1.33413	2.85206	2.61178	5.48033	5.02322	9.47274	9.30534	17.5185	16.0676	25.0921	24.5929
97.4	1.28783	1.33412	2.85205	2.61177	5.48031	5.0232	9.47271	9.30531	17.5184	16.0675	25.0921	24.5929
97.5	1.28783	1.33412	2.85205	2.61177	5.48029	5.02318	9.47268	9.30528	17.5184	16.0675	25.092	24.5928
97.6	1.28782	1.33411	2.85204	2.61176	5.48028	5.02317	9.47265	9.30525	17.5183	16.0674	25.0919	24.5927
97.7	1.28782	1.33411	2.85203	2.61175	5.48026	5.02315	9.47262	9.30522	17.5183	16.0674	25.0918	24.5926
97.8	1.28781	1.3341	2.85202	2.61174	5.48023	5.02313	9.47259	9.30519	17.5182	16.0673	25.0917	24.5925
97.9	1.28781	1.3341	2.85201	2.61173	5.48022	5.02312	9.47256	9.30516	17.5182	16.0673	25.0917	24.5925
98	1.28781	1.3341	2.852	2.61172	5.4802	5.0231	9.47253	9.30513	17.5181	16.0672	25.0916	24.5924
98.1	1.2878	1.33409	2.85199	2.61171	5.48019	5.02309	9.4725	9.3051	17.5181	16.0672	25.0915	24.5923
98.2	1.2878	1.33409	2.85199	2.61171	5.48017	5.02307	9.47247	9.30507	17.518	16.0671	25.0914	24.5922
98.3	1.28779	1.33408	2.85198	2.6117	5.48015	5.02305	9.47244	9.30504	17.518	16.0671	25.0913	24.5921
98.4	1.28779	1.33408	2.85197	2.61169	5.48014	5.02304	9.47241	9.30501	17.5179	16.067	25.0913	24.5921
98.5	1.28778	1.33407	2.85195	2.61168	5.48011	5.02302	9.47238	9.30498	17.5179	16.067	25.0912	24.592
98.6	1.28778	1.33407	2.85194	2.61167	5.48009	5.023	9.47235	9.30495	17.5177	16.0669	25.0911	24.5919
98.7	1.28778	1.33407	2.85193	2.61166	5.48008	5.02299	9.47232	9.30492	17.5177	16.0669	25.091	24.5918
98.8	1.28777	1.33406	2.85193	2.61166	5.48006	5.02297	9.47228	9.30489	17.5176	16.0668	25.0909	24.5917
98.9	1.28777	1.33406	2.85192	2.61165	5.48005	5.02296	9.47225	9.30486	17.5176	16.0668	25.0909	24.5917
99	1.28776	1.33405	2.85191	2.61164	5.48003	5.02294	9.47222	9.30483	17.5175	16.0667	25.0908	24.5916
99.1	1.28776	1.33405	2.8519	2.61163	5.48001	5.02292	9.47219	9.3048	17.5174	16.0666	25.0907	24.5915
99.2	1.28775	1.33404	2.85189	2.61162	5.47999	5.02291	9.47216	9.30477	17.5174	16.0666	25.0906	24.5914
99.3	1.28775	1.33404	2.85188	2.61161	5.47997	5.02289	9.47213	9.30474	17.5173	16.0665	25.0905	24.5913
99.4	1.28775	1.33404	2.85188	2.61161	5.47995	5.02287	9.4721	9.30471	17.5173	16.0665	25.0905	24.5913
99.5	1.28774	1.33403	2.85187	2.6116	5.47994	5.02286	9.47207	9.30468	17.5172	16.0664	25.0904	24.5912
99.6	1.28774	1.33403	2.85186	2.61159	5.47992	5.02284	9.47204	9.30465	17.5172	16.0664	25.0903	24.5911
99.7	1.28773	1.33402	2.85185	2.61158	5.47991	5.02283	9.47201	9.30462	17.5171	16.0663	25.0902	24.591
99.8	1.28773	1.33402	2.85183	2.61157	5.47989	5.02281	9.47198	9.30459	17.5171	16.0663	25.0902	24.591
99.9	1.28772	1.33401	2.85182	2.61156	5.47986	5.02279	9.47195	9.30456	17.517	16.0662	25.0901	24.5909
100	1.28772	1.33401	2.85181	2.61155	5.47985	5.02278	9.47192	9.30453	17.517	16.0662	25.09	24.5908
100.1	1.28772	1.33401	2.85181	2.61155	5.47983	5.02276	9.47189	9.3045	17.5169	16.0661	25.0899	24.5907
100.2	1.28771	1.334	2.8518	2.61154	5.47981	5.02274	9.47186	9.30447	17.5169	16.0661	25.0898	24.5906
100.3	1.28771	1.334	2.85179	2.61153	5.4798	5.02273	9.47183	9.30444	17.5168	16.066	25.0898	24.5906
100.4	1.2877	1.33399	2.85178	2.61152	5.47978	5.02271	9.4718	9.30441	17.5168	16.066	25.0897	24.5905
100.5	1.2877	1.33399	2.85177	2.61151	5.47977	5.0227	9.47177	9.30438	17.5167	16.0659	25.0896	24.5904
100.6	1.28769	1.33398	2.85176	2.6115	5.47974	5.02268	9.47174	9.30435	17.5167	16.0659	25.0895	24.5903
100.7	1.28769	1.33398	2.85176	2.6115	5.47972	5.02266	9.4717	9.30432	17.5165	16.0658	25.0894	24.5902
100.8	1.28769	1.33398	2.85175	2.61149	5.47971	5.02265	9.47167	9.30429	17.5165	16.0658	25.0894	24.5902
100.9	1.28768	1.33397	2.85174	2.61148	5.47969	5.02263	9.47164	9.30426	17.5164	16.0657	25.0893	24.5901
101	1.28768	1.33397	2.85173	2.61147	5.47968	5.02262	9.47161	9.30423	17.5164	16.0657	25.0892	24.59
101.1	1.28767	1.33396	2.85171	2.61146	5.47966	5.0226	9.47158	9.3042	17.5163	16.0656	25.0891	24.5899
101.2	1.28767	1.33396	2.8517	2.61145	5.47963	5.02258	9.47155	9.30417	17.5163	16.0656	25.089	24.5898
101.3	1.28766	1.33395	2.8517	2.61145	5.47962	5.02257	9.47152	9.30414	17.5162	16.0655	25.089	24.5898
101.4	1.28766	1.33395	2.85169	2.61144	5.4796	5.02255	9.47149	9.30411	17.5162	16.0655	25.0889	24.5897
101.5	1.28765	1.33394	2.85168	2.61143	5.47958	5.02253	9.47146	9.30408	17.5161	16.0654	25.0888	24.5896
101.6	1.28765	1.33394	2.85167	2.61142	5.47957	5.02252	9.47143	9.30405	17.5161	16.0654	25.0887	24.5895
101.7	1.28765	1.33394	2.85166	2.61141	5.47955	5.0225	9.4714	9.30402	17.516	16.0653	25.0886	24.5894
101.8	1.28764	1.33393	2.85165	2.6114	5.47954	5.02249	9.47137	9.30399	17.5159	16.0652	25.0886	24.5894
101.9	1.28764	1.33393	2.85164	2.61139	5.47951	5.02247	9.47134	9.30396	17.5159	16.0652	25.0885	24.5893
102	1.28763	1.33392	2.85164	2.61139	5.47949	5.02245	9.47131	9.30393	17.5158	16.0651	25.0884	24.5892
102.1	1.28763	1.33392	2.85163	2.61138	5.47948	5.02244	9.47128	9.3039	17.5158	16.0651	25.0883	24.5891
102.2	1.28762	1.33391	2.85162	2.61137	5.47946	5.02242	9.47125	9.30387	17.5157	16.065	25.0882	24.589
102.3	1.28762	1.33391	2.85161	2.61136	5.47944	5.0224	9.47122	9.30384	17.5157	16.065	25.0882	24.589
102.4	1.28762	1.33391	2.85159	2.61135	5.47943	5.02239	9.47119	9.30381	17.5156	16.0649	25.0881	24.5889
102.5	1.28761	1.3339	2.85158	2.61134	5.47941	5.02237	9.47116	9.30378	17.5156	16.0649	25.088	24.5888
102.6	1.28761	1.3339	2.85158	2.61134	5.47939	5.02236	9.47112	9.30375	17.5155	16.0648	25.0879	24.5887
102.7	1.2876	1.33389	2.85157	2.61133	5.47937	5.02234	9.47109	9.30372	17.5155	16.0648	25.0877	24.5886
102.8	1.2876	1.33389	2.85156	2.61132	5.47935	5.02232	9.47106	9.30369	17.5153	16.0647	25.0877	24.5886
102.9	1.28759	1.33388	2.85155	2.61131	5.47934	5.02231	9.47103	9.30366	17.5153	16.0647	25.0876	24.5885
103	1.28759	1.33388	2.85154	2.6113	5.47932	5.02229	9.471	9.30363	17.5152	16.0646	25.0875	24.5884
103.1	1.28759	1.33388	2.85153	2.61129	5.4793	5.02227	9.47097	9.3036	17.5152	16.0646	25.0874	24.5883
103.2	1.28758	1.33387	2.85152	2.61128	5.47929	5.02226	9.47094	9.30357	17.5151	16.0645	25.0874	24.5883
103.3	1.28758	1.33387	2.85152	2.61128	5.47926	5.02224	9.47091	9.30354	17.5151	16.0645	25.0873	24.5882
103.4	1.28758	1.33386	2.85151	2.61127	5.47925	5.02223	9.47088	9.30351	17.515	16.0644	25.0872	24.5881
103.5	1.28758	1.33386	2.8515	2.61126	5.47923	5.02221	9.47085	9.30348	17.515	16.0644	25.0871	24.588
103.6	1.28757	1.33385	2.85149	2.61125	5.47921	5.02219	9.47082	9.30345	17.5149	16.0643	25.087	24.5879
103.7	1.28757	1.33385	2.85147	2.61124	5.4792	5.02218	9.47079	9.30342	17.5149	16.0643	25.087	24.5879
103.8	1.28757	1.33385	2.85146	2.61123	5.47918	5.02216	9.47076	9.30339	17.5148	16.0642	25.0869	24.5878
103.9	1.28756	1.33384	2.85146	2.61123	5.47915	5.02214	9.47073	9.30336	17.5148	16.0642	25.0868	24.5877
104	1.28756	1.33384	2.85145	2.61122	5.47914	5.02213	9.4707	9.30333	17.5147	16.0641	25.0867	24.5876
104.1	1.28755	1.33383	2.85144	2.61121	5.47912	5.02211	9.47067	9.3033	17.5147	16.0641	25.0866	24.5875
104.2	1.28755	1.33383	2.85143	2.6112	5.47911	5.0221	9.47064	9.30327	17.5146	16.064	25.0866	24.5875
104.3	1.28754	1.33382	2.85142	2.61119	5.47909	5.02208	9.47061	9.30324	17.5146	16.064	25.0865	24.5874
104.4	1.28754	1.33382	2.85141	2.61118	5.47907	5.02206	9.47057	9.30321	17.5145	16.0639	25.0864	24.5873
104.5	1.28754	1.33382	2.85141	2.61118	5.47906	5.02205	9.47054	9.30318	17.5144	16.0638	25.0863	24.5872
104.6	1.28753	1.33381	2.8514	2.61117	5.47903	5.02203	9.47051	9.30315	17.5144	16.0638	25.0862	24.5871
104.7	1.28753	1.33381	2.85139	2.61116	5.47902	5.02202	9.47047	9.30311	17.5143	16.0637	25.0862	24.5871
104.8	1.28752	1.3338	2.85138	2.61115	5.479	5.022	9.47044	9.30308	17.5143	16.0637	25.0861	24.587
104.9	1.28752	1.3338	2.85136	2.61114	5.47898	5.02198	9.47041	9.30305	17.5141	16.0636	25.086	24.5869
105	1.28751	1.33379	2.85135	2.61113	5.47897	5.02197	9.47038	9.30302	17.5141	16.0636	25.0859	24.5868
105.1	1.28751	1.33379	2.85134	2.61112	5.47895	5.02195	9.47035	9.30299	17.514	16.0635	25.0858	24.5867
105.2	1.28751	1.33379	2.85134	2.61112	5.47893	5.02193	9.47032	9.30296	17.514	16.0635	25.0858	24.5867
105.3	1.2875	1.33378	2.85133	2.61111	5.47891	5.02192	9.47029	9.30293	17.5139	16.0634	25.0857	24.5866
105.4	1.2875	1.33378	2.85132	2.6111	5.47889	5.0219	9.47026	9.3029	17.5139	16.0634	25.0856	24.5865
105.5	1.28749	1.33377	2.85131	2.61109	5.47888	5.02189	9.47023	9.30287	17.5138	16.0633	25.0855	24.5864
105.6	1.28749	1.33377	2.8513	2.61108	5.47886	5.02187	9.4702	9.30284	17.5138	16.0633	25.0854	24.5863
105.7	1.28748	1.33376	2.85129	2.61107	5.47884	5.02185	9.47017	9.30281	17.5137	16.0632	25.0854	24.5863
105.8	1.28748	1.33376	2.85129	2.61107	5.47883	5.02184	9.47014	9.30278	17.5137	16.0632	25.0853	24.5862
105.9	1.28748	1.33376	2.85128	2.61106	5.47881	5.02182	9.47011	9.30275	17.5136	16.0631	25.0852	24.5861
106	1.28747	1.33375	2.85127	2.61105	5.47878	5.0218	9.47008	9.30272	17.5136	16.0631	25.0851	24.586
106.1	1.28747	1.33375	2.85126	2.61104	5.47877	5.02179	9.47005	9.30269	17.5135	16.063	25.085	24.5859
106.2	1.28746	1.33374	2.85124	2.61103	5.47875	5.02177	9.47001	9.30266	17.5135	16.063	25.085	24.5859
106.3	1.28746	1.33374	2.85123	2.61102	5.47874	5.02176	9.46998	9.30263	17.5134	16.0629	25.0849	24.5858
106.4	1.28745	1.33373	2.85123	2.61102	5.47872	5.02174	9.46995	9.3026	17.5134	16.0629	25.0848	24.5857
106.5	1.28745	1.33373	2.85122	2.61101	5.4787	5.02172	9.46992	9.30257	17.5133	16.0628	25.0847	24.5856
106.6	1.28745	1.33373	2.85121	2.611	5.47869	5.02171	9.46989	9.30254	17.5133	16.0628	25.0847	24.5856
106.7	1.28744	1.33372	2.8512	2.61099	5.47866	5.02169	9.46986	9.30251	17.5132	16.0627	25.0846	24.5855
106.8	1.28744	1.33372	2.85119	2.61098	5.47864	5.02167	9.46983	9.30248	17.5132	16.0627	25.0845	24.5854
106.9	1.28743	1.33371	2.85118	2.61097	5.47863	5.02166	9.4698	9.30245	17.5131	16.0626	25.0844	24.5853
107	1.28743	1.33371	2.85117	2.61096	5.47861	5.02164	9.46977	9.30242	17.5131	16.0626	25.0843	24.5852
107.1	1.28742	1.3337	2.85117	2.61096	5.4786	5.02163	9.46974	9.30239	17.5129	16.0625	25.0843	24.5852
107.2	1.28742	1.3337	2.85116	2.61095	5.47858	5.02161	9.46971	9.30236	17.5128	16.0624	25.0842	24.5851
107.3	1.28742	1.3337	2.85115	2.61094	5.47855	5.02159	9.46968	9.30233	17.5128	16.0624	25.0841	24.585
107.4	1.28741	1.33369	2.85114	2.61093	5.47854	5.02158	9.46965	9.3023	17.5127	16.0623	25.084	24.5849
107.5	1.28741	1.33369	2.85112	2.61092	5.47852	5.02156	9.46962	9.30227	17.5127	16.0623	25.0839	24.5848
107.6	1.2874	1.33368	2.85111	2.61091	5.4785	5.02154	9.46959	9.30224	17.5126	16.0622	25.0839	24.5848
107.7	1.2874	1.33368	2.85111	2.61091	5.47849	5.02153	9.46956	9.30221	17.5126	16.0622	25.0838	24.5847
107.8	1.28739	1.33367	2.8511	2.6109	5.47847	5.02151	9.46953	9.30218	17.5125	16.0621	25.0837	24.5846
107.9	1.28739	1.33367	2.85109	2.61089	5.47846	5.0215	9.4695	9.30215	17.5125	16.0621	25.0836	24.5845
108	1.28739	1.33367	2.85108	2.61088	5.47843	5.02148	9.46947	9.30212	17.5124	16.062	25.0835	24.5844
108.1	1.28738	1.33366	2.85107	2.61087	5.47841	5.02146	9.46943	9.30209	17.5124	16.062	25.0835	24.5844
108.2	1.28738	1.33366	2.85106	2.61086	5.4784	5.02145	9.4694	9.30206	17.5123	16.0619	25.0834	24.5843
108.3	1.28737	1.33365	2.85105	2.61085	5.47838	5.02143	9.46937	9.30203	17.5123	16.0619	25.0833	24.5842
108.4	1.28737	1.33365	2.85105	2.61085	5.47837	5.02142	9.46934	9.302	17.5122	16.0618	25.0832	24.5841
108.5	1.28736	1.33364	2.85104	2.61084	5.47835	5.0214	9.46931	9.30197	17.5122	16.0618	25.0831	24.584
108.6	1.28736	1.33364	2.85103	2.61083	5.47833	5.02138	9.46928	9.30194	17.5121	16.0617	25.0831	24.584
108.7	1.28735	1.33363	2.85102	2.61082	5.47831	5.02137	9.46925	9.30191	17.5121	16.0617	25.083	24.5839
108.8	1.28735	1.33363	2.851	2.61081	5.47829	5.02135	9.46922	9.30188	17.512	16.0616	25.0829	24.5838
108.9	1.28735	1.33363	2.85099	2.6108	5.47827	5.02133	9.46919	9.30185	17.512	16.0616	25.0827	24.5837
109	1.28734	1.33362	2.85099	2.6108	5.47826	5.02132	9.46916	9.30182	17.5119	16.0615	25.0826	24.5836
109.1	1.28734	1.33362	2.85098	2.61079	5.47824	5.0213	9.46913	9.30179	17.5119	16.0615	25.0826	24.5836
109.2	1.28733	1.33361	2.85097	2.61078	5.47823	5.02129	9.4691	9.30176	17.5117	16.0614	25.0825	24.5835
109.3	1.28733	1.33361	2.85096	2.61077	5.47821	5.02127	9.46907	9.30173	17.5117	16.0614	25.0824	24.5834
109.4	1.28732	1.3336	2.85095	2.61076	5.47818	5.02125	9.46904	9.3017	17.5116	16.0613	25.0823	24.5833
109.5	1.28732	1.3336	2.85094	2.61075	5.47817	5.02124	9.46901	9.30167	17.5116	16.0613	25.0822	24.5832
109.6	1.28732	1.3336	2.85094	2.61075	5.47815	5.02122	9.46898	9.30164	17.5115	16.0612	25.0822	24.5832
109.7	1.28731	1.33359	2.85093	2.61074	5.47813	5.0212	9.46895	9.30161	17.5115	16.0612	25.0821	24.5831
109.8	1.28731	1.33359	2.85092	2.61073	5.47812	5.02119	9.46892	9.30158	17.5114	16.0611	25.082	24.583
109.9	1.2873	1.33358	2.85091	2.61072	5.4781	5.02117	9.46888	9.30155	17.5113	16.061	25.0819	24.5829
110	1.2873	1.33358	2.8509	2.61071	5.47809	5.02116	9.46885	9.30152	17.5113	16.061	25.0819	24.5829
110.1	1.2873	1.33357	2.85088	2.6107	5.47806	5.02114	9.46882	9.30149	17.5112	16.0609	25.0818	24.5828
110.2	1.2873	1.33357	2.85087	2.61069	5.47804	5.02112	9.46879	9.30146	17.5112	16.0609	25.0817	24.5827
110.3	1.2873	1.33357	2.85087	2.61069	5.47803	5.02111	9.46876	9.30143	17.5111	16.0608	25.0816	24.5826
110.4	1.28729	1.33356	2.85086	2.61068	5.47801	5.02109	9.46873	9.3014	17.5111	16.0608	25.0815	24.5825
110.5	1.28729	1.33356	2.85085	2.61067	5.47799	5.02107	9.4687	9.30137	17.511	16.0607	25.0815	24.5825
110.6	1.28728	1.33355	2.85084	2.61066	5.47798	5.02106	9.46867	9.30134	17.511	16.0607	25.0814	24.5824
110.7	1.28728	1.33355	2.85083	2.61065	5.47795	5.02104	9.46864	9.30131	17.5109	16.0606	25.0813	24.5823
110.8	1.28727	1.33354	2.85082	2.61064	5.47794	5.02103	9.46861	9.30128	17.5109	16.0606	25.0812	24.5822
110.9	1.28727	1.33354	2.85082	2.61064	5.47792	5.02101	9.46858	9.30125	17.5108	16.0605	25.0811	24.5821
111	1.28727	1.33354	2.85081	2.61063	5.4779	5.02099	9.46855	9.30122	17.5108	16.0605	25.0811	24.5821
111.1	1.28726	1.33353	2.8508	2.61062	5.47789	5.02098	9.46852	9.30119	17.5107	16.0604	25.081	24.582
111.2	1.28726	1.33353	2.85079	2.61061	5.47787	5.02096	9.46849	9.30116	17.5107	16.0604	25.0809	24.5819
111.3	1.28725	1.33352	2.85078	2.6106	5.47786	5.02095	9.46846	9.30113	17.5105	16.0603	25.0808	24.5818
111.4	1.28725	1.33352	2.85076	2.61059	5.47783	5.02093	9.46843	9.3011	17.5105	16.0603	25.0807	24.5817
111.5	1.28724	1.33351	2.85076	2.61059	5.47781	5.02091	9.4684	9.30107	17.5104	16.0602	25.0807	24.5817
111.6	1.28724	1.33351	2.85075	2.61058	5.4778	5.0209	9.46837	9.30104	17.5104	16.0602	25.0806	24.5816
111.7	1.28724	1.33351	2.85074	2.61057	5.47778	5.02088	9.46834	9.30101	17.5103	16.0601	25.0805	24.5815
111.8	1.28723	1.3335	2.85073	2.61056	5.47776	5.02086	9.4683	9.30098	17.5103	16.0601	25.0804	24.5814
111.9	1.28723	1.3335	2.85072	2.61055	5.47775	5.02085	9.46827	9.30095	17.5102	16.06	25.0803	24.5813
112	1.28722	1.33349	2.85071	2.61054	5.47773	5.02083	9.46824	9.30092	17.5102	16.06	25.0803	24.5813
112.1	1.28722	1.33349	2.8507	2.61053	5.47771	5.02082	9.46821	9.30089	17.5101	16.0599	25.0802	24.5812
112.2	1.28721	1.33348	2.8507	2.61053	5.47769	5.0208	9.46818	9.30086	17.5101	16.0599	25.0801	24.5811
112.3	1.28721	1.33348	2.85069	2.61052	5.47767	5.02078	9.46815	9.30083	17.51	16.0598	25.08	24.581
112.4	1.28721	1.33348	2.85068	2.61051	5.47766	5.02077	9.46812	9.3008	17.51	16.0598	25.0799	24.5809
112.5	1.2872	1.33347	2.85067	2.6105	5.47764	5.02075	9.46809	9.30077	17.5099	16.0597	25.0799	24.5809
112.6	1.2872	1.33347	2.85066	2.61049	5.47762	5.02073	9.46806	9.30074	17.5098	16.0596	25.0798	24.5808
112.7	1.28719	1.33346	2.85064	2.61048	5.47761	5.02072	9.46803	9.30071	17.5098	16.0596	25.0797	24.5807
112.8	1.28719	1.33346	2.85064	2.61048	5.47758	5.0207	9.468	9.30068	17.5097	16.0595	25.0796	24.5806
112.9	1.28718	1.33345	2.85063	2.61047	5.47757	5.02069	9.46797	9.30065	17.5097	16.0595	25.0796	24.5806
113	1.28718	1.33345	2.85062	2.61046	5.47755	5.02067	9.46794	9.30062	17.5096	16.0594	25.0795	24.5805
113.1	1.28718	1.33345	2.85061	2.61045	5.47753	5.02065	9.46791	9.30059	17.5096	16.0594	25.0794	24.5804
113.2	1.28717	1.33344	2.8506	2.61044	5.47752	5.02064	9.46788	9.30056	17.5095	16.0593	25.0793	24.5803
113.3	1.28717	1.33344	2.85059	2.61043	5.4775	5.02062	9.46785	9.30053	17.5095	16.0593	25.0792	24.5802
113.4	1.28716	1.33343	2.85058	2.61042	5.47747	5.0206	9.46782	9.3005	17.5093	16.0592	25.0792	24.5802
113.5	1.28716	1.33343	2.85058	2.61042	5.47746	5.02059	9.46779	9.30047	17.5093	16.0592	25.0791	24.5801
113.6	1.28715	1.33342	2.85057	2.61041	5.47744	5.02057	9.46775	9.30044	17.5092	16.0591	25.079	24.58
113.7	1.28715	1.33342	2.85056	2.6104	5.47743	5.02056	9.46772	9.30041	17.5092	16.0591	25.0789	24.5799
113.8	1.28715	1.33342	2.85055	2.61039	5.47741	5.02054	9.46769	9.30038	17.5091	16.059	25.0788	24.5798
113.9	1.28714	1.33341	2.85053	2.61038	5.47739	5.02052	9.46766	9.30035	17.5091	16.059	25.0788	24.5798
114	1.28714	1.33341	2.85052	2.61037	5.47738	5.02051	9.46763	9.30032	17.509	16.0589	25.0787	24.5797
114.1	1.28713	1.3334	2.85052	2.61037	5.47735	5.02049	9.4676	9.30029	17.509	16.0589	25.0786	24.5796
114.2	1.28713	1.3334	2.85051	2.61036	5.47733	5.02047	9.46757	9.30026	17.5089	16.0588	25.0785	24.5795
114.3	1.28712	1.33339	2.8505	2.61035	5.47732	5.02046	9.46754	9.30023	17.5089	16.0588	25.0784	24.5794
114.4	1.28712	1.33339	2.85049	2.61034	5.4773	5.02044	9.46751	9.3002	17.5088	16.0587	25.0784	24.5794
114.5	1.28712	1.33339	2.85048	2.61033	5.47729	5.02043	9.46748	9.30017	17.5088	16.0587	25.0783	24.5793
114.6	1.28711	1.33338	2.85047	2.61032	5.47727	5.02041	9.46745	9.30014	17.5087	16.0586	25.0782	24.5792
114.7	1.28711	1.33338	2.85047	2.61032	5.47725	5.02039	9.46742	9.30011	17.5087	16.0586	25.0781	24.5791
114.8	1.2871	1.33337	2.85046	2.61031	5.47723	5.02038	9.46739	9.30008	17.5086	16.0585	25.078	24.579
114.9	1.2871	1.33337	2.85045	2.6103	5.47721	5.02036	9.46736	9.30005	17.5086	16.0585	25.078	24.579
115	1.28709	1.33336	2.85044	2.61029	5.4772	5.02035	9.46733	9.30002	17.5085	16.0584	25.0779	24.5789
115.1	1.28709	1.33336	2.85043	2.61028	5.47718	5.02033	9.4673	9.29999	17.5085	16.0584	25.0777	24.5788
115.2	1.28709	1.33336	2.85041	2.61027	5.47716	5.02031	9.46727	9.29996	17.5084	16.0583	25.0776	24.5787
115.3	1.28708	1.33335	2.8504	2.61026	5.47715	5.0203	9.46724	9.29993	17.5083	16.0582	25.0775	24.5786
115.4	1.28708	1.33335	2.8504	2.61026	5.47713	5.02028	9.46721	9.2999	17.5083	16.0582	25.0775	24.5786
115.5	1.28707	1.33334	2.85039	2.61025	5.4771	5.02026	9.46717	9.29987	17.5081	16.0581	25.0774	24.5785
115.6	1.28707	1.33334	2.85038	2.61024	5.47709	5.02025	9.46714	9.29984	17.5081	16.0581	25.0773	24.5784
115.7	1.28706	1.33333	2.85037	2.61023	5.47707	5.02023	9.46711	9.29981	17.508	16.058	25.0772	24.5783
115.8	1.28706	1.33333	2.85036	2.61022	5.47706	5.02022	9.46708	9.29978	17.508	16.058	25.0771	24.5782
115.9	1.28705	1.33332	2.85035	2.61021	5.47704	5.0202	9.46705	9.29975	17.5079	16.0579	25.0771	24.5782
116	1.28705	1.33332	2.85035	2.61021	5.47702	5.02018	9.46702	9.29972	17.5079	16.0579	25.077	24.5781
116.1	1.28705	1.33332	2.85034	2.6102	5.47701	5.02017	9.46699	9.29969	17.5078	16.0578	25.0769	24.578
116.2	1.28704	1.33331	2.85033	2.61019	5.47698	5.02015	9.46696	9.29966	17.5078	16.0578	25.0768	24.5779
116.3	1.28704	1.33331	2.85032	2.61018	5.47696	5.02013	9.46693	9.29963	17.5077	16.0577	25.0768	24.5779
116.4	1.28703	1.3333	2.85031	2.61017	5.47695	5.02012	9.4669	9.2996	17.5077	16.0577	25.0767	24.5778
116.5	1.28703	1.3333	2.85029	2.61016	5.47693	5.0201	9.46687	9.29957	17.5076	16.0576	25.0766	24.5777
116.6	1.28702	1.33329	2.85029	2.61016	5.47692	5.02009	9.46684	9.29954	17.5076	16.0576	25.0765	24.5776
116.7	1.28702	1.33329	2.85028	2.61015	5.4769	5.02007	9.46681	9.29951	17.5075	16.0575	25.0764	24.5775
116.8	1.28702	1.33329	2.85027	2.61014	5.47687	5.02005	9.46678	9.29948	17.5075	16.0575	25.0764	24.5775
116.9	1.28702	1.33328	2.85026	2.61013	5.47686	5.02004	9.46675	9.29945	17.5074	16.0574	25.0763	24.5774
117	1.28702	1.33328	2.85025	2.61012	5.47684	5.02002	9.46672	9.29942	17.5074	16.0574	25.0762	24.5773
117.1	1.28701	1.33327	2.85024	2.61011	5.47682	5.02	9.46669	9.29939	17.5073	16.0573	25.0761	24.5772
117.2	1.28701	1.33327	2.85023	2.6101	5.47681	5.01999	9.46666	9.29936	17.5073	16.0573	25.076	24.5771
117.3	1.287	1.33326	2.85023	2.6101	5.47679	5.01997	9.46662	9.29933	17.5072	16.0572	25.076	24.5771
117.4	1.287	1.33326	2.85022	2.61009	5.47678	5.01996	9.46659	9.2993	17.5072	16.0572	25.0759	24.577
117.5	1.287	1.33326	2.85021	2.61008	5.47675	5.01994	9.46656	9.29927	17.5071	16.0571	25.0758	24.5769
117.6	1.28699	1.33325	2.8502	2.61007	5.47673	5.01992	9.46653	9.29924	17.5071	16.0571	25.0757	24.5768
117.7	1.28699	1.33325	2.85019	2.61006	5.47672	5.01991	9.4665	9.29921	17.5069	16.057	25.0756	24.5767
117.8	1.28698	1.33324	2.85017	2.61005	5.4767	5.01989	9.46647	9.29918	17.5069	16.057	25.0756	24.5767
117.9	1.28698	1.33324	2.85017	2.61005	5.47669	5.01988	9.46644	9.29915	17.5068	16.0569	25.0755	24.5766
118	1.28697	1.33323	2.85016	2.61004	5.47667	5.01986	9.46641	9.29912	17.5067	16.0568	25.0754	24.5765
118.1	1.28697	1.33323	2.85015	2.61003	5.47665	5.01984	9.46638	9.29909	17.5067	16.0568	25.0753	24.5764
118.2	1.28697	1.33323	2.85014	2.61002	5.47663	5.01983	9.46635	9.29906	17.5066	16.0567	25.0752	24.5763
118.3	1.28696	1.33322	2.85013	2.61001	5.47661	5.01981	9.46632	9.29903	17.5066	16.0567	25.0752	24.5763
118.4	1.28696	1.33322	2.85012	2.61	5.47659	5.01979	9.46629	9.299	17.5065	16.0566	25.0751	24.5762
118.5	1.28695	1.33321	2.85012	2.61	5.47658	5.01978	9.46626	9.29897	17.5065	16.0566	25.075	24.5761
118.6	1.28695	1.33321	2.85011	2.60999	5.47656	5.01976	9.46623	9.29894	17.5064	16.0565	25.0749	24.576
118.7	1.28694	1.3332	2.8501	2.60998	5.47655	5.01975	9.4662	9.29891	17.5064	16.0565	25.0748	24.5759
118.8	1.28694	1.3332	2.85009	2.60997	5.47653	5.01973	9.46617	9.29888	17.5063	16.0564	25.0748	24.5759
118.9	1.28694	1.3332	2.85008	2.60996	5.4765	5.01971	9.46614	9.29885	17.5063	16.0564	25.0747	24.5758
119	1.28693	1.33319	2.85007	2.60995	5.47649	5.0197	9.46611	9.29882	17.5062	16.0563	25.0746	24.5757
119.1	1.28693	1.33319	2.85005	2.60994	5.47647	5.01968	9.46608	9.29879	17.5062	16.0563	25.0745	24.5756
119.2	1.28692	1.33318	2.85005	2.60994	5.47645	5.01966	9.46604	9.29876	17.5061	16.0562	25.0745	24.5756
119.3	1.28692	1.33318	2.85004	2.60993	5.47644	5.01965	9.46601	9.29873	17.5061	16.0562	25.0744	24.5755
119.4	1.28691	1.33317	2.85003	2.60992	5.47642	5.01963	9.46598	9.2987	17.506	16.0561	25.0743	24.5754
119.5	1.28691	1.33317	2.85002	2.60991	5.47641	5.01962	9.46595	9.29867	17.506	16.0561	25.0742	24.5753
119.6	1.28691	1.33317	2.85001	2.6099	5.47638	5.0196	9.46592	9.29864	17.5059	16.056	25.0741	24.5752
119.7	1.2869	1.33316	2.85	2.60989	5.47636	5.01958	9.46589	9.29861	17.5059	16.056	25.0741	24.5752
119.8	1.2869	1.33316	2.85	2.60989	5.47635	5.01957	9.46586	9.29858	17.5057	16.0559	25.074	24.5751
119.9	1.28689	1.33315	2.84999	2.60988	5.47633	5.01955	9.46583	9.29855	17.5057	16.0559	25.0739	24.575
120	1.28689	1.33315	2.84998	2.60987	5.47631	5.01953	9.4658	9.29852	17.5056	16.0558	25.0738	24.5749
120.1	1.28688	1.33314	2.84997	2.60986	5.4763	5.01952	9.46577	9.29849	17.5056	16.0558	25.0737	24.5748
120.2	1.28688	1.33314	2.84996	2.60985	5.47627	5.0195	9.46574	9.29846	17.5055	16.0557	25.0737	24.5748
120.3	1.28688	1.33314	2.84995	2.60984	5.47626	5.01949	9.46571	9.29843	17.5055	16.0557	25.0736	24.5747
120.4	1.28687	1.33313	2.84995	2.60984	5.47624	5.01947	9.46568	9.2984	17.5054	16.0556	25.0735	24.5746
120.5	1.28687	1.33313	2.84993	2.60983	5.47622	5.01945	9.46565	9.29837	17.5054	16.0556	25.0734	24.5745
120.6	1.28686	1.33312	2.84992	2.60982	5.47621	5.01944	9.46562	9.29834	17.5053	16.0555	25.0733	24.5744
120.7	1.28686	1.33312	2.84991	2.60981	5.47619	5.01942	9.46559	9.29831	17.5052	16.0554	25.0733	24.5744
120.8	1.28685	1.33311	2.8499	2.6098	5.47618	5.01941	9.46556	9.29828	17.5052	16.0554	25.0732	24.5743
120.9	1.28685	1.33311	2.84989	2.60979	5.47615	5.01939	9.46553	9.29825	17.5051	16.0553	25.0731	24.5742
121	1.28685	1.33311	2.84988	2.60978	5.47613	5.01937	9.46549	9.29822	17.5051	16.0553	25.073	24.5741
121.1	1.28684	1.3331	2.84988	2.60978	5.47612	5.01936	9.46546	9.29819	17.505	16.0552	25.0729	24.574
121.2	1.28684	1.3331	2.84987	2.60977	5.4761	5.01934	9.46543	9.29816	17.505	16.0552	25.0729	24.574
121.3	1.28683	1.33309	2.84986	2.60976	5.47608	5.01932	9.4654	9.29813	17.5049	16.0551	25.0728	24.5739
121.4	1.28683	1.33309	2.84985	2.60975	5.47607	5.01931	9.46537	9.2981	17.5049	16.0551	25.0726	24.5738
121.5	1.28682	1.33308	2.84984	2.60974	5.47605	5.01929	9.46534	9.29807	17.5048	16.055	25.0725	24.5737
121.6	1.28682	1.33308	2.84983	2.60973	5.47603	5.01928	9.46531	9.29804	17.5048	16.055	25.0724	24.5736
121.7	1.28682	1.33308	2.84983	2.60973	5.47601	5.01926	9.46528	9.29801	17.5047	16.0549	25.0724	24.5736
121.8	1.28681	1.33307	2.84981	2.60972	5.47599	5.01924	9.46525	9.29798	17.5047	16.0549	25.0723	24.5735
121.9	1.28681	1.33307	2.8498	2.60971	5.47598	5.01923	9.46522	9.29795	17.5045	16.0548	25.0722	24.5734
122	1.2868	1.33306	2.84979	2.6097	5.47596	5.01921	9.46519	9.29792	17.5045	16.0548	25.0721	24.5733
122.1	1.2868	1.33306	2.84978	2.60969	5.47594	5.01919	9.46516	9.29789	17.5044	16.0547	25.072	24.5732
122.2	1.28679	1.33305	2.84977	2.60968	5.47593	5.01918	9.46513	9.29786	17.5044	16.0547	25.072	24.5732
122.3	1.28679	1.33305	2.84976	2.60967	5.4759	5.01916	9.4651	9.29783	17.5043	16.0546	25.0719	24.5731
122.4	1.28679	1.33305	2.84976	2.60967	5.47589	5.01915	9.46507	9.2978	17.5043	16.0546	25.0718	24.573
122.5	1.28678	1.33304	2.84975	2.60966	5.47587	5.01913	9.46504	9.29777	17.5042	16.0545	25.0717	24.5729
122.6	1.28678	1.33304	2.84974	2.60965	5.47585	5.01911	9.46501	9.29774	17.5042	16.0545	25.0717	24.5729
122.7	1.28677	1.33303	2.84973	2.60964	5.47584	5.0191	9.46498	9.29771	17.5041	16.0544	25.0716	24.5728
122.8	1.28677	1.33303	2.84972	2.60963	5.47582	5.01908	9.46495	9.29768	17.5041	16.0544	25.0715	24.5727
122.9	1.28676	1.33302	2.84971	2.60962	5.47579	5.01906	9.46491	9.29765	17.504	16.0543	25.0714	24.5726
123	1.28676	1.33302	2.84971	2.60962	5.47578	5.01905	9.46488	9.29762	17.504	16.0543	25.0713	24.5725
123.1	1.28675	1.33301	2.84969	2.60961	5.47576	5.01903	9.46485	9.29759	17.5039	16.0542	25.0713	24.5725
123.2	1.28675	1.33301	2.84968	2.6096	5.47575	5.01902	9.46482	9.29756	17.5039	16.0542	25.0712	24.5724
123.3	1.28675	1.33301	2.84967	2.60959	5.47573	5.019	9.46479	9.29753	17.5038	16.0541	25.0711	24.5723
123.4	1.28674	1.333	2.84966	2.60958	5.47571	5.01898	9.46476	9.2975	17.5037	16.054	25.071	24.5722
123.5	1.28674	1.333	2.84965	2.60957	5.4757	5.01897	9.46473	9.29747	17.5037	16.054	25.0709	24.5721
123.6	1.28674	1.33299	2.84965	2.60957	5.47567	5.01895	9.4647	9.29744	17.5036	16.0539	25.0709	24.5721
123.7	1.28674	1.33299	2.84964	2.60956	5.47566	5.01894	9.46467	9.29741	17.5036	16.0539	25.0708	24.572
123.8	1.28673	1.33298	2.84963	2.60955	5.47564	5.01892	9.46464	9.29738	17.5035	16.0538	25.0707	24.5719
123.9	1.28673	1.33298	2.84962	2.60954	5.47562	5.0189	9.46461	9.29735	17.5035	16.0538	25.0706	24.5718
124	1.28673	1.33298	2.84961	2.60953	5.47561	5.01889	9.46458	9.29732	17.5033	16.0537	25.0705	24.5717
124.1	1.28672	1.33297	2.8496	2.60952	5.47559	5.01887	9.46455	9.29729	17.5033	16.0537	25.0705	24.5717
124.2	1.28672	1.33297	2.84958	2.60951	5.47557	5.01885	9.46452	9.29726	17.5032	16.0536	25.0704	24.5716
124.3	1.28671	1.33296	2.84958	2.60951	5.47555	5.01884	9.46449	9.29723	17.5032	16.0536	25.0703	24.5715
124.4	1.28671	1.33296	2.84957	2.6095	5.47553	5.01882	9.46446	9.2972	17.5031	16.0535	25.0702	24.5714
124.5	1.2867	1.33295	2.84956	2.60949	5.47552	5.01881	9.46443	9.29717	17.5031	16.0535	25.0701	24.5713
124.6	1.2867	1.33295	2.84955	2.60948	5.4755	5.01879	9.4644	9.29714	17.503	16.0534	25.0701	24.5713
124.7	1.2867	1.33295	2.84954	2.60947	5.47548	5.01877	9.46437	9.29711	17.503	16.0534	25.07	24.5712
124.8	1.28669	1.33294	2.84953	2.60946	5.47547	5.01876	9.46433	9.29708	17.5029	16.0533	25.0699	24.5711
124.9	1.28669	1.33294	2.84953	2.60946	5.47545	5.01874	9.4643	9.29705	17.5029	16.0533	25.0698	24.571
125	1.28668	1.33293	2.84952	2.60945	5.47542	5.01872	9.46427	9.29702	17.5028	16.0532	25.0697	24.5709
125.1	1.28668	1.33293	2.84951	2.60944	5.47541	5.01871	9.46424	9.29699	17.5028	16.0532	25.0697	24.5709
125.2	1.28667	1.33292	2.8495	2.60943	5.47539	5.01869	9.46421	9.29696	17.5027	16.0531	25.0696	24.5708
125.3	1.28667	1.33292	2.84949	2.60942	5.47538	5.01868	9.46418	9.29693	17.5027	16.0531	25.0695	24.5707
125.4	1.28667	1.33292	2.84948	2.60941	5.47536	5.01866	9.46415	9.2969	17.5026	16.053	25.0694	24.5706
125.5	1.28666	1.33291	2.84948	2.60941	5.47534	5.01864	9.46412	9.29687	17.5026	16.053	25.0694	24.5706
125.6	1.28666	1.33291	2.84946	2.6094	5.47533	5.01863	9.46409	9.29684	17.5025	16.0529	25.0693	24.5705
125.7	1.28665	1.3329	2.84945	2.60939	5.4753	5.01861	9.46406	9.29681	17.5025	16.0529	25.0692	24.5704
125.8	1.28665	1.3329	2.84944	2.60938	5.47528	5.01859	9.46403	9.29678	17.5024	16.0528	25.0691	24.5703
125.9	1.28664	1.33289	2.84943	2.60937	5.47527	5.01858	9.464	9.29675	17.5024	16.0528	25.069	24.5702
126	1.28664	1.33289	2.84942	2.60936	5.47525	5.01856	9.46397	9.29672	17.5023	16.0527	25.069	24.5702
126.1	1.28664	1.33289	2.84941	2.60935	5.47524	5.01855	9.46394	9.29669	17.5021	16.0526	25.0689	24.5701
126.2	1.28663	1.33288	2.84941	2.60935	5.47522	5.01853	9.46391	9.29666	17.5021	16.0526	25.0688	24.57
126.3	1.28663	1.33288	2.8494	2.60934	5.47519	5.01851	9.46388	9.29663	17.502	16.0525	25.0687	24.5699
126.4	1.28662	1.33287	2.84939	2.60933	5.47518	5.0185	9.46385	9.2966	17.502	16.0525	25.0686	24.5698
126.5	1.28662	1.33287	2.84938	2.60932	5.47516	5.01848	9.46382	9.29657	17.5019	16.0524	25.0686	24.5698
126.6	1.28661	1.33286	2.84937	2.60931	5.47515	5.01847	9.46378	9.29654	17.5019	16.0524	25.0685	24.5697
126.7	1.28661	1.33286	2.84936	2.6093	5.47513	5.01845	9.46375	9.29651	17.5018	16.0523	25.0684	24.5696
126.8	1.28661	1.33286	2.84936	2.6093	5.47511	5.01843	9.46372	9.29648	17.5018	16.0523	25.0683	24.5695
126.9	1.2866	1.33285	2.84934	2.60929	5.4751	5.01842	9.46369	9.29645	17.5017	16.0522	25.0682	24.5694
127	1.2866	1.33285	2.84933	2.60928	5.47507	5.0184	9.46366	9.29642	17.5017	16.0522	25.0682	24.5694
127.1	1.28659	1.33284	2.84932	2.60927	5.47505	5.01838	9.46363	9.29639	17.5016	16.0521	25.0681	24.5693
127.2	1.28659	1.33284	2.84931	2.60926	5.47504	5.01837	9.4636	9.29636	17.5016	16.0521	25.068	24.5692
127.3	1.28658	1.33283	2.8493	2.60925	5.47502	5.01835	9.46357	9.29633	17.5015	16.052	25.0679	24.5691
127.4	1.28658	1.33283	2.8493	2.60925	5.47501	5.01834	9.46354	9.2963	17.5015	16.052	25.0678	24.569
127.5	1.28658	1.33283	2.84929	2.60924	5.47499	5.01832	9.46351	9.29627	17.5014	16.0519	25.0678	24.569
127.6	1.28657	1.33282	2.84928	2.60923	5.47497	5.0183	9.46348	9.29624	17.5014	16.0519	25.0676	24.5689
127.7	1.28657	1.33282	2.84927	2.60922	5.47495	5.01829	9.46345	9.29621	17.5013	16.0518	25.0675	24.5688
127.8	1.28656	1.33281	2.84926	2.60921	5.47493	5.01827	9.46342	9.29618	17.5013	16.0518	25.0674	24.5687
127.9	1.28656	1.33281	2.84925	2.6092	5.47491	5.01825	9.46339	9.29615	17.5012	16.0517	25.0673	24.5686
128	1.28655	1.3328	2.84924	2.60919	5.4749	5.01824	9.46336	9.29612	17.5012	16.0517	25.0673	24.5686
128.1	1.28655	1.3328	2.84924	2.60919	5.47488	5.01822	9.46333	9.29609	17.5011	16.0516	25.0672	24.5685
128.2	1.28655	1.3328	2.84922	2.60918	5.47487	5.01821	9.4633	9.29606	17.5011	16.0516	25.0671	24.5684
128.3	1.28654	1.33279	2.84921	2.60917	5.47485	5.01819	9.46327	9.29603	17.501	16.0515	25.067	24.5683
128.4	1.28654	1.33279	2.8492	2.60916	5.47482	5.01817	9.46324	9.296	17.501	16.0515	25.067	24.5683
128.5	1.28653	1.33278	2.84919	2.60915	5.47481	5.01816	9.4632	9.29597	17.5008	16.0514	25.0669	24.5682
128.6	1.28653	1.33278	2.84918	2.60914	5.47479	5.01814	9.46317	9.29594	17.5008	16.0514	25.0668	24.5681
128.7	1.28652	1.33277	2.84918	2.60914	5.47477	5.01812	9.46314	9.29591	17.5007	16.0513	25.0667	24.568
128.8	1.28652	1.33277	2.84917	2.60913	5.47476	5.01811	9.46311	9.29588	17.5006	16.0512	25.0666	24.5679
128.9	1.28652	1.33277	2.84916	2.60912	5.47474	5.01809	9.46308	9.29585	17.5006	16.0512	25.0666	24.5679
129	1.28651	1.33276	2.84915	2.60911	5.47473	5.01808	9.46305	9.29582	17.5005	16.0511	25.0665	24.5678
129.1	1.28651	1.33276	2.84914	2.6091	5.4747	5.01806	9.46302	9.29579	17.5005	16.0511	25.0664	24.5677
129.2	1.2865	1.33275	2.84913	2.60909	5.47468	5.01804	9.46299	9.29576	17.5004	16.051	25.0663	24.5676
129.3	1.2865	1.33275	2.84913	2.60909	5.47467	5.01803	9.46296	9.29573	17.5004	16.051	25.0662	24.5675
129.4	1.28649	1.33274	2.84912	2.60908	5.47465	5.01801	9.46293	9.2957	17.5003	16.0509	25.0662	24.5675
129.5	1.28649	1.33274	2.8491	2.60907	5.47464	5.018	9.4629	9.29567	17.5003	16.0509	25.0661	24.5674
129.6	1.28649	1.33274	2.84909	2.60906	5.47462	5.01798	9.46287	9.29564	17.5002	16.0508	25.066	24.5673
129.7	1.28648	1.33273	2.84908	2.60905	5.47459	5.01796	9.46284	9.29561	17.5002	16.0508	25.0659	24.5672
129.8	1.28648	1.33273	2.84907	2.60904	5.47458	5.01795	9.46281	9.29558	17.5001	16.0507	25.0658	24.5671
129.9	1.28647	1.33272	2.84906	2.60903	5.47456	5.01793	9.46278	9.29555	17.5001	16.0507	25.0658	24.5671
130	1.28647	1.33272	2.84906	2.60903	5.47454	5.01791	9.46275	9.29552	17.5	16.0506	25.0657	24.567
130.1	1.28646	1.33271	2.84905	2.60902	5.47453	5.0179	9.46272	9.29549	17.5	16.0506	25.0656	24.5669
130.2	1.28646	1.33271	2.84904	2.60901	5.47451	5.01788	9.46269	9.29546	17.4999	16.0505	25.0655	24.5668
130.3	1.28646	1.33271	2.84903	2.609	5.4745	5.01787	9.46265	9.29543	17.4999	16.0505	25.0654	24.5667
130.4	1.28646	1.3327	2.84902	2.60899	5.47447	5.01785	9.46262	9.2954	17.4998	16.0504	25.0654	24.5667
130.5	1.28646	1.3327	2.84901	2.60898	5.47445	5.01783	9.46259	9.29537	17.4998	16.0504	25.0653	24.5666
130.6	1.28645	1.33269	2.84901	2.60898	5.47444	5.01782	9.46256	9.29534	17.4996	16.0503	25.0652	24.5665
130.7	1.28645	1.33269	2.849	2.60897	5.47442	5.0178	9.46253	9.29531	17.4996	16.0503	25.0651	24.5664
130.8	1.28644	1.33268	2.84898	2.60896	5.4744	5.01778	9.4625	9.29528	17.4995	16.0502	25.065	24.5663
130.9	1.28644	1.33268	2.84897	2.60895	5.47439	5.01777	9.46247	9.29525	17.4995	16.0502	25.065	24.5663
131	1.28643	1.33267	2.84896	2.60894	5.47437	5.01775	9.46244	9.29522	17.4994	16.0501	25.0649	24.5662
131.1	1.28643	1.33267	2.84895	2.60893	5.47435	5.01774	9.46241	9.29519	17.4994	16.0501	25.0648	24.5661
131.2	1.28643	1.33267	2.84895	2.60893	5.47433	5.01772	9.46238	9.29516	17.4993	16.05	25.0647	24.566
131.3	1.28642	1.33266	2.84894	2.60892	5.47431	5.0177	9.46235	9.29513	17.4993	16.05	25.0647	24.566
131.4	1.28642	1.33266	2.84893	2.60891	5.4743	5.01769	9.46232	9.2951	17.4992	16.0499	25.0646	24.5659
131.5	1.28641	1.33265	2.84892	2.6089	5.47428	5.01767	9.46229	9.29507	17.4991	16.0498	25.0645	24.5658
131.6	1.28641	1.33265	2.84891	2.60889	5.47426	5.01765	9.46226	9.29504	17.4991	16.0498	25.0644	24.5657
131.7	1.2864	1.33264	2.8489	2.60888	5.47425	5.01764	9.46223	9.29501	17.499	16.0497	25.0643	24.5656
131.8	1.2864	1.33264	2.84889	2.60887	5.47422	5.01762	9.4622	9.29498	17.499	16.0497	25.0643	24.5656
131.9	1.2864	1.33264	2.84889	2.60887	5.47421	5.01761	9.46217	9.29495	17.4989	16.0496	25.0642	24.5655
132	1.28639	1.33263	2.84888	2.60886	5.47419	5.01759	9.46214	9.29492	17.4989	16.0496	25.0641	24.5654
132.1	1.28639	1.33263	2.84886	2.60885	5.47417	5.01757	9.46211	9.29489	17.4988	16.0495	25.064	24.5653
132.2	1.28638	1.33262	2.84885	2.60884	5.47416	5.01756	9.46207	9.29486	17.4988	16.0495	25.0639	24.5652
132.3	1.28638	1.33262	2.84884	2.60883	5.47414	5.01754	9.46204	9.29483	17.4987	16.0494	25.0639	24.5652
132.4	1.28637	1.33261	2.84883	2.60882	5.47413	5.01753	9.46201	9.2948	17.4987	16.0494	25.0638	24.5651
132.5	1.28637	1.33261	2.84883	2.60882	5.4741	5.01751	9.46198	9.29477	17.4986	16.0493	25.0637	24.565
132.6	1.28637	1.33261	2.84882	2.60881	5.47408	5.01749	9.46195	9.29474	17.4986	16.0493	25.0636	24.5649
132.7	1.28636	1.3326	2.84881	2.6088	5.47407	5.01748	9.46192	9.29471	17.4984	16.0492	25.0635	24.5648
132.8	1.28636	1.3326	2.8488	2.60879	5.47405	5.01746	9.46189	9.29468	17.4984	16.0492	25.0635	24.5648
132.9	1.28635	1.33259	2.84879	2.60878	5.47403	5.01744	9.46186	9.29465	17.4983	16.0491	25.0634	24.5647
133	1.28635	1.33259	2.84878	2.60877	5.47402	5.01743	9.46183	9.29462	17.4983	16.0491	25.0633	24.5646
133.1	1.28634	1.33258	2.84877	2.60876	5.47399	5.01741	9.4618	9.29459	17.4982	16.049	25.0632	24.5645
133.2	1.28634	1.33258	2.84877	2.60876	5.47398	5.0174	9.46177	9.29456	17.4982	16.049	25.0631	24.5644
133.3	1.28634	1.33258	2.84876	2.60875	5.47396	5.01738	9.46174	9.29453	17.4981	16.0489	25.0631	24.5644
133.4	1.28633	1.33257	2.84874	2.60874	5.47394	5.01736	9.46171	9.2945	17.4981	16.0489	25.063	24.5643
133.5	1.28633	1.33257	2.84873	2.60873	5.47393	5.01735	9.46168	9.29447	17.498	16.0488	25.0629	24.5642
133.6	1.28632	1.33256	2.84872	2.60872	5.47391	5.01733	9.46165	9.29444	17.498	16.0488	25.0628	24.5641
133.7	1.28632	1.33256	2.84871	2.60871	5.47389	5.01731	9.46162	9.29441	17.4979	16.0487	25.0626	24.564
133.8	1.28631	1.33255	2.84871	2.60871	5.47387	5.0173	9.46159	9.29438	17.4979	16.0487	25.0626	24.564
133.9	1.28631	1.33255	2.8487	2.6087	5.47385	5.01728	9.46156	9.29435	17.4978	16.0486	25.0625	24.5639
134	1.28631	1.33255	2.84869	2.60869	5.47384	5.01727	9.46152	9.29432	17.4978	16.0486	25.0624	24.5638
134.1	1.2863	1.33254	2.84868	2.60868	5.47382	5.01725	9.46149	9.29429	17.4977	16.0485	25.0623	24.5637
134.2	1.2863	1.33254	2.84867	2.60867	5.4738	5.01723	9.46146	9.29426	17.4976	16.0484	25.0623	24.5637
134.3	1.28629	1.33253	2.84866	2.60866	5.47379	5.01722	9.46143	9.29423	17.4976	16.0484	25.0622	24.5636
134.4	1.28629	1.33253	2.84866	2.60866	5.47377	5.0172	9.4614	9.2942	17.4975	16.0483	25.0621	24.5635
134.5	1.28628	1.33252	2.84865	2.60865	5.47375	5.01719	9.46137	9.29417	17.4975	16.0483	25.062	24.5634
134.6	1.28628	1.33252	2.84863	2.60864	5.47373	5.01717	9.46134	9.29414	17.4974	16.0482	25.0619	24.5633
134.7	1.28628	1.33252	2.84862	2.60863	5.47371	5.01715	9.46131	9.29411	17.4974	16.0482	25.0619	24.5633
134.8	1.28627	1.33251	2.84861	2.60862	5.4737	5.01714	9.46128	9.29408	17.4972	16.0481	25.0618	24.5632
134.9	1.28627	1.33251	2.8486	2.60861	5.47368	5.01712	9.46125	9.29405	17.4972	16.0481	25.0617	24.5631
135	1.28626	1.3325	2.84859	2.6086	5.47366	5.0171	9.46122	9.29402	17.4971	16.048	25.0616	24.563
135.1	1.28626	1.3325	2.84859	2.6086	5.47365	5.01709	9.46119	9.29399	17.4971	16.048	25.0615	24.5629
135.2	1.28625	1.33249	2.84858	2.60859	5.47362	5.01707	9.46116	9.29396	17.497	16.0479	25.0615	24.5629
135.3	1.28625	1.33249	2.84857	2.60858	5.47361	5.01706	9.46113	9.29393	17.497	16.0479	25.0614	24.5628
135.4	1.28625	1.33249	2.84856	2.60857	5.47359	5.01704	9.4611	9.2939	17.4969	16.0478	25.0613	24.5627
135.5	1.28624	1.33248	2.84855	2.60856	5.47357	5.01702	9.46107	9.29387	17.4969	16.0478	25.0612	24.5626
135.6	1.28624	1.33248	2.84854	2.60855	5.47356	5.01701	9.46104	9.29384	17.4968	16.0477	25.0611	24.5625
135.7	1.28623	1.33247	2.84854	2.60855	5.47354	5.01699	9.46101	9.29381	17.4968	16.0477	25.0611	24.5625
135.8	1.28623	1.33247	2.84853	2.60854	5.47351	5.01697	9.46098	9.29378	17.4967	16.0476	25.061	24.5624
[truncated: 2,248 more rows]

## Sheet: Fig 4-fig sup2 GH GAL
Cycle: 9 GH 0.23 µM_X	Cycle: 9 GH 0.23 µM_Y	Fitted Cycle: 9 GH 0.23 µM_Y	Cycle: 10 GH 0.46 µM_Y	Fitted Cycle: 10 GH 0.46 µM_Y	Cycle: 11 GH 0.93 µM_Y	Fitted Cycle: 11 GH 0.93 µM_Y	Cycle: 12 GH 1.87 µM_Y	Fitted Cycle: 12 GH 1.87 µM_Y	Cycle: 13 GH 3.75 µM_Y	Fitted Cycle: 13 GH 3.75 µM_Y	Cycle: 14 GH 7.5 µM_Y	Fitted Cycle: 14 GH 7.5 µM_Y	Cycle: 15 GH 15 µM_Y	Fitted Cycle: 15 GH 15 µM_Y	Cycle: 16 GH 30 µM_Y	Fitted Cycle: 16 GH 30 µM_Y	Cycle: 17 GH 60 µM_Y	Fitted Cycle: 17 GH 60 µM_Y	Cycle: 18 GH 120 µM_Y	Fitted Cycle: 18 GH 120 µM_Y
[truncated: 7,205 more rows]
