# Supplementary material for: Co-aggregation and secondary nucleation in the life cycle of human prolactin/galanin functional amyloids
Source: eLife. 2022 Mar 8;11:e73835. doi: 10.7554/eLife.73835 (PMC8993219; doi:10.7554/eLife.73835)
Supplement: Figure 4—source data 1. [file elife-73835-fig4-data1.xlsx]

## Sheet: Figure 4a
			Day 0								Day 15
			Set 1	Set 2	Set 3		Mean	StdEv	StdErr		Set 1	Set 2	Set 3		Mean	STDEV	Std Err		Day 0 to Day 15	p value
		PRL+GAL	265.297	306.971	308.074		293.447	24.3851	14.0792		986.628	1194.38	1217.25		1132.75	127.063	73.3622		***	0.00036
		GAL+Hep	321.941	280.151	221.257		274.45	50.5836	29.2053		1022.93	1206.84	1319.14		1182.97	149.541	86.3399		***	0.0006
		PRL+CSA	228.078	236.202	185.414		216.565	27.2814	15.7514		1167.99	1348.66	1320.51		1279.05	97.208	56.1247		***	0.0001
		ACTH	246.592	208.306	243.209		232.702	21.1954	12.2376		285.44	247.086	297.946		276.824	26.5021	15.3014		ns	0.0875
		GH+GAL	169.602	182.45	236.837		196.296	35.6921	20.6075		367.676	372.578	169.658		303.304	115.767	66.8399		ns	0.2008
		PRL+ACTH	211.333	213.452	164.257		196.347	27.8112	16.0573		220.296	239.396	319.973		259.888	52.9039	30.545		ns	0.1394
		GH	221.555	238.592	242.226		234.124	11.036	6.37181		244.119	282.82	262.253		263.064	19.3632	11.1797		ns	0.0877
		PRL	252.921	294.792	297.53		281.748	25.0021	14.4354		266.467	303.958	313.704		294.71	24.9396	14.3993		ns	0.5595
		GAL	260.005	270.877	189.605		240.162	44.1201	25.4735		364.718	210.422	268.505		281.215	77.9293	44.9938		ns	0.4716

## Sheet: Figure 4c left panel
Time in seconds	PRL GAL 124.8 μM non-fitted (thick)	PRL GAL 124.8 μM fitted (thin)	PRL-ACTH 124.8 µM non-fitted (thick)	PRL-ACTH 124.8 µM fitted (thin)	GH-GAL 120 µM non-fitted (thick)	GH-GAL 120 µM fitted (thin)
-59.7	0.0976563	0	-0.0341797	0	0.0184766	0
-59.6	0.130858	0	-0.0566406	0	0.0172657	0
-59.5	0.146484	0	-0.0615234	0	0.0169336	0
-59.4	0.158203	0	-0.0546875	0	0.0166211	0
-59.3	0.158203	0	-0.0527344	0	0.0166602	0
-59.2	0.148438	0	-0.0517578	0	0.0167383	0
-59.1	0.158203	0	-0.0283206	0	0.0167578	0
-59	0.146484	0	-0.0371094	0	0.0167578	0
-58.9	0.148437	0	-0.0380862	0	0.0167188	0
-58.8	0.148438	0	-0.0410156	0	0.0166602	0
-58.7	0.130859	0	-0.0449219	0	0.016582	0
-58.6	0.117187	0	-0.0517579	0	0.0165234	0
-58.5	0.117188	0	-0.046875	0	0.0164453	0
-58.4	0.109375	0	-0.0634766	0	0.0163281	0
-58.3	0.101562	0	-0.0615236	0	0.0161328	0
-58.2	0.107422	0	-0.0625	0	0.0160938	0
-58.1	0.107422	0	-0.0683594	0	0.015957	0
-58	0.105469	0	-0.0605469	0	0.0158203	0
-57.9	0.105469	0	-0.0576171	0	0.0157227	0
-57.8	0.103515	0	-0.0527345	0	0.0156836	0
-57.7	0.103516	0	-0.0507813	0	0.0156445	0
-57.6	0.109375	0	-0.0449219	0	0.015625	0
-57.5	0.0976563	0	-0.0429688	0	0.0155273	0
-57.4	0.105469	0	-0.0410156	0	0.0154688	0
-57.3	0.0976565	0	-0.0478516	0	0.0156445	0
-57.2	0.103516	0	-0.0478516	0	0.0155469	0
-57.1	0.113281	0	-0.0371095	0	0.0154688	0
-57	0.101563	0	-0.0449219	0	0.0154883	0
-56.9	0.101563	0	-0.0400391	0	0.0154688	0
-56.8	0.0996091	0	-0.0380859	0	0.0153711	0
-56.7	0.0917969	0	-0.0419922	0	0.0152734	0
-56.6	0.097656	0	-0.0361329	0	0.0151563	0
-56.5	0.0976563	0	-0.0400391	0	0.0151172	0
-56.4	0.0859377	0	-0.0371094	0	0.0150195	0
-56.3	0.0937498	0	-0.0419923	0	0.0149609	0
-56.2	0.0859375	0	-0.0419922	0	0.0148633	0
-56.1	0.0976558	0	-0.0439454	0	0.0147656	0
-56	0.0859375	0	-0.0371094	0	0.014707	0
-55.9	0.0917969	0	-0.0458986	0	0.0146094	0
-55.8	0.095703	0	-0.0429688	0	0.0146094	0
-55.7	0.0917969	0	-0.0380859	0	0.0145117	0
-55.6	0.0917971	0	-0.0449219	0	0.0144141	0
-55.5	0.0976563	0	-0.0527344	0	0.0143555	0
-55.4	0.0917969	0	-0.0458986	0	0.0143164	0
-55.3	0.097656	0	-0.0429688	0	0.0142188	0
-55.2	0.101563	0	-0.0380859	0	0.0142773	0
-55.1	0.105469	0	-0.0380859	0	0.0142383	0
-55	0.0976563	0	-0.0351563	0	0.0141797	0
-54.9	0.103515	0	-0.0351563	0	0.014082	0
-54.8	0.0917971	0	-0.0322267	0	0.0140234	0
-54.7	0.0976563	0	-0.0400391	0	0.0139258	0
-54.6	0.0898438	0	-0.0400391	0	0.0138867	0
-54.5	0.09375	0	-0.0351563	0	0.0138281	0
-54.4	0.0859374	0	-0.0410156	0	0.0137305	0
-54.3	0.103516	0	-0.0351564	0	0.0136328	0
-54.2	0.0976563	0	-0.0332031	0	0.0135742	0
-54.1	0.0976564	0	-0.0332031	0	0.0134961	0
-54	0.101563	0	-0.0302734	0	0.0134375	0
-53.9	0.0937501	0	-0.0234376	0	0.0133398	0
-53.8	0.0917966	0	-0.0205078	0	0.0133398	0
-53.7	0.0917969	0	-0.0205078	0	0.0132227	0
-53.6	0.103515	0	-0.029297	0	0.0131836	0
-53.5	0.0957031	0	-0.0292969	0	0.0130859	0
-53.4	0.0917972	0	-0.0234375	0	0.0130273	0
-53.3	0.101562	0	-0.0205079	0	0.0130469	0
-53.2	0.09375	0	-0.0263672	0	0.0129883	0
-53.1	0.103515	0	-0.022461	0	0.0128906	0
-53	0.0917969	0	-0.0292969	0	0.012832	0
-52.9	0.101562	0	-0.0234376	0	0.0127734	0
-52.8	0.105469	0	-0.0244141	0	0.0127734	0
-52.7	0.103516	0	-0.0214844	0	0.0126758	0
-52.6	0.109375	0	-0.0185548	0	0.0127539	0
-52.5	0.117188	0	-0.0185547	0	0.0126563	0
-52.4	0.117188	0	-0.0214844	0	0.0127734	0
-52.3	0.111328	0	-0.0195311	0	0.0125977	0
-52.2	0.111328	0	-0.0244141	0	0.0126172	0
-52.1	0.111328	0	-0.0273438	0	0.0125586	0
-52	0.105469	0	-0.0390625	0	0.0124414	0
-51.9	0.105469	0	-0.0390625	0	0.0123828	0
-51.8	0.111328	0	-0.0390625	0	0.0123438	0
-51.7	0.103516	0	-0.0341797	0	0.0122852	0
-51.6	0.109375	0	-0.0429689	0	0.012168	0
-51.5	0.109375	0	-0.0400391	0	0.0120703	0
-51.4	0.109375	0	-0.0449219	0	0.0121094	0
-51.3	0.113281	0	-0.0449219	0	0.0119727	0
-51.2	0.123047	0	-0.0517579	0	0.0119922	0
-51.1	0.117187	0	-0.044922	0	0.0119336	0
-51	0.121094	0	-0.0419922	0	0.0119922	0
-50.9	0.126953	0	-0.0390625	0	0.0119922	0
-50.8	0.130859	0	-0.0371094	0	0.0118164	0
-50.7	0.136719	0	-0.0371095	0	0.011875	0
-50.6	0.142578	0	-0.0351563	0	0.011875	0
-50.5	0.142578	0	-0.0332031	0	0.0117773	0
-50.4	0.146484	0	-0.0332031	0	0.0118164	0
-50.3	0.146484	0	-0.0390625	0	0.0118164	0
-50.2	0.138672	0	-0.0390625	0	0.0117969	0
-50.1	0.138672	0	-0.0361328	0	0.0117383	0
-50	0.144531	0	-0.0332031	0	0.0116211	0
-49.9	0.142578	0	-0.0351563	0	0.0116211	0
-49.8	0.142578	0	-0.0380859	0	0.0115039	0
-49.7	0.148437	0	-0.0498047	0	0.0114258	0
-49.6	0.152344	0	-0.0458985	0	0.0114844	0
-49.5	0.144531	0	-0.0400391	0	0.0114453	0
-49.4	0.150391	0	-0.0449219	0	0.0112695	0
-49.3	0.15625	0	-0.0419922	0	0.0112305	0
-49.2	0.15625	0	-0.0419922	0	0.01125	0
-49.1	0.160156	0	-0.0478516	0	0.0111133	0
-49	0.152344	0	-0.0498047	0	0.0110938	0
-48.9	0.162109	0	-0.0498047	0	0.010918	0
-48.8	0.162109	0	-0.0576172	0	0.0108789	0
-48.7	0.162109	0	-0.0449219	0	0.0107617	0
-48.6	0.16211	0	-0.0468751	0	0.0106836	0
-48.5	0.160156	0	-0.0322266	0	0.0106836	0
-48.4	0.175781	0	-0.0332031	0	0.0105078	0
-48.3	0.1875	0	-0.0419922	0	0.0102734	0
-48.2	0.189453	0	-0.0419921	0	0.0101953	0
-48.1	0.1875	0	-0.0498046	0	0.0100195	0
-48	0.177734	0	-0.0537109	0	0.00994141	0
-47.9	0.181641	0	-0.0585938	0	0.00982422	0
-47.8	0.177734	0	-0.0703125	0	0.00970704	0
-47.7	0.171875	0	-0.0722656	0	0.00962891	0
-47.6	0.171875	0	-0.0605469	0	0.00943359	0
-47.5	0.171875	0	-0.0585938	0	0.00931641	0
-47.4	0.177734	0	-0.0507813	0	0.00912109	0
-47.3	0.1875	0	-0.257813	0	0.00898438	0
-47.2	0.18164	0	-0.302734	0	0.00888672	0
-47.1	0.13672	0	-0.352539	0	0.00863281	0
-47	0.117188	0	-0.405273	0	0.00851563	0
-46.9	0.0429688	0	-0.455078	0	0.00833984	0
-46.8	-0.0996099	0	-0.516602	0	0.00810547	0
-46.7	-0.248046	0	-0.541016	0	0.00800781	0
-46.6	-0.363278	0	-0.558594	0	0.00789062	0
-46.5	-0.416016	0	-0.582031	0	0.00771484	0
-46.4	-0.484375	0	-0.601563	0	0.00746094	0
-46.3	-0.533202	0	-0.604492	0	0.00738281	0
-46.2	-0.558594	0	-0.609375	0	0.00732422	0
-46.1	-0.605467	0	-0.623047	0	0.00720703	0
-46	-0.601563	0	-0.620117	0	0.00716797	0
-45.9	-0.626953	0	-0.62793	0	0.00714844	0
-45.8	-0.654297	0	-0.647461	0	0.00697266	0
-45.7	-0.669921	0	-0.660156	0	0.00701172	0
-45.6	-0.667969	0	-0.655273	0	0.00689454	0
-45.5	-0.677734	0	-0.678711	0	0.00681641	0
-45.4	-0.689453	0	-0.685547	0	0.00691406	0
-45.3	-0.685546	0	-0.686523	0	0.0069336	0
-45.2	-0.671876	0	-0.671875	0	0.00693359	0
-45.1	-0.677734	0	-0.626953	0	0.00689453	0
-45	-0.654297	0	-0.55957	0	0.00705078	0
-44.9	-0.646484	0	-0.362305	0	0.00703125	0
-44.8	-0.63867	0	-0.364258	0	0.00701172	0
-44.7	-0.564454	0	-0.349609	0	0.00710938	0
-44.6	-0.509763	0	-0.311524	0	0.00712891	0
-44.5	-0.355469	0	-0.306641	0	0.00722656	0
-44.4	-0.228516	0	-0.291016	0	0.00716797	0
-44.3	-0.074224	0	-0.272461	0	0.00712891	0
-44.2	-0.0292986	0	-0.235352	0	0.00724609	0
-44.1	-0.00390691	0	-0.212891	0	0.00712891	0
-44	-0.00390625	0	-0.179688	0	0.00716797	0
-43.9	0.00195313	0	-0.145508	0	0.00710938	0
-43.8	0.031249	0	-0.109375	0	0.00708985	0
-43.7	0.0468739	0	-0.118164	0	0.00714844	0
-43.6	0.0214853	0	-0.133789	0	0.00705078	0
-43.5	0.0351563	0	-0.136719	0	0.00699219	0
-43.4	0.0625	0	-0.183594	0	0.00691406	0
-43.3	0.0820308	0	-0.191407	0	0.00683594	0
-43.2	0.126953	0	-0.225587	0	0.00671875	0
-43.1	0.205077	0	-0.256837	0	0.00667969	0
-43	0.3125	0	-0.282227	0	0.00664063	0
-42.9	0.396484	0	-0.330078	0	0.00658203	0
-42.8	0.492186	0	-0.330079	0	0.00658203	0
-42.7	0.55859	0	-0.34668	0	0.00642578	0
-42.6	0.556638	0	-0.374024	0	0.00638672	0
-42.5	0.482422	0	-0.417969	0	0.00638672	0
-42.4	0.382813	0	-0.404297	0	0.00632813	0
-42.3	0.246096	0	-0.388671	0	0.00621094	0
-42.2	0.167969	0	-0.351563	0	0.00632813	0
-42.1	0.0898445	0	-0.291992	0	0.00617188	0
-42	0.0292969	0	-0.236328	0	0.00611328	0
-41.9	-0.0273438	0	-0.204102	0	0.00611328	0
-41.8	-0.0781244	0	-0.171875	0	0.00609375	0
-41.7	-0.132812	0	-0.167969	0	0.00603516	0
-41.6	-0.183594	0	-0.157227	0	0.00603516	0
-41.5	-0.191406	0	-0.15332	0	0.00605469	0
-41.4	-0.175781	0	-0.132813	0	0.0059375	0
-41.3	-0.197265	0	-0.136719	0	0.00591797	0
-41.2	-0.208984	0	-0.135742	0	0.00585938	0
-41.1	-0.1875	0	-0.134766	0	0.00585938	0
-41	-0.164063	0	-0.131836	0	0.00587891	0
-40.9	-0.152344	0	-0.133789	0	0.00583984	0
-40.8	-0.148438	0	-0.138672	0	0.00566407	0
-40.7	-0.154297	0	-0.150391	0	0.00572266	0
-40.6	-0.146484	0	-0.158203	0	0.0056836	0
-40.5	-0.142578	0	-0.160156	0	0.00572266	0
-40.4	-0.166016	0	-0.163086	0	0.00578125	0
-40.3	-0.177734	0	-0.164062	0	0.00560547	0
-40.2	-0.18164	0	-0.182617	0	0.00564453	0
-40.1	-0.181641	0	-0.182617	0	0.00552734	0
-40	-0.185547	0	-0.194336	0	0.00552734	0
-39.9	-0.173828	0	-0.195313	0	0.00552734	0
-39.8	-0.173828	0	-0.199219	0	0.00546875	0
-39.7	-0.173828	0	-0.203125	0	0.00552734	0
-39.6	-0.167969	0	-0.214844	0	0.00537109	0
-39.5	-0.167969	0	-0.209961	0	0.0053125	0
-39.4	-0.171875	0	-0.227539	0	0.00529297	0
-39.3	-0.166016	0	-0.21582	0	0.00529297	0
-39.2	-0.171875	0	-0.223633	0	0.00523438	0
-39.1	-0.171875	0	-0.227539	0	0.00523438	0
-39	-0.171875	0	-0.228516	0	0.00511719	0
-38.9	-0.179688	0	-0.231445	0	0.00511719	0
-38.8	-0.173828	0	-0.228516	0	0.00498047	0
-38.7	-0.173828	0	-0.233398	0	0.00486328	0
-38.6	-0.175781	0	-0.25	0	0.00486328	0
-38.5	-0.175781	0	-0.25	0	0.00474609	0
-38.4	-0.175781	0	-0.260742	0	0.0046875	0
-38.3	-0.177735	0	-0.264648	0	0.0046875	0
-38.2	-0.183594	0	-0.270508	0	0.00451172	0
-38.1	-0.183594	0	-0.28418	0	0.0044336	0
-38	-0.195313	0	-0.279297	0	0.00447266	0
-37.9	-0.195313	0	-0.28125	0	0.00431641	0
-37.8	-0.183594	0	-0.28418	0	0.00431641	0
-37.7	-0.1875	0	-0.289062	0	0.00423828	0
-37.6	-0.199219	0	-0.291992	0	0.00423828	0
-37.5	-0.199219	0	-0.303711	0	0.00412109	0
-37.4	-0.207031	0	-0.300781	0	0.00412109	0
-37.3	-0.203125	0	-0.293945	0	0.00400391	0
-37.2	-0.21875	0	-0.295898	0	0.00388672	0
-37.1	-0.21875	0	-0.291016	0	0.00382813	0
-37	-0.21875	0	-0.289063	0	0.00382813	0
-36.9	-0.220703	0	-0.291992	0	0.00375	0
-36.8	-0.220703	0	-0.289063	0	0.00367188	0
-36.7	-0.220703	0	-0.298828	0	0.00355469	0
-36.6	-0.216797	0	-0.295898	0	0.00355469	0
-36.5	-0.216797	0	-0.304688	0	0.00359375	0
-36.4	-0.224609	0	-0.310547	0	0.00351563	0
-36.3	-0.21875	0	-0.308594	0	0.00357422	0
-36.2	-0.208985	0	-0.305664	0	0.00347656	0
-36.1	-0.203125	0	-0.299805	0	0.00351563	0
-36	-0.197266	0	-0.297852	0	0.00357422	0
-35.9	-0.197266	0	-0.292969	0	0.00353516	0
-35.8	-0.185547	0	-0.299805	0	0.00353516	0
-35.7	-0.19336	0	-0.294922	0	0.00337891	0
-35.6	-0.1875	0	-0.289063	0	0.00347656	0
-35.5	-0.179688	0	-0.285156	0	0.00345703	0
-35.4	-0.185547	0	-0.283203	0	0.00332031	0
-35.3	-0.1875	0	-0.285156	0	0.00337891	0
-35.2	-0.177735	0	-0.272461	0	0.00330078	0
-35.1	-0.179688	0	-0.277344	0	0.00322266	0
-35	-0.1875	0	-0.272461	0	0.00328125	0
-34.9	-0.181641	0	-0.267578	0	0.00328125	0
-34.8	-0.171875	0	-0.262695	0	0.00328125	0
-34.7	-0.177735	0	-0.256836	0	0.00332031	0
-34.6	-0.173828	0	-0.25	0	0.00326172	0
-34.5	-0.173828	0	-0.258789	0	0.00332031	0
-34.4	-0.175781	0	-0.255859	0	0.00333984	0
-34.3	-0.179688	0	-0.251953	0	0.00337891	0
-34.2	-0.173828	0	-0.25	0	0.00326172	0
-34.1	-0.164063	0	-0.244141	0	0.00330078	0
-34	-0.171875	0	-0.244141	0	0.00335938	0
-33.9	-0.177734	0	-0.249023	0	0.00332031	0
-33.8	-0.171875	0	-0.241211	0	0.00333985	0
-33.7	-0.171875	0	-0.241211	0	0.00328125	0
-33.6	-0.166016	0	-0.25293	0	0.00332031	0
-33.5	-0.158203	0	-0.248047	0	0.00330078	0
-33.4	-0.169922	0	-0.246094	0	0.00333984	0
-33.3	-0.164063	0	-0.243164	0	0.00328125	0
-33.2	-0.164062	0	-0.243164	0	0.00316406	0
-33.1	-0.154297	0	-0.239258	0	0.00326172	0
-33	-0.154297	0	-0.237305	0	0.00326172	0
-32.9	-0.150391	0	-0.234375	0	0.00324219	0
-32.8	-0.152344	0	-0.228516	0	0.00328125	0
-32.7	-0.152344	0	-0.228516	0	0.00316406	0
-32.6	-0.146485	0	-0.223633	0	0.00326172	0
-32.5	-0.158203	0	-0.220703	0	0.00322266	0
-32.4	-0.158203	0	-0.223633	0	0.00328125	0
-32.3	-0.144532	0	-0.21582	0	0.00320313	0
-32.2	-0.146484	0	-0.209961	0	0.00326172	0
-32.1	-0.142578	0	-0.208008	0	0.00328125	0
-32	-0.136719	0	-0.216797	0	0.00330078	0
-31.9	-0.132813	0	-0.217773	0	0.00322266	0
-31.8	-0.132813	0	-0.212891	0	0.00328125	0
-31.7	-0.132812	0	-0.212891	0	0.00320313	0
-31.6	-0.132813	0	-0.207031	0	0.00330078	0
-31.5	-0.128906	0	-0.207031	0	0.00328125	0
-31.4	-0.128906	0	-0.212891	0	0.00333984	0
-31.3	-0.136719	0	-0.206055	0	0.00326172	0
-31.2	-0.136719	0	-0.204102	0	0.00332031	0
-31.1	-0.125	0	-0.193359	0	0.00328125	0
-31	-0.121094	0	-0.188477	0	0.00333984	0
-30.9	-0.121094	0	-0.188477	0	0.00330078	0
-30.8	-0.111328	0	-0.185547	0	0.00332031	0
-30.7	-0.123047	0	-0.182617	0	0.00330078	0
-30.6	-0.113282	0	-0.180664	0	0.00322266	0
-30.5	-0.113281	0	-0.180664	0	0.00322266	0
-30.4	-0.113281	0	-0.178711	0	0.00328125	0
-30.3	-0.103516	0	-0.164063	0	0.00324219	0
-30.2	-0.105469	0	-0.169922	0	0.003125	0
-30.1	-0.105469	0	-0.158203	0	0.00318359	0
-30	-0.105469	0	-0.15625	0	0.00322266	0
-29.9	-0.0976563	0	-0.166016	0	0.00310547	0
-29.8	-0.091797	0	-0.161133	0	0.00316406	0
-29.7	-0.0859375	0	-0.158203	0	0.00308594	0
-29.6	-0.0800782	0	-0.15332	0	0.003125	0
-29.5	-0.0878907	0	-0.150391	0	0.00300781	0
-29.4	-0.0878905	0	-0.158203	0	0.00298828	0
-29.3	-0.0781252	0	-0.155273	0	0.00304687	0
-29.2	-0.078125	0	-0.151367	0	0.00296875	0
-29.1	-0.0722657	0	-0.150391	0	0.00292969	0
-29	-0.0683594	0	-0.147461	0	0.00283203	0
-28.9	-0.0683593	0	-0.143555	0	0.00291016	0
-28.8	-0.0625001	0	-0.143555	0	0.00289062	0
-28.7	-0.0566407	0	-0.140625	0	0.00289063	0
-28.6	-0.0488282	0	-0.132813	0	0.00287109	0
-28.5	-0.0429689	0	-0.144531	0	0.00292969	0
-28.4	-0.0429686	0	-0.152344	0	0.00285156	0
-28.3	-0.0371094	0	-0.152344	0	0.00283203	0
-28.2	-0.0390627	0	-0.147461	0	0.00277344	0
-28.1	-0.0390623	0	-0.144531	0	0.00277344	0
-28	-0.0410157	0	-0.141602	0	0.0028125	0
-27.9	-0.0371094	0	-0.139648	0	0.00279297	0
-27.8	-0.0273441	0	-0.130859	0	0.00279297	0
-27.7	-0.0273438	0	-0.129883	0	0.00271484	0
-27.6	-0.0214846	0	-0.126953	0	0.00271485	0
-27.5	-0.0175781	0	-0.12207	0	0.00273438	0
-27.4	-0.0253906	0	-0.120117	0	0.00257813	0
-27.3	-0.0136723	0	-0.117188	0	0.00261719	0
-27.2	-0.0136719	0	-0.12207	0	0.00255859	0
-27.1	-0.00390662	0	-0.119141	0	0.00248047	0
-27	0	0	-0.115234	0	0.00248047	0
-26.9	0.00585915	0	-0.112305	0	0.00248047	0
-26.8	0.0058596	0	-0.120117	0	0.00240234	0
-26.7	0.0175781	0	-0.114258	0	0.00232422	0
-26.6	0.0175778	0	-0.109375	0	0.00238281	0
-26.5	0.0175781	0	-0.109375	0	0.00222656	0
-26.4	0.0234374	0	-0.105469	0	0.00230469	0
-26.3	0.033203	0	-0.0996095	0	0.00222656	0
-26.2	0.0390625	0	-0.0996094	0	0.00228516	0
-26.1	0.03125	0	-0.0947266	0	0.00216797	0
-26	0.0351563	0	-0.104492	0	0.00208984	0
-25.9	0.0468746	0	-0.0996095	0	0.00207031	0
-25.8	0.0468751	0	-0.0947266	0	0.00207031	0
-25.7	0.0507813	0	-0.0947266	0	0.00210938	0
-25.6	0.0566404	0	-0.0888672	0	0.00210937	0
-25.5	0.0527344	0	-0.0849609	0	0.00208984	0
-25.4	0.0585937	0	-0.0849609	0	0.00207031	0
-25.3	0.0566403	0	-0.0820314	0	0.00195313	0
-25.2	0.0566406	0	-0.0761719	0	0.00193359	0
-25.1	0.0566406	0	-0.0761719	0	0.00197265	0
-25	0.0625	0	-0.0693359	0	0.00197266	0
-24.9	0.0683592	0	-0.0546875	0	0.00191406	0
-24.8	0.0683594	0	-0.0517578	0	0.00195313	0
-24.7	0.0722656	0	-0.046875	0	0.00193359	0
-24.6	0.0722658	0	-0.0566406	0	0.00185547	0
-24.5	0.0761719	0	-0.0449219	0	0.00191406	0
-24.4	0.0761719	0	-0.0390625	0	0.00191406	0
-24.3	0.0820313	0	-0.0371095	0	0.00183594	0
-24.2	0.0878906	0	-0.0371094	0	0.00189453	0
-24.1	0.0878906	0	-0.0371094	0	0.00189453	0
-24	0.0917969	0	-0.0322266	0	0.00193359	0
-23.9	0.0917969	0	-0.0214844	0	0.00193359	0
-23.8	0.0917969	0	-0.0214844	0	0.00189453	0
-23.7	0.0917969	0	-0.00976563	0	0.00193359	0
-23.6	0.0800781	0	-0.00976563	0	0.00177735	0
-23.5	0.0859375	0	0.00292969	0	0.00195313	0
-23.4	0.0800785	0	0.0117189	0	0.00177734	0
-23.3	0.0839842	0	0.0146484	0	0.00177734	0
-23.2	0.0839844	0	0.0244141	0	0.00177734	0
-23.1	0.0839846	0	0.0361328	0	0.00183594	0
-23	0.101563	0	0.0390625	0	0.00183594	0
-22.9	0.101563	0	0.0361328	0	0.00177734	0
-22.8	0.107422	0	0.0507811	0	0.00177734	0
-22.7	0.107422	0	0.0566406	0	0.00177734	0
-22.6	0.107422	0	0.0654297	0	0.00177734	0
-22.5	0.105469	0	0.0732422	0	0.00177734	0
-22.4	0.123046	0	0.0703125	0	0.00173828	0
-22.3	0.113281	0	0.0654298	0	0.00167969	0
-22.2	0.0976563	0	0.0693359	0	0.00167969	0
-22.1	0.0937501	0	0.0664063	0	0.00167969	0
-22	0.0976563	0	0.0595703	0	0.00162109	0
-21.9	0.0859376	0	0.0615236	0	0.00173828	0
-21.8	0.0761722	0	0.0615234	0	0.00162109	0
-21.7	0.0722656	0	0.0722656	0	0.00162109	0
-21.6	0.056641	0	0.0664064	0	0.00158203	0
-21.5	0.0625	0	0.0634766	0	0.00154297	0
-21.4	0.060547	0	0.0703126	0	0.00154297	0
-21.3	0.0507815	0	0.0742188	0	0.00154297	0
-21.2	0.046875	0	0.0712891	0	0.00148438	0
-21.1	0.0468753	0	0.0664064	0	0.00142578	0
-21	0.0390625	0	0.0732422	0	0.00142578	0
-20.9	0.0410158	0	0.078125	0	0.00142578	0
-20.8	0.0468752	0	0.0898439	0	0.00136719	0
-20.7	0.046875	0	0.0849609	0	0.00136719	0
-20.6	0.0332036	0	0.0859376	0	0.00136719	0
-20.5	0.0390625	0	0.0917969	0	0.00148438	0
-20.4	0.0312504	0	0.0839846	0	0.00144531	0
-20.3	0.0390626	0	0.0888672	0	0.00138672	0
-20.2	0.0371094	0	0.0771484	0	0.00138672	0
-20.1	0.021485	0	0.0703127	0	0.00132813	0
-20	0.0273438	0	0.0742188	0	0.00125	0
-19.9	0.0234374	0	0.0664063	0	0.00125	0
-19.8	0.0156252	0	0.0595705	0	0.00126953	0
-19.7	0.0117188	0	0.0654297	0	0.00126953	0
-19.6	0.00195335	0	0.0605469	0	0.00123047	0
-19.5	0.00585938	0	0.0654297	0	0.00128906	0
-19.4	0.00195357	0	0.0556642	0	0.00130859	0
-19.3	0.0039064	0	0.0478517	0	0.00130859	0
-19.2	-0.00390625	0	0.0429688	0	0.00130859	0
-19.1	-0.0039064	0	0.0507813	0	0.00126953	0
-19	-0.00585938	0	0.0478516	0	0.00126953	0
-18.9	-0.0097654	0	0.0458985	0	0.00132813	0
-18.8	-0.00781213	0	0.0410157	0	0.00132813	0
-18.7	-0.0136719	0	0.0498047	0	0.00132813	0
-18.6	-0.0195307	0	0.0419924	0	0.00125	0
-18.5	-0.0234375	0	0.0400391	0	0.00126953	0
-18.4	-0.0175779	0	0.044922	0	0.00121094	0
-18.3	-0.0136717	0	0.0390626	0	0.00121094	0
-18.2	-0.00195313	0	0.0361328	0	0.00121094	0
-18.1	0.00390625	0	0.0302735	0	0.00117187	0
-18	0.00585938	0	0.0273438	0	0.00111328	0
-17.9	0.00781287	0	0.0371095	0	0.00105469	0
-17.8	0.015625	0	0.03125	0	0.00105469	0
-17.7	0.0117188	0	0.0292969	0	0.00117188	0
-17.6	0.0234375	0	0.0263672	0	0.00111328	0
-17.5	0.0175781	0	0.0263672	0	0.00103516	0
-17.4	0.0175781	0	0.0214844	0	0.00103516	0
-17.3	0.013672	0	0.0195313	0	0.00103516	0
-17.2	0.0214844	0	0.0136719	0	0.000976563	0
-17.1	0.0214842	0	0.0117188	0	0.000976563	0
-17	0.0273438	0	0	0	0.0009375	0
-16.9	0.0273438	0	-0.00292958	0	0.0009375	0
-16.8	0.0234374	0	-0.00683586	0	0.000878908	0
-16.7	0.0175781	0	0.00195313	0	0.000839844	0
-16.6	0.011719	0	-0.000976451	0	0.000781254	0
-16.5	0.0117188	0	-0.000976563	0	0.00078125	0
-16.4	0.0234375	0	-0.000976563	0	0.000722656	0
-16.3	0.0234375	0	-0.00292969	0	0.000664065	0
-16.2	0.0175781	0	-0.00585938	0	0.000742188	0
-16.1	0.0175781	0	-0.00585938	0	0.000703125	0
-16	0.0175781	0	-0.0078125	0	0.000664063	0
-15.9	0.0214845	0	-0.0078125	0	0.00078125	0
-15.8	0.0214844	0	-0.0107422	0	0.000722658	0
-15.7	0.0214844	0	-0.0107422	0	0.000800781	0
-15.6	0.0214844	0	-0.0078125	0	0.00074219	0
-15.5	0.0273438	0	-0.0107422	0	0.000742188	0
-15.4	0.0332031	0	-0.0136718	0	0.000683594	0
-15.3	0.0351565	0	-0.0136719	0	0.000722658	0
-15.2	0.0351563	0	-0.0234375	0	0.000722656	0
-15.1	0.0351563	0	-0.0166016	0	0.000683595	0
-15	0.0351563	0	-0.0166016	0	0.000742188	0
-14.9	0.0371094	0	-0.0253907	0	0.000742188	0
-14.8	0.0410155	0	-0.0253906	0	0.00072266	0
-14.7	0.0410156	0	-0.0136719	0	0.000664063	0
-14.6	0.0410155	0	-0.0273438	0	0.000605471	0
-14.5	0.0371094	0	-0.0302734	0	0.000683594	0
-14.4	0.0371094	0	-0.0273438	0	0.000644531	0
-14.3	0.0371094	0	-0.0302734	0	0.00058594	0
-14.2	0.0371094	0	-0.0302734	0	0.000546875	0
-14.1	0.0371092	0	-0.0302734	0	0.000429692	0
-14	0.03125	0	-0.0302734	0	0.00046875	0
-13.9	0.03125	0	-0.0273438	0	0.000351563	0
-13.8	0.0292967	0	-0.0244142	0	0.000429689	0
-13.7	0.0292969	0	-0.0126953	0	0.000390625	0
-13.6	0.0390621	0	-0.0253907	0	0.000332031	0
-13.5	0.0390625	0	-0.0224609	0	0.000273438	0
-13.4	0.046875	0	-0.0302734	0	0.000292969	0
-13.3	0.0390625	0	-0.0302734	0	0.000332034	0
-13.2	0.0390625	0	-0.0419922	0	0.000332031	0
-13.1	0.0332029	0	-0.0390626	0	0.000273438	0
-13	0.0332031	0	-0.0390625	0	0.000292969	0
-12.9	0.0332029	0	-0.0390625	0	0.000292969	0
-12.8	0.0195315	0	-0.0390625	0	0.000234376	0
-12.7	0.0234375	0	-0.0371094	0	0.000234375	0
-12.6	0.0117188	0	-0.0371094	0	0.000234373	0
-12.5	0.0117188	0	-0.0371094	0	0.000234375	0
-12.4	0.0117188	0	-0.0351563	0	0.000117188	0
-12.3	0.0175779	0	-0.0322267	0	0.000156251	0
-12.2	0.00585938	0	-0.0292969	0	0.00015625	0
-12.1	0.00585915	0	-0.0292969	0	5.85975e-05	0
-12	-0.00390625	0	-0.0273438	0	1.95313e-05	0
-11.9	0.0097654	0	-0.0244141	0	7.8125e-05	0
-11.8	0.00976563	0	-0.0224609	0	1.95335e-05	0
-11.7	0.0078125	0	-0.0214844	0	5.85938e-05	0
-11.6	0.0078125	0	-0.0214844	0	-3.90588e-05	0
-11.5	-0.00390625	0	-0.0175781	0	7.8125e-05	0
-11.4	0.0019529	0	-0.0146485	0	7.8125e-05	0
-11.3	0.00195313	0	-0.0126953	0	0.000156249	0
-11.2	-0.00585938	0	-0.00683594	0	0.000117188	0
-11.1	-0.00781243	0	-0.00488289	0	0.000117186	0
-11	-0.0195313	0	-0.00195313	0	0.000136719	0
-10.9	-0.019531	0	-0.0078125	0	0.000214844	0
-10.8	-0.0136721	0	-0.0078125	0	0.000117191	0
-10.7	-0.0136719	0	-0.00488281	0	0.000117188	0
-10.6	-0.00781272	0	-0.00488292	0	0.000136722	0
-10.5	-0.0117188	0	0.0078125	0	9.76563e-05	0
-10.4	-0.0117188	0	0	0	0.000175781	0
-10.3	-0.0117188	0	0.00195313	0	5.85982e-05	0
-10.2	-0.0175781	0	0.00488281	0	0.000175781	0
-10.1	-0.0175781	0	0.00488281	0	0.000136718	0
-10	-0.0175781	0	0.0078125	0	1.95313e-05	0
-9.9	-0.019531	0	0.0126952	0	9.76563e-05	0
-9.8	-0.0253908	0	0.000976563	0	1.95342e-05	0
-9.7	-0.0195313	0	0.00390625	0	7.8125e-05	0
-9.6	-0.0195313	0	0.00390625	0	1.95335e-05	0
-9.5	-0.0234375	0	0.00878906	0	7.8125e-05	0
-9.4	-0.0234375	0	0.00878906	0	0	0
-9.3	-0.0234375	0	0.0107422	0	-5.85938e-05	0
-9.2	-0.0234375	0	0.0107422	0	-7.8125e-05	0
-9.1	-0.035156	0	0.0107422	0	-7.81265e-05	0
-9	-0.0234375	0	0.0166016	0	-0.000175781	0
-8.9	-0.0234375	0	0.0166016	0	-0.000175781	0
-8.8	-0.0234374	0	0.0195313	0	-0.000156246	0
-8.7	-0.0195313	0	0.0195313	0	-0.000214844	0
-8.6	-0.0312497	0	0.0136719	0	-0.00013672	0
-8.5	-0.0214844	0	0.0166016	0	-0.000234375	0
-8.4	-0.0332029	0	0.0166016	0	-0.000214844	0
-8.3	-0.0273438	0	0.0166016	0	-0.000136719	0
-8.2	-0.0195313	0	0.0205078	0	-0.000136719	0
-8.1	-0.0195313	0	0.0205078	0	-0.000253902	0
-8	-0.0214844	0	0.0136719	0	-0.000136719	0
-7.9	-0.0156254	0	0.0166016	0	-0.000214844	0
-7.8	-0.0214839	0	0.0166016	0	-0.000214844	0
-7.7	-0.0117188	0	0.0214844	0	-0.000195313	0
-7.6	-0.0234375	0	0.0214844	0	-0.000253904	0
-7.5	-0.0234375	0	0.0263672	0	-0.000136719	0
-7.4	-0.0175783	0	0.017578	0	-0.000214844	0
-7.3	-0.0175781	0	0.0175781	0	-0.000273438	0
-7.2	-0.0175781	0	0.0136719	0	-0.000332031	0
-7.1	-0.017578	0	0.0166016	0	-0.000253905	0
-7	-0.00976563	0	0.0185547	0	-0.000234375	0
-6.9	-0.0097654	0	0.0244141	0	-0.000234375	0
-6.8	-0.00390647	0	0.0214844	0	-0.000332028	0
-6.7	-0.0117188	0	0.0244141	0	-0.000253906	0
-6.6	-0.0058596	0	0.0273436	0	-0.000234373	0
-6.5	-0.0175781	0	0.0302734	0	-0.000292969	0
-6.4	-0.013672	0	0.0224609	0	-0.000332031	0
-6.3	-0.0019529	0	0.0341797	0	-0.000273437	0
-6.2	-0.00390625	0	0.0244141	0	-0.000371094	0
-6.1	-0.015625	0	0.0263672	0	-0.00033203	0
-6	-0.015625	0	0.0263672	0	-0.000273438	0
-5.9	-0.00390625	0	0.0292969	0	-0.000332031	0
-5.8	-0.00390603	0	0.0214844	0	-0.000371094	0
-5.7	0.0078125	0	0.0244141	0	-0.000292969	0
-5.6	0.0078125	0	0.0273438	0	-0.00035156	0
-5.5	0.0078125	0	0.0273438	0	-0.000273438	0
-5.4	0.0117186	0	0.0292969	0	-0.000390625	0
-5.3	0.011719	0	0.0273438	0	-0.000312499	0
-5.2	0.0175781	0	0.0292969	0	-0.0003125	0
-5.1	0.0175781	0	0.0292969	0	-0.000292968	0
-5	0.0234375	0	0.0302734	0	-0.000371094	0
-4.9	0.0234373	0	0.0351563	0	-0.000429688	0
-4.8	0.0117192	0	0.0341798	0	-0.000312499	0
-4.7	0	0	0.0419922	0	-0.0003125	0
-4.6	0	0	0.0400391	0	-0.000351561	0
-4.5	0	0	0.0429688	0	-0.000351563	0
-4.4	-0.0078125	0	0.0429688	0	-0.000351563	0
-4.3	-0.0078125	0	0.0449219	0	-0.000390621	0
-4.2	-0.0078125	0	0.0449219	0	-0.000390625	0
-4.1	-0.00195335	0	0.0507813	0	-0.000214847	0
-4	-0.00195313	0	0.0429688	0	-0.0003125	0
-3.9	-0.00781272	0	0.0458983	0	-0.000234375	0
-3.8	-0.00781272	0	0.0527344	0	-0.000117188	0
-3.7	-0.0136719	0	0.0644531	0	-0.000175781	0
-3.6	-0.00781295	0	0.0654297	0	-5.85938e-05	0
-3.5	-0.0136719	0	0.0654297	0	-9.76563e-05	0
-3.4	-0.00781265	0	0.0683595	0	-7.8125e-05	0
-3.3	-0.00390588	0	0.053711	0	-0.000136717	0
-3.2	-0.00195313	0	0.0478516	0	-0.000175781	0
-3.1	0.00195327	0	0.0390625	0	-0.00011719	0
-3	0.0117188	0	0.0244141	0	-0.000117188	0
-2.9	0.0195317	0	0.0253907	0	0	0
-2.8	0.0371092	0	0.0292968	0	0	0
-2.7	0.03125	0	0.0273438	0	0	0
-2.6	0.0312503	0	0.0253907	0	-7.81265e-05	0
-2.5	0.0429688	0	0.0214844	0	-3.90625e-05	0
-2.4	0.0507817	0	0.00585949	0	-3.90625e-05	0
-2.3	0.0624995	0	0.00195313	0	-0.000175782	0
-2.2	0.0585938	0	0	0	-0.000566406	0
-2.1	0.0605472	0	-0.00585926	0	-0.000683598	0
-2	0.0859375	0	-0.0078125	0	-0.00109375	0
-1.9	0.0859373	0	-0.026367	0	-0.00103516	0
-1.8	0.0820317	0	-0.0292967	0	-0.00113281	0
-1.7	0.09375	0	-0.0507813	0	-0.00113281	0
-1.6	0.117189	0	-0.047851	0	-0.0011133	0
-1.5	0.142578	0	-0.0693359	0	-0.00142578	0
-1.4	0.140625	0	-0.0761715	0	-0.00138672	0
-1.3	0.175782	0	-0.0634761	0	-0.00132811	0
-1.2	0.0683594	0	-0.00390625	0	0.00015625	0
-1.1	0.0351601	0	-0.0546869	0	-0.00101551	0
-1	-0.103516	0	-0.0976563	0	-0.000644531	0
-0.9	-0.302752	0	-0.216799	0	-0.00236328	0
-0.8	-0.22267	0	-0.102546	0	-0.00181644	0
-0.7	-0.126953	0	-0.101563	0	-0.00177734	0
-0.6	-0.0839854	0	-0.0712896	0	-0.000644534	0
-0.5	-0.0253906	0	-0.0654297	0	-0.000683594	0
-0.4	0.00195336	0	-0.0253905	0	-0.000253906	0
-0.3	0.0175789	0	-0.0332026	0	-0.00138667	0
-0.2	-0.0292969	0	-0.0429688	0	-0.00226563	0
-0.1	-0.0488243	0	-0.0156244	0	-0.0010938	0
0	-0.103516	0	-0.21582	0	0.000273438	0
0.099999	147.191	135	12.4287	59.65	0.0274609	0
0.199997	147.23	135.036	44.3262	59.6501	0.121865	0
0.299999	147.27	135.073	56.5645	59.6502	8.64723	63.37
0.399998	147.309	135.109	59.9053	59.6502	32.9509	63.4162
0.5	147.349	135.145	61.0996	59.6502	47.5214	63.4605
0.599998	147.388	135.181	61.3926	59.6502	54.0027	63.5029
0.699997	147.428	135.218	61.6406	59.6502	57.4379	63.5436
0.799999	147.467	135.254	61.7559	59.6502	59.4702	63.5826
0.899998	147.507	135.29	61.8809	59.6502	60.7617	63.62
1	147.546	135.326	61.875	59.6502	61.5998	63.6558
1.1	147.585	135.362	61.9063	59.6502	62.2027	63.6901
1.2	147.624	135.398	61.9102	59.6502	62.6253	63.7231
1.3	147.664	135.434	61.9141	59.6502	62.9519	63.7546
1.4	147.703	135.47	61.9277	59.6502	63.1985	63.7849
1.5	147.741	135.505	61.9277	59.6502	63.3898	63.8139
1.6	147.78	135.541	61.9238	59.6502	63.5353	63.8417
1.7	147.82	135.577	61.9209	59.6502	63.6567	63.8683
1.8	147.859	135.613	61.9199	59.6502	63.7528	63.8939
1.9	147.897	135.648	61.8975	59.6502	63.8349	63.9184
2	147.936	135.684	61.8916	59.6502	63.9008	63.9419
2.1	147.976	135.72	61.8955	59.6502	63.96	63.9644
2.2	148.014	135.755	61.874	59.6502	64.0094	63.9859
2.3	148.053	135.791	61.8721	59.6502	64.0528	64.0066
2.4	148.091	135.826	61.8506	59.6502	64.0899	64.0264
2.5	148.13	135.862	61.8584	59.6502	64.1221	64.0454
2.6	148.168	135.897	61.8506	59.6502	64.1503	64.0637
2.7	148.208	135.933	61.8486	59.6502	64.1741	64.0811
2.8	148.246	135.968	61.8379	59.6502	64.1996	64.0979
2.9	148.284	136.003	61.8262	59.6502	64.2204	64.1139
3	148.323	136.039	61.8203	59.6502	64.2405	64.1293
3.1	148.361	136.074	61.8271	59.6502	64.2574	64.144
3.2	148.4	136.109	61.8262	59.6502	64.2728	64.1582
3.3	148.438	136.144	61.8164	59.6502	64.2883	64.1717
3.4	148.476	136.179	61.793	59.6502	64.3035	64.1847
3.5	148.514	136.214	61.792	59.6502	64.3179	64.1971
3.6	148.552	136.249	61.7881	59.6502	64.3309	64.2091
3.7	148.59	136.284	61.7793	59.6502	64.3429	64.2205
3.8	148.629	136.319	61.7725	59.6502	64.354	64.2315
3.9	148.667	136.354	61.7695	59.6502	64.3651	64.242
4	148.705	136.389	61.7627	59.6502	64.3753	64.2521
4.1	148.743	136.424	61.7676	59.6502	64.3856	64.2617
4.2	148.781	136.459	61.7549	59.6502	64.3955	64.271
4.3	148.819	136.494	61.7402	59.6502	64.4044	64.2798
4.4	148.858	136.529	61.7432	59.6502	64.4134	64.2884
4.5	148.895	136.563	61.752	59.6502	64.4215	64.2965
4.6	148.933	136.598	61.7412	59.6502	64.4295	64.3043
4.7	148.971	136.633	61.7402	59.6502	64.4369	64.3118
4.8	149.008	136.667	61.7383	59.6502	64.4443	64.319
4.9	149.046	136.702	61.7334	59.6502	64.4511	64.3259
5	149.083	136.736	61.7305	59.6502	64.4581	64.3325
5.1	149.121	136.771	61.7148	59.6502	64.4643	64.3388
5.2	149.158	136.805	61.7188	59.6502	64.4705	64.3449
5.3	149.197	136.84	61.7129	59.6502	64.4763	64.3507
5.4	149.234	136.874	61.7158	59.6502	64.4825	64.3563
5.5	149.271	136.908	61.71	59.6502	64.488	64.3616
5.6	149.309	136.943	61.7158	59.6502	64.4936	64.3667
5.7	149.346	136.977	61.7041	59.6502	64.4989	64.3716
5.8	149.383	137.011	61.7041	59.6502	64.5042	64.3763
5.9	149.42	137.045	61.6953	59.6502	64.5096	64.3809
6	149.458	137.08	61.6953	59.6502	64.5146	64.3852
6.1	149.495	137.114	61.6826	59.6502	64.5192	64.3893
6.2	149.532	137.148	61.6846	59.6502	64.5238	64.3933
6.3	149.57	137.182	61.6768	59.6502	64.5281	64.3971
6.4	149.607	137.216	61.6748	59.6502	64.5324	64.4008
6.5	149.644	137.25	61.6689	59.6502	64.5369	64.4043
6.6	149.681	137.284	61.6631	59.6502	64.5412	64.4076
6.7	149.718	137.318	61.6543	59.6502	64.5454	64.4108
6.8	149.755	137.352	61.6445	59.6502	64.5494	64.4139
6.9	149.791	137.385	61.6416	59.6502	64.5534	64.4169
7	149.828	137.419	61.6436	59.6502	64.5573	64.4197
7.1	149.865	137.453	61.627	59.6502	64.5612	64.4224
7.2	149.902	137.487	61.6182	59.6502	64.565	64.425
7.3	149.938	137.52	61.623	59.6502	64.5686	64.4275
7.4	149.975	137.554	61.6152	59.6502	64.5725	64.4299
7.5	150.012	137.588	61.6035	59.6502	64.5754	64.4322
7.6	150.048	137.621	61.5898	59.6502	64.5782	64.4344
7.7	150.085	137.655	61.582	59.6502	64.5812	64.4365
7.8	150.121	137.688	61.5771	59.6502	64.5842	64.4385
7.9	150.158	137.722	61.5674	59.6502	64.5871	64.4405
8	150.194	137.755	61.5615	59.6502	64.59	64.4423
8.1	150.231	137.789	61.5498	59.6502	64.5929	64.4441
8.2	150.267	137.822	61.5449	59.6502	64.5954	64.4458
8.3	150.303	137.855	61.5303	59.6502	64.5982	64.4474
8.4	150.34	137.889	61.5254	59.6502	64.6009	64.449
8.5	150.376	137.922	61.5137	59.6502	64.6035	64.4505
8.6	150.412	137.955	61.502	59.6502	64.6061	64.452
8.7	150.448	137.988	61.4941	59.6502	64.6088	64.4533
8.8	150.485	138.022	61.4883	59.6502	64.6115	64.4547
8.9	150.521	138.055	61.4805	59.6502	64.614	64.4559
9	150.557	138.088	61.4805	59.6502	64.6166	64.4571
9.1	150.593	138.121	61.4736	59.6502	64.6191	64.4583
9.2	150.629	138.154	61.4658	59.6502	64.6214	64.4594
9.3	150.665	138.187	61.4531	59.6502	64.6237	64.4605
9.4	150.701	138.22	61.4531	59.6502	64.6261	64.4615
9.5	150.737	138.253	61.4287	59.6502	64.6283	64.4625
9.6	150.773	138.286	61.4316	59.6502	64.6307	64.4634
9.7	150.808	138.318	61.4219	59.6502	64.6332	64.4644
9.8	150.844	138.351	61.4121	59.6502	64.6355	64.4652
9.9	150.88	138.384	61.4004	59.6502	64.6377	64.4661
10	150.916	138.417	61.4023	59.6502	64.6403	64.4668
10.1	150.951	138.449	61.3955	59.6502	64.6425	64.4676
10.2	150.987	138.482	61.3867	59.6502	64.6444	64.4683
10.3	151.023	138.515	61.3662	59.6502	64.6466	64.469
10.4	151.058	138.547	61.3672	59.6502	64.6489	64.4697
10.5	151.094	138.58	61.3555	59.6502	64.6511	64.4704
10.6	151.129	138.612	61.3496	59.6502	64.6531	64.471
10.7	151.165	138.645	61.3467	59.6502	64.6552	64.4716
10.8	151.2	138.677	61.332	59.6502	64.6572	64.4721
10.9	151.236	138.71	61.3242	59.6502	64.6593	64.4727
11	151.27	138.742	61.3242	59.6502	64.6614	64.4732
11.1	151.305	138.774	61.3105	59.6502	64.6634	64.4737
11.2	151.341	138.807	61.3135	59.6502	64.6656	64.4742
11.3	151.376	138.839	61.3086	59.6502	64.6675	64.4746
11.4	151.411	138.871	61.3086	59.6502	64.6696	64.4751
11.5	151.447	138.904	61.2939	59.6502	64.6717	64.4755
11.6	151.482	138.936	61.2939	59.6502	64.6736	64.4759
11.7	151.517	138.968	61.2861	59.6502	64.6756	64.4763
11.8	151.552	139	61.2725	59.6502	64.6777	64.4767
11.9	151.587	139.032	61.2725	59.6502	64.6797	64.477
12	151.621	139.064	61.2607	59.6502	64.6819	64.4774
12.1	151.656	139.096	61.25	59.6502	64.6837	64.4777
12.2	151.691	139.128	61.2441	59.6502	64.6857	64.478
12.3	151.726	139.16	61.2305	59.6502	64.6875	64.4783
12.4	151.761	139.192	61.2305	59.6502	64.6896	64.4786
12.5	151.796	139.224	61.2295	59.6502	64.6915	64.4789
12.6	151.831	139.256	61.2158	59.6502	64.6933	64.4791
12.7	151.865	139.287	61.2158	59.6502	64.6954	64.4794
12.8	151.9	139.319	61.2061	59.6502	64.6973	64.4796
12.9	151.934	139.351	61.2012	59.6502	64.6991	64.4799
13	151.969	139.383	61.2012	59.6502	64.7009	64.4801
13.1	152.003	139.414	61.1904	59.6502	64.7026	64.4803
13.2	152.038	139.446	61.1787	59.6502	64.7045	64.4805
13.3	152.073	139.478	61.1787	59.6502	64.706	64.4807
13.4	152.107	139.509	61.1768	59.6502	64.7079	64.4809
13.5	152.142	139.541	61.1631	59.6502	64.7093	64.4811
13.6	152.175	139.572	61.1553	59.6502	64.711	64.4813
13.7	152.21	139.604	61.1406	59.6502	64.7124	64.4814
13.8	152.244	139.635	61.1328	59.6502	64.7141	64.4816
13.9	152.278	139.666	61.127	59.6502	64.7155	64.4817
14	152.313	139.698	61.1133	59.6502	64.7173	64.4819
14.1	152.347	139.729	61.1133	59.6502	64.7187	64.482
14.2	152.38	139.76	61.1074	59.6502	64.7204	64.4822
14.3	152.415	139.792	61.1025	59.6502	64.722	64.4823
14.4	152.449	139.823	61.0859	59.6502	64.7237	64.4824
14.5	152.483	139.854	61.0859	59.6502	64.7254	64.4825
14.6	152.517	139.885	61.0762	59.6502	64.7271	64.4827
14.7	152.55	139.916	61.0596	59.6502	64.7287	64.4828
14.8	152.584	139.947	61.0459	59.6502	64.7303	64.4829
14.9	152.619	139.979	61.0459	59.6502	64.7318	64.483
15	152.653	140.01	61.0352	59.6502	64.7333	64.4831
15.1	152.687	140.041	61.04	59.6502	64.7349	64.4832
15.2	152.721	140.072	61.0273	59.6502	64.7364	64.4832
15.3	152.753	140.102	61.0225	59.6502	64.7379	64.4833
15.4	152.787	140.133	61.0225	59.6502	64.7395	64.4834
15.5	152.821	140.164	61.0078	59.6502	64.7408	64.4835
15.6	152.855	140.195	60.9971	59.6502	64.7423	64.4836
15.7	152.888	140.226	60.9922	59.6502	64.7438	64.4836
15.8	152.922	140.257	60.9756	59.6502	64.7453	64.4837
15.9	152.955	140.287	60.9717	59.6502	64.7467	64.4838
16	152.989	140.318	60.9609	59.6502	64.748	64.4838
16.1	153.023	140.349	60.9609	59.6502	64.7495	64.4839
16.2	153.055	140.379	60.9463	59.6502	64.7509	64.4839
16.3	153.089	140.41	60.9463	59.6502	64.7526	64.484
16.4	153.123	140.441	60.9307	59.6502	64.7538	64.4841
16.5	153.156	140.471	60.9238	59.6502	64.7551	64.4841
16.6	153.189	140.502	60.9072	59.6502	64.7566	64.4842
16.7	153.222	140.532	60.9072	59.6502	64.7583	64.4842
16.8	153.255	140.562	60.8896	59.6502	64.7596	64.4842
16.9	153.289	140.593	60.8896	59.6502	64.7607	64.4843
17	153.321	140.623	60.8818	59.6502	64.7622	64.4843
17.1	153.355	140.654	60.8623	59.6502	64.7636	64.4844
17.2	153.388	140.684	60.8604	59.6502	64.765	64.4844
17.3	153.42	140.714	60.8525	59.6502	64.7662	64.4844
17.4	153.453	140.744	60.8447	59.6502	64.7673	64.4845
17.5	153.487	140.775	60.8271	59.6502	64.7686	64.4845
17.6	153.52	140.805	60.8213	59.6502	64.7699	64.4845
17.7	153.552	140.835	60.8115	59.6502	64.7711	64.4846
17.8	153.585	140.865	60.8027	59.6502	64.7721	64.4846
17.9	153.618	140.895	60.7998	59.6502	64.7732	64.4846
18	153.651	140.925	60.7813	59.6502	64.7742	64.4847
18.1	153.683	140.955	60.7754	59.6502	64.7751	64.4847
18.2	153.716	140.985	60.7617	59.6502	64.7761	64.4847
18.3	153.749	141.015	60.7539	59.6502	64.777	64.4847
18.4	153.781	141.045	60.748	59.6502	64.7777	64.4848
18.5	153.814	141.075	60.7324	59.6502	64.7786	64.4848
18.6	153.847	141.105	60.7217	59.6502	64.7794	64.4848
18.7	153.879	141.135	60.7158	59.6502	64.7804	64.4848
18.8	153.911	141.164	60.7129	59.6502	64.7811	64.4848
18.9	153.944	141.194	60.707	59.6502	64.7818	64.4849
19	153.977	141.224	60.6865	59.6502	64.7828	64.4849
19.1	154.009	141.254	60.6885	59.6502	64.7836	64.4849
19.2	154.041	141.283	60.6777	59.6502	64.7844	64.4849
19.3	154.074	141.313	60.667	59.6502	64.7852	64.4849
19.4	154.106	141.343	60.6631	59.6502	64.7859	64.4849
19.5	154.138	141.372	60.6465	59.6502	64.7867	64.485
19.6	154.171	141.402	60.6387	59.6502	64.7875	64.485
19.7	154.202	141.431	60.6279	59.6502	64.7883	64.485
19.8	154.235	141.461	60.624	59.6502	64.7889	64.485
19.9	154.267	141.49	60.6074	59.6502	64.7897	64.485
20	154.298	141.519	60.5986	59.6502	64.7905	64.485
20.1	154.331	141.549	60.5938	59.6502	64.7913	64.485
20.2	154.362	141.578	60.5879	59.6502	64.792	64.485
20.3	154.395	141.608	60.5811	59.6502	64.7925	64.485
20.4	154.427	141.637	60.5654	59.6502	64.7929	64.4851
20.5	154.458	141.666	60.5518	59.6502	64.7935	64.4851
20.6	154.49	141.695	60.5488	59.6502	64.7942	64.4851
20.7	154.523	141.725	60.5332	59.6502	64.7946	64.4851
20.8	154.554	141.754	60.5283	59.6502	64.7951	64.4851
20.9	154.586	141.783	60.5117	59.6502	64.7956	64.4851
21	154.618	141.812	60.5098	59.6502	64.7963	64.4851
21.1	154.649	141.841	60.5049	59.6502	64.7967	64.4851
21.2	154.681	141.87	60.4883	59.6502	64.7973	64.4851
21.3	154.712	141.899	60.4883	59.6502	64.7978	64.4851
21.4	154.744	141.928	60.4834	59.6502	64.7984	64.4851
21.5	154.776	141.957	60.4717	59.6502	64.7991	64.4851
21.6	154.807	141.986	60.46	59.6502	64.7997	64.4851
21.7	154.839	142.015	60.4434	59.6502	64.8001	64.4852
21.8	154.871	142.044	60.4355	59.6502	64.8005	64.4852
21.9	154.901	142.072	60.4238	59.6502	64.8011	64.4852
22	154.933	142.101	60.4053	59.6502	64.8017	64.4852
22.1	154.964	142.13	60.3994	59.6502	64.802	64.4852
22.2	154.996	142.159	60.3857	59.6502	64.8026	64.4852
22.3	155.026	142.187	60.3809	59.6502	64.8031	64.4852
22.4	155.058	142.216	60.3691	59.6502	64.8032	64.4852
22.5	155.09	142.245	60.3613	59.6502	64.8036	64.4852
22.6	155.12	142.273	60.3574	59.6502	64.8037	64.4852
22.7	155.152	142.302	60.3525	59.6502	64.804	64.4852
22.8	155.182	142.33	60.335	59.6502	64.8045	64.4852
22.9	155.214	142.359	60.3301	59.6502	64.8046	64.4852
23	155.245	142.387	60.3164	59.6502	64.8048	64.4852
23.1	155.276	142.416	60.3115	59.6502	64.8051	64.4852
23.2	155.307	142.444	60.3076	59.6502	64.8053	64.4852
23.3	155.338	142.473	60.29	59.6502	64.8054	64.4852
23.4	155.369	142.501	60.2871	59.6502	64.8057	64.4852
23.5	155.399	142.529	60.2813	59.6502	64.8061	64.4852
23.6	155.431	142.558	60.2764	59.6502	64.8063	64.4852
23.7	155.462	142.586	60.2705	59.6502	64.8065	64.4852
23.8	155.492	142.614	60.2705	59.6502	64.8067	64.4852
23.9	155.523	142.642	60.2666	59.6502	64.8069	64.4852
24	155.554	142.671	60.2617	59.6502	64.8071	64.4852
24.1	155.585	142.699	60.248	59.6502	64.8072	64.4852
24.2	155.615	142.727	60.2461	59.6502	64.8075	64.4852
24.3	155.646	142.755	60.2256	59.6502	64.8076	64.4852
24.4	155.676	142.783	60.2207	59.6502	64.8076	64.4852
24.5	155.707	142.811	60.2139	59.6502	64.8077	64.4852
24.6	155.737	142.839	60.1992	59.6502	64.8077	64.4852
24.7	155.768	142.867	60.1943	59.6502	64.8078	64.4852
24.8	155.798	142.895	60.1914	59.6502	64.8078	64.4853
24.9	155.829	142.923	60.1855	59.6502	64.8078	64.4853
25	155.859	142.951	60.1748	59.6502	64.8079	64.4853
25.1	155.89	142.979	60.1748	59.6502	64.808	64.4853
25.2	155.919	143.006	60.1553	59.6502	64.8079	64.4853
25.3	155.95	143.034	60.1445	59.6502	64.808	64.4853
25.4	155.98	143.062	60.1348	59.6502	64.8081	64.4853
25.5	156.011	143.09	60.127	59.6502	64.8081	64.4853
25.6	156.04	143.117	60.124	59.6502	64.808	64.4853
25.7	156.071	143.145	60.1055	59.6502	64.808	64.4853
25.8	156.102	143.173	60.0967	59.6502	64.8081	64.4853
25.9	156.131	143.2	60.0889	59.6502	64.8081	64.4853
26	156.161	143.228	60.0762	59.6502	64.808	64.4853
26.1	156.192	143.256	60.0586	59.6502	64.808	64.4853
26.2	156.221	143.283	60.0537	59.6502	64.8081	64.4853
26.3	156.252	143.311	60.0459	59.6502	64.8083	64.4853
26.4	156.281	143.338	60.0381	59.6502	64.8083	64.4853
26.5	156.311	143.365	60.0303	59.6502	64.8083	64.4853
26.6	156.341	143.393	60.0137	59.6502	64.8085	64.4853
26.7	156.371	143.42	60.0137	59.6502	64.8086	64.4853
26.8	156.401	143.448	60.0068	59.6502	64.8086	64.4853
26.9	156.431	143.475	59.9854	59.6502	64.8088	64.4853
27	156.46	143.502	59.9834	59.6502	64.8088	64.4853
27.1	156.49	143.529	59.9668	59.6502	64.8088	64.4853
27.2	156.52	143.557	59.96	59.6502	64.8087	64.4853
27.3	156.55	143.584	59.957	59.6502	64.8087	64.4853
27.4	156.579	143.611	59.9355	59.6502	64.8089	64.4853
27.5	156.609	143.638	59.9277	59.6502	64.8088	64.4853
27.6	156.638	143.665	59.9219	59.6502	64.8088	64.4853
27.7	156.667	143.692	59.9199	59.6502	64.8088	64.4853
27.8	156.698	143.72	59.9102	59.6502	64.809	64.4853
27.9	156.727	143.747	59.9053	59.6502	64.8089	64.4853
28	156.757	143.774	59.8896	59.6502	64.8089	64.4853
28.1	156.786	143.801	59.8896	59.6502	64.8088	64.4853
28.2	156.815	143.827	59.8711	59.6502	64.8089	64.4853
28.3	156.844	143.854	59.8662	59.6502	64.8088	64.4853
28.4	156.873	143.881	59.8604	59.6502	64.8088	64.4853
28.5	156.903	143.908	59.8506	59.6502	64.8087	64.4853
28.6	156.932	143.935	59.8311	59.6502	64.8087	64.4853
28.7	156.962	143.962	59.8232	59.6502	64.8086	64.4853
28.8	156.991	143.989	59.8086	59.6502	64.8086	64.4853
28.9	157.02	144.015	59.8008	59.6502	64.8084	64.4853
29	157.049	144.042	59.7861	59.6502	64.8082	64.4853
29.1	157.078	144.069	59.7676	59.6502	64.8081	64.4853
29.2	157.107	144.095	59.7627	59.6502	64.8081	64.4853
29.3	157.136	144.122	59.7471	59.6502	64.8077	64.4853
29.4	157.166	144.149	59.7451	59.6502	64.8075	64.4853
29.5	157.194	144.175	59.7422	59.6502	64.8072	64.4853
29.6	157.223	144.202	59.7256	59.6502	64.8069	64.4853
29.7	157.252	144.228	59.7207	59.6502	64.8064	64.4853
29.8	157.281	144.255	59.707	59.6502	64.806	64.4853
29.9	157.31	144.281	59.7031	59.6502	64.8055	64.4853
30	157.339	144.308	59.6885	59.6502	64.8051	64.4853
30.1	157.367	144.334	59.6826	59.6502	64.8045	64.4853
30.2	157.396	144.36	59.6729	59.6502	64.8039	64.4853
30.3	157.425	144.387	59.6543	59.6502	64.8031	64.4853
30.4	157.453	144.413	59.6543	59.6502	64.8023	64.4853
30.5	157.482	144.439	59.6396	59.6502	64.8016	64.4853
30.6	157.511	144.466	59.6338	59.6502	64.8009	64.4853
30.7	157.54	144.492	59.626	59.6502	64.8002	64.4853
30.8	157.568	144.518	59.624	59.6502	64.7993	64.4853
30.9	157.596	144.544	59.6094	59.6502	64.7985	64.4853
31	157.625	144.57	59.5977	59.6502	64.7977	64.4853
31.1	157.653	144.596	59.584	59.6502	64.797	64.4853
31.2	157.682	144.623	59.5752	59.6502	64.7964	64.4853
31.3	157.711	144.649	59.5654	59.6502	64.7957	64.4853
31.4	157.739	144.675	59.5605	59.6502	64.7949	64.4853
31.5	157.768	144.701	59.5449	59.6502	64.7942	64.4853
31.6	157.796	144.727	59.5391	59.6502	64.7936	64.4853
31.7	157.824	144.753	59.5293	59.6502	64.793	64.4853
31.8	157.853	144.779	59.5088	59.6502	64.7925	64.4853
31.9	157.88	144.804	59.5059	59.6502	64.7919	64.4853
32	157.908	144.83	59.4922	59.6502	64.7916	64.4853
32.1	157.936	144.856	59.4795	59.6502	64.7911	64.4853
32.2	157.965	144.882	59.4648	59.6502	64.7906	64.4853
32.3	157.993	144.908	59.457	59.6502	64.7902	64.4853
32.4	158.022	144.934	59.4492	59.6502	64.79	64.4853
32.5	158.049	144.959	59.4375	59.6502	64.7896	64.4853
32.6	158.077	144.985	59.4336	59.6502	64.7894	64.4853
32.7	158.105	145.011	59.4209	59.6502	64.7891	64.4853
32.8	158.133	145.036	59.4063	59.6502	64.7888	64.4853
32.9	158.161	145.062	59.3955	59.6502	64.7884	64.4853
33	158.189	145.088	59.3789	59.6502	64.788	64.4853
33.1	158.217	145.113	59.3672	59.6502	64.7877	64.4853
33.2	158.245	145.139	59.3623	59.6502	64.7874	64.4853
33.3	158.272	145.164	59.3574	59.6502	64.787	64.4853
33.4	158.301	145.19	59.3408	59.6502	64.7867	64.4853
33.5	158.328	145.215	59.332	59.6502	64.7863	64.4853
33.6	158.356	145.241	59.3242	59.6502	64.786	64.4853
33.7	158.384	145.266	59.3135	59.6502	64.7858	64.4853
33.8	158.411	145.291	59.2939	59.6502	64.7854	64.4853
33.9	158.439	145.317	59.2891	59.6502	64.7851	64.4853
34	158.466	145.342	59.2832	59.6502	64.7847	64.4853
34.1	158.494	145.367	59.2686	59.6502	64.7843	64.4853
34.2	158.522	145.393	59.2559	59.6502	64.7841	64.4853
34.3	158.549	145.418	59.248	59.6502	64.7837	64.4853
34.4	158.577	145.443	59.2412	59.6502	64.7834	64.4853
34.5	158.604	145.468	59.2275	59.6502	64.7831	64.4853
34.6	158.631	145.493	59.2227	59.6502	64.7829	64.4853
34.7	158.658	145.518	59.2168	59.6502	64.7825	64.4853
34.8	158.687	145.544	59.2119	59.6502	64.7821	64.4853
34.9	158.714	145.569	59.1904	59.6502	64.7818	64.4853
35	158.741	145.594	59.1904	59.6502	64.7815	64.4853
35.1	158.768	145.619	59.1797	59.6502	64.7812	64.4853
35.2	158.796	145.644	59.1748	59.6502	64.7808	64.4853
35.3	158.823	145.669	59.166	59.6502	64.7805	64.4853
35.4	158.85	145.694	59.1582	59.6502	64.7802	64.4853
35.5	158.877	145.719	59.1602	59.6502	64.7798	64.4853
35.6	158.904	145.743	59.1484	59.6502	64.7796	64.4853
35.7	158.931	145.768	59.1396	59.6502	64.7792	64.4853
35.8	158.958	145.793	59.125	59.6502	64.7789	64.4853
35.9	158.985	145.818	59.123	59.6502	64.7787	64.4853
36	159.013	145.843	59.1152	59.6502	64.7783	64.4853
36.1	159.04	145.868	59.1133	59.6502	64.778	64.4853
36.2	159.066	145.892	59.0918	59.6502	64.7777	64.4853
36.3	159.093	145.917	59.0811	59.6502	64.7775	64.4853
36.4	159.121	145.942	59.0791	59.6502	64.7773	64.4853
36.5	159.147	145.966	59.0566	59.6502	64.7771	64.4853
36.6	159.174	145.991	59.0518	59.6502	64.7769	64.4853
36.7	159.201	146.016	59.042	59.6502	64.7766	64.4853
36.8	159.227	146.04	59.0371	59.6502	64.7764	64.4853
36.9	159.255	146.065	59.0293	59.6502	64.7762	64.4853
37	159.281	146.089	59.0176	59.6502	64.776	64.4853
37.1	159.308	146.114	59.0098	59.6502	64.7757	64.4853
37.2	159.334	146.138	59.0049	59.6502	64.7754	64.4853
37.3	159.362	146.163	58.9951	59.6502	64.7752	64.4853
37.4	159.388	146.187	58.9902	59.6502	64.775	64.4853
37.5	159.414	146.211	58.9873	59.6502	64.7746	64.4853
37.6	159.441	146.236	58.9893	59.6502	64.7744	64.4853
37.7	159.467	146.26	58.9717	59.6502	64.7742	64.4853
37.8	159.493	146.284	58.9658	59.6502	64.7739	64.4853
37.9	159.521	146.309	58.9609	59.6502	64.7738	64.4853
38	159.547	146.333	58.9609	59.6502	64.7735	64.4853
38.1	159.573	146.357	58.958	59.6502	64.7733	64.4853
38.2	159.599	146.381	58.9453	59.6502	64.773	64.4853
38.3	159.626	146.406	58.9404	59.6502	64.7728	64.4853
38.4	159.653	146.43	58.9258	59.6502	64.7726	64.4853
38.5	159.679	146.454	58.916	59.6502	64.7724	64.4853
38.6	159.705	146.478	58.9141	59.6502	64.7723	64.4853
38.7	159.731	146.502	58.9082	59.6502	64.7721	64.4853
38.8	159.757	146.526	58.9004	59.6502	64.772	64.4853
38.9	159.783	146.55	58.8965	59.6502	64.7718	64.4853
39	159.81	146.574	58.8848	59.6502	64.7716	64.4853
39.1	159.836	146.598	58.8799	59.6502	64.7715	64.4853
39.2	159.862	146.622	58.8652	59.6502	64.7713	64.4853
39.3	159.888	146.646	58.8564	59.6502	64.771	64.4853
39.4	159.914	146.67	58.8525	59.6502	64.7709	64.4853
39.5	159.94	146.694	58.8496	59.6502	64.7707	64.4853
39.6	159.967	146.718	58.833	59.6502	64.7704	64.4853
39.7	159.993	146.742	58.8301	59.6502	64.7703	64.4853
39.8	160.018	146.765	58.8281	59.6502	64.77	64.4853
39.9	160.044	146.789	58.8174	59.6502	64.7698	64.4853
40	160.07	146.813	58.8174	59.6502	64.7697	64.4853
40.1	160.096	146.837	58.7959	59.6502	64.7695	64.4853
40.2	160.121	146.86	58.8027	59.6502	64.7694	64.4853
40.3	160.148	146.884	58.791	59.6502	64.7692	64.4853
40.4	160.174	146.908	58.791	59.6502	64.769	64.4853
40.5	160.199	146.931	58.7764	59.6502	64.7689	64.4853
40.6	160.225	146.955	58.7734	59.6502	64.7687	64.4853
40.7	160.25	146.978	58.7598	59.6502	64.7685	64.4853
40.8	160.276	147.002	58.7598	59.6502	64.7684	64.4853
40.9	160.301	147.025	58.7451	59.6502	64.7682	64.4853
41	160.328	147.049	58.7422	59.6502	64.7679	64.4853
41.1	160.353	147.072	58.7305	59.6502	64.7678	64.4853
41.2	160.379	147.096	58.7178	59.6502	64.7675	64.4853
41.3	160.404	147.119	58.7148	59.6502	64.7673	64.4853
41.4	160.43	147.143	58.71	59.6502	64.7671	64.4853
41.5	160.455	147.166	58.7041	59.6502	64.7668	64.4853
41.6	160.48	147.189	58.7041	59.6502	64.7666	64.4853
41.7	160.506	147.213	58.6924	59.6502	64.7666	64.4853
41.8	160.531	147.236	58.6895	59.6502	64.7664	64.4853
41.9	160.556	147.259	58.6855	59.6502	64.7662	64.4853
42	160.583	147.283	58.6777	59.6502	64.7662	64.4853
42.1	160.608	147.306	58.6748	59.6502	64.766	64.4853
42.2	160.633	147.329	58.6563	59.6502	64.7658	64.4853
42.3	160.658	147.352	58.6533	59.6502	64.7655	64.4853
42.4	160.683	147.375	58.6514	59.6502	64.7653	64.4853
42.5	160.708	147.398	58.6514	59.6502	64.7652	64.4853
42.6	160.734	147.422	58.6436	59.6502	64.765	64.4853
42.7	160.759	147.445	58.6436	59.6502	64.7649	64.4853
42.8	160.784	147.468	58.6318	59.6502	64.7646	64.4853
42.9	160.809	147.491	58.6299	59.6502	64.7645	64.4853
43	160.835	147.514	58.6074	59.6502	64.7644	64.4853
43.1	160.86	147.537	58.6055	59.6502	64.7642	64.4853
43.2	160.885	147.56	58.5947	59.6502	64.764	64.4853
43.3	160.91	147.583	58.5918	59.6502	64.7638	64.4853
43.4	160.934	147.605	58.5918	59.6502	64.7636	64.4853
43.5	160.959	147.628	58.5801	59.6502	64.7634	64.4853
43.6	160.984	147.651	58.5693	59.6502	64.7632	64.4853
43.7	161.009	147.674	58.5654	59.6502	64.7631	64.4853
43.8	161.034	147.697	58.5654	59.6502	64.763	64.4853
43.9	161.059	147.72	58.5508	59.6502	64.7628	64.4853
44	161.083	147.742	58.543	59.6502	64.7625	64.4853
44.1	161.108	147.765	58.543	59.6502	64.7623	64.4853
44.2	161.133	147.788	58.5322	59.6502	64.7621	64.4853
44.3	161.157	147.81	58.5313	59.6502	64.7619	64.4853
44.4	161.182	147.833	58.5186	59.6502	64.7616	64.4853
44.5	161.207	147.856	58.5117	59.6502	64.7615	64.4853
44.6	161.231	147.878	58.5039	59.6502	64.7612	64.4853
44.7	161.256	147.901	58.4941	59.6502	64.761	64.4853
44.8	161.282	147.924	58.4775	59.6502	64.7609	64.4853
44.9	161.306	147.946	58.4746	59.6502	64.7607	64.4853
45	161.331	147.969	58.4561	59.6502	64.7605	64.4853
45.1	161.355	147.991	58.4482	59.6502	64.7602	64.4853
45.2	161.38	148.014	58.4424	59.6502	64.7601	64.4853
45.3	161.404	148.036	58.4424	59.6502	64.76	64.4853
45.4	161.428	148.058	58.4258	59.6502	64.7598	64.4853
45.5	161.453	148.081	58.4229	59.6502	64.7595	64.4853
45.6	161.477	148.103	58.415	59.6502	64.7593	64.4853
45.7	161.501	148.125	58.4043	59.6502	64.7592	64.4853
45.8	161.526	148.148	58.3906	59.6502	64.7589	64.4853
45.9	161.55	148.17	58.3857	59.6502	64.7587	64.4853
46	161.574	148.192	58.3779	59.6502	64.7586	64.4853
46.1	161.599	148.215	58.373	59.6502	64.7583	64.4853
46.2	161.623	148.237	58.3662	59.6502	64.7581	64.4853
46.3	161.647	148.259	58.3584	59.6502	64.758	64.4853
46.4	161.671	148.281	58.3584	59.6502	64.7578	64.4853
46.5	161.695	148.303	58.3477	59.6502	64.7575	64.4853
46.6	161.72	148.326	58.3428	59.6502	64.7573	64.4853
46.7	161.744	148.348	58.3184	59.6502	64.7571	64.4853
46.8	161.768	148.37	58.3135	59.6502	64.7569	64.4853
46.9	161.792	148.392	58.3066	59.6502	64.7568	64.4853
47	161.816	148.414	58.3086	59.6502	64.7565	64.4853
47.1	161.84	148.436	58.334	59.6502	64.7564	64.4853
47.2	161.864	148.458	58.3369	59.6502	64.7561	64.4853
47.3	161.888	148.48	58.3389	59.6502	64.7559	64.4853
47.4	161.912	148.502	58.332	59.6502	64.7558	64.4853
47.5	161.936	148.524	58.3623	59.6502	64.7556	64.4853
47.6	161.96	148.546	58.3643	59.6502	64.7555	64.4853
47.7	161.983	148.567	58.3613	59.6502	64.7552	64.4853
47.8	162.007	148.589	58.3691	59.6502	64.7551	64.4853
47.9	162.031	148.611	58.3516	59.6502	64.7548	64.4853
48	162.055	148.633	58.3447	59.6502	64.7547	64.4853
48.1	162.079	148.655	58.3438	59.6502	64.7544	64.4853
48.2	162.101	148.676	58.3301	59.6502	64.7543	64.4853
48.3	162.125	148.698	58.3252	59.6502	64.7541	64.4853
48.4	162.149	148.72	58.3223	59.6502	64.7539	64.4853
48.5	162.173	148.742	58.3145	59.6502	64.7536	64.4853
48.6	162.196	148.763	58.3096	59.6502	64.7535	64.4853
48.7	162.22	148.785	58.3096	59.6502	64.7533	64.4853
48.8	162.243	148.806	58.3057	59.6502	64.7531	64.4853
48.9	162.267	148.828	58.3018	59.6502	64.753	64.4853
49	162.291	148.85	58.2852	59.6502	64.7528	64.4853
49.1	162.314	148.871	58.2852	59.6502	64.7526	64.4853
49.2	162.338	148.893	58.2803	59.6502	64.7524	64.4853
49.3	162.361	148.914	58.2754	59.6502	64.7523	64.4853
49.4	162.385	148.936	58.2734	59.6502	64.7521	64.4853
49.5	162.408	148.957	58.2725	59.6502	64.752	64.4853
49.6	162.432	148.979	58.2676	59.6502	64.7518	64.4853
49.7	162.455	149	58.2549	59.6502	64.7517	64.4853
49.8	162.478	149.021	58.2529	59.6502	64.7515	64.4853
49.9	162.502	149.043	58.25	59.6502	64.7513	64.4853
50	162.524	149.064	58.248	59.6502	64.7512	64.4853
50.1	162.547	149.085	58.2305	59.6502	64.751	64.4853
50.2	162.571	149.107	58.2305	59.6502	64.7507	64.4853
50.3	162.594	149.128	58.2227	59.6502	64.7506	64.4853
50.4	162.617	149.149	58.2197	59.6502	64.7505	64.4853
50.5	162.64	149.17	58.2227	59.6502	64.7503	64.4853
50.6	162.664	149.192	58.2197	59.6502	64.7501	64.4853
50.7	162.687	149.213	58.2178	59.6502	64.7499	64.4853
50.8	162.71	149.234	58.2207	59.6502	64.7499	64.4853
50.9	162.733	149.255	58.208	59.6502	64.7497	64.4853
51	162.756	149.276	58.208	59.6502	64.7496	64.4853
51.1	162.779	149.297	58.2061	59.6502	64.7494	64.4853
51.2	162.801	149.318	58.2051	59.6502	64.7493	64.4853
51.3	162.824	149.339	58.1885	59.6502	64.7493	64.4853
51.4	162.847	149.36	58.1943	59.6502	64.7491	64.4853
51.5	162.87	149.381	58.1914	59.6502	64.749	64.4853
51.6	162.893	149.402	58.1943	59.6502	64.7489	64.4853
51.7	162.916	149.423	58.1826	59.6502	64.7488	64.4853
51.8	162.939	149.444	58.1689	59.6502	64.7487	64.4853
51.9	162.962	149.465	58.1689	59.6502	64.7487	64.4853
52	162.985	149.486	58.1699	59.6502	64.7485	64.4853
52.1	163.007	149.507	58.1699	59.6502	64.7485	64.4853
52.2	163.03	149.528	58.1699	59.6502	64.7485	64.4853
52.3	163.053	149.549	58.1602	59.6502	64.7485	64.4853
52.4	163.075	149.569	58.1621	59.6502	64.7484	64.4853
52.5	163.098	149.59	58.1582	59.6502	64.7484	64.4853
52.6	163.121	149.611	58.1504	59.6502	64.7483	64.4853
52.7	163.144	149.632	58.1553	59.6502	64.7483	64.4853
52.8	163.166	149.652	58.1523	59.6502	64.7482	64.4853
52.9	163.188	149.673	58.1523	59.6502	64.7482	64.4853
53	163.211	149.694	58.1436	59.6502	64.7481	64.4853
53.1	163.233	149.714	58.1406	59.6502	64.748	64.4853
53.2	163.256	149.735	58.1328	59.6502	64.748	64.4853
53.3	163.279	149.756	58.1309	59.6502	64.7479	64.4853
53.4	163.301	149.776	58.1338	59.6502	64.7479	64.4853
53.5	163.324	149.797	58.1211	59.6502	64.7478	64.4853
53.6	163.345	149.817	58.1211	59.6502	64.7479	64.4853
53.7	163.368	149.838	58.1191	59.6502	64.7477	64.4853
53.8	163.39	149.858	58.1113	59.6502	64.7477	64.4853
53.9	163.413	149.879	58.1133	59.6502	64.7477	64.4853
54	163.435	149.899	58.1211	59.6502	64.7476	64.4853
54.1	163.458	149.92	58.1113	59.6502	64.7475	64.4853
54.2	163.48	149.94	58.1113	59.6502	64.7476	64.4853
54.3	163.501	149.96	58.1143	59.6502	64.7475	64.4853
54.4	163.524	149.981	58.1045	59.6502	64.7475	64.4853
54.5	163.546	150.001	58.1045	59.6502	64.7474	64.4853
54.6	163.568	150.021	58.0967	59.6502	64.7474	64.4853
54.7	163.591	150.042	58.0947	59.6502	64.7474	64.4853
54.8	163.613	150.062	58.0996	59.6502	64.7473	64.4853
54.9	163.634	150.082	58.0977	59.6502	64.7474	64.4853
55	163.657	150.103	58.1045	59.6502	64.7474	64.4853
55.1	163.679	150.123	58.0908	59.6502	64.7474	64.4853
55.2	163.701	150.143	58.0908	59.6502	64.7473	64.4853
55.3	163.723	150.163	58.0928	59.6502	64.7473	64.4853
55.4	163.745	150.183	58.0947	59.6502	64.7473	64.4853
55.5	163.766	150.203	58.083	59.6502	64.7472	64.4853
55.6	163.788	150.223	58.0781	59.6502	64.7472	64.4853
55.7	163.811	150.244	58.0801	59.6502	64.7472	64.4853
55.8	163.833	150.264	58.0732	59.6502	64.7471	64.4853
55.9	163.855	150.284	58.0732	59.6502	64.7471	64.4853
56	163.876	150.304	58.0703	59.6502	64.7471	64.4853
56.1	163.898	150.324	58.0625	59.6502	64.747	64.4853
56.2	163.92	150.344	58.0547	59.6502	64.7469	64.4853
56.3	163.942	150.364	58.0557	59.6502	64.747	64.4853
56.4	163.963	150.383	58.0557	59.6502	64.747	64.4853
56.5	163.984	150.403	58.0381	59.6502	64.7469	64.4853
56.6	164.006	150.423	58.041	59.6502	64.7468	64.4853
56.7	164.028	150.443	58.0381	59.6502	64.7468	64.4853
56.8	164.05	150.463	58.041	59.6502	64.7466	64.4853
56.9	164.072	150.483	58.0361	59.6502	64.7466	64.4853
57	164.093	150.503	58.0322	59.6502	64.7465	64.4853
57.1	164.114	150.522	58.0244	59.6502	64.7465	64.4853
57.2	164.136	150.542	58.0254	59.6502	64.7464	64.4853
57.3	164.158	150.562	58.0273	59.6502	64.7461	64.4853
57.4	164.18	150.582	58.0059	59.6502	64.746	64.4853
57.5	164.2	150.601	58.0029	59.6502	64.7459	64.4853
57.6	164.222	150.621	58.0078	59.6502	64.7459	64.4853
57.7	164.244	150.641	58.0146	59.6502	64.7458	64.4853
57.8	164.265	150.66	58.0166	59.6502	64.7457	64.4853
57.9	164.286	150.68	58.0195	59.6502	64.7456	64.4853
58	164.307	150.699	58.0117	59.6502	64.7456	64.4853
58.1	164.329	150.719	58.0195	59.6502	64.7455	64.4853
58.2	164.351	150.739	58.0146	59.6502	64.7454	64.4853
58.3	164.371	150.758	58.0059	59.6502	64.7453	64.4853
58.4	164.393	150.778	58.0059	59.6502	64.7454	64.4853
58.5	164.414	150.797	58.0117	59.6502	64.7454	64.4853
58.6	164.436	150.817	58.0186	59.6502	64.7454	64.4853
58.7	164.456	150.836	58.0264	59.6502	64.745	64.4853
58.8	164.477	150.855	58.0186	59.6502	64.7448	64.4853
58.9	164.499	150.875	58.0088	59.6502	64.7442	64.4853
59	164.52	150.894	58.0059	59.6502	64.7439	64.4853
59.1	164.542	150.914	57.9814	59.6502	64.7437	64.4853
59.2	164.562	150.933	57.9619	59.6502	64.7431	64.4853
59.3	164.583	150.952	57.957	59.6502	64.7427	64.4853
59.4	164.605	150.972	57.9277	59.6502	64.7418	64.4853
59.5	164.625	150.991	57.916	59.6502	64.7415	64.4853
59.6	164.646	151.01	57.9277	59.6502	64.741	64.4853
59.7	164.667	151.029	57.9609	59.6502	64.7405	64.4853
59.8	164.689	151.049	57.8721	59.6502	64.7403	64.4853
59.9	164.709	151.068	57.9795	59.6502	64.7417	64.4853
60	164.73	151.087	56.668	59.6502	64.7341	64.4853
60.1	17.5395	16.0869	10.6631	0.000211098	64.7324	64.4853
60.2	17.5394	16.0868	-1.16604	0.000211096	64.6389	64.4853
60.3	17.5394	16.0868	-1.46095	0.000211094	44.2057	64.4853
60.4	17.5393	16.0867	-1.82519	0.000211091	10.6279	1.11529
60.5	17.5393	16.0867	-1.58692	0.000211089	4.17045	1.11521
60.6	17.5392	16.0866	-1.60644	0.000211087	2.62133	1.11514
60.7	17.5392	16.0866	-1.62109	0.000211085	1.98893	1.11507
60.8	17.5391	16.0865	-1.66211	0.000211082	1.70797	1.115
60.9	17.5391	16.0865	-1.66309	0.00021108	1.57322	1.11492
61	17.539	16.0864	-1.66699	0.000211078	1.50598	1.11485
61.1	17.539	16.0864	-1.66504	0.000211076	1.47117	1.11478
61.2	17.5389	16.0863	-1.66309	0.000211073	1.45422	1.11471
61.3	17.5389	16.0863	-1.66406	0.000211071	1.44119	1.11463
61.4	17.5388	16.0862	-1.6709	0.000211069	1.43426	1.11456
61.5	17.5388	16.0862	-1.66016	0.000211067	1.42918	1.11449
61.6	17.5387	16.0861	-1.64746	0.000211064	1.42443	1.11442
61.7	17.5387	16.0861	-1.64062	0.000211062	1.42297	1.11434
61.8	17.5386	16.086	-1.62891	0.00021106	1.41947	1.11427
61.9	17.5386	16.086	-1.6084	0.000211058	1.41621	1.1142
62	17.5385	16.0859	-1.625	0.000211055	1.41479	1.11413
62.1	17.5385	16.0859	-1.62207	0.000211053	1.4127	1.11406
62.2	17.5383	16.0858	-1.5791	0.000211051	1.40979	1.11398
62.3	17.5383	16.0858	-1.56641	0.000211049	1.40697	1.11391
62.4	17.5382	16.0857	-1.56738	0.000211047	1.40406	1.11384
62.5	17.5381	16.0856	-1.55469	0.000211044	1.40193	1.11377
62.6	17.5381	16.0856	-1.55078	0.000211042	1.4002	1.11369
62.7	17.538	16.0855	-1.55273	0.00021104	1.39838	1.11362
62.8	17.538	16.0855	-1.55859	0.000211038	1.39617	1.11355
62.9	17.5379	16.0854	-1.54492	0.000211035	1.39438	1.11348
63	17.5379	16.0854	-1.54199	0.000211033	1.39229	1.1134
63.1	17.5378	16.0853	-1.54297	0.000211031	1.39061	1.11333
63.2	17.5378	16.0853	-1.54883	0.000211029	1.38863	1.11326
63.3	17.5377	16.0852	-1.52637	0.000211026	1.38754	1.11319
63.4	17.5377	16.0852	-1.51172	0.000211024	1.38516	1.11312
63.5	17.5376	16.0851	-1.5127	0.000211022	1.38338	1.11304
63.6	17.5376	16.0851	-1.49805	0.00021102	1.38117	1.11297
63.7	17.5375	16.085	-1.49805	0.000211017	1.37938	1.1129
63.8	17.5375	16.085	-1.48145	0.000211015	1.37777	1.11283
63.9	17.5374	16.0849	-1.48145	0.000211013	1.37637	1.11275
64	17.5374	16.0849	-1.47363	0.000211011	1.37453	1.11268
64.1	17.5373	16.0848	-1.47754	0.000211009	1.37281	1.11261
64.2	17.5373	16.0848	-1.45996	0.000211006	1.37143	1.11254
64.3	17.5371	16.0847	-1.45605	0.000211004	1.36988	1.11247
64.4	17.5371	16.0847	-1.45117	0.000211002	1.36816	1.11239
64.5	17.537	16.0846	-1.44727	0.000211	1.36688	1.11232
64.6	17.537	16.0846	-1.44629	0.000210997	1.36521	1.11225
64.7	17.5369	16.0845	-1.43945	0.000210995	1.36367	1.11218
64.8	17.5369	16.0845	-1.4375	0.000210993	1.36193	1.1121
64.9	17.5368	16.0844	-1.43066	0.000210991	1.36033	1.11203
65	17.5367	16.0843	-1.42969	0.000210988	1.35895	1.11196
65.1	17.5367	16.0843	-1.42383	0.000210986	1.35725	1.11189
65.2	17.5366	16.0842	-1.41602	0.000210984	1.35605	1.11182
65.3	17.5366	16.0842	-1.42188	0.000210982	1.35441	1.11174
65.4	17.5365	16.0841	-1.42188	0.000210979	1.35305	1.11167
65.5	17.5365	16.0841	-1.40723	0.000210977	1.35158	1.1116
65.6	17.5364	16.084	-1.39746	0.000210975	1.35016	1.11153
65.7	17.5364	16.084	-1.4082	0.000210973	1.34883	1.11145
65.8	17.5363	16.0839	-1.39355	0.00021097	1.34771	1.11138
65.9	17.5363	16.0839	-1.39551	0.000210968	1.34637	1.11131
66	17.5362	16.0838	-1.39453	0.000210966	1.34496	1.11124
66.1	17.5362	16.0838	-1.38574	0.000210964	1.34377	1.11117
66.2	17.5361	16.0837	-1.37598	0.000210962	1.34242	1.11109
66.3	17.5361	16.0837	-1.38184	0.000210959	1.34111	1.11102
66.4	17.5359	16.0836	-1.37207	0.000210957	1.33998	1.11095
66.5	17.5359	16.0836	-1.36914	0.000210955	1.33867	1.11088
66.6	17.5358	16.0835	-1.36035	0.000210953	1.33742	1.11081
66.7	17.5358	16.0835	-1.36328	0.00021095	1.33611	1.11073
66.8	17.5357	16.0834	-1.36035	0.000210948	1.33473	1.11066
66.9	17.5357	16.0834	-1.35156	0.000210946	1.33322	1.11059
67	17.5356	16.0833	-1.35645	0.000210944	1.33213	1.11052
67.1	17.5356	16.0833	-1.35059	0.000210941	1.33066	1.11044
67.2	17.5355	16.0832	-1.34375	0.000210939	1.3293	1.11037
67.3	17.5355	16.0832	-1.33398	0.000210937	1.32801	1.1103
67.4	17.5354	16.0831	-1.32813	0.000210935	1.32666	1.11023
67.5	17.5354	16.0831	-1.33105	0.000210932	1.32547	1.11016
67.6	17.5353	16.083	-1.32227	0.00021093	1.32406	1.11008
67.7	17.5352	16.0829	-1.3252	0.000210928	1.3227	1.11001
67.8	17.5352	16.0829	-1.31934	0.000210926	1.32152	1.10994
67.9	17.5351	16.0828	-1.3252	0.000210924	1.32041	1.10987
68	17.5351	16.0828	-1.32031	0.000210921	1.3193	1.1098
68.1	17.535	16.0827	-1.32324	0.000210919	1.31826	1.10972
68.2	17.535	16.0827	-1.3252	0.000210917	1.31701	1.10965
68.3	17.5349	16.0826	-1.32812	0.000210915	1.31592	1.10958
68.4	17.5349	16.0826	-1.31641	0.000210912	1.31482	1.10951
68.5	17.5347	16.0825	-1.32129	0.00021091	1.31377	1.10944
68.6	17.5347	16.0825	-1.31641	0.000210908	1.31264	1.10936
68.7	17.5346	16.0824	-1.31641	0.000210906	1.31162	1.10929
68.8	17.5346	16.0824	-1.31445	0.000210903	1.31051	1.10922
68.9	17.5345	16.0823	-1.31445	0.000210901	1.30924	1.10915
69	17.5345	16.0823	-1.30664	0.000210899	1.30801	1.10908
69.1	17.5344	16.0822	-1.30078	0.000210897	1.30689	1.109
69.2	17.5344	16.0822	-1.30371	0.000210894	1.30578	1.10893
69.3	17.5343	16.0821	-1.30566	0.000210892	1.30459	1.10886
69.4	17.5343	16.0821	-1.2998	0.00021089	1.30338	1.10879
69.5	17.5342	16.082	-1.2998	0.000210888	1.30217	1.10872
69.6	17.5342	16.082	-1.29492	0.000210886	1.301	1.10864
69.7	17.5341	16.0819	-1.29492	0.000210883	1.29973	1.10857
69.8	17.5341	16.0819	-1.29883	0.000210881	1.29836	1.1085
69.9	17.534	16.0818	-1.29297	0.000210879	1.29713	1.10843
70	17.534	16.0818	-1.29297	0.000210877	1.29596	1.10836
70.1	17.5339	16.0817	-1.29785	0.000210874	1.29463	1.10828
70.2	17.5338	16.0816	-1.29004	0.000210872	1.29348	1.10821
70.3	17.5338	16.0816	-1.28809	0.00021087	1.29209	1.10814
70.4	17.5337	16.0815	-1.27832	0.000210868	1.29096	1.10807
70.5	17.5337	16.0815	-1.27832	0.000210865	1.28969	1.108
70.6	17.5336	16.0814	-1.26855	0.000210863	1.28871	1.10792
70.7	17.5336	16.0814	-1.26855	0.000210861	1.28746	1.10785
70.8	17.5334	16.0813	-1.26855	0.000210859	1.2865	1.10778
70.9	17.5334	16.0813	-1.26855	0.000210856	1.28568	1.10771
71	17.5333	16.0812	-1.26562	0.000210854	1.28469	1.10764
71.1	17.5333	16.0812	-1.26855	0.000210852	1.28359	1.10756
71.2	17.5332	16.0811	-1.25391	0.00021085	1.28285	1.10749
71.3	17.5332	16.0811	-1.25879	0.000210848	1.28178	1.10742
71.4	17.5331	16.081	-1.25586	0.000210845	1.28086	1.10735
71.5	17.5331	16.081	-1.24902	0.000210843	1.27994	1.10728
71.6	17.533	16.0809	-1.24902	0.000210841	1.279	1.10721
71.7	17.533	16.0809	-1.24902	0.000210839	1.27803	1.10713
71.8	17.5329	16.0808	-1.24902	0.000210836	1.27717	1.10706
71.9	17.5329	16.0808	-1.24707	0.000210834	1.27623	1.10699
72	17.5328	16.0807	-1.24219	0.000210832	1.27514	1.10692
72.1	17.5328	16.0807	-1.24023	0.00021083	1.27393	1.10685
72.2	17.5327	16.0806	-1.24219	0.000210827	1.27311	1.10677
72.3	17.5327	16.0806	-1.23438	0.000210825	1.27207	1.1067
72.4	17.5326	16.0805	-1.23242	0.000210823	1.27107	1.10663
72.5	17.5326	16.0805	-1.2207	0.000210821	1.27018	1.10656
72.6	17.5325	16.0804	-1.22363	0.000210818	1.26912	1.10649
72.7	17.5325	16.0804	-1.22559	0.000210816	1.26799	1.10642
72.8	17.5324	16.0803	-1.22266	0.000210814	1.26713	1.10634
72.9	17.5322	16.0802	-1.22266	0.000210812	1.26602	1.10627
73	17.5322	16.0802	-1.21777	0.00021081	1.26512	1.1062
73.1	17.5321	16.0801	-1.21777	0.000210807	1.26422	1.10613
73.2	17.5321	16.0801	-1.2168	0.000210805	1.26326	1.10606
73.3	17.532	16.08	-1.20605	0.000210803	1.26236	1.10598
73.4	17.532	16.08	-1.20801	0.000210801	1.26141	1.10591
73.5	17.5319	16.0799	-1.20801	0.000210798	1.26025	1.10584
73.6	17.5319	16.0799	-1.19434	0.000210796	1.25949	1.10577
73.7	17.5318	16.0798	-1.20801	0.000210794	1.25828	1.1057
73.8	17.5318	16.0798	-1.19629	0.000210792	1.25762	1.10563
73.9	17.5317	16.0797	-1.19922	0.000210789	1.25648	1.10555
74	17.5317	16.0797	-1.18945	0.000210787	1.25547	1.10548
74.1	17.5316	16.0796	-1.19141	0.000210785	1.25457	1.10541
74.2	17.5316	16.0796	-1.18945	0.000210783	1.25357	1.10534
74.3	17.5315	16.0795	-1.19043	0.00021078	1.2526	1.10527
74.4	17.5315	16.0795	-1.18848	0.000210778	1.25164	1.10519
74.5	17.5314	16.0794	-1.19336	0.000210776	1.25051	1.10512
74.6	17.5314	16.0794	-1.18164	0.000210774	1.24961	1.10505
74.7	17.5313	16.0793	-1.18164	0.000210772	1.24842	1.10498
74.8	17.5313	16.0793	-1.17383	0.000210769	1.24758	1.10491
74.9	17.5312	16.0792	-1.17383	0.000210767	1.24664	1.10484
75	17.5312	16.0792	-1.17676	0.000210765	1.24588	1.10476
75.1	17.531	16.0791	-1.17578	0.000210763	1.24518	1.10469
75.2	17.531	16.0791	-1.17676	0.00021076	1.24434	1.10462
75.3	17.5309	16.079	-1.17871	0.000210758	1.24346	1.10455
75.4	17.5308	16.0789	-1.16504	0.000210756	1.24268	1.10448
75.5	17.5308	16.0789	-1.16504	0.000210754	1.24166	1.10441
75.6	17.5307	16.0788	-1.16992	0.000210751	1.24092	1.10433
75.7	17.5307	16.0788	-1.16211	0.000210749	1.2401	1.10426
75.8	17.5306	16.0787	-1.15039	0.000210747	1.23949	1.10419
75.9	17.5306	16.0787	-1.14844	0.000210745	1.23879	1.10412
76	17.5305	16.0786	-1.15039	0.000210743	1.23791	1.10405
76.1	17.5305	16.0786	-1.15332	0.00021074	1.23684	1.10398
76.2	17.5304	16.0785	-1.15332	0.000210738	1.23594	1.1039
76.3	17.5304	16.0785	-1.15332	0.000210736	1.235	1.10383
76.4	17.5303	16.0784	-1.15332	0.000210734	1.23408	1.10376
76.5	17.5303	16.0784	-1.15332	0.000210731	1.23328	1.10369
76.6	17.5302	16.0783	-1.15039	0.000210729	1.2324	1.10362
76.7	17.5302	16.0783	-1.13867	0.000210727	1.23152	1.10355
76.8	17.5301	16.0782	-1.1416	0.000210725	1.23066	1.10347
76.9	17.5301	16.0782	-1.1416	0.000210722	1.22971	1.1034
77	17.53	16.0781	-1.14453	0.00021072	1.22869	1.10333
77.1	17.53	16.0781	-1.1416	0.000210718	1.22787	1.10326
77.2	17.5298	16.078	-1.13867	0.000210716	1.22713	1.10319
77.3	17.5298	16.078	-1.13086	0.000210713	1.22627	1.10312
77.4	17.5297	16.0779	-1.13086	0.000210711	1.22545	1.10304
77.5	17.5297	16.0779	-1.13379	0.000210709	1.22461	1.10297
77.6	17.5296	16.0778	-1.13379	0.000210707	1.22391	1.1029
77.7	17.5296	16.0778	-1.11914	0.000210705	1.22303	1.10283
77.8	17.5295	16.0777	-1.11914	0.000210702	1.22219	1.10276
77.9	17.5295	16.0777	-1.12305	0.0002107	1.22162	1.10269
78	17.5294	16.0776	-1.12305	0.000210698	1.22072	1.10261
78.1	17.5293	16.0775	-1.12012	0.000210696	1.22006	1.10254
78.2	17.5293	16.0775	-1.12305	0.000210693	1.21938	1.10247
78.3	17.5292	16.0774	-1.12012	0.000210691	1.21857	1.1024
78.4	17.5292	16.0774	-1.12207	0.000210689	1.21803	1.10233
78.5	17.5291	16.0773	-1.12207	0.000210687	1.21746	1.10226
78.6	17.5291	16.0773	-1.12012	0.000210684	1.21689	1.10219
78.7	17.529	16.0772	-1.12012	0.000210682	1.21621	1.10211
78.8	17.529	16.0772	-1.12207	0.00021068	1.21551	1.10204
78.9	17.5289	16.0771	-1.12207	0.000210678	1.21471	1.10197
79	17.5289	16.0771	-1.12207	0.000210675	1.21396	1.1019
79.1	17.5288	16.077	-1.11426	0.000210673	1.21328	1.10183
79.2	17.5288	16.077	-1.11426	0.000210671	1.21271	1.10176
79.3	17.5286	16.0769	-1.10938	0.000210669	1.21213	1.10168
79.4	17.5286	16.0769	-1.11719	0.000210667	1.21133	1.10161
79.5	17.5285	16.0768	-1.11914	0.000210664	1.21068	1.10154
79.6	17.5285	16.0768	-1.11719	0.000210662	1.20996	1.10147
79.7	17.5284	16.0767	-1.11523	0.00021066	1.20926	1.1014
79.8	17.5284	16.0767	-1.11523	0.000210658	1.20848	1.10133
79.9	17.5283	16.0766	-1.11719	0.000210655	1.20781	1.10126
80	17.5283	16.0766	-1.10938	0.000210653	1.20711	1.10118
80.1	17.5282	16.0765	-1.11426	0.000210651	1.20643	1.10111
80.2	17.5282	16.0765	-1.10352	0.000210649	1.2058	1.10104
80.3	17.5281	16.0764	-1.11133	0.000210646	1.20488	1.10097
80.4	17.5281	16.0764	-1.1084	0.000210644	1.20406	1.1009
80.5	17.528	16.0763	-1.1084	0.000210642	1.2034	1.10083
80.6	17.5279	16.0762	-1.10937	0.00021064	1.20277	1.10076
80.7	17.5279	16.0762	-1.10645	0.000210638	1.20197	1.10068
80.8	17.5278	16.0761	-1.09863	0.000210635	1.20133	1.10061
80.9	17.5278	16.0761	-1.10645	0.000210633	1.20072	1.10054
81	17.5277	16.076	-1.10742	0.000210631	1.20002	1.10047
81.1	17.5277	16.076	-1.10742	0.000210629	1.19922	1.1004
81.2	17.5276	16.0759	-1.10742	0.000210626	1.1985	1.10033
81.3	17.5276	16.0759	-1.10742	0.000210624	1.19779	1.10026
81.4	17.5274	16.0758	-1.10742	0.000210622	1.19707	1.10018
81.5	17.5274	16.0758	-1.10742	0.00021062	1.19662	1.10011
81.6	17.5273	16.0757	-1.10449	0.000210617	1.19592	1.10004
81.7	17.5273	16.0757	-1.10449	0.000210615	1.19523	1.09997
81.8	17.5272	16.0756	-1.12109	0.000210613	1.19451	1.0999
81.9	17.5272	16.0756	-1.12109	0.000210611	1.19387	1.09983
82	17.5271	16.0755	-1.12109	0.000210609	1.19318	1.09976
82.1	17.5271	16.0755	-1.12109	0.000210606	1.19254	1.09968
82.2	17.527	16.0754	-1.12207	0.000210604	1.19182	1.09961
82.3	17.527	16.0754	-1.11914	0.000210602	1.19123	1.09954
82.4	17.5269	16.0753	-1.12402	0.0002106	1.19072	1.09947
82.5	17.5269	16.0753	-1.12402	0.000210597	1.19006	1.0994
82.6	17.5268	16.0752	-1.12402	0.000210595	1.18947	1.09933
82.7	17.5268	16.0752	-1.12109	0.000210593	1.18879	1.09926
82.8	17.5267	16.0751	-1.12402	0.000210591	1.18818	1.09918
82.9	17.5267	16.0751	-1.12598	0.000210588	1.18736	1.09911
83	17.5266	16.075	-1.12598	0.000210586	1.18676	1.09904
83.1	17.5266	16.075	-1.12598	0.000210584	1.18623	1.09897
83.2	17.5265	16.0749	-1.12598	0.000210582	1.18568	1.0989
83.3	17.5264	16.0748	-1.11426	0.000210579	1.18502	1.09883
83.4	17.5264	16.0748	-1.11426	0.000210577	1.18459	1.09876
83.5	17.5262	16.0747	-1.11426	0.000210575	1.18398	1.09868
83.6	17.5262	16.0747	-1.11426	0.000210573	1.18324	1.09861
83.7	17.5261	16.0746	-1.11133	0.000210571	1.1827	1.09854
83.8	17.5261	16.0746	-1.12305	0.000210568	1.18209	1.09847
83.9	17.526	16.0745	-1.11133	0.000210566	1.18143	1.0984
84	17.526	16.0745	-1.11133	0.000210564	1.18098	1.09833
84.1	17.5259	16.0744	-1.11133	0.000210562	1.18027	1.09826
84.2	17.5259	16.0744	-1.11426	0.000210559	1.17977	1.09819
84.3	17.5258	16.0743	-1.11426	0.000210557	1.17922	1.09811
84.4	17.5258	16.0743	-1.11133	0.000210555	1.17867	1.09804
84.5	17.5257	16.0742	-1.12012	0.000210553	1.17813	1.09797
84.6	17.5257	16.0742	-1.1123	0.00021055	1.17748	1.0979
84.7	17.5256	16.0741	-1.1123	0.000210548	1.17691	1.09783
84.8	17.5256	16.0741	-1.1123	0.000210546	1.17641	1.09776
84.9	17.5255	16.074	-1.1123	0.000210544	1.17584	1.09769
85	17.5255	16.074	-1.12012	0.000210542	1.17537	1.09762
85.1	17.5254	16.0739	-1.11426	0.000210539	1.17473	1.09754
85.2	17.5254	16.0739	-1.11621	0.000210537	1.17412	1.09747
85.3	17.5253	16.0738	-1.11914	0.000210535	1.17359	1.0974
85.4	17.5253	16.0738	-1.125	0.000210533	1.17305	1.09733
85.5	17.5252	16.0737	-1.12207	0.00021053	1.17264	1.09726
85.6	17.5252	16.0737	-1.12695	0.000210528	1.17203	1.09719
85.7	17.525	16.0736	-1.12695	0.000210526	1.17158	1.09712
85.8	17.525	16.0736	-1.12695	0.000210524	1.17098	1.09705
85.9	17.5249	16.0735	-1.12988	0.000210521	1.17055	1.09697
86	17.5248	16.0734	-1.11816	0.000210519	1.16986	1.0969
86.1	17.5248	16.0734	-1.11816	0.000210517	1.16941	1.09683
86.2	17.5247	16.0733	-1.11523	0.000210515	1.16877	1.09676
86.3	17.5247	16.0733	-1.12402	0.000210513	1.1682	1.09669
86.4	17.5246	16.0732	-1.1123	0.00021051	1.16758	1.09662
86.5	17.5246	16.0732	-1.11523	0.000210508	1.16707	1.09655
86.6	17.5245	16.0731	-1.11816	0.000210506	1.16646	1.09648
86.7	17.5245	16.0731	-1.11816	0.000210504	1.16598	1.0964
86.8	17.5244	16.073	-1.11523	0.000210501	1.16541	1.09633
86.9	17.5244	16.073	-1.11523	0.000210499	1.16502	1.09626
87	17.5243	16.0729	-1.11523	0.000210497	1.16449	1.09619
87.1	17.5243	16.0729	-1.11523	0.000210495	1.16389	1.09612
87.2	17.5242	16.0728	-1.11816	0.000210492	1.16338	1.09605
87.3	17.5242	16.0728	-1.11719	0.00021049	1.16291	1.09598
87.4	17.5241	16.0727	-1.11523	0.000210488	1.16227	1.09591
87.5	17.5241	16.0727	-1.125	0.000210486	1.16188	1.09584
87.6	17.524	16.0726	-1.125	0.000210484	1.16131	1.09576
87.7	17.524	16.0726	-1.12207	0.000210481	1.16088	1.09569
87.8	17.5238	16.0725	-1.12207	0.000210479	1.16031	1.09562
87.9	17.5238	16.0725	-1.11914	0.000210477	1.1598	1.09555
88	17.5237	16.0724	-1.11426	0.000210475	1.15938	1.09548
88.1	17.5237	16.0724	-1.11621	0.000210472	1.15877	1.09541
88.2	17.5236	16.0723	-1.11914	0.00021047	1.15826	1.09534
88.3	17.5236	16.0723	-1.11914	0.000210468	1.15779	1.09527
88.4	17.5235	16.0722	-1.11914	0.000210466	1.15729	1.0952
88.5	17.5234	16.0721	-1.11719	0.000210463	1.15688	1.09512
88.6	17.5234	16.0721	-1.11719	0.000210461	1.15648	1.09505
88.7	17.5233	16.072	-1.11719	0.000210459	1.15609	1.09498
88.8	17.5233	16.072	-1.11426	0.000210457	1.15564	1.09491
88.9	17.5232	16.0719	-1.12012	0.000210455	1.15514	1.09484
89	17.5232	16.0719	-1.12012	0.000210452	1.15469	1.09477
89.1	17.5231	16.0718	-1.12305	0.00021045	1.1543	1.0947
89.2	17.5231	16.0718	-1.12012	0.000210448	1.15391	1.09463
89.3	17.523	16.0717	-1.13184	0.000210446	1.15352	1.09456
89.4	17.523	16.0717	-1.13184	0.000210443	1.15303	1.09448
89.5	17.5229	16.0716	-1.13184	0.000210441	1.15264	1.09441
89.6	17.5229	16.0716	-1.13184	0.000210439	1.15207	1.09434
89.7	17.5228	16.0715	-1.13965	0.000210437	1.15152	1.09427
89.8	17.5228	16.0715	-1.13379	0.000210434	1.15125	1.0942
89.9	17.5226	16.0714	-1.13672	0.000210432	1.15078	1.09413
90	17.5226	16.0714	-1.14844	0.00021043	1.15037	1.09406
90.1	17.5225	16.0713	-1.14844	0.000210428	1.14994	1.09399
90.2	17.5225	16.0713	-1.14551	0.000210426	1.14949	1.09392
90.3	17.5224	16.0712	-1.14551	0.000210423	1.14898	1.09385
90.4	17.5224	16.0712	-1.14551	0.000210421	1.14857	1.09377
90.5	17.5223	16.0711	-1.14355	0.000210419	1.14822	1.0937
90.6	17.5223	16.0711	-1.15527	0.000210417	1.1477	1.09363
90.7	17.5222	16.071	-1.15039	0.000210414	1.14723	1.09356
90.8	17.5222	16.071	-1.15039	0.000210412	1.14674	1.09349
90.9	17.5221	16.0709	-1.14746	0.00021041	1.14643	1.09342
91	17.5221	16.0709	-1.14746	0.000210408	1.14588	1.09335
91.1	17.522	16.0708	-1.14551	0.000210405	1.14547	1.09328
91.2	17.5219	16.0707	-1.14551	0.000210403	1.14502	1.09321
91.3	17.5219	16.0707	-1.14551	0.000210401	1.14467	1.09314
91.4	17.5218	16.0706	-1.14355	0.000210399	1.1441	1.09306
91.5	17.5218	16.0706	-1.15137	0.000210397	1.14357	1.09299
91.6	17.5217	16.0705	-1.14844	0.000210394	1.14324	1.09292
91.7	17.5217	16.0705	-1.14941	0.000210392	1.14277	1.09285
91.8	17.5216	16.0704	-1.14062	0.00021039	1.14238	1.09278
91.9	17.5216	16.0704	-1.14062	0.000210388	1.14193	1.09271
92	17.5214	16.0703	-1.14941	0.000210385	1.14154	1.09264
92.1	17.5214	16.0703	-1.14355	0.000210383	1.14113	1.09257
92.2	17.5213	16.0702	-1.14648	0.000210381	1.14072	1.0925
92.3	17.5213	16.0702	-1.14648	0.000210379	1.14025	1.09243
92.4	17.5212	16.0701	-1.14844	0.000210376	1.13988	1.09236
92.5	17.5212	16.0701	-1.14844	0.000210374	1.13932	1.09228
92.6	17.5211	16.07	-1.14258	0.000210372	1.13902	1.09221
92.7	17.5211	16.07	-1.14453	0.00021037	1.13867	1.09214
92.8	17.521	16.0699	-1.14746	0.000210368	1.13816	1.09207
92.9	17.521	16.0699	-1.14258	0.000210365	1.13777	1.092
93	17.5209	16.0698	-1.14258	0.000210363	1.13746	1.09193
93.1	17.5209	16.0698	-1.14258	0.000210361	1.13711	1.09186
93.2	17.5208	16.0697	-1.14551	0.000210359	1.13662	1.09179
93.3	17.5208	16.0697	-1.14063	0.000210356	1.13621	1.09172
93.4	17.5207	16.0696	-1.14063	0.000210354	1.13588	1.09165
93.5	17.5207	16.0696	-1.14063	0.000210352	1.13535	1.09158
93.6	17.5206	16.0695	-1.14063	0.00021035	1.135	1.0915
93.7	17.5206	16.0695	-1.13281	0.000210347	1.13463	1.09143
93.8	17.5205	16.0694	-1.14551	0.000210345	1.1343	1.09136
93.9	17.5204	16.0693	-1.15039	0.000210343	1.13391	1.09129
94	17.5204	16.0693	-1.14258	0.000210341	1.13355	1.09122
94.1	17.5202	16.0692	-1.14844	0.000210339	1.13316	1.09115
94.2	17.5202	16.0692	-1.13965	0.000210336	1.13279	1.09108
94.3	17.5201	16.0691	-1.14258	0.000210334	1.13238	1.09101
94.4	17.5201	16.0691	-1.14453	0.000210332	1.13197	1.09094
94.5	17.52	16.069	-1.14453	0.00021033	1.13143	1.09087
94.6	17.52	16.069	-1.1377	0.000210327	1.13113	1.0908
94.7	17.5199	16.0689	-1.14063	0.000210325	1.13078	1.09073
94.8	17.5199	16.0689	-1.14063	0.000210323	1.13043	1.09065
94.9	17.5198	16.0688	-1.13867	0.000210321	1.12992	1.09058
95	17.5198	16.0688	-1.14063	0.000210318	1.12967	1.09051
95.1	17.5197	16.0687	-1.14355	0.000210316	1.12918	1.09044
95.2	17.5197	16.0687	-1.1416	0.000210314	1.12873	1.09037
95.3	17.5196	16.0686	-1.14551	0.000210312	1.1285	1.0903
95.4	17.5196	16.0686	-1.15039	0.00021031	1.12811	1.09023
95.5	17.5195	16.0685	-1.15039	0.000210307	1.12777	1.09016
95.6	17.5195	16.0685	-1.15039	0.000210305	1.12742	1.09009
95.7	17.5194	16.0684	-1.15332	0.000210303	1.12703	1.09002
95.8	17.5194	16.0684	-1.1416	0.000210301	1.12662	1.08995
95.9	17.5193	16.0683	-1.1416	0.000210298	1.12627	1.08988
96	17.5193	16.0683	-1.14648	0.000210296	1.12598	1.08981
96.1	17.5192	16.0682	-1.14355	0.000210294	1.12566	1.08973
96.2	17.5192	16.0682	-1.1416	0.000210292	1.12527	1.08966
96.3	17.519	16.0681	-1.14063	0.00021029	1.12498	1.08959
96.4	17.5189	16.068	-1.14356	0.000210287	1.12463	1.08952
96.5	17.5189	16.068	-1.14355	0.000210285	1.12426	1.08945
96.6	17.5188	16.0679	-1.15137	0.000210283	1.12391	1.08938
96.7	17.5188	16.0679	-1.14844	0.000210281	1.12365	1.08931
96.8	17.5187	16.0678	-1.1416	0.000210278	1.1232	1.08924
96.9	17.5187	16.0678	-1.13965	0.000210276	1.12299	1.08917
97	17.5186	16.0677	-1.13477	0.000210274	1.12271	1.0891
97.1	17.5186	16.0677	-1.13281	0.000210272	1.12232	1.08903
97.2	17.5185	16.0676	-1.13184	0.000210269	1.12197	1.08896
97.3	17.5185	16.0676	-1.1416	0.000210267	1.12172	1.08889
97.4	17.5184	16.0675	-1.1416	0.000210265	1.12139	1.08881
97.5	17.5184	16.0675	-1.1416	0.000210263	1.12111	1.08874
97.6	17.5183	16.0674	-1.13867	0.000210261	1.12072	1.08867
97.7	17.5183	16.0674	-1.13086	0.000210258	1.12049	1.0886
97.8	17.5182	16.0673	-1.13086	0.000210256	1.12021	1.08853
97.9	17.5182	16.0673	-1.1416	0.000210254	1.11988	1.08846
98	17.5181	16.0672	-1.12695	0.000210252	1.11961	1.08839
98.1	17.5181	16.0672	-1.12012	0.000210249	1.11928	1.08832
98.2	17.518	16.0671	-1.13379	0.000210247	1.11904	1.08825
98.3	17.518	16.0671	-1.13965	0.000210245	1.11879	1.08818
98.4	17.5179	16.067	-1.13672	0.000210243	1.11838	1.08811
98.5	17.5179	16.067	-1.125	0.00021024	1.11813	1.08804
98.6	17.5177	16.0669	-1.13965	0.000210238	1.11766	1.08797
98.7	17.5177	16.0669	-1.13477	0.000210236	1.11744	1.0879
98.8	17.5176	16.0668	-1.12891	0.000210234	1.11717	1.08783
98.9	17.5176	16.0668	-1.125	0.000210232	1.11684	1.08776
99	17.5175	16.0667	-1.13769	0.000210229	1.11648	1.08768
99.1	17.5174	16.0666	-1.14551	0.000210227	1.11619	1.08761
99.2	17.5174	16.0666	-1.1377	0.000210225	1.11592	1.08754
99.3	17.5173	16.0665	-1.14258	0.000210223	1.11557	1.08747
99.4	17.5173	16.0665	-1.14356	0.00021022	1.11523	1.0874
99.5	17.5172	16.0664	-1.14844	0.000210218	1.11502	1.08733
99.6	17.5172	16.0664	-1.14355	0.000210216	1.11463	1.08726
99.7	17.5171	16.0663	-1.1377	0.000210214	1.11443	1.08719
99.8	17.5171	16.0663	-1.14746	0.000210212	1.11408	1.08712
99.9	17.517	16.0662	-1.15039	0.000210209	1.11377	1.08705
100	17.517	16.0662	-1.15137	0.000210207	1.11346	1.08698
100.1	17.5169	16.0661	-1.14844	0.000210205	1.11324	1.08691
100.2	17.5169	16.0661	-1.14258	0.000210203	1.11289	1.08684
100.3	17.5168	16.066	-1.13965	0.0002102	1.1125	1.08677
100.4	17.5168	16.066	-1.14551	0.000210198	1.11217	1.0867
100.5	17.5167	16.0659	-1.14453	0.000210196	1.11188	1.08663
100.6	17.5167	16.0659	-1.14453	0.000210194	1.11146	1.08656
100.7	17.5165	16.0658	-1.13184	0.000210191	1.11113	1.08648
100.8	17.5165	16.0658	-1.13477	0.000210189	1.11086	1.08641
100.9	17.5164	16.0657	-1.13184	0.000210187	1.11053	1.08634
101	17.5164	16.0657	-1.13477	0.000210185	1.11027	1.08627
101.1	17.5163	16.0656	-1.1377	0.000210183	1.11008	1.0862
101.2	17.5163	16.0656	-1.12402	0.00021018	1.10973	1.08613
101.3	17.5162	16.0655	-1.12207	0.000210178	1.10953	1.08606
101.4	17.5162	16.0655	-1.125	0.000210176	1.10928	1.08599
101.5	17.5161	16.0654	-1.11523	0.000210174	1.10898	1.08592
101.6	17.5161	16.0654	-1.11719	0.000210171	1.10863	1.08585
101.7	17.516	16.0653	-1.11719	0.000210169	1.10834	1.08578
101.8	17.5159	16.0652	-1.1123	0.000210167	1.10807	1.08571
101.9	17.5159	16.0652	-1.10352	0.000210165	1.10777	1.08564
102	17.5158	16.0651	-1.11035	0.000210162	1.10752	1.08557
102.1	17.5158	16.0651	-1.1123	0.00021016	1.10717	1.0855
102.2	17.5157	16.065	-1.11035	0.000210158	1.10693	1.08543
102.3	17.5157	16.065	-1.0957	0.000210156	1.10662	1.08536
102.4	17.5156	16.0649	-1.09766	0.000210154	1.10637	1.08529
102.5	17.5156	16.0649	-1.09375	0.000210151	1.10605	1.08522
102.6	17.5155	16.0648	-1.08887	0.000210149	1.1057	1.08515
102.7	17.5155	16.0648	-1.0918	0.000210147	1.10555	1.08508
102.8	17.5153	16.0647	-1.0918	0.000210145	1.10527	1.085
102.9	17.5153	16.0647	-1.08691	0.000210142	1.10492	1.08493
103	17.5152	16.0646	-1.08398	0.00021014	1.10457	1.08486
103.1	17.5152	16.0646	-1.08398	0.000210138	1.1043	1.08479
103.2	17.5151	16.0645	-1.08398	0.000210136	1.10408	1.08472
103.3	17.5151	16.0645	-1.08301	0.000210134	1.10381	1.08465
103.4	17.515	16.0644	-1.08594	0.000210131	1.10352	1.08458
103.5	17.515	16.0644	-1.08301	0.000210129	1.10313	1.08451
103.6	17.5149	16.0643	-1.08594	0.000210127	1.10291	1.08444
103.7	17.5149	16.0643	-1.08301	0.000210125	1.10256	1.08437
103.8	17.5148	16.0642	-1.08008	0.000210122	1.10234	1.0843
103.9	17.5148	16.0642	-1.06836	0.00021012	1.10211	1.08423
104	17.5147	16.0641	-1.06836	0.000210118	1.10176	1.08416
104.1	17.5147	16.0641	-1.06641	0.000210116	1.10143	1.08409
104.2	17.5146	16.064	-1.06641	0.000210113	1.10113	1.08402
104.3	17.5146	16.064	-1.07813	0.000210111	1.10078	1.08395
104.4	17.5145	16.0639	-1.07617	0.000210109	1.10057	1.08388
104.5	17.5144	16.0638	-1.07031	0.000210107	1.10023	1.08381
104.6	17.5144	16.0638	-1.07324	0.000210105	1.10004	1.08374
104.7	17.5143	16.0637	-1.07324	0.000210102	1.09979	1.08367
104.8	17.5143	16.0637	-1.07324	0.0002101	1.09941	1.0836
104.9	17.5141	16.0636	-1.07324	0.000210098	1.09914	1.08353
105	17.5141	16.0636	-1.08301	0.000210096	1.09879	1.08346
105.1	17.514	16.0635	-1.0752	0.000210093	1.09857	1.08339
105.2	17.514	16.0635	-1.07324	0.000210091	1.09822	1.08332
105.3	17.5139	16.0634	-1.07324	0.000210089	1.09801	1.08325
105.4	17.5139	16.0634	-1.07324	0.000210087	1.09779	1.08317
105.5	17.5138	16.0633	-1.07617	0.000210085	1.09756	1.0831
105.6	17.5138	16.0633	-1.0752	0.000210082	1.09734	1.08303
105.7	17.5137	16.0632	-1.06348	0.00021008	1.09705	1.08296
105.8	17.5137	16.0632	-1.06641	0.000210078	1.09676	1.08289
105.9	17.5136	16.0631	-1.06348	0.000210076	1.09641	1.08282
106	17.5136	16.0631	-1.07129	0.000210073	1.09611	1.08275
106.1	17.5135	16.063	-1.06836	0.000210071	1.09594	1.08268
106.2	17.5135	16.063	-1.07324	0.000210069	1.09568	1.08261
106.3	17.5134	16.0629	-1.07617	0.000210067	1.09543	1.08254
106.4	17.5134	16.0629	-1.07617	0.000210064	1.09516	1.08247
106.5	17.5133	16.0628	-1.07324	0.000210062	1.09502	1.0824
106.6	17.5133	16.0628	-1.08496	0.00021006	1.09459	1.08233
106.7	17.5132	16.0627	-1.08496	0.000210058	1.09441	1.08226
106.8	17.5132	16.0627	-1.09277	0.000210056	1.09414	1.08219
106.9	17.5131	16.0626	-1.0957	0.000210053	1.09383	1.08212
107	17.5131	16.0626	-1.09082	0.000210051	1.09359	1.08205
107.1	17.5129	16.0625	-1.09082	0.000210049	1.09338	1.08198
107.2	17.5128	16.0624	-1.09082	0.000210047	1.09309	1.08191
107.3	17.5128	16.0624	-1.09082	0.000210044	1.09287	1.08184
107.4	17.5127	16.0623	-1.09961	0.000210042	1.09252	1.08177
107.5	17.5127	16.0623	-1.08984	0.00021004	1.09236	1.0817
107.6	17.5126	16.0622	-1.09961	0.000210038	1.09213	1.08163
107.7	17.5126	16.0622	-1.09961	0.000210036	1.09197	1.08156
107.8	17.5125	16.0621	-1.10156	0.000210033	1.09174	1.08149
107.9	17.5125	16.0621	-1.1123	0.000210031	1.09156	1.08142
108	17.5124	16.062	-1.10742	0.000210029	1.09133	1.08135
108.1	17.5124	16.062	-1.10742	0.000210027	1.09113	1.08128
108.2	17.5123	16.0619	-1.10449	0.000210024	1.091	1.08121
108.3	17.5123	16.0619	-1.11816	0.000210022	1.09072	1.08114
108.4	17.5122	16.0618	-1.11719	0.00021002	1.09047	1.08107
108.5	17.5122	16.0618	-1.11719	0.000210018	1.09039	1.081
108.6	17.5121	16.0617	-1.11426	0.000210016	1.09012	1.08093
108.7	17.5121	16.0617	-1.125	0.000210013	1.08998	1.08086
108.8	17.512	16.0616	-1.12207	0.000210011	1.08973	1.08079
108.9	17.512	16.0616	-1.13672	0.000210009	1.08941	1.08072
109	17.5119	16.0615	-1.13086	0.000210007	1.0892	1.08065
109.1	17.5119	16.0615	-1.13379	0.000210004	1.08904	1.08058
109.2	17.5117	16.0614	-1.13379	0.000210002	1.08879	1.08051
109.3	17.5117	16.0614	-1.13184	0.00021	1.08857	1.08044
109.4	17.5116	16.0613	-1.125	0.000209998	1.08844	1.08037
109.5	17.5116	16.0613	-1.12207	0.000209995	1.08816	1.0803
109.6	17.5115	16.0612	-1.12305	0.000209993	1.08787	1.08023
109.7	17.5115	16.0612	-1.12305	0.000209991	1.08783	1.08016
109.8	17.5114	16.0611	-1.12012	0.000209989	1.08748	1.08009
109.9	17.5113	16.061	-1.12305	0.000209987	1.08727	1.08002
110	17.5113	16.061	-1.13672	0.000209984	1.08709	1.07994
110.1	17.5112	16.0609	-1.13672	0.000209982	1.08686	1.07987
110.2	17.5112	16.0609	-1.13477	0.00020998	1.08656	1.0798
110.3	17.5111	16.0608	-1.13672	0.000209978	1.08641	1.07973
110.4	17.5111	16.0608	-1.13379	0.000209975	1.08617	1.07966
110.5	17.511	16.0607	-1.13379	0.000209973	1.08592	1.07959
110.6	17.511	16.0607	-1.13379	0.000209971	1.08572	1.07952
110.7	17.5109	16.0606	-1.13672	0.000209969	1.08549	1.07945
110.8	17.5109	16.0606	-1.13672	0.000209967	1.08521	1.07938
110.9	17.5108	16.0605	-1.13672	0.000209964	1.08504	1.07931
111	17.5108	16.0605	-1.13672	0.000209962	1.08488	1.07924
111.1	17.5107	16.0604	-1.13672	0.00020996	1.08465	1.07917
111.2	17.5107	16.0604	-1.13672	0.000209958	1.08436	1.0791
111.3	17.5105	16.0603	-1.13672	0.000209955	1.08418	1.07903
111.4	17.5105	16.0603	-1.13672	0.000209953	1.08402	1.07896
111.5	17.5104	16.0602	-1.13477	0.000209951	1.08379	1.07889
111.6	17.5104	16.0602	-1.13672	0.000209949	1.08361	1.07882
111.7	17.5103	16.0601	-1.13379	0.000209947	1.08346	1.07875
111.8	17.5103	16.0601	-1.13379	0.000209944	1.08322	1.07868
111.9	17.5102	16.06	-1.13184	0.000209942	1.08293	1.07861
112	17.5102	16.06	-1.13184	0.00020994	1.08275	1.07854
112.1	17.5101	16.0599	-1.13086	0.000209938	1.08242	1.07847
112.2	17.5101	16.0599	-1.13086	0.000209935	1.08229	1.0784
112.3	17.51	16.0598	-1.12891	0.000209933	1.08213	1.07833
112.4	17.51	16.0598	-1.13281	0.000209931	1.08182	1.07826
112.5	17.5099	16.0597	-1.13086	0.000209929	1.08168	1.07819
112.6	17.5098	16.0596	-1.11914	0.000209926	1.08143	1.07812
112.7	17.5098	16.0596	-1.12109	0.000209924	1.08127	1.07805
112.8	17.5097	16.0595	-1.12109	0.000209922	1.08104	1.07798
112.9	17.5097	16.0595	-1.11133	0.00020992	1.08084	1.07791
113	17.5096	16.0594	-1.11328	0.000209918	1.08063	1.07784
113.1	17.5096	16.0594	-1.11328	0.000209915	1.08027	1.07777
113.2	17.5095	16.0593	-1.11328	0.000209913	1.08012	1.0777
113.3	17.5095	16.0593	-1.12109	0.000209911	1.07994	1.07763
113.4	17.5093	16.0592	-1.11328	0.000209909	1.07971	1.07756
113.5	17.5093	16.0592	-1.11328	0.000209906	1.07947	1.07749
113.6	17.5092	16.0591	-1.11621	0.000209904	1.07928	1.07742
113.7	17.5092	16.0591	-1.11133	0.000209902	1.07908	1.07735
113.8	17.5091	16.059	-1.11328	0.0002099	1.07883	1.07728
113.9	17.5091	16.059	-1.11328	0.000209898	1.07861	1.07721
114	17.509	16.0589	-1.11133	0.000209895	1.07844	1.07714
114.1	17.509	16.0589	-1.10059	0.000209893	1.07822	1.07707
114.2	17.5089	16.0588	-1.10059	0.000209891	1.07809	1.077
114.3	17.5089	16.0588	-1.10059	0.000209889	1.07787	1.07693
114.4	17.5088	16.0587	-1.10254	0.000209886	1.07758	1.07686
114.5	17.5088	16.0587	-1.10254	0.000209884	1.07748	1.07679
114.6	17.5087	16.0586	-1.10547	0.000209882	1.07723	1.07672
114.7	17.5087	16.0586	-1.10547	0.00020988	1.07707	1.07665
114.8	17.5086	16.0585	-1.10547	0.000209878	1.07688	1.07658
114.9	17.5086	16.0585	-1.10547	0.000209875	1.07668	1.07651
115	17.5085	16.0584	-1.09766	0.000209873	1.07648	1.07645
115.1	17.5085	16.0584	-1.09766	0.000209871	1.07627	1.07638
115.2	17.5084	16.0583	-1.10547	0.000209869	1.07605	1.07631
115.3	17.5083	16.0582	-1.11035	0.000209866	1.07594	1.07624
115.4	17.5083	16.0582	-1.10742	0.000209864	1.0757	1.07617
115.5	17.5081	16.0581	-1.10742	0.000209862	1.07555	1.0761
115.6	17.5081	16.0581	-1.10547	0.00020986	1.07529	1.07603
115.7	17.508	16.058	-1.10547	0.000209858	1.07508	1.07596
115.8	17.508	16.058	-1.12012	0.000209855	1.07488	1.07589
115.9	17.5079	16.0579	-1.11426	0.000209853	1.07473	1.07582
116	17.5079	16.0579	-1.10547	0.000209851	1.07451	1.07575
116.1	17.5078	16.0578	-1.10547	0.000209849	1.07434	1.07568
116.2	17.5078	16.0578	-1.09473	0.000209846	1.07408	1.07561
116.3	17.5077	16.0577	-1.09473	0.000209844	1.07393	1.07554
116.4	17.5077	16.0577	-1.09473	0.000209842	1.07373	1.07547
116.5	17.5076	16.0576	-1.09473	0.00020984	1.07352	1.0754
116.6	17.5076	16.0576	-1.09473	0.000209837	1.0734	1.07533
116.7	17.5075	16.0575	-1.09766	0.000209835	1.07316	1.07526
116.8	17.5075	16.0575	-1.09961	0.000209833	1.07297	1.07519
116.9	17.5074	16.0574	-1.09961	0.000209831	1.07283	1.07512
117	17.5074	16.0574	-1.09961	0.000209829	1.07256	1.07505
117.1	17.5073	16.0573	-1.09766	0.000209826	1.07236	1.07498
117.2	17.5073	16.0573	-1.09473	0.000209824	1.07223	1.07491
117.3	17.5072	16.0572	-1.09766	0.000209822	1.07197	1.07484
117.4	17.5072	16.0572	-1.09766	0.00020982	1.0718	1.07477
117.5	17.5071	16.0571	-1.09473	0.000209817	1.07168	1.0747
117.6	17.5071	16.0571	-1.09766	0.000209815	1.07146	1.07463
117.7	17.5069	16.057	-1.09766	0.000209813	1.07129	1.07456
117.8	17.5069	16.057	-1.09961	0.000209811	1.07111	1.07449
117.9	17.5068	16.0569	-1.09961	0.000209809	1.07082	1.07442
118	17.5067	16.0568	-1.10254	0.000209806	1.07072	1.07435
118.1	17.5067	16.0568	-1.10254	0.000209804	1.07037	1.07428
118.2	17.5066	16.0567	-1.10547	0.000209802	1.07031	1.07421
118.3	17.5066	16.0567	-1.10547	0.0002098	1.07004	1.07414
118.4	17.5065	16.0566	-1.10547	0.000209797	1.06986	1.07407
118.5	17.5065	16.0566	-1.10254	0.000209795	1.06975	1.074
118.6	17.5064	16.0565	-1.08887	0.000209793	1.06951	1.07393
118.7	17.5064	16.0565	-1.09082	0.000209791	1.06928	1.07386
118.8	17.5063	16.0564	-1.09082	0.000209789	1.06918	1.07379
118.9	17.5063	16.0564	-1.09082	0.000209786	1.06893	1.07372
119	17.5062	16.0563	-1.08887	0.000209784	1.06871	1.07365
119.1	17.5062	16.0563	-1.09082	0.000209782	1.06857	1.07358
119.2	17.5061	16.0562	-1.09375	0.00020978	1.06838	1.07351
119.3	17.5061	16.0562	-1.09375	0.000209777	1.0683	1.07344
119.4	17.506	16.0561	-1.08789	0.000209775	1.06807	1.07337
119.5	17.506	16.0561	-1.08301	0.000209773	1.06795	1.0733
119.6	17.5059	16.056	-1.08496	0.000209771	1.06777	1.07324
119.7	17.5059	16.056	-1.08789	0.000209769	1.0676	1.07317
119.8	17.5057	16.0559	-1.08496	0.000209766	1.06742	1.0731
119.9	17.5057	16.0559	-1.0791	0.000209764	1.06725	1.07303
120	17.5056	16.0558	-1.0791	0.000209762	1.06709	1.07296
120.1	17.5056	16.0558	-1.0791	0.00020976	1.06697	1.07289
120.2	17.5055	16.0557	-1.0791	0.000209757	1.06672	1.07282
120.3	17.5055	16.0557	-1.07324	0.000209755	1.06656	1.07275
120.4	17.5054	16.0556	-1.07617	0.000209753	1.06633	1.07268
120.5	17.5054	16.0556	-1.07324	0.000209751	1.06629	1.07261
120.6	17.5053	16.0555	-1.07617	0.000209749	1.06604	1.07254
120.7	17.5052	16.0554	-1.06738	0.000209746	1.0658	1.07247
120.8	17.5052	16.0554	-1.06152	0.000209744	1.06568	1.0724
120.9	17.5051	16.0553	-1.06445	0.000209742	1.06553	1.07233
121	17.5051	16.0553	-1.05664	0.00020974	1.06543	1.07226
121.1	17.505	16.0552	-1.05664	0.000209737	1.06512	1.07219
121.2	17.505	16.0552	-1.05664	0.000209735	1.065	1.07212
121.3	17.5049	16.0551	-1.05371	0.000209733	1.06482	1.07205
121.4	17.5049	16.0551	-1.05371	0.000209731	1.06457	1.07198
121.5	17.5048	16.055	-1.05078	0.000209729	1.06438	1.07191
121.6	17.5048	16.055	-1.05078	0.000209726	1.06432	1.07184
121.7	17.5047	16.0549	-1.04883	0.000209724	1.06406	1.07177
121.8	17.5047	16.0549	-1.05273	0.000209722	1.06389	1.0717
121.9	17.5045	16.0548	-1.04199	0.00020972	1.06373	1.07163
122	17.5045	16.0548	-1.04102	0.000209717	1.0635	1.07156
122.1	17.5044	16.0547	-1.04102	0.000209715	1.06346	1.07149
122.2	17.5044	16.0547	-1.03711	0.000209713	1.06332	1.07143
122.3	17.5043	16.0546	-1.03711	0.000209711	1.06328	1.07136
122.4	17.5043	16.0546	-1.04004	0.000209709	1.06305	1.07129
122.5	17.5042	16.0545	-1.04004	0.000209706	1.06293	1.07122
122.6	17.5042	16.0545	-1.03711	0.000209704	1.06275	1.07115
122.7	17.5041	16.0544	-1.03418	0.000209702	1.06264	1.07108
122.8	17.5041	16.0544	-1.03711	0.0002097	1.06248	1.07101
122.9	17.504	16.0543	-1.04883	0.000209697	1.06229	1.07094
123	17.504	16.0543	-1.03418	0.000209695	1.06213	1.07087
123.1	17.5039	16.0542	-1.04395	0.000209693	1.06182	1.0708
123.2	17.5039	16.0542	-1.0459	0.000209691	1.0617	1.07073
123.3	17.5038	16.0541	-1.04395	0.000209689	1.06154	1.07066
123.4	17.5037	16.054	-1.04395	0.000209686	1.06137	1.07059
123.5	17.5037	16.054	-1.04102	0.000209684	1.06133	1.07052
123.6	17.5036	16.0539	-1.04102	0.000209682	1.06119	1.07045
123.7	17.5036	16.0539	-1.03906	0.00020968	1.06102	1.07038
123.8	17.5035	16.0538	-1.03711	0.000209677	1.06092	1.07031
123.9	17.5035	16.0538	-1.03711	0.000209675	1.06068	1.07024
124	17.5033	16.0537	-1.02832	0.000209673	1.06063	1.07017
124.1	17.5033	16.0537	-1.03906	0.000209671	1.06041	1.0701
124.2	17.5032	16.0536	-1.03613	0.000209669	1.06027	1.07004
124.3	17.5032	16.0536	-1.03613	0.000209666	1.06016	1.06997
124.4	17.5031	16.0535	-1.0459	0.000209664	1.05998	1.0699
124.5	17.5031	16.0535	-1.0459	0.000209662	1.05982	1.06983
124.6	17.503	16.0534	-1.04297	0.00020966	1.05947	1.06976
124.7	17.503	16.0534	-1.05176	0.000209657	1.05947	1.06969
124.8	17.5029	16.0533	-1.05176	0.000209655	1.05926	1.06962
124.9	17.5029	16.0533	-1.05176	0.000209653	1.05908	1.06955
125	17.5028	16.0532	-1.05176	0.000209651	1.05887	1.06948
125.1	17.5028	16.0532	-1.05957	0.000209649	1.05867	1.06941
125.2	17.5027	16.0531	-1.05957	0.000209646	1.05852	1.06934
125.3	17.5027	16.0531	-1.05762	0.000209644	1.05834	1.06927
125.4	17.5026	16.053	-1.05762	0.000209642	1.05816	1.0692
125.5	17.5026	16.053	-1.05957	0.00020964	1.05807	1.06913
125.6	17.5025	16.0529	-1.05762	0.000209637	1.05795	1.06906
125.7	17.5025	16.0529	-1.05957	0.000209635	1.05777	1.06899
125.8	17.5024	16.0528	-1.05566	0.000209633	1.05756	1.06892
125.9	17.5024	16.0528	-1.05566	0.000209631	1.05742	1.06885
126	17.5023	16.0527	-1.05273	0.000209629	1.05738	1.06879
126.1	17.5021	16.0526	-1.05273	0.000209626	1.05729	1.06872
126.2	17.5021	16.0526	-1.05078	0.000209624	1.05707	1.06865
126.3	17.502	16.0525	-1.04785	0.000209622	1.05693	1.06858
126.4	17.502	16.0525	-1.04883	0.00020962	1.05672	1.06851
126.5	17.5019	16.0524	-1.0459	0.000209617	1.05664	1.06844
126.6	17.5019	16.0524	-1.04102	0.000209615	1.05641	1.06837
126.7	17.5018	16.0523	-1.04102	0.000209613	1.05637	1.0683
126.8	17.5018	16.0523	-1.05273	0.000209611	1.05619	1.06823
126.9	17.5017	16.0522	-1.0498	0.000209609	1.05604	1.06816
127	17.5017	16.0522	-1.04688	0.000209606	1.05578	1.06809
127.1	17.5016	16.0521	-1.04687	0.000209604	1.05563	1.06802
127.2	17.5016	16.0521	-1.04688	0.000209602	1.05537	1.06795
127.3	17.5015	16.052	-1.04688	0.0002096	1.05533	1.06788
127.4	17.5015	16.052	-1.04785	0.000209597	1.05512	1.06781
127.5	17.5014	16.0519	-1.05176	0.000209595	1.05494	1.06775
127.6	17.5014	16.0519	-1.04785	0.000209593	1.05479	1.06768
127.7	17.5013	16.0518	-1.05469	0.000209591	1.05473	1.06761
127.8	17.5013	16.0518	-1.04297	0.000209589	1.05445	1.06754
127.9	17.5012	16.0517	-1.04687	0.000209586	1.05438	1.06747
128	17.5012	16.0517	-1.04785	0.000209584	1.05432	1.0674
128.1	17.5011	16.0516	-1.04492	0.000209582	1.05412	1.06733
128.2	17.5011	16.0516	-1.04492	0.00020958	1.05398	1.06726
128.3	17.501	16.0515	-1.05273	0.000209577	1.05389	1.06719
128.4	17.501	16.0515	-1.05566	0.000209575	1.05371	1.06712
128.5	17.5008	16.0514	-1.0498	0.000209573	1.05359	1.06705
128.6	17.5008	16.0514	-1.05273	0.000209571	1.05338	1.06698
128.7	17.5007	16.0513	-1.05078	0.000209569	1.05324	1.06691
128.8	17.5006	16.0512	-1.04297	0.000209566	1.05303	1.06684
128.9	17.5006	16.0512	-1.04297	0.000209564	1.05297	1.06678
129	17.5005	16.0511	-1.04004	0.000209562	1.05275	1.06671
129.1	17.5005	16.0511	-1.03711	0.00020956	1.05258	1.06664
129.2	17.5004	16.051	-1.03516	0.000209557	1.05254	1.06657
129.3	17.5004	16.051	-1.03711	0.000209555	1.0523	1.0665
129.4	17.5003	16.0509	-1.03516	0.000209553	1.05215	1.06643
129.5	17.5003	16.0509	-1.03223	0.000209551	1.05197	1.06636
129.6	17.5002	16.0508	-1.02051	0.000209549	1.05191	1.06629
129.7	17.5002	16.0508	-1.03516	0.000209546	1.05178	1.06622
129.8	17.5001	16.0507	-1.03516	0.000209544	1.05174	1.06615
129.9	17.5001	16.0507	-1.02051	0.000209542	1.05152	1.06608
130	17.5	16.0506	-1.02441	0.00020954	1.05143	1.06601
130.1	17.5	16.0506	-1.02441	0.000209537	1.05129	1.06594
130.2	17.4999	16.0505	-1.02246	0.000209535	1.05104	1.06588
130.3	17.4999	16.0505	-1.02246	0.000209533	1.05086	1.06581
130.4	17.4998	16.0504	-1.01953	0.000209531	1.05078	1.06574
130.5	17.4998	16.0504	-1.00684	0.000209529	1.05051	1.06567
130.6	17.4996	16.0503	-1.00684	0.000209526	1.05041	1.0656
130.7	17.4996	16.0503	-1.00684	0.000209524	1.05033	1.06553
130.8	17.4995	16.0502	-1.00684	0.000209522	1.05018	1.06546
130.9	17.4995	16.0502	-0.993164	0.00020952	1.05006	1.06539
131	17.4994	16.0501	-1.00293	0.000209517	1.05002	1.06532
131.1	17.4994	16.0501	-1.00195	0.000209515	1.04984	1.06525
131.2	17.4993	16.05	-1	0.000209513	1.04969	1.06518
131.3	17.4993	16.05	-0.997071	0.000209511	1.04957	1.06511
131.4	17.4992	16.0499	-1	0.000209509	1.04936	1.06505
131.5	17.4991	16.0498	-0.999023	0.000209506	1.04926	1.06498
131.6	17.4991	16.0498	-1.00488	0.000209504	1.04908	1.06491
131.7	17.499	16.0497	-1.00488	0.000209502	1.04891	1.06484
131.8	17.499	16.0497	-1.00977	0.0002095	1.04881	1.06477
131.9	17.4989	16.0496	-0.994141	0.000209497	1.04869	1.0647
132	17.4989	16.0496	-0.994141	0.000209495	1.04857	1.06463
132.1	17.4988	16.0495	-0.99707	0.000209493	1.04838	1.06456
132.2	17.4988	16.0495	-1.00488	0.000209491	1.04832	1.06449
132.3	17.4987	16.0494	-0.995117	0.000209489	1.04818	1.06442
132.4	17.4987	16.0494	-0.998047	0.000209486	1.04813	1.06435
132.5	17.4986	16.0493	-0.995117	0.000209484	1.04793	1.06428
132.6	17.4986	16.0493	-1	0.000209482	1.04787	1.06422
132.7	17.4984	16.0492	-0.99707	0.00020948	1.0477	1.06415
132.8	17.4984	16.0492	-0.99707	0.000209477	1.04748	1.06408
132.9	17.4983	16.0491	-0.994141	0.000209475	1.04738	1.06401
133	17.4983	16.0491	-0.998047	0.000209473	1.04721	1.06394
133.1	17.4982	16.049	-0.998047	0.000209471	1.04715	1.06387
133.2	17.4982	16.049	-0.998047	0.000209469	1.04697	1.0638
133.3	17.4981	16.0489	-1	0.000209466	1.04688	1.06373
133.4	17.4981	16.0489	-1	0.000209464	1.04666	1.06366
133.5	17.498	16.0488	-0.998047	0.000209462	1.04648	1.06359
133.6	17.498	16.0488	-0.998047	0.00020946	1.04637	1.06353
133.7	17.4979	16.0487	-1.00879	0.000209457	1.04627	1.06346
133.8	17.4979	16.0487	-1.00879	0.000209455	1.04617	1.06339
133.9	17.4978	16.0486	-1.00098	0.000209453	1.046	1.06332
134	17.4978	16.0486	-1.00098	0.000209451	1.04582	1.06325
134.1	17.4977	16.0485	-0.998047	0.000209449	1.04572	1.06318
134.2	17.4976	16.0484	-0.998046	0.000209446	1.04561	1.06311
134.3	17.4976	16.0484	-0.995118	0.000209444	1.04533	1.06304
134.4	17.4975	16.0483	-0.995117	0.000209442	1.04527	1.06297
134.5	17.4975	16.0483	-0.995117	0.00020944	1.04512	1.0629
134.6	17.4974	16.0482	-0.995117	0.000209438	1.04498	1.06283
134.7	17.4974	16.0482	-0.992188	0.000209435	1.04494	1.06277
134.8	17.4972	16.0481	-0.992188	0.000209433	1.04482	1.0627
134.9	17.4972	16.0481	-1	0.000209431	1.04467	1.06263
135	17.4971	16.048	-1	0.000209429	1.04463	1.06256
135.1	17.4971	16.048	-0.998047	0.000209426	1.04449	1.06249
135.2	17.497	16.0479	-0.995117	0.000209424	1.04426	1.06242
135.3	17.497	16.0479	-0.995117	0.000209422	1.04422	1.06235
135.4	17.4969	16.0478	-0.998047	0.00020942	1.04414	1.06228
135.5	17.4969	16.0478	-0.990234	0.000209418	1.04393	1.06221
135.6	17.4968	16.0477	-0.987305	0.000209415	1.04383	1.06215
135.7	17.4968	16.0477	-0.992187	0.000209413	1.04371	1.06208
135.8	17.4967	16.0476	-0.989258	0.000209411	1.04357	1.06201
135.9	17.4967	16.0476	-0.975586	0.000209409	1.0434	1.06194
136	17.4966	16.0475	-0.975586	0.000209406	1.04324	1.06187
136.1	17.4966	16.0475	-0.973633	0.000209404	1.04313	1.0618
136.2	17.4965	16.0474	-0.96875	0.000209402	1.04301	1.06173
136.3	17.4965	16.0474	-0.973633	0.0002094	1.04289	1.06166
136.4	17.4964	16.0473	-0.97168	0.000209398	1.04277	1.06159
136.5	17.4964	16.0473	-0.96875	0.000209395	1.04271	1.06152
136.6	17.4963	16.0472	-0.96875	0.000209393	1.04242	1.06146
136.7	17.4963	16.0472	-0.96875	0.000209391	1.0423	1.06139
136.8	17.4962	16.0471	-0.97168	0.000209389	1.04223	1.06132
136.9	17.4962	16.0471	-0.973633	0.000209386	1.04217	1.06125
137	17.496	16.047	-0.967773	0.000209384	1.04197	1.06118
137.1	17.4959	16.0469	-0.958984	0.000209382	1.04184	1.06111
137.2	17.4959	16.0469	-0.958984	0.00020938	1.04166	1.06104
137.3	17.4958	16.0468	-0.958984	0.000209378	1.04162	1.06097
137.4	17.4958	16.0468	-0.956055	0.000209375	1.04145	1.0609
137.5	17.4957	16.0467	-0.961914	0.000209373	1.04123	1.06084
137.6	17.4957	16.0467	-0.958984	0.000209371	1.04117	1.06077
137.7	17.4956	16.0466	-0.948242	0.000209369	1.04109	1.0607
137.8	17.4956	16.0466	-0.94336	0.000209366	1.04086	1.06063
137.9	17.4955	16.0465	-0.945313	0.000209364	1.04082	1.06056
138	17.4955	16.0465	-0.949219	0.000209362	1.04066	1.06049
138.1	17.4954	16.0464	-0.946289	0.00020936	1.04053	1.06042
138.2	17.4954	16.0464	-0.944336	0.000209358	1.04053	1.06035
138.3	17.4953	16.0463	-0.944336	0.000209355	1.04031	1.06028
138.4	17.4953	16.0463	-0.944336	0.000209353	1.04031	1.06022
138.5	17.4952	16.0462	-0.956055	0.000209351	1.0402	1.06015
138.6	17.4952	16.0462	-0.956055	0.000209349	1.04002	1.06008
138.7	17.4951	16.0461	-0.953125	0.000209347	1.03996	1.06001
138.8	17.4951	16.0461	-0.950195	0.000209344	1.03988	1.05994
138.9	17.495	16.046	-0.950195	0.000209342	1.03967	1.05987
139	17.495	16.046	-0.950195	0.00020934	1.03951	1.0598
139.1	17.4948	16.0459	-0.950195	0.000209338	1.03951	1.05973
139.2	17.4948	16.0459	-0.945313	0.000209335	1.03943	1.05967
139.3	17.4947	16.0458	-0.945313	0.000209333	1.03922	1.0596
139.4	17.4947	16.0458	-0.946289	0.000209331	1.03908	1.05953
139.5	17.4946	16.0457	-0.943359	0.000209329	1.03908	1.05946
139.6	17.4946	16.0457	-0.941406	0.000209327	1.03902	1.05939
139.7	17.4945	16.0456	-0.941406	0.000209324	1.03887	1.05932
139.8	17.4944	16.0455	-0.941406	0.000209322	1.03875	1.05925
139.9	17.4944	16.0455	-0.935547	0.00020932	1.03852	1.05918
140	17.4943	16.0454	-0.935547	0.000209318	1.03848	1.05912
140.1	17.4943	16.0454	-0.935547	0.000209315	1.03828	1.05905
[truncated: 5,206 more rows]

## Sheet: Figure 4c right panel
						KD values (Dissociation constant)
						In Micromolar	In Micromolar	In Micromolar
						PRL-GAL	PRL-ACTH	GH-GAL
					SET 1	0.119	3.5	18.5
					SET 2	0.378	12.3	8.25
					SET 3	0.751	5.71	32.4
					Mean	0.416	7.17	19.7167
					StdEV	0.317709	4.57807	12.1209
