# Supplementary material for: Co-aggregation and secondary nucleation in the life cycle of human prolactin/galanin functional amyloids
Source: eLife. 2022 Mar 8;11:e73835. doi: 10.7554/eLife.73835 (PMC8993219; doi:10.7554/eLife.73835)
Supplement: Figure 4—source data 3. [file elife-73835-fig4-data3.xlsx]

## Sheet: Sheet1
							PRL-GAL			ka or kon				kd or koff				KD=(kd/ka)						KD in micromolar
							ka (1/Ms)	kd (1/s)		Avg	Stdev	Stderr		Avg	Stdev	Stderr				Avg	Stdev	Stderr		Avg	Stdev	Stderr
						SET 1	10628	0.00127		9975.67	1972.15	1138.65		0.00429	0.00388294	0.00224188		1.19496e-07		4.16146e-07	3.17695e-07	1.83427e-07		0.416146	0.317695	0.183427
						SET 2	7760	0.00293										3.77577e-07
						SET 3	11539	0.00867										7.51365e-07
							PRL-ACTH			ka or kon				kd or koff				KD=(kd/ka)
							ka (1/Ms)	kd (1/s)		Avg	Stdev	Stderr		Avg	Stdev	Stderr				Avg	Stdev	Stderr
						SET 1	2801	0.00984		1780.67	923.527	533.214		0.0103933	0.0018917	0.00109221		3.51303e-06		7.24402e-06	4.66551e-06	2.69371e-06		7.24402	4.66551	2.69371
						SET 2	1002	0.0125										1.2475e-05
						SET 3	1539	0.00884										5.74399e-06
							GH-GAL			ka or kon				kd or koff				KD=(kd/ka)
							ka (1/Ms)	kd (1/s)		Avg	Stdev	Stderr		Avg	Stdev	Stderr				Avg	Stdev	Stderr
						SET 1	751	0.0139		746.333	195.042	112.611		0.0131433	0.00505763	0.00292011		1.85087e-05		1.97161e-05	1.21116e-05	6.99282e-06		19.7161	12.1116	6.99282
						SET 2	939	0.00775										8.25346e-06
						SET 3	549	0.01778										3.23862e-05
