# Supplementary material for: Co-aggregation and secondary nucleation in the life cycle of human prolactin/galanin functional amyloids
Source: eLife. 2022 Mar 8;11:e73835. doi: 10.7554/eLife.73835 (PMC8993219; doi:10.7554/eLife.73835)
Supplement: Figure 5—source data 1. [file elife-73835-fig5-data1.xlsx]

## Sheet: Figure 5a
			PRL		GAL		PRL+CSA		GAL+Hep		PRL from PRL+CSA		GAL from GAL+Hep
		Time (hrs)	Mean	StdErr	Mean	StdErr	Mean	StdErr	Mean	StdErr	Mean	StdErr	Mean	StdErr
		0	0	0	0	0	0	0	0	0	0	0	0	0
		6	10.9526	3.18398	10.0942	3.23029	4.54082	1.24112	6.87572	2.30345	5.07317	0.40673	7.33048	3.19942
		12	12.7874	2.81707	18.072	2.95757	6.35374	1.42508	9.73581	1.52941	7.93582	0.91906	10.0296	3.42792
		18	16.2368	2.88635	21.5149	2.95417	7.64667	1.3811	12.4754	1.5706	11.4523	2.10473	14.1755	5.68442
		24	25.2095	1.01506	26.1029	3.67812	10.9075	0.976	15.7338	1.55703	13.92	1.9901	19.5916	4.4804
		36	28.5069	1.16971	31.5847	5.243	13.1867	0.95959	18.9331	0.87279	16.8793	2.71556	22.5559	6.62811
		48	32.3341	0.93387	40.1087	6.28229	14.7953	1.00421	22.2833	2.01712	21.2096	1.49235	25.0707	7.05031
		60	36.1896	1.20787	44.0747	6.77285	18.7086	3.01977	25.4067	2.41464	23.4643	2.11229	34.1697	6.26594
		72	37.8946	0.78726	49.7723	6.88015	19.7275	3.181	28.4384	4.11351	27.8001	1.54414	37.45	7.51769
		84	40.8711	1.51004	56.0909	8.39041	22.392	2.97396	33.3165	3.43773	28.6087	1.09092	41.3951	7.5208
		96	42.6889	1.23416	61.337	5.49521	24.198	2.89285	33.0654	2.82505	28.7678	1.293	42.5278	7.74536
		108	42.624	1.35067	60.7992	6.40255	24.9267	2.23496	33.083	3.3455	27.0281	2.82686	43.0573	9.85578
		120	42.847	0.79345	62.8519	5.65141	24.8898	2.51924	32.9065	2.83907	27.7971	2.79192	41.8635	11.7368
			PRL							GAL							PRL+CSA
		Time (hrs)	Set 1	Set 2	Set 3	Mean	StdEv	StdErr		Set 1	Set 2	Set 3	Mean	StdEv	StdErr		Set 1	Set 2	Set 3	Mean	StdEv	StdErr
		0	0	0	0	0	0	0		0	0	0	0	0	0		0	0	0	0	0	0
		6	7.31961	17.2982	8.24013	10.9526	5.51465	3.18398		16.2508	5.32041	8.71132	10.0942	5.59486	3.23029		3.68766	6.98606	2.94875	4.54082	2.14962	1.24112
		12	9.69402	18.412	10.2562	12.7874	4.87916	2.81707		19.8508	12.2972	22.068	18.072	5.1225	2.95757		6.21069	8.89039	3.96013	6.35374	2.46824	1.42508
		18	18.1345	20.0093	10.5667	16.2368	4.99916	2.88635		24.6804	15.6119	24.2524	21.5149	5.11663	2.95417		6.82853	10.3405	5.77102	7.64667	2.39207	1.3811
		24	24.2873	27.2368	24.1043	25.2095	1.75809	1.01506		30.9333	18.8831	28.4921	26.1029	6.37051	3.67812		11.4992	12.2226	9.00078	10.9075	1.69043	0.975997
		36	26.6919	28.1363	30.6926	28.5069	2.02594	1.16971		36.827	21.099	36.828	31.5847	9.08088	5.243		11.8224	15.0377	12.7001	13.1867	1.66201	0.959589
		48	31.8314	34.1433	31.0277	32.3341	1.61747	0.933872		45.2678	27.6079	47.4505	40.1087	10.8809	6.28229		14.9479	16.4532	12.9847	14.7953	1.73928	1.00421
		60	35.9584	38.3877	34.2228	36.1896	2.09204	1.20787		45.1897	31.8265	55.208	44.0747	11.7306	6.77285		16.5317	24.6757	14.9185	18.7086	5.23023	3.01977
		72	38.9683	38.3552	36.3605	37.8946	1.36354	0.787261		52.2443	36.8137	60.2588	49.7723	11.9164	6.88015		17.1005	26.0588	16.0232	19.7275	5.50949	3.181
		84	43.1392	41.4639	38.0102	40.8711	2.61538	1.51004		60.2489	39.9329	68.0908	56.0909	14.5322	8.39041		18.4898	28.2305	20.4559	22.392	5.1509	2.97396
		96	44.6305	43.0378	40.3983	42.6889	2.13757	1.23416		64.5751	50.6227	68.8132	61.337	9.51771	5.49521		19.9623	29.7289	22.9029	24.198	5.01042	2.89285
		108	44.7954	42.93	40.1468	42.624	2.33936	1.35067		61.0981	49.5635	71.7359	60.7992	11.0892	6.40255		21.1241	28.8626	24.7934	24.9267	3.87095	2.23496
		120	44.3091	42.6501	41.5818	42.847	1.37425	0.793448		63.9552	52.5588	72.0418	62.8519	9.78823	5.65141		21.2909	29.7429	23.6357	24.8898	4.36332	2.51924
			GAL+Hep							PRL from PRL+GAL							GAL from PRL+GAL
		Time (hrs)	Set 1	Set 2	Set 3	Mean	StdEv	StdErr		Set 1	Set 2	Set 3	Mean	StdEv	StdErr		Set 1	Set 2	Set 3	Mean	StdEv	StdErr
		0	0	0	0	0	0	0		0	0	0	0	0	0		0	0	0	0	0	0
		6	11.4816	4.64966	4.49588	6.87572	3.98957	2.30345		4.71555	4.61927	5.88471	5.07317	0.704455	0.406729		4.3669	3.90106	13.7235	7.33048	5.5414	3.19942
		12	12.7805	8.46664	7.96026	9.73581	2.64893	1.52941		6.87088	7.17085	9.76571	7.93582	1.59182	0.919065		8.10766	5.29146	16.6896	10.0296	5.93716	3.42792
		18	15.5833	11.316	10.5269	12.4754	2.72028	1.5706		9.39307	9.30245	15.6613	11.4523	3.6454	2.10473		7.82304	9.18668	25.5167	14.1755	9.84542	5.68442
		24	18.7446	14.9165	13.5402	15.7338	2.69677	1.55703		11.8569	12.004	17.8992	13.92	3.44686	1.9901		15.9924	14.2846	28.4977	19.5916	7.76005	4.4804
		36	20.6179	18.4863	17.6953	18.9331	1.51168	0.872795		13.6831	14.6749	22.28	16.8793	4.70335	2.71556		16.2596	15.6018	35.8063	22.5559	11.4799	6.62811
		48	26.1385	19.3268	21.3847	22.2833	3.49364	2.01712		20.4347	19.1009	24.0932	21.2096	2.58475	1.49235		18.7752	17.2921	39.1449	25.0707	12.2111	7.05031
		60	29.0296	26.3604	20.83	25.4067	4.18215	2.41464		21.6691	21.0501	27.6736	23.4643	3.65848	2.11229		27.7192	28.0905	46.6994	34.1697	10.8526	6.26594
		72	34.3996	30.3678	20.5478	28.4384	7.12461	4.11351		25.7032	26.8852	30.812	27.8001	2.67446	1.54414		30.2341	29.635	52.4809	37.45	13.0206	7.51769
		84	39.727	32.2629	27.9594	33.3165	5.95415	3.43773		26.7999	28.4566	30.5696	28.6087	1.88948	1.09092		34.2474	33.5077	56.4302	41.3951	13.026	7.5208
		96	37.9579	33.0662	28.172	33.0654	4.89299	2.82505		27.7797	27.1923	31.3314	28.7678	2.23947	1.293		34.3508	35.2227	58.0099	42.5278	13.415	7.74536
		108	39.3189	32.0651	27.8649	33.083	5.79441	3.3455		25.2337	23.2823	32.5682	27.0281	4.89612	2.82686		38.4343	28.7746	61.9628	43.0573	17.0702	9.85578
		120	37.7785	32.9957	27.9452	32.9065	4.91727	2.83907		25.4965	24.5414	33.3535	27.7972	4.8356	2.79192		30.0075	30.2472	65.3359	41.8635	20.3281	11.7368

## Sheet: Figure 5b
						PRL		GAL		PRL+CSA		GAL+Hep		PRL from PRL+GAL		GAL from PRL+GAL
						Mean	StdErr	Mean	StdErr	Mean	StdErr	Mean	StdErr	Mean	StdErr	Mean	StdErr
					Saturation Concentration	42.847	0.79345	62.852	5.6514	24.89	2.5192	32.906	2.8391	27.797	2.7919	41.864	11.737
						PRL				GAL
						Set 1	Set 2	Set 3		Set 1	Set 2	Set 3
						44.3091	42.6501	41.5818		63.9552	52.5588	72.0418
						PRL+CSA				GAL+Hep
						Set 1	Set 2	Set 3		Set 1	Set 2	Set 3
						21.2909	29.7429	23.6357		37.7785	32.9957	27.9452
						PRL from PRL+GAL				GAL from PRL+GAL
						Set 1	Set 2	Set 3		Set 1	Set 2	Set 3
						25.4965	24.5414	33.3535		30.0075	30.2472	65.3359

## Sheet: Figure 5c
						Wavelength (nm)	PRL	PRL from PRL+GAL	PRL+CSA	GAL	GAL+Hep	GAL from PRL+GAL
						260	0	0	0	0	0	0
						259	-0.000791	-0.021313	-0.0051011	0.00691	0.022801	-0.001952
						258	0.009054	-0.055596	0.0086243	0.016343	0.032961	-0.012598
						257	0.022561	-0.073243	0.025288	0.024285	0.038818	-0.01756
						256	0.033802	-0.080609	0.03309	0.034507	0.038274	-0.03952
						255	0.034995	-0.089749	0.021241	0.037447	0.032425	-0.071348
						254	0.026751	-0.094843	-0.0009513	0.01762	-0.003941	-0.11918
						253	0.018336	-0.11714	-0.040455	-0.010384	-0.077407	-0.15971
						252	0.015064	-0.13686	-0.055375	-0.049586	-0.14091	-0.1862
						251	0.021488	-0.13719	-0.070287	-0.093725	-0.18854	-0.17476
						250	0.015125	-0.11752	-0.073694	-0.10271	-0.21034	-0.18385
						249	-0.045279	-0.14024	-0.086396	-0.14723	-0.25361	-0.18993
						248	-0.1275	-0.17762	-0.096212	-0.18551	-0.27835	-0.25663
						247	-0.24758	-0.25221	-0.13825	-0.24924	-0.3363	-0.29893
						246	-0.34929	-0.3175	-0.16076	-0.30954	-0.36137	-0.3252
						245	-0.42469	-0.35741	-0.19608	-0.33587	-0.343	-0.33007
						244	-0.50874	-0.41574	-0.25366	-0.37088	-0.30666	-0.34324
						243	-0.60891	-0.48127	-0.32901	-0.40663	-0.26836	-0.34301
						242	-0.76039	-0.5985	-0.42981	-0.46259	-0.27514	-0.33741
						241	-0.93177	-0.74771	-0.52263	-0.49611	-0.27435	-0.33705
						240	-1.1768	-0.91007	-0.60454	-0.52672	-0.25887	-0.37515
						239	-1.471	-1.1271	-0.7197	-0.5524	-0.24653	-0.41495
						238	-1.8463	-1.3913	-0.88445	-0.57863	-0.26368	-0.45719
						237	-2.2571	-1.7237	-1.0958	-0.6361	-0.32717	-0.47848
						236	-2.7081	-2.0729	-1.3505	-0.70085	-0.4032	-0.4743
						235	-3.2063	-2.4615	-1.6437	-0.77915	-0.45362	-0.45859
						234	-3.7381	-2.8708	-1.9184	-0.84631	-0.46667	-0.4741
						233	-4.2846	-3.3159	-2.2179	-0.89364	-0.47889	-0.53768
						232	-4.8808	-3.7817	-2.5407	-0.95934	-0.49537	-0.65572
						231	-5.4809	-4.2245	-2.8443	-0.98775	-0.48953	-0.76985
						230	-6.1077	-4.6901	-3.1314	-1.0102	-0.45875	-0.88141
						229	-6.7232	-5.1528	-3.4165	-1.0472	-0.39964	-0.979
						228	-7.3114	-5.5916	-3.6978	-1.0836	-0.31896	-1.0755
						227	-7.8706	-6.0421	-4.0117	-1.1569	-0.27756	-1.1675
						226	-8.3556	-6.4201	-4.3033	-1.1782	-0.25448	-1.2199
						225	-8.7232	-6.7438	-4.5303	-1.1938	-0.24853	-1.2841
						224	-9.0169	-6.9704	-4.7183	-1.1935	-0.24519	-1.3214
						223	-9.198	-7.1344	-4.8412	-1.2196	-0.20592	-1.3359
						222	-9.3145	-7.2225	-4.9125	-1.2618	-0.18596	-1.332
						221	-9.3466	-7.2181	-4.9304	-1.2575	-0.17892	-1.3187
						220	-9.3886	-7.1468	-4.9358	-1.27	-0.20856	-1.2818
						219	-9.408	-7.0423	-4.9111	-1.2955	-0.24548	-1.2623
						218	-9.3948	-6.9719	-4.9249	-1.3774	-0.28349	-1.2323
						217	-9.3806	-6.9507	-4.9612	-1.5314	-0.31622	-1.236
						216	-9.3231	-6.9445	-4.9739	-1.6831	-0.32317	-1.2841
						215	-9.3512	-7.0144	-5.0108	-1.8919	-0.42604	-1.4239
						214	-9.4319	-7.1401	-5.0516	-2.1082	-0.54555	-1.6369
						213	-9.5844	-7.3165	-5.1068	-2.3837	-0.71887	-1.9088
						212	-9.7944	-7.5118	-5.1531	-2.7221	-0.88596	-2.2508
						211	-9.9862	-7.6843	-5.1833	-3.1001	-1.0593	-2.6236
						210	-10.131	-7.762	-5.1638	-3.5123	-1.2182	-3.0144
						209	-10.171	-7.7054	-5.1015	-3.9369	-1.4149	-3.5158
						208	-10.031	-7.5171	-4.9772	-4.5356	-1.7258	-4.0458
						207	-9.6356	-7.2057	-4.8112	-5.3013	-2.1683	-4.6667
						206	-8.912	-6.7325	-4.5536	-6.2208	-2.74	-5.3363
						205	-7.7854	-6.0834	-4.1848	-7.1576	-3.2722	-6.0585
						204	-6.3275	-5.0634	-3.6409	-8.1022	-3.8757	-6.7787
						203	-4.2995	-3.5951	-2.7212	-9.1242	-4.5866	-7.4768
						202	-1.9413	-1.8786	-1.5806	-10.141	-5.2933	-8.1039
						201	0.50143	-0.051765	-0.31606	-11.053	-5.9531	-8.6857
						200	2.8165	1.7135	0.97439	-11.836	-6.4786	-9.215
						199	4.8695	3.3235	2.1749	-12.403	-6.8823	-9.6813
						198	6.5506	4.6731	3.2182	-12.799	-7.1209	-10.037

## Sheet: Figure 5d
																Fold Increase
					SET 1	Blank		PRL								Division by blank										PRL
					C1	0.019		Concentration (uM)	SET 1		SET 2		SET 3			SET 1			SET 2			SET 3
					C2	0.011		0	0	0	0	0	0	0		0		Mean			Mean			Mean		Mean SET 1	Mean SET 2	Mean SET 3		Mean	StdEv	StdErr
						0.015		0.5	0.1	0.18	0.09	0.1	0.097	0.12		6.66667	12	9.33333	6.42857	7.14286	6.78571	5.10526	6.31579	5.71053		9.33333	6.78571	5.71053		7.27652	1.86061	1.07425
					SET 2			1	0.15	0.2	0.165	0.173	0.19	0.21		10	13.3333	11.6667	11.7857	12.3571	12.0714	10	11.0526	10.5263		11.6667	12.0714	10.5263		11.4215	0.801208	0.462591
					C1	0.017		1.5	0.28	0.34	0.2225	0.203	0.3	0.35		18.6667	22.6667	20.6667	15.8929	14.5	15.1964	15.7895	18.4211	17.1053		20.6667	15.1964	17.1053		17.6561	2.77641	1.60301
					C2	0.011		2	0.51	0.67	0.525	0.487	0.56	0.61		34	44.6667	39.3333	37.5	34.7857	36.1429	29.4737	32.1053	30.7895		39.3333	36.1429	30.7895		35.4219	4.31732	2.49268
						0.014		2.5	1.23	1.45	0.975	1.109	1.37	1.42		82	96.6667	89.3333	69.6429	79.2143	74.4286	72.1053	74.7368	73.4211		89.3333	74.4286	73.4211		79.061	8.91037	5.14455
								3	1.87	1.9	1.31	1.43	1.88	1.85		124.667	126.667	125.667	93.5714	102.143	97.8571	98.9474	97.3684	98.1579		125.667	97.8571	98.1579		107.227	15.9697	9.2204
					SET 3			3.5	1.92	1.92	1.475	1.567	1.94	1.92		128	128	128	105.357	111.929	108.643	102.105	101.053	101.579		128	108.643	101.579		112.741	13.6789	7.89773
					C1	0.021		4	1.94	1.93	1.575	1.543	1.92	1.9		129.333	128.667	129	112.5	110.214	111.357	101.053	100	100.526		129	111.357	100.526		113.628	14.372	8.29793
					C2	0.017
						0.019
								PRL+CSA																		PRL+CSA
					SET 1	Blank		Concentration (uM)	SET 1		SET 2		SET 3			SET 1			SET 2			SET 3
					C1	0.019		0	0	0	0	0	0					Mean			Mean			Mean		Mean SET 1	Mean SET 2	Mean SET 3		Mean	StdEv	StdErr
					C2	0.011		0.5	0.028	0.03	0.019	0.022	0.042	0.056		1.86667	2	1.93333	1.35714	1.57143	1.46429	2.21053	2.94737	2.57895		1.93333	1.46429	2.57895		1.99219	0.559657	0.323127
						0.015		1	0.073	0.062	0.081	0.079	0.071	0.067		4.86667	4.13333	4.5	5.78571	5.64286	5.71429	3.73684	3.52632	3.63158		4.5	5.71429	3.63158		4.61529	1.04613	0.604
					SET 2			1.5	0.18	0.15	0.19	0.22	0.167	0.152		12	10	11	13.5714	15.7143	14.6429	8.78947	8	8.39474		11	14.6429	8.39474		11.3459	3.13839	1.812
					C1	0.017		2	0.46	0.341	0.56	0.59	0.372	0.389		30.6667	22.7333	26.7	40	42.1429	41.0714	19.5789	20.4737	20.0263		26.7	41.0714	20.0263		29.2659	10.7546	6.20937
					C2	0.011		2.5	0.89	0.78	0.81	0.98	0.76	0.89		59.3333	52	55.6667	57.8571	70	63.9286	40	46.8421	43.4211		55.6667	63.9286	43.4211		54.3388	10.318	5.9573
						0.014		3	1.57	1.45	1.72	1.7	1.48	1.17		104.667	96.6667	100.667	122.857	121.429	122.143	77.8947	61.5789	69.7368		100.667	122.143	69.7368		97.5155	26.3447	15.2106
								3.5	1.63	1.52	1.78	1.81	1.49	1.23		108.667	101.333	105	127.143	129.286	128.214	78.4211	64.7368	71.5789		105	128.214	71.5789		101.598	28.4705	16.438
					SET 3			4	1.621	1.58	1.89	1.82	1.56	1.37		108.067	105.333	106.7	135	130	132.5	82.1053	72.1053	77.1053		106.7	132.5	77.1053		105.435	27.719	16.0041
					C1	0.021
					C2	0.017
						0.019
								PRL+GAL																		PRL+GAL
					SET 1	Blank		Concentration (uM)	SET 1		SET 2		SET 3			SET 1			SET 2			SET 3
					C1	0.019		0	0	0	0	0	0	0				Mean			Mean			Mean		Mean SET 1	Mean SET 2	Mean SET 3		Mean	StdEv	StdErr
					C2	0.011		0.5	0.027	0.026	0.017	0.023	0.034	0.031		1.8	1.73333	1.76667	1.21429	1.64286	1.42857	1.78947	1.63158	1.71053		1.76667	1.42857	1.71053		1.63525	0.181181	0.104608
						0.015		1	0.057	0.063	0.092	0.097	0.069	0.072		3.8	4.2	4	6.57143	6.92857	6.75	3.63158	3.78947	3.71053		4	6.75	3.71053		4.82018	1.67753	0.968552
					SET 2			1.5	0.171	0.195	0.18	0.19	0.187	0.192		11.4	13	12.2	12.8571	13.5714	13.2143	9.84211	10.1053	9.97368		12.2	13.2143	9.97368		11.796	1.65765	0.957071
					C1	0.017		2	0.389	0.376	0.47	0.52	0.385	0.412		25.9333	25.0667	25.5	33.5714	37.1429	35.3571	20.2632	21.6842	20.9737		25.5	35.3571	20.9737		27.2769	7.35453	4.24626
					C2	0.011		2.5	0.695	0.723	0.87	0.98	0.734	0.789		46.3333	48.2	47.2667	62.1429	70	66.0714	38.6316	41.5263	40.0789		47.2667	66.0714	40.0789		51.139	13.4219	7.74939
						0.014		3	1.423	1.401	1.67	1.71	1.417	1.612		94.8667	93.4	94.1333	119.286	122.143	120.714	74.5789	84.8421	79.7105		94.1333	120.714	79.7105		98.186	20.8001	12.0093
								3.5	1.593	1.61	1.98	1.88	1.64	1.92		106.2	107.333	106.767	141.429	134.286	137.857	86.3158	101.053	93.6842		106.767	137.857	93.6842		112.769	22.69	13.1005
					SET 3			4	1.621	1.731	1.89	1.92	1.673	1.72		108.067	115.4	111.733	135	137.143	136.071	88.0526	90.5263	89.2895		111.733	136.071	89.2895		112.365	23.3974	13.5089
					C1	0.021
					C2	0.017
						0.019

## Sheet: Figure 5e
							EC50		PRL
									Set 1	Set 2	Set 3		Mean	StdEv	Stderr
									2.315	2.333	2.29		2.31267	0.0215948	0.0124681
									PRL+CSA
									Set 1	Set 2	Set 3		Mean	StdEv	Stderr
									2.463	2.482	2.419		2.45467	0.0323161	0.0186583
									PRL from PRL+GAL
									Set 1	Set 2	Set 3		Mean	StdEv	Stderr
									2.607	2.524	2.577		2.56933	0.0420278	0.0242655
